# Supplementary material for: Vaginal and neonatal microbiota in pregnant women with preterm premature rupture of membranes and consecutive early onset neonatal sepsis
Source: Springer Nature journal article supplement (doi:10.1186/s12916-023-02805-x), 2023-03-13

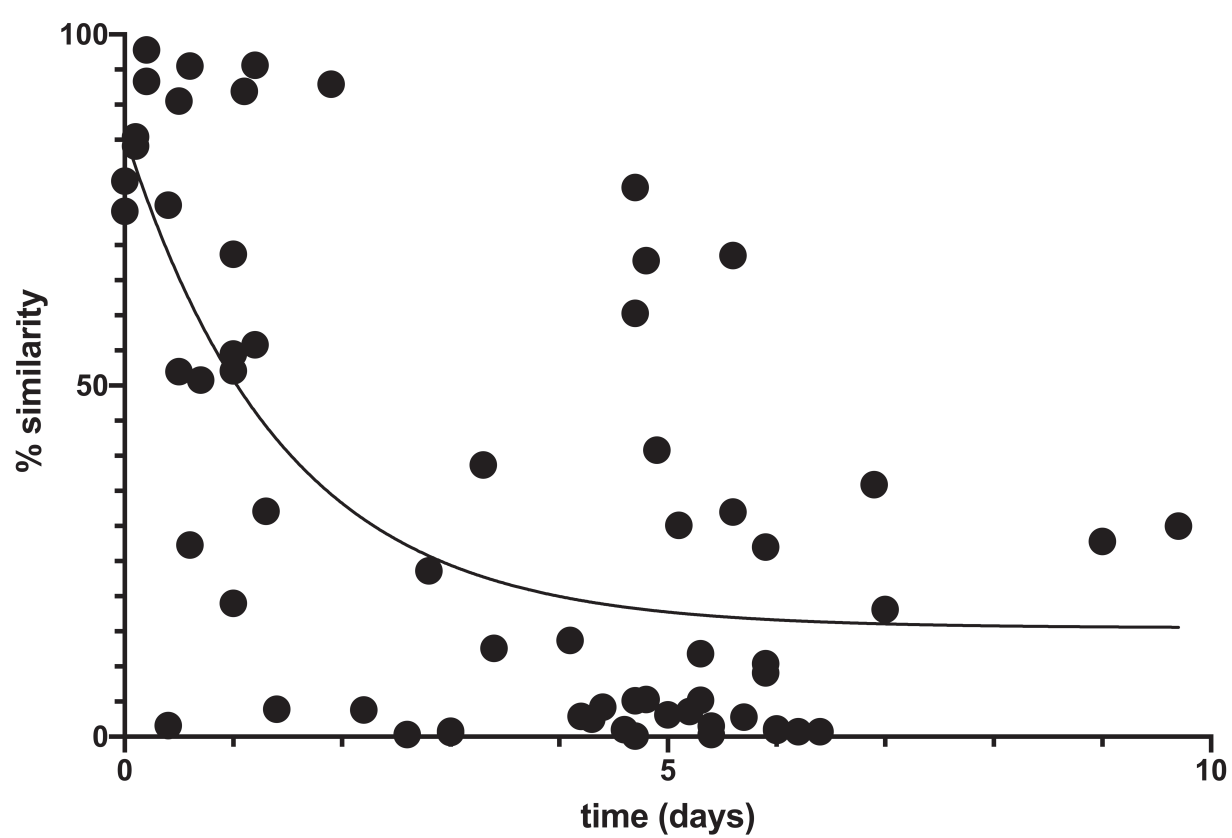

Supplement: MOESM8 [file 24618028]
