# Supplementary material for: Vaginal and neonatal microbiota in pregnant women with preterm premature rupture of membranes and consecutive early onset neonatal sepsis
Source: BMC Med. 2023 Mar 13;21:92. doi: 10.1186/s12916-023-02805-x (PMC10009945; doi:10.1186/s12916-023-02805-x)
Supplement: Supplementary file 2 — Additional file 2: Table S2. PPROM patients and neonates included in the current study. [file 12916_2023_2805_MOESM2_ESM.xlsx]

## Sheet: Supplementary Table 2
Supplementary Table 2. PPROM patients and neonates included in the current study
					Availability of neonatal samples				Availability of vaginal samples
Patient	Delivery mode	Gestational age	Twins	EONS	Meconium	Pharyngeal swab	Rectal swab	Umbilical cord blood	V1 or corresponding	V2
H01	C	29		E						X
H02	V	32		E		X	X	X	X	X
H03	C	33	yes	E (B)	A,B	A,B	A,B	B		X
H04	C	32		N	X		X	X		X
H05	V	31		N	X	X	X	X		X
H06	V	33	yes	N	A,B	A,B	A,B	A,B		X
H07	C	29		N	X		X			X
H08	V	33		N	X	X	X	X	X	X
H09	C	29		N	X		X			X
H10	V	39		N	X	X	X	X	X
H11	C	27	yes	E (A,B)		B	A		X	X
H12	ND	ND		N
H13	V	31		N	X	X	X	X	X	X
H14	C	34		N	X	X	X		X	X
H15	V	41		N					X
H16	Vac	36		N	X	X	X	X	X
H18	V	32		N	X	X	X	X	X	X
H19	C	26		N	X	X	X	X	X
H20	V	34		N	X					X
H21	V	33		N	X	X	X			X
H23	C	24		E	X	X	X
H24	C	29		N	X	X			X
H25	C	27		N
H26	Vac	33		N		X				X
IN15	V	34		N	X	X				X
J01	C	29		E	X	X	X	X	X	X
J02	V	32		N	X	X	X	X		X
J04	V	41		N					X
J05	V	31		N	X	X	X	X		X
J06	C	33		N	X	X	X	X	X	X
J07	C	25	yes	E (A)	B	A,B	A,B	A,B		X
J08	C	29		N	X	X	X	X	X	X
J09	V	37		N	X	X	X	X	X	X
J10	V	31		N	X	X	X	X	X	X
J11	C	34		N	X		X	X	X	X
J13	C	28		E	X	X	X	X	X	X
J14	C	39		N					X
J15	V	26		N		X	X			X
J17	C	32		N	X	X	X	X		X
J18	C	26	yes	E (A,B)	A,B	A,B	A,B	A	X	X
J26	C	28		N		X	X		X
J27	C	27		N		X	X	X	X	X
J28	C	24	yes	E (B)	A,B	A,B	A,B	A		X
J29	V	32		E	X	X	X	X	X	X
J30	V	31		N				X	X	X
J31	C	31		N	X	X	X	X	X	X
J32	V	34		E	X	X	X	X	X	X
J33	C	28		N	X				X	X
J34	V	34		N	X		X		X	X
J35	C	32		N	X	X				X
J36	C	25		N	X	X	X	X	X
J37	C	30		N	X		X			X
J38	C	33		N	X	X	X		X	X
J39	V	34		N	X	X			X	X
J40	C	25		N	X
J41	C	33		N	X		X		X	X
J42	C	34		N	X		X		X	X
J45	V	33		N	X		X		X	X
J46	C	26		N					X	X
J47	C	32		N	X					X
J48	C	33	yes	N	A,B					X
J50	C	33	yes	N		B	A,B			X
J51	C	28	yes	N		A		A
J52	C	34	yes	N	A,B				X	X
R02	V	34		N	X	X	X	X		X
R03	C	27		E		X	X		X	X
R04	V	32		N	X	X	X	X		X
R05	V	34		N		X	X	X		X
R07	V	32		E		X	X		X	X
R08	C	28	yes	N		B	A	A		X
R09	V	34		N	X	X	X	X	X	X
R10	C	24		E	X	X				X
R11	C	34		N					X	X
R12	C	34		N			X		X
R13	V	33		N	x	X				X
R14	C	24		N				X		X
R15	C	30		N	X				X	X
R18	V	31		E					X	X
a C: caesarian section; V: vaginal birth; vac: vacuum extraction: ND, not determined
b A: sample available from twin A; B: sample available from twin B; A,B: sample available from both twins
c An initial sample (V0) collected at the first clinical examination after confirmation of PPROM and prior antibiotics therapy was available for most patients. Samples collected <48h antibiotic treatment were considered equivalent to V0 samples and used when the true one was absent. V1 samples were collected after 2 -7 days of antibiotic treatment (V1), when available. All samples, taken between …
