# Supplementary material for: Vaginal and neonatal microbiota in pregnant women with preterm premature rupture of membranes and consecutive early onset neonatal sepsis
Source: BMC Med. 2023 Mar 13;21:92. doi: 10.1186/s12916-023-02805-x (PMC10009945; doi:10.1186/s12916-023-02805-x)
Supplement: Supplementary file 3 — Additional file 3: Table S3. Classification of vaginal samples taken at delivery. [file 12916_2023_2805_MOESM3_ESM.xlsx]

## Sheet: Supplementary Table 3
Supplementary Table 3. Classification of vaginal samples taken at delivery
Patient	time between admission and delivery (days)a	V2 samples <2d AB treated	V2 samples >2 d AB treated	V2 samples >6 d AB treated	V2 samples >6 d AB treated, recoveredb
H01	V0	V2E
H02	24.0625		V2M	V2L
H03	V0	V2E
H04	0.520833	V2E
H05	1.08472	V2E
H06	V0	V2E
H07	1.20139	V2E
H08	4.60417		V2M
H09	V0	V2E
H11	9.6		V2M	V2L
H13	5.22639		V2M
H14	2.78472		V2M
H18	13.2		V2M	V2L
H20	V0	V2E
H21	V0	V2E
H26	V0	V2E
IN15	0.744444	V2E
J01	42.3438		V2M	V2L	V2R
J02	V0	V2E
J05	0.972222	V2E
J06	2.47917		V2M
J07	1.02778	V2E
J08	32.3785		V2M	V2L	V2R
J09	56.6236		V2M	V2L	V2R
J10	3.41667		V2M
J11	72.8611		V2M	V2L	V2R
J13	7.10417		V2M	V2L
J15	V0	V2E
J17	0.131944	V2E
J18	16.9826		V2M	V2L	V2R
J27	18.2188		V2M	V2L	V2R
J28	0.572917	V2E
J29	9.075		V2M	V2L
J30	6		V2M	V2L	V2R
J31	4.10208		V2M
J32	14.1944		V2M	V2L	V2R
J33	19.5729		V2M	V2L	V2R
J34	5.37361		V2M
J35	1.40694	V2E
J37	0.0659722	V2E
J38	27.7667		V2M	V2L	V2R
J39	5.07222		V2M
J41	3.35347		V2M
J42	44.9688		V2M	V2L	V2R
J45	2.16667		V2M
J46	25.2257		V2M	V2L
J47	0.972222	V2E
J48	0.902778	V2E
J50	1.25	V2E
J52	9.32847		V2M	V2L	V2R
R02	0.166667	V2E
R03	10.1229		V2M	V2L
R04	1.29792	V2E
R05	1.90625	V2E
R07	4.98611		V2M
R08	0.236111	V2E
R09	10.2917		V2M	V2L
R10	0.423611	V2E
R11	17.4583		V2M	V2L
R13	V0	V2E
R14	0.128472	V2E
R15	2.61111		V2M
R18	12.2611		V2M	V2L
a V0: no V2 sample available but delivery <2 days after V0
b antibiotic treatment stopped at least 2 days before delivery
