# Supplementary material for: Vaginal and neonatal microbiota in pregnant women with preterm premature rupture of membranes and consecutive early onset neonatal sepsis
Source: BMC Med. 2023 Mar 13;21:92. doi: 10.1186/s12916-023-02805-x (PMC10009945; doi:10.1186/s12916-023-02805-x)
Supplement: Supplementary file 4 — Additional file 4: Table S4. Nucleotide sequences, annotation and sequence count data of all sequence variants determined using Illumina-based amplicon deep-sequencing across 389 samples. [file 12916_2023_2805_MOESM4_ESM.xlsx]

## Sheet: Supplementary Table 4
Supplementary Table 3. Nucleotide sequences, annotation and sequence count data of all sequence variants determined using Illumina-based amplicon deep-sequencing across 389 samples. The sample code indicates the origin (V, vaginal swab; UC, umbilical cord blood; PH, pharyngeal swab; RE, rectal swab; ME, meconium) and , in case of vaginal swabs the time of sampling (V0, collected at the first clin…
Sequence variant	sequence	H01 V0	H02 UC	H02 PH	H02 RE	H02 V0	H02 V1	H02 V2	H03 UC	H03 PHA	H03 PHB	H03 REA	H03 REB	H03 V0	H03 MEA	H03 MEB	H04 UC	H04 RE	H04 V0	H04 V2	H04 ME	H05 UC	H05 PH	H05 RE	H05 V0	H05 V2	H05 ME	H06 UCA	H06 UCB	H06 PHA	H06 PHB	H06 REA	H06 REB	H06 V0	H06 MEA	H06 MEB	H07 RE	H07 V0	H07 V2	H07 ME	H08 UC	H08 PH	H08 RE	H08 V0	H08 V1	H08 V2	H08 ME	H09 RE	H09 V0
1	GATTAACGCTGGCGGCATGCCTAATACATGCAAATCGAACGAAGCCTTTTAGGCTTAGTGGTGAACGGGTGAGTAACACGTATCCAATCTACCCTTAAGTTGGGGATAACTAGTCGAAAGATTAGCTAATACCGAATAATAACATCAATATCGCATGAGAAGATGTAGAAAGTCGCTCTTTGTGGCGACGCTTTTGGATGAGGGTGCGACGTATCAGATAGTTGGTGAGGTAATGGCTCACCAAGTCAATGACGCGTAGCTGTACTGAGAGGTAGAACAGCCACAATGGGACTGAGACACGGCCCAT	0	0	0	0	0	0	392	0	0	0	231	0	11	0	0	0	41	592	1323	6	48	86	52	61	1308	15	0	0	0	0	0	0	0	0	0	36000	12105	14013	54047	11795	15754	41237	506	19962	43629	0	0	5
2	ATTGAACGCTGGCGGCATGCCTTACACATGCAAGTCGAACGGCAGCACGGGAGCAATCCTGGTGGCGAGTGGCGAACGGGTGAGTAATACATCGGAACGTGCCCTGTAGTGGGGGATAACTAGTCGAAAGACTAGCTAATACCGCATACGACCTGAGGGTGAAAGTGGGGGACCGCAAGGCCTCATGCTATAGGAGCGGCCGATGTCTGATTAGCTAGTTGGTGGGGTAAAGGCCTACCAAGGCGACGATCAGTAGCTGGTCTGAGAGGACGATCAGCCACACTGGGACTGAGACACGGCCCAG	0	680	0	452	0	0	3	851	203	541	1081	3501	0	622	1125	2077	102	0	0	6	64	89	22	5	3	245	1199	510	391	1086	584	916	2	1148	901	384	57	141	158	31	168	0	0	0	7	820	1920	0
3	GACGAACGCTGGCGGCGTGCCTAATACATGCAAGTCGAGCGAGTCTGCCTTGAAGATCGGAGTGCTTGCACTCTGTGAAACAAGATACAGGCTAGCGGCGGACGGGTGAGTAACACGTGGGTAACCTGCCCAAGAGATCGGGATAACACCTGGAAACAGATGCTAATACCGGATAACAACAGATGATGCCTATCAACTGTTTAAAAGATGGTTCTGCTATCACTCTTGGATGGACCTGCGGTGCATTAGCTAGTTGGTAGGGTAACGGCCTACCAAGGCGATGATGCATAGCCGAGTTGAGAGACTGATCGGCCACATTGGGACTGAGACACGGCCCAA	0	0	0	4	25995	10	62	0	0	0	0	0	0	0	0	0	167	2	194	347	0	0	0	0	0	162	0	0	0	0	0	0	151	0	0	0	0	0	0	0	156	3	13531	2	0	0	0	0
4	GACGAACGCTGGCGGCGTGCCTAATACATGCAAGTCGAGCGAGCGGAACTAACAGATTTACTTCGGTAATGACGTTAGGAAAGCGAGCGGCGGATGGGTGAGTAACACGTGGGGAACCTGCCCCATAGTCTGGGATACCACTTGGAAACAGGTGCTAATACCGGATAAGAAAGCAGATCGCATGATCAGCTTTTAAAAGGCGGCGTAAGCTGTCGCTATGGGATGGCCCCGCGGTGCATTAGCTAGTTGGTAAGGTAAAGGCTTACCAAGGCGATGATGCATAGCCGAGTTGAGAGACTGATCGGCCACATTGGGACTGAGACACGGCCCAA	0	0	0	0	0	0	39	460	1887	1759	2855	18	17687	304	433	4954	0	8841	3228	0	5962	2547	13807	21090	16439	492	8287	2791	34	140	2909	0	28384	0	0	0	149	383	0	0	0	19	6	0	0	0	29	0
5	GACGAACGCTGGCGGCGTGCCTAATACATGCAAGTCGAGCGAGCGGAACTAACAGATTTACCTCGGTAATGACGTTAGGAAAGCGAGCGGCGGATGGGTGAGTAACACGTGGGGAACCTGCCCCATAGTCTGGGATACCACTTGGAAACAGGTGCTAATACCGGATAAGAAAGCAGATCGCATGATCAGCTTTTAAAAGGCGGCGTAAGCTGTCGCTATGGGATGGCCCCGCGGTGCATTAGCTAGTTGGTAAGGTAAAGGCTTACCAAGGCGATGATGCATAGCCGAGTTGAGAGACTGATCGGCCACATTGGGACTGAGACACGGCCCAA	0	0	0	0	0	0	80	667	3254	0	1376	0	14323	0	5824	29207	0	25949	10507	0	0	0	0	0	0	0	320	0	0	0	0	0	0	0	0	0	0	0	0	0	0	0	0	0	0	0	126	2
6	GATGAACGCTGGCGGCGTGCTTAACACATGCAAGTCGAACGGGATCTGACCAGCTTGCTGGTTGGTGAGAGTGGCGAACGGGTGAGTAATGCGTGACCAACCTGCCCCATGCTCCAGAATAGCTCTTGGAAACGGGTGGTAATGCTGGATGCTCCAACTTGACGCATGTCTTGTTGGGAAAGTGTTTAGTGGCATGGGATGGGGTCGCGTCCTATCAGCTTGTAGGCGGGGTAATGGCCCACCTAGGCTTCGACGGGTAGCCGGCCTGAGAGGGCGGACGGCCACATTGGGACTGAGATACGGCCCAG	0	0	0	200	0	10829	7	0	0	0	0	0	0	0	592	0	54	0	738	111	0	0	0	23	0	0	0	0	0	0	0	0	0	0	0	0	12012	2267	0	0	0	0	0	0	0	0	0	14426
7	GATTAACGCTGGCGGCATGCCTAATACATGCAAATCGAACGAAGCCTTTTAGGCTTAGTGGTGAACGGGTGAGTAACACGTATCCAACCTACCCTTAAGTTGGGGATAACTAGTCGAAAGATTAGCTAATACCGAATAATAACATCAATATCGCATGAGAAGATGTAGAAAGTCGCGTTTGCGACGCTTTTGGATGGGGGTGCGACGTATCAGATAGTTGGTGAGGTAATGGCTCACCAAGTCAATGACGCGTAGCTGTACTGAGAGGTAGAACAGCCACAATGGGACTGAGACACGGCCCAT	0	266	0	0	40	2863	731	0	0	0	0	0	0	0	0	0	0	0	0	0	0	0	0	0	0	0	0	0	0	0	0	0	0	0	0	0	0	0	0	0	0	0	0	0	0	0	0	0
8	GACGAACGCTGGCGGCGTGCCTAATACATGCAAGTCGAGCGAGCTTGCCTATAGAAATTCTTCGGAATGGACATAGATACAAGCTAGCGGCGGATGGGTGAGTAACGCGTGGGTAACCTGCCCTTAAGTCTGGGATACCATTTGGAAACAGATGCTAATACCGGATAAAAGCTACTTTCGCATGAAAGAAGTTTAAAAGGCGGCGTAAGCTGTCGCTAAAGGATGGACCTGCGATGCATTAGCTAGTTGGTAAGGTAACGGCTTACCAAGGCGATGATGCATAGCCGAGTTGAGAGACTGATCGGCCACATTGGGACTGAGACACGGCCCAA	0	0	0	0	0	0	0	0	346	0	1052	0	5159	0	0	0	0	0	0	0	0	0	0	0	0	0	0	0	0	0	0	0	0	0	0	0	0	0	0	0	111	0	10211	0	0	0	0	0
9	GACGAACGCTGGCGGCGTGCCTAATACATGCAAGTCGAGCGAGCGAAACTAACAGATTTACTTCGGTAATGACGTTAGGAAAGCGAGCGGCGGATGGGTGAGTAACACGTGGGGAACCTGCCCCATAGTCTGGGATACCACTTGGAAACAGGTGCTAATACCGGATAAGAAAGCAGATCGCATGATCAGCTTTTAAAAGGCGGCGTAAGCTGTCGCTATGGGATGGCCCCGCGGTGCATTAGCTAGTTGGTAAGGTAAAGGCTTACCAAGGCGATGATGCATAGCCGAGTTGAGAGACTGATCGGCCACATTGGGACTGAGACACGGCCCAA	0	0	0	0	0	0	29	0	1002	0	0	0	0	0	1500	3766	0	3759	2060	0	0	0	0	0	0	0	1957	0	0	0	900	0	7921	0	0	0	0	0	0	0	0	0	0	0	0	0	0	0
10	GACGAACGCTGGCGGCGTGCTTAACACATGCAAGTCGAACGGAAAGGCCCTGCTTTTGTGGGGTGCTCGAGTGGCGAACGGGTGAGTAACACGTGAGTAACCTGCCCTTGACTTTGGGATAACTTCAGGAAACTGGGGCTAATACCGGATAGGAGCTCCTGCTGCATGGTGGGGGTTGGAAAGTTTCGGCGGTTGGGGATGGACTCGCGGCTTATCAGCTTGTTGGTGGGGTAGTGGCTTACCAAGGCTTTGACGGGTAGCCGGCCTGAGAGGGTGACCGGCCACATTGGGACTGAGATACGGCCCAG	0	453	35	439	0	11	0	671	568	1001	1121	6302	4	7746	2238	9504	601	9	6	164	22	122	306	3	24	58	3293	1528	2249	3853	1438	3714	5	1364	2092	20	22	490	0	230	0	21	42	64	12	1570	0	0
11	GATGAACGCTGGCTGTGTGCCTAATACATGCATGTCGAGCGAGGTTAGCAATAACCTAGCGGCGAATGGGTGAGTAACACGTGCTTAATCTACCTTTTAGATTGGAATACCCATTGGAAACAATGGCTAATGCCGGATACGCATGGAACCGCATGGTTCCGTTGTGAAAGGCGCTGTAAGGCGCCACTAAAAGATGAGGGTGCGGAACATTAGTTAGTTGGTGAGGTAATGGCCCACCAAGACTATGATGTTTAGCCGGGTCGAGAGACTGAACGGCCACATTGGGACTGAGATACGGCCCAA	0	0	0	81	2	3567	1493	0	0	0	0	0	0	0	0	0	0	0	0	0	0	0	0	12	4	0	0	0	0	0	0	0	0	0	0	0	0	0	0	0	0	0	0	0	0	0	0	0
12	ATTGAACGCTGGCGGCAGGCCTAACACATGCAAGTCGAACGGTAACAGGAAGAAGCTTGCTTCTTTGCTGACGAGTGGCGGACGGGTGAGTAATGTCTGGGAAACTGCCTGATGGAGGGGGATAACTACTGGAAACGGTAGCTAATACCGCATAACGTCGCAAGACCAAAGAGGGGGACCTTCGGGCCTCTTGCCATCGGATGTGCCCAGATGGGATTAGCTAGTAGGTGGGGTAACGGCTCACCTAGGCGACGATCCCTAGCTGGTCTGAGAGGATGACCAGCCACACTGGAACTGAGACACGGTCCAG	0	10617	15332	3328	0	0	6497	0	0	0	0	0	0	0	0	0	0	0	0	23	25	43	47	0	80	9286	0	0	0	0	0	0	0	0	0	0	0	0	0	0	0	0	0	0	0	0	0	0
13	GATGAACGCTGGCGGCGTGCTTAACACATGCAAGTCGAACGGGATCTAGTCAGCTTGCTGACTGGTGAGAGTGGCGAACGGGTGAGTAATGCGTGACCAACCTGCCCCATGCTCCAGAATAGCTCTTGGAAACGGGTGGTAATGCTGGATGCTCCAACTTGACGCATGTCTTGTTGGGAAAGTGTTTAGTGGCATGGGATGGGGTCGCGTCCTATCAGCTTGTAGGCGGGGTAATGGCCCACCTAGGCTTCGACGGGTAGCCGGCCTGAGAGGGCGGACGGCCACATTGGGACTGAGATACGGCCCAG	0	0	0	0	0	0	0	0	0	0	0	0	0	0	0	0	155	0	0	0	0	0	0	0	0	0	0	0	0	0	0	0	0	47	0	0	0	0	0	0	0	0	0	0	0	0	0	0
14	ATTGAACGCTGGCGGCAGGCCTAACACATGCAAGTCGAACGGTAACAGGAAGCAGCTTGCTGCTTTGCTGACGAGTGGCGGACGGGTGAGTAATGTCTGGGAAACTGCCTGATGGAGGGGGATAACTACTGGAAACGGTAGCTAATACCGCATAACGTCGCAAGACCAAAGAGGGGGACCTTCGGGCCTCTTGCCATCGGATGTGCCCAGATGGGATTAGCTAGTAGGTGGGGTAAAGGCTCACCTAGGCGACGATCCCTAGCTGGTCTGAGAGGATGACCAGCCACACTGGAACTGAGACACGGTCCAG	0	0	0	0	0	0	0	0	0	0	0	0	0	0	0	0	0	0	0	0	0	0	0	0	0	0	0	0	0	0	0	0	3	0	0	0	0	0	0	0	0	0	0	0	0	0	0	0
15	ATTGAACGCTGGCGGCAGGCCTAACACATGCAAGTCGAACGGTAACAGAAAGCAGCTTGCTGCTTTGCTGACGAGTGGCGGACGGGTGAGTAATGTCTGGGAAACTGCCTGATGGAGGGGGATAACTACTGGAAACGGTAGCTAATACCGCATAACGTCGCAAGACCAAAGAGGGGGACCTTCGGGCCTCTTGCCATCGGATGTGCCCAGATGGGATTAGCTAGTAGGTGGGGTAAAGGCTCACCTAGGCGACGATCCCTAGCTGGTCTGAGAGGATGACCAGCCACACTGGAACTGAGACACGGTCCAG	0	0	0	0	0	0	0	0	0	0	0	0	0	0	45	0	0	0	0	0	0	0	0	0	0	0	0	0	0	0	0	0	0	0	0	0	0	0	0	0	0	0	0	0	0	0	0	0
16	GATGAACGCTAGCTATAGGCTTAACACATGCAAGTCGAGGGGCAGCGAATAGATAGCTTGCTATTTATGTCGGCGACCGGCGCACGGGTGAGTAACGCGTATCCAACCTGCCCATAACTAAGGGATAACCCAGCGAAAGTTGGACTAATACCTTATGTATTCGTTTGATCTCATGAGATTACGAATAAAGATTTATCGGTTATGGATGGGGATGCGTCTGATTAGCTTGTTGGCGGGGTAACGGCCCACCAAGGCAACGATCAGTAGGGGTTCTGAGAGGAAGGTCCCCCACATTGGAACTGAGACACGGTCCAA	0	0	0	0	14	0	0	0	0	0	0	0	0	0	0	0	0	0	958	0	0	0	0	8	0	0	0	0	0	0	0	0	0	191	0	0	7	0	0	0	0	0	0	0	0	0	0	0
17	GATGAACGCTGGCGGCGTGCCTAATACATGCAAGTCGAGCGAACAGACGAGGAGCTTGCTCCTCTGACGTTAGCGGCGGACGGGTGAGTAACACGTGGATAACCTACCTATAAGACTGGGATAACTTCGGGAAACCGGAGCTAATACCGGATAATATATTGAACCGCATGGTTCAATAGTGAAAGACGGTTTTGCTGTCACTTATAGATGGATCCGCGCCGCATTAGCTAGTTGGTAAGGTAACGGCTTACCAAGGCAACGATGCGTAGCCGACCTGAGAGGGTGATCGGCCACACTGGAACTGAGACACGGTCCAG	0	0	13	0	641	0	38	0	0	0	377	0	0	0	502	0	6956	6	10	76	0	22	264	0	16	36	351	0	3156	97	3	0	0	51	0	0	363	1873	0	197	0	0	0	88	33	0	262	0
18	GACGAACGCTGGCGGCGTGCCTAATACATGCAAGTCGAGCGAGCGGAACTAACAGATTTACTTCGGTAATGACGTTAGGAAAGCGAGCGGCGGATGGGTGAGTAACACGTGGGGAATCTGCCCCATAGTCTGGGATACCACTTGGAAACAGGTGCTAATACCGGATAAGAAAGCAGATCGCATGATCAGCTTTTAAAAGGCGGCGTAAGCTGTCGCTATGGGATGGCCCCGCGGTGCATTAGCTAGTTGGTAAGGTAAAGGCTTACCAAGGCGATGATGCATAGCCGAGTTGAGAGACTGATCGGCCACATTGGGACTGAGACACGGCCCAA	27828	0	0	0	0	0	0	0	0	0	0	0	0	0	0	0	0	0	0	0	0	0	0	0	0	0	0	0	0	0	0	0	0	0	0	0	0	0	0	0	0	0	0	0	0	0	0	0
19	ATTGAACGCTGGCGGCAGGCCTAACACATGCAAGTCGAACGGTAACAGGAAGCAGCTTGCTGCTTTGCTGACGAGTGGCGGACGGGTGAGTAATGTCTGGGAAACTGCCTGATGGAGGGGGATAACTACTGGAAACGGTAGCTAATACCGCATAACGTCGCAAGACCAAAGAGGGGGACCTTAGGGCCTCTTGCCATCGGATGTGCCCAGATGGGATTAGCTAGTAGGTGGGGTAACGGCTCACCTAGGCGACGATCCCTAGCTGGTCTGAGAGGATGACCAGCCACACTGGAACTGAGACACGGTCCAG	0	0	0	0	0	0	0	0	0	0	0	0	0	0	0	0	0	0	0	0	0	0	0	0	0	0	0	0	0	0	0	0	0	0	0	0	0	0	0	0	0	0	0	0	0	0	0	0
20	GACGAACGCTGGCGGCGTGCCTAATACATGCAAGTAGAACGCTGAAGGAGGAGCTTGCTTCTCCGGATGAGTTGCGAACGGGTGAGTAACGCGTAGGTAACCTGCCTGGTAGCGGGGGATAACTATTGGAAACGATAGCTAATACCGCATAATAGCAGTTGTTGCATGACAGCTGTTTAAAAGGTGCAATTGCACCACTACCAGATGGACCTGCGTTGTATTAGCTAGTTGGTGGGGTAACGGCTCACCAAGGCGACGATACATAGCCGACCTGAGAGGGTGATCGGCCACACTGGGACTGAGACACGGCCCAG	0	0	0	0	0	0	0	0	0	0	0	0	0	0	0	0	0	0	0	0	0	0	0	0	0	0	0	0	0	0	0	0	0	0	0	0	0	0	0	0	0	0	0	0	0	0	0	0
21	GACGAACGCTGGCGGCGTGCCTAATACATGCAAGTCGAGCGAGCGGAACTAACAGATTTACTTCGGCAATGACGTTAGGAAAGCGAGCGGCGGATGGGTGAGTAACACGTGGGGAACCTGCCCCATAGTCTGGGATACCACTTGGAAACAGGTGCTAATACCGGATAAGAAAGCAGATCGCATGATCAGCTTTTAAAAGGCGGCGTAAGCTGTCGCTATGGGATGGCCCCGCGGTGCATTAGCTAGTTGGTAAGGTAAAGGCTTACCAAGGCGATGATGCATAGCCGAGTTGAGAGACTGATCGGCCACATTGGGACTGAGACACGGCCCAA	0	0	0	0	0	6	0	0	0	0	0	0	0	0	0	0	0	0	0	51	6518	2279	14492	22684	14736	274	0	0	0	0	0	0	0	0	0	0	0	0	0	0	0	0	0	0	0	0	59	0
22	GATGAACGCTGGCGGCGCGCCTAACACATGCAAGTCGAACGGTTAAAGCATCTTCGGATGTGTATAAAGTGGCGAACGGCTGAGTAACACGTGGGCAACCTGCCCTTTGCACTGGGATAGCCTCGGGAAACCGAGGTTAATACCGGATACTCCATATTTGTCGCATGGCGAATATGGGAAAGCTCCGGCGGCAAAGGATGGGCCCGCGGCCTGTTAGCTAGTTGGTGGGGTAGTGGCCTACCAAGGCAATGATGGGTAGCCGGGTTGAGAGACCGACCGGCCAGATTGGGACTGAGACACGGCCCAG	0	0	0	0	10	0	0	0	0	0	0	0	0	0	0	0	27	0	0	39	0	0	0	0	0	0	0	0	0	0	0	0	0	0	0	0	0	0	0	0	0	0	0	0	0	0	0	0
23	GACGAACGCTGGCGGCGTGCTTAACACATGCAAGTCGAACGGAAAGGCCCTGCTTGCAGGGTACTCGAGTGGCGAACGGGTGAGTAACACGTGGGTGATCTGCCCTGCACTTCGGGATAAGCCTGGGAAACTGGGTCTAATACCGGATAGGAGCCATTTTTAGTGTGATGGTTGGAAAGTTTTTTCGGTGTAGGATGAGCTCGCGGCCTATCAGCTTGTTGGTGGGGTAATGGCCTACCAAGGCGGCGACGGGTAGCCGGCCTGAGAGGGTGGACGGCCACATTGGGACTGAGATACGGCCCAG	0	312	20	444	12	0	117	548	0	0	0	3	0	0	0	468	0	0	8	19	7	2178	3005	5	161	0	424	0	146	0	0	0	0	0	0	0	265	8817	2	128	52	0	51	79	28	0	1807	0
24	GACGAACGCTGGCGGCGTGCTTAACACATGCAAGTCGAACGGGATCCATTGGTGCTTGCACTTTTGGTGAGAGTGGCGAACGGGTGAGTAACACGTGAGTAACCTGCCCTTTTCTTTGGGATAAGCCTGGGAAACTGGGTCTAATACTGGATGTTCCGGCTTCCTCGCATGGGGTTGTTGGGAAAGGTTTTTTCTGGATTGGGATGGGCTCGCGGCTTATCAGCTTGTTGGTGGGGTGATGGCTTACCAAGGCTTTGACGGGTAGCCGGCCTGAGAGGGTGGTCGGTCACACTGGGACTGAGATACGGCCCAG	0	0	0	0	0	0	0	0	0	0	0	0	0	0	0	0	0	0	0	0	0	0	0	0	0	0	0	0	0	0	0	0	0	0	0	0	8	77	0	0	0	0	0	0	0	0	0	0
25	AACGAACGCCAGCGGCGTGGATTAGGCATGCAAGTCGAACGGACACCGTAGCAATACGGTGTTAGTGGCGGAAGGGTGAGTAATGCATAGATAACCTGCCCCCGAGACCGGGATAACTTCGGGAAACCGAAGCTAAGACCGGATGGGATCGCCGGGTCGCATGGCCTGGTGATTAAAGGAGGCCTCTGAAGATGCTCCCGCTCGGGGAGGGATCTATGTCCTATCAGCTAGTTGGTGAGGGTAACGGCCCACCAAGGCATTGACGGGTAGCCGGCCTTAGCGGGTGTCCGGCCACATTGGGACTGAGACACTGCCCAA	0	1393	7	504	0	3	0	1405	84	1483	176	2129	0	1602	13	0	0	0	3	52	58	183	66	7	0	74	0	3159	1562	338	1538	937	0	203	662	34	8	6	17	41	60	10	6	0	22	2427	187	0
26	GATGAACGCTGGCGGCGTGCTTAACACATGCAAGTCGAACGGGATCCCTGGCAGCTTGCTGTCGGGGTGAGAGTGGCGAACGGGTGAGTAATGCGTGACCAACCTGCCCTGTGCACCGGAATAGCTCCTGGAAACGGGTGGTAATACCGGATGCTCCGCTCCATCGCATGGTGGGGTGGGAAATGCTTTTGCGGCATGGGATGGGGTCGCGTCCTATCAGCTTGTTGGCGGGGTGATGGCCCACCAAGGCGTTGACGGGTAGCCGGCCTGAGAGGGTGACCGGCCACATTGGGACTGAGATACGGCCCAG	0	0	0	0	0	0	0	0	0	0	0	0	0	0	0	0	0	0	0	0	0	0	0	0	0	0	0	0	0	0	0	0	0	0	0	0	0	0	0	0	0	0	0	0	0	0	0	0
27	ATTGAACGCTGGCGGCATGCCTTACACATGCAAGTCGGACGGCAGCGCGGGCTTCGGCCTGGCGGCGAGTGGCGAACGGGTGAGTAATACATCGGAACGTGTCCAGTAGTGGGGGATAGCCCGGCGAAAGCCGGATTAATACCGCATACGATCTGTGGATGAAAGCGGGGGACCTTCGGGCCTCGCGCTACAGGGGCGGCCGATGGCAGATTAGGTAGTTGGTGGGGTAAAGGCCTACCAAGCCGACGATCTGTAGCTGGTCTGAGAGGACGACCAGCCACACTGGGACTGAGACACGGCCCAG	0	0	0	0	0	0	0	0	0	0	0	0	0	0	0	0	0	0	0	0	0	0	28	0	0	0	0	304	0	0	0	0	0	0	0	45	0	4	25	0	0	0	0	0	0	0	182	0
28	GACGAACGCTGGCGGCGTGCTTAACACATGCAAGTCGAACGGTAAGGCTCCAGCTTGCTGGGGTACACGAGTGGCGAACGGGTGAGTAACACGTGGGTGACCTGCCCTGCACTTCGGGATAAGCCTGGGAAACTGGGTCTAATACCGGATAGGACCGCACCGTGAGGGTGTGGTGGAAAGTTTTTTCGGTGTGGGATGGGCCCGCGGCCTATCAGCTTGTTGGTGGGGTAATGGCCTACCAAGGCGGCGACGGGTAGCCGGCCTGAGAGGGTGGACGGCCACATTGGGACTGAGACACGGCCCAG	0	0	0	0	0	0	0	0	0	0	0	0	0	0	0	0	0	0	0	0	0	2960	2149	0	37	0	233	1108	9	0	1226	0	0	0	0	0	0	0	0	90	0	0	0	9	0	0	146	0
29	ATTGAACGCTGGCGGCATGCCTTACACATGCAAGTCGAACGGCAGCATGATCTAGCTTGCTAGATTGATGGCGAGTGGCGAACGGGTGAGTAATACATCGGAACGTGCCCTGTAGTGGGGGATAACTAGTCGAAAGATTAGCTAATACCGCATACGACCTGAGGGTGAAAGTGGGGGACCGCAAGGCCTCATGCTATAGGAGCGGCCGATGTCTGATTAGCTAGTTGGTGGGGTAAAGGCCCACCAAGGCGACGATCAGTAGCTGGTCTGAGAGGACGATCAGCCACACTGGGACTGAGACACGGCCCAG	0	0	10	98	0	0	0	0	71	0	0	0	0	0	0	0	0	0	0	0	35	70	31	0	0	0	0	0	131	231	0	0	0	95	223	138	0	23	67	73	21	0	0	0	0	449	366	4
30	ATTGAACGCTGGCGGCAGGCCTAACACATGCAAGTCGAGCGGTAGAGAGAAGCTTGCTTCTCTTGAGAGCGGCGGACGGGTGAGTAATGCCTAGGAATCTGCCTGGTAGTGGGGGATAACGTCCGGAAACGGACGCTAATACCGCATACGTCCTACGGGAGAAAGCAGGGGACCTTCGGGCCTTGCGCTATCAGATGAGCCTAGGTCGGATTAGCTAGTTGGTGGGGTAATGGCTCACCAAGGCGACGATCCGTAACTGGTCTGAGAGGATGATCAGTCACACTGGAACTGAGACACGGTCCAG	0	670	0	70	0	0	0	120	0	440	0	5	0	0	298	228	0	0	0	0	0	8	0	0	0	0	40	199	0	217	141	0	0	134	287	0	0	0	7	84	51	0	0	0	0	793	0	0
31	ATTGAACGCTGGCGGCAGGCCTAACACATGCAAGTCGAACGGTAACAGAAAGCAGCTTGCTGCTTTGCTGACGAGTGGCGGACGGGTGAGTAATGTCTGGGAAACTGCCCGATGGAGGGGGATAACTACTGGAAACGGTAGCTAATACCGCATAACGTCGCAAGACCAAAGAGGGGGACCTTAGGGCCTCTTGCCATCGGATGTGCCCAGATGGGATTAGCTAGTAGGTGGGGTAAAGGCTCACCTAGGCGACGATCCCTAGCTGGTCTGAGAGGATGACCAGCCACACTGGAACTGAGACACGGTCCAG	0	0	0	0	0	0	0	0	0	0	0	0	0	0	0	0	0	0	0	0	0	0	0	0	0	0	0	0	0	0	0	0	0	0	0	0	0	0	0	0	0	0	0	0	0	0	0	0
32	GACGAACGCTGGCGGCGTGCCTAATACATGCAAGTAGGACGCACAGTTTATACCGTAGCTTGCTACACCATAGACTGTGAGTTGCGAACGGGTGAGTAACGCGTAGGTAACCTACCTATTAGAGGGGGATAACTATTGGAAACGATAGCTAATACCGCATAACAGTATGTAACACATGTTAGATGCTTGAAAGATGCAATTGCATCGCTAGTAGATGGACCTGCGTTGTATTAGCTAGTAGGTAGGGTAATGGCCTACCTAGGCAACGATACATAGCCGACCTGAGAGGGTGATCGGCCACACTGGGACTGAGACACGGCCCAG	0	0	0	0	1199	0	6	0	0	0	0	0	0	0	0	0	0	0	170	0	0	2	66	12	48	0	0	0	1505	0	0	0	4	0	0	0	0	0	0	0	0	0	37	0	0	0	0	3
33	ATTGAACGCTGGCGGCAGGCCTAACACATGCAAGTCGAACGGTAACAGGAAACAGCTTGCTGTTTCGCTGACGAGTGGCGGACGGGTGAGTAATGTCTGGGAAACTGCCTGATGGAGGGGGATAACTACTGGAAACGGTAGCTAATACCGCATAACGTCGCAAGACCAAAGAGGGGGACCTTCGGGCCTCTTGCCATCGGATGTGCCCAGATGGGATTAGCTAGTAGGTGGGGTAACGGCTCACCTAGGCGACGATCCCTAGCTGGTCTGAGAGGATGACCAGCCACACTGGAACTGAGACACGGTCCAG	0	3207	5146	1013	0	0	2222	0	0	0	0	0	0	0	0	0	0	0	0	136	0	15	25	0	36	2866	0	0	0	0	0	0	0	0	0	0	0	0	0	6	0	0	0	0	0	0	0	0
34	GATGAACGCTGGCGGCGTGCCTAATACATGCAAGTCGAGCGAACAGACAAGGAGCTTGCTCCTTTGACGTTAGCGGCGGACGGGTGAGTAACACGTGGGTAACCTACCTATAAGACTGGGATAACTTCGGGAAACCGGAGCTAATACCGGATAATATTTCGAACCGCATGGTTCGATAGTGAAAGATGGTTTTGCTATCACTTATAGATGGACCCGCGCCGTATTAGCTAGTTGGTAAGGTAACGGCTTACCAAGGCGACGATACGTAGCCGACCTGAGAGGGTGATCGGCCACACTGGAACTGAGACACGGTCCAG	0	0	0	6	0	0	16	0	0	0	0	0	0	0	0	0	0	0	0	0	0	153	0	0	0	0	0	0	0	0	0	0	0	0	0	0	0	0	0	0	0	0	0	0	0	0	0	0
35	ATTGAACGCTGGCGGCATGCCTTACACATGCAAGTCGAACGGCAGCACGGGGGCAACCCTGGTGGCGAGTGGCGAACGGGTGAGTAATACATCGGAACGTGTCCAGTAGTGGGGGATAGCCCGGCGAAAGCCGGATTAATACCGCATACGATCTTAGGATGAAAGCGGGGGACCGAAAGGCCTCGCGCTATTGGGGCGGCCGATGGCGGATTAGCTAGTTGGTGGGGTAAAGGCTCACCAAGGCGACGATCCGTAGCTGGTCTGAGAGGACGACCAGCCACACTGGGACTGAGACACGGCCCAG	0	0	0	0	0	0	0	0	0	0	0	0	0	0	0	0	0	0	0	0	0	0	0	0	0	0	0	0	472	0	0	0	0	0	0	116	16	21	30	0	0	7	0	0	0	0	738	0
36	ATTGAACGCTGGCGGCAGGCCTAACACATGCAAGTCGAACGGTAACAGGAAGCAGCTTGCTGCTTTGCTGACGAGTGGCGGACGGGTGAGTAATGTCTGGGAAACTGCCCGATGGAGGGGGATAACTACTGGAAACGGTAGCTAATACCGCATAACGTCGCAAGACCAAAGAGGGGGACCTTAGGGCCTCTTGCCATCGGATGTGCCCAGATGGGATTAGCTAGTAGGTGGGGTAAAGGCTCACCTAGGCGACGATCCCTAGCTGGTCTGAGAGGATGACCAGCCACACTGGAACTGAGACACGGTCCAG	0	0	0	0	0	0	0	0	0	0	0	0	0	0	0	0	0	0	0	0	0	0	0	0	0	0	0	0	0	0	0	0	0	0	0	0	0	0	0	0	0	0	0	0	0	0	0	0
37	ATTGAACGCTGGCGGCAGGCCTAACACATGCAAGTCGAACGGTAACAGGAAACAGCTTGCTGTTTCGCTGACGAGTGGCGGACGGGTGAGTAATGTCTGGGAAACTGCCTGATGGAGGGGGATAACTACTGGAAACGGTAGCTAATACCGCATAACGTCGCAAGACCAAAGAGGGGGACCTTCGGGCCTCTTGCCATCGGATGTGCCCAGATGGGATTAGCTAGTAGGTGGGGTAAAGGCTCACCTAGGCGACGATCCCTAGCTGGTCTGAGAGGATGACCAGCCACACTGGAACTGAGACACGGTCCAG	0	0	0	0	0	0	0	0	0	0	0	0	0	0	0	0	0	0	0	0	0	0	0	0	0	0	0	0	0	0	0	0	0	0	0	0	0	0	0	0	0	0	0	0	0	0	0	0
38	ATTGAACGCTGGCGGCATGCCTTACACATGCAAGTCGAACGGCAGCACGGGAGCAATCCTGGTGGCGAGTGGCGAACGGGTGAGTAATACATCGGAACGTGTCCTGGAGTGGGGGATAGCCCGGCGAAAGCCGGATTAATACCGCATACGCTCTGTGGAGGAAAGGGGGGGATCTTCGGACCTCTCGCTCAAGGGGCGGCCGATGGCAGATTAGCTAGTTGGTGGGGTAAAGGCCTACCAAGGCGACGATCTGTAGCTGGTCTGAGAGGACGACCAGCCACACTGGGACTGAGACACGGCCCAG	0	0	0	0	0	0	0	6	0	0	0	1832	0	0	0	0	0	0	0	0	19	0	0	0	0	0	109	0	0	0	0	0	0	0	327	0	0	0	0	0	0	0	0	0	0	0	82	0
39	ATTGAACGCTGGCGGCATGCCTTACACATGCAAGTCGAACGGCAGCATGATCTAGCTTGCTAGATTGATGGCGAGTGGCGAACGGGTGAGTAATACATCGGAACGTGCCCTGTAGTGGGGGATAACTAGTCGAAAGATTAGCTAATACCGCATACGACCTGAGGGTGAAAGTGGGGGACCGCAAGGCCTCATGCTATAGGAGCGGCCGATGTCTGATTAGCTAGTTGGTGAGGTAAAGGCTCACCAAGGCGACGATCAGTAGCTGGTCTGAGAGGACGATCAGCCACACTGGGACTGAGACACGGCCCAG	0	0	0	0	0	0	0	0	0	0	244	0	0	0	0	0	0	0	0	0	0	0	0	0	0	0	0	0	0	0	0	0	0	46	0	37	0	0	0	392	275	31	11	6	11	2240	121	0
40	GACGAACGCTGGCGGCGTGCCTAATACATGCAAGTCGAGCGAGCGGAACTAACAGATTTACTTCGGTAATGACGTTAGGAAAGCGAGCGGCGGATGGGTGAGTAACACGTGGGAAACCTGCCCCATAGTCTGGGATACCACTTGGAAACAGGTGCTAATACCGGATAAGAAAGCAGATCGCATGATCAGCTTTTAAAAGGCGGCGTAAGCTGTCGCTATGGGATGGCCCCGCGGTGCATTAGCTAGTTGGTAAGGTAAAGGCTTACCAAGGCGATGATGCATAGCCGAGTTGAGAGACTGATCGGCCACATTGGGACTGAGACACGGCCCAA	0	0	0	0	0	0	0	0	0	0	0	0	0	0	0	0	0	0	0	0	0	0	0	0	0	0	0	0	0	0	0	0	0	0	0	0	0	0	0	0	0	0	0	0	0	0	0	0
41	GACGAACGCTGGCGGCGTGCCTAATACATGCAAGTCGAACGCTTCTTTCCTCCCGAGTGCTTGCACTCAATTGGAAAGAGGAGTGGCGGACGGGTGAGTAACACGTGGGTAACCTACCCATCAGAGGGGGATAACACTTGGAAACAGGTGCTAATACCGCATAACAGTTTATGCCGCATGGCATAAGAGTGAAAGGCGCTTTCGGGTGTCGCTGATGGATGGACCCGCGGTGCATTAGCTAGTTGGTGAGGTAACGGCTCACCAAGGCCACGATGCATAGCCGACCTGAGAGGGTGATCGGCCACACTGGGACTGAGACACGGCCCAG	0	0	0	0	19	0	21	0	0	0	0	0	0	0	0	0	0	6	0	0	0	31	0	0	0	11	0	0	0	0	0	0	0	0	0	0	0	0	0	0	0	0	0	0	0	0	2	0
42	GACGAACGCTGGCGGCGTGCCTAATACATGCAAGTCGAGCGAGCTTGCCTAGATGAATTTGGTGCTTGCACCAAATGAAACTAGATACAAGCGAGCGGCGGACGGGTGAGTAACACGTGGGTAACCTGCCCAAGAGACTGGGATAACACCTGGAAACAGATGCTAATACCGGATAACAACACTAGACGCATGTCTAGAGTTTAAAAGATGGTTCTGCTATCACTCTTGGATGGACCTGCGGTGCATTAGCTAGTTGGTAAGGTAACGGCTTACCAAGGCAATGATGCATAGCCGAGTTGAGAGACTGATCGGCCACATTGGGACTGAGACACGGCCCAA	0	0	0	0	0	0	0	0	0	0	0	0	0	0	0	0	0	0	0	38	0	0	0	0	0	40	0	0	0	0	0	0	0	0	0	0	492	206	0	0	0	0	0	0	0	0	0	7313
43	ATTGAACGCTGGCGGCAGGCCTAACACATGCAAGTCGAACGGTAACAGAAAGCAGCTTGCTGCTTTGCTGACGAGTGGCGGACGGGTGAGTAATGTCTGGGAAACTGCCTGATGGAGGGGGATAACTACTGGAAACGGTAGCTAATACCGCATAACGTCGCAAGACCAAAGAGGGGGACCTTAGGGCCTCTTGCCATCGGATGTGCCCAGATGGGATTAGCTAGTAGGTGGGGTAAAGGCTCACCTAGGCGACGATCCCTAGCTGGTCTGAGAGGATGACCAGCCACACTGGAACTGAGACACGGTCCAG	0	0	0	0	0	0	0	0	0	0	0	0	0	0	0	0	0	0	0	0	0	0	0	0	0	0	0	0	0	0	0	0	0	0	0	0	0	0	0	0	0	0	0	0	0	0	0	0
44	ATTGAACGCTGGCGGCATGCCTTACACATGCAAGTCGAACGGCAGCACGGGGGCAACCCTGGTGGCGAGTGGCGAACGGGTGAGTAATACATCGGAACGTGTCCTGGAGTGGGGGATAGCCCGGCGAAAGCCGGATTAATACCGCATACGCTCTGTGGAGGAAAGGGGGGGATCTTCGGACCTCTCGCTCAAGGGGCGGCCGATGGCAGATTAGCTAGTTGGTGGGGTAAAGGCCTACCAAGGCGACGATCTGTAGCTGGTCTGAGAGGACGACCAGCCACACTGGGACTGAGACACGGCCCAG	0	0	0	0	0	0	0	0	0	0	0	0	0	0	3	0	0	0	0	0	0	32	0	0	0	19	0	646	661	0	0	0	0	0	100	0	0	0	0	0	0	4	5	0	0	366	0	0
45	GATGAACGCTGGCGGCGTGCTTAACACATGCAAGTCGAACGGGATCCATCGGGCTTTGCTTGGTGGTGAGAGTGGCGAACGGGTGAGTAATGCGTGACCGACCTGCCCCATGCACCGGAATAGCTCCTGGAAACGGGTGGTAATGCCGGATGTTCCAGTTGATCGCATGGTCTTCTGGGAAAGCTTTCGCGGTATGGGATGGGGTCGCGTCCTATCAGCTTGACGGCGGGGTAACGGCCCACCGTGGCTTCGACGGGTAGCCGGCCTGAGAGGGCGACCGGCCACATTGGGACTGAGATACGGCCCAG	0	0	0	0	0	0	0	0	0	0	0	0	0	0	0	0	0	0	0	0	0	0	0	0	0	0	0	0	0	0	0	0	0	0	0	0	0	0	0	0	0	0	0	0	0	0	0	0
46	AACGAACGCCAGCGGCGTGGATTAGGCATGCAAGTCGAACGTGATCCGTAGCAATACGGTGAAAGTGGCGGAAGGGTGAGTAATGCCTAGATAACCTACCTCAGAGACTGGGATAACTCCGGGAAACTGGAGCTAATACCGGATGGGATCGCGGGGTCACATGGTTCTGCGATTAAAGGTGCCCTCTGAATATGGTAGCACTCTGAGAGGGGTCTAGGTCCTATCAGCTAGTTGGTGAGGGTAACGGCCCACCAAGGCTTTGACGGGTAGCCGGCCTTAGCGGGTGTCCGGCCACATTGGGACTGAGACACTGCCCAA	0	0	13	131	0	0	0	196	162	0	3115	2718	0	322	1136	1603	0	8	0	72	67	184	101	0	0	52	312	571	2527	426	1133	2397	2	455	485	0	0	0	0	0	0	49	0	0	14	73	0	0
47	GACGAACGCTGGCGGCGTGCTTAACACATGCAAGTCGAACGGAAAGGCTCCTTGCTTGCAAGGGGTACTCGAGTGGCGAACGGGTGAGTAACACGTGGGTGATCTGCCTTGCACTTCGGGATAAGCCTGGGAAACTGGGTCTAATACCGGATAGGACCATGCTTTAGTGTGTGTGGTGGAAAGTTTTTCGGTGCAAGATGAGCCCGCGGCCTATCAGCTTGTTGGTGGGGTAATGGCCTACCAAGGCGACGACGGGTAGCCGGCCTGAGAGGGTGTACGGCCACATTGGGACTGAGACACGGCCCAG	0	0	0	0	0	0	0	0	0	0	0	0	0	0	0	0	0	0	0	0	0	0	0	0	0	0	0	0	0	0	0	0	0	0	0	0	0	0	0	0	0	0	0	0	0	0	0	0
48	AACGAACGCTGGCGGCGTGCTTAACACATGCAAGTCGCGTGCGCAGTTCCGTAGCAATACGGGATCGGCGCACGGCGCACGGGTGCGTAACACGTGGGCAATCTGCCCTCTGATGGGGAATAACCCCGCGAAAGCGGGGCTAATACCGCATAAGATTCCTTGGACGATGGTCCGAGGATTGAAAGCAGTGATGCGTCGGAGGAGGAGCCCGCGCCCGATTAGCTAGTTGGTGAGGTAATGGCTCACCAAGGCAATGATCGGTAGCTGGTCTGAGAGGATGATCAGCCACACTGGAACTGAGACACGGTCCAG	0	0	10	553	0	0	0	635	50	2451	1112	1294	0	408	607	1246	277	0	0	90	31	83	43	0	0	40	0	1337	5	335	538	1364	0	742	0	0	0	0	4	59	35	24	0	3	33	631	35	0
49	GATGAACGCTGACAGAATGCTTAACACATGCAAGTCAACTTGAATTTGGGTTTTTAACTTAGATTTGGGTGGCGGACGGGTGAGTAACGCGTAAAGAACTTGCCTCACAGCTAGGGACAACATTTAGAAATGAATGCTAATACCTGATATTATGATTTTAAGGCATCTTAGAATTATGAAAGCTATAAGCACTGTGAGAGAGCTTTGCGTCCCATTAGCTAGTTGGAGAGGTAACAGCTCACCAAGGCGATGATGGGTAGCCGGCCTGAGAGGGTGAACGGCCACAAGGGGACTGAGACACGGCCCTT	0	0	0	0	0	0	0	0	0	0	0	0	0	0	0	0	0	0	62	0	0	0	0	2	39	0	0	0	0	0	0	0	0	0	0	0	0	0	0	0	21	0	1973	0	0	0	0	0
50	GATGAACGCTGGCGGCGTGCTTAACACATGCAAGTCGAACGGGATCCCTGGCGCTTGCGCCGGGGTGAGAGTGGCGAACGGGTGAGTAATGCGTGACCAACCTGCCCCATGCACCGGAATAGCTCCTGGAAACGGGTGGTAATGCCGGATGCTCCAGATGACCGCATGGGATTCTGGGAAAGCTTTTGCGGCATGGGATGGGGTCGCGTCCTATCAGCTTGTTGGTGGGGTGATGGCCCACCAAGGCTTCGACGGGTAGCCGGCCTGAGAGGGCGACCGGCCACATTGGGACTGAGATACGGCCCAG	0	0	0	0	0	0	0	0	0	0	0	0	0	0	0	0	0	0	0	0	0	0	0	0	0	47	0	0	0	0	0	0	0	0	0	0	0	0	0	0	0	0	0	0	0	0	0	0
51	GATGAACGCTGGCGGCGTGCCTAATACATGCAAGTCGAGCGAACAGACGAGGAGCTTGCTCCTTTGACGTTAGCGGCGGACGGGTGAGTAACACGTAGGTAACCTACCTATAAGACTGGGATAACTTCGGGAAACCGGAGCTAATACCGGATAATATTTCGAACCGCATGGTTCGATAGTGAAAGATGGCTTTGCTATCACTTATAGATGGACCTGCGCCGTATTAGCTAGTTGGTAAGGTAACGGCTTACCAAGGCAACGATACGTAGCCGACCTGAGAGGGTGATCGGCCACACTGGAACTGAGACACGGTCCAG	0	0	0	0	82	0	0	0	0	0	151	0	6	0	0	0	0	0	6	0	0	449	1358	26	167	13	0	0	0	196	0	0	0	125	0	0	195	597	0	351	0	0	9	231	0	0	358	0
52	GATGAACGCTGGCGGCGTGCTTAACACATGCAAGTCGAACGGAAAGGCCTCAGCTTGCTGGGGTGCTCGAGTGGCGAACGGGTGAGTAACACGTAGGTGATCTGCCTTTCACTTCGGGATAAGCTTGGGAAACTGGGTCTAATACCGGATATTCACGGCACCGTGGTTGGTGTGGTGGAAAGCTTTTGCGGTGGGAGATGAGCTTGCGGCCTATCAGCTTGTTGGTGGGGTAATGGCCTACCAAGGCGGCGACGGGTAGCCGGCCTGAGAGGGTGTGCGGCCACATTGGGACTGAGATACGGCCCAG	0	0	0	0	0	0	0	0	0	0	0	0	0	0	0	0	0	0	19	0	0	0	0	0	0	0	0	0	0	0	0	0	0	0	0	0	0	0	0	0	0	0	0	0	0	0	0	0
53	GACGAACGCTGGCGGCGTGCTTAACACATGCAAGTCGAACGGAAAGGCCCTGCTTGCAGGGTACTCGAGTGGCGAACGGGTGAGTAACACGTGGGTGATCTGCCCTGCACTTCGGGATAAGCCTGGGAAACTGGGTCTAATACCGGATAGGAGCCATTTTTAGTGTGATGGTTGGAAAGTTTTTCGGTGTAGGATGAGCTCGCGGCCTATCAGCTTGTTGGTGGGGTAATGGCCTACCAAGGCGGCGACGGGTAGCCGGCCTGAGAGGGTGGACGGCCACATTGGGACTGAGATACGGCCCAG	0	0	0	0	0	0	0	0	0	0	0	0	0	0	0	0	0	0	0	0	0	0	0	0	0	0	0	0	0	0	0	0	0	0	0	0	0	0	0	0	0	0	0	0	0	0	0	0
54	GATGAACGCTAGCTACAGGCTTAACACATGCAAGTCGCAGGGTAACATGAGGAAAGCTTGCTTTCCTTGATGACGACTGGCGCACGGGTGAGTAACGCGTATCCAACCTTCCCATAACTACGGGATAACCCGTTGAAAGACGGCCTAATACCGTATGATATCGTTTGCTGACATCAAATAACGATTAAAGGTTTAGCGGTTATGGATGGGGATGCGTCTGATTAGCTTGTTGGCGGGGTAACGGCCCACCAAGGCGACGATCAGTAGGGGTTCTGAGAGGAAGGTCCCCCACATTGGAACTGAGACACGGTCCAA	0	0	0	0	0	0	0	0	0	0	0	0	0	0	0	0	0	0	1147	0	0	0	0	0	0	0	0	0	0	0	0	0	0	0	0	0	42	51	0	146	0	0	473	0	0	0	0	0
55	GATGAACGCTAGCTATAGGCTTAACACATGCAAGTCGAGGGGCAGCGAATAGATAGCTTGCTATTTATGTCGGCGACCGGCGCACGGGTGAGTAACGCGTATCCAACCTACCCATAACTAAGGGATAACCCAGCGAAAGTTGGACTAATACCTTATGTATTCGTTTGATCTCATGAGATTACGAATAAAGATTTATCGGTTATGGATGGGGATGCGTCTGATTAGCTTGTTGGCGGGGTAACGGCCCACCAAGGCAACGATCAGTAGGGGTTCTGAGAGGAAGGTCCCCCACATTGGAACTGAGACACGGTCCAA	0	0	0	0	0	0	0	0	0	0	0	0	0	0	0	0	0	0	0	0	0	0	59	0	37	0	0	0	0	0	0	0	0	0	0	0	0	0	0	0	0	0	0	0	0	0	0	0
56	GACGAACGCTGGCGGCGTGCCTAATACATGCAAGTCGAGCGAGCTGAACCAACAGATTCACTTCGGTGATGACGTTGGGAACGCGAGCGGCGGATGGGTGAGTAACACGTGGGGAACCTGCCCCATAGTCTGGGATACCACTTGGAAACAGGTGCTAATACCGGATAAGAAAGCAGATCGCATGATCAGCTTATAAAAGGCGGCGTAAGCTGTCGCTATGGGATGGCCCCGCGGTGCATTAGCTAGTTGGTAGGGTAACGGCCTACCAAGGCAATGATGCATAGCCGAGTTGAGAGACTGATCGGCCACATTGGGACTGAGACACGGCCCAA	0	0	0	0	0	0	0	0	0	0	0	0	0	0	0	0	0	0	0	51	0	0	0	0	0	23	0	0	0	0	0	0	0	0	0	0	0	0	0	0	0	0	0	0	0	0	0	0
57	GATAAACGCTGACAGAATGCTTAACACATGCAAGTCTATGAGGAAGTTTAGCTTGCTAAATGGACTCATGGCGGACGGGTGAGTAACGCGTAAAGAACTTGCCCTTTAGACTGGGATAACAGAGGGAAACTTCTGATAATACTGGATAAGTTAGTATATCGCATGATATGCAAATGAAAGCTACGGCACTAAAGGAGAGCTTTGCGTCCTATTAGCTAGTTGGTAAGGTAAGAGCTTACCAAGGCGATGATAGGTAGCCGGCCTGAGAGGGTGGACGGCCACAAGGGGACTGAGATACGGCCCTT	0	0	0	0	87	0	0	0	0	0	0	0	0	0	0	0	0	0	0	0	0	0	0	0	0	0	0	0	0	0	0	0	0	0	0	0	0	0	0	0	0	0	0	0	0	0	0	0
58	GACGAACGCTGGCGGCGTGCCTAATACATGCAAGTCGAGCGAGCGGAACTAACAGATTTACTTCGGTAATGACGTTAGGAAAGCGAGCGGCGGATGGGTGAGTAACACGTGGGGAACCTGCCCCATGGTCTGGGATACCACTTGGAAACAGGTGCTAATACCGGATAAGAAAGCAGATCGCATGATCAGCTTTTAAAAGGCGGCGTAAGCTGTCGCTATGGGATGGCCCCGCGGTGCATTAGCTAGTTGGCAAGGTAAAGGCTTACCAAGGCGATGATGCATAGCCGAGTTGAGAGACTGATCGGCCACATTGGGACTGAGACACGGCCCAA	0	0	0	0	0	0	0	0	0	0	0	0	0	0	0	0	0	0	0	0	0	0	0	0	0	0	0	0	0	0	0	0	0	0	0	0	0	0	0	0	0	0	0	0	0	0	0	0
59	GATTAACGCTAGCGGTATGCCTAATACATGCAAGTCGAGCGGAGGTAGCAATACCTTAGCGGCGAACGGGTGAGTAATACGTATCTAATCTGCCCTTTAGAAAGGAACAACAGATCGAAAGATTTGCTAATACCTTATATGATATACATTCGCATGAAAGTATATTTAAAGTTGCGTTTGCAACGCTTTAGGATGAGGGTGCGGTTTATCAGATAGTTGGTGAGGTAATGGCTCACCAAGTCAATGACGAATAGCTATGCTGAGAGGTAGAATAGCCACAAGGGGACTGAGACACGGCCCCT	0	0	0	0	0	0	0	0	0	0	0	0	0	0	0	0	0	0	0	0	0	0	0	0	0	0	0	0	0	0	0	0	0	0	0	0	0	0	0	0	0	0	0	0	0	0	0	0
60	ATTGAACGCTGGCGGCAGGCCTAACACATGCAAGTCGAACGGTAACAGGAAGAAGCTTGCTTCTTTGCTGACGAGTGGCGGACGGGTGAGTAATGTCTGGGAAACTGCCTGATGGAGGGGGATAACTACTGGAAACGGTAGCTAATACCGCATAACGTCGCAAGACCAAAGAGGGGGACCTTCGGGCCTCTTGCCATCGGATGTGCCCAGATGGGATTAGCTTGTTGGTGGGGTAACGGCTCACCAAGGCGACGATCCCTAGCTGGTCTGAGAGGATGACCAGCCACACTGGAACTGAGACACGGTCCAG	0	0	0	0	0	0	0	0	0	0	0	0	0	0	0	0	0	0	0	0	0	0	0	0	0	0	0	0	0	0	0	0	0	0	0	0	0	0	0	0	0	0	0	0	0	0	0	0
61	GACGAACGCTGGCGGCGTGCCTAATACATGCAAGTCGAGCGAGCGAAACTAACAGATTTACTTCGGTAATGACGTTAGGAAAGCGAGCGGCGGATGGGTGAGTAACACGTGGGGAACCTGCCCCATAGTCTGGGATACCACTTGGAAACAGGTGCTAATACCGGATAAGAAAGCAGATCGCATGATCAGCTTTTAAAAGGCGGCGTAAGCTGTCGCTATGGGATGGCCCCGCGGTGCATTAGCTAGTTGGCAAGGTAAAGGCTTACCAAGGCGATGATGCATAGCCGAGTTGAGAGACTGATCGGCCACATTGGGACTGAGACACGGCCCAA	0	0	0	0	0	0	0	0	0	0	0	0	0	0	0	0	0	0	0	0	0	0	0	0	0	0	0	0	0	0	0	0	0	0	0	0	0	0	0	0	0	0	0	0	0	0	0	0
62	GACGAACGCTGGCGGCGTGCTTAACACATGCAAGTCGAACGGGATCCTTTCTAGCTTGCTAGGGGGGTGAGAGTGGCGAACGGGTGAGTAACGCGTGATTAACCTGCCGTGTAGTTTGGAATAGCTCCTGGAAACGGGTGGTAATGCCGAATGTTCCACATGCTCGCATGGGTGTGTGGGAAAACGTTTTAGTGCTATGCGATGGGATCGCGTCCTATCAGCTTGTTGGTGGGGTAGTGGCCTACCAAGGCTTCGACGGGTAGCCGGCCTGAGAGGGCGACCGGCCACATTGGGACTGAGATACGGCCCAG	0	0	0	0	0	0	0	0	0	0	0	0	0	0	0	0	0	0	0	47	0	0	0	0	0	24	0	0	0	0	0	0	0	0	0	0	0	0	0	0	0	0	60	0	6	0	0	0
63	ATTGAACGCTGGCGGCAGGCCTAACACATGCAAGTCGAACGGTAACAGGAAACAGCTTGCTGTTTCGCTGACGAGTGGCGGACGGGTGAGTAATGTCTGGGAAACTGCCCGATGGAGGGGGATAACTACTGGAAACGGTAGCTAATACCGCATAACGTCGCAAGACCAAAGAGGGGGACCTTAGGGCCTCTTGCCATCGGATGTGCCCAGATGGGATTAGCTAGTAGGTGGGGTAAAGGCTCACCTAGGCGACGATCCCTAGCTGGTCTGAGAGGATGACCAGCCACACTGGAACTGAGACACGGTCCAG	0	0	0	0	0	0	0	0	0	0	0	0	0	0	0	0	0	0	0	0	0	0	0	0	0	0	0	0	0	0	0	0	0	0	0	0	0	0	0	0	0	0	0	0	0	0	0	0
64	ATTGAACGCTGGCGGCAGGCCTAACACATGCAAGTCGAACGGTAACAGGAAGCAGCTTGCTGCTTTGCTGACGAGTGGCGGACGGGTGAGTAATGTCTGGGAAACTGCCTGATGGAGGGGGATAACTACTGGAAACGGTAGCTAATACCGCATAACGTCGCAAGACCAAAGAGGGGGACCTTAGGGCCTCTTGCCATCGGATGTGCCCAGATGGGATTAGCTAGTAGGTGGGGTAAAGGCTCACCTAGGCGACGATCCCTAGCTGGTCTGAGAGGATGACCAGCCACACTGGAACTGAGACACGGTCCAG	0	0	0	0	0	0	0	0	0	0	0	0	0	0	0	0	0	0	0	0	0	0	0	0	0	0	0	0	0	0	0	0	0	0	0	0	0	0	0	0	0	0	0	0	0	0	0	0
65	GATGAACGCTAGCTACAGGCTTAACACATGCAAGTCGAGGGGAAACGGCATTGAGTGCTTGCACTCTTTGGACGTCGACCGGCGCACGGGTGAGTAACGCGTATCCAACCTTCCCATTACTGTGGGATAACCTGCCGAAAGGCAGACTAATACCGCATAGTCTTCGATGACGGCATCAGATTTGAAGTAAAGATTTATCGGTAATGGATGGGGATGCGTCTGATTAGCTTGTTGGCGGGGTAACGGCCCACCAAGGCGACGATCAGTAGGGGTTCTGAGAGGAAGGTCCCCCACATTGGAACTGAGACACGGTCCAA	0	0	0	1929	17	20761	5	0	0	0	0	0	0	0	650	0	0	0	0	0	14	0	0	37	0	0	0	0	0	0	0	0	0	0	0	0	0	0	0	0	0	0	0	0	0	0	0	0
66	ATTGAACGCTGGCGGCATGCTTTACACATGCAAGTCGAACGGCAACGAGGAGAAGCTTGCTTCTCTGTCGGCGAGTGGCGAACGGGTGAGTATAGCATCGGAACGTGCCAAGTAGTGGGGGATAACCAAACGAAAGTTTGGCTAATACCGCGTAAGCTCCAAGGAGGAAAGTAGGGGACCTAAATAAGGCCTTACGCTATTTGATCGGCCGATGTCGGATTAGCTAGTTGGTGGGGTAATGGCTCACCAAGGCAATGATCCGTAGCGGGTCTGAGAGGACGATCCGCCACACTGGGACTGAGACACGGCCCAG	0	0	0	0	0	0	0	0	0	0	0	0	0	215	0	0	0	0	0	0	0	0	0	0	0	0	0	0	0	0	0	0	0	0	0	0	0	0	0	0	0	0	0	0	0	0	0	0
67	GATGAACGCTAGCTACAGGCTTAACACATGCAAGTCGCAGGGTAACATGAGGAAAGCTTGCTTTCCTTGATGACGACTGGCGCACGGGTGAGTAACGCGTATCCAACCTTCCCATAACTACGGGATAACCCGTTGAAAGACGGCCTAATACCGTATGATATCGTTTGCTGACATCAAATAACGATTAAAGGTTTAGCGGTTATGGATGGGGATGCGTCTGATTAGCTTGTTGGCGGGGTAACGGCCCACCAAGGCAACGATCAGTAGGGGTTCTGAGAGGAAGGTCCCCCACATTGGAACTGAGACACGGTCCAA	0	0	0	0	0	0	0	0	0	0	0	0	0	0	0	0	0	0	0	0	0	0	0	0	0	0	0	0	706	0	0	0	0	0	0	0	0	23	2	0	0	0	0	0	0	0	0	0
68	GACGAACGCTGGCGGCGTGCTTAACACATGCAAGTCGAACGGGATTTAGTAGACAGAAACCTCGGTGGAAGATTACTAATGAGAGTGGCGAACGGGTGAGTAACGCGTGAGCAACCTGCCTATGACAGTGGGATAGCCTCGGGAAACCGGGATTAATACCGCATAAAATCGTAGAAACACATGTTTCAACGGTCAAAGATTTATCGGTCATAGATGGGCTCGCGTCTGATTAGCTAGTTGGTGAGATAACAGCCCACCAAGGCGACGATCAGTAGCCGGTCTGAGAGGATGAACGGCCACATTGGAACTGAGACACGGTCCAA	0	0	0	0	0	0	98	0	0	0	0	0	0	0	0	0	0	0	1121	0	0	0	0	0	0	0	0	0	0	0	0	0	0	0	0	0	62	423	0	0	0	0	69	0	0	0	72	0
69	ATTGAACGCTGGCGGCATGCCTTACACATGCAAGTCGGACGGCAGCGCGGGCTTCGGCCTGGCGGCGAGTGGCGAACGGGTGAGTAATACATCGGAACATGTCCAGTAGTGGGGGATAGCCCGGCGAAAGCCGGATTAATACCGCATACGATCCATGGATGAAAGCGGGGGACCGAAAGGCCTCGCGCTATTGGGGTGGCCGATGGCGGATTAGCTAGTTGGTGGGGTAAAGGCCTACCAAGGCGACGATCCGTAGCTGGTCTGAGAGGACGACCAGCCACACTGGGACTGAGACACGGCCCAG	0	0	0	0	0	0	0	0	0	0	0	0	0	0	0	0	0	0	0	0	0	0	0	0	0	0	0	0	0	0	0	0	0	0	0	118	0	10	38	0	0	0	0	0	0	0	202	0
70	ATTGAACGCTGGCGGCAGGCCTAACACATGCAAGTCGAACGGTAACAGGAAGAAGCTTGCTTCTTTGCTGACGAGTGGCGGACGGGTGAGTAATGTCTGGGAAACTGCCTGATGGAGGGGGATAACTACTGGAAACGGTAGCTAATACCGCATAATGTCGCAAGACCAAAGAGGGGGACCTTCGGGCCTCTTGCCATCGGATGTGCCCAGATGGGATTAGCTAGTAGGTGGGGTAACGGCTCACCTAGGCGACGATCCCTAGCTGGTCTGAGAGGATGACCAGCCACACTGGAACTGAGACACGGTCCAG	0	3055	4502	1249	0	0	1837	0	0	0	0	0	0	0	0	0	0	0	0	0	0	0	27	0	0	0	0	0	0	0	0	0	0	0	0	0	0	0	0	0	0	0	0	0	0	0	0	0
71	ATTGAACGCTGGCGGCAGGCCTAACACATGCAAGTCGAACGGTAACAGGAAACAGCTTGCTGTTTCGCTGACGAGTGGCGGACGGGTGAGTAATGTCTGGGAAACTGCCTGATGGAGGGGGATAACTACTGGAAACGGTAGCTAATACCGCATAATGTCGCAAGACCAAAGAGGGGGACCTTCGGGCCTCTTGCCATCGGATGTGCCCAGATGGGATTAGCTAGTAGGTGGGGTAACGGCTCACCTAGGCGACGATCCCTAGCTGGTCTGAGAGGATGACCAGCCACACTGGAACTGAGACACGGTCCAG	0	0	65	0	0	0	63	0	0	0	0	0	0	0	0	0	0	0	0	0	0	0	33	0	0	2151	0	0	0	0	0	0	0	0	0	0	0	0	0	0	0	0	0	0	0	0	0	0
72	AGTGAACGCTGGCGGTAGGCCTAACACATGCAAGTCGAACGGCAGCACAGGAGAGCTTGCTCTCTGGGTGGCGAGTGGCGGACGGGTGAGGAATACATCGGAATCTACTTTTTCGTGGGGGATAACGTAGGGAAACTTACGCTAATACCGCATACGACCTACGGGTGAAAGCAGGGGATCTTCGGACCTTGCGCGATTGAATGAGCCGATGTCGGATTAGCTAGTTGGCGGGGTAAAGGCCCACCAAGGCGACGATCCGTAGCTGGTCTGAGAGGATGATCAGCCACACTGGAACTGAGACACGGTCCAG	0	0	0	0	0	0	0	187	0	947	129	9	0	169	630	383	0	0	0	0	0	0	0	0	0	11	58	0	0	0	0	0	0	0	0	0	0	0	0	48	0	14	0	0	0	0	0	0
73	GATGAACGCTGGCGGCGTGCTTAACACATGCAAGTCGAACGGAAAGGCCAGTGCTTGCACTGGTGCTCGAGTGGCGAACGGGTGAGTAACACGTGAGTGATCTGCCCTGCACTTTGGGATAAGCCTGGGAAACTGGGTCTAATACCGGATAGGACCATGCTTTAGATGGTGTGGTGGAAAGTTTTTTCGGTGTGGGATGAGCTTGCGGCCTATCAGCTTGTTGGTGGGGTAATGGCCTACCAAGGCGTCGACGGGTAGCCGGCCTGAGAGGGTGTACGGCCACATTGGGACTGAGATACGGCCCAG	0	0	0	0	0	0	0	0	0	0	0	0	0	0	0	0	0	0	0	0	0	0	0	0	0	0	0	0	0	0	603	0	0	0	0	0	0	0	0	85	0	6	0	0	0	0	0	0
74	GACGAACGCTGGCGGCGTGCTTAACACATGCAAGTCGAACGAGAGGACATGGGAAGCTTGCTTCCTATGAAATCGAGTGGCAAACGGGTGAGTAACGCGTAAACAACCTGCCCTTCGGATGGGGATAACAGCCGGAAACGGCTGCTAATACCGAATACGATCTTTTCGTCGCATGACGGAAAGAAGAAAGGATGGCCTCTATACAAAGCTATCGCCGAAGGAGGGGTTTGCGTCTGATTAGCTGGTTGGAGGGGTAACGGCCCAACAAGGCGATGATCAGTAGCCGGTCTGAGAGGATGAACGGCCACATTGGGACTGAGACACGGCCCAG	0	0	0	0	0	0	0	0	0	0	545	0	0	0	0	0	0	0	0	0	0	0	0	0	0	0	0	0	0	0	0	0	0	0	0	0	0	0	0	0	0	0	0	0	0	0	0	0
75	ATTGAACGCTGGCGGCAGGCCTAACACATGCAAGTCGAACGGTAACAGAAAGCAGCTTGCTGCTTTGCTGACGAGTGGCGGACGGGTGAGTAATGTCTGGGAAACTGCCCGATGGAGGGGGATAACTACTGGAAACGGTAGCTAATACCGCATAACGTCGCAAGACCAAAGAGGGGGACCTTCGGGCCTCTTGCCATCGGATGTGCCCAGATGGGATTAGCTAGTAGGTGGGGTAAAGGCTCACCTAGGCGACGATCCCTAGCTGGTCTGAGAGGATGACCAGCCACACTGGAACTGAGACACGGTCCAG	0	0	0	0	0	0	0	0	0	0	0	0	0	0	0	0	0	0	0	0	0	0	0	0	0	0	0	0	0	0	0	0	0	0	0	0	0	0	0	0	0	0	0	0	0	0	0	0
76	GATTAACGCTGGCGGCATGCCTAATACATGCAAATCGAACGAAGTCTTTTAGGCTTAGTGGTGAACGGGTGAGTAACACGTATCCAATCTACCCTTAAGTTGGGGATAACTAGTCGAAAGATTAGCTAATACCGAATAATAACATCAATATCGCATGAGAAGATGTAGAAAGTCGCTCTTTGTGGCGACGCTTTTGGATGAGGGTGCGACGTATCAGATAGTTGGTGAGGTAATGGCTCACCAAGTCAATGACGCGTAGCTGTACTGAGAGGTAGAACAGCCACAATGGGACTGAGACACGGCCCAT	0	0	0	0	0	0	0	0	0	0	0	0	0	0	0	0	0	0	0	0	0	0	0	0	0	0	0	0	0	0	0	0	0	0	0	0	0	0	0	0	0	0	0	0	0	0	0	0
77	GATGAACGCTAGCTACAGGCTTAACACATGCAAGTCGCAGGGTAACATGAGGAAAGCTTGCTTTCCTTGATGACGACTGGCGCACGGGTGAGTAACGCGTATCCAACCTTCCCATAACTACGGGATAACCCGTTGAAAGACGGCCTAATACCGTATGACATCGTTTGCTGACATCAAATAACGATTAAAGGTTTAGCGGTTATGGATGGGGATGCGTCTGATTAGCTTGTTGGCGGGGTAACGGCCCACCAAGGCGACGATCAGTAGGGGTTCTGAGAGGAAGGTCCCCCACATTGGAACTGAGACACGGTCCAA	0	0	0	0	0	0	0	0	0	0	0	0	0	0	0	0	0	0	0	0	0	0	0	0	0	0	0	0	0	0	0	0	0	0	0	0	0	0	0	0	0	0	0	0	0	0	0	0
78	ATTGAACGCTGGCGGCATGCTTTACACATGCAAGTCGGACGGCAGCACAGAGAAGCTTGCTTCTTGGGTGGCGAGTGGCGAACGGGTGAGTAACATATCGGAACGTACCGAGTAATGGGGGATAACTAATCGAAAGATTAGCTAATACCGCATATTCTCTGAGGAGGAAAGCAGGGGACCTTCGGGCCTTGCGTTATTCGAGCGGCCGATATCTGATTAGCTAGTTGGTGGGGTAAAGGCCTACCAAGGCGACGATCAGTAGCGGGTCTGAGAGGATGATCCGCCACACTGGGACTGAGACACGGCCCAG	0	0	6	0	0	0	0	0	0	0	0	0	0	0	0	0	0	0	0	0	0	0	0	0	0	0	0	0	0	0	0	0	0	0	0	0	0	0	0	0	0	0	0	0	0	0	0	0
79	ATTGAACGCTGGCGGCATGCCTTACACATGCAAGTCGGACGGCAGCGCGGGAGCAATCCTGGCGGCGAGTGGCGAACGGGTGAGTAATACATCGGAACATGTCCAGTAGTGGGGGATAGCCCGGCGAAAGCCGGATTAATACCGCATACGATCTATGGATGAAAGCGGGGGATCGCAAGACCTCGCGCTATTGGGGTGGCCGATGGCGGATTAGCTAGTTGGTGGGGTAAAGGCCTACCAAGGCGACGATCCGTAGCTGGTCTGAGAGGACGACCAGCCACACTGGGACTGAGACACGGCCCAG	0	0	0	0	0	0	0	0	12	0	0	1018	0	273	0	0	0	0	0	30	0	0	0	0	0	11	0	0	0	0	0	0	0	0	0	0	0	7	0	0	0	0	0	0	0	0	211	0
80	ATTGAACGCTGGCGGCAGGCCTAACACATGCAAGTCGAACGGTAACAGGAAGCAGCTTGCTGCTTTGCTGACGAGTGGCGGACGGGTGAGTAATGTCTGGGAAACTGCCTGATGGAGGGGGATAACTACTGGAAACGGTAGCTAATACCGCATAACGTCGCAAGACCAAAGAGGGGGACCTTCGGGCCTCTTGCCATCGGATGTGCCCAGATGGGATTAGCTAGTAGGTGGGGTAACGGCTCACCTAGGCGACGATCCCTAGCTGGTCTGAGAGGATGACCAGCCACACTGGAACTGAGACACGGTCCAG	0	0	0	0	0	0	0	0	0	0	0	0	0	0	0	0	0	0	0	0	0	0	16	0	0	0	0	0	0	0	0	0	0	0	0	0	0	0	0	0	0	0	0	0	0	0	0	0
81	GACGAACGCTGGCGGCGTGCCTAATACATGCAAGTCGAGCGAGCTTGCCTAGATGAATTTGGTGCTTGCACCAGATGAAACTAGATACAAGCGAGCGGCGGACGGGTGAGTAACACGTGGGTAACCTGCCCAAGAGACTGGGATAACACCTGGAAACAGATGCTAATACCGGATAACAACACTAGACGCATGTCTAGAGTTTAAAAGATGGTTCTGCTATCACTCTTGGATGGACCTGCGGTGCATTAGCTAGTTGGTAAGGTAACGGCTTACCAAGGCAATGATGCATAGCCGAGTTGAGAGACTGATCGGCCACATTGGGACTGAGACACGGCCCAA	0	0	0	0	0	0	0	0	0	0	0	0	0	0	0	0	0	0	0	445	0	0	0	0	0	54	0	0	0	0	0	0	0	0	0	0	0	0	0	0	0	0	0	0	0	0	0	124
82	GATGAACGCTGGCGGCGTGCTTAACACATGCAAGTCGAACGGGATCCGACCAGCTTGCTGGTTGGTGAGAGTGGCGAACGGGTGAGTAATGCGTGACCAACCTGCCCCATGCTCCAGAATAGCTCTTGGAAACGGGTGGTAATGCTGGATGCTCCAACTTGACGCATGTCTTGTTGGGAAAGTGTTTAGTGGCATGGGATGGGGTCGCGTCCTATCAGCTTGTAGGCGGGGTAATGGCCCACCTAGGCTTCGACGGGTAGCCGGCCTGAGAGGGCGGACGGCCACATTGGGACTGAGATACGGCCCAG	0	0	0	0	231	0	0	0	0	0	0	0	0	0	0	527	0	0	0	0	0	0	0	0	0	0	0	0	0	0	0	0	0	0	0	0	0	0	0	0	0	0	0	0	0	0	0	0
83	GATGAACGCTGGCGGCGTGCTTAACACATGCAAGTCGAACGGAAAGGCCCTTGCTTGCAAGGGTGCTCGAGTGGCGAACGGGTGAGTAACACGTAGGTGATCTGCCTTTCACTTCGGGATAAGCTTGGGAAACTGGGTCTAATACCGGATATTCACGGCACCGTGGTTGGTGTGGTGGAAAGCTTTTGCGGTGGGAGATGAGCTTGCGGCCTATCAGCTTGTTGGTGGGGTAATGGCCTACCAAGGCGGCGACGGGTAGCCGGCCTGAGAGGGTGTGCGGCCACATTGGGACTGAGATACGGCCCAG	0	0	0	0	19	0	12	0	0	0	0	0	0	0	0	0	0	0	13	0	0	0	0	0	4	0	0	0	0	0	0	0	0	0	0	0	12	5	0	0	0	0	0	0	0	0	0	0
84	ATTGAACGCTGGCGGCAGGCCTAACACATGCAAGTCGAACGGTAACAGAAAGCAGCTTGCTGCTTTGCTGACGAGTGGCGGACGGGTGAGTAATGTCTGGGAAACTGCCTGATGGAGGGGGATAACTACTGGAAACGGTAGCTAATACCGCATAACGTCGCAAGACCAAAGAGGGGGACCTTCGGGCCTCTTGCCATCGGATGTGCCCAGATGGGATTAGCTAGTAGGTGGGGTAACGGCTCACCTAGGCGACGATCCCTAGCTGGTCTGAGAGGATGACCAGCCACACTGGAACTGAGACACGGTCCAG	0	0	0	0	12	0	0	0	0	0	0	0	0	0	0	0	0	0	0	27	0	0	0	0	0	0	0	0	0	0	0	0	0	0	0	0	0	0	0	0	0	0	0	0	0	0	0	0
85	GACGAACGCTGGCGGCGTGCTTAACACATGCAAGTCGAACGGGATTTAGTAAACAGAAGCCTCGGTGGAAGATTACTAATGAGAGTGGCGAACGGGTGAGTAACGCGTGAGCAACCTGCCTATGACAGTGGGATAGCCTCGGGAAACCGGGATTAATACCGCATAAAATCGTAGAAACACATGTTTCAACGGTCAAAGATTTATCGGTCATAGATGGGCTCGCGTCTGATTAGCTAGTTGGTGAGATAACAGCCCACCAAGGCGACGATCAGTAGCCGGTCTGAGAGGATGAACGGCCACATTGGAACTGAGACACGGTCCAA	0	0	0	140	0	0	131	0	0	0	0	0	0	0	0	0	0	0	2138	0	14	232	260	11	130	0	205	0	0	0	0	0	0	0	0	0	188	221	0	0	0	0	154	0	0	0	156	0
86	GATGAACGCTAGCTACAGGCTTAACACATGCAAGTCGCAGGGTAACATGAGGAAAGCTTGCTTTCCTTGATGACGACTGGCGCACGGGTGAGTAACGCGTATCCAACCTTCCCATAACTACGGGATAACCCGTTGAAAGACGGCCTAATACCGTATGATATCGTTTGCTGACATCAAATAACGATTAAAGGTTTAGCGGTTATGGATGGGGATGCGTCTGATTAGCTTGTTGGCGGGGTAACGGCCCACCAAGGCTACGATCAGTAGGGGTTCTGAGAGGAAGGTCCCCCACATTGGAACTGAGACACGGTCCAA	0	0	0	0	12	0	0	0	0	0	0	0	0	0	0	0	0	0	406	0	0	0	0	0	0	0	0	0	0	0	0	0	0	0	0	0	0	0	0	0	0	0	109	0	0	0	0	0
87	GACGAACGCTGGCGGCGTGCCTAATACATGCAAGTCGAGCGAGCGGAACTAACAGATTTACTTCGGTAATGACGTTAGGAAAGCGAGCGGCGGATGGGTGAGTAACACGTGGGGAACCTGCCCCATAGTCTGGGATACCACTTGGAAACAGGTGCTAATACCGGATAAGAAAGCAGATCGCATGATCAGCTTTTAAAAGGCGGCGTAAGCTGTCGCTATGGGATAGCCCCGCGGTGCATTAGCTAGTTGGTAAGGTAAAGGCTTACCAAGGCGATGATGCATAGCCGAGTTGAGAGACTGATCGGCCACATTGGGACTGAGACACGGCCCAA	0	0	0	0	0	0	0	0	0	0	0	0	0	0	0	0	0	0	0	0	0	0	0	0	0	0	0	0	0	0	0	0	0	0	0	0	0	0	0	0	0	0	0	0	0	0	0	0
88	GACGAACGCTGGCGGCGTGCCTAATACATGCAAGTCGAGCGAGCGGAACTAACAGATTTACTTCGGTAATGACGTTAGGAAAGCGAGCGGCGGATGGGTGAGTAACACGTGGGGAACCTGCCCCATAGTCTGGGATACCACTTGGAAACAGGTGCTAATACCGGATAAGAAAGCAGATCGCATGATCAGCTTTTAAAAGGCGGCGTAAGCTGTCGCTATGGGATGGCCCCGCGGTGCATTAGCTAGTTGGCAAGGTAAAGGCTTACCAAGGCGATGATGCATAGCCGAGTTGAGAGACTGATCGGCCACATTGGGACTGAGACACGGCCCAA	0	0	0	0	0	0	0	0	0	0	0	0	0	0	0	0	0	0	0	0	0	0	0	0	0	0	0	0	0	0	0	0	0	0	0	0	0	0	0	0	0	0	0	0	0	0	0	0
89	GATGAACGCTGGCGGCGTGCTTAACACATGCAAGTCGAACGGGATCCATCGGGCTTTGCTTGGTGGTGAGAGTGGCGAACGGGTGAGTAATGCGTGACCGACCTGCCCCATGCACCGGAATAGCTCCTGGAAACGGGTGGTAATGCCGGATGCTCCATCACACCGCATGGTGTGTTGGGAAAGCCTTTGCGGCATGGGATGGGGTCGCGTCCTATCAGCTTGATGGCGGGGTAACGGCCCACCATGGCTTCGACGGGTAGCCGGCCTGAGAGGGCGACCGGCCACATTGGGACTGAGATACGGCCCAG	0	0	0	0	0	0	0	0	0	0	0	0	0	0	0	0	0	0	0	0	0	0	0	0	0	0	0	0	0	0	0	0	0	0	0	0	0	0	0	0	0	0	0	0	0	0	0	0
90	GACGAACGCTGGCGGCGTGCCTAATACATGCAAGTCGAGCGAGCTTGCCTATTGAAATTCTTCGGAATGGACATAGATACAAGCTAGCGGCGGATGGGTGAGTAACGCGTGGGTAACCTGCCCTTAAGTCTGGGATACCATTTGGAAACAGATGCTAATACCGGATAAAAGCTACTTTCGCATGAAAGAAGTTTAAAAGGCGGCGTAAGCTGTCGCTAAAGGATGGACCTGCGATGCATTAGCTAGTTGGTAAGGTAACGGCTTACCAAGGCGATGATGCATAGCCGAGTTGAGAGACTGATCGGCCACATTGGGACTGAGACACGGCCCAA	0	0	0	0	0	0	0	0	0	0	0	0	0	0	0	0	0	0	0	0	0	0	0	4	0	0	0	0	0	0	0	0	765	0	0	0	0	0	0	0	0	0	0	0	0	0	0	0
91	GATGAACGCTGGCGGCGTGCCTAATACATGCAAGTCGAGCGAACAGACGAGGAGCTTGCTCCTCTGACGTTAGCGGCGGACGGGTGAGTAACACGTGGATAACCTACCTATAAGACTGGGATAACTTCGGGAAACCGGAGCTAATACCGGATAATATATTGAACCGCATGGTTCAATAGTGAAAGACGGTTTTGCTGTCACTTATAGATGGATCCGCGCCGCATTAGCTAGTTGGTAAGGTAACGGCTTACCAAGGCGACGATGCGTAGCCGACCTGAGAGGGTGATCGGCCACACTGGAACTGAGACACGGTCCAG	0	0	0	0	97	0	0	0	117	0	0	0	0	0	0	0	358	0	0	0	0	24	0	0	0	0	0	0	1553	0	0	0	0	0	0	0	60	336	0	0	0	0	0	0	0	0	0	0
92	GATGAACGCTAGCTACAGGCTTAACACATGCAAGTCGAGGGGAAACGGCATTAAGTGCTTGCACTTTTTGGACGTCGACCGGCGCACGGGTGAGTAACGCGTATCCAACCTTCCCATGACTAAGGGATAACCTGCCGAAAGGCAGACTAATACCTTATGGTCTTCACTGACGGCATCAGATGTGAAGTAAAGATTTATCGGTTATGGATGGGGATGCGTCTGATTAGCTTGTTGGCGGGGTAACGGCCCACCAAGGCAACGATCAGTAGGGGTTCTGAGAGGAAGGTCCCCCACATTGGAACTGAGACACGGTCCAA	0	0	0	0	0	0	0	0	0	0	0	0	0	0	381	0	0	0	0	293	0	0	0	0	0	94	0	0	0	0	0	0	0	0	0	0	0	0	0	0	0	0	0	0	0	0	0	0
93	ATTGAACGCTGGCGGCAGGCCTAACACATGCAAGTCGAACGGTAGCACAGAGAGCTTGCTCTCGGGTGACGAGTGGCGGACGGGTGAGTAATGTCTGGGAAACTGCCTGATGGAGGGGGATAACTACTGGAAACGGTAGCTAATACCGCATAACGTCGCAAGACCAAAGAGGGGGACCTTCGGGCCTCTTGCCATCAGATGTGCCCAGATGGGATTAGCTAGTAGGTGGGGTAACGGCTCACCTAGGCGACGATCCCTAGCTGGTCTGAGAGGATGACCAGCCACACTGGAACTGAGACACGGTCCAG	0	0	0	0	0	0	0	0	0	0	0	0	0	0	0	0	0	27	0	0	0	0	0	0	0	0	0	155	0	0	0	0	0	0	0	6	0	0	0	0	28	0	0	0	0	0	0	0
94	ATTGAACGCTGGCGGCAGGCCTAACACATGCAAGTCGAACGGTAACAGGGATCAGCTTGCTGATTCGCTGACGAGTGGCGGACGGGTGAGTAATGTCTGGGAAACTGCCTGATGGAGGGGGATAACTACTGGAAACGGTAGCTAATACCGCATAACGTCGCAAGACCAAAGAGGGGGACCTTCGGGCCTCTTGCCATCGGATGTGCCCAGATGGGATTAGCTAGTAGGTGGGGTAACGGCTCACCTAGGCGACGATCCCTAGCTGGTCTGAGAGGATGACCAGCCACACTGGAACTGAGACACGGTCCAG	0	1153	2894	849	0	0	1565	0	0	0	0	0	0	0	0	0	0	0	0	0	6	0	15	0	0	0	0	0	0	0	0	0	0	0	0	0	0	0	0	0	0	0	0	0	0	0	0	0
95	ATTGAACGCTGGCGGCAGGCCTAACACATGCAAGTCGAACGGTAACAGGAAGCAGCTTGCTGCTTTGCTGACGAGTGGCGGACGGGTGAGTAATGTCTGGGAAACTGCCCGATGGAGGGGGATAACTACTGGAAACGGTAGCTAATATCGCATAACGTCGCAAGACCAAAGAGGGGGACCTTCGGGCCTCTTGCCATCGGATGTGCCCAGATGGGATTAGCTAGTAGGTGGGGTAACGGCTCACCTAGGCGACGATCCCTAGCTGGTCTGAGAGGATGACCAGCCACACTGGAACTGAGACACGGTCCAG	0	0	0	0	0	0	0	0	0	0	0	0	0	0	0	0	0	0	0	0	0	0	0	0	0	0	0	0	0	0	0	0	0	0	0	0	0	0	0	0	0	0	0	0	0	0	0	0
96	GACGAACGCTGGCGGCGTGCCTAATACATGCAAGTCGAGCGAGCGGAACTAACAGATTTACCTCGGTAATGACGTTAGGAAAGCGAGCGGCGGATGGGTGAGTAACACGTGGGGAACCCGCCCCATAGTCTGGGATACCACTTGGAAACAGGTGCTAATACCGGATAAGAAAGCAGATCGCATGATCAGCTTTTAAAAGGCGGCGTAAGCTGTCGCTATGGGATGGCCCCGCGGTGCATTAGCTAGTTGGTAAGGTAAAGGCTTACCAAGGCGATGATGCATAGCCGAGTTGAGAGACTGATCGGCCACATTGGGACTGAGACACGGCCCAA	0	0	0	0	0	0	0	0	0	0	0	0	0	0	0	0	0	0	0	0	0	0	0	0	0	0	0	0	0	0	0	0	0	0	0	0	0	0	0	0	0	0	0	0	0	0	0	0
97	GACGAACGCTGGCGGCGTGCTTAACACATGCAAGTCGAACGGTGATCCACCTTCGGGTGGTGATCAGTGGCGAACGGGTGAGTAACACGTGGGCAACCTGCCCCTGACACTGGGATAACCCCTCGAAAGAGGGGCTAATACCGGATATGAGCGGGTCGGACATCCGACCCGTTGGAAAGGATTCTGGTCAGGGATGGGCCCGCGGCCTATCAGCTTGTTGGTGGGGTAATGGCCCACCAAGGCGACGACGGGTAGCCGGCCTGAGAGGGCGACCGGCCACACTGGGACTGAGACACGGCCCAG	0	0	0	0	0	0	0	0	0	0	0	0	0	0	0	0	0	0	0	0	0	0	0	0	0	0	0	0	0	0	0	0	0	0	0	0	0	0	0	0	0	0	0	0	0	0	0	0
98	ATTGAACGCTGGCGGCATGCCTTACACATGCAAGTCGAACGGTAACAGGTCTTCGGATGCTGACGAGTGGCGAACGGGTGAGTAATACATCGGAACGTGCCCGATCGTGGGGGATAACGAGGCGAAAGCTTTGCTAATACCGCATACGATCTACGGATGAAAGCGGGGGATCTTCGGACCTCGCGCGGACGGAGCGGCCGATGGCAGATTAGGTAGTTGGTGGGATAAAAGCTTACCAAGCCGACGATCTGTAGCTGGTCTGAGAGGATGATCAGCCACACTGGGACTGAGACACGGCCCAG	0	0	0	0	0	0	0	0	0	0	0	0	0	0	0	358	0	0	0	0	2	18	0	0	0	12	1639	4698	6	0	975	0	0	0	0	0	0	0	0	554	0	0	3	0	0	0	0	0
99	GATGAACGCTAGCTATAGGCTTAACACATGCAAGTCGAGGGGCAGCATATAGATTGCTTGCAATTTATGATGGCGACCGGCGCACGGGTGAGTAACGCGTATCCAACCTACCCATTACTAGGGAATAACCCAGCGAAAGTTGGCCTAATGCCCTATGTAGTCGTTTGATCGCCTGAGATTTCGACGAAAGATTTATCGGTATTGGATGGGGATGCGTCTGATTAGCTTGTTGGCGGGGTAAAGGCCCACCAAGGCAACGATCAGTAGGGGTTCTGAGAGGAAGGTCCCCCACATTGGAACTGAGACACGGTCCAA	0	0	0	0	38	0	0	0	0	0	0	0	0	0	0	0	0	0	0	0	0	0	0	0	0	0	0	0	0	0	0	0	0	0	0	0	0	0	0	0	0	0	0	0	0	0	0	0
100	ATTGAACGCTGGCGGCAGGCCTAACACATGCAAGTCGAACGGTAACAGGAAGCAGCTTGCTGCTTTGCTGACGAGTGGCGGACGGGTGAGTAATGTCTGGGAAACTGCCCGATGGAGGGGGATAACTACTGGAAACGGTAGCTAATACCGCATAACGTCGCAAGACCAAAGAGGGGGACCTTCGGGCCTCTTGCCATCGGATGTGCCCAGATGGGATTAGCTAGTAGGTGGGGTAAAGGCTCACCTAGGCGACGATCCCTAGCTGGTCTGAGAGGATGACCAGCCACACTGGAACTGAGACACGGTCCAG	0	0	0	0	0	0	0	0	0	0	0	0	0	0	0	0	0	17	0	0	0	0	0	0	0	0	0	0	0	0	0	0	0	0	0	0	0	0	0	0	0	0	0	0	0	0	0	0
101	GATTAACGCTGGCGGCATGCCTAATACATGCAAATCGAACGAAGCCTTTTAGGCTTAGTGGTGAACGGGTGAGTAACACGTATCCAATCTACCCTTAAGTTGGGGATAACTAGTCGAAAGATTAGCTAATACCGAATAATAACATCAATATCGCATGAGAAGATGTAGAAAGTCGCTCTTTGTGGCGACGCTTTTGGATGAGGGTGCGACGTATCAGATAGTTGGTGAGGTAATGGCTCACCAAGTCAATGACGCGTAGCTGTACTGAGAGGTAGAACAGCCACAATGGGACTGAGACACGGCCCAG	0	0	0	0	0	0	0	0	0	0	0	0	0	0	0	0	0	0	0	0	0	0	0	0	0	0	0	0	0	0	0	0	0	0	0	0	0	0	0	664	710	1832	0	1104	2067	0	0	0
102	GACGAACGCTGGCGGCGTGCCTAATACATGCAAGTCGAGCGAGCTTGCCTAGATGAATTTGGTGCTTGCACCAAATGAAACTAGATACAAGCGAGCGGCGGACGGGTGAGTAACACGTGGGTAACCTGCCCAAGAGACTGGGATAACACCTGGAAACAGATGCTAATACCGGATAACAACACTAGACGCATGTCTAGAGTTTAAAAGATGGTTCTGCTATCACTCTTGGATGGACCTGCGGTGCATTAGCTAGTTGGTAAGGCAACGGCTTACCAAGGCAATGATGCATAGCCGAGTTGAGAGACTGATCGGCCACATTGGGACTGAGACACGGCCCAA	0	0	0	0	0	0	0	0	0	0	0	0	0	0	0	0	0	0	1524	0	0	0	0	0	0	0	0	0	0	0	0	0	0	0	0	0	0	0	0	0	0	0	0	0	0	0	0	7823
103	GATGAACGCTGGCGGCGTGCTTAACACATGCAAGTCGAACGGGATCCATCGGGCTTTGCCTGGTGGTGAGAGTGGCGAACGGGTGAGTAATGCGTGACCGACCTGCCCCATGCACCGGAATAGCTCCTGGAAACGGGTGGTAATGCCGGATGCTCCATCGCACCGCATGGTGTGTTGGGAAAGCCTTTGCGGCATGGGATGGGGTCGCGTCCTATCAGCTTGATGGCGGGGTAACGGCCCACCATGGCTTCGACGGGTAGCCGGCCTGAGAGGGCGACCGGCCACATTGGGACTGAGATACGGCCCAG	0	0	0	0	0	0	0	0	0	0	0	0	0	0	0	0	0	0	0	0	0	0	0	0	0	0	0	0	0	0	0	0	0	0	0	0	0	0	0	0	0	0	0	0	0	0	0	0
104	GACGAACGCTGGCGGCGTGCCTAATACATGCAAGTCGTGCGAGTCTGCCTTGAAGATCGGAGTGCTTGCACTCTGTGAAACAAGATACAGGCTAGCGGCGGACGGGTGAGTAACACGTGGGTAACCTGCCCAAGAGATCGGGATAACACCTGGAAACAGATGCTAATACCGGATAACAACAGATGATGCCTATCAACTGTTTAAAAGATGGTTCTGCTATCACTCTTGGATGGACCTGCGGTGCATTAGCTAGTTGGTAGGGTAACGGCCTACCAAGGCGATGATGCATAGCCGAGTTGAGAGACTGATCGGCCACATTGGGACTGAGACACGGCCCAA	0	0	0	0	0	0	0	0	0	0	0	0	0	0	0	0	0	0	0	0	0	0	0	0	0	0	0	0	0	0	0	0	0	0	0	0	0	0	0	0	0	0	0	0	0	0	0	0
105	ATTGAACGCTGGCGGCAGGCCTAACACATGCAAGTCGAACGGTAACAGGAAGCAGCTTGCTGCTTTGCTGACGAGTGGCGGACGGGTGAGTAATGTCTGGGAAACTGCCCGATGGAGGGGGATAACTACTGGAAACGGTAGCTAATACCGCATAACGTCGCAAGACCAAAGAGGGGGACCTTAGGGCCTCTTGCCATCGGATGTGCCCAGATGGGATTAGCTAGTAGGTGGGGTAACGGCTCACCTAGGCGACGATCCCTAGCTGGTCTGAGAGGATGACCAGCCACACTGGAACTGAGACACGGTCCAG	0	0	0	0	0	0	0	0	0	0	0	0	0	0	0	0	0	0	0	0	0	0	0	0	0	0	0	0	0	0	0	0	0	0	0	0	0	0	0	0	0	0	0	0	0	0	0	0
106	GATGAACGCTAGCTACAGGCTTAACACATGCAAGTCGCAGGGTAACATGAGGAAAGCTTGCTTTTCTTGATGACGACTGGCGCACGGGTGAGTAACGCGTATCCAACCTTCCCATAACTACGGGATAACCCGTTGAAAGACGGCCTAATACCGTATGACATCGTTTGCTGACATCAAATAACGATTAAAGGTTTAGCGGTTATGGATGGGGATGCGTCTGATTAGCTTGTTGGCGGGGTAACGGCCCACCAAGGCGACGATCAGTAGGGGTTCTGAGAGGAAGGTCCCCCACATTGGAACTGAGACACGGTCCAA	0	0	0	0	0	0	0	0	0	0	0	0	0	0	0	0	0	0	0	0	0	0	0	0	0	0	0	0	0	0	0	0	0	0	0	0	0	0	0	0	0	0	0	0	0	0	0	0
107	GATAAACGCTGACAGAATGCTTAACACATGCAAGTCGATGATGGGAGCTAGCTTGCTAGAAGAAGTCATGGCGGACGGGTGAGTAACGTGTAAAGAACTTACCATATAGACTGGGATAACAGAGGGAAACTTCTGATAATACTGGATAAGTTAGAAGTAGCATTACTAAGTAATGAAAGGTAGCAATACGCTATATGAGAGCTTTGCATCCTATTAGCTAGTTGGTGGGGTAAAAGCCTACCAAGGCGATGATAGGTAGCCGGCCTGAGAGGGTGGACGGCCACAAGGGGACTGAGATACGGCCCTT	0	0	0	0	119	0	0	0	0	0	0	0	0	0	0	0	0	0	0	0	0	0	0	0	0	0	0	0	0	0	0	0	0	0	0	0	0	0	0	0	0	0	0	0	0	0	0	0
108	GATGAACGCTGGCGGCGTGCCTAATACATGCAAGTCGAGCGAACAGACGAGGAGCTTGCTCCTCTAACGTTAGCGGCGGACGGGTGAGTAACACGTGGATAACCTACCTATAAGACTGGGATAACTTCGGGAAACCGGAGCTAATACCGGATAATATATTGAACCGCATGGTTCAATAGTGAAAGACGGTTTTGCTGTCACTTATAGATGGATCCGCGCCGCATTAGCTAGTTGGTAAGGTAACAGCTTACCAAGGCAACGATGCGTAGCCGACCTGAGAGGGTGATCGGCCACACTGGAACTGAGACACGGTCCAG	0	0	0	0	0	0	0	0	0	0	0	0	0	0	0	0	0	0	0	0	0	0	0	0	0	0	0	0	0	0	0	0	0	0	0	0	0	64	0	0	0	0	0	0	0	0	0	0
109	ATTGAACGCTGGCGGCATGCCTTACACATGCAAGTCGAACGGCAGCGCGGGGGCAACCCTGGCGGCGAGTGGCGAACGGGTGAGTAATATATCGGAACGTGCCCTGGAGTGGGGGATAACGTAGCGAAAGTTACGCTAATACCGCATACGATCTACGGATGAAAGTGGGGGATCGCAAGACCTCATGCTCCTGGAGCGGCCGATATCTGATTAGCTAGTTGGGGGGGTAAAGGCCCACCAAGGCGACGATCAGTAGCTGGTCTGAGAGGACGACCAGCCACACTGGGACTGAGACACGGCCCAG	0	0	0	0	0	0	0	0	0	0	0	0	0	0	0	0	0	0	0	0	0	0	0	0	0	0	0	0	0	0	0	0	0	0	0	0	0	0	0	0	0	0	0	0	0	0	0	0
110	ATTGAACGCTGGCGGCAGGCTTAACACATGCAAGTCGAACGGTAGCAGGAGAAAGCTTGCTTTCTTGCTGACGAGTGGCGGACGGGTGAGTAATGCTTGGGAATCTGGCTTATGGAGGGGGATAACTACGGGAAACTGTAGCTAATACCGCGTAGTATCGAGAGATGAAAGTGCGGGACCGTAAGGCCGCATGCCATGAGATGAGCCCAAGTGGGATTAGGTAGTTGGTGGGGTAAAGGCCTACCAAGCCTGCGATCTCTAGCTGGTCTGAGAGGATGGCCAGCCACACTGGAACTGAGACACGGTCCAG	0	0	0	0	0	0	0	0	0	0	0	0	0	0	0	0	0	0	0	0	0	0	0	0	0	0	0	0	0	0	0	0	0	0	0	0	0	0	0	0	0	0	0	0	0	0	0	0
111	GACGAACGCTGGCGGCGTGCCTAATACATGCAAGTCGAGCGAGCGAAACTAACAGATTTACTTCGGTAATGACGTTAGGAAAGCGAGCGGCGGATGGGTGAGTAACACGTGGGGAACCTGCCCCATAGTCTGGGATACCACTTGGAAACAGGTGCTAATACCGGATAAGAAAGCAGATCGCATGATCAGCTTTTAAAAGGCGGCGTAAGCTGTCGCTATGGGATGGCCCCGCGGTGCATTAGCTAGTTGGTAAGGTAAAGGCTTACCAAGGCGATGATGCATAGCCGAGTTGAGAGACTGATCGGCCACATTGGGACTGAGACACGGCCCCA	0	0	0	0	0	0	0	0	0	0	0	0	0	0	0	0	0	0	0	0	0	0	0	0	0	0	0	0	0	0	0	0	0	0	0	0	0	0	0	0	0	0	0	0	0	0	0	0
112	GATGAACGCTAGCTATAGGCTTAACACATGCAAGTCGAGGGGCAGCGAATAGATAGCTTGCTATTTATGTCGGCGACCGGCGCACGGGTGAGTAACGCGTATCCAACCTACCCATAACTAAGGGATAACCCAGCGAAAGTTGGACTAATACCTTATGTGTTCGTTTGATCTCATGAGATTACGAATAAAGATTTATCGGTTATGGATGGGGATGCGTCTGATTAGCTTGTTGGCGGGGTAACGGCCCACCAAGGCAACGATCAGTAGGGGTTCTGAGAGGAAGGTCCCCCACATTGGAACTGAGACACGGTCCAA	0	0	0	0	0	0	0	0	0	0	0	0	0	0	0	0	0	0	0	0	0	0	0	0	0	0	0	0	0	0	0	0	0	0	0	0	0	0	0	0	0	0	0	0	0	0	0	0
113	GATGAACGCTAGCTATAGGCTTAACACATGCAAGTCGAGGGGAAACGGCAAAGAGTGCTTGCACCCTTTGGACGTCGACCGGCGCACGGGTGAGTAACGCGTATCCAACCTGCCCTTTACTTGGGGATAACCCGTTGAAAGACGGACTAATACCCAATGATATTCATTGATGACATCTGATTTGAATTAAAGATTTATCGGTATAGGATGGGGATGCGTCTGATTAGCTTGTTGGTGAGGTAACGGCTCACCAAGGCCACGATCAGTAGGGGTTCTGAGAGGAAGGTCCCCCACATTGGAACTGAGACACGGTCCAA	0	0	0	0	0	0	0	0	0	0	0	0	0	0	0	0	0	0	0	0	0	0	0	0	0	0	0	0	0	0	0	0	0	0	0	0	0	0	0	0	0	0	0	0	0	0	0	0
114	GACGAACGCTGGCGGCGTGCCTAATACATGCAAGTAGAACGCTGAAGGGAGAGCTTGCTCTTCTGGACGAGTTGCGAACGGGTGAGTAACGCGTAGGTAACCTGCCTGGTAGCGGGGGATAACTATTGGAAACGATAGCTAATACCGCATAACAGTAAATGTTGCATGACATTTGCTTAAAAGGTGCAATTGCATCACTACCAGATGGACCTGCGTTGTATTAGCTAGTTGGTGGGGTAACGGCTCACCAAGGCGACGATACATAGCCGACCTGAGAGGGTGATCGGCCACACTGGGACTGAGACACGGCCCAG	0	0	0	0	0	0	0	0	0	0	0	0	0	0	0	0	0	0	0	0	0	0	0	0	0	0	0	0	0	0	0	0	0	0	0	0	0	0	0	0	0	0	0	0	0	0	0	0
115	AACGAACGCTGGCGGCGGGCCTCATACATGCAAGTCGAGCGCGAAAGTCCGCAAGGATGAGTAAAGCGGCGCACGGGTGAGTAACACGTGGATAATCTACCCTTTGGATTGGAATAACCTGTCGAAAGACGGGCTAATGCCGAGTACGCACTCGAGGGCGTGAAGCTCTTGAGTGGAAAGATGGCGCAAGCTATCGCCGATGGATGAGTCTGCGTCCCATTAGTTAGTTGGTGAGGTAACGGCTTACCAAGACAATGATGGGTACCTGGTCTGAGAGGATGATCAGGCACACTGGAACTGAAACACGGTCCAG	0	0	4	83	0	0	0	0	3	1285	0	7	0	573	0	949	0	0	0	39	26	53	0	0	0	94	0	1041	6	0	774	0	0	303	0	9	3	0	0	32	0	0	0	0	0	0	68	0
116	GATGAACGCTAGCGGCAGGCTTAATACATGCAAGTCGAGGGGCAGCACGGGTAGCAATACTGGGTGGCGACCGGCGCACGGGTGCGTAACACGTATGTAATCTGCCCTTAACAGGGGGATAGCCCGGAGAAATCCGGATTAATACCCCATAGTAATATGGATCGGCATCGATTTATATTTAAAGCTCCGGCGGTTAAGGATGAACATGCGACTGATTAGCTAGTTGGTGAGGTAATGGCTCACCAAGGCGACGATCAGTAGGGGTACTGAGAGGTTAAACCCCCACACTGGTACTGAGACACGGACCAG	0	0	0	65	0	0	0	1244	227	1118	0	11	0	0	3	0	0	5	0	0	0	35	116	0	0	0	350	511	929	101	573	0	0	0	621	4	0	0	0	0	0	0	0	0	0	0	0	0
117	GACGAACGCTGGCGGCGTGCTTAACACATGCAAGTCGAACGGGATTTAGTAGACGGAAGCCTCGGTGGAAGATTACTAATGAGAGTGGCGAACGGGTGAGTAACGCGTGAGCAACCTGCCTATGACAGTGGGATAGCCTCGGGAAACCGGGATTAATACCGCATAAAATCGTAGAAACACATGTTTCAACGGTCAAAGATTTATCGGTCATAGATGGGCTCGCGTCTGATTAGCTAGTTGGTGAGATAACAGCCCACCAAGGCGACGATCAGTAGCCGGTCTGAGAGGATGAACGGCCACATTGGAACTGAGACACGGTCCAA	0	532	13	0	0	0	133	0	0	0	0	0	0	0	0	0	0	0	0	0	0	0	0	0	0	0	0	0	0	0	0	0	0	0	0	0	0	0	0	0	0	0	0	0	0	0	0	0
118	GATGAACGCTGACAGAATGCTTAACACATGCAAGTCAACTTGAATTTGGGTTTTTAACTTAGATTTGGGTGGCGGACGGGTGAGTAACGCGTAAAGAACTTGCCTCACAGATAGGGACAACATTTAGAAATGAATGCTAATACCTGATATTATGATTTTAAGGCATCTTAGAATTATGAAAGCTATATGCGCTGTGAGAGAGCTTTGCGTCCCATTAGCTAGTTGGAGAGGTAACAGCTCACCAAGGCGATGATGGGTAGCCGGCCTGAGAGGGTGAACGGCCACAAGGGGACTGAGACACGGCCCTT	0	0	0	0	0	0	0	0	0	0	0	0	0	0	0	0	0	0	0	0	0	0	0	0	0	0	0	0	0	0	0	0	0	0	0	0	0	0	0	0	0	0	0	0	0	0	0	0
119	GATGAACGCTGGCGGCGTGCCTAATACATGCAAGTCGAGCGAACAGACGAGGAGCTTGCTCCTTTGACGTTAGCGGCGGACGGGTGAGTAACACGTGGGTAACCTACCTATAAGACTGGGATAACTTCGGGAAACCGGAGCTAATACCGGATAATATTTCGAACCGCATGGTTCGATAGTGAAAGATGGCTCTGCTATCACTTATAGATGGACCTGCGCCGTATTAGCTAGTTGGTAAGGTAACGGCTTACCAAGGCAACGATACGTAGCCGACCTGAGAGGGTGATCGGCCACACTGGAACTGAGACACGGTCCAG	0	299	0	0	0	0	0	0	0	0	0	0	0	0	0	1109	4270	0	0	105	0	0	0	0	0	0	0	0	0	0	0	0	0	0	0	0	0	0	0	0	0	0	0	0	19	0	0	0
120	AACGAACGCTGGCGGCAGGCTTAACACATGCAAGTCGAGCGCCCCGCAAGGGGAGCGGCAGACGGGTGAGTAACGCGTGGGAATCTACCCATCTCTACGGAACAACTCCGGGAAACTGGAGCTAATACCGTATACGTCCTTATGGAGAAAGATTTATCGGAGATGGATGAGCCCGCGTTGGATTAGCTAGTTGGTGGGGTAATGGCCTACCAAGGCGACGATCCATAGCTGGTCTGAGAGGATGATCAGCCACACTGGGACTGAGACACGGCCCAG	0	0	0	0	0	0	0	0	0	0	0	0	0	0	0	0	0	0	0	0	0	0	0	0	0	0	0	0	0	0	0	0	0	0	604	0	0	0	0	0	0	0	0	0	0	0	0	0
121	GATGAACGCTGGCGGCGTGCCTAATACATGCAAGTCGAGCGAACAGACGAGGAGCTTGCTCCTTCGACGTTAGCGGCGGACGGGTGAGTAACACGTAGGTAACCTACCTATAAGACTGGGATAACTTCGGGAAACCGGAGCTAATACCGGATAATATTTCGAACCGCATGGTTCGATAGTGAAAGATGGCTTTGCTATCACTTATAGATGGACCTGCGCCGTATTAGCTAGTTGGTAAGGTAACGGCTTACCAAGGCAACGATACGTAGCCGACCTGAGAGGGTGATCGGCCACACTGGAACTGAGACACGGTCCAG	0	0	0	0	0	0	0	0	0	0	0	0	0	0	0	0	0	0	0	0	0	332	506	0	39	0	0	0	0	0	0	0	0	0	0	0	53	285	0	0	55	0	0	156	0	0	236	0
122	AGTGAACGCTGGCGGCGTGCCTAATACATGCAAGTCGAACGATGAAGCTTCTAGCTTGCTAGAATGCTGATTAGTGGCGCACGGGTGAGTAACGCATAGGTCATGTGCCTCTTAGCTTGGGATAGCCATTGGAAACGATGATTAATACCAGATACTCCCTACGGGGGAAAGATTTATCGCTAAGAGATCAGCCTATGTCCTATCAGCTTGTTGGTAAGGTAATGGCTTACCAAGGCTATGACGGGTATCCGGCCTGAGAGGGTGAACGGACACACTGGAACTGAGACACGGTCCAG	0	0	0	0	0	0	0	0	0	0	0	0	0	0	0	0	0	0	0	3400	0	0	0	0	0	1497	0	0	0	0	0	0	0	0	0	0	0	0	0	0	0	0	0	0	0	0	0	0
123	GACGAACGCTGGCGGCGTGCTTAACACATGCAAGTCGAACGGAAAGGCCTCAGCTTGCTGGGGTACTCGAGTGGCGAACGGGTGAGTAACACGTGGGTGATCTGCCTTGCACTCTGGGATAAGCTTGGGAAACTGGGTCTAATACCGGATATGAACTGCCTTTAGTGTGGTGGTTGGAAAGTTTTTTCGGTGCAAGATGAGCTCGCGGCCTATCAGCTTGTTGGTGGGGTAATGGCCTACCAAGGCGTCGACGGGTAGCCGGCCTGAGAGGGTGTACGGCCACATTGGGACTGAGATACGGCCCAG	0	0	0	0	0	0	0	0	0	0	0	0	0	0	0	0	0	0	0	0	0	0	0	0	0	0	0	0	0	0	0	0	0	0	0	0	0	0	0	0	0	0	0	0	0	0	0	0
124	GATGAACGCTGACGGAATGCTTAACACATGCAAGTCAACTTGAATTTGGGTTTTTAACTTAGATTTGGGTGGCGGACGGGTGAGTAACGCGTAAAGAACTTGCCTCACAGCTAGGGACAACATTTAGAAATGAATGCTAATACCTGATATTATGATTTTAAGGCATCTTAGAATTATGAAAGCTATAAGCACTGTGAGAGAGCTTTGCGTCCCATTAGCTAGTTGGAGAGGTAACAGCTCACCAAGGCGATGATGGGTAGCCGGCCTGAGAGGGTGAACGGCCACAAGGGGACTGAGACACGGCCCTT	0	0	0	0	0	0	0	0	0	0	0	0	0	0	0	0	0	0	0	0	0	0	0	0	0	0	0	0	0	0	0	0	0	0	0	0	0	0	0	0	0	0	0	0	0	0	0	0
125	ATTGAACGCTGGCGGCAGGCCTAACACATGCAAGTCGAACGGTAACAGGAAACAGCTTGCTGTTTCGCTGACGAGTGGCGGACGGGTGAGTAATGTCTGGGAAACTGCCTGATGGAGGGGGATAACTACTGGAAACGGTAGCTAATACCGCATAACGTCGCAAGACCAAAGAGGGGGACCCTCGGGCCTCTTGCCATCGGATGTGCCCAGATGGGATTAGCTTGTTGGTGGGGTAACGGCTCACCAAGGCGACGATCCCTAGCTGGTCTGAGAGGATGACCAGCCACACTGGAACTGAGACACGGTCCAG	0	0	0	0	0	0	0	0	0	0	0	0	0	0	0	0	0	0	0	0	0	0	0	0	0	0	0	0	0	0	0	0	0	0	0	0	0	0	0	0	0	0	0	0	0	0	0	0
126	ATTGAACGCTGGCGGCAGGCTTAACACATGCAAGTCGAGCGGAGATGAGGTGCTTGCACCTTATCTTAGCGGCGGACGGGTGAGTAATGCTTAGGAATCTGCCTATTAGTGGGGGACAACATTCCGAAAGGAATGCTAATACCGCATACGTCCTACGGGAGAAAGCAGGGGATCTTCGGACCTTGCGCTAATAGATGAGCCTAAGTCGGATTAGCTAGTTGGTGGGGTAAAGGCCTACCAAGGCGACGATCTGTAGCGGGTCTGAGAGGATGATCCGCCACACTGGGACTGAGACACGGCCCAG	0	301	0	72	0	0	0	139	55	1208	405	329	0	4	0	271	75	0	0	10	0	0	6	0	0	0	63	211	7	0	886	0	0	64	193	0	0	0	0	225	0	11	0	2	0	0	0	0
127	ATTGAACGCTGGCGGCAGGCCTAACACATGCAAGTCGAACGGTAACAGAAAGCAGCTTGCTGCTTTGCTGACGAGTGGCGGACGGGTGAGTAATGTCTGGGAAACTGCCTGATGGAGGGGGATAACTACTGGAAACGGTAGCTAATACCGCATAACGTCGCAAGACCAAAGAGGGGGACCTTAGGGCCTCTTGCCATCGGATGTGCCCAGATGGGATTAGCTAGTAGGTGGGGTAACGGCTCACCTAGGCGACGATCCCTAGCTGGTCTGAGAGGATGACCAGCCACACTGGAACTGAGACACGGTCCAG	0	0	0	0	0	0	0	0	0	0	0	0	0	0	0	0	0	0	0	0	0	0	0	0	0	0	0	0	0	0	0	0	0	0	0	0	0	0	0	0	0	0	0	0	0	0	0	0
128	ATTGAACGCTGGCGGCAGGCCTAACACATGCAAGTCGAGCGGTAGCACAGAGAGCTTGCTCTCGGGTGACGAGCGGCGGACGGGTGAGTAATGTCTGGGAAACTGCCTGATGGAGGGGGATAACTACTGGAAACGGTAGCTAATACCGCATAACGTCGCAAGACCAAAGTGGGGGACCTTCGGGCCTCATGCCATCAGATGTGCCCAGATGGGATTAGCTAGTAGGTGGGGTAACGGCTCACCTAGGCGACGATCCCTAGCTGGTCTGAGAGGATGACCAGCCACACTGGAACTGAGACACGGTCCAG	0	0	0	0	0	0	0	0	24	0	0	0	0	0	0	0	0	0	0	39	0	0	0	0	0	0	0	0	0	0	0	0	0	0	0	0	0	0	0	0	0	0	0	0	0	0	0	0
129	GACGAACGCTGGCGGCGTGCCTAATACATGCAAGTCGAGCGAGCGGAACTAACAGATTTACTTCGGTAATGACGTTAGGAAAGCGAGCGGCGGATGGGTGAGTAACACGTGGGGAACCTGCCCCATAGTCTGGGATACCACTTGGAAACAGGTGCTAATACCGGATAAGAAAGCGGATCGCATGATCAGCTTTTAAAAGGCGGCGTAAGCTGTCGCTATGGGATGGCCCCGCGGTGCATTAGCTAGTTGGTAAGGTAAAGGCTTACCAAGGCGATGATGCATAGCCGAGTTGAGAGACTGATCGGCCACATTGGGACTGAGACACGGCCCAA	0	0	0	0	0	0	0	644	1159	0	1435	0	7057	0	0	0	0	0	0	0	0	0	0	0	0	0	0	0	0	0	0	0	0	0	0	0	0	0	0	0	0	0	0	0	0	0	0	0
130	GATGAACGCTGGCGGCGTGCTTAACACATGCAAGTCGAACGGGATCTGGTCAGCTTGCTGACTGGTGAGAGTGGCGAACGGGTGAGTAATGCGTGACCAACCTGCCCCATGCTCCAGAATAGCTCTTGGAAACGGGTGGTAATGCTGGATGCTCCAACTTGACGCATGTCTTGTTGGGAAAGTGTTTAGTGGCATGGGATGGGGTCGCGTCCTATCAGCTTGTAGGCGGGGTAATGGCCCACCTAGGCTTCGACGGGTAGCCGGCCTGAGAGGGCGGACGGCCACATTGGGACTGAGATACGGCCCAG	0	0	0	0	0	0	0	0	0	0	0	0	0	0	0	0	0	0	0	0	0	0	0	0	0	0	0	0	0	0	0	0	0	0	0	0	0	0	0	0	0	0	0	0	0	0	0	0
131	GATGAACGCTAGCTATAGGCTTAACACATGCAAGTCGAGGGGAAACGGCAGAGAGTGCTTGCACACTTTGGACGTCGACCGGCGCACGGGTGAGTAACGCGTATCCAACCTGCCCTTTACTTGGGGATAACCCGTTGAAAGACGGACTAATACCCAATGATATTCATTGATGACATCTGATTTGAATTAAAGATTTATCGGTATAGGATGGGGATGCGTCTGATTAGCTTGTTGGTGAGGTAACGGCTCACCAAGGCAACGATCAGTAGGGGTTCTGAGAGGAAGGTCCCCCACATTGGAACTGAGACACGGTCCAA	0	0	0	0	0	0	0	0	0	0	0	0	0	0	0	0	0	0	0	0	0	0	0	31	0	0	0	0	0	0	0	0	0	0	0	0	0	0	0	0	0	0	111	0	0	0	0	0
132	AGTGAACGCTGGCGGCGTGCCTAATACATGCAAGTCGAACGATGAAGCTTCTAGCTTGCTAGAATGCTGATTAGTGGCGCACGGGTGAGTAACGCATAGGTCATGTGCCTCTTAGTTTGGGATAGCCATTGGAAACGATGATTAATACCAGATACTCCCTACGGGGGAAAGATTTATCGCTAAGAGATCAGCCTATGTCCTATCAGCTTGTTGGTAAGGTAATGGCTTACCAAGGCTATGACGGGTATCCGGCCTGAGAGGGTGAACGGACACACTGGAACTGAGACACGGTCCAG	0	0	0	0	0	0	32	0	0	0	0	0	0	0	0	0	0	0	0	3057	0	0	0	0	0	1746	0	0	0	0	0	0	0	0	0	0	0	0	0	0	0	0	0	0	0	0	0	0
133	GATGAACGCTGGCGGCGTGCCTAATACATGCAAGTCGAGCGAACAGATGAGGAGCTTGCTCCTCTGACGTTAGCGGCGGACGGGTGAGTAACACGTGGATAACCTACCTATAAGACTGGGATAACTTCGGGAAACCGGAGCTAATACCGGATAATATATTGAACCGCATGGTTCAATAGTGAAAGACGGTTTTGCTGTCACTTATAGATGGATCCGCGCCGCATTAGCTAGTTGGTAAGGTAACGGCTTACCAAGGCAACGATGCGTAGCCGACCTGAGAGGGTGATCGGCCACACTGGAACTGAGACACGGTCCAG	0	0	0	0	93	0	0	0	0	0	0	0	0	0	0	0	0	0	0	0	0	0	58	0	0	0	176	0	0	0	0	0	0	0	0	0	0	0	0	0	0	0	0	0	0	0	0	0
134	GATGAACGCTAGCTACAGGCTTAACACATGCAAGTCGAGGGGAAACGGCATTAAGTGCTTGCACTTTTTGGACGTCGACCGGCGCACGGGTGAGTAACGCGTATCCAACCTGCCCCTTACCAGGGAATAACCCGTTGAAAGACGGACTAATGCCCTATGCAGTCCTTTGACGGCATCAGATTAGGACTAAAGATTCATCGGTATGGGATGGGGATGCGTCTGATTAGCTTGTTGGCGGGGTAACGGCCCACCAAGGCATCGATCAGTAGGGGTTCTGAGAGGAAGGTCCCCCACATAGGAACTGAGACACGGTCCTA	0	0	0	0	0	0	0	0	0	0	0	0	0	0	0	0	0	0	32	0	0	0	24	0	0	0	634	0	0	0	0	0	0	0	0	0	0	0	0	0	0	0	0	0	0	0	0	0
135	GACGAACGCTGGCGGCGTGCCTAATACATGCAAGTCGAACGCTTCTTTTTCCACCGGAGCTTGCTCCACCGGAAAAAGAAGAGTGGCGAACGGGTGAGTAACACGTGGGTAACCTGCCCATCAGAAGGGGATAACACTTGGAAACAGGTGCTAATACCGTATAACAATCAAAACCGCATGGTTTTGATTTGAAAGGCGCTTTCGGGTGTCGCTGATGGATGGACCCGCGGTGCATTAGCTAGTTGGTGAGGTAACGGCTCACCAAGGCCACGATGCATAGCCGACCTGAGAGGGTGATCGGCCACATTGGGACTGAGACACGGCCCAA	0	0	0	0	0	0	0	0	0	0	0	0	0	0	0	0	0	0	0	0	0	0	0	0	0	0	0	0	0	0	0	0	0	0	0	0	0	0	0	0	0	0	0	0	0	0	0	0
136	ATTGAACGCTGGCGGCATGCCTTACACATGCAAGTCGAACGGCAGCACGGGGGCAACCCTGGTGGCGAGTGGCGAACGGGTGAGTAATACATCGGAACGTGTCCTGGAGTGGGGGATAGCCCGGCGAAAGCCGGATTAATACCGCATACGCTCTGAGGAGGAAAGCGGGGGATCTTCGGACCTCGCGCTCAAGGGGCGGCCGATGGCAGATTAGGTAGTTGGTGGGGTAAAGGCCTACCAAGCCGACGATCTGTAGCTGGTCTGAGAGGACGACCAGCCACACTGGGACTGAGACACGGCCCAG	0	0	0	0	0	0	0	0	0	0	0	0	0	0	0	0	0	0	0	0	0	0	0	0	0	0	0	0	0	0	0	0	0	0	0	0	0	0	0	0	0	0	0	0	0	0	0	0
137	GACGAACGCTGACGGCGTGCTTAACACATGCAAGTCGAACGGGATCCATTAGCGCTTTTGTGTTTTTGGTGAGAGTGGCGAACGGGTGAGTAACACGTGAGTAACCTGCCCTTTTCTTTGGGATAAGCCTGGGAAACTGGGTCTAATACTGGATGTTCCGGCTTCCTCGCATGGGGTTGTTGGGAAAGGTTTTTTCTGGATTGGGATGGGCTCGCGGCTTATCAGCTTGTTGGTGGGGTGATGGCTTACCAAGGCTTTGACGGGTAGCCGGCCTGAGAGGGTGGTCGGTCACACTGGGACTGAGATACGGCCCAG	0	0	0	0	23	0	15	0	0	0	0	0	0	0	0	0	0	0	76	0	0	0	0	0	12	0	0	0	0	0	0	0	0	0	0	0	25	4	0	0	0	0	0	0	0	0	0	0
138	GATGAACGCTGGCGGCGTGCCTAATACATGCAAGTCGAGCGAACAGATAAGGAGCTTGCTCCTTTGACGTTAGCGGCGGACGGGTGAGTAACACGTGGGTAACCTACCTATAAGACTGGGATAACTTCGGGAAACCGGAGCTAATACCGGATAATATTTCGAACCGCATGGTTCGATAGTGAAAGATGGTTTTGCTATCACTTATAGATGGACCCGCGCCGTATTAGCTAGTTGGTAAGGTAACGGCTTACCAAGGCGACGATACGTAGCCGACCTGAGAGGGTGATCGGCCACACTGGAACTGAGACACGGTCCAG	0	0	0	0	0	0	0	0	0	0	0	0	0	0	0	0	0	0	0	0	3	0	0	0	0	0	0	0	0	0	0	0	0	0	0	0	0	0	0	0	0	0	0	0	0	0	0	0
139	GACGAACGCTGGCGGCGTGCCTAATACATGCAAGTCGAGCGAGCTTGCCTATAGAAATTCTTCGGAATGGACATAGATACAAGCTAGCGGCGGATGGGTGAGTAACGCGTGGGTAACCTGCCCTTAAGTCTGGGATACCATTTGGAAACAGATGCTAATACCGGATAAAAGCTACTTTCGCATGAAAGAAGTTTAAAAGGCGGCGTAAGCTGTCGCTAAAGGATGGACCTGCGATGCATTAGCTAGTTGGTAAGGCAACGGCTTACCAAGGCGATGATGCATAGCCGAGTTGAGAGACTGATCGGCCACATTGGGACTGAGACACGGCCCAA	0	0	0	0	0	0	0	0	0	0	0	0	0	0	0	0	0	0	0	0	0	0	0	0	0	0	0	0	0	0	0	0	0	0	0	0	0	0	0	0	0	0	0	0	0	0	0	0
140	AGCGAACGCTGGCGGCAGGCTTAACACATGCAAGTCGAGCGGGCGTAGCAATACGTCAGCGGCAGACGGGTGAGTAACGCGTGGGAACGTACCTTTTGGTTCGGAACAACACAGGGAAACTTGTGCTAATACCGGATAAGCCCTTACGGGGAAAGATTTATCGCCGAAAGATCGGCCCGCGTCTGATTAGCTAGTTGGTAGGGTAATGGCCTACCAAGGCGACGATCAGTAGCTGGTCTGAGAGGATGATCAGCCACATTGGGACTGAGACACGGCCCAA	0	0	0	0	0	0	0	0	0	0	0	0	0	0	0	0	0	0	0	0	0	0	0	0	0	0	0	0	0	0	0	0	0	0	0	0	0	0	10	0	29	0	0	0	0	0	0	0
141	GACGAACGCTGGCGGCGTGCCTAATACATGCAAGTCGAGCGAACAGAGAAAGTGCTTGCACTTTCAAAGTTAGCGGCGGACGGGTGAGTAACACGTAAGGAACCTACCGATAAGCGGGGGACAACATCCGGAAACGGGTGCTAATACCGCATAGGAAGTTTGTTCGCATGAACAAACTTAGAAAGATGGCTCTGCTATCACTTATCGATGGCCTTGCGGTGCATTAACTAGTTGGCGAGGTAACGGCTCACCAAGGTGATGATGCATAGCCGACCTGAGAGGGTAATCGGCCACATTGGGACTGAGACACGGCCCAA	0	0	0	0	5	0	0	0	0	0	0	0	0	0	0	0	0	0	0	0	0	0	0	0	0	0	0	0	0	0	0	0	0	0	0	0	265	21	0	0	0	0	0	0	0	0	0	89
142	GACGAACGCTGGCGGCGTGCTTAACACATGCAAGTCGAACGGAAAGGCTCCAGCTTGCTGGAGTACTCGAGTGGCGAACGGGTGAGTAACACGTGGGTAATCTGCCCTGCACTCTGGGATAAGCCTGGGAAACTGGGTCTAATACTGGATATGACCTTTCTCCTTATGGGGTTTGGTGGAAAGTTTTTCGGTGTAGGATGAGCCCGCGGCCTATCAGCTTGTTGGTGGGGTGATGGCCTACCAAGGCGACGACGGGTAGCCGGCCTGAGAGGGTGATCGGCCACATTGGGACTGAGATACGGCCCAG	0	0	0	0	0	0	0	0	0	985	0	7	0	465	10	547	0	0	0	0	0	0	0	0	0	0	120	573	0	287	0	0	0	0	318	0	0	0	0	0	0	0	0	0	0	0	0	0
143	ATTGAACGCTGGCGGCAGGCCTAACACATGCAAGTCGAACGGTAACAGGAAGCAGCTTGCTGCTTCGCTGACGAGTGGCGGACGGGTGAGTAATGTCTGGGAAACTGCCTGATGGAGGGGGATAACTACTGGAAACGGTAGCTAATACCGCATAACGTCGCAAGACCAAAGAGGGGGACCTTCGGGCCTCTTGCCATCGGATGTGCCCAGATGGGATTAGCTTGTTGGTGGGGTAACGGCTCACCAAGGCGACGATCCCTAGCTGGTCTGAGAGGATGACCAGCCACACTGGAACTGAGACACGGTCCAG	0	0	0	0	0	0	0	0	0	0	0	0	0	0	0	0	0	0	0	4	0	0	0	0	0	0	0	0	0	0	0	0	0	0	0	0	0	0	0	0	0	0	0	0	0	0	0	0
144	GACGAACGCTGGCGGCGTGCCTAATACATGCAAGTAGAACGCTGAAGAGAGGAGCTTGCTCTTCTTGGATGAGTTGCGAACGGGTGAGTAACGCGTAGGTAACCTGCCTTGTAGCGGGGGATAACTATTGGAAACGATAGCTAATACCGCATAACAATGGATGACACATGTCATTTATTTGAAAGGGGCAATTGCTCCACTACAAGATGGACCTGCGTTGTATTAGCTAGTAGGTGAGGTAATGGCTCACCTAGGCGACGATACATAGCCGACCTGAGAGGGTGATCGGCCACACTGGGACTGAGACACGGCCCAG	0	0	0	0	0	0	0	0	0	0	0	0	0	0	0	1979	0	0	0	0	0	0	0	0	0	0	0	0	0	0	0	0	0	0	0	0	0	0	0	0	0	0	0	0	0	0	0	0
145	GATGAACGCTAGCTACAGGCTTAACACATGCAAGTCGAGGGGCAGCATGGTCTTAGCTTGCTAAGGCTGATGGCGACCGGCGCACGGGTGAGTAACACGTATCCAACCTGCCGTCTACTCTTGGCCAGCCTTCTGAAAGGAAGATTAATCCAGGATGGGATCATGAGTTCACATGTCCGCATGATTAAAGGTATTTTCCGGTAGACGATGGGGATGCGTTCCATTAGATAGTAGGCGGGGTAACGGCCCACCTAGTCAACGATGGATAGGGGTTCTGAGAGGAAGGTCCCCCACATTGGAACTGAGACACGGTCCAA	0	0	0	0	0	0	0	0	0	0	0	0	0	0	0	0	0	0	0	55	0	0	0	0	0	29	0	0	0	10	0	0	0	0	0	0	0	0	0	0	0	0	0	0	0	0	0	0
146	GACGAACGCTGGCGGCGTGCCTAATACATGCAAGTTGAGCGATGAAGATTGGTGCTTGCACCAATTTGAAGAGCAGCGAACGGGTGAGTAACGCGTGGGGAATCTGCCTTTGAGCGGGGGACAACATTTGGAAACGAATGCTAATACCGCATAATAACTTTAAACATAAGTTTTAAGTTTGAAAGATGCAATTGCATCACTCAAAGATGATCCCGCGTTGTATTAGCTAGTTGGTGAGGTAAAGGCTCACCAAGGCGATGATACATAGCCGACCTGAGAGGGTGATCGGCCACATTGGGACTGAGACACGGCCCAA	0	0	0	0	0	0	0	0	0	0	0	0	0	0	0	0	0	0	0	0	0	0	0	0	0	0	0	0	0	0	0	0	0	0	0	0	0	0	0	0	0	0	0	0	0	0	0	0
147	GACGAACGCTGGCGGCGTGCCTAATACATGCAAGTCGAGCGAGCGGAACTAACAGATTTACTTCGGTAATGACGTTAGGAAAGCGAGCGGCGGATGGGTGAGTAACACGTGGGGAACCTGCCCCATAGTCTGGGATACCACTTGGAAACAGGTGCTAATACCGGCTAAGAAAGCAGATCGCATGATCAGCTTTTAAAAGGCGGCGTAAGCTGTCGCTATGGGATGGCCCCGCGGTGCATTAGCTAGTTGGTAAGGTAAAGGCTTACCAAGGCGATGATGCATAGCCGAGTTGAGAGACTGATCGGCCACATTGGGACTGAGACACGGCCCAA	0	0	0	0	0	0	0	0	0	0	0	0	0	0	0	0	0	0	0	0	0	0	0	0	0	0	0	0	0	0	0	0	0	0	0	0	0	0	0	0	0	0	0	0	0	0	0	0
148	GACGAACGCTGGCGGCGCGCTTAACACATGCAAGTCGAGCGATGAAATTTCGACAGATCCCTTCGGGGTGAAGATGAAATGGATTAGCGGCGGACGGGTGAGTAACACGTGAGTAACCTGCCTTAGACATTGGGATAGCCTCGGGAAACCGGGATTAATACCAAATGAAATCACATATGCACATGCATAAATGATCAAAGCTCCGGCGGTCTAAGATGGACTCGCGTCCCATTAGCTAGTTGGTGAGGTAACGGCCCACCAAGGCGACGATGGGTAGCCGGCCTGAGAGGGTGAACGGCCACATTGGAACTGAGAAACGGTCCAA	0	0	0	0	15	0	0	0	0	0	0	0	0	0	0	0	0	0	260	26	0	0	0	0	0	0	0	0	0	0	0	0	0	0	0	0	0	21	0	0	0	0	4	20	0	0	97	0
149	GATGAACGCTGGCGGCGTGCTTAACACATGCAAGTCGAACGGGATCCATCAGGCTTTGCTTGGTGGTGAGAGTGGCGAACGGGTGAGTAATGCGTGACCGACCTGCCCCATACACCGGAATAGCTCCTGGAAACGGGTGGTAATGCCGGATGCTCCAGTTGATCGCATGGTCTTCTGGGAAAGCTTTCGCGGTATGGGATGGGGTCGCGTCCTATCAGCTTGACGGCGGGGTAACGGCCCACCGTGGCTTCGACGGGTAGCCGGCCTGAGAGGGCGACCGGCCACATTGGGACTGAGATACGGCCCAG	0	0	0	0	0	0	0	0	0	0	0	0	0	0	0	0	0	0	0	127	0	0	0	0	0	65	0	0	0	0	0	0	0	0	0	81	10	60	0	0	0	0	0	0	0	0	0	0
150	GACGAACGCTGGCGGCGTGCCTAATACATGCAAGTCGAGCGAGCTTGCCTAGATGAATTTGGTGCTTGCACCAGATGAAACTAGATACAAGCGAGCGGCGGACGGGTGAGTAACACGTGGGTAACCTGCCCAAGAGACTGGGATAACACCTGGAAACAGATGCTAATACCGGATAACAACACTAGACGCATGTCTAGAGTTTAAAAGATGGTTCTGCTATCACTCTTGGATGGACCTGCGGTGCATTAGCTAGTTGGTAAGGCAACGGCTTACCAAGGCAATGATGCATAGCCGAGTTGAGAGACTGATCGGCCACATTGGGACTGAGACACGGCCCAA	0	0	0	0	0	0	0	0	0	0	0	0	0	0	0	0	0	0	1436	0	0	0	0	0	0	0	0	0	0	0	0	0	0	0	0	0	0	0	0	0	0	0	26	0	0	0	0	176
151	GATGAACGCTGGCGGCGTGCCTAACACATGCAAGTCGAGCGCGTCTGATTTGATGCTTGCATTAATGAAAGATGAGCGGCGGACGGGTGAGTAACGCGTGGGTAACCTGCCCTATACACATGGATAACATACTGAAAAGTTTACTAATACATGATAATATATATTTACGGCATCGTAGATATATCAAAGTGTTAGCGGTATAGGATGGACCCGCGTCTGATTAGCTAGTTGGTGAGATAACTGCCCACCAAGGCGACGATCAGTAGCCGACCTGAGAGGGTGATCGGCCACATTGGAACTGAGACACGGTCCAA	0	0	0	0	0	0	0	0	0	0	0	0	0	0	0	0	0	0	0	29	0	14	63	0	8	61	0	0	0	0	0	0	0	0	0	0	0	0	0	0	0	0	0	0	0	0	0	0
152	GATGAACGCTAGCTATAGGCTTAACACATGCAAGTCGAGGGGCAGCGAATAGATAGCTTGCTATTTATGTCGGCGACCGGCGCACGGGTGAGTAACGCGTATCCAACCTGCCCATAACTAAGGGATAACCCAGCGAAAGTTGGACTAATACCTTATGTATTCGTTTGATCTCATGAGATTACGAATAAAGATTTATCGGTTATGGATGGGGATGCGTCTGATTAGCTTGTTGGTGGGGTAACGGCCCACCAAGGCAACGATCAGTAGGGGTTCTGAGAGGAAGGTCCCCCACATTGGAACTGAGACACGGTCCAA	0	0	0	0	0	0	0	0	0	0	0	0	0	0	0	0	0	0	0	0	0	0	0	0	0	0	0	0	0	0	0	0	0	0	0	0	0	0	0	0	0	0	0	0	0	0	0	0
153	AGTGAACGCTGGCGGTAGGCCTAACACATGCAAGTCGAACGGCAGCACAGAGGAGCTTGCTCCTTGGGTGGCGAGTGGCGGACGGGTGAGGAATACATCGGAATCTACTTTTTCGTGGGGGATAACGTAGGGAAACTTACGCTAATACCGCATACGACCTACGGGTGAAAGCAGGGGATCTTCGGACCTTGCGCGATTGAATGAGCCGATGTCGGATTAGCTAGTTGGCGGGGTAAAGGCCCACCAAGGCGACGATCCGTAGCTGGTCTGAGAGGATGATCAGCCACACTGGAACTGAGACACGGTCCAG	0	0	0	0	0	0	0	0	0	0	0	0	0	210	0	0	61	0	0	0	0	0	0	0	0	13	0	0	0	77	0	0	0	0	0	0	0	0	2	0	0	0	0	0	0	0	40	0
154	GACGAACGCTGGCGGCGTGCCTAATACATGCAAGTTGAGCGCTGAAGGTTGGTACTTGTACCGACTGGATGAGCAGCGAACGGGTGAGTAACGCGTGGGGAATCTGCCTTTGAGCGGGGGACAACATTTGGAAACGAATGCTAATACCGCATAAAAACTTTAAACACAAGTTTTAAGTTTGAAAGATGCAATTGCATCACTCAAAGATGATCCCGCGTTGTATTAGCTAGTTGGTGAGGTAAAGGCTCACCAAGGCGATGATACATAGCCGACCTGAGAGGGTGATCGGCCACATTGGGACTGAGACACGGCCCAA	0	0	0	0	0	0	0	0	0	0	0	0	0	0	0	0	0	0	0	0	0	0	0	0	0	10	0	0	327	0	0	0	0	0	0	0	0	0	0	0	0	0	0	0	0	0	0	0
155	GATGAACGCTAGCTATAGGCTTAACACATGCAAGTCGAGGGGCAGCATATAGATTGCTTGCAATTTATGATGGCGACCGGCGCACGGGTGAGTAACGCGTATCCAACCTACCCATTACTAGGGAATAACCCAGCGAAAGTTGGCCTAATGCCCTATGTAGTCGTTTGATCGCCTGAGGTTTCGACGAAAGATTTATCGGTATTGGATGGGGATGCGTCTGATTAGCTTGTTGGCGGGGTAAAGGCCCACCAAGGCAACGATCAGTAGGGGTTCTGAGAGGAAGGTCCCCCACATTGGAACTGAGACACGGTCCAA	0	0	0	0	0	0	0	0	0	0	0	0	0	0	0	0	0	0	0	0	0	0	0	0	0	0	0	0	0	0	0	0	0	0	0	0	0	0	0	0	0	0	0	0	0	0	0	0
156	GACGAACGCTGGCGGCGTGCCTAATACATGCAAGTCGAGCGAGCGGAACTAACAGATTTACTTCGGTAATGACGTTAGGAAAGCGAGCGGCGGATGGGTGAGCAACACGTGGGGAACCTGCCCCATAGTCTGGGATACCACTTGGAAACAGGTGCTAATACCGGATAAGAAAGCAGATCGCATGATCAGCTTTTAAAAGGCGGCGTAAGCTGTCGCTATGGGATGGCCCCGCGGTGCATTAGCTAGTTGGTAAGGTAAAGGCTTACCAAGGCGATGATGCATAGCCGAGTTGAGAGACTGATCGGCCACATTGGGACTGAGACACGGCCCAA	0	0	0	0	0	0	0	0	0	0	0	0	0	0	0	0	0	0	0	0	0	0	0	0	0	0	0	0	0	0	0	0	0	0	0	0	0	0	0	0	0	0	0	0	0	0	33	0
157	ATTGAACGCTGGCGGCAGGCCTAACACATGCAAGTCGAACGGTAGCACAGAGAGCTTGCTCTCGGGTGACGAGTGGCGGACGGGTGAGTAATGTCTGGGAAACTGCCTGATGGAGGGGGATAACTACTGGAAACGGTAGCTAATACCGCATAACGTCGCAAGACCAAAGAGGGGGACCTTCGGGCCTCTTGCCATCAGATGTGCCCAGATGGGATTAGCTAGTAGGTGGGGTAATGGCTCACCTAGGCGACGATCCCTAGCTGGTCTGAGAGGATGACCAGCCACACTGGAACTGAGACACGGTCCAG	0	0	0	0	0	0	0	0	67	0	0	0	0	0	0	0	0	0	0	0	0	0	0	0	0	0	0	0	0	0	0	0	0	0	0	0	0	0	0	0	0	0	0	0	0	467	0	0
158	GACGAACGCTGGCGGCGTGCCTAATACATGCAAGTCGAGCGAGCTTGCCTATAGAAATTCTTCGGAATGGACATAGATACAAGCTAGCGGCGGATGGGTGAGTAACGCGTGGGTAACCTGCCCTTAAGTCTGGGATACCATTTGGAAACAGATGCTAATACCGGATAAAAGCTACTTTCGCATGAAAGAAGTTTAAAAGGCGGCGTAAGCTGTCGCTAAAGGATGGACCTGCGATGCATTAGCTAGTTGGTAAGGTAACAGCTTACCAAGGCGATGATGCATAGCCGAGTTGAGAGACTGATCGGCCACATTGGGACTGAGACACGGCCCAA	0	0	0	0	0	0	0	0	0	0	0	0	0	0	0	0	0	0	0	0	0	0	0	0	0	0	0	0	0	0	0	0	0	0	0	0	0	0	0	0	0	0	0	0	0	0	0	0
159	GACGAACGCTGGCGGCGTGCTTAACACATGCAAGTCGAGCGGTAAGGCCTTTCGGGGTACACGAGCGGCGAACGGGTGAGTAACACGTGGGTGATCTGCCCTGCACTTCGGGATAAGCCTGGGAAACTGGGTCTAATACCGGATATGACCTCCTATCGCATGGTGGGTGGTGGAAAGATTTATCGGTGCAGGATGGGCCCGCGGCCTATCAGCTTGTTGGTGGGGTAATGGCCTACCAAGGCGACGACGGGTAGCCGACCTGAGAGGGTGACCGGCCACACTGGGACTGAGACACGGCCCAG	0	0	0	0	0	0	0	137	0	0	303	0	0	0	0	0	0	0	0	0	0	0	0	0	0	0	0	0	0	0	0	0	0	107	0	0	0	0	0	0	0	0	0	0	0	0	0	0
160	ATTGAACGCTGGCGGCAGGCCTAACACATGCAAGTCGAGCGGTAGCACAGAGAGCTTGCTCTCGGGTGACGAGCGGCGGACGGGTGAGTAATGTCTGGGAAACTGCCTGATGGAGGGGGATAACTACTGGAAACGGTAGCTAATACCGCATAATGTCGCAAGACCAAAGTGGGGGACCTTCGGGCCTCATGCCATCAGATGTGCCCAGATGGGATTAGCTAGTAGGTGGGGTAACGGCTCACCTAGGCGACGATCCCTAGCTGGTCTGAGAGGATGACCAGCCACACTGGAACTGAGACACGGTCCAG	0	0	0	0	0	0	0	0	0	0	0	0	0	0	0	0	0	0	0	0	0	0	0	0	0	16	0	0	0	0	0	0	0	0	0	0	0	0	0	0	0	0	0	0	0	0	0	0
161	ATTGAACGCTGGCGGCAGGCCTAACACATGCAAGTCGAACGGTAACAGAAAGCAGCTTGCTGCTTTGCTGACGAGTGGCGGACGGGTGAGTAATGTCTGGGAAACTGCCTGATGGAGGGGGATAACTACTGGAAACGGTAGCTAATACCGCATAACGTCGCAAGACCAAAGAGGGGGACCTTCGGGCCTCTTGCCATCGGATGTGCCCAGATGGGATTAGCTTGTTGGTGGGGTAACGGCTCACCAAGGCGACGATCCCTAGCTGGTCTGAGAGGATGACCAGCCACACTGGAACTGAGACACGGTCCAG	0	0	0	0	11	0	0	0	0	0	0	0	0	0	0	0	0	0	0	23	0	0	0	0	0	0	0	0	0	0	0	0	0	0	0	0	0	0	0	0	0	0	0	0	0	0	0	0
162	GACGAACGCTGGCGGCGTGCTTAACACATGCAAGTCGAACGGGATTTAGTAGACAGAAGCTTCGGTGGAAGATTACTAATGAGAGTGGCGAACGGGTGAGTAACGCGTGAGCAACCTGCCTATGACAGTGGGATAGCCTCGGGAAACCGGGATTAATACCGCATAAAATCGTAGAAACACATGTTTTAACGGTCAAAGATTTATCGGTCATAGATGGGCTCGCGTCTGATTAGCTAGTTGGTGAGATAACAGCCCACCAAGGCGACGATCAGTAGCCGGTCTGAGAGGATGAACGGCCACATTGGAACTGAGACACGGTCCAA	0	0	0	0	0	0	0	596	0	0	0	0	0	0	0	0	0	0	0	0	0	0	0	0	0	0	114	0	0	0	0	0	0	0	0	0	0	0	0	0	0	0	0	128	55	0	0	0
163	GACGAACGCTGGCGGCGTGCCTAATACATGCAAGTCGAGCGAGTCTGCCTTGAAGATCGGAGTGCTTGCACTCTGTGAAACAAGATACAGGCTAGCGGCGGACGGGTGAGTAACACGTGGGTAACCTGCCCAAGAGATCGGGATAACACCTGGAAACAGATGCTAATACCGGATAACAACAGATGATGCCTATCAACTGTTTAAAAGATGGTTCTGCTATCACTCTTGGATGGACCTGCGGTGCATTAGCTAGTTGGTGGGGTAACGGCCTACCAAGGCGATGATGCATAGCCGAGTTGAGAGACTGATCGGCCACATTGGGACTGAGACACGGCCCAA	0	0	0	0	0	0	0	0	0	0	0	0	0	0	0	0	0	0	0	0	0	0	0	0	0	0	0	0	0	0	0	0	0	0	0	0	0	0	0	0	0	0	0	0	0	0	0	0
164	GACGAACGCTGGCGGCGTGCCTAATACATGCAAGTCGTACGCTTCTTTTTCCACCGGAGCTTGCTCCACCGGAAAAAGAGGAGTGGCGAACGGGTGAGTAACACGTGGGTAACCTGCCCATCAGAAGGGGATAACACTTGGAAACAGGTGCTAATACCGTATAACAATCGAAACCGCATGGTTTTGATTTGAAAGGCGCTTTCGGGTGTCGCTGATGGATGGACCCGCGGTGCATTAGCTAGTTGGTGAGGTAACGGCTCACCAAGGCCACGATGCATAGCCGACCTGAGAGGGTGATCGGCCACATTGGGACTGAGACACGGCCCAA	0	0	0	0	0	0	0	0	0	0	0	0	0	0	0	0	0	0	0	0	0	0	0	0	0	0	0	0	0	0	0	0	0	0	0	0	0	0	0	0	0	0	0	0	0	0	0	0
165	GATGAACGCTGGCGGCGTGCCTAATACATGCAAGTCGAGCGAACGGACGAGAAGCTTGCTTCTCTGATGTTAGCGGCGGACGGGTGAGTAACACGTGGATAACCTACCTATAAGACTGGGATAACTTCGGGAAACCGGAGCTAATACCGGATAATATTTTGAACCGCATGGTTCAAAAGTGAAAGACGGTCTTGCTGTCACTTATAGATGGATCCGCGCTGCATTAGCTAGTTGGTAAGGTAACGGCTTACCAAGGCAACGATGCATAGCCGACCTGAGAGGGTGATCGGCCACACTGGAACTGAGACACGGTCCAG	0	0	0	0	0	0	0	0	0	0	0	0	0	0	0	0	0	0	0	23	0	0	0	0	0	0	0	0	286	0	0	0	0	0	0	0	0	0	0	0	0	0	0	0	0	0	102	0
166	AACGAACGCTGGCGGCGTGCTTAACACATGCAAGTCGCGTGCGCAGTTCGCGTAGCAATACGTGGATGGGCGCACGGCGCACGGGTGCGTAACACGTGGGCAATCTGCCCTCCGATGGGGAATAACCCCGCGAAAGCGGGGCTAATACCGCATAACATTCCGAGGACTTCGGTTCTTGGATTCAAAGCAGTGATGCGTCGGAGGAGGAGCCCGCGCCCGATTAGCTAGTTGGTAGGGTAACGGCCTACCAAGGCAATGATCGGTAGCTGGTCTGAGAGGATGATCAGCCACACTGGAACTGAGACACGGTCCAG	0	0	0	0	0	0	0	258	0	0	0	0	0	0	0	0	0	0	0	0	0	43	0	0	0	0	0	1284	0	0	0	0	2	0	0	0	0	0	0	39	0	0	0	10	0	1860	0	0
167	GACGAACGCTGGCGGCGTGCCTAATACATGCAAGTCGAGCGAGTCTGCCTTGAAGATCGGAGTGCTTGCACTCTGTGAAACAAGATACAGGCTAGCGGCGGACGGGTGAGTAACACGTGGGTAACCTGCCCAAGAGATCGGGATAACACCTGGAAACAGATGCTAATACCGGATAACAACAGATGATGCCTATCAACTGTTTAAAATATGGTTCTGCTATCACTCTTGGATGGACCTGCGGTGCATTAGCTAGTTGGTAGGGTAACGGCCTACCAAGGCGATGATGCATAGCCGAGTTGAGAGACTGATCGGCCACATTGGGACTGAGACACGGCCCAA	0	0	0	0	0	0	0	0	0	0	0	0	0	0	0	0	0	0	0	79	0	0	0	0	0	63	0	0	0	0	0	0	0	0	0	0	0	0	0	0	0	0	0	0	0	0	0	0
168	ATTGAACGCTGGCGGCATGCCTTACACATGCAAGTCGAACGGCAGCACGGGGGCAACCCTGGTGGCGAGTGGCGAACGGGTGAGTAATACATCGGAACGTGTCCTGTAGTGGGGGATAGCCCGGCGAAAGCCGGATTAATACCGCATACGCTCTACGGAGGAAAGGGGGGGATCTTAGGACCTCCCGCTACAGGGGCGGCCGATGGCAGATTAGCTAGTTGGTGGGGTAAAGGCCTACCAAGGCGACGATCTGTAGCTGGTCTGAGAGGACGACCAGCCACACTGGGACTGAGACACGGCCCAG	0	0	0	0	0	0	0	0	0	0	0	0	0	0	0	0	0	0	0	0	0	0	0	0	0	0	0	0	0	0	0	0	0	0	0	0	0	0	0	0	0	0	0	0	0	0	0	0
169	GATGAACGCTGGCGGCGTGCCTAATACATGCAAGTCGAGCGAACAGACGAGGAGCTTGCTCCTTTGATGTTAGCGGCGGACGGGTGAGTAACACGTAGGTAACCTACCTATAAGACTGGGATAACTTCGGGAAACCGGAGCTAATACCGGATAATATTTCGAACCGCATGGTTCGATAGTGAAAGATGGCTTTGCTATCACTTATAGATGGACCTGCGCCGTATTAGCTAGTTGGTAAGGTAACGGCTTACCAAGGCAACGATACGTAGCCGACCTGAGAGGGTGATCGGCCACACTGGAACTGAGACACGGTCCAG	0	0	0	0	0	0	0	0	0	0	0	0	0	0	0	0	0	0	0	0	0	222	376	0	0	0	0	0	0	0	0	0	0	0	0	0	40	163	0	0	0	0	0	0	0	0	74	0
170	GATGAACGCTAGCTACAGGCTTAACACATGCAAGTCGAGGGGAAACGGCATCAAGCGCTTGCGCCTGATGGACGTCGACCGGCGCACGGGTGAGTAACGCGTATCCAACCTGCCCCACACTAAGGGATAACCCGCAGAAATGTGGACTAATACCTTATATTTTCCACCAAGGGCATCGTCGATGGAACAAAGATTTATCGGTATGGGATGGGGATGCGTCCGATTAGGTTGTTGGCGGGGTAACGGCCCACCAAGCCTTCGATCGGTAGGGGTTCTGAGAGGAAGGTCCCCCACATAGGAACTGAGACACGGTCCTA	0	0	0	0	0	0	0	0	0	0	0	0	0	0	0	0	0	0	0	0	0	0	0	0	0	0	0	0	1099	0	0	0	0	0	0	0	0	234	0	64	0	0	136	0	17	0	0	0
171	GATGAACGCTAGCTATAGGCTTAACACATGCAAGTCGAGGGGAAACGGCAAAGAGTGCTTGCACACTTTGGACGTCGACCGGCGCACGGGTGAGTAACGCGTATCCAACCTGCCCTTTACTTGGGGATAACCCGTTGAAAGACGGACTAATACCCAATGATATTCATTGATGACATCTGATTTGAATTAAAGATTTATCGGTATAGGATGGGGATGCGTCTGATTAGCTTGTTGGTGAGGTAACGGCTCACCAAGGCCACGATCAGTAGGGGTTCTGAGAGGAAGGTCCCCCACATTGGAACTGAGACACGGTCCAA	0	0	0	0	0	0	0	0	0	0	0	0	0	0	0	0	0	0	0	0	0	0	0	0	0	0	0	0	0	0	0	0	0	0	0	0	0	0	0	0	0	0	0	0	0	0	0	0
172	ATTGAACGCTGGCGGCGTGCCTAACACATGCAAGTCGAGCGGCAGCGCGGGAGCAATCCTGGCGGCGAGCGGCGGACGGGTGAGCAATGCTTGGGAATCTGCCCATCAGTGGGGGACAACCCGGGGAAACTCGGGCTAATACCGCATACGTTCTGAGGAAGAAAGCAGGGGATCGCAAGACCTTGCGCTGATGGATGAGCCCAAGTCGGATTAGCTAGTTGGTGAGGTAACGGCTCACCAAGGCGACGATCCGTAGCTGGTCTGAGAGGACGACCAGCCACACCGGAACTGAGACACGGTCCGG	0	0	0	0	0	0	0	5	0	0	0	1858	0	0	0	0	0	0	0	0	0	0	0	0	0	0	0	0	0	0	0	0	0	0	36	0	0	0	0	0	0	0	9	0	0	0	0	0
173	ATTGAACGCTGGCGGCATGCTTTACACATGCAAGTCGAACGGCAGCGAGGAGAAGCTTGCTTCTCCGTCGGCGAGTGGCGAACGGGTGAGTATAGCATCGGAACGTGCCAAATAGAGGGGGATAACCAAGCGAAAGTTTGGCTAATACCGCGTAAGCTCTAAGGAGGAAAGTAGGGGACCGCAAGGCCTTACGCTATTTGATCGGCCGATGTCGGATTAGCTAGTTGGTGAGGTAATGGCTCACCAAGGCAATGATCCGTAGCGGGTCTGAGAGGACGATCCGCCACACTGGGACTGAGACACGGCCCAG	0	0	0	0	0	0	0	0	0	0	0	0	0	0	0	0	0	0	0	0	0	0	0	0	0	0	0	0	0	0	0	0	0	0	0	0	0	0	0	0	0	0	45	0	0	0	0	0
174	GACGAACGCTGGCGGCGTGCTTAACACATGCAAGTCGAACGGGATTTAGTAAACAGAAACCTCGGTGGAAGATTACTAATGAGAGTGGCGAACGGGTGAGTAACGCGTGAGCAACCTGCCTATGACAGTGGGATAGCCTCGGGAAACCGGGATTAATACCGCATAAAATCGTAGAAACACATGTTTCAACGGTCAAAGATTTATCGGTCATAGATGGGCTCGCGTCTGATTAGCTAGTTGGTGAGATAACAGCCCACCAAGGCGACGATCAGTAGCCGGTCTGAGAGGATGAACGGCCACATTGGAACTGAGACACGGTCCAA	0	0	0	0	0	0	0	0	0	0	0	0	0	0	0	0	0	0	1041	0	0	0	0	0	0	0	0	0	0	0	0	0	0	0	0	0	0	0	0	0	0	0	0	0	0	0	66	0
175	GATGAACGCTAGCTACAGGCTTAACACATGCAAGTCGAGGGGAAACGGCATTGAGTGCTTGCACTCTTTGGACGTCGACCGGCGCACGGGTGAGTAACGCGTATCCAACCTTCCCATTACTGTGGGATAACCTGCCGAAAGGCAGACTAATACCGCATAGTCTTCGATGACGGCATCAGATTTGAAGTAAAGATTTATCGGTAATGGATGGGGATGCGTCTGATTAGCTTGTTGGCGGGGTAACGGCCCACCAAGGCAACGATCAGTAGGGGTTCTGAGAGGAAGGTCCCCCACATTGGAACTGAGACACGGTCCAA	0	0	0	0	0	0	0	0	0	0	0	0	0	0	0	0	0	0	0	50	0	0	0	0	0	20	0	0	0	0	0	0	0	0	0	0	0	0	0	0	0	0	0	0	0	0	0	0
176	ATTGAACGCTGGCGGCATGCCTTACACATGCAAGTCGGACGGCAGCGCGGGCTTCGGCCTGGCGGCGAGTGGCGAACGGGTGAGTAATACATCGGAACATGTCCAGTAGTGGGGGATAGCCCGGCGAAAGCCGGATTAATACCGCATACGATCTGTGGATGAAAGCGGGGGACCTTCGGGCCTCGCGCTATTGGGGTGGCCGATGGCGGATTAGCTAGTTGGTGGGGTAAAGGCCTACCAAGGCGACGATCCGTAGCTGGTCTGAGAGGACGACCAGCCACACTGGGACTGAGACACGGCCCAG	0	0	0	0	0	0	0	0	0	0	0	0	0	0	0	0	0	0	0	0	0	0	0	0	0	0	0	0	0	0	0	0	0	0	0	42	0	16	8	0	0	0	0	0	0	0	0	0
177	ATTGAACGCTGGCGGCAGGCCTAACACATGCAAGTCGAACGGTAACAGGAATCAGCTTGCTGATTTGCTGACGAGTGGCGGACGGGTGAGTAATGTCTGGGAAACTGCCTGATGGAGGGGGATAACTACTGGAAACGGTAGCTAATACCGCATAACGTCGCAAGACCAAAGAGGGGGACCTTCGGGCCTCTTGCCATCGGATGTGCCCAGATGGGATTAGCTAGTAGGTGGGGTAAAGGCTCACCTAGGCGACGATCCCTAGCTGGTCTGAGAGGATGACCAGCCACACTGGAACTGAGACACGGTCCAG	0	0	0	0	0	0	0	0	0	0	0	0	0	0	0	0	0	0	0	0	0	0	0	0	0	0	0	0	0	0	0	0	0	0	0	0	0	0	0	0	0	0	0	0	0	0	0	0
178	AACGAACGCTGGCGGCAGGCTTAACACATGCAAGTCGAACGCGTGTAGCAATACACGAGTGGCGCACGGGTGAGTAACGCGTGGATATCTGCCTTTTGGTTCGGAATAACCCCGGGAAACTGGGGCTAATACCGGATGGTTCCTTCGGGATAAAGATTTATCGCCAAAAGATGAGTCCGCGTACGATTAGCTAGTTGGTGAGGTAATGGCTCACCAAGGCGACGATCGTTAGCTGGTCTGAGAGGACGATCAGCCACACTGGGACTGAGACACGGCCCAG	0	0	0	0	0	0	0	0	0	0	0	0	0	0	0	0	0	0	0	0	0	0	0	0	0	0	0	0	0	0	0	0	0	0	0	0	0	0	0	0	0	0	0	0	0	0	0	0
179	GATGAACGCTAGCTACAGGCTTAACACATGCAAGTCGAGGGGCAGCATGGTCTTAGCTTGCTAAGGCCGATGGCGACCGGCGCACGGGTGAGTAACACGTATCCAACCTGCCGTCTACTCTTGGACAGCCTTCTGAAAGGAAGATTAATACAAGATGGCATCATGAGTCCGCATGTTCACATGATTAAAGGTATTCCGGTAGACGATGGGGATGCGTTCCATTAGATAGTAGGCGGGGTAACGGCCCACCTAGTCTTCGATGGATAGGGGTTCTGAGAGGAAGGTCCCCCACATTGGAACTGAGACACGGTCCAA	0	0	0	0	0	0	5	0	0	0	0	0	0	0	0	0	0	0	0	295	0	0	0	0	0	76	99	717	0	0	0	0	0	0	0	0	0	0	0	0	0	0	0	0	0	0	0	0
180	GACGAACGCTGGCGGCGTGCCTAATACATGCAAGTAGAACGCTGAAGAGAGGAGCTTGCTCTTCTTGGATGAGTTGCGAACGGGTGAGTAACGCGTAGGTAACCTGCCTTGTAGCGGGGGATAACTATTGGAAACGATAGCTAATACCGCATAACAATGGATGACACATGTCATTTATTTGAAAGGGGCAATTGCTCCACTACAAGATGGACCTGCGTTGTATTAGCTAGTAGGTGAGGTAACGGCTCACCTAGGCGACGATACATAGCCGACCTGAGAGGGTGATCGGCCACACTGGGACTGAGACACGGCCCAG	0	0	0	0	0	0	0	0	0	0	0	0	0	0	0	1585	0	0	0	65	0	0	0	0	0	103	0	26	0	0	0	0	0	0	0	0	0	0	0	0	2	0	0	0	0	0	0	0
181	GACGAACGCTGGCGGCGTGCCTAATACATGCAAGTAGAACGCTGAAGGAGGAGCTTGCTTCTCCGGATGAGTTGCGAACGGGTGAGTAACGCGTAGGTAACCTGCCTGGTAGCGGGGGATAACTATTGGAAACGATAGCTAATACCGCATAAGAGTAGATGTTGCATGACATTTGCTTAAAAGGTGCAATTGCATCACTACCAGATGGACCTGCGTTGTATTAGCTAGTTGGTGGGGTAACGGCTCACCAAGGCGACGATACATAGCCGACCTGAGAGGGTGATCGGCCACACTGGGACTGAGACACGGCCCAG	0	0	0	0	0	0	0	0	0	0	0	0	0	0	1303	3176	0	0	0	486	0	0	0	0	0	201	0	0	0	113	0	0	0	0	0	0	0	0	0	0	0	0	5	0	0	0	0	0
182	GATTAACGCTGGCGGCATGCCTAATACATGCAAATCGAACGAAGCCTTTTAGGCTTAGTGGTGAACGGGTGAGTAACACGTATCCAACCTACCCTTAAGTTGGGGATAACTAGTCGAAAGATTAGCTAATACCGAATAATAACATCAATATCGCATGAGAAGATGTAGAAAGTCGCGTTTGCGACGCTTTTGGATGGGGGTGCGACGTATCAGATAGTTGGTGAGGTAATGGCTCACCAAGTCAATGACGCGTAGCTGTACTGAGAGGTAGAACAGCCACAATGGGACTGAGACACGGCCCAG	0	0	0	0	0	193	0	0	0	0	0	0	0	0	0	0	0	0	0	0	0	0	0	0	0	0	0	0	0	0	0	0	0	0	0	0	0	0	0	0	0	0	0	0	0	0	0	0
183	ATTGAACGCTGGCGGCAGGCCTAACACATGCAAGTCGAACGGTAACAGGAAGCAGCTTGCTGCTTCGCTGACGAGTGGCGGACGGGTGAGTAATGTCTGGGAAACTGCCTGATGGAGGGGGATAACTACTGGAAACGGTAGCTAATACCGCATAACGTCGCAAGACCAAAGAGGGGGACCTTCGGGCCTCTTGCCATCGGATGTGCCCAGATGGGATTAGCTAGTAGGTGGGGTAACGGCTCACCTAGGCGACGATCCCTAGCTGGTCTGAGAGGATGACCAGCCACACTGGAACTGAGACACGGTCCAG	0	0	0	0	0	0	0	0	0	0	0	0	0	0	0	0	0	0	0	75	0	0	0	0	0	0	0	201	0	0	0	0	0	0	0	0	0	0	0	0	0	0	0	0	0	0	32	0
184	GACGAACGCTGGCGGCGTGCTTAACACATGCAAGTCGAACGGTAAGGCTCCAGCTTGCTGGGGTACACGAGTGGCGAACGGGTGAGTAACACGTGGGTGACCTGCCCTGCACTTCGGGATAAGCCTGGGAAACTGGGTCTAATACCGGATAGGACCGCACTGTGAGGGTGTGGTGGAAAGTTTTTTCGGTGTGGGATGGGCCCGCGGCCTATCAGCTTGTTGGTGGGGTAATGGCCTACCAAGGCGGCGACGGGTAGCCGGCCTGAGAGGGTGGACGGCCACATTGGGACTGAGACACGGCCCAG	0	0	0	0	0	0	0	0	0	0	0	0	0	0	0	0	0	0	0	0	0	0	0	0	0	0	0	0	0	0	0	0	0	0	0	0	0	0	0	0	0	0	0	0	0	0	0	0
185	GACGAACGCTGGCGGCGCGCTTAACACATGCAAGTCGAGCGATGAAATCTTGACAGAACCCTTCGGGGCGAAGATAAGATGGATTAGCGGCGGACGGGTGAGTAACACGTGAGTAACCTGCCTTAGACATTGGGATAGCCTCGGGAAACCGGGATTAATACCAAATGAAATCACATATGCACATGCATAAATGATCAAAGCTCCGGCGGTCTAAGATGGACTCGCGTCCCATTAGCTAGTTGGTGAGGTAACGGCCCACCAAGGCGACGATGGGTAGCCGGCCTGAGAGGGTGAACGGCCACATTGGAACTGAGAAACGGTCCAA	0	0	0	0	0	0	0	0	0	0	0	0	0	0	0	0	0	0	0	0	0	0	0	0	0	0	0	0	0	0	0	0	0	0	0	0	0	0	0	0	0	0	0	0	0	0	0	0
186	GATGAACGCCGGCGGTGTGCCTAATACATGCAAGTCGAGCGCACTGGCCCAACTGATATGACGTGCTTGCACTGAATTGACGTTGGATTCCCAGTGAGCGGCGGACGGGTGAGTAACACGTGGGCAACCTGCCCTGAAGCGGGGGATAACATCTGGAAACAGGTGCTAATACCGCATAACAACGAAAACCACATGGTTTTCGTTTCAAAGATGGTTTCGGCTATCACTTCAGGATGGGCCCGCGGTGCATTAGCTAGTTGGTAAGGTAACGGCTTACCAAGGCGATGATGCATAGCCGAGTTGAGAGACTGATCGGCCACAATGGAACTGAGACACGGTCCAT	0	0	0	0	0	0	0	0	0	0	0	0	276	0	0	0	0	446	113	0	0	0	0	0	0	0	0	0	0	0	0	0	0	0	0	0	0	0	0	0	0	0	0	0	0	0	0	0
187	AGCGAACGCTGGCGGCAGGCTTAACACATGCAAGTCGAGCGGGCGTAGCAATACGTCAGCGGCAGACGGGTGAGTAACACGTGGGAACGTACCTTTTGGTTCGGAACAACACAGGGAAACTTGTGCTAATACCGGATAAGCCCTTACGGGGAAAGATTTATCGCCGAAAGATCGGCCCGCGTCTGATTAGCTAGTTGGTGAGGTAATGGCTCACCAAGGCGACGATCAGTAGCTGGTCTGAGAGGATGATCAGCCACACTGGGACTGAGACACGGCCCAG	0	88	11	301	0	0	0	0	102	0	101	0	0	363	62	0	336	0	0	40	0	73	0	0	0	31	0	0	0	0	38	73	0	460	0	8	0	0	0	0	69	8	0	5	0	0	0	0
188	GATGAACGCTGGCGGCGTGCTTAACACATGCAAGTCGAACGGGATCCATCGGGCTTTGCTTGGTGGTGAGAGTGGCGAACGGGTGAGTAATGCGTGACCGACCTGCCCCATACACCGGAATAGCTCCTGGAAACGGGTGGTAATGCCGGATGTTCCAGTTGATCGCATGGTCTTCTGGGAAAGCTTTCGCGGTATGGGATGGGGTCGCGTCCTATCAGCTTGACGGCGGGGTAACGGCCCACCGTGGCTTCGACGGGTAGCCGGCCTGAGAGGGCGACCGGCCACATTGGGACTGAGATACGGCCCAG	0	0	0	0	0	0	0	0	0	0	0	0	0	0	0	0	0	0	0	0	0	0	0	0	0	0	0	0	0	0	0	0	0	0	0	0	0	0	0	0	0	0	0	0	0	0	0	0
189	GACGAACGCTGGCGGCGTGCCTAATACATGCAAGTCGAACGCTTCTTTCCTCCCGAGTGCTTGCACTCAATTGGAAAGAGGAGTGGCGGACGGGTGAGTAACACGTGGGTAACCTACCCATCAGAGGGGGATAACACTTGGAAACAGGTGCTAATACCGCATAACAGTTTATGCCGCATGGCATAAGAGTGAAAGGCGCTTTCGGGTGTCGCTGACGGATGGACCCGCGGTGCATTAGCTAGTTGGTGAGGTAACGGCTCACCAAGGCCACGATGCATAGCCGACCTGAGAGGGTGATCGGCCACACTGGGACTGAGACACGGCCCAG	0	0	0	0	0	0	0	0	0	0	0	0	0	0	0	0	0	0	0	0	0	0	0	0	0	0	0	0	0	0	0	0	0	0	0	0	0	0	0	0	0	0	0	0	0	0	0	0
190	GACGAACGCTGGCGGCGTGCTTAACACATGCAAGTCGAACGAAGAGCGATGGAAGCTTGCTTCTATCAATCTTAGTGGCGAACGGGTGAGTAACGCGTAATCAACCTGCCCTTCAGAGGGGGACAACAGTTGGAAACGACTGCTAATACCGCATACGATCTAATCTCGGCATCGAGGATAGATGAAAGGTGGCCTCTACATGTAAGCTATCACTGAAGGAGGGGATTGCGTCTGATTAGCTAGTTGGAGGGGTAACGGCCCACCAAGGCGATGATCAGTAGCCGGTCTGAGAGGATGAACGGCCACATTGGGACTGAGACACGGCCCAG	0	0	0	0	0	0	0	0	0	0	0	0	0	0	0	983	0	0	0	99	0	0	0	0	0	42	0	0	0	0	0	0	0	0	0	0	0	0	0	0	0	0	0	0	0	0	0	0
191	GACGAACGCTGGCGGCGCGCTTAACACATGCAAGTCGAGCGATGAAACCTTAACAGAACCCTTCGGGGCGAAGATAAGATGGATTAGCGGCGGACGGGTGAGTAACACGTGAGTAACCTGCCTTAGACATTGGGATAGCCTCGGGAAACCGGGATTAATACCAAATGAAATCACATATGCACATGCATAAATGATCAAAGCTCCGGCGGTCTAAGATGGACTCGCGTCCCATTAGCTAGTTGGTGAGGTAACGGCCCACCAAGGCGACGATGGGTAGCCGGCCTGAGAGGGTGAACGGCCACATTGGAACTGAGAAACGGTCCAA	0	0	0	0	12	0	0	0	0	0	0	0	0	0	0	0	0	0	0	0	0	0	0	0	0	10	0	0	0	0	0	0	0	0	0	0	0	0	0	70	0	0	0	5	0	0	0	0
192	ATTGAACGCTGGCGGCAGGCTTAACACATGCAAGTCGAACGGTAACAGGAATCAGCTTGCTGATTCGCTGACGAGTGGCGGACGGGTGAGTAATGTCTGGGAAACTGCCTGATGGAGGGGGATAACTACTGGAAACGGTAGCTAATACCGCATAACGTCGCAAGACCAAAGAGGGGGACCTTCGGGCCTCTTGCCATCGGATGTGCCCAGATGGGATTAGCTAGTAGGTGGGGTAACGGCTCACCTAGGCGACGATCCCTAGCTGGTCTGAGAGGATGACCAGCCACACTGGAACTGAGACACGGTCCAG	0	0	0	0	0	0	0	0	0	0	0	0	0	0	0	0	0	0	0	0	0	0	0	0	0	0	0	0	0	0	0	0	0	0	0	0	0	0	0	0	0	0	0	0	0	0	0	0
193	GATGAACGCTGGCGGCGTGCCTAATACATGCAAGTCGAGCGAACAGATAAGGAGCTTGCTCCTTTGACGTTAGCGGCGGACGGGTGAGTAACACGTGGGTAACCTACCTATAAGACTGGGACAACTTCGGGAAACCGGAGCTAATACCGGATAATATGTTGAACCGCATGGTTCAATAGTGAAAGATGGTTTTGCTATCACTTATAGATGGACCCGCGCCGTATTAGCTAGTTGGTGAGGTAACGGCTCACCAAGGCAACGATACGTAGCCGACCTGAGAGGGTGATCGGCCACACTGGAACTGAGACACGGTCCAG	0	0	0	0	10	0	0	0	0	0	0	0	0	0	0	0	0	0	0	0	0	0	0	0	0	0	0	0	4697	0	0	0	0	0	0	0	0	0	0	0	0	0	0	0	0	0	0	0
194	GATGAACGCTGGCGGCGTGCCTAATACATGCAAGTCGAGCGAACAGACGAGGAGCTTGCTCCTCTGACGTTAGCGGCGGACGGGTGAGTAACACGTGGATAACCTACCTATAAGACTGGGATAACTTCGGGAAACCGGAGCTAATACCGGATAATATATTGAACCGCATGGTTCAATAGTGAAAGACGGTTTTGCTGTCACTTATAGATGGATCCGCGCCGCATTAGCTAGTTGGTAAGGTAACAGCTTACCAAGGCAACGATGCGTAGCCGACCTGAGAGGGTGATCGGCCACACTGGAACTGAGACACGGTCCAG	0	0	0	0	0	0	0	0	0	0	0	0	0	0	0	0	0	0	0	0	0	0	0	0	0	0	0	0	0	0	0	0	0	0	0	0	0	3	0	0	0	0	0	0	0	0	0	0
195	GACGAACGCTGGCGGCGTGCCTAATACATGCAAGTCGAGCGAGCTTGCCTAGATGATTTTAGTGCTTGCACTAAATGAAACTAGATACAAGCGAGCGGCGGACGGGTGAGTAACACGTGGGTAACCTGCCCAAGAGACTGGGATAACACCTGGAAACAGATGCTAATACCGGATAACAACACTAGACGCATGTCTAGAGTTTGAAAGATGGTTCTGCTATCACTCTTGGATGGACCTGCGGTGCATTAGCTAGTTGGTAAGGTAACGGCTTACCAAGGCAATGATGCATAGCCGAGTTGAGAGACTGATCGGCCACATTGGGACTGAGACACGGCCCAA	0	0	0	0	0	0	0	0	0	0	0	0	0	0	0	0	0	0	0	0	0	0	0	0	0	0	0	0	0	0	0	0	0	0	0	0	0	0	0	0	0	0	0	0	0	0	0	0
196	GATCAACGCTGACAGAATGCTTAACACATGCAAGTCTATGAGGAAGTTTAGCTTGCTAAATGGACTCATGGCGGACGGGTGAGTAACGCGTAAAGAACTTGCCCTTTAGACTGGGATAACAGAGGGAAACTTCTGATAATACTGGATAAGTTAGTATATCGCATGATATGCAAATGAAAGCTACGGCACTAAAGGAGAGCTTTGCGTCCTATTAGCTAGTTGGTAAGGTAAGAGCTTACCAAGGCGATGATAGGTAGCCGGCCTGAGAGGGTGGACGGCCACAAGGGGACTGAGATACGGCCCTT	0	0	0	0	0	0	0	0	0	0	0	0	0	0	0	0	0	0	0	0	0	0	0	0	0	0	0	0	0	0	0	0	0	0	0	0	0	0	0	0	0	0	0	0	0	0	0	0
197	GATGAACGCTAGCGGCAGGCTTAATACATGCAAGTCGAGGGGCAGCAGCTTTATAGCAATATAGAGGCTGGCGACCGGCAAACGGGTGCGGAACACGTACACAACCTTCCTTGAATAGGGGGATAGCCCATAGAAATGTGGATTAATACCCCGTAATATAGCGGTGTGGCATCACACTGTTATTATAGTTTCGGCGATTCGAGATGGGTGTGCGGCTGATTAGGTAGTTGGCGGGGTAAAGGCCCACCAAGCCTTCGATCAGTAGCTGATGTGAGAGCATGATCAGCCACACGGGCACTGAGACACGGGCCCG	0	0	0	0	0	0	0	0	0	0	0	0	0	0	0	0	0	0	0	0	0	0	0	0	0	0	0	0	0	0	0	0	0	0	0	0	0	0	0	0	0	0	0	0	0	0	0	0
198	GATGAACGCTAGCTACAGGCTTAACACATGCAAGTCGAGGGGAAACGGCATTAAGTGCTTGCACTTTTTGGACGTCGACCGGCGCACGGGTGAGTAACGCGTATCCAACCTTCCCATGACTAAGGGATAACCTGCCGAAAGGCAGACTAATACCTTATGGTCTTCACTGACGGCATCAGATGTGAAGTAAAGATTTATCGGTTATGGATGGGGATGCGTCTGATTAGTTAGTTGGCGGGGTAACGGCCCACCAAGGCAACGATCAGTAGGGGTTCTGAGAGGAAGGTCCCCCACATTGGAACTGAGACACGGTCCAA	0	0	0	0	0	0	0	0	0	0	0	0	0	0	0	0	0	0	0	0	0	0	0	0	0	0	0	0	0	0	0	0	0	0	0	0	0	0	0	0	0	0	0	0	0	0	0	0
199	ATTGAACGCTGGCGGCAGGCCTAACACATGCAAGTCGAACGGTAACAGAAAGAAGCTTGCTTCTTTGCTGACGAGTGGCGGACGGGTGAGTAATGTCTGGGAAACTGCCTGATGGAGGGGGATAACTACTGGAAACGGTAGCTAATACCGCATAACGTCGCAAGACCAAAGAGGGGGACCTTCGGGCCTCTTGCCATCGGATGTGCCCAGATGGGATTAGCTAGTAGGTGGGGTAACGGCTCACCTAGGCGACGATCCCTAGCTGGTCTGAGAGGATGACCAGCCACACTGGAACTGAGACACGGTCCAG	0	0	0	0	0	0	0	0	0	0	0	0	0	0	0	0	0	0	0	0	0	0	0	0	0	0	0	0	0	0	0	0	0	0	0	0	0	0	0	0	0	0	0	0	0	0	0	0
200	GACGAACGCTGGCGGCGTGCCTAATACATGCAAGTCGAACGCTTCTTTTTCCACCGGAGCTTGCTCCACCGGAAAAAGAGGAGTGGCGAACGGGTGAGTAACACGTGGGTAACCTGCCCATCAGAAGGGGATAACACTTGGAAACAGGTGCTAATACCGTATAACAATCGAAACCGCATGGTTTTGATTTGAAAGGCGCTTTCGGGTGTCGCTGATGGATGGACCCGCGGTGCATTAGCTAGTTGGTGAGGTAACGGCTCACCAAGGCCACGATGCATAGCCGACCTGAGAGGGTGATCGGCCACATTGGGACTGAGACACGGCCCAA	0	0	0	0	0	0	22	0	0	0	0	0	0	0	0	0	0	0	0	0	0	0	0	0	0	0	0	0	0	0	0	0	0	0	0	0	0	0	0	0	0	0	0	0	0	0	0	0
201	GACGAACGCTGGCGGCGTGCCTAATACATGCAAGTCGAGCGAGCTTGCCTAGATGAATTTGGTGCTTGCACCAGATGAAACTAGATACAAGCGAGCGGCGGACGGGTGAGTAACACGTGGGTAACCTGCCCAAGAGACTGGGATAACACCTGGAAACAGATGCTAATACCGGATAACAACACTAGACGCATGTCTAGAGGTTAAAAGATGGTTCTGCTATCACTCTTGGATGGACCTGCGGTGCATTAGCTAGTTGGTAAGGCAACGGCTTACCAAGGCAATGATGCATAGCCGAGTTGAGAGACTGATCGGCCACATTGGGACTGAGACACGGCCCAA	0	0	0	0	0	0	0	0	0	0	0	0	0	0	0	0	0	0	0	0	0	0	0	0	0	0	0	0	0	0	0	0	0	0	0	0	0	0	0	0	0	0	0	0	0	0	233	3706
202	GATGAACGCTGGCGGCGTGCCTAATACATGCAAGTCGAGCGAACAGACGAGGAGCTTGCTCCTCTGACGTTAGCGGCGGACGGGTGAGTAACACGTGGATAACCTACCTATAAGACTGGGATAACTTCGGGAAACCGGAGCTAATACCGGATAATATATTGAACCGCATGGTTCAATAGTGAAAGACGGTTTTGCTGTCACTTATAGATGGATCCGCGCCGCATTAGCTAGTTGGTAAGGTAACGGCTTACCAAGGCAACGATGCGTAGCCGACCTGAGAGGGTGATCGGCCACACTGGAACTGAGACACGGTCCAA	0	0	0	0	0	0	0	0	0	0	0	0	0	0	0	0	0	0	0	0	0	0	0	0	0	0	0	0	0	0	0	0	0	0	0	0	0	0	0	0	0	0	0	0	0	0	0	0
203	GATGAACGCTAGCTATAGGCTTAACACATGCAAGTCGAGGGGCAGCGAATAGATAGCTTGCTATTTATGTCGGCGACCGGCGCACGGGTGAGTAACGCGTATCCAACCTGCCCATAACTAAGGGATAACCCAGCGAAAGTTGGACTAATACCTTATGTATTCGTTTGATCTCATGAGATTATGAATAAAGATTTATCGGTTATGGATGGGGATGCGTCTGATTAGCTTGTTGGCGGGGTAACGGCCCACCAAGGCAACGATCAGTAGGGGTTCTGAGAGGAAGGTCCCCCACATTGGAACTGAGACACGGTCCAA	0	0	0	0	0	0	0	0	0	0	0	0	0	0	0	0	0	0	0	0	0	0	0	0	0	0	0	0	0	0	0	0	0	0	0	0	0	0	0	0	0	0	0	0	0	0	0	0
204	GATGAACGCTGGCGGCGCGCCTAACACATGCAAGTCGAACGATTAAAGCACCTTCGGGTGTGTATAAAGTGGCGAACGGCTGAGTAACACGTGGGCAACCTGCCCCTCTCATTGGGATAGCCACGGGAAACCGTGGATAATACCGAATACTTCGAGACTTCCGCATGGAAGACTCGAGAAAGCTCCGGCGGAGAGGGATGGGCCCGCGGCCTGTTAGCTTGTTGGTGGGGTAACGGCCTACCAAGGCAATGATGGGTAGCTGGGTTGAGAGACCGACCAGCCAGATTGGGACTGAGACACGGCCCAG	0	0	0	0	0	0	0	0	0	0	0	0	0	0	0	0	0	0	0	0	0	0	0	0	0	0	0	0	0	0	0	0	0	0	0	0	0	0	0	0	0	0	0	0	0	0	0	0
205	ATTGAACGCTGGCGGCAGGCCTAACACATGCAAGTCGAACGGTAACAGGAAGCAGCTTGCTGCTTCGCTGACGAGTGGCGGACGGGTGAGTAATGTCTGGGAAACTGCCTGATGGAGGGGGATAACTACTGGAAACGGTAGCTAATACCGCATAATGTCGCAAGACCAAAGAGGGGGGACCTTCGGGCCTCTTGCCATCGGATGTGCCCAGATGGGATTAGCTTGTTGGTGGGGTAACGGCTCACCAAGGCGACGATCCCTAGCTGGTCTGAGAGGATGACCAGCCACACTGGAACTGAGACACGGTCCAG	0	0	0	0	0	0	0	0	0	0	0	0	0	0	0	0	0	0	0	0	0	0	0	0	0	0	0	0	0	0	0	0	0	0	0	0	0	0	0	0	0	0	0	0	0	0	0	0
206	GACGAACGCTGGCGGCGTGCTTAACACATGCAAGTCGAGCGGTAAGGCCCTTTCGGGGGTACACGAGCGGCGAACGGGTGAGTAACGCGTGAGTAACCTGCCCCCCTCTCTGGGATAACAGTTGGAAACGGCTGCTAATACCGGATATTCAGACCTTTAGGCATCTTTTGGTTTGGAAAGTTCTGGCGGTGGGGGATGGACTCGCGTCCTATCAGCTTGTTGGTGGGGTAGTGGCCTACCAAGGCGACGACGGGTAGCCGGCCTGAGAGGGCGACCGGCCACATTGGGACTGAGATACGGCCCAA	0	0	0	0	0	0	0	0	0	0	0	0	0	0	0	0	0	0	87	0	0	0	0	0	0	0	0	0	0	0	0	0	0	0	0	0	6	59	0	0	0	0	0	0	0	0	159	0
207	GACGAACGCTGGCGGCGTGCTTAACACATGCAAGTCGAACGGAAAGGCCCTGCTTGCAGGGTACTCGAGTGGCGAACGGGTGAGTAACACGTGGGTGATCTGCCCTGCACTTCGGGATAAGCTTGGGAAACTGGGTCTAATACCGGATAGGACCGCACTTTAGTGTGTGTGGTGGAAAGTTTTTTCGGTGTAGGATGAGCTCGCGGCCTATCAGCTTGTTGGTGGGGTAATGGCCTACCAAGGCGGCGACGGGTAGCCGGCCTGAGAGGGTGTACGGCCACATTGGGACTGAGATACGGCCCAG	0	0	0	0	0	0	0	0	0	0	0	0	0	0	0	0	0	0	0	0	0	0	0	0	0	0	0	0	0	0	0	0	0	0	0	0	0	0	0	0	0	0	0	0	0	0	0	0
208	GACGAACGCTGGCGGCGTGCTTAACACATGCAAGTCGTACGGTAAGGCCCTTTCGGGGGTACACGAGTGGCGAACGGGTGAGTAACACGTGAGTAACCTGCCCACAACTTTGGGATAACGCTAGGAAACTGGTGCTAATACTGGATATGTGCTCCTGCTGCATGGTGGGGGTTGGAAAGCTCCGGCGGTTGTGGATGGACTCGCGGCCTATCAGCTTGTTGGTGGGGTAGTGGCCTACCAAGGCGGCGACGGGTAGCCGGCCTGAGAGGGTGACCGGCCACATTGGGACTGAGATACGGCCCAG	0	0	0	0	0	0	0	0	0	0	0	0	0	738	0	0	0	0	0	27	0	0	86	0	0	0	0	0	0	0	0	661	0	168	0	0	17	118	0	0	0	0	0	0	0	0	0	0
209	GATGAACGCTAGCTACAGGCTTAACACATGCAAGTCGAGGGGAAACGGCATTAAGTGCTTGCACTTTTTGGACGTCGACCGGCGCACGGGTGAGTAACGCGTATCCAACCTTCCCATGACTAAGGGATAACCTGCCGAAAGGCAGACTAATACCTTATGGTCTTCACTGACGGCATCAGATGTGAAGTAAAGATTTATCGGTTATGGATGGGGATGCGTCTGATTAGCTTGTTGGCGGGGTAACGGCCCACCAAGGCGACGATCAGTAGGGGTTCTGAGAGGAAGGTCCCCCACATTGGAACTGAGACACGGTCCAA	0	0	0	0	0	0	0	0	0	0	0	0	0	0	0	0	0	0	0	0	0	0	0	0	0	0	0	0	0	0	0	0	0	0	0	0	0	0	0	0	0	0	0	0	0	0	0	0
210	GATGAACGCTGGCGGCGTGCCTAACACATGCAAGTCGAGCGCGTCTGATTTGATGCTTGCATTGATGAAAGATGAGCGGCGGACGGGTGAGTAACGCGTGGGTAACCTGCCCTATACACATGGATAACATACTGAAAAGTTTACTAATACATGATAATATATATTTACGGCATCGTAGATATATCAAAGTGTTAGCGGTATAGGATGGACCCGCGTCTGATTAGCTAGTTGGTGAGATAACTGCCCACCAAGGCGACGATCAGTAGCCGACCTGAGAGGGTGATCGGCCACATTGGAACTGAGACACGGTCCAA	0	0	0	0	0	0	0	0	0	0	0	0	0	0	0	0	0	0	0	0	0	0	0	0	0	0	0	0	0	0	0	0	0	0	0	0	0	0	0	0	0	0	52	0	0	0	0	0
211	GACGAACGCTGGCGGCGTGCCTAATACATGCAAGTCGAGCGAGTCTGCCTTGAAGATCGGAGTGCTTGCACTCTGTGAAACAAGATACAGGCTAGCGGCGGACGGGTGAGTAACACGTGGGTAACTTGCCCAAGAGATCGGGATAACACCTGGAAACAGATGCTAATACCGGATAACAACAGATGATGCCTATCAACTGTTTAAAAGATGGTTCTGCTATCACTCTTGGATGGACCTGCGGTGCATTAGCTAGTTGGTAGGGTAACGGCCTACCAAGGCGATGATGCATAGCCGAGTTGAGAGACTGATCGGCCACATTGGGACTGAGACACGGCCCAA	0	0	0	0	0	0	0	0	0	0	0	0	0	0	0	0	0	0	0	0	0	0	0	0	0	0	0	0	0	0	0	0	0	0	0	0	0	0	0	0	0	0	0	0	0	0	0	0
212	GATAAACGCTGGCGGCGTGCATAACACATGCAAGTCGAACGATGAAACTTAGATGATTTCTTCGGAATGAACTTAAGCGGATTAGTGGCGAACGGGTGAGTAACACGTGAGTAACCTGCCTTACACAAGGGGATAGCCTTTGGAAACGAAGAATAATACCCTATAAAGTCAATTTATCGCATGATAGAATGACCAAAGATTTATCGGTGTAAGATGGACTTGCGTCTGATTAGCTAGTTGGTGAGATAAAGGCCCACCAAGGCAACGATCAGTAGCCGGCTTGAGAGAGTGTACGGCCACATTGGGACTGAGACACGGCCCAA	0	0	0	0	0	0	0	0	0	0	0	0	0	0	0	0	0	0	0	0	0	0	0	0	0	0	0	0	0	0	0	0	0	0	0	0	0	0	0	0	0	0	0	0	0	0	0	0
213	GATGAACGCTAGCTATAGGCTTAACACATGCAAGTCGAGGGGCAGCGAATAGATAGCTTGCTATTTATGTCGGCGACCGGCGCACGGGTGAGTAACGCGTATCCAACCTACCCATAACTAAGGGATAACCCAGCGAAAGTTGGACTAATACCTTATGTATTCGTTTGATCTCATGAGATTATGAATAAAGATTTATCGGTTATGGATGGGGATGCGTCTGATTAGCTTGTTGGCGGGGTAACGGCCCACCAAGGCAACGATCAGTAGGGGTTCTGAGAGGAAGGTCCCCCACATTGGAACTGAGACACGGTCCAA	0	0	0	0	0	0	0	0	0	0	0	0	0	0	0	0	0	0	0	0	0	0	0	0	0	0	0	0	0	0	0	0	0	0	0	0	0	0	0	0	0	0	0	0	0	0	0	0
214	GACGAACGCTGGCGGCGTGCCTAATACATGCAAGTCGAGCGAGCTTGCCTATAGAAGTTCTTCGGAATGGACATAGATACAAGCTAGCGGCGGATGGGTGAGTAACGCGTGGGTAACCTGCCCTTAAGTCTGGGATACCATTTGGAAACAGATGCTAATACCGGATAAAAGCTACTTTCGCATGAAAGAAGTTTAAAAGGCGGCGTAAGCTGTCGCTAAAGGATGGACCTGCGATGCATTAGCTAGTTGGTAAGGTAACGGCTTACCAAGGCGATGATGCATAGCCGAGTTGAGAGACTGATCGGCCACATTGGGACTGAGACACGGCCCAA	0	0	0	0	0	0	0	0	0	0	0	0	0	0	0	0	0	0	0	0	0	0	0	0	0	0	0	0	0	0	0	0	0	0	0	0	0	0	0	0	0	0	0	0	0	0	0	0
215	GATGAACGCTGGCGGCGTGCCTAATACATGCAAGTCGAGCGAACAGACAAGGAGCTTGCTCCTTTGACGTTAGCGGCGGACGGGTGAGTAACACGTGGGTAACTTACCTATAAGACTGGGATAACTTCGGGAAACCGGAGCTAATACCGGATAATATTTCGAACCGCATGGTTCGATAGTGAAAGATGGTTTTGCTATCACTTATAGATGGACCCGCGCCGTATTAGCTAGTTGGTAAGGTAACGGCTTACCAAGGCGACGATACGTAGCCGACCTGAGAGGGTGATCGGCCACACTGGAACTGAGACACGGTCCAG	0	0	0	0	0	0	0	0	0	0	0	0	0	0	0	0	0	0	0	0	0	0	0	0	0	0	0	0	0	0	0	0	0	0	0	0	0	0	0	0	0	0	0	0	0	0	0	0
216	GATTAACGCTGGCGGCGTGCATAACACATGCAAGTCGAACGATGAAACTTAAATGAACTCTTCGGAGTGATTTTAAGTGGATTAGTGGCGGACGGGTGAGTAACGCGTGAGTAACCTGCCTTAGAGAAGGGGATAGCCTTTGGAAACGAAGAATAATACCCTATAACACCAACACCTCGCATGAAGAGTTGGTCAAAGATTTATCGCTCTAAGATGGACTTGCGTCTGATTAGTTAGTTGGTGAGGTAACGGCCCACCAAGACAGCGATCAGTAGCCGGCTTGAGAGAGTGTACGGCCACATTGGGACTGAGACACGGCCCAG	0	0	0	0	0	0	0	0	0	0	0	0	0	0	0	0	0	0	247	0	0	0	0	0	0	0	0	0	0	0	0	0	0	0	0	0	0	0	0	0	0	0	0	0	0	0	0	0
217	ATTGAACGCTGGCGGCAGGCTTAACACATGCAAGTCGAGCGGAGAGAGGTAGCTTGCTACCGATCTTAGCGGCGGACGGGTGAGTAATGCTTAGGAATCTGCCTATTAGTGGGGGACAACATTTCGAAAGGAATGCTAATACCGCATACGTCCTACGGGAGAAAGCAGGGGATCTTCGGACCTTGCGCTAATAGATGAGCCTAAGTCGGATTAGCTAGTTGGTGGGGTAAAGGCCTACCAAGGCGACGATCTGTAGCGGGTCTGAGAGGATGATCCGCCACACTGGGACTGAGACACGGCCCAG	0	0	0	0	0	0	0	0	0	0	0	0	0	0	0	0	0	0	0	0	0	0	0	0	0	0	0	0	0	0	0	0	0	0	0	0	0	0	0	0	0	0	0	0	0	0	0	0
218	GATGAACGCTGGCGGCGTGCCTAATACATGCAAGTCGAGCGAACAGACGAGGAGCTTGCTCCTCTGACGTTAGCGGCGGACGGGTGAGTAACACGTGGATAACCTACCTATAAGACTGGGATAACTTCGGGAAACCGGAGCTAATACCGGATAATATATTGAACCGCATGGTTCAATAGTGAAAGACGGTTTTGCTGTCACTTATAGATGGATCCGCGCCGCATTAGCTAGTTGGTAGGGTAACGGCTTACCAAGGCGACGATGCGTAGCCGACCTGAGAGGGTGATCGGCCACACTGGAACTGAGACACGGTCCAG	0	0	0	0	0	0	0	0	0	0	0	0	0	0	0	0	0	0	0	17	0	0	0	0	0	0	0	0	0	0	0	0	0	0	0	0	0	0	0	0	0	0	0	0	0	0	0	0
219	AGCGAACGTTAGCGGCGCGCCTAACACATGCAAGTCGCACGAGAAAGGGGTTCGCCCCCGGTACAGTGGCGCACGGGTGAGTAACACGTGGACGACCTTCCCAGACGTGGGGGATAACCTGCCGAAAGGCGGGCTAATACCGCATGAGACCCTTGGTTTACGGATCAGGGGTGAAAGCAGGCTGAGGTTTACAAGCTTGCGCGTTTGGATGGGTCCGCGTCCCATCAGCTAGTTGGTGAGGTAAAGGCTCACCAAGGCGACGACGGGTAGCTGGTCTGAGAGGATAGCCAGCCACACTGGAACTGAGACACGGTCCAG	0	0	0	0	0	0	0	5	0	0	0	1539	0	0	0	508	82	0	0	52	0	0	37	0	0	0	0	30	0	0	0	75	0	0	0	0	0	0	0	0	0	0	0	5	0	0	80	0
220	AACGAACGCTGGCGGCGCGCTTAACACATGCAAGTCGAACGAGAAGGCGTAGCAATACGCTTGTAGAGTGGCGAACGGGTGAGGAATACATGGGTAACCTACCCTCGAGAGGGGAATAACCAGCCGAAAGGTTGGCTAATGCCGCGTACGCTTCCCAGTCTGCGGATTGGGAAGGAAAGCTCTGCCGTGGGCAGGGCGCTCAAGGATGGGCTCATGTCCTATCAGCTTGTTGGTGAGGTAACGGCTCACCAAGGCTTCGACGGGTAGCTGGTCTGAGAGGACGATCAGCCACACTGGCACTGCGACACGGGCCAG	0	0	0	0	0	0	0	0	0	0	0	0	0	0	0	0	0	0	0	0	0	0	0	0	0	0	0	0	0	0	0	0	0	0	0	0	0	0	0	0	0	0	0	0	0	0	0	0
221	ATTGAACGCTGGCGGCAGGCCTAACACATGCAAGTCGAACGGTAACAGGAAGCAGCTTGCTGCTTTGCTGACGAGTGGCGGACGGGTGAGTAATGTCTGGGAAACTGCCTGATGGAGGGGGATAACTACTGGAAACGGTAGCTAATACCGCATAACGTCGCAAGACCAAAGAGGGGGACCTTCGGGCCTCTTGCCATCGGATGTGCCCAGATGGGATTAGCTTGTTGGTGGGGTAACGGCTCACCAAGGCGACGATCCCTAGCTGGTCTGAGAGGATGACCAGCCACACTGGAACTGAGACACGGTCCAG	0	0	0	0	0	0	0	0	0	0	0	0	0	0	0	0	0	0	0	0	0	0	0	0	0	0	0	0	0	0	0	0	0	0	0	0	0	0	0	0	0	0	0	0	0	0	0	0
222	GATGAACGCTGGCGGCGTGCCTAATACATGCAAGTCGAGCGAACAGACGAGGAGCTTGCTCCTTTGACGTTAGCGGCGGACGGGTGAGTAACACGTGGGTAACCTACCTATAAGACTGGGATAACTTCGGGAAACCGGAGCTAATACCGGATAATATTTCGAACCGCATGGTTCGATAGTGAAAGATGGCTTTGCTATCACTTATAGATGGACCTGCGCCGTATTAGCTAGTTGGTAAGGTAACGGCTTACCAAGGCAACGATACGTAGCCGACCTGAGAGGGTGATCGGCCACACTGGAACTGAGACACGGTCCAG	0	0	0	0	0	0	0	208	0	0	0	0	0	0	0	0	194	0	0	0	0	104	98	0	0	0	0	0	0	0	0	0	0	0	0	0	0	110	0	46	0	0	0	0	0	0	0	0
223	GATGAACGCCGGCGGTGTGCCTAATACATGCAAGTCGAGCGCACTGGCCCAACTGATATGACGTGCTTGCACTGAATTGACGTTGGATTACCAGTGAGCGGCGGACGGGTGAGTAACACGTGGGCAACCTGCCCTGAAGTGGGGGATAACATCTGGAAACAGGTGCTAATACCGCATAACAACGAAAACCACATGGTTTTCGTTTCAAAGATGGTTTCGGCTATCACTTCAGGATGGGCCCGCGGTGCATTAGCTAGTTGGTAAGGTAACGGCTTACCAAGGCAATGATGCATAGCCGAGTTGAGAGACTGATCGGCCACAATGGAACTGAGACACGGTCCAT	0	0	0	0	0	0	0	0	0	0	0	0	0	0	0	0	0	0	0	22	0	0	0	0	0	0	0	0	0	0	0	0	0	0	0	0	0	0	0	0	0	0	0	0	0	0	0	0
224	GATGAACGCTAGCGGCAGGCCTAATACATGCAAGTCGAACGGCAGCGGGTCCAGCAATGGATGCCGGCGAGTGGCGCACGGGTGCGTAACACGTATGCAATCTACCTGTAACTTAGGGATAGCCCGGAGAAATTCGGATTAATACCTAATGATAACCGAGACTGGCATCAGTTTTTGTTTAAAGATTTATCGGTTACAGATGAGCATGCGTCTGATTAGTTAGTTGGTGAGGTAACGGCTCACCAAGACGATGATCAGTAGGGGACCTGAGAGGGCGATCCCCCACACTGGTACTGAGATACGGACCAG	0	0	0	0	0	0	0	0	0	0	207	0	0	0	0	0	0	0	0	0	0	0	0	0	0	0	0	0	0	0	0	0	0	0	0	0	0	0	0	0	0	0	0	0	0	0	0	0
225	ATTGAACGCTGGCGGCGTGCCTAACACATGCAAGTCGAGCGGCAGCGCGGGAGCAATCCTGGCGGCGAGCGGCGGACGGGTGAGCAATGCTTGGGAATCTGCCCATCAGTGGGGGACAACCCGGGGAAACTCGGGCTAATACCGCATACGTTCTTTGGAAGAAAGCAGGGGACCGCAAGGCCTTGCGCTGATGGATGAGCCCAAGTCGGATTAGCTAGTTGGTGAGGTAACGGCTCACCAAGGCGACGATCCGTAGCTGGTCTGAGAGGACGACCAGCCACACCGGAACTGAGACACGGTCCGG	0	0	0	0	0	0	0	0	0	0	0	0	0	0	0	0	0	0	0	0	0	0	0	0	0	0	0	602	291	0	0	0	0	0	0	0	0	0	0	0	0	0	0	0	0	0	156	0
226	AGCGAACGTTAGCGGCAGGCTTAACACATGCAAGTCGAGCGAGAACAGGGCTTCGGCCCCTAGTAAAGCGGCGGACGGGTGAGTAACACGTGGGTAATGTGCCCTTCAGCGGGGGATAACAGTCCGAAAGGATTGCTAATACCGCATACGTCGGCCGGATCTCCGGATCTGGTCGGGAAAGGTGGCCTCTCCATGGAAGCTACCACTGAAGGAGCAGCCCGCGGCCCATCAGCTAGTTGGCGGGGTAACGGCCCACCAAGGCTAAGACGGGTAGCTGGTCTGAGAGGATGATCAGCCACACTGGAACTGAGACACGGTCCAG	0	0	0	0	0	0	0	189	47	0	187	0	0	0	0	0	0	0	0	0	0	0	0	0	0	0	0	0	809	0	0	0	0	145	0	0	0	0	0	0	0	0	0	0	0	0	0	0
227	ATTGAACGCTGGCGGCATGCCTTACACATGCAAGTCGAACGGCAGCGCGGGAGCAATCCTGGCGGCGAGTGGCGAACGGGTGAGTAATACATCGGAACGTGTCCTGGAGTGGGGGATAGCCCGGCGAAAGCCGGATTAATACCGCATACGCTCTGAGGAGGAAAGCGGGGGATCTTCGGACCTCGCGCTCAAGGGGCGGCCGATGGCAGATTAGGTAGTTGGTGGGGTAAAGGCCTACCAAGCCGACGATCTGTAGCTGGTCTGAGAGGACGACCAGCCACACTGGGACTGAGACACGGCCCAG	0	0	0	0	0	0	0	0	0	0	0	0	0	0	0	0	0	0	0	0	0	0	0	0	0	0	0	0	0	0	0	0	0	0	0	17	0	10	7	0	0	0	0	0	0	0	81	0
228	GACGAACGCTGGCGGCGTGCCTAATACATGCAAGTTGAGCGCTGAAGGTTGGTACTTGTACCAACTGGATGAGCAGCGAACGGGTGAGTAACGCGTGGGGAATCTGCCTTTGAGCGGGGGACAACATTTGGAAACGAATGCTAATACCGCATAAAAACTTTAAACACAAGTTTTAAGTTTGAAAGATGCAATTGCATCACTCAAAGATGATCCCGCGTTGTATTAGCTAGTTGGTGAGGTAAAGGCTCACCAAGGCGATGATACATAGCCGACCTGAGAGGGTGATCGGCCACATTGGGACTGAGACACGGCCCAA	0	0	0	0	0	0	0	0	0	0	0	0	0	0	0	0	0	0	0	0	0	0	0	0	0	0	0	0	0	0	0	0	0	0	0	0	0	0	0	0	0	0	0	0	0	0	0	0
229	GATGAACGCTAGCTACAGGCTTAACACATGCAAGTCGAGGGGAAACGGCATTAAGTGCTTGCACTTTTTGGACGTCGACCGGCGCACGGGTGAGTAACGCGTATCCAACCTGCCCCTTACCAGGGAATAACCCGTTGAAAGACGGACTAATGCCCTATGGAGTCCTTTGACGGCATCAGATTAGGACTAAAGATTCATCGGTATGGGATGGGGATGCGTCTGATTAGCTTGTTGGCGGGGTAACGGCCCACCAAGGCATCGATCAGTAGGGGTTCTGAGAGGAAGGTCCCCCACATAGGAACTGAGACACGGTCCTA	0	0	0	0	0	0	0	0	0	0	0	0	0	0	0	0	0	0	0	0	0	0	0	0	0	0	0	0	0	0	0	0	0	0	0	0	0	36	0	0	0	0	179	0	0	0	0	0
230	ATTGAACGCTGGCGGCAGGCTTAACACATGCAAGTCGAACGGTAACATAAAGAAGCTTGCTTCTTTGATGACGAGTGGCGGACGGGTGAGTAATGCTTGGGAATCTAGCTTATGGAGGGGGATAACTACGGGAAACTGTAGCTAATACCGCGTAATATCGAAAGATTAAAGTGTGGGACCTTCGGGCCACATGCCATAGGATGAGCCCAAGTGGGATTAGGTAGTTGGTGAGGTAAAGGCTCACCAAGCCGACGATCTCTAGCTGGTCTGAGAGGATGACCAGCCACACTGGGACTGAGACACGGCCCAG	0	0	0	0	0	0	0	0	0	0	0	0	0	0	0	0	0	0	0	18	0	0	0	0	0	18	0	0	0	0	0	0	0	0	0	0	0	0	0	0	0	0	0	0	2	0	0	0
231	GATGAACGCTGGCGGCGTGCCTAATACATGCAAGTCGAGCGAACAGACAAGGAGCTTGCTCCTTTGACGTTAGCGGCGGACGGGTGAGTAACACGTGGGTAACCTACCTATAAGACTGGGATAACTTCGGGAAACCGGAGCTAATACCGGATAATATTTCGAACCGCATGGTTCGATAGTGAAAGATGGTTTTGCTATCACTTATAGATGGACCCGCGCCGTATTAGCTAGTTGGTAAGGTAACGGCTTACCAAGGCGACGATACGTAGCCGACCTGAGAGTGTGATCGGCCACACTGGAACTGAGACACGGTCCAG	0	0	0	0	0	0	0	0	0	0	0	0	0	0	0	0	0	0	0	0	0	0	0	0	0	0	0	0	0	0	0	0	0	0	0	0	0	0	0	0	0	0	0	0	0	0	0	0
232	GACGAACGCTGGCGGCGTGCCTAATACATGCAAGTCGAACGCTTCTTTTTCCACCGGAGCTTGCTCCACCGGAAAAAGAGGAGTGGCGAACGGGTGAGTAACACGTGGGTAACCTGCCCATCAGAAGGGGATAACACTTGGAAACAGGTGCTAATACCGTATAACAATCAAAACCGCATGGTTTTGATTTGAAAGGCGCTTTCGGGTGTCGCTGATGGATGGACCCGCGGTGCATTAGCTAGTTGGTGAGGTAACGGCTCACCAAGGCCACGATGCATAGCCGACCTGAGAGGGTGATCGGCCACATTGGGACTGAGACACGGCCCAA	0	0	0	0	0	0	0	0	0	0	0	0	0	0	0	0	0	0	0	0	0	0	0	0	0	0	0	0	0	0	0	0	0	0	0	0	0	0	0	0	0	0	0	0	0	0	0	0
233	GACGAACGCTGGCGGCGTGCCTAATACATGCAAGTCGAGCGAGCTTGCCTAGATGAATTTGGTGCTTGCACCAAATGAAACTAGATACAAGCGAGCGGCGGACGGGTGAGTAACACGTGGGTAACCTGCCCAAGAGACTGGGATAACACCTGGAAACAGATGCTAATACCGGATAACAACACTAGACGCATGTCTAGAGGTTAAAAGATGGTTCTGCTATCACTCTTGGATGGACCTGCGGTGCATTAGCTAGTTGGTAAGGCAACGGCTTACCAAGGCAATGATGCATAGCCGAGTTGAGAGACTGATCGGCCACATTGGGACTGAGACACGGCCCAA	0	0	0	0	0	0	0	0	0	0	0	0	0	0	0	0	0	0	0	0	0	0	0	0	0	0	0	0	0	0	0	0	0	0	0	0	0	0	0	0	0	0	0	0	0	0	89	3266
234	GACGAACGCTGGCGGCGTGCTTAACACATGCAAGTCGAACGGGATTTAGTAGACAGAAGCCTCGGTGGAAGATTACTAATGAGAGTGGCGAACGGGTGAGTAACGCGTGAGCAACCTGCCTATGACAGTGGGATAGCCTCGGGAAACCGGGATTAATACCGCATAAAATCGTAGAAACACATGTTTCAACGGTCAAAGATTTATCGGTCATAGATGGGCTCGCGTCTGATTAGCTAGTTGGTGAGATAACAGCCCACCAAGGCGACGATCAGTAGCCGGTCTGAGAGGATGAACGGCCACATTGGAACTGAGACACGGTCCAA	0	0	0	95	49	0	100	0	0	0	0	0	0	0	0	0	0	0	0	0	0	0	0	0	0	0	0	0	0	0	0	0	0	0	0	0	0	200	0	0	0	0	0	0	0	0	0	0
235	GACGAACGCTGGCGGCGTGCTTAACACATGCAAGTCGAACGGGATTTAGTAAACGGAAACCTCGGTGGAAGATTACTAATGAGAGTGGCGAACGGGTGAGTAACGCGTGAGCAACCTGCCTATGACAGTGGGATAGCCTCGGGAAACCGGGATTAATACCGCATAAAATCGTAGAAACACATGTTTCAACGGTCAAAGATTTATCGGTCATAGATGGGCTCGCGTCTGATTAGCTAGTTGGTGAGATAACAGCCCACCAAGGCGACGATCAGTAGCCGGTCTGAGAGGATGAACGGCCACATTGGAACTGAGACACGGTCCAA	0	0	0	0	0	0	0	0	0	0	0	0	0	0	0	0	0	0	0	0	0	101	256	0	47	0	0	0	0	0	0	0	0	0	0	0	0	0	0	0	0	0	0	0	0	0	79	0
236	GACGAACGCTGGCGGCGTGCTTAACACATGCAAGTCGAACGGGATTTAGTAGACAGAAGCTTCGGTGGAAGATTACTAATGAGAGTGGCGAACGGGTGAGTAACGCGTGAGCAACCTGCCTATGACAGTGGGATAGCCTCGGGAAACCGGGATTAATACCGCATAAAATCGTAGAAACACATGTTTCAACGGTCAAAGATTTATCGGTCATAGATGGGCTCGCGTCTGATTAGCTAGTTGGTGAGATAACAGCCCACCAAGGCGACGATCAGTAGCCGGTCTGAGAGGATGAACGGCCACATTGGAACTGAGACACGGTCCAA	0	0	0	0	47	0	0	0	0	0	0	0	0	346	0	0	0	0	0	0	0	0	0	0	0	0	345	939	0	0	0	0	0	0	0	0	0	0	0	0	0	0	0	0	0	0	0	0
237	GACGAACGCTGGCGGCGTGCTTAACACATGCAAGTCGAACGGAAAGGCCCTGCTTGCAGGGTACTCGAGTGGCGAACGGGTGAGTAACACGTGGGTGATCTGCCCTGCACTTCGGGATAAGCTTGGGAAACTGGGTCTAATACCGGATAGGAGCCATCTTTAGTGTGGTGGTTGGAAAGTTTTTTCGGTGTAGGATGAGCTCGCGGCCTATCAGCTTGTTGGTGGGGTAATGGCCTACCAAGGCGGCGACGGGTAGCCGGCCTGAGAGGGTGTACGGCCACATTGGGACTGAGATACGGCCCAG	0	0	0	0	0	0	0	0	0	0	0	0	0	0	107	0	0	0	0	0	0	0	0	0	0	0	0	0	0	0	0	0	0	0	0	0	0	0	0	0	0	0	0	0	0	0	0	0
238	GACGAACGCTGGCGGCGTGCCTAATACATGCAAGTCGAGCGAGCTTGCCTATAGAAATTCTTCGGAATGGACATAGATACAAGCTAGCGGCGGATGGGTGAGTAACGCGTGGGTAACCTGCCCTTAAGTCTGGGATACCATTTGGAAACAGATGCTAATACCGGATAAAAGCTACTTTCGCATGAAAGAAGTTTAAAAGGCGGCGTAAGCTGTCGCTAAAGGATGGACCTGCGATGCATTAGCTAGTTGGTAAGGCAACGGCTTACCAAGGCGATGATGCATAGCCGAGTTGAGAGACTGATCGGCCACATTGGGATTGAGACACGGCCCAA	0	0	0	0	0	0	0	0	0	0	0	0	0	0	0	0	0	0	0	0	0	0	0	0	0	0	0	0	0	0	0	0	0	0	0	0	0	0	0	0	0	0	0	0	0	0	0	0
239	GACGAACGCTGGCGGCGTGCTTAACACATGCAAGTCGAACGGAAAGGCCTCTTGCTTGCAAGGGGTACTCGAGTGGCGAACGGGTGAGTAACACGTGGGTGATCTGCCTTGCACTTCGGGATAAGCCTGGGAAACTGGGTCTAATACCGGATAGGACCATGCTTTAGTGTGTGTGGTGGAAAGTTTTTCGGTGCAAGATGAGCCCGCGGCCTATCAGCTTGTTGGTGGGGTAATGGCCTACCAAGGCGACGACGGGTAGCCGGCCTGAGAGGGTGTACGGCCACATTGGGACTGAGACACGGCCCAG	0	0	0	0	0	0	0	0	0	0	0	0	0	0	0	0	0	0	0	0	0	0	0	0	0	0	0	0	0	0	0	0	0	0	0	0	0	0	0	0	0	0	0	0	0	0	0	0
240	ATTGAACGCTGGCGGCAGGCCTAACACATGCAAGTCGAACGGTAACAGGAAGCAGCTTGCTGCTTTGCTGACGAGTGGCGGACGGGTGAGTAATGTCTGGGAAACTGCCTGATGGAGGGGGATAACTACTGGAAACGGTAGCTAATACCGCATAATGTCGCAAGACCAAAGAGGGGGACCTTCGGGCCTCTTGCCATCGGATGTGCCCAGATGGGATTAGCTAGTAGGTGGGGTAAAGGCTCACCTAGGCGACGATCCCTAGCTGGTCTGAGAGGATGACCAGCCACACTGGAACTGAGACACGGTCCAG	0	0	0	0	0	0	0	0	0	0	0	0	0	0	0	0	0	0	0	0	0	0	0	0	0	0	0	0	0	0	0	0	0	0	0	0	0	0	0	0	0	0	0	0	0	0	0	0
241	GATGAACGCTGGCGGCGTGCCTAATACATGCAAGTCGAGCGAACAGACGAGGAGCTTGCTCCTCTGACGTTAGCGGCGGACGGGTGAGTAACACGTGGATAACCTACCTATAAGACTGGGATAACTTCGGGAAACCGGAGCTAATACCGGATAACATGTTGAACCGCATGGTTCAACAGTGAAAGACGGTCTTGCTGTCACTTATAGATGGATCCGCGCCGCATTAGCTAGTTGGTAAGGTAACGGCTTACCAAGGCAACGATGCGTAGCCGACCTGAGAGGGTGATCGGCCACACTGGAACTGAGACACGGTCCAG	0	0	0	0	46	0	0	0	0	0	0	0	0	0	0	526	0	0	0	0	0	0	0	0	0	0	0	0	0	0	0	0	0	0	0	0	0	0	0	0	0	0	0	0	0	0	0	0
242	ATTGAACGCTGGCGGCATGCCTAACACATGCAAGTCGAACGGCAGCACAGCAGTAGCAATACTGTGGGTGGCGAGTGGCGGACGGGTGAGGAATACATCGGGACCTGCCCAGACGTGGGGGATAACGTAGGGAAACTTACGCTAATACCGCATACGTCCTACGGGAGAAAGCGGGGGATCGCAAGACCTCGCGCGGTTGGATGGACCGATGTTCGATTAGCTTGTTGGTGGGGTAACGGCTCACCAAGGCGACGATCGATAGCTGGTCTGAGAGGATGATCAGCCACACTGGGACTGAGACACGGCCCAG	0	0	0	0	0	0	0	0	0	0	0	0	0	0	0	0	0	0	0	0	0	0	0	0	0	0	0	0	0	0	0	0	0	0	0	0	0	0	0	0	0	0	0	0	0	0	105	0
243	GACGAACGCTGGCGGCGTGCTTAACACATGCAAGTCGAACGGAAAGGCCCCAGCTTGCTGGGGTACTCGAGTGGCGAACGGGTGAGTAACACGTGGGTGATCTGCCTTGCACTCTGGGATAAGCTTGGGAAACTGGGTCTAATACCGGATATGAACTGCCTTTAGTGTGGTGGTTGGAAAGTTTTTTCGGTGCAAGATGAGCTCGCGGCCTATCAGCTTGTTGGTGGGGTAATGGCCTACCAAGGCGTCGACGGGTAGCCGGCCTGAGAGGGTGTACGGCCACATTGGGACTGAGATACGGCCCAG	0	0	0	0	0	0	0	0	0	0	0	0	0	0	0	0	0	0	0	0	0	550	104	0	0	0	0	0	0	0	0	0	0	0	0	0	0	0	0	0	0	0	0	0	0	0	0	0
244	GACGAACGCTGGCGGCGCGCTTAACACATGCAAGTCGAGCGATGAAACTTTAACAGAACCCTTCGGGGCGAAGATAAAGTGGATTAGCGGCGGACGGGTGAGTAACACGTGAGTAACCTGCCTTAGACATTGGGATAGCCTCGGGAAACCGGGATTAATACCAAATAAAATCATAATGACACATGTCATAACGATCAAAACTCCGGTGGTCTAAGATGGACTCGCGTCCCATTAGCTAGTTGGTAGAGTAAAAGCCTACCAAGGCGACGATGGGTAGCCGGCCTGAGAGGGTGAACGGCCACATTGGAACTGAGAAACGGTCCAA	0	0	0	0	0	0	0	0	0	0	0	0	0	0	0	0	0	0	0	0	0	13	27	0	0	0	260	0	5	0	940	0	0	0	195	0	561	108	0	0	0	0	0	0	0	0	68	0
245	GATGAACGCTGGCTGTGTGCCTAATACATGCATGTCGAGCGAGGTTAGCAATAACCTAGCGGCGAATGGGTGAGTAACACGTGCTTAATCTACCTTTTAGATTGGAATACCCATTGGAAACAATGGCTAATGCCGGATACGCATGGAACCGCATGGTTCCGTTGTGAAAGGCGCTGTAAGGCGCCACTAAAATATGAGGGTGCGGAACATTAGTTAGTTGGTGAGGTAATGGCCCACCAAGACTATGATGTTTAGCCGGGTCGAGAGACTGAACGGCCACATTGGGACTGAGATACGGCCCAA	0	0	0	0	0	0	0	0	0	0	0	0	0	0	0	0	0	0	0	0	0	0	0	0	0	0	0	0	0	0	0	0	0	0	0	0	0	0	0	0	0	0	0	0	0	0	0	0
246	GACGAACGCTGGCGGCGTGCCTAATACATGCAAGTCGAGCGAGTCTGCCTTGAAGATCGGAGTGCTTGCACTCTGTGAAACAAGATACAGGCTAGCGGCGGACGGGTGAGTAACACGTGGGTAACCTGCCCAAGAGATCGGGATAACACCTGGAAACAGATGCTAATACCGGATAATAACAGATGATGCCTATCAACTGTTTAAAAGATGGTTCTGCTATCACTCTTGGATGGACCTGCGGTGCATTAGCTAGTTGGTAGGGTAACGGCCTACCAAGGCGATGATGCATAGCCGAGTTGAGAGACTGATCGGCCACATTGGGACTGAGACACGGCCCAA	0	0	0	0	0	0	0	0	0	0	0	0	0	0	0	0	0	0	0	0	0	0	0	0	0	0	0	0	0	0	0	0	0	0	0	0	0	0	0	0	0	0	0	0	0	0	0	0
247	GATGAACGCTGGCGGCGTGCCTAATACATGCAAGTCGAGCGAACAGACGAGGAGCTTGCTTCTCTGACGTTAGCGGCGGACGGGTGAGTAACACGTGGATAACCTACCTATAAGACTGGGATAACTTCGGGAAACCGGAGCTAATACCGGATAATATATTGAACCGCATGGTTCAATAGTGAAAGACGGTTTTGCTGTCACTTATAGATGGATCCGCGCCGCATTAGCTAGTTGGTAAGGTAACGGCTTACCAAGGCAACGATGCGTAGCCGACCTGAGAGGGTGATCGGCCACACTGGAACTGAGACACGGTCCAG	0	0	0	0	0	0	0	0	0	0	137	0	0	0	0	0	0	0	0	0	0	0	0	0	0	0	0	0	0	0	0	0	0	0	0	0	56	401	0	0	0	0	0	0	0	0	0	0
248	GACGAACGCTGGCGGCGTGCTTAACACATGCAAGTCGAACGGAAAGGCCCTGCTTGCAGGGTGCTCGAGTGGCGAACGGGTGAGTAACACGTGGGTGATCTGCCCTGCACTTCGGGATAAGCCTGGGAAACTGGGTCTAATACCGGATAGGAGCCATTTTTAGTGTGATGGTTGGAAAGTTTTTTCGGTGTAGGATGAGCTCGCGGCCTATCAGCTTGTTGGTGGGGTAATGGCCTACCAAGGCGGCGACGGGTAGCCGGCCTGAGAGGGTGGACGGCCACATTGGGACTGAGATACGGCCCAG	0	0	0	0	0	0	0	0	0	0	0	0	0	0	0	0	0	0	0	0	0	0	0	0	0	0	0	0	0	0	0	0	0	0	0	0	0	0	0	0	0	0	0	0	0	0	0	0
249	GACGAACGCTGGCGGCGTGCTTAACACATGCAAGTCGAACGAAGAGCGATGGAAGCTTGCTTCTATCAATCTTAGTGGCGAACGGGTGAGTAACGCGTAATCAACCTGCCCTTCAGAGGGGGACAACAGTTGGAAACGACTGCTAATACCGCATACGATCTGACCTCGGCATCGAGGATAGATGAAAGGTGGCCTCTACATGTAAGCTATCACTGAAGGAGGGGATTGCGTCTGATTAGCTAGTTGGAGGGGTAACGGCCCACCAAGGCGATGATCAGTAGCCGGTCTGAGAGGATGAACGGCCACATTGGGACTGAGACACGGCCCAG	0	0	0	0	0	0	0	0	0	0	0	0	0	0	0	0	0	0	0	0	0	0	0	0	0	0	0	0	0	0	0	0	0	0	0	0	0	0	0	0	0	0	0	0	0	0	0	0
250	GACGAACGCTGGCGGCGTGCCTAATACATGCAAGTCGTACGCTTCTTTTTCCACCGGAGCTTGCTCCACCGGAAAAAGAAGAGTGGCGAACGGGTGAGTAACACGTGGGTAACCTGCCCATCAGAAGGGGATAACACTTGGAAACAGGTGCTAATACCGTATAACAATCGAAACCGCATGGTTTTGATTTGAAAGGCGCTTTCGGGTGTCGCTGATGGATGGACCCGCGGTGCATTAGCTAGTTGGTGAGGTAACGGCTCACCAAGGCCACGATGCATAGCCGACCTGAGAGGGTGATCGGCCACATTGGGACTGAGACACGGCCCAA	0	0	0	0	0	0	0	0	0	0	0	0	0	0	0	0	0	0	0	0	0	0	0	0	0	0	0	0	0	0	0	0	0	0	0	0	0	0	0	0	0	0	0	0	0	0	0	0
251	ATTGAACGCTGGCGGCAGGCCTAACACATGCAAGTCGAACGGTAACAGGAAGCAGCTTGCTGCTTCGCTGACGAGTGGCGGACGGGTGAGTAATGTCTGGGAAACTGCCTGATGGAGGGGGATAACTACTGGAAACGGTAGCTAATACCGCATAACGTCGCAAGACCAAAGAGGGGGACCTTCGGACCTCTTGCCATCGGATGTGCCCAGATGGGATTAGCTAGTAGGTGGGGTAACGGCTCACCTAGGCGACGATCCCTAGCTGGTCTGAGAGGATGACCAGCCACACTGGAACTGAGACACGGTCCAG	0	0	0	0	0	0	0	0	0	0	0	0	0	0	0	0	0	0	0	0	0	0	0	0	0	0	0	0	0	0	0	0	0	0	0	0	0	0	0	0	0	0	0	0	0	0	0	0
252	GACGAACGCTGGCGGCGTGCCTAATACATGCAAGTCGAGCGAGCGGAACTAACAGATTTACCTCGGTAATGACGTTAGGAAAGCGAGCGGCGGATGGGTGAGCAACACGTGGGGAACCTGCCCCATAGTCTGGGATACCACTTGGAAACAGGTGCTAATACCGGATAAGAAAGCAGATCGCATGATCAGCTTTTAAAAGGCGGCGTAAGCTGTCGCTATGGGATGGCCCCGCGGTGCATTAGCTAGTTGGTAAGGTAAAGGCTTACCAAGGCGATGATGCATAGCCGAGTTGAGAGACTGATCGGCCACATTGGGACTGAGACACGGCCCAA	0	0	0	0	0	0	0	0	310	0	1076	0	2229	0	0	0	0	0	0	0	0	0	0	0	0	0	0	0	0	0	0	0	0	0	0	0	0	0	0	0	0	0	0	0	0	0	0	0
253	GATGAACGCTAGCTACAGGCTTAACACATGCAAGTCGAGGGGCAGCATGGTCTTAGCTTGCTAAGGCCGATGGCGACCGGCGCACGGGTGAGTAACGCGTATCCAACCTGCCTTACACTCTTGGACAGCCTTCTGAAAGGGAGATTAATACAAGATGTTATCATGAGTAAGCATTTTCGCATGATTAAAGGTTTACCGGTGTAAGATGGGGATGCGTTCCATTAGATAGTAGGCGGGGTAACGGCCCACCTAGTCTTCGATGGATAGGGGTTCTGAGAGGAAGGTCCCCCACATTGGAACTGAGACACGGTCCAA	0	0	0	0	0	0	0	0	0	0	0	0	0	0	0	0	0	0	0	0	0	0	0	0	0	64	0	0	0	0	0	0	0	0	200	54	0	0	0	0	0	0	0	0	0	0	190	0
254	GACGAACGCTGGCGGCGTGCTTAACACATGCAAGTCGAACGGAAAGGCCTCAGCTTGCTGGGGTACTCGAGTGGCGAACGGGTGAGTAACACGTGGGTGATCTGCCTTGCACTTCGGGATAAGCTTGGGAAACTGGGTCTAATACCGGATAGGACAGCTGTTTAGTGTCAGTTGTGGAAAGTTTTTTCGGTGCAAGATGAGCTCGCGGCCTATCAGCTTGTTGGTGGGGTAATGGCCTACCAAGGCGTCGACGGGTAGCCGGCCTGAGAGGGTGGACGGCCACATTGGGACTGAGATACGGCCCAG	0	0	0	0	0	0	0	0	0	0	0	0	0	0	0	0	0	0	0	0	0	0	0	0	0	0	0	0	0	0	0	0	0	0	0	0	0	0	0	0	0	0	0	0	0	0	0	0
255	ATTGAACGCTGGCGGCATGCTTTACACATGCAAGTCGGACGGCAGCACAGAGAAGCTTGCTTCTTGGGTGGCGAGTGGCGAACGGGTGAGTAATATATCGGAACGTACCGAGTAATGGGGGATAACTAATCGAAAGATTAGCTAATACCGCATATTCTCTGAGGAGGAAAGCAGGGGACCTTCGGGCCTTGCGTTATTCGAGCGGCCGATATCTGATTAGCTAGTTGGTGGGGTAAAGGCCTACCAAGGCGACGATCAGTAGCGGGTCTGAGAGGATGATCCGCCACACTGGGACTGAGACACGGCCCAG	0	0	0	0	0	0	0	0	0	0	0	0	0	0	0	0	0	0	0	139	0	0	0	0	0	141	0	0	0	0	0	0	0	0	0	0	0	0	0	0	0	0	0	0	0	0	0	0
256	GATGAACGCTAGCTATAGGCTTAACACATGCAAGTCGAGGGGCAGCATATAGATTGCTTGCAATTTATGATGGCGACCGGCGCACGGGTGAGTAACGCGTATCCAACCTACCCATTACTAGGGAATAACCCAGCGAAAGTTGGCCTAATGCCCTATGTAGTCGTTTGATCGCCTGAGATTTCGACGAAAGATTTATCGGTATTGGATGGGGATGCGTCTGATTAGCTTGTTGGCGGGGTAAAGGCCCACCAAGGCAACGATCAGTAGGGGTTCTGAGAGGAAGGTCCCCCACATTGGAACTGAGACACGGTTCAA	0	0	0	0	0	0	0	0	0	0	0	0	0	0	0	0	0	0	0	0	0	0	0	0	0	0	0	0	0	0	0	0	0	0	0	0	0	0	0	0	0	0	0	0	0	0	0	0
257	GACGAACGCTGGCGGCGTGCCTAATACATGCAAGTAGAACGCTGAAGAGAGGAGCTTGCTCTTCTTGGATGAGTTGCGAACGGGTGAGTAACGCGTAGGTAACCTGCCTTGTAGCGGGGGATAACTATTGGAAACGATAGCTAATACCGCATAACAATAGGTGACACATGTCATTTATTTGAAAGGGGCAATTGCTCCACTACAAGATGGACCTGCGTTGTATTAGCTAGTAGGTGAGGTAACGGCTCACCTAGGCGACGATACATAGCCGACCTGAGAGGGTGATCGGCCACACTGGGACTGAGACACGGCCCAG	0	0	0	0	0	0	0	0	0	0	0	0	0	0	0	0	0	0	0	221	0	0	0	0	0	152	0	0	0	0	0	0	0	0	0	0	0	0	0	0	0	0	0	0	0	0	0	0
258	GATTAACGCTGGCGGCGTGCATAACACATGCAAGTCGAACGATGAAGATTAAAGGATTTCTTCGGAATGACATTAATTGGATTAGTGGCGGACGGGTGAGTAACGCGTGAGTAACCTGCCTTACACAAGGGGATAGCCGTTGGAAACGACGAATAATACCCTATAACATTAACCTATCGCATGATAGGTTAATCAAAGATTTATCGGTGTAAGATGGACTCGCGTCTGATTAGCTAGTTGGTGGGGTAACAGCCTACCAAGGCAACGATCAGTAGCCGGCTTGAGAGAGTGTACGGCCACATTGGGACTGAGACACGGCCCAG	0	0	0	0	0	0	0	0	0	0	0	0	0	0	0	0	0	0	0	0	0	0	0	0	0	0	0	0	0	0	0	0	0	0	0	0	0	0	0	0	0	0	0	0	0	0	0	0
259	GATGAACGCTGGCGGCGTGCTTAACACATGCAAGTCGAACGGGATCCATCAGGCTTTGCTTGGTGGTGAGAGTGGCGAACGGGTGAGTAATGCGTGACCGACCTGCCCCATGCACCGGAATAGCTCCTGGAAACGGGTGGTAATGCCGGATGCTCCATCACACCGCATGGTGTGTTGGGAAAGCCTTTGCGGCATGGGATGGGGTCGCGTCCTATCAGCTTGATGGCGGGGTAACGGCCCACCATGGCTTCGACGGGTAGCCGGCCTGAGAGGGCGACCGGCCACATTGGGACTGAGATACGGCCCAG	0	0	0	0	0	0	0	0	0	0	0	0	0	0	0	0	0	0	0	0	0	0	0	0	0	0	0	0	0	0	0	0	0	0	0	0	0	0	0	0	0	0	0	0	0	0	0	0
260	GATAAACGCTGACAGAATGCTTAACACATGCAAGTCTATGAGGAAGTTTAGCTTGCTAAATGGACTCATGGCGGACGGGTGAGTAACGCGTAAAGAACTTGCCCTTTAGACTGGGATAACAGAGGGAAACTTCTGATAATACTGGATAAGTTAGTATATCGCATGATATACAAATGAAAGCTACGGCACTAAAGGAGAGCTTTGCGTCCTATTAGCTAGTTGGTAAGGTAAGAGCTTACCAAGGCGATGATAGGTAGCCGGCCTGAGAGGGTGGACGGCCACAAGGGGACTGAGATACGGCCCTT	0	0	0	0	0	0	0	0	0	0	0	0	0	0	0	0	0	0	0	0	0	0	0	0	0	0	0	0	0	0	0	0	0	0	0	0	0	0	0	0	0	0	0	0	0	0	0	0
261	GACGAACGCTGGCGGCGTGCCTAATACATGCAAGTAGAACGCTGAAGGAGGAGCTTGCTCTTCTGGATGAGTTGCGAACGGGTGAGTAACGCGTAGGTAACCTGCCTGGTAGCGGGGGATAACTATTGGAAACGATAGCTAATACCGCATAACAGTAGATGTTGCATGACATTTGCTTAAAAGGTGCAATTGCATCACTACCAGATGGACCTGCGTTGTATTAGCTAGTTGGTGGGGTAACGGCTCACCAAGGCGACGATACATAGCCGACCTGAGAGGGTGATCGGCCACACTGGGACTGAGACACGGCCCAG	0	0	0	0	0	0	0	0	0	0	0	0	0	0	0	0	0	0	0	0	0	0	0	0	0	0	0	0	0	0	0	0	0	0	0	0	0	0	0	0	0	0	0	0	0	0	0	0
262	GACGAACGCTGGCGGCGTGCTTAACACATGCAAGTCGAACGGAAAGGCCTCTTGCTTGCAAGGGGTACTCGAGTGGCGAACGGGTGAGTAACACGTGGGTGATCTGCCTTGCACTCTGGGATAAGCTTGGGAAACTGGGTCTAATACCGGATATGAACTGCCTTTAGTGTGGTGGTTGGAAAGTTTTTTCGGTGCAAGATGAGCTCGCGGCCTATCAGCTTGTTGGTGGGGTAATGGCCTACCAAGGCGTCGACGGGTAGCCGGCCTGAGAGGGTGTACGGCCACATTGGGACTGAGATACGGCCCAG	0	0	0	0	0	0	0	0	0	0	0	0	0	0	0	0	0	0	0	0	0	1242	292	0	14	0	0	0	0	0	244	0	0	0	0	0	0	0	0	0	0	0	0	0	0	0	42	0
263	GATGAACGCTGGCGGCGTGCTTAACACATGCAAGTCGAACGGAAAGGCTCCTGCTTGCAGGGGTACTCGAGTGGCGAACGGGTGAGTAACACGTGGGTGATCTGCCCTGCACTTCGGGATAAGCCTGGGAAACTGGGTCTAATACCGGATAGGACGATGGTTTGGATGCCATTGTGGAAAGTTTTTCGGTGTGGGATGAGCTCGCGGCCTATCAGCTTGTTGGTGGGGTAATGGCCTACCAAGGCGTCGACGGGTAGCCGGCCTGAGAGGGTGTACGGCCACATTGGGACTGAGATACGGCCCAG	0	0	0	0	0	0	0	0	0	0	0	0	0	0	0	128	0	0	0	0	0	0	0	0	0	0	0	0	0	0	0	0	0	0	0	0	0	0	0	0	0	0	0	0	0	0	119	0
264	AGTGAACGCTGGCGGCGTGCCTAATACATGCAAGTCGAACGATGAAGTCCTAGCTTGCTAGGATGGATTAGTGGCGCACGGGTGAGTAATATATAGTTAATCTGCCCTACACAGAGGAACAACAGTTGGAAACGGCTGCTAATACCTCATACTCCTATTTGACATAAGTTAAATAGGGAAAGTCTTTTCGGTGTAGGATGAGACTATATCGTATCAGCTAGTTGGTAAGGTAATGGCTTACCAAGGCTATGACGCGTAACTGGTCTGAGAGGATGATCAGTCACATTGGAACTGAGACACGGTCCAA	0	0	0	0	0	0	0	0	0	0	0	0	0	0	0	0	0	0	0	0	0	0	0	0	0	0	0	0	0	0	0	0	0	0	0	0	0	0	0	0	0	0	0	0	0	0	84	0
265	GACGAACGCTGGCGGCGTGCCTAATACATGCAAGTAGGACGCACAGTTTATACCGTAGCTTGCTACACCATAGACTGTGAGTTGCGAATGGGTGAGTAACGCGTAGGTAACCTACCTATTAGAGGGGGATAACTATTGGAAACGATAGCTAATACCGCATAACAGTATGTAACACATGTTAGATGCTTGAAAGATGCAATTGCATCGCTAGTAGATGGACCTGCGTTGTATTAGCTAGTAGGTAGGGTAATGGCCTACCTAGGCAACGATACATAGCCGACCTGAGAGGGTGATCGGCCACACTGGGACTGAGACACGGCCCAG	0	0	0	0	0	0	0	0	0	0	0	0	0	0	0	0	0	0	0	0	0	0	0	0	0	0	0	0	0	0	0	0	0	0	0	0	0	0	0	0	0	0	0	0	0	0	0	0
266	GACGAACGCTGGCGGCGCGCTTAACACATGCAAGTCGAGCGATGAAATCTTGACAGAACCCTTCGGGGTGAAGATAAGATGGATTAGCGGCGGACGGGTGAGTAACACGTGAGTAACCTGCCTTAGACATTGGGATAGCCTCGGGAAACCGGGATTAATACCAAATGAAATCACATATGCACATGCATAAATGATCAAAGCTCCGGCGGTCTAAGATGGACTCGCGTCCCATTAGCTAGTTGGTGAGGTAACGGCCCACCAAGGCGACGATGGGTAGCCGGCCTGAGAGGGTGAACGGCCACATTGGAACTGAGAAACGGTCCAA	0	0	0	0	0	0	0	0	0	0	0	0	0	0	0	0	0	0	571	0	0	0	0	0	10	0	0	0	0	0	0	0	0	0	0	0	0	0	0	0	0	0	10	0	0	0	103	0
267	GACGAACGCTGGCGGCGTGCCTAATACATGCAAGTCAAGCGAGCTTGCCTATAGAAATTCTTCGGAATGGACATAGATACAAGCTAGCGGCGGATGGGTGAGTAACGCGTGGGTAACCTGCCCTTAAGTCTGGGATACCATTTGGAAACAGATGCTAATACCGGATAAAAGCTACTTTCGCATGAAAGAAGTTTAAAAGGCGGCGTAAGCTGTCGCTAAAGGATGGACCTGCGATGCATTAGCTAGTTGGTAAGGTAACGGCTTACCAAGGCGATGATGCATAGCCGAGTTGAGAGACTGATCGGCCACATTGGGACTGAGACACGGCCCAA	0	0	0	0	0	0	0	0	0	0	0	0	0	0	0	0	0	0	0	0	0	0	0	0	0	0	0	0	0	0	0	0	0	0	0	0	0	0	0	0	0	0	0	0	0	0	0	0
268	ATTGAACGCTGGCGGCATGCCTTACACATGCAAGTCGAACGGTAACAGGTTAAGCTGACGAGTGGCGAACGGGTGAGTAATGTATCGGAACGTGCCCAGTCGTGGGGGATAACTGCTCGAAAGAGCAGCTAATACCGCATACGACCTGAGGGTGAAAGCGGGGGATCGCAAGACCTCGCGCGATTGGAGCGGCCGATATCAGATTAGGTAGTTGGTGAGGTAAAGGCTCACCAAGCCGACGATCTGTAGCTGGTCTGAGAGGACGACCAGCCACACTGGGACTGAGACACGGCCCAG	0	0	0	0	0	0	0	4	40	0	0	508	0	0	0	0	133	0	0	0	0	0	0	0	0	0	0	108	0	0	0	0	0	0	233	0	0	0	0	0	0	0	0	0	0	0	0	0
269	GATGAACGCTGGCGGCGTGCCTAATACATGCAAGTCGAGCGAACAGATAAGGAGCTTGCTCCTTTGACGTTAGCGGCGGACGGGTGAGTAACACGTGGATAACCTACCTATAAGACTGGGATAACTTCGGGAAACCGGAGCTAATACCGGATAACATATTGAACCGCATGGTTCAATAGTGAAAGGCGGCTTTGCTGTCACTTATAGATGGATCCGCGCCGTATTAGCTAGTTGGTAAGGTAACGGCTTACCAAGGCAACGATACGTAGCCGACCTGAGAGGGTGATCGGCCACACTGGAACTGAGACACGGTCCAG	0	0	0	0	0	0	0	0	0	0	0	0	0	0	10	0	105	0	0	21	0	0	0	0	0	33	0	0	0	0	0	0	0	0	0	0	0	0	0	0	0	0	0	0	0	0	0	0
270	GATGAACGCTGGCGGCGTGCCTAATACATGCAAGTCGAGCGAACAGACGAGGAGCTTGCTCCTTTGACGTTAGCGGCGGACGGGTGAGTAACACGTGGGTAACCTACCTATAAGACTGGGATAACTTCGGGAAACCGGAGCTAATACCGGATAATATTTCGAACCGCATGGTTCGATAGTGAAAGATGGCTTTGCTATCACTTATAGATGGACCTGCGCCGTATTAGCTAGTTGGTAAGGTAACGGCTTACCAAGGCGACGATACGTAGCCGACCTGAGAGGGTGATCGGCCACACTGGAACTGAGACACGGTCCAG	0	0	0	0	0	0	0	0	0	0	0	0	0	0	0	0	1922	0	0	31	0	0	0	0	0	0	0	0	0	0	0	0	0	0	0	0	0	0	0	0	0	0	0	0	0	0	0	0
271	GATAAACGCTGGCGGCGTGCATAACACATGCAAGTCGAACGATGAAACTTAGATGATTTCTTCGGAATGAACTTAAGTGGATTAGTGGCGAACGGGTGAGTAACACGTGAGTAACCTGCCTTACACAAGGGGATAGCCTTTGGAAACGAAGAATAATACCCTATAAAGTCAATTTATCGCATGATAGAATGACCAAAGATTTATCGGTGTAAGATGGACTTGCGTCTGATTAGCTAGTTGGTGAGATAAAGGCCCACCAAGGCAACGATCAGTAGCCGGCTTGAGAGAGTGTACGGCCACATTGGGACTGAGACACGGCCCAA	0	0	0	0	0	0	0	0	0	0	0	0	0	0	0	0	0	0	0	0	0	0	0	0	0	0	0	0	0	0	0	0	0	0	0	0	0	97	0	0	0	0	0	0	0	0	0	0
272	GATGAACGCTGGCGGCGTGCTTAACACATGCAAGTCGAACGGAGTTAATTTGAGGAAGCAAGCTTGCTTGAAGAATTAAATTAACTTAGTGGCGGACGGGCGAGTAACACGTGAGCAACCTGCCTCTTACAGGGGAATAACAACGGGAAACCGTTGCTAATACCGCATAACATGTTGAAAGGGCATCCTTTTAACATCAAAGGAGCAATCCGGTAAGAGATGGGCTCGCGTCCGATTAGCTAGTTGGTAGGGTAACGGCCTACCAAGGCGACGATCGGTAGCCGGACTGAGAGGTCGAACGGCCGCATTGGGACTGAGACACGGCCCAG	0	0	0	0	0	0	0	0	0	0	0	0	0	0	0	0	0	0	0	0	0	0	0	0	0	0	0	0	0	0	0	0	0	0	0	0	0	0	0	0	0	0	0	0	0	0	0	0
273	ATTGAACGCTGGCGGCAGGCCTAACACATGCAAGTCGAACGGTAACAGGAAGCAGCTTGCTGCTTCGCTGACGAGTGGCGGACGGGTGAGTAATGTCTGGGAAACTGCCTGATGGAGGGGGATAACTACTGGAAACGGTAGCTAATACCGCATAATGTCGCAAGACCAAAGAGGGGGACCTTCGGGCCTCTTGCCATCGGATGTGCCCAGATGGGATTAGCTTGTTGGTGGGGTAACGGCTCACCAAGGCGACGATCCCTAGCTGGTCTGAGAGGATGACCAGCCACACTGGAACTGAGACACGGTCCAG	0	0	0	0	0	0	0	0	0	0	0	0	0	0	0	0	0	0	0	0	0	0	0	0	0	0	0	0	0	0	0	0	0	0	0	0	0	0	0	0	0	0	0	0	0	0	0	0
274	GACGAACGCTGGCGGCGTGCCTAATACATGCAAGTCGAGCGAGTCTGCCTTGAAGATCGGAGTGCTTGCACTCTGTGAAACAAGATACAGGCTAGCGGCGGACGGGTGAGTAACACGTGGGTAACCTGCCCAAGAGATCGGGATAACACCTGGAAACAGATGCTAATACCGGATAACAACAGATGATGCCTATCAACTGTTTAAAAGATGGTTCTGCTATCACTCTTGGATGGACCTGCGGTGCATTAGCTAGTTGGTAGGGTAATGGCCTACCAAGGCGATGATGCATAGCCGAGTTGAGAGACTGATCGGCCACATTGGGACTGAGACACGGCCCAA	0	0	0	0	0	0	0	0	0	0	0	0	0	0	0	0	0	0	0	0	0	0	0	0	0	0	0	0	0	0	0	0	0	0	0	0	0	0	0	0	0	0	0	0	0	0	0	0
275	ATTGAACGCTGGCGGCATGCCTAACACATGCAAGTCGAACGGCAGCACAGTCGTAGCAATACGATGGGTGGCGAGTGGCGGACGGGTGAGGAATACATCGGGACCTGCCCAGACGTGGGGGATAACGTAGGGAAACTTACGCTAATACCGCATACGTCCTACGGGAGAAAGCGGGGGATCGCAAGACCTCGCGCGGTTGGATGGACCGATGTTCGATTAGCTAGTTGGTGAGGTAATGGCTCACCAAGGCGACGATCGATAGCTGGTCTGAGAGGATGATCAGCCACACTGGGACTGAGACACGGCCCAG	0	0	0	0	0	0	0	0	0	0	0	0	0	0	0	0	0	0	0	0	0	0	0	0	0	0	0	0	0	0	0	0	0	0	0	9	0	0	0	0	0	0	0	0	0	0	46	0
276	GACGAACGCTGGCGGCGTGCTTAACACATGCAAGTCGAACGGGAAGAGATGAAGAGCTTGCTCTTTATCGAATCCAGTGGCAAACGGGTGAGTAACACGTAAACAACCTGCCTTCAGGATGGGGACAACAGACGGAAACGACTGCTAATACCGAATACGTTCCACGGGCCGCATGACCTGTGGAAGAAAGGGTAGCCTCTACCTGTAAGCTATCGCCTGAAGAGGGGTTTGCGTCTGATTAGGCAGTTGGTGGGGTAACGGCCCACCAAACCAACGATCAGTAGCCGGTCTGAGAGGATGAACGGCCACACTGGAACTGAGACACGGTCCAG	0	0	0	0	0	0	0	0	0	0	0	0	0	0	0	0	0	0	131	0	2	0	0	5	26	0	109	0	601	207	0	0	0	0	0	0	29	0	0	0	0	0	137	0	0	0	25	0
277	ATTGAACGCTGGCGGCAGGCTTAACACATGCAAGTCGAACGGTAGCAGGAGAAAGCTTGCTTTCTTGCTGACGAGTGGCGGACGGGTGAGTAATGCTTGGGAATCTGGCTTATGGAGGGGGATAACTACGGGAAACTGTAGCTAATACCGCGTAGAATCGGAAGATGAAAGTGCGGGACCGCAAGGCCGCATGCCATGAGATGAGCCCAAGTGGGATTAGGTAGTTGGTGGGGTAAAGGCCTACCAAGCCTGCGATCTCTAGCTGGTCTGAGAGGATGGCCAGCCACACTGGAACTGAGACACGGTCCAG	0	0	0	0	0	0	0	0	0	0	0	0	0	0	0	0	0	0	0	0	0	0	0	0	0	0	0	0	0	0	0	0	0	0	0	0	0	0	0	0	0	0	0	0	0	0	0	0
278	GATGAACGCTAGCTACAGGCTTAACACATGCAAGTCGAGGGGAAACGACATCGAAAGCTTGCTTTTGATGGGCGTCGACCGGCGCACGGGTGAGTAACGCGTATCCAACCTGCCCACCACTTGGGGATAACCTTGCGAAAGTAAGACTAATACCCAATGATATCTCTAGAAGACATCTGAAAGAGATTAAAGATTTATCGGTGATGGATGGGGATGCGTCTGATTAGCTTGTTGGCGGGGTAACGGCCCACCAAGGCAACGATCAGTAGGGGTTCTGAGAGGAAGGTCCCCCACATTGGAACTGAGACACGGTCCAA	0	0	0	0	0	0	0	0	0	0	0	0	0	335	0	0	0	0	0	106	0	0	0	0	0	56	0	0	0	0	0	0	0	0	0	0	0	0	0	0	0	0	0	0	0	0	0	0
279	AGTGAACGCTGGCGGCGTGCCTAATACATGCAAGTCGAACGATGAAGCTTCTAGCTTGCTAGAATGCTGATTAGTGGCGCACGGGTGAGTAACGCATAGGTCATGTGCCTCTTAGTTTGGGATAGCCATTGGAAACGATGATTAATACCAGATACTCCCTACGGGGGAAAGATTCATCGCTAAGAGATCAGCCTATGTCCTATCAGCTTGTTGGTAAGGTAATGGCTTACCAAGGCTATGACGGGTATCCGGCCTGAGAGGGTGAACGGACACACTGGAACTGAGACACGGTCCAG	0	0	0	0	0	0	0	0	0	0	0	0	0	0	0	0	0	0	0	949	0	0	0	0	0	516	0	0	0	0	0	0	0	0	0	0	0	0	0	0	0	0	0	0	0	0	0	0
280	GATAAACGCTGGCGGCGTGCATAACACATGCAAGTCGAACGATGAAACTTAGATGATTTCTTCGGAATGAACTTAAGCGGATTAGTGGCGAACGGGTGAGTAACACGTGAGTAACCTGCCTTACACAAGGGGATAGCCTTTGGAAACGAAGAATAATACCCTATAACGTCAATTTATCGCATGATAGAATGACCAAAGATTTATCGGTGTAAGATGGACTTGCGTCTGATTAGCTAGTTGGTGAGATAAAGGCCCACCAAGGCAACGATCAGTAGCCGGCTTGAGAGAGTGTACGGCCACATTGGGACTGAGACACGGCCCAA	0	0	0	0	0	0	0	0	0	0	0	0	0	0	0	0	0	0	355	0	0	0	0	0	0	0	0	0	0	0	0	0	0	0	0	0	0	0	0	0	0	0	0	0	0	0	0	0
281	AGTGAACGCTGGCGGCAGGCCTAACACATGCAAGTCGAGCGGCAGCACGGGGGCAACCCTGGTGGCGAGCGGCGGACGGGTGAGGAATACATCGGAATCTGCCTTGTTGTGGGGGATAACGTAGGGAAACTTACGCTAATACCGCATAAGACCGAAAGGTGAAAGTGGGGGACCGCAAGGCCTCACGCGACAAGATGAGCCGATGTCGGATTAGCTAGTTGGTGAGGTAATGGCTCACCAAGGCGACGATCCGTAGCTGGTCTGAGAGGATGATCAGCCACACTGGAACTGAGACACGGTCCAG	0	0	0	0	0	0	0	486	0	0	0	0	0	0	0	793	561	0	0	0	0	0	0	0	0	0	0	0	0	0	109	0	0	0	0	0	0	0	0	0	0	0	0	0	0	0	0	0
282	GACGAACGCTGGCGGCGTGCTTAACACATGCAAGTCGAACGAAGAGCGATGGAAGCTTGCTTCTATCAATCTTAGTGGCGAACGGGTGAGTAACGCGTAATCAACCTGCCCTTCAGAGGGGGACAACAGTTGGAAACGACTGCTAATACCGCATACGATCTAAACTCGGCATCGAGGATAGATGAAAGGTGGCCTCTACATGTAAGCTATCACTGAAGGAGGGGATTGCGTCTGATTAGCTAGTTGGAGGGGTAACGGCCCACCAAGGCGATGATCAGTAGCCGGTCTGAGAGGATGAACGGCCACATTGGGACTGAGACACGGCCCAG	0	0	0	0	0	0	0	0	0	0	0	0	0	0	0	0	0	0	0	0	0	0	0	0	0	0	0	0	0	0	0	0	0	0	0	0	0	0	0	0	0	0	0	0	0	0	0	0
283	GATGAACGCTAGCTATAGGCTTAACACATGCAAGTCGAGGGGAAACGGCAAAGAGTGCTTGCACACTTTGGACGTCGACCGGCGCACGGGTGAGTAACGCGTATCCAACCTGCCCTTTACTTGGGGATAACCCGTTGAAAGACGGACTAATACCCAATGATATTCATTGATGACATCTGATTTGAATTAAAGATTTATCGGTATAGGATGGGGATGCGTCTGATTAGCTTGTTGGTGAGGTAACGGCTCACCAAGGCAACGATCAGTAGGGGTTCTGAGAGGAAGGTCCCCCACATTGGAACTGAGACACGGTCCAA	0	0	0	0	0	0	0	0	0	0	0	0	0	0	0	0	0	0	0	0	0	0	0	0	0	0	0	0	0	0	0	0	0	0	0	0	0	0	0	0	4	0	64	0	0	0	0	0
284	ATTGAACGCTGGCGGCATGCCTTACACATGCAAGTCGAACGGTAACAGGTTAAGCTGACGAGTGGCGAACGGGTGAGTAATATATCGGAACGTGCCCAGTCGTGGGGGATAACTGCTCGAAAGAGCAGCTAATACCGCATACGACCTGAGGGTGAAAGCGGGGGATCGCAAGACCTCGCGCGATTGGAGCGGCCGATATCAGATTAGGTAGTTGGTGGGGTAAAAGCCTACCAAGCCAACGATCTGTAGCTGGTCTGAGAGGACGACCAGCCACACTGGGACTGAGACACGGCCCAG	0	0	0	0	0	0	0	0	0	0	0	0	0	0	0	0	0	0	0	0	0	0	0	0	0	0	0	0	0	0	0	0	0	0	0	7	2	0	0	0	0	0	0	0	0	0	0	0
285	GATGAACGCTGGCGGCGTGCCTAATACATGCAAGTCGAGCGAACAGACGAGGAGCTTGCTCCTTTGACGTTAGCGGCGGACGGGTGAGTAACACGTAGGTAACCTACCTATAAGACTGGGATAACTTCGGGAAACCGGAGCTAATACCGGATAATATTTCGAACCGCATGGTTCGATAGTGAAAGGTGGCTTTGCTATCACTTATAGATGGACCTGCGCCGTATTAGCTAGTTGGTAAGGTAACGGCTTACCAAGGCAACGATACGTAGCCGACCTGAGAGGGTGATCGGCCACACTGGAACTGAGACACGGTCCAG	0	0	0	0	0	0	0	0	0	0	0	0	0	0	0	0	0	0	0	0	0	0	0	0	0	0	0	0	0	0	0	0	0	0	0	0	0	77	0	0	0	0	0	0	0	0	0	0
286	GATGAACGCTAGCTACAGGCTTAACACATGCAAGTCGCAGGGTAACGTGAGGGAAGCTTGCTTCCCTTGACGACGACTGGCGCACGGGTGAGTAACGCGTATCCAACCTTCCCATGACCACGGGATAACCCGTTGAAAGACGGACTAATACCGTATGACGTCGTTTGCTGACATCAAATAACGATTAAAGGTTTAGCGGTGATGGATGGGGATGCGTCTGATTAGCTTGTTGGCGGGGTAACGGCCCACCAAGGCGACGATCAGTAGGGGTTCTGAGAGGAAGGTCCCCCACATTGGAACTGAGACACGGTCCAA	0	0	0	0	0	0	48	0	0	0	0	0	0	0	0	0	0	0	0	0	0	0	0	0	0	0	0	0	0	0	0	0	0	0	0	0	79	0	0	0	0	0	0	0	0	0	0	0
287	GACGAACGCTGGCGGCGTGCTTAACACATGCAAGTCGAACGGAAAGGCTCCAGCTTGCTGGAGTGCTCGAGTGGCGAACGGGTGAGTAACACGTGGGCAATCTGCCCTGCACTCTGGGATAAGCCTGGGAAACTGGGTCTAATACCGGATAGGACCTTTCTCCTCATGGGGTTTGGTGGAAAGTTTTTCGGTGCAGGATGAGCCCGCGGCCTATCAGCTTGTTGGTGGGGTAATGGCCTACCAAGGCGACGACGGGTAGCCGGCCTGAGAGGGTGATCGGCCACATTGGGACTGAGATACGGCCCAG	0	0	0	0	0	0	0	0	0	0	0	0	0	0	0	0	0	0	126	0	0	29	60	10	14	0	0	0	0	0	0	0	0	0	0	0	19	31	0	0	0	0	47	0	0	0	168	0
288	GACGAACGCTGGCGGCGTGCTTAACACATGCAAGTCGAACGGGATTTAGTAGACAGAAACCTCGGTGGAAGATTACTAATGAGAGTGGCGAACGGGTGAGTAACGCGTGAGCAACCTGCCTATGACAGTGGGATAGCCTCGGGAAACCGGGATTAATACCGCATAAAATCGTAGAAACACATGTTTTAACGGTCAAAGATTTATCGGTCATAGATGGGCTCGCGTCTGATTAGCTAGTTGGTGAGATAACAGCCCACCAAGGCGACGATCAGTAGCCGGTCTGAGAGGATGAACGGCCACATTGGAACTGAGACACGGTCCAA	0	0	0	0	0	0	0	0	0	0	0	0	0	0	0	0	0	0	0	0	0	0	0	0	0	0	0	0	0	0	0	0	0	0	0	0	37	42	0	0	0	0	0	24	0	0	0	0
289	GACGAACGCTGGCGGCGTGCCTAATACATGCAAGTCGAACGCTTCTTTCCTCCCAAGTGCTTGCACTCAATTGGAAAGAGGAGTGGCGGACGGGTGAGTAACACGTGGGTAACCTACCCATCAGAGGGGGATAACACTTGGAAACAGGTGCTAATACCGCATAACAGTTTATGCCGCATGGCATAAGAGTGAAAGGCGCTTTCGGGTGTCGCTGATGGATGGACCCGCGGTGCATTAGCTAGTTGGTGAGGTAACGGCTCACCAAGGCCACGATGCATAGCCGACCTGAGAGGGTGATCGGCCACACTGGGACTGAGACACGGCCCAG	0	0	0	0	0	0	0	0	0	0	0	0	0	0	0	0	0	0	0	0	0	0	0	0	0	0	0	0	0	0	0	0	0	0	0	0	0	0	0	0	0	0	0	0	0	0	0	0
290	GACGAACGCTGGCGGCGTGCTTAACACATGCAAGTCGAACGGAAAGGCCCCTTTGGGGGTACTCGAGTGGCGAACGGGTGAGTAACACGTGAGTAACCTGCCCTTGACTTCGGGATAACTTCAGGAAACTGGGGCTAATACCGGATAGGAATCCTTGCTGCATGGTGGGGGTTGGAAAGCTTCGGCGGTTTTGGATGGACTCGCGGCTTATCAGCTTGTTGGTGGGGTAGTGGCTTACCAAGGCTTTGACGGGTAGCCGGCCTGAGAGGGCGACCGGCCACATTGGGACTGAGATACGGCCCAG	0	0	0	0	0	0	0	0	0	0	0	0	0	0	0	0	0	0	0	0	0	0	0	0	0	0	0	0	0	0	0	0	0	0	0	0	0	0	0	95	0	0	0	0	0	0	0	0
291	GACGAACGCTGGCGGCGTGCTTAACACATGCAAGTCGAACGAGAGGACATGGGAAGCTTGCTTCCTATGAAATCGAGTGGCAAACGGGTGAGTAACGCGTAAACAACCTGCCCTTCGGATGGGGATAACAGCCGGAAACGGCTGCTAATACCGAATACGATCTTTTCGTCGCATGACGAAAAGAAGAAAGGATGGCCTCTATACAAAGCTATCGCCGAAGGAGGGGTTTGCGTCTGATTAGCTGGTTGGAGGGGTAACGGCCCAACAAGGCGATGATCAGTAGCCGGTCTGAGAGGATGAACGGCCACATTGGGACTGAGACACGGCCCAG	0	0	0	0	0	0	0	0	0	0	0	0	0	0	0	0	0	0	0	0	0	0	0	0	0	0	0	0	0	0	0	0	0	0	0	0	0	0	0	0	0	0	0	0	0	0	0	0
292	ATTGAACGCTGGCGGCAGGCTTAACACATGCAAGTCGAACGGTAACATAGAGAAGCTTGCTTCTTTGATGACGAGTGGCGGACGGGTGAGTAATGCTTGGGAATCTGGCTTATGGAGGGGGATAACTACGGGAAACTGTAGCTAATACCGCGTAATATCGAAAGATTAAAGTGTGGGACCTTCGGGCCACATGCCATAGGATGAGCCCAAGTGGGATTAGGTAGTTGGTGAGGTAAAGGCTCACCAAGCCGACGATCTCTAGCTGGTCTGAGAGGATGACCAGCCACACTGGGACTGAGACACGGCCCAG	0	0	0	0	0	0	0	0	0	0	0	0	0	0	0	0	0	0	0	0	0	0	0	0	0	0	0	0	0	0	0	0	0	0	0	0	0	0	0	0	0	0	0	0	0	0	0	0
293	ATTGAACGCTGGCGGCAGGCCTAACACATGCAAGTCGAACGGTAACAGGAAGCAGCTTGCTGCTTTGCTGACGAGTGGCGGACGGGTGAGTAATGTCTGGGAAACTGCCTGGTGGAGGGGGATAACTACTGGAAACGGTAGCTAATACCGCATAACGTCGCAAGACCAAAGAGGGGGACCTTCGGGCCTCTTGCCATCGGATGTGCCCAGATGGGATTAGCTAGTAGGTGGGGTAACGGCTCACCTAGGCGACGATCCCTAGCTGGTCTGAGAGGATGACCAGCCACACTGGAACTGAGACACGGTCCAG	0	0	0	0	0	0	0	0	0	0	0	0	0	0	0	0	0	0	0	0	0	0	0	0	0	2149	0	0	0	0	0	0	0	0	0	0	0	0	0	0	0	0	0	0	0	0	0	0
294	GACGAACGCTGGCGGCGTGCTTAACACATGCAAGTCGAACGGGATTTAGTAGACAGAAGCCTCGGTGGAAGATTACTAATGAGAGTGGCGAACGGGTGAGTAACGCGTGAGCAACCTGCCTATGACAGTGGGATAGCCTCGGGAAACCGGGATTAATACCGCATAAAATCGTAGAAACACATGTTTTAACGGTCAAAGATTTATCGGTCATAGATGGGCTCGCGTCTGATTAGCTAGTTGGTGAGATAACAGCCCACCAAGGCGACGATCAGTAGCCGGTCTGAGAGGATGAACGGCCACATTGGAACTGAGACACGGTCCAA	0	0	0	54	0	0	159	0	0	0	0	0	0	0	0	0	0	0	0	0	0	0	0	0	0	0	0	0	0	0	0	0	0	0	0	0	94	51	0	0	0	0	0	0	0	0	0	0
295	GACGAACGCTGGCGGCGTGCTTAACACATGCAAGTCGAACGGGATTTAGTAAACAGAAGCCTCGGTGGAAGATTACTAATGAGAGTGGCGAACGGGTGAGTAACGCGTGAGCAACCTGCCTATGACAGTGGGATAGCCTCGGGAAACCGGGATTAATACCGCATAAAATCGTAGAAACACATGTTTTAACGGTCAAAGATTTATCGGTCATAGATGGGCTCGCGTCTGATTAGCTAGTTGGTGAGATAACAGCCCACCAAGGCGACGATCAGTAGCCGGTCTGAGAGGATGAACGGCCACATTGGAACTGAGACACGGTCCAA	0	0	0	134	0	0	139	0	0	0	0	0	0	0	0	0	0	0	0	0	0	31	0	0	0	0	54	0	0	0	0	0	0	0	0	0	0	0	0	0	0	0	0	18	0	0	0	0
296	GATGAACGCTGGCGGCGTGCTTAACACATGCAAGTCGAACGAAGCACTTTATTTGATTTCCTTCGGGACTGATTATTTTGTGACTGAGTGGCGGACGGGTGAGTAACGCGTGGGTAACCTGCCTTGTACAGGGGGATAACAGTTGGAAACGGCTGCTAATACCGCATAAGCGCACAGCATCGCATGATGCAGTGTGAAAAACTCCGGTGGTATAAGATGGACCCGCGTTGGATTAGCTAGTTGGTGAGGTAACGGCCCACCAAGGCGACGATCCATAGCCGACCTGAGAGGGTGACCGGCCACATTGGGACTGAGACACGGCCCAA	0	0	0	0	0	0	0	0	0	0	0	0	0	0	0	0	0	0	0	166	0	0	0	0	0	71	12	0	0	0	0	0	0	0	0	0	0	0	0	0	0	0	0	0	0	0	0	0
297	ATTGAACGCTGGCGGCAGGCCTAACACATGCAAGTCGAGCGGTAGCACAGAGAGCTTGCTCTCGGGTGACGAGCGGCGGACGGGTGAGTAATGTCTGGGAAACTGCCTGATGGAGGGGGATAACTACTGGAAACGGTAGCTAATACCGCATAACGTCGCAAGACCAAAGTGGGGGACCTTCGGGCCTCATGCCATCAGATGTGCCCAGATGGGATTAGCTAGTAGGTGGGGTAATGGCTCACCTAGGCGACGATCCCTAGCTGGTCTGAGAGGATGACCAGCCACACTGGAACTGAGACACGGTCCAG	0	0	0	0	0	0	0	132	0	0	0	0	0	0	0	0	0	0	0	0	0	0	0	0	0	0	0	0	0	0	0	0	0	0	0	0	0	0	0	0	0	0	0	0	0	0	0	0
298	GACGAACGCTGGCGGCGTGCTTAACACATGCAAGTCGAACGGAAAGGCCCTGCTTGCAGGGTACTCGAGTGGCGAACGGGTGAGTAACACGTGGGTGATCTGCCCTGCACTTCGGGATAAGCTTGGGAAACTGGGTCTAATACCGGATAGGAACCATCTTTAGTGTGGTGGTTGGAAAGTTTTTTCGGTGTAGGATGAGCTCGCGGCCTATCAGCTTGTTGGTGGGGTAATGGCCTACCAAGGCGGCGACGGGTAGCCGGCCTGAGAGGGTGTACGGCCACATTGGGACTGAGATACGGCCCAG	0	0	0	0	0	0	0	0	0	0	0	0	0	0	0	0	0	0	0	0	0	0	0	0	0	0	0	0	0	0	0	0	0	0	0	0	0	0	0	0	0	0	0	0	0	0	0	0
299	GATGAACGCTGGCGGCGTGCCTAATACATGCAAGTCGAGCGAACAGATAAGGAGCTTGCTCCTTTGACGTTAGCGGCGGACGGGTGAGTAACACGTGGGTAACCTACCTATAAGACTGGGACAACTTCGGGAAACCGGAGCTAATACCGGATAATATGTTGAACCGCATGGTTCAATAGTGAAAGATGGTTTTGCTATCACTTATAGATGGACCCGCGCCGTATTAGCTAGTTGGTGAGGTAATGGCTCACCAAGGCAACGATACGTAGCCGACCTGAGAGGGTGATCGGCCACACTGGAACTGAGACACGGTCCAG	0	0	0	0	0	0	0	0	0	0	6	0	0	0	0	0	0	0	0	0	0	0	0	0	0	0	0	0	2625	0	0	0	0	0	0	0	0	0	0	0	0	0	0	0	0	0	0	0
300	GACGAACGCTGGCGGCGTGCTTAACACATGCAAGTCGAACGAAGAGCGATGGAAGCTTGCTTCTATCAATCTTAGTGGCGAACGGGTGAGTAACGCGTAATCAATCTGCCCTTCAGAGGGGGACAACAGTTGGAAACGACTGCTAATACCGCATACGATCTAAACTCGGCATCGAGGATAGATGAAAGGTGGCCTCTACATGTAAGCTATCACTGAAGGAGGGGATTGCGTCTGATTAGCTAGTTGGAGGGGTAACGGCCCACCAAGGCGATGATCAGTAGCCGGTCTGAGAGGATGAACGGCCACATTGGGACTGAGACACGGCCCAG	0	0	0	0	0	0	0	0	0	0	0	0	0	0	0	0	0	0	0	0	0	0	0	0	0	0	0	0	0	0	0	0	0	0	0	0	0	0	0	0	0	0	0	0	0	0	0	0
301	GATGAACGCTAGCTACAGGCTTAACACATGCAAGTCGCAGGGTAACGTGAGGGAAGCTTGCTTCCCTTGACGACGACTGGCGCACGGGTGAGTAACGCGTATCCAACCTTCCCATGACCACGGGATAACCCGTTGAAAGACGGACTAATACCGTATGACATCGTTTGCTGACATCAAATAACGATTAAAGGTTTAGCGGTGATGGATGGGGATGCGTCTGATTAGCTTGTTGGCGGGGTAACGGCCCACCAAGGCGACGATCAGTAGGGGTTCTGAGAGGAAGGTCCCCCACATTGGAACTGAGACACGGTCCAA	0	0	0	0	0	0	0	0	0	0	0	0	0	0	0	0	0	0	0	0	0	0	0	0	0	0	0	0	0	0	0	0	0	0	0	0	0	0	0	1087	82	0	42	25	83	0	0	0
302	GACGAACGCTGACGGCGTGCTTAACACATGCAAGTCGAACGGGATCCATTAGCGCTTTTGTGTTTTTGGTGAGAGTGGCGAACGGGTGAGTAACACGTGAGTAACCTGCCCTTTTCTTTGGGATAAGCCTGGGAAACTGGGTCTAATACTGGATGTTCTGGCTTCCTCGCATGGGGTTGTTGGGAAAGGTTTTTTCTGGATTGGGATGGGCTCGCGGCTTATCAGCTTGTTGGTGGGGTGATGGCTTACCAAGGCTTTGACGGGTAGCCGGCCTGAGAGGGTGGTCGGTCACACTGGGACTGAGATACGGCCCAG	0	0	0	0	0	0	0	0	0	0	0	0	0	0	0	0	0	0	0	0	0	0	0	0	0	0	0	0	0	0	0	0	0	0	0	0	0	0	0	0	0	0	0	0	0	0	0	0
303	AGTGAACGCTGGCGGTAGGCCTAACACATGCAAGTCGAACGGCAGCACAGGAGAGCTTGCTCTCTGGGTGGCGAGTGGCGGACGGGTGAGGAACACATCGGAATCTACTCTGTCGTGGGGGATAACGTAGGGAAACTTACGCTAATACCGCATACGACCTACGGGTGAAAGTGGGGGACCTTCGGGCCTCACGCGATTGAATGAGCCGATGTCGGATTAGCTAGTTGGCGGGGTAAAGGCCCACCAAGGCGACGATCCGTAGCTGGTCTGAGAGGATGATCAGCCACACTGGAACTGAGACACGGTCCAG	0	0	0	0	0	0	0	0	0	1484	0	914	0	0	0	0	0	0	0	0	0	0	0	0	0	0	0	0	0	0	0	0	0	75	0	0	0	0	0	0	0	0	0	0	0	0	0	0
304	GATGAACGCTGGCGGCGTGCTTAACACATGCAAGTCGAACGGGATCCCAGGAGCTTGCTCCTGGGTGAGAGTGGCGAACGGGTGAGTAATGCGTGACCGACCTGCCCCATACACCGGAATAGCTCCTGGAAACGGGTGGTAATGCCGGATGCTCCAGTTGACCGCATGGTCCTCTGGGAAAGCTTTTGCGGTATGGGATGGGGTCGCGTCCTATCAGCTTGATGGCGGGGTAACGGCCCACCATGGCTTCGACGGGTAGCCGGCCTGAGAGGGCGACCGGCCACATTGGGACTGAGATACGGCCCAG	0	0	0	0	0	0	0	0	0	0	0	0	0	0	0	0	0	0	0	11	0	0	0	0	0	47	0	0	0	0	0	0	0	0	0	0	0	0	0	0	0	0	0	0	0	0	0	0
305	GATGAACGCTGGCGGCGTGCTTAACACATGCAAGTCGAACGGGATCCATCAAGCTTGCTTGGTGGTGAGAGTGGCGAACGGGTGAGTAATGCGTGACCGACCTGCCCCATACACCGGAATAGCTCCTGGAAACGGGTGGTAATGCCGGATGCTCCAGTTGATCGCATGGTCTTCTGGGAAAGCTTTCGCGGTATGGGATGGGGTCGCGTCCTATCAGCTTGACGGCGGGGTAACGGCCCACCGTGGCTTCGACGGGTAGCCGGCCTGAGAGGGCGACCGGCCACATTGGGACTGAGATACGGCCCAG	0	0	0	113	0	0	0	0	0	0	0	0	0	0	0	0	0	0	0	28	0	0	0	0	0	0	0	0	0	0	0	0	0	0	0	0	0	0	0	0	0	0	0	0	0	0	0	0
306	GATGAACGCTGGCGGCGTGCCTAATACATGCAAGTCGAGCGAACAGACGAGGAACTTGCTCCTCTGACGTTAGCGGCGGACGGGTGAGTAACACGTGGATAACCTACCTATAAGACTGGGATAACTTCGGGAAACCGGAGCTAATACCGGATAATATATTGAACCGCATGGTTCAATAGTGAAAGACGGTTTTGCTGTCACTTATAGATGGATCCGCGCCGCATTAGCTAGTTGGTAAGGTAACGGCTTACCAAGGCAACGATGCGTAGCCGACCTGAGAGGGTGATCGGCCACACTGGAACTGAGACACGGTCCAG	0	0	0	0	0	0	0	0	0	0	0	0	0	0	0	0	0	0	0	0	0	0	0	0	0	0	0	0	0	0	0	0	0	0	0	0	0	0	0	0	0	0	0	0	0	0	0	0
307	GACGAACGCTGGCGGCGCGCTTAACACATGCAAGTCGAGCGATGAAATCTTAACAGAACCCTTCGGGGCGAAGATAAGACGGATTAGCGGCGGACGGGTGAGTAACACGTGAGTAACCTGCCTTTTACACAGGGATAGCCTCGGGAAACCGGGATTAAAACCTGATGAAACTATCAAATCACATGATTAAGAAAGTTAAAACTCCGGTGGTAAAAGATGGACTCGCGTCCCATTAGCTAGTTGGTGAAGGTAACGGCCCACCAAGGCAACGATGGGTAGCCGGCCTGAGAGGGTGAACGGCCACATTGGAACTGAGAAACGGTCCAA	0	0	0	0	0	0	0	0	0	0	0	0	0	0	0	0	0	0	188	0	0	0	0	0	0	0	0	0	0	0	0	0	0	0	0	0	0	12	0	0	0	0	101	0	0	0	0	0
308	GATGAACGCTGGCTGTGTGCCTAATACATGCATGTCGAGCGAAGTAGCAATACTTAGCGGCGAATGGGTGAGTAACACGTGCTCAACGTGCCCTCAAGATTGGGATAGCAACTGGAAACAGTTGATAATACCAAATACTTATATTTTTCGCATGAAGAATATATAAAAGGAGCGTTTGCTCCGCTCGAGGATCGGGGTGCGTAACATTAGCTAGTTGGTGAGGTAACGGCCCACCAAGGCGATGATGTTTAGCGGGGTTGAGAGACTGAACCGCCACACTGGGACTGAGATACGGCCCAG	0	0	0	0	0	0	0	0	0	0	0	0	0	0	0	0	0	0	0	0	0	0	0	0	0	0	0	0	0	0	0	0	0	0	0	0	0	0	0	0	0	0	0	0	0	0	0	0
309	GATGAACGCTGGCGGCGTGCTTAACACATGCAAGTCGAACGGGATCTGACCAGCTTGCTGGTTGGTGAGAGTGGCGAACGGGTGAGTAATGCGTGACCAACCTACCCTATGCTCCAGAATAGCTCCTGGAAACGGGTGGTAATGCTGGATGCTCCAACTTGACGCATGTTTTGTTGGGAAAGTGTTTAGCGGCATGGGATGGGGTCGCGTCCTATCAGCTTGTAGGCGGGGTAATGGCCCACCTAGGCTTCGACGGGTAGCCGGCCTGAGAGGGCGGACGGCCACATTGGGACTGAGATACGGCCCAG	0	0	0	0	0	0	0	0	0	0	0	0	0	0	0	0	307	0	0	0	0	0	0	0	0	0	0	0	0	0	0	0	0	0	0	0	0	0	0	0	0	0	0	0	0	0	0	0
310	GACGAACGCTGGCGGCGTGCCTAATACATGCAAGTTGAGCGATGAAGATTGGTGCTTGCACCAATTTGAAGAGCAGCGAACGGGTGAGTAACGCGTGGGGAATCTGCCTTTGAGCGGGGGACAACATTTGGAAACGAATGCTAATACCGCATAACAACTTTAAACATAAGTTTTAAGTTTGAAAGATGCAATTGCATCACTCAAAGATGATCCCGCGTTGTATTAGCTAGTTGGTGAGGTAAAGGCTCACCAAGGCGATGATACATAGCCGACCTGAGAGGGTGATCGGCCACATTGGGACTGAGACACGGCCCAA	0	0	0	0	0	0	0	0	0	0	0	0	0	0	0	0	0	0	0	0	0	0	0	0	0	0	0	0	0	0	0	0	0	0	0	0	0	0	0	0	0	0	0	0	0	0	0	0
311	GACGAACGCTGGCGGCGTGCCTAATACATGCAAGTCGAGCGAGCGGAACCAACAGATTTACTTCGGTAATGACGTTGGGAAAGTGAGCGGCGGATGGGTGAGTAACACGTGGGGAACCTGCCCCGTAGTCTGGGATACCATTTGGAAACAGGTGCTAATACCGGATAAGAAAGCAGATCGCATGATCAGCTTTTAAAAGGCGGCGTAAGCTGTCGCTATGGGATGGCCCCGCGGTGCATTAGTTAGTTGGTAAGGTAACGGCTTACCAAGGCAATGATGCATAGCCGAGTTGAGAGACTGATCGGCCACATTGGGACTGAGACACGGCCCAA	0	0	0	0	0	0	0	0	0	0	0	0	0	0	0	0	0	0	0	599	0	0	0	0	0	580	0	0	0	0	0	0	0	0	0	0	0	0	0	0	0	0	0	0	0	0	0	0
312	ATTGAACGCTGGCGGCATGCCTTACACATGCAAGTCGAACGGCAGCGCGGGAGCAATCCTGGCGGCGAGTGGCGAACGGGTGAGTAATATATCGGAACGTGCCCAGTAGTGGGGGATAGCCCGGCGAAAGCCGGATTAATACCGCATACGACCTGAGGGTGAAAGCGGGGGATCGCAAGACCTCGCGCTACTGGAGCGGCCGATATCAGATTAGCTAGTTGGTGGGGTAAAGGCCTACCAAGGCAACGATCTGTAGTTGGTCTGAGAGGACGACCAGCCACACTGGGACTGAGACACGGCCCAG	0	0	0	0	0	0	0	0	0	0	0	0	0	555	0	0	0	2	0	0	0	0	0	0	0	0	0	0	3	0	594	0	0	0	182	0	0	0	0	0	0	0	0	0	0	0	0	0
313	GATGAACGCTGGCGGCGTGCTTAACACATGCAAGTCGAACGGTGAAAGAGAGCTTGCTCTCTGGATCAGTGGCGAACGGGTGAGTAACACGTGAGCAATCTGCCCCTGACTCTGGGATAACAGCTGGAAACAGCTGCTAATACCGGATACGAGCTGCGAAGGCATCTTCAGCAGCTGGAAAGAATTTCGGTCAGGGATGAGCTCGCGGCCTATCAGCTTGTTGGTGAGGTAATGGCTCACCAAGGCGTCGACGGGTAGCCGGCCTGAGAGGGTGACCGGCCACACTGGGACTGAGACACGGCCCAG	0	0	0	0	0	0	0	0	0	811	0	4	0	0	0	0	0	0	0	0	0	0	0	0	0	0	0	0	0	0	0	0	0	0	0	0	0	0	0	0	0	0	0	0	0	0	0	0
314	GATGAACGCTGGCGGCGTGCTTAACACATGCAAGTCGAACGGAAAGGCCCAAGCTTGCTTGGGTACTCGAGTGGCGAACGGGTGAGTAACACGTGGGTGATCTGCCCTGCACTTCGGGATAAGCCTGGGAAACTGGGTCTAATACCGGATAGGACGATGGTTTGGATGCCATTGTGGAAAGTTTTTTCGGTGTGGGATGAGCTCGCGGCCTATCAGCTTGTTGGTGGGGTAATGGCCTACCAAGGCGTCGACGGGTAGCCGGCCTGAGAGGGTGTACGGCCACATTGGGACTGAGATACGGCCCAG	0	0	0	0	0	0	0	0	0	0	0	0	0	0	0	0	0	0	0	7	0	0	0	0	0	0	0	0	0	0	0	0	0	0	0	0	0	0	0	0	0	0	0	0	0	0	0	0
315	GATGAACGCTGGCGGCGTGCTTAACACATGCAAGTCGAACGGAAAGGCTCCTGCTTGCAGGGGTACTCGAGTGGCGAACGGGTGAGTAACACGTGGGTGATCTGCCCTGCACTTCGGGATAAGCCTGGGAAACTGGGTCTAATACCGGATAGGACGATGGTTTGGATGCCATTGTGGAAAGTTTTTTCGGTGTGGGATGAGCTCGCGGCCTATCAGCTTGTTGGTGGGGTAATGGCCTACCAAGGCGTCGACGGGTAGCCGGCCTGAGAGGGTGTACGGCCACATTGGGACTGAGATACGGCCCAG	0	0	0	0	0	0	0	213	0	0	0	0	0	0	0	0	0	0	0	22	0	240	0	0	28	0	0	0	0	0	0	0	0	0	0	0	0	502	0	0	0	0	0	0	0	0	0	0
316	GATGAACGCTGGCGGCGTGCCTAATACATGCAAGTCGAGCGAACAGACAAGGAGCTTGCTCCTTTGACGTTAGCGGCGGACGGGTGAGTAACACGTGGGTAACTTACCTATAAGACTGGGATAACTTCGGGAAACCGGAGCTAATACCGGATAATATTTCGAACCGCACGGTTCGATAGTGAAAGATGGTTTTGCTATCACTTATAGATGGACCCGCGCCGTATTAGCTAGTTGGTAAGGTAACGGCTTACCAAGGCGACGATACGTAGCCGACCTGAGAGGGTGATCGGCCACACTGGAACTGAGACACGGTCCAG	0	0	0	0	0	0	0	0	0	0	0	0	0	0	0	0	0	0	0	0	0	0	0	0	0	0	0	0	0	0	0	0	0	0	0	0	0	0	0	0	0	0	0	0	0	0	0	0
317	GACGAACGCTGGCGGCGTGCCTAATACATGCAAGTAGAACGCTGAAGGAGGAGCTTGCTTCTCTGGATGAGTTGCGAACGGGTGAGTAACGCGTAGGTAACCTGCCTGGTAGCGGGGGATAACTATTGGAAACGATAGCTAATACCGCATAAGAGTAGATGTTGCATGACATTTGCTTAAAAGGTGCAATTGCATCACTACCAGATGGACCTGCGTTGTATTAGCTAGTTGGTGGGGTAACGGCTCACCAAGGCGACGATACATAGCCGACCTGAGAGGGTGATCGGCCACACTGGGACTGAGACACGGCCCAG	0	0	0	0	0	0	21	0	0	0	0	0	0	0	0	3	0	0	0	620	0	0	0	0	0	518	0	0	0	0	0	0	0	0	0	2	0	0	0	0	0	0	0	0	0	0	0	0
318	GACGAACGCTGGCGGCGCGCTTAACACATGCAAGTCGAGCGATGAAATCTTGACAGATCCCTTCGGGGTGAAGATAAGATGGATTAGCGGCGGACGGGTGAGTAACACGTGAGTAACCTGCCTTAGACATTGGGATAGCCTCGGGAAACCGGGATTAATACCAAATGAAATCATAGGTGCCCATGCACTAATGATCAAAACTCCGGTGGTCTAAGATGGACTCGCGTCCCATTAGCTAGTTGGTGAGGTAACGGCCCACCAAGGCGACGATGGGTAGCCGGCCTGAGAGGGTGAACGGCCACATTGGAACTGAGAAACGGTCCAA	0	0	0	0	0	0	0	0	0	0	0	0	0	0	0	0	0	0	7	0	0	0	0	0	0	0	0	0	0	0	0	0	0	0	0	0	11	0	0	0	0	0	0	14	0	0	0	0
319	GATGAACGCTGGCGGCATGCCTAACACATGCAAGTCGATCGGTAAGGCCCTTCGGGGTACACGAGAGGCGGACGGCTGAGTAACGCGTGGGAACGCACCCTACACTGAGGGATAAGATACCGAAAGGTGTTCTAATACCGCATACGGTCTTCGGATTAAAGTCTTCGGACGGTGAAGGAGCGGCCCGCGTCATATTAGGTAGTTGGTGGGGTAATGGCCTACCAAGCCGATGATGTGTAGCTGGTCTGAGAGGATGATCAGCCAGACTGGAACTGAGAACGGTCCAG	0	0	0	0	0	0	0	0	0	0	0	0	0	0	0	0	0	0	0	0	0	0	0	0	0	0	0	0	0	0	0	0	0	0	0	0	0	0	0	0	0	0	0	0	0	0	0	0
320	GATGAACGCTGGCGGCGTGCTTAACACATGCAAGTCGAACGGAAAGGCTCCTGCTTGCAGGGGTACTCGAGTGGCGAACGGGTGAGTAACACGTGGGTGATCTGCCCCGCACTTCGGGATAAGCCTGGGAAACTGGGTCTAATACCGGATAGGACCACTTCTTGGAGGTTGTGGTGGAAAGTTTTTTCGGTGTGGGATGAGCTCGCGGCCTATCAGCTTGTTGGTGGGGTAATGGCCTACCAAGGCGTCGACGGGTAGCCGGCCTGAGAGGGTGTACGGCCACATTGGGACTGAGATACGGCCCAG	0	0	0	0	0	0	0	0	0	0	0	0	0	0	0	0	0	0	0	0	0	0	0	0	0	0	0	8	0	0	0	0	0	0	0	0	0	0	0	0	0	0	0	0	0	0	0	0
321	AACGAACGTTAGCGGCGCGCCTAACACATGCAAGTCGCACGAGAAGGGGCTTCGGCCCTAGTACAGTGGCGCACGGGTGAGTAACACGTGGGTAACGTTCCCTTGGGCGGGGGATAACCTTCCGAAAGGAGGGCTAATACCGCATAAGACCACGGCCTCGAAAGGGGCTGCGGTAAAAGCAGGCCTCTGCATGCAAGCTTGCACCTAAGGATCGGCCCGCGGCCCATCAGCTAGTTGGTAGGGTAACGGCCTACCAAGGCTAAGACGGGTAGCTGGTCTGAGAGGATGATCAGCCACACTGGAACTGAGACACGGTCCAG	0	0	0	0	0	0	0	0	0	754	0	0	0	0	0	0	0	0	0	0	0	0	0	0	0	0	0	0	0	0	0	1095	0	0	0	0	0	0	0	0	0	15	0	0	0	0	0	0
322	GATGAACGCTAGCGGCAGGCTTAATACATGCAAGTCGTGGGGCAGCACAGGTAGCAATACTGGGTGGCGACCGGCAAACGGGTGCGGAACACGTACGCAACCTTCCTTTAAGCGGGGAATAGCCCAGGGAAACTTGGATTAATACCCCATAAGACAGTGGTGTGGCATCACACAGCTGTTAAAGCTCCGGCACTTAAAGATGGGCGTGCGGCTGATTAGGTAGTTGGCGGGGTAATGGCCCACCAAGCCGACGATCAGTAACTGGTGTGAGAGCACGACCAGTCACACGGGCACTGAGACACGGGCCCG	0	0	0	0	0	0	0	0	0	0	0	0	0	0	0	0	0	0	0	0	0	0	0	0	0	0	0	0	0	0	0	0	0	0	0	0	0	0	0	0	0	0	0	0	0	0	0	0
323	GATGAACGCTGGCGGCGTGCCTAATACATGCAAGTCGAGCGAACAGATAAGGAGCTTGCTCCTTTGACGTTAGCGGCGGACGGGTGAGTAACACGTGGATAACCTACCTATAAGACTGGGATAACTTCGGGAAACCGGAGCTAATACCGGATAAGATTTTGAACCGCATGGTTCAATAGTGAAAGACGGCCTTGCTGTCACTTATAGATGGATCCGCGCCGTATTAGCTAGTTGGTAAGGTAACGGCTTACCAAGGCAACGATACGTAGCCGACCTGAGAGGGTGATCGGCCACACTGGAACTGAGACACGGTCCAG	0	0	0	0	0	0	0	0	0	0	264	0	0	0	0	0	0	0	0	0	0	0	0	0	0	0	0	0	0	0	0	0	0	0	0	16	0	0	0	121	0	0	0	0	0	0	0	0
324	GACGAACGCTGGCGGCGTGCCTAATACATGCAAGTCGAGCGAGCGGAACTAACAGATTTACCTCGGTAATGACGTTAGGAAAGCGAGCGGCGGATGGGTGAGTAACACGTGGGGAACCTGCCCCATAGTCTGGGATACCACTTGGAAACAGGTGCTAATACCGGATAAGAAAGCAGATCGCATGATCAGCTTTTAAAAGGCGGCGTAAGCTGTCGCTATGGGATGGCCCCGCGGTGCATTAGCTAGTTGGTAAGGCAAAGGCTTACCAAGGCGATGATGCATAGCCGAGTTGAGAGACTGATCGGCCACATTGGGACTGAGACACGGCCCAA	0	0	0	0	0	0	0	0	0	0	0	0	0	0	0	0	0	0	0	0	0	0	0	0	0	0	0	0	0	0	0	0	0	0	0	0	0	0	0	0	0	0	0	0	0	0	0	0
325	GATTAACGCTGGCGGCGTGCATAACACATGCAAGTCGAACGATGAAACTTAAATGAACTCTTCGGAGTGATTTCAAGTGGATTAGTGGCGGACGGGTGAGTAACGCGTGAGTAACCTGCCTTAGAGAAGGGGATAGCCTTTGGAAACGAAGAATAATACCCTATAACACCAACCCCTCGCATGAAGGGCTGGTCAAAGATTTATCGCTCTAAGATGGACTTGCGTCTGATTAGCTAGTTGGTGAGATAACAGCCCACCAAGGCAACGATCAGTAGCCGGCTTGAGAGAGTGTACGGCCACATTGGGACTGAGACACGGCCCAG	0	0	0	0	0	0	0	0	0	0	0	0	0	0	0	0	0	0	0	0	0	0	0	0	0	0	0	0	0	0	0	0	0	0	0	0	0	0	0	0	0	0	0	0	0	0	0	0
326	GATGAACGCTGGCGGCGTGCCTAATACATGCAAGTCGAGCGAACAGACGAGGAGCTTGCTCCTCTGACGTTAGCGGCGGACGGGTGAGTAACACGTGGATAACCTACCTATAAGACTGGGATAACTTCGGGAAACCGGAGCTAATACCGGATAATATATTGAACCGCATGGATCAATAGTGAAAGACGGTTTTGCTGTCACTTATAGATGGATCCGCGCCGCATTAGCTAGTTGGTAAGGTAACGGCTTACCAAGGCAACGATGCGTAGCCGACCTGAGAGGGTGATCGGCCACACTGGAACTGAGACACGGTCCAG	0	0	0	0	0	0	0	0	0	0	0	0	0	0	0	0	0	0	0	0	0	0	0	0	0	0	0	0	0	0	0	0	0	0	0	0	0	0	0	0	0	0	0	0	0	0	0	0
327	GATGAACGCTAGCTACAGGCTTAACACATGCAAGTCGAGGGGCAGCATGAACTTAGCTTGCTAAGTTTGATGGCGACCGGCGCACGGGTGAGTAACACGTATCCAACCTGCCGATGACTCGGGGATAGCCTTTCGAAAGAAAGATTAATACCCGATGGCATAGTTCTTCCGCATGGTAGAACTATTAAAGAATTTCGGTCATCGATGGGGATGCGTTCCATTAGGTTGTTGGCGGGGTAACGGCCCACCAAGCCTTCGATGGATAGGGGTTCTGAGAGGAAGGTCCCCCACATTGGAACTGAGACACGGTCCAA	0	0	0	0	0	0	0	0	0	0	0	0	0	0	0	0	0	0	0	81	0	0	9	0	0	123	0	0	0	0	0	0	0	0	0	0	0	0	0	0	0	0	0	0	0	0	0	0
328	GATGAACGCCGGCGGTGTGCCTAATACATGCAAGTCGAGCGCACTGGCCCAACTGATATGACGTGCTTGCACTGAATTGACGTTGGATTACCAGTGAGCGGCGGACGGGTGAGTAACACGTGGGCAACCTGCCCTGGAGCGGGGGATAACATCTGGAAACAGGTGCTAATACCGCATAACAACGAAAACCACATGGTTTTCGTTTCAAAGATGGTTTCGGCTATCACTTCAGGATGGGCCCGCGGTGCATTAGCTAGTTGGTAAGGTAACGGCTTACCAAGGCAATGATGCATAGCCGAGTTGAGAGACTGATCGGCCACAATGGAACTGAGACACGGTCCAT	0	0	0	0	0	0	0	0	0	0	0	0	0	0	0	0	0	0	0	0	0	0	0	0	0	0	0	0	0	0	0	0	0	0	0	0	0	0	0	0	0	0	0	0	0	0	0	0
329	GATGAACGCTGACAGAATGCTTAACACATGCAAGTCAACTTGAATTTGGGTTTTTAACTTAGATTTGGGTGGCGGACGGGTGAGTAACGCGTAAAGAACTTGCCTCACAGCTAGGGACAACATTTAGAAATGAATGCTAATACCTGATATTATGATTTTAAGGCATCTTAGAATTATGAAAGCTATATGCGCTGTGAGAGAGCTTTGCGTCCCATTAGCTAGTTGGAGAGGTAACAGCTCACCAAGGCGATGATGGGTAGCCGGCCTGAGAGGGTGAACGGCCACAAGGGGACTGAGACACGGCCCTT	0	0	0	0	0	0	0	0	0	0	0	0	0	0	0	0	0	0	20	0	0	0	0	0	0	0	0	0	0	0	0	0	0	0	0	0	0	0	0	0	0	0	581	0	0	0	0	0
330	GACGAACGCTGGCGGCGTGCCTAATACATGCAAGTAGAACGCTGAGGTTTGGTGTTTACACTAGACTGATGAGTTGCGAACGGGTGAGTAACGCGTAGGTAACCTGCCTCATAGCGGGGGATAACTATTGGAAACGATAGCTAATACCGCATAAGAGTAATTAACACATGTTGGTTATTTAAAAGGAGCAATTGCTTCACTGTGAGATGGACCTGCGTTGTATTAGCTAGTTGGTGAGGTAAAGGCTCACCAAGGCGACGATACATAGCCGACCTGAGAGGGTGATCGGCCACACTGGGACTGAGACACGGCCCAG	0	0	0	0	0	0	0	0	0	0	0	0	0	0	0	0	0	9	0	0	0	0	0	0	0	0	0	0	0	0	0	0	0	0	0	0	0	0	0	0	0	0	0	0	0	0	0	0
331	GATGAACGCTGGCGGCGTGCCTAATACATGCAAGTCGAGCGAACAGATAAGGAGCTTGCTCCTTTGACGTTAGCGGCGGACGGGTGAGTAACACGTGGGTAACCTACCTATAAGACTGGAATAACTCCGGGAAACCGGGGCTAATGCCGGATAACATTTAGAACCGCATGGTTCTAAAGTGAAAGATGGTTTTGCTATCACTTATAGATGGACCCGCGCCGTATTAGCTAGTTGGTAAGGTAACGGCTTACCAAGGCAACGATACGTAGCCGACCTGAGAGGGTGATCGGCCACACTGGAACTGAGACACGGTCCAG	0	0	0	0	0	0	0	259	0	0	0	0	0	0	1097	0	0	0	0	0	0	0	0	0	0	0	0	0	0	0	0	0	0	0	0	0	0	0	0	0	0	0	0	0	0	0	0	0
332	GATGAACGCTAGCGGCAGGCTTAATACATGCAAGTCGTGGGGCAGCAGCTTTGTAGCAATACAGAGGCTGGCGACCGGCAAACGGGTGCGGAACACGTACACAACCTTCCTTTAAGTGGGGAATAGCCCAGAGAAATTTGGATTAATACCCCGTAACATTATGATGTGGCATCACATTGTAATTATAGCTTCGGCGCTTAATGATGGGTGTGCGGCTGATTAGGTAGTTGGCGGGGTAACGGCCCACCAAGCCTGCGATCAGTAACTGGTGTGAGAGCACGACCAGTCACACGGGCACTGAGACACGGGCCCG	0	0	0	0	0	0	0	0	0	0	0	0	0	0	0	0	0	0	0	0	0	0	0	0	0	0	0	0	0	0	0	0	0	0	0	0	0	0	0	0	0	0	0	0	0	0	0	0
333	GACGAACGCTGGCGGCGTGCTTAACACATGCAAGTCGAACGGAAAGGCCTCTTCGGAGGTACTCGAGTGGCGAACGGGTGAGTAACACGTGGGTGATCTGCCCTGCACTCTGGGATAAGCCTGGGAAACTGGGTCTAATACCGGATAGGACCATGCTTTAGTGTGTGTGGTGGAAAGTTTTTTCGGTGTAGGATGAGCCCGCGGCCTATCAGCTTGTTGGTGGGGTAATGGCCTACCAAGGCGGCGACGGGTAGCCGGACTGAGAGGTTGGTCGGCCACATTGGGACTGAGATACGGCCCAG	0	0	0	0	0	0	0	0	0	0	0	0	0	0	0	0	0	0	0	0	0	0	0	0	0	0	0	0	0	0	0	0	0	0	0	0	0	0	0	0	0	0	0	0	0	0	0	0
334	GATGAACGCTAGCGGGAGGCCTAACACATGCAAGCCGAGCGGGATTTGTTGGTTAGCTTGCTAACTAACAATGAGAGCGGCGTACGGGTGCGTAACACGTGTGCAACCTGCCTTTATCTGGGGGATAGCCTTTCGAAAGGAAGATTAATACCCCATAATATATTGATTGGCATCAGTTAATATTGAAAGCTCCGGCGGATAGAGATGGGCACGCGTAAGATTAGCTAGTTGGTGAGGTAACGGCTCACCAAGGCTGCGATCTTTAGGGGGCCTGAGAGGGTGATCCCCCACACTGGTACTGAGACACGGACCAG	0	0	0	0	0	0	0	0	0	0	0	0	0	0	0	0	0	0	0	0	0	0	0	0	0	0	0	0	0	0	0	2134	0	0	0	0	0	0	0	0	0	0	0	0	0	0	0	0
335	GATAAACGCTGGCGGCGTGCTTAACACATGCAAGTTGGACGGGAATACTCGAGGAAGAGACTTCGGTTAATTTTTTGGGTATGAGAGTAGCGGACGGGTGAGTAATGCATAAGAATCTATCCATCAGAGGGGGACAACTGCGGGAAACCGGAGCTAATACCCCGTAAGCCGGAAGGTGAAAGGGAGCAATCCGCTGATGGAGGAGCTTGTGTCCTATCAGGTAGTTGGTGAGGTAAGAGCTCACCAAGCCGAAGACGGGTAGCCGGACTGAGAGGTTGTACGGCCACATTGGAACTGAGAGACGGTCCAG	0	0	0	0	0	0	0	0	0	0	0	0	0	0	0	0	0	0	0	0	0	0	0	0	0	0	161	0	982	0	0	0	0	0	0	0	0	2	0	0	17	0	608	0	0	0	0	0
336	ATTGAACGCTGGCGGCATGCCTTACACATGCAAGTCGAACGGTAACGGGTCCTTCGGGATGCCGACGAGTGGCGAACGGGTGAGTAATATATCGGAACGTGCCCAGTAGTGGGGGATAACTGCTCGAAAGAGCAGCTAATACCGCATACGACCTGAGGGTGAAAGGGGGGGATCGCAAGACCTCTCGCTATTGGAGCGGCCGATATCAGATTAGCTAGTTGGTGGGGTAAAGGCCTACCAAGGCAACGATCTGTAGTTGGTCTGAGAGGACGACCAGCCACACTGGGACTGAGACACGGCCCAG	0	0	0	0	0	0	0	0	0	0	0	0	0	0	0	0	0	0	0	0	0	0	0	0	0	0	0	0	0	0	0	0	0	0	0	0	0	0	0	0	0	0	0	0	0	0	0	0
337	GATGAACGCTGGCGGCGTGCCTAATACATGCAAGTCGAGCGAACAGACAAGGAGCTTGCTCCTTTGACGTTAGCGGCGGACGGGTGAGTAACACGTGGGTAACCTACCTATAAGACTGGGATAACTTCGGGAAACCGGAGCTAATACCGGATAATATTTCGAACCGCATGGTTCGATAGTGAAAGATGGCTCTGCTATCACTTATAGATGGACCTGCGCCGTATTAGCTAGTTGGTAAGGTAACGGCTTACCAAGGCAACGATACGTAGCCGACCTGAGAGGGTGATCGGCCACACTGGAACTGAGACACGGTCCAG	0	0	0	0	0	0	0	0	0	0	0	0	0	0	0	0	1530	0	0	0	0	0	0	0	0	0	0	0	0	0	0	0	0	0	0	0	0	0	0	0	0	0	0	0	0	0	0	0
338	GATGAACGCTGGCGGCGTGCTTAACACATGCAAGTCGAACGATGAAGCCCAGCTTGCTGGGTGGATTAGTGGCGAACGGGTGAGTAACACGTGAGTAACCTGCCCTTAACTCTGGGATAAGCCTGGGAAACTGGGTCTAATACCGGATAGGAGCGTCCACCGCATGGTGGGTGTTGGAAAGATTTATCGGTTTTGGATGGACTCGCGGCCTATCAGCTTGTTGGTGAGGTAATGGCTCACCAAGGCGACGACGGGTAGCCGGCCTGAGAGGGTGACCGGCCACACTGGGACTGAGACACGGCCCAG	0	0	0	0	0	0	0	0	0	0	0	0	0	0	2	0	0	0	0	0	0	20	0	0	0	0	0	0	0	61	0	0	0	390	0	0	0	0	0	0	0	0	0	0	0	0	0	0
339	AACGAACGTTAGCGGCGCGCCTAACACATGCAAGTCGCACGAGAAAGGGCTTCGGCCCCTGTACAGTGGCGCACGGGTGAGTAACACGTGGGTAACGTTCCCTCAGGCGGGGGATAACCCTTCGAAAGGAGGGCTAATACCGCATAAGACCACGACCTCGCAAGAGGACGCGGTCAAAGCAGGCCTCTACATGTAAGCTTGCACCAGAGGATCGGCCCGCGGCCCATCAGCTAGTTGGTAGGGTAATGGCCTACCAAGGCTAAGACGGGTAGCTGGTCTGAGAGGATGATCAGCCACACTGGAACTGAGACACGGTCCAG	0	230	0	0	0	0	0	215	0	0	0	0	0	0	0	0	0	0	0	0	0	0	0	0	0	0	0	0	0	0	0	0	0	0	0	0	0	0	0	0	0	0	0	0	0	0	0	0
340	GACGAACGCTGGCGGCGTGCTTAACACATGCAAGTCGAACGGAAAGGCCCTTCCTTTTTTGGTTGGGTGCTCGAGTGGCGAACGGGTGAGTATTACGTGAGTAACCTGCCCTCAACTGTGGGATAAGCCTGGGAAACTGGGTCTAATACTGCATATTCTTCTTTCACCGCATGGTGGGGGTTGGAAAGTTTTTTCGGTTGGGGATGGGCTCGCGGCCTATCAGCTTGTTGGTGGGGTGATGGCCTACCAAGGCGGTGACGGGTAGCCGGCCTGAGAGGGTGGTCGGCCACATTGGGACTGAGATACGGCCCAG	0	0	0	0	0	0	0	0	0	0	0	0	0	0	0	0	0	0	73	0	0	0	0	0	0	0	0	0	0	0	0	0	0	0	0	0	0	0	0	0	0	0	0	0	0	0	0	0
341	GACGAACGCTGGCGGTGTGCCTAATACATGCAAGTCGAGCGAGCGGAACTAACAGATTTACTTCGGTAATGACGTTAGGAAAGCGAGCGGCGGATGGGTGAGTAACACGTGGGGAACCTGCCCCATAGTCTGGGATACCACTTGGAAACAGGTGCTAATACCGGATAAGAAAGCAGATCGCATGATCAGCTTTTAAAAGGCGGCGTAAGCTGTCGCTATGGGATGGCCCCGCGGTGCATTAGCTAGTTGGTAAGGTAAAGGCTTACCAAGGCGATGATGCATAGCCGAGTTGAGAGACTGATCGGCCACATTGGGACTGAGACACGGCCCAA	0	0	0	0	0	0	0	0	0	0	0	0	0	0	0	0	0	0	0	0	0	0	0	0	0	0	0	0	0	0	0	0	0	0	0	0	0	0	0	0	0	0	0	0	0	0	0	0
342	AACGAACGCCAGCGGCGTGGATTAGGCATGCAAGTCGAACGTGATCCGTAGCAATACGGTGAAAGTGGCGGAAGGGTGAGTAATGCATAGATAACCTACCTCCGAATCTGGGATAACTCCGGGAAACTGGAGCTAATACCGGATGGGATAGCTGGGTCGCATGGTTCGGCTATTAAAGGTGCCCTCTTTACAATGGTACCGTTCGGGGAGGGGTCTATGTCCTATCAGCTAGTTGGTGAGGGTAAAAGCCCACCAAGGCATTGACGGGTAGCCGGCCTTAGCGGGTGTCCGGCCACATTGGGACTGAGACACTGCCCAA	0	0	0	0	0	0	0	0	130	0	0	0	0	0	0	0	0	0	0	0	0	5	0	0	0	0	0	0	0	0	0	0	0	0	0	0	0	0	0	0	0	0	0	0	0	0	0	0
343	GACGAACGCTGGCGGCGTGCTTAACACATGCAAGTCGAACGGGATTTAGTAAACAGAAGCTTCGGTGGAAGATTACTAATGAGAGTGGCGAACGGGTGAGTAACGCGTGAGCAACCTGCCTATGACAGTGGGATAGCCTCGGGAAACCGGGATTAATACCGCATAAAATCGTAGAAACACATGTTTCAACGGTCAAAGATTTATCGGTCATAGATGGGCTCGCGTCTGATTAGCTAGTTGGTGAGATAACAGCCCACCAAGGCGACGATCAGTAGCCGGTCTGAGAGGATGAACGGCCACATTGGAACTGAGACACGGTCCAA	0	0	0	0	0	0	0	0	0	0	0	0	0	0	0	0	0	0	0	0	0	0	0	0	0	0	0	0	0	0	0	0	0	0	0	0	0	0	0	0	0	0	0	0	0	0	0	0
344	GATGAACGCTGGCGGCGTGCTTAACACATGCAAGTCGAACGGGATCCCAGGAGCTTGCTCCTGGGTGAGAGTGGCGAACGGGTGAGTAATGCGTGACCGACCTGCCCCATACACCGGAATAGCTCCTGGAAACGGGTGGTAATGCCGGATGCTCCGACATGACGCATGTCGTGTCGGGAAAGATTCATCGGTATGGGATGGGGTCGCGTCCTATCAGCTTGATGGCGGGGTAACGGCCCACCATGGCTTCGACGGGTAGCCGGCCTGAGAGGGCGACCGGCCACATTGGGACTGAGATACGGCCCAG	0	0	0	0	0	0	0	0	0	0	0	0	0	0	0	0	0	0	0	0	0	0	0	0	0	0	0	0	0	0	0	0	0	0	0	0	0	0	0	0	0	0	0	0	0	0	0	0
345	GATGAACGCTAGCTACAGGCTTAACACATGCAAGTCGAGGGGCAGCATGGTCTTAGCTTGCTAAGGCTGATGGCGACCGGCGCACGGGTGAGTAACACGTATCCAACCTGCCGTCTACTCTTGGCCAGCCTTCTGAAAGGAAGATTAATCCAGGATGGCATCATGAGTTCACATGTCCGCATGATTAAAGGTATTTTCCGGTAGACGATGGGGATGCGTTCCATTAGATAGTAGGCGGGGTAACGGCCCACCTAGTCAACGATGGATAGGGGTTCTGAGAGGAAGGTCCCCCACATTGGAACTGAGACACGGTCCAA	0	0	0	0	0	0	0	250	0	0	0	0	0	0	0	0	0	0	0	61	0	0	0	0	0	38	0	0	0	0	0	0	0	0	0	86	0	0	3	0	0	0	0	0	0	0	0	0
346	ATTGAACGCTGGCGGCATGCTTTACACATGCAAGTCGGACGGCAGCACAGAGAAGCTTGCTTCTTGGGTGGCGAGTGGCGAACGGGTGAGTAACATATCGGAACGTACCGAGCAGTGGGGGATAACTAATCGAAAGATTAGCTAATACCGCATATATTCTGAGGAAGAAAGCAGGGGACCATTTGGCCTTGCGCTGTTTGAGCGGCCGATATCTGATTAGCTAGTTGGTGGGGTAAAGGCCTACCAAGGCGACGATCAGTAGCGGGTCTGAGAGGATGATCCGCCACACTGGGACTGAGACACGGCCCAG	0	0	0	0	0	0	0	0	0	0	0	0	0	0	0	0	0	0	0	0	0	0	0	0	0	0	0	0	0	0	0	0	0	0	0	0	0	0	0	0	0	0	0	0	4	0	0	0
347	GATGAACGCTGGCGGCGTGCTTAACACATGCAAGTCGAACGGGATCCATCGGGTTTTGCTTGGTGGTGAGAGTGGCGAACGGGTGAGTAATGCGTGACCGACCTGCCCCATACACCGGAATAGCTCCTGGAAACGGGTGGTAATGCCGGATGTTCCAGTTGATCGCATGGTCTTCTGGGAAAGCTTTCGCGGTATGGGATGGGGTCGCGTCCTATCAGCTTGACGGCGGGGTAACGGCCCACCGTGGCTTCGACGGGTAGCCGGCCTGAGAGGGCGACCGGCCACATTGGGACTGAGATACGGCCCAG	0	0	0	0	0	0	0	0	0	0	0	0	0	0	0	0	0	0	0	0	0	0	0	0	0	0	0	0	0	0	0	0	0	0	0	0	0	0	0	0	0	0	0	0	0	0	0	0
348	GACGAACGCTGGCGGCGTGCCTAATACATGCAAGTCGAGCGAGTCTGCCTTGAAGATCGGAGTGCTTGCACTCTGTGAAACAAGATACAGGCTAGCGGCGGACGGGTGAGTAACACGTGGGTAACCTGCCCAAGAGATCGGGATAACACCTGGAAACAGATGCTAATACCGGATAACAACAGATGATGCCTATCAACTGTTTAAAAGATGGTTCTGCTATCACTTTTGGATGGACCTGCGGTGCATTAGCTAGTTGGTAGGGTAACGGCCTACCAAGGCGATGATGCATAGCCGAGTTGAGAGACTGATCGGCCACATTGGGACTGAGACACGGCCCAA	0	0	0	0	0	0	0	0	0	0	0	0	0	0	0	0	0	0	0	0	0	0	0	0	0	0	0	0	0	0	0	0	0	0	0	0	0	0	0	0	0	0	0	0	0	0	0	0
349	ATTGAACGCTGGCGGCAGGCCTAACACATGCAAGTCGAGCGGTAGCACAGAGAGCTTGCTCTCGGGTGACGAGCGGCGGACGGGTGAGTAATGTCTGGGAAACTGCCTGATGGAGGGGGATAACTACTGGAAACGGTAGCTAATACCGCATAACGTCGCAAGACCAAAGTGGGGGACCTTCGGGCCTCATGCCATCAGATGTGCCCAGATGGGATTAGCTGGTAGGTGGGGTAACGGCTCACCTAGGCGACGATCCCTAGCTGGTCTGAGAGGATGACCAGCCACACTGGAACTGAGACACGGTCCAG	0	0	0	0	0	0	0	0	0	0	0	0	0	0	0	0	0	0	0	0	0	0	0	0	0	0	0	0	0	0	0	0	0	0	0	0	0	0	0	0	0	0	0	0	0	0	0	0
350	GACGAACGCTGGCGGCGTGCCTAATACATGCAAGTCGAGCGAGCTTGCCTATAGAAGTTCTTCGGAATGGACATAGATACAAGCTAGCGGCGGATGGGTGAGTAACGCGTGGGTAACCTGCCCTTAAGTCTGGGATACCATTTGGAAACAGATGCTAATACCAGATAAAAGCTACTTTCGCATGAAAGAAGTTTAAAAGGCGGCGTAAGCTGTCGCTAAAGGATGGACCTGCGATGCATTAGCTAGTTGGTAAGGTAACGGCTTACCAAGGCGATGATGCATAGCCGAGTTGAGAGACTGATCGGCCACATTGGGACTGAGACACGGCCCAA	0	0	0	0	0	0	0	0	0	0	0	0	0	0	0	0	0	0	0	0	0	0	0	0	0	0	0	0	0	0	0	0	0	0	0	0	0	0	0	0	0	0	0	0	0	0	0	0
351	ATTGAACGCTGGCGGCATGCCTTACACATGCAAGTCGAACGGTAACAGGTCTTCGGACGCTGACGAGTGGCGAACGGGTGAGTAATACATCGGAACGTGCCCAGTCGTGGGGGATAACTACTCGAAAGAGTAGCTAATACCGCATACGATCTGAGGATGAAAGCGGGGGACCTTCGGGCCTCGCGCGATTGGAGCGGCCGATGGCAGATTAGGTAGTTGGTGGGATAAAAGCTTACCAAGCCGACGATCTGTAGCTGGTCTGAGAGGACGACCAGCCACACTGGGACTGAGACACGGCCCAG	0	0	0	0	0	0	0	0	0	0	0	0	0	518	0	0	0	0	0	0	0	0	0	0	0	14	0	0	0	0	0	0	0	0	0	0	0	0	0	0	0	0	0	0	0	0	20	0
352	GATGAACGCTAGCTACAGGCTTAACACATGCAAGTCGAGGGGCAGCATGGTCTTAGCTTGCTAAGACTGATGGCGACCGGCGCACGGGTGAGTAACACGTATCCAACCTGCCGTCTACTCTTGGACAGCCTTCTGAAAGGAAGATTAATACAAGATGGCATCATGAGTCCGCATGTTCACATGATTAAAGGTATTCCGGTAGACGATGGGGATGCGTTCCATTAGATAGTAGGCGGGGTAACGGCCCACCTAGTCTTCGATGGATAGGGGTTCTGAGAGGAAGGTCCCCCACATTGGAACTGAGACACGGTCCAA	0	359	0	0	0	0	0	0	0	0	0	0	0	0	0	0	0	0	0	0	0	0	0	0	0	45	0	0	0	0	0	0	0	0	0	0	0	0	0	0	0	0	0	0	0	0	0	0
353	GACGAACGCTGGCGGCGTGCTTAACACATGCAAGTCGAACGATGAAGCCGCAGCTTGCTGTGGTGGATTAGTGGCGAACGGGCGAGTAACACGTGAGTAACCTGTCCTTTTCTTTGGGATAACGGCTGGAAACGGCTGCTAATACTGGATATTCAGGCTGCATCGCATGGTGTGGTTTGGAAAGGTTTTTTCTGGGATTGGGTGGGCTCGCGGCCTATCAGCTTGTTGGTGGGGTGATGGCTTACCAAGGCTTTGACGGGTAGCCGGCCTGAGAGGGTGGTCGGTCGCACTGGGACTGAGATACGGCCCAG	0	0	0	0	0	0	0	0	0	0	0	0	0	0	0	0	0	0	0	0	0	0	0	0	0	0	0	0	0	0	0	0	0	0	0	0	0	0	0	0	0	0	25	0	0	0	0	0
354	GATGAACGCCGGCGGTGTGCCTAATACATGCAAGTCGAGCGCACTGGCCCAACTGATATGATGTGCTTGCACTGAATTGACGTTGGATTCCCAGTGAGCGGCGGACGGGTGAGTAACACGTGGGCAACCTGCCCTGAAGCAGGGGATAACATCTGGAAACAGGTGCTAATACCGCATAACAACGAAAACCACATGGTTTTCGTTTTAAAGATGGTTTCGGCTATCACTTCAGGATGGGCCCGCGGTGCATTAGCTAGTTGGTAAGGTAACGGCTTACCAAGGCGATGATGCATAGCCGAGTTGAGAGACTGATCGGCCACAATGGAACTGAGACACGGTCCAT	0	0	0	0	0	0	0	0	0	0	0	0	0	0	0	0	0	0	0	0	0	0	0	0	0	0	0	0	0	0	0	0	0	0	0	0	0	0	0	0	0	0	0	0	0	0	0	0
355	GATGAACGCTAGCTACAGGCTTAACACATGCAAGTCGAGGGGCAGCATGAACTTAGCTTGCTAAGTTTGATGGCGACCGGCGCACGGGTGAGTAACACGTATCCAACCTGCCGATGACTCGGGGATAGCCTTTCGAAAGAAAGATTAATACCCGATGGCATAGTTCTTCCGCATGGTGGAACTATTAAAGAATTTCGGTCATCGATGGGGATGCGTTCCATTAGGTTGTTGGCGGGGTAACGGCCCACCAAGCCTTCGATGGATAGGGGTTCTGAGAGGAAGGTCCCCCACATTGGAACTGAGACACGGTCCAA	0	0	0	0	0	0	0	0	0	0	0	0	0	0	0	0	0	0	0	32	0	0	0	0	0	53	0	0	0	0	0	0	0	0	0	0	0	0	0	0	0	0	0	0	0	0	0	0
356	GACGAACGCTGGCGGCGTGCTTAACACATGCAAGTCGAACGATGAAGCCTAGCTTGCTAGGTGGATTAGTGGCGAACGGGTGAGTAATACGTGAGTAACCTACCTTTAACTCTGGGATAAGCCTGGGAAACTGGGTCTAATACCGGATACGACCAATCTCCGCATGGGGTGTTGGTGGAAAGCGTTATGTAGTGGTTATAGATGGGCTCACGGCCTATCAGCTTGTTGGTGAGGTAACGGCTCACCAAGGCGACGACGGGTAGCCGGCCTGAGAGGGTGACCGGCCACACTGGGACTGAGACACGGCCCAG	0	0	0	0	0	0	0	0	0	0	0	0	0	0	0	0	0	0	0	191	0	0	0	0	0	68	0	0	0	0	0	0	0	0	0	0	0	0	0	0	0	0	0	0	0	0	0	0
357	GACGAACGCTGGCGGCGTGCCTAATACATGCAAGTCGAACGCCTCTTTTTCCACCGGAGCTTGCTCCACCGGAAAAAGAGGAGTGGCGAACGGGTGAGTAACACGTGGGTAACCTGCCCATCAGAAGGGGATAACACTTGGAAACAGGTGCTAATACCGTATAACAATCGAAACCGCATGGTTTTGATTTGAAAGGCGCTTTCGGGTGTCGCTGATGGATGGACCCGCGGTGCATTAGCTAGTTGGTGAGGTAACGGCTCACCAAGGCCACGATGCATAGCCGACCTGAGAGGGTGATCGGCCACATTGGGACTGAGACACGGCCCAA	0	0	0	0	0	0	0	0	0	0	0	0	0	0	0	0	0	0	0	0	0	0	0	0	0	0	0	0	0	0	0	0	0	0	0	0	0	0	0	0	0	0	0	0	0	0	0	0
358	ATTGAACGCTGGCGGCATGCTTTACACATGCAAGTCGAACGGCAGCGAGGAGAAGCTTGCTTCTCTGTCGGCGAGTGGCGAACGGGTGAGTATAGCATCGGAACGTGCCAAGTAGTGGGGGATAACCAAACGAAAGTTTGGCTAATACCGCGTAAGCTCCAAGGAGGAAAGTAGGGGACCTAATAAGGCCTTACGCTATTTGATCGGCCGATGTCGGATTAGCTAGTTGGTGGGGTAATGGCTCACCAAGGCAATGATCCGTAGCGGGTCTGAGAGGACGATCCGCCACACTGGGACTGAGACACGGCCCAG	0	0	0	0	0	0	0	318	0	0	0	0	0	0	0	0	0	0	0	0	0	0	0	0	0	0	0	0	0	0	5	267	0	0	0	0	0	0	0	0	0	0	0	0	0	0	0	0
359	GATAAACGCTGACAGCATGCTTAACACATGCAAGTCTATGAGGAAGTTTAGCTTGCTAAATGGACTCATGGCGGACGGGTGAGTAACGCGTAAAGAACTTGCCCTTTAGACTGGGATAACAGAGGGAAACTTCTGATAATACTGGATAAGTTAGTATATCGCATGATATGCAAATGAAAGCTACGGCACTAAAGGAGAGCTTTGCGTCCTATTAGCTAGTTGGTAAGGTAAGAGCTTACCAAGGCGATGATAGGTAGCCGGCCTGAGAGGGTGGACGGCCACAAGGGGACTGAGATACGGCCCTT	0	0	0	0	0	0	0	0	0	0	0	0	0	0	0	0	0	0	0	0	0	0	0	0	0	0	0	0	0	0	0	0	0	0	0	0	0	0	0	0	0	0	0	0	0	0	0	0
360	GATGAACGCTAGCTACAGGCTTAACACATGCAAGTCGAGGGGAAACGGCATTAAGTGCTTGCACTTTTTGGACGTCGACCGGCGCACGGGTGAGTAACGCGTATCCAACCTGCCCCTTACCAGGGAATAACCCGTTGAAAGACGGACTAATGCCCTATGCAGTCCTTTGACGGCATCAGATTAGGACTAAAGATTCATCGGTATGGGATGGGGATGCGTCTGATTAGCTTGTTGGCGGGGTAACGGCTCACCAAGGCATCGATCAGTAGGGGTTCTGAGAGGAAGGTCCCCCACATAGGAACTGAGACACGGTCCTA	0	0	0	0	0	0	0	0	0	0	0	0	0	0	0	0	0	0	0	0	0	0	0	0	0	0	0	1114	4	0	752	0	0	0	0	0	0	0	0	0	0	0	0	0	0	0	0	0
361	GACGAACGCTGGCGGCGTGCTTAACACATGCAAGTCGAACGGGATTTAGTAGACAGAAGCCTCGGTGGAAGATTACTAATGAGAGTGGCGAACGGGTGAGTAACGCGTGAGCAACCTGCCTATGACAGTGGGATAGCCTCGGGAAACTGGGATTAATACCGCATAAAATCGTAGAAACACATGTTTCAACGGTCAAAGATTTATCGGTCATAGATGGGCTCGCGTCTGATTAGCTAGTTGGTGAGATAACAGCCCACCAAGGCGACGATCAGTAGCCGGTCTGAGAGGATGAACGGCCACATTGGAACTGAGACACGGTCCAA	0	0	0	0	0	0	0	0	0	0	0	0	0	0	0	0	0	0	0	0	0	0	0	0	0	0	0	0	0	0	0	0	0	0	0	0	0	0	0	0	0	0	0	0	0	0	0	0
362	GACGAACGCTGGCGGCGTGCCTAACACATGCAAGTCGAACGGGGCTTGTTATCCAGAATTTTTCGGAAGGACGGAGAACAAGGCTAGTGGCGGACGGGTGAGTAACGCGTGAGTAACCTGCCTTTCAGAGGGGGATAACGTTCTGAAAAGGACGCTAATACCGCATAACATATAGAGGTCGCATGGCAGCTATATCAAAGGAGCAATCCGCTGAGAGATGGACTCGCGTCTGATTAGATAGTTGGTGGGGTAACGGCCTACCAAGTCGACGATCAGTAGCCGGACTGAGAGGTTGAACGGCCACATTGGGACTGAGACACGGCCCAG	0	0	0	0	0	0	0	0	0	0	0	0	0	0	0	0	0	0	0	0	0	0	0	0	0	0	0	0	0	0	0	0	0	0	0	0	0	0	0	0	0	0	0	0	0	0	0	0
363	GATAAACGCTGGCGGCGTGCATAACACATGCAAGTCGAACGATGAAACTTAGATGATTTCTTCGGAATGAACTTAAGTGGATTAGTGGCGAACGGGTGAGTAACACGTGAGTAACCTGCCTTACACAAGGGGATAGCCTTTGGAAACGAAGAATAATACCCTATAAAGTCGATTTATCGCATGATAGAATGACCAAAGATTTATCGGTGTAAGATGGACTTGCGTCTGATTAGCTAGTTGGTGAGATAAAGGCCCACCAAGGCAACGATCAGTAGCCGGCTTGAGAGAGTGTACGGCCACATTGGGACTGAGACACGGCCCAA	0	0	0	0	0	0	0	0	0	0	0	0	0	0	0	0	0	0	0	0	0	0	0	0	0	0	0	0	0	0	0	0	0	0	0	0	0	54	0	0	0	0	0	0	0	0	0	0
364	GACGAACGCTGGCGGTGTGCTTCACACATGCAAGTCGAACGGGGTAGCAATACCTAGTGGCGGACGGGTGAGTAACGCGTGGGAATCTGCCCAAGGGTGGGGGATAACTAACCGAAAGGTTAGCTAATACCGCATATGCCGTGAGGTAAAAGGAGTAATCCGCCTTTGGATGAGCCTGCGTCCGATTAGCTTGTTGGTGGGGTAAAAGCCTACCAAGGCTACGATCGGTAGCTGGTCTGAGAGGATGATCAGCCACAATGGGACTGAGACACGGCCCAT	0	0	0	0	0	0	0	19	0	126	0	0	0	270	0	138	0	0	0	0	0	0	0	0	0	0	0	42	0	0	0	49	0	0	0	0	0	0	0	0	22	0	0	0	0	66	0	0
365	GACGAACGCTGGCGGCATGCCTAATACATGCAAATCGAACGAAGCCTTTTAGGCTTAGTGGTGAACGGGTGAGTAACACGTATCCAATCTACCCTTAAGTTGGGGATAACTAGTCGAAAGATTAGCTAATACCGAATAATAACATCAATATCGCATGAGAAGATGTAGAAAGTCGCTCTTTGTGGCGACGCTTTTGGATGAGGGTGCGACGTATCAGATAGTTGGTGAGGTAATGGCTCACCAAGTCAATGACGCGTAGCTGTACTGAGAGGTAGAACAGCCACAATGGGACTGAGACACGGCCCAT	0	0	0	0	0	0	0	0	0	0	0	0	0	0	0	0	0	0	0	0	0	0	0	0	92	0	0	0	0	0	0	0	0	0	0	0	0	0	0	0	0	0	0	0	0	0	0	0
366	GACGAACGCTGGCGGCGTGCCTAATACATGCAAGTAGAACGCTGAAGAGAGGAGCTTGCTCTTCTTGGATGAGTTGCGAACGGGTGAGTAACGCGTAGGTAACCTGCCTTGTAGCGGGGGATAACTATTGGAAACGATAGCTAATACCGCATAACAATGGATGACCCATGTCATTTATTTGAAAGGGGCAAATGCTCCACTACAAGATGGACCTGCGTTGTATTAGCTAGTAGGTGAGGTAACGGCTCACCTAGGCGACGATACATAGCCGACCTGAGAGGGTGATCGGCCACACTGGGACTGAGACACGGCCCAG	0	0	0	0	0	0	0	0	0	0	0	0	0	0	0	0	0	0	0	57	0	0	0	0	0	0	0	0	0	0	0	0	0	0	0	8	0	0	0	0	0	0	0	0	0	0	0	0
367	GACGAACGCTGGCGGCGTGCTTAACACATGCAAGTCGAACGGGATTTAGTAAACAGAAGCTTCGGTGGAAGATTACTAATGAGAGTGGCGAACGGGTGAGTAACGCGTGAGCAACCTGCCTATGACAGTGGGATAGCCTCGGGAAACCGGGATTAATACCGCATAAAATCGTAGAAACACATGTTTTAACGGTCAAAGATTTATCGGTCATAGATGGGCTCGCGTCTGATTAGCTAGTTGGTGAGATAACAGCCCACCAAGGCGACGATCAGTAGCCGGTCTGAGAGGATGAACGGCCACATTGGAACTGAGACACGGTCCAA	0	0	0	0	0	0	0	0	0	0	0	0	0	0	0	0	0	0	0	0	0	0	66	0	0	0	0	0	0	0	0	0	0	0	0	0	0	0	0	0	0	0	0	0	0	0	0	0
368	ATTGAACGCTGGCGGCAGGCTTAACACATGCAAGTCGAGCGGGGGAGGTTGCTTCGGTAACTGACCTAGCGGCGGACGGGTGAGTAATACTTAGGAATCTGCCTATTAATGGGGGACAACATCTCGAAAGGGATGCTAATACCGCATACGCCCTACGGGGGAAAGCAGGGGATCACTTGTGACCTTGCGTTAATAGATGAGCCTAAGTCGGATTAGCTAGTTGGTGGGGTAAAGGCCTACCAAGGCGACGATCTGTAGCGGGTCTGAGAGGATGATCCGCCACACTGGGACTGAGACACGGCCCAG	0	232	0	0	0	0	0	0	0	0	0	0	0	0	0	0	0	0	0	0	0	35	0	0	0	0	0	0	0	0	0	0	0	0	0	0	0	0	0	0	0	0	0	0	0	0	0	0
369	GATGAACGCCGGCGGTGTGCCTAATACATGCAAGTCGAGCGCATTGGCCCAACTGATATGACGTGCTTGCACTGAATTGATGTTGGATTACCAGTGAGCGGCGGACGGGTGAGTAACACGTGGGCAACCTGCCCTGAAGCGGGGGATAACATCTGGAAACAGGTGCTAATACCGCATAACAACGAAAACCACATGGTTTTCGTTTCAAAGATGGTTTCGGCTATCACTTCAGGATGGGCCCGCGGTGCATTAGCTAGTTGGTAAGGTAACGGCTTACCAAGGCAATGATGCATAGCCGAGTTGAGAGACTGATCGGCCACAATGGAACTGAGACACGGTCCAT	0	0	0	0	0	0	0	0	0	0	0	0	0	0	0	0	0	0	0	0	0	0	0	0	0	0	0	0	0	0	0	0	0	0	0	0	0	0	0	0	0	0	0	0	0	0	0	0
370	GATGAACGCTGGCGGCGTGCTTAACACATGCAAGTCGAACGAAGCACTTTATTTGATTTCCTTCGGGACTGATTATTTTGTGACTGAGTGGCGGACGGGTGAGTAACGCGTGGGTAACCTGCCTTGTACAGGGGGATAACAGTTGGAAACGGCTGCTAATACCGCATAAGCGCACGGCATCGCATGATGCAGTGTGAAAAACTCCGGTGGTATAAGATGGACCCGCGTTGGATTAGCTAGTTGGTGAGGTAACGGCCCACCAAGGCGACGATCCATAGCCGACCTGAGAGGGTGACCGGCCACATTGGGACTGAGACACGGCCCAA	0	0	0	0	0	0	0	0	0	0	0	0	0	0	0	0	0	0	0	106	0	0	0	0	0	66	0	1213	0	0	0	0	0	0	0	0	0	0	0	0	0	0	0	0	0	0	0	0
371	ATTGAACGCTGGCGGCATGCCTTACACATGCAAGTCGAACGGTAACGGGCCTTCGGGTGCCGACGAGTGGCGAACGGGTGAGTAATACATCGGAACGTGCCCGAGAGTGGGGGATAACGAGGCGAAAGCTTTGCTAATACCGCATACGATCTCAGGATGAAAGCAGGGGACCTTCGGGCCTTGCGCTCACGGAGCGGCCGATGGCAGATTAGGTAGTTGGTGGGATAAGAGCTTACCAAGCCTGCGATCTGTAGCTGGTCTGAGAGGATGATCAGCCACACTGGGACTGAGACACGGCCCAG	0	0	0	0	0	0	0	0	0	0	0	0	0	0	0	0	0	0	0	0	0	0	0	0	0	0	0	0	0	0	0	0	0	0	0	3	0	0	0	0	0	0	0	0	0	0	0	0
372	AGTGAACGCTGGCGGTAGGCCTAACACATGCAAGTCGAACGGCAGCACAGTAAGAGCTTGCTCTTATGGGTGGCGAGTGGCGGACGGGTGAGGAATACATCGGAATCTACCTTTTCGTGGGGGATAACGTAGGGAAACTTACGCTAATACCGCATACGACCTTCGGGTGAAAGCAGGGGACCTTCGGGCCTTGCGCGGATAGATGAGCCGATGTCGGATTAGCTAGTTGGCGGGGTAAAGGCCCACCAAGGCGACGATCCGTAGCTGGTCTGAGAGGATGATCAGCCACACTGGAACTGAGACACGGTCCAG	0	0	0	0	0	0	0	0	0	0	0	0	0	0	0	0	0	0	0	69	0	0	0	0	0	0	0	0	0	0	0	0	0	0	0	0	0	0	0	0	0	0	0	0	0	0	0	0
373	GATGAACGCTGGCGGCGCGCCTAACACATGCAAGTCGAACGATTAAAGCATCTTTTAGATGTGTATAAAGTGGCGAACGGCTGAGTAACACGTGGGCAACCTGCCCTTTTCTTTGGGATAGCTACGGGAAACCGTGGGTAATACCGAATATTTCTTGAGTGTCGCATGGCACACAAGACAAAGCGTCTAGCGGAAAAGGATGGGCCCGCGGCCTGTTAGCTTGTTGGTGGGGTAATGGCCTACCAAGGCAGTTATGGGTAGCCGGGTTGAGAGACCGACCGGCCAGATTGGGACTGAGACACGGCCCAG	0	0	0	0	0	0	0	0	0	0	0	0	0	0	0	0	0	0	0	0	0	0	0	0	0	0	0	0	0	0	0	0	0	0	0	0	0	0	0	65	0	0	33	0	0	0	0	0
374	GACGAACGCTGGCGGCGCGCCTAACACATGCAAGTCGAGCGATGAAAGTTGTTCAGATCCTTCGGGTGACGAACTTCTGGATTAGCGGCGAACGGGTGAGTAACGCGTGAGGAACCTGCCTCTCACAACGGGATAGCCTCGGGAAACCGGGATTAATACCGTATGACACTATCAGATGGCATCATCAGGTAGTTAAAGTGCTAGCGGTGAGAGATGGCCTCGCGTCTGATTAGTTAGTTGGTGGGGTAACGGCCTACCAAGACGACGATCAGTAACCGGCCTGAGAGGGTGAACGGTCACATTGGAACTGAGACACGGTCCAA	0	0	0	0	3	0	0	0	0	0	0	0	0	0	0	0	0	0	0	0	0	0	0	0	0	0	0	0	0	0	0	0	0	0	0	0	0	0	0	0	0	0	0	0	0	0	0	0
375	GATGAACGCCGGCGGTGTGCCTAATACATGCAAGTCGAGCGCATTGGCCCAACTGATATGACGTGCTTGCACTGAATTGACGTTGGATTACCAGTGAGCGGCGGACGGGTGAGTAACACGTGGGCAACCTACCCTGAAGTGGGGGATAACATCTGGAAACAGGTGCTAATACCGCATAACAACGAAAACCACATGGTTTTCGTTTCAAAGATGGTTTCGGCTATCACTTTAGGATGGGCCCGCGGTGCATTAGCTAGTTGGTAAGGTAACGGCTTACCAAGGCAATGATGCATAGCCGAGTTGAGAGACTGATCGGCCACAATGGAACTGAGACACGGTCCAT	0	0	0	0	0	0	0	0	0	0	0	0	0	0	0	0	0	0	0	0	0	0	0	0	0	0	0	0	0	0	0	0	0	0	0	0	0	0	0	0	0	0	0	0	0	0	0	0
376	ATTGAACGCTGGCGGCATGCCTTACACATGCAAGTCGGACGGCAGCGCGGGCTTCGGCCTGGCGGCGAGTGGCGAACGGGTGAGTAATACATCGGAACGTATCCTGGAGTGGGGGATAGCCCGGCGAAAGCCGGATTAATACCGCATACGCTCTGAGGAGGAAAGCGGGGGACCTTCGGGCCTCGCGCTCAAGGGGCGGCCGATGGCGGATTAGGTAGTTGGTGGGGTAAAGGCCTACCAAGCCGACGATCCGTAGCTGGTCTGAGAGGACGACCAGCCACACTGGGACTGAGACACGGCCCAG	0	0	0	0	0	0	0	0	0	0	0	0	0	0	0	0	0	0	0	0	0	0	0	0	0	0	0	0	0	0	0	0	0	0	0	0	0	0	8	0	0	0	0	0	0	0	56	0
377	GATGAACGCTGGCGGCGTGCTTAACACATGCAAGTCGAACGGAAAGGCCGAAGCTTGCTTCGGTACTCGAGTGGCGAACGGGTGAGTAACACGTGGGTGATCTGCCCTGTACTTCGGGATAAGCTTGGGAAACTGGGTCTAATACCGGATATGACAATCTCTTGGATGGGGTTGTGGAAAGCTTTTGCGGTATGGGATGAGCTCGCGGCCTATCAGCTTGTTGGTGGGGTAATGGCCTACCAAGGCGTCGACGGGTAGCCGGCCTGAGAGGGTGTACGGCCACATTGGGACTGAGATACGGCCCAG	0	0	0	0	0	0	0	0	0	0	0	0	0	0	0	0	0	0	0	0	0	0	0	0	0	0	0	0	0	0	399	0	0	0	0	0	0	0	0	0	0	0	0	0	0	0	0	0
378	GGTGAATGCTGGCGGTATGGATAAGGCATGCAAGTCAAGGGGCCGCAAGGCACCGGCAGACGAGGTAGTAATAGGTAGGAACGTACCCGGAAGTCGTGCACAGCTCGTCGAAAGACGGGGTAATTCACGATATTGTCGCAAGATGAAAGATTTATCGCTTCCGGAGCGGCCTGCTGTGTATCAGCTAGTTGGTAAGGTAACGGCTTACCAAGGCTATGACGCATAGGGGAGCTGAGAGGCTGACCCCCACCGATCGGACTGAGACACGGCCGAT	0	0	0	0	0	0	0	0	0	0	0	0	0	0	0	0	0	0	0	0	0	0	0	0	0	0	0	0	0	0	0	0	0	0	0	0	0	0	0	0	0	0	0	0	0	0	0	0
379	GACGAACGCTGGCGGCGTGCCTAATACATGCAAGTCGAGCGAGTCTGCCTTGAAGATCGGAGTGCTTGCACTCTGTGAAACAAGATACAGGCTAGCGGCGGACGGGTGAGTAACACGTGGGTAACCTGCCCAAGAGATCGGGATAACACCTGGAAACAGATGCTAATACCGGATAACAACAGATGATGCCTATCAACTGTTTAAAAGATGGTTCTGCTATCACTCTTGGATGGACCTGCGGTGCATTAGCTAGTTGGTAGGGTAACGGCCTACCAAGGCAATGATGCATAGCCGAGTTGAGAGACTGATCGGCCACATTGGGACTGAGACACGGCCCAA	0	0	0	0	0	0	0	0	0	0	0	0	0	0	0	0	0	0	0	0	0	0	0	0	0	0	0	0	0	0	0	0	0	0	0	0	0	0	0	0	0	0	0	0	0	0	0	0
380	GACGAACGCTGGCGGCGTGCCTAACACATGCAAGTCGAGCGATGAAACCTTAACAGATTCCTTCGGGATGAAGACTAGGTGGATTAGCGGCGGACGGGTGAGTAACACGTGAGTAACCTGCCTTTGACACAGGGATAGCCATGGGAAACCGTGATTAATACCAGATGAAATCTAAACTACACATGTAGCAAAGATCAAAGCGAATAAGCGGTCAGAGATGGACTCGCGTCTGATTAGCTAGTTGGTGAGATAAAAGCTCACCAAGGCGACGATCAGTAGCCGGCCTGAGAGGGTGAACGGCCACATTGGAACTGAGACACGGTCCAA	0	0	0	0	0	0	0	0	0	0	0	0	0	0	0	1666	0	0	0	0	0	0	0	0	0	0	0	0	0	0	0	0	0	0	0	0	0	0	0	0	0	0	0	0	0	0	0	0
381	GACGAACGCTGGCGGCGTGCCTAATACATGCAAGTCGAGCGAACAGAAGCAGCAGAATTACTTCGGTAAGGACGCTGTGGAAGTTAGCGGCGGATGGGTGAGTAACACGTGGGTAACCTACCCTTAAGACTGGGATACCACTTGGAAACAGGTGCTAATACCGGATAGGAGTATGAGCTGCATGGCTTATACTTTAAAGGCGGCGAAAGCTGTCACTAAAGGATGGACCCGCGGTGCATTAGCTAGTTGGTAAGGTAACGGCTTACCAAGGCGACGATGCATAGCCGAGTTGAGAGACTGATCGGCCACATTGGGACTGAGACACGGCCCAA	0	0	0	0	4	0	0	0	0	0	0	0	0	0	0	0	0	0	0	0	0	0	0	0	0	0	0	0	0	0	0	0	0	0	0	0	0	0	0	0	0	0	0	0	0	0	0	0
382	GACGAACGCTGGCGGCGTGCTTAACACATGCAAGTCGAACGGGATTTAGTAAACAGAAGCCTCGGCGGAAGATTACTAATGAGAGTGGCGAACGGGTGAGTAACGCGTGAGCAACCTGCCTATGACAGTGGGATAGCCTCGGGAAACCGGGATTAATACCGCATAAAATCGTAGAAACACATGTTTTAACGGTCAAAGATTTATCGGTCATAGATGGGCTCGCGTCTGATTAGCTAGTTGGTGAGATAACAGCCCACCAAGGCGACGATCAGTAGCCGGTCTGAGAGGATGAACGGCCACATTGGAACTGAGACACGGTCCAA	0	0	0	0	0	0	0	0	0	0	0	0	0	0	0	0	0	0	0	0	0	0	0	0	0	0	0	0	0	0	0	0	0	0	0	0	0	0	0	0	0	0	0	0	0	0	0	0
383	ATTGAACGCTGGCGGCAGGCCTAACACATGCAAGTCGAGCGGATGAGAAGAGCTTGCTCTTCGATTCAGCGGCGGACGGGTGAGTAATGCCTAGGAATCTGCCTGGTAGTGGGGGACAACGTTTCGAAAGGAACGCTAATACCGCATACGTCCTACGGGAGAAAGCAGGGGACCTTCGGGCCTTGCGCTATCAGATGAGCCTAGGTCGGATTAGCTAGTTGGTGAGGTAATGGCTCACCAAGGCGACGATCCGTAACTGGTCTGAGAGGATGATCAGTCACACTGGAACTGAGACACGGTCCAG	0	0	0	0	0	0	0	0	0	0	0	0	0	0	0	0	0	0	0	0	0	0	0	0	0	0	0	0	0	0	0	0	0	0	0	38	0	0	0	0	0	0	0	0	0	0	28	0
384	GATGAACGCTAGCTACAGGCTTAACACATGCAAGTCGCAGGGTAACGTGAGGGAAGCTTGCTTCCCTTGACGACGACTGGCGCACGGGTGAGTAACGCGTATCCAACCTTCCCATGACCACGGGATAACCCGTTGAAAGACGGACTAATACCGTATGACGTCGTTTGCTGACATCAAATAACGATTAAAGGTTTGGCGGTGATGGATGGGGATGCGTCTGATTAGCTTGTTGGCGGGGTAACGGCCCACCAAGGCGACGATCAGTAGGGGTTCTGAGAGGAAGGTCCCCCACATTGGAACTGAGACACGGTCCAA	0	0	0	0	0	0	0	0	0	0	0	0	0	0	0	0	0	0	0	0	0	0	0	0	0	0	31	531	0	0	0	0	0	0	0	0	66	0	0	0	0	0	0	0	0	0	0	0
385	GATGAACGCTAGCGGCAGGCTTAACACATGCAAGTCGAGGGGCAGCATAATGGATAGCAATATCTATGGTGGCGACCGGCGCACGGGTGCGTAACGCGTATGCAACCTACCTTTAACAGGGGGATAACACTGAGAAATTGGTACTAATACCCCATAATATCATAGAAGGCATCTTTTATGGTTGAAAATTCCGATGGTTAGAGATGGGCATGCGTTGTATTAGCTAGTTGGTGGGGTAACGGCTCACCAAGGCGACGATACATAGGGGGACTGAGAGGTTAACCCCCCACACTGGTACTGAGACACGGACCAG	0	0	0	0	0	0	0	0	0	0	0	0	0	0	0	0	0	0	0	47	0	0	0	0	0	0	0	0	0	0	0	0	0	0	0	11	0	0	0	0	0	0	0	0	0	0	0	0
386	GATAAACGCTGGCGGCGTGCATAACACATGCAAGTCGAACGATGAAACTTAGATGATTTCTTCGGAATGAACTTAAGTGGATTAGTGGCGAACGGGTGAGTAACACGTGAGTAACCTGCCTTACACAAGGGGATAGCCTCTGGAAACGGAGAATAATACCCTATAAAGTCTAATCAGCACATGCTGGAAAGACCAAAGATTTATCGGTGTAAGATGGACTTGCGTCTGATTAGCTAGTTGGTGAGATAAAAGCTCACCAAGGCGACGATCAGTAGCCGGCTTGAGAGAGTGTACGGCCACATTGGGACTGAGACACGGCCCAA	0	0	0	0	0	0	0	0	0	0	0	0	0	0	0	0	0	0	0	0	0	0	16	0	0	0	0	0	0	0	0	0	0	0	0	0	0	0	0	0	0	0	0	0	0	0	0	0
387	GATGAACGCTGGCGGCGTGCCTAATACATGCAAGTCGAGCGAACAGATAAGGAGCTTGCTCCTTTGACGTTAGCGGCGGACGGGTGAGTAACACGTGGGTAACCTACCTATAAGACTGGGATAACTTCGGGAAACCGGAGCTAATACCGGATAACATTTGGAACCGCATGGTTCTAAAGTGAAAGATGGTTTTGCTATCACTTATAGATGGACCCGCGCCGTATTAGCTAGTTGGTAAGGTAACGGCTTACCAAGGCAACGATACGTAGCCGACCTGAGAGGGTGATCGGCCACACTGGAACTGAGACACGGTCCAG	0	0	0	0	0	0	0	0	0	0	0	0	0	0	0	0	0	0	0	0	0	0	0	0	0	0	0	0	0	0	0	0	0	0	0	0	0	0	0	0	0	0	0	0	0	0	0	0
388	ATTGAACGCTGGCGGCATGCTTTACACATGCAAGTCGAACGGCAGCACAGGGAGCTTGCTCCTGGGTGGCGAGTGGCGCACGGGTGAGTAATACATCGGAACGTGTCCTATCGTGGGGGATAACTGATCGAAAGATCAGCTAATACCGCATAAGACCTGAGGGTGAAAGTGGGGGATCGCAAGACCTCACGCGATTGGAGCGGCCGATGCCCGATTAGCTAGTTGGTGAGGTAAAGGCTCACCAAGGCGACGATCGGTAGCTGGTCTGAGAGGACGACCAGCCACACTGGGACTGAGACACGGCCCAG	0	0	0	0	0	0	0	0	0	0	0	0	0	0	0	0	0	0	0	0	0	0	0	0	0	0	0	0	0	0	0	0	0	0	0	0	0	0	0	0	0	0	2	0	0	0	0	0
389	GATGAACGCTGGCGGCGCGCCTAACACATGCAAGTCGAACGGTTAACGCATCTTCGGATGTGTATAAAGTGGCGAACGGCTGAGTAACACGTGGGCAACCTGCCCTTTGCACTGGGATAGCCTCGGGAAACCGAGGTTAATACCGGATACTCCATATTTGTCGCATGGCGAATATGGGAAAGCTCCGGCGGCAAAGGATGGGCCCGCGGCCTGTTAGCTAGTTGGTGGGGTAGTGGCCTACCAAGGCAATGATGGGTAGCCGGGTTGAGAGACCGACCGGCCAGATTGGGACTGAGACACGGCCCAG	0	0	0	0	0	0	0	0	0	0	0	0	0	0	0	0	0	0	0	0	0	0	0	0	0	0	0	0	0	0	0	0	0	0	0	0	0	0	0	0	0	0	0	0	0	0	0	0
390	GACGAACGCTGGCGGCGTGCTTAACACATGCAAGTCGAGCGGAAAGGCCCTTTCGGGGGTACTCGAGCGGCGAACGGGTGAGTAACACGTGAGTAATCTGCCCTTGGCTTCGGGATAGCCACCGGAAACGGTGATTAATACCGGATACGACACATCACTGCATGGTGCGTGTGTGGAAAGTTTTTTCGGCCAGGGATGTGCTCGCGGCCTATCAGCTTGTTGGTGGGGTAATGGCCTACCAAGGCTTCGACGGGTAGCCGGCCTGAGAGGGTGACCGGCCACACTGGGACTGAGACACGGCCCAG	0	0	0	0	0	0	0	0	0	0	0	0	0	0	0	0	0	0	0	0	0	0	0	0	0	0	0	0	0	0	0	0	0	0	0	0	0	0	0	0	0	0	0	0	0	0	0	0
391	GATGAACGCTAGCGATAGGCTTAACACATGCAAGTCGAGGGGCAGCGAGATGTAGCAATACGTCGTCGGCGACCGGCGAATGGGTGAGTAACACGTATGCAACTTACCTCTTAGTGGTGAATAACTCGATGAAAGTCGGACTAATACACCATACTCTCCTTAGATCACATGAGAAGAGGAGGAAAGATTAATCGCTAAGAGATAGGCCTGCGTTCCATTAGCTAGTTGGTAAGGTAACGGCTTACCAAGGCAACGATGGATAGGGGGACTGAGAGGTTGACCCCCCACATTGACACTGAGATACGGGTCAA	0	0	0	0	0	0	0	0	0	0	0	0	0	0	0	0	0	0	10	0	0	0	29	0	0	0	0	0	0	0	0	0	0	0	0	0	0	0	0	0	0	0	0	0	0	0	0	0
392	GACGAACGCTGGCGGCGTGCCTAATACATGCAAGTAGAACGCTGAAGCTTGGTGCTTGCACCGAGCGGATGAGTTGCGAACGGGTGAGTAACGCGTAGGTAACCTGCCTGGTAGCGGGGGATAACTATTGGAAACGATAGCTAATACCGCATAAAATGGATTATCGCATGATAATTCATTGAAAGGTGCAAATGCATCACTACCAGATGGACCTGCGTTGTATTAGCTAGTTGGTGGGGTAACGGCTCACCAAGGCAACGATACATAGCCGACCTGAGAGGGTGATCGGCCACACTGGGACTGAGACACGGCCCAG	0	0	0	0	0	0	0	0	0	0	0	0	0	0	0	0	0	0	0	0	0	0	0	0	0	0	0	0	0	0	0	0	0	0	0	0	0	0	0	0	0	0	0	0	0	1543	0	0
393	ATTGAACGCTGGCGGCGTGCTTTACACATGCAAGTCGAACGGCAGCACGGGTGCTTGCACCTGGTGGCGAGTGGCGAACGGGTGAGTAATACATCGGAACATGCCTATTAGAGTGGGATAACTAATCGAAAGATTAGCTAATACCGCATAATCTCTGAGGAGGAAAGCTGGGGACCAGAAATGGCCTGGCGCTGATAGAGTGGCCGATGGTCGATTAGCTAGTTGGTGGGGTAAGAGCTTACCAAGGCGATGATCGATAGCTGTTCTGAGAGGAAGATCAGCCACACTGGGACTGAGACACGGCCCAG	0	0	0	0	0	0	0	0	0	0	0	0	0	0	0	0	0	0	0	0	0	0	0	0	0	0	0	0	0	0	0	0	0	0	0	0	0	0	0	0	0	0	0	0	0	0	0	0
394	GACGAACGCTGGCGGCGTGCCTAATACATGCAAGTCGAGCGCATCATTTCGGTGATGAGCGGCGAACGGGTGAGTAACGCGTGGGGAATCTGCCTTGAAGCGGGGGACAACTATTGGAAACGATAGCTAATACCGCATAATAGGAAGGGTGACATCACCTTTTCTTGAAAGTATCTATTGGTACACTTCAAGATGATCCCGCGTTGGATTAGCTAGTTGGTAAGGTAAGGGCTTACCAAGGCGATGATCCATAGCCGACCTGAGAGGGTGATCGGCCACATTGGGACTGAGACACGGCCCAA	0	0	0	0	0	0	0	0	0	0	0	0	0	0	0	0	0	0	0	0	0	0	0	0	0	0	0	0	0	0	0	0	0	0	0	0	0	0	0	0	34	0	0	0	0	0	0	0
395	GACGAACGCTGGCGGCGTGCCTAATACATGCAAGTAGAACGCTGAAGAGAGGAGCTTGCTCTTCTTGGATGAGTTGCGAACGGGTGAGTAACGCGTAGGTAACCTGCCTTGTAGCGGGGGATAACTATTGGAAACGATAGCTAATACCGCATAACAATGGATGACACATGTCATTTATTTGAAAGGGGCAATTGTTCCACTACAAGATGGACCTGCGTTGTATTAGCTAGTAGGTGAGGTAATGGCTCACCTAGGCGACGATACATAGCCGACCTGAGAGGGTGATCGGCCACACTGGGACTGAGACACGGCCCAG	0	0	0	0	0	0	0	0	0	0	0	0	0	0	0	0	0	0	0	0	0	0	0	0	0	0	0	0	0	0	0	0	0	0	0	0	0	0	0	0	0	0	0	0	0	0	0	0
396	GACGAACGCTGGCGGCGTGCCTAATACATGCAAGTCGAACGAAGCTTTCTTTCACCGAATGCTTGCATTCACCGAAAGAAGCTTAGTGGCGAACGGGTGAGTAACACGTAGGCAACCTGCCCAAAAGAGGGGGATAACACTTGGAAACAGGTGCTAATACCGCATAACCATGAACACCGCATGATGTTCATGTAAAAGACGGCTTTTGCTGTTACTTTTGGATGGGCCTGCGGCGTATTAACTTGTTGGTGGGGTAACGGCCTACCAAGGTGATGATACGTAGCCGAACTGAGAGGTTGATCGGCCACATTGGGACTGAGACACGGCCCAA	0	0	0	0	0	0	0	0	0	0	0	0	0	0	0	1597	0	0	0	0	0	0	0	0	0	0	0	0	0	0	0	0	0	0	0	0	0	0	0	0	0	0	0	0	0	0	0	0
397	ATTGAACGCTGGCGGCAGGCTTAACACATGCAAGTCGAGCGGAGATGAGGTGCTTGCACCTTATCTTAGCGGCGGACGGGTGAGTAATGCTTAGGAATCTGCCTATTAGTGGGGGACAACATTCCGAAAGGGATGCTAATACCGCATACGTCCTACGGGAGAAAGCAGGGGATCTTCGGACCTTGCGCTAATAGATGAGCCTAAGTCGGATTAGCTAGTTGGTGGGGTAAAGGCCTACCAAGGCGACGATCTGTAGCGGGTCTGAGAGGATGATCCGCCACACTGGGACTGAGACACGGCCCAG	0	0	0	0	0	0	0	0	28	930	0	0	0	0	0	0	0	0	0	0	0	0	0	0	0	0	118	0	0	0	0	0	0	0	0	0	0	0	0	0	0	0	0	0	0	0	0	0
398	ATTGAACGCTGGCGGCATGCCTTACACATGCAAGTCGAACGGCAGCGCGGGAGCAATCCTGGCGGCGAGTGGCGAACGGGTGAGTAATACATCGGAACGTGCCCAATCGTGGGGGATAACGCAGCGAAAGCTGTGCTAATACCGCATACGATCTACGGATGAAAGCAGGGGATCGCAAGACCTTGCGCGAATGGAGCGGCCGATGGCAGATTAGGTAGTTGGTGAGGTAAAGGCTCACCAAGCCTTCGATCTGTAGCTGGTCTGAGAGGACGACCAGCCACACTGGGACTGAGACACGGCCCAG	0	0	0	0	0	0	0	0	0	0	0	0	0	0	0	0	0	0	0	0	0	0	0	0	0	0	0	0	0	0	0	0	0	0	0	0	0	0	0	0	0	0	0	0	0	0	0	0
399	GACGAACGCTGGCGGCGTGCCTAATACATGCAAGTCGAACGAGAGCGACCGGTGCTTGCACTGGTCAATCTAGTGGCGAACGGGTGAGTAACACGTGGGTAACCTGCCCATCAGAGGGGGATAACATTCGGAAACGGATGCTAAAACCGCATAGGTTCTACAGTCTCATGACTGAAGAAGGAAAAGAGGCTTCGGCTTCTGCTGATGGATGGACCCGCGGTGCATTAGCTAGTTGGTGAGGTAACGGCTCACCAAGGCCGTGATGCATAGCCGACCTGAGAGGGTGATCGGCCACATTGGGACTGAGACACGGCCCAA	0	0	0	0	0	0	0	0	0	0	0	0	0	0	0	0	0	0	0	0	0	0	0	0	0	0	0	8	0	0	0	0	0	0	0	0	0	0	0	0	0	0	0	0	0	0	0	0
400	ATTGAACGCTGGCGGCATGCCTTACACATGCAAGTCGAACGGCAGCACGGACTTCGGTCTGGTGGCGAGTGGCGAACGGGTGAGTAATACATCGGAACGTGCCCTGTCGTGGGGGATAACTAGTCGAAAGATTAGCTAATACCGCATACGACCTGAGGGTGAAAGCGGGGGACCGTAAGGCCTCGCGCGATAGGAGCGGCCGATGTCTGATTAGCTAGTTGGTGGGGTAAAGGCCCACCAAGGCGACGATCAGTAGCTGGTCTGAGAGGACGATCAGCCACACTGGGACTGAGACACGGCCCAG	0	0	0	0	0	0	0	0	0	0	0	0	0	0	0	0	0	0	0	0	0	0	0	0	0	0	0	0	0	0	0	0	0	0	0	0	0	0	0	0	0	0	0	0	0	0	12	0
401	GACGAACGCTGGCGGCGTGCTTAACACATGCAAGTCGAACGATGAAGCTGTGCTTGCACAGTGGATTAGTGGCGAACGGGTGAGTAACACGTGAGTAACCTGCCCTCCACTTTGGGATAACTCCGAGAAATCGGGGCTAATACTGGATATGACCTTGGCCCGCATGGGTTGTGGTGGAAAGTTTTTCGGTGGGGGATGGGCTCGCGGCCTATCAGTTTGTTGGTGAGGTAGTGGCTCACCAAGGCGATGACGGGTAGCCGGCCTGAGAGGGCGACCGGCCACACTGGGACTGAGACACGGCCCAG	0	0	0	0	0	0	0	0	0	0	0	0	0	0	0	0	0	0	0	0	0	0	0	0	0	0	0	0	0	0	0	0	0	0	0	0	0	176	0	0	0	0	0	0	0	0	0	0
402	ATTGAACGCTGGCGGCATGCCTTACACATGCAAGTCGAACGGCAGCACGGGAGCAATCCTGGTGGCGAGTGGCGAACGGGTGAGTAATACATCGGAACGTGCCCTGTCGTGGGGGATAACTAGTCGAAAGATTAGCTAATACCGCATACGACCTGAGGGTGAAAGCGGGGGACCGTAAGGCCTCGCGCGATAGGAGCGGCCGATGTCTGATTAGCTAGTTGGTGGGGTAAAGGCCCACCAAGGCGACGATCAGTAGCTGGTCTGAGAGGACGATCAGCCACACTGGGACTGAGACACGGCCCAG	0	0	0	0	0	0	0	0	0	0	0	0	0	0	466	0	0	0	0	0	0	33	0	0	0	0	0	577	0	0	0	0	0	109	0	0	0	0	0	0	0	0	0	0	0	0	0	0
403	GACGAACGCTGGCGGCGTGCTTAACACATGCAAGTCGAACGATGAAGCTGTGCTTGCACAGTGGATTAGTGGCGAACGGGTGAGTAACACGTGAGTAACCTGCCCTCCACTTTGGGATAACTCCGAGAAATCGGGGCTAATACTGGATATGACTATGGCCCGCATGGGTTGTGGTGGAAAGTTTTTCGGTGGGGGATGGGCTCGCGGCCTATCAGTTTGTTGGTGAGGTAGTGGCTCACCAAGGCGATGACGGGTAGCCGGCCTGAGAGGGCGACCGGCCACACTGGGACTGAGACACGGCCCAG	0	0	0	0	0	0	0	0	0	0	0	0	0	0	0	0	0	0	0	0	0	83	16	0	5	0	0	0	0	0	0	0	0	0	0	0	0	0	0	0	0	0	0	5	0	0	102	0
404	GACGAACGCTGGCGGCGTGCTTAACACATGCAAGTCGAACGGAAAGGCCCCCTTGTGGGGTACTCGAGTGGCGAACGGGTGAGTAACACGTGAGTAACCTACCCTTGACTTTGGGATAACTTCAGGAAACTGGGGCTAATACCGGATAGGAGCTCCTGCTGCATGGTGGGGGTTGGAAAGTTTCGGCGGTTGGGGATGGACTCGCGGCTTATCAGCTTGTTGGTGGGGTAGTGGCTCACCAAGGCTTTGACGGGTAGCCGGCCTGAGAGGGTGACCGGCCACATTGGGACTGAGATACGGCCCAG	0	0	0	0	0	0	0	0	0	0	0	0	0	0	0	0	114	0	0	0	0	0	0	0	0	0	0	0	0	0	0	0	0	0	230	0	0	0	0	0	0	0	0	0	0	0	0	0
405	ATTGAACGCTGGCGGCATGCCTTACACATGCAAGTCGAACGGCAGCGCGGGAGCAATCCTGGCGGCGAGTGGCGAACGGGTGAGTAATATATCGGAACGTGCCCATTAGTGGGGGATAGCCCGGCGAAAGCCGGATTAATACCGCATACGACCTGAGGGTGAAAGCGGGGGATCGCAAGACCTCGCGCTATTGGAGCGGCCGATATCAGATTAGCTAGTTGGTGGGGTAAAAGCCTACCAAGGCAACGATCTGTAGTTGGTCTGAGAGGACGACCAGCCACACTGGGACTGAGACACGGCCCAG	0	0	0	0	0	0	0	0	0	0	0	0	0	0	0	0	0	0	0	0	0	0	0	0	0	0	0	0	0	0	0	0	0	0	0	0	0	0	0	0	0	0	0	0	0	0	0	0
406	GATTAACGCTGGCGGCGTGCATAACACATGCAAGTCGAACGATGAAACTTAAATGATTTCTTCGGAATGAACTTAAGTGGATTAGTGGCGGACGGGTGAGTAACGCGTGAGTAACCTGCCTTACACAAGGGGATAGCCGTTGGAAACGACGAATAATACCCTATGAAACTATCACTTCGCATGAAGCGATAGTCAAAGTGTTAGCGGTGTAAGATGGACTTGCGTCTGATTAGCTAGTTGGTGAGAAAAAAGCCCACCAAGGCAACGATCAGTAGCCGGCTTGAGAGAGTGTACGGCCACATTGGGACTGAGACACGGCCCAG	0	0	0	0	0	0	5	0	0	0	0	0	0	0	0	0	0	0	0	0	0	35	20	0	0	0	0	0	0	0	0	0	0	0	0	0	50	98	0	0	0	0	0	0	0	0	0	0
407	GATGAACGCTGGCGGCGTGCTTAACACATGCAAGTCGAACGGAAAGGCCAGTGCTTGCACTGGTACTCGAGTGGCGAACGGGTGAGTAACACGTGGGTGATCTGCCCTGTACTTCGGGATAAGCTTGGGAAACTGGGTCTAATACCGGATAGGACAACTTTTTGGATATTGTTGTGGAAAGCTTTTGCGGTATGGGATGAGCTCGCGGCCTATCAGCTTGTTGGTGGGGTAATGGCCTACCAAGGCGTCGACGGGTAGCCGGCCTGAGAGGGTGTACGGCCACATTGGGACTGAGATACGGCCCAG	0	0	0	0	0	0	0	0	0	0	0	0	0	0	0	0	0	0	0	0	0	27	0	0	0	0	0	0	0	0	0	0	0	0	0	0	0	0	0	134	64	0	0	74	11	0	0	0
408	AGTGAACGCTGGCGGTAGGCCTAACACATGCAAGTCGAACGGCAGCACAGGAGAGCTTGCTCTCTGGGTGGCGAGTGGCGGACGGGTGAGGAATACATCGGAATCTACTCTGTCGTGGGGGATAACGTAGGGAAACTTACGCTAATACCGCATACGACCTACGGGTGAAAGCAGGGGATCTTCGGACCTTGCGCGATTGAATGAGCCGATGTCGGATTAGCTAGTTGGCGGGGTAAAGGCCCACCAAGGCGACGATCCGTAGCTGGTCTGAGAGGATGATCAGCCACACTGGAACTGAGACACGGTCCAG	0	0	0	0	0	0	0	0	0	0	0	0	0	0	0	0	0	0	0	0	0	0	0	0	0	0	0	597	0	0	0	0	0	0	0	0	0	0	0	0	0	0	0	0	0	0	0	0
409	GACGAACGCTGGCGGCGTGCCTAATACATGCAAGTAGAACGCACAGGATGCACCGTAGTTTACTACACCGTATTCTGTGAGTTGCGAACGGGTGAGTAACGCGTAGGTAACCTGCCTGGTAGCGGGGGATAACTATTGGAAACGATAGCTAATACCGCATAAGAACATTTACTGCATGGTAGATGTTTAAAAGGTGCAAAAGCATCACTACCAGATGGACCTGCGTTGTATTAGCTAGTTGGTGAGGTAACGGCTCACCAAGGCAACGATACATAGCCGACCTGAGAGGGTGATCGGCCACACTGGGACTGAGACACGGCCCAG	0	0	0	0	0	0	0	0	0	0	0	0	0	0	0	0	0	0	0	460	0	0	0	0	0	151	0	0	0	0	0	0	0	0	0	0	0	0	0	0	0	0	0	0	0	0	0	0
410	GACGAACGCTGGCGGCGTGCTTAACACATGCAAGTCGAACGGGATCCATTGGTGCTTGCACTTTTGGTGAGAGTGGCGAACGGGTGAGTAACACGTGAGTAACCTGCCCTTTTCTTTGGGATAAGCCTGGGAAACTGGGTCTAATACTGGATGTTCCGGCTTCCTCGCATGGGGTTGTTGGGAAAGGTTTTTTCTGGATTGGGATGGGCTCGCGGCTTATCAGCTTGTTGGTGGGGTGATGGCTTACCAAGGCTTTGACGGGTAGCCGGCCTGAGAGGGTGGTCGGTCACACGGGGACTGAGATACGGCCAAG	0	0	0	0	0	0	0	0	0	0	0	0	0	0	0	0	0	0	0	0	0	0	0	0	0	0	0	0	0	0	0	0	0	0	0	0	0	0	0	0	0	0	0	0	0	0	0	0
411	AGCGAACGTTAGCGGCAGGCCTAACACATGCAAGTCGCACGAGAATTCGGCTTCGGCCGATAGTAAAGTGGCGGACGGGTGAGTAACACGTGGATAATCTGCCCTTCGGCGGGGGACAACAGTCCGAAAGGATTGCTAATACCGCATACGTCAACGAGGTCTTCGGATCTTGTTGGGAAAGATGGCCTCTTCATGAAAGCTATCACCGGAGGATGAGTCCGCGGCCCATCAGCTAGTTGGCGGGGTAATGGCCCACCAAGGCTTAGACGGGTAGCTGGTCTGAGAGGATGATCAGCCACACTGGAACTGAGACACGGTCCAG	0	0	0	0	0	0	0	3	0	0	0	1197	0	0	0	0	0	0	0	0	0	0	0	0	0	0	0	0	0	0	0	0	0	0	0	0	0	0	0	0	0	0	0	0	0	0	0	0
412	GATGAACGCTGGCGGCGTGCCTAACACATGCAAGTCGAACGATTAAAGCACCTTCGGGTGTGTATAGAGTGGCGAACGGGTGAGTAACACGTGACCAACCTGCCTCTTACATTGGGACAACCAAAAGAAATTCTGGCTAATACCAAATACTCCGCACATATCACATGATGTATGCGGGAAAGCTTTTGCGGTAAGAGATGGGGTCGCGGCCCATTAGGTAGACGGCGGGGTAGAAGCCCACCGTGCCGATGATGGGTAGCCGGGTTGAGAGACCGACCGGCCACATTGGGACTGAGATACGGCCCAG	0	0	0	0	0	0	0	0	0	0	0	0	0	0	0	0	0	0	0	0	0	0	0	0	0	0	0	0	0	0	0	0	0	0	0	0	0	0	0	0	0	0	0	0	0	0	0	0
413	ATTGAACGCTGGCGGCATGCCTTACACATGCAAGTCGAACGGCAGCACGGGGGCAACCCTGGTGGCGAGTGGCGAACGGGTGAGTAACACATCGGAATGTACCCAGTGGTGGGGGATAACGTACCGAAAGGTACGCTAATACCGCGTACGACCTACGGGTGAAAGCGGGGGACTCAGCAATGGGCCTCGCGCCATTGGAGCAGCCGATGTCTGATTAGCTTGTTGGTGGGGTAAAAGCTCACCAAGGCGACGATCAGTAGCTGGTCTGAGAGGACGATCAGCCACACTGGGACTGAGACACGGCCCAG	0	0	0	0	0	0	0	0	0	0	0	0	0	0	0	0	0	0	0	0	0	0	0	0	0	0	0	0	0	0	0	0	0	0	0	0	0	0	0	0	0	0	0	0	0	0	0	0
414	GACGAACGCTGGCGGCGTGCCTAATACATGCAAGTCGAACGCTTCTTTTTCCACCGGAGCTTGCTCCACCGGAAAAAGAAGAGTGGCGAACGGGTGAGTAACACGTGGGTAACCTGCCCATCAGAAGGGGATAACACTTGGAAACAGGTGCTAATACCGTATAACAATCAAAATCGCATGGTTTTGATTTGAAAGGCGCTTTCGGGTGTCGCTGATGGATGGACCCGCGGTGCATTAGCTAGTTGGTGAGGTAACGGCTCACCAAGGCCACGATGCATAGCCGACCTGAGAGGGTGATCGGCCACATTGGGACTGAGACACGGCCCAA	0	0	0	0	0	0	0	0	0	0	0	0	0	0	0	0	0	0	0	0	0	0	0	0	0	0	0	0	0	0	0	0	0	0	0	0	0	0	0	0	0	0	0	0	0	0	0	0
415	GATGAACGCTGGCGGCGTGCTTAACACATGCAAGTCGAACGGGATCCATCGGGCTTTGCTTGGTGGTGAGAGTGGCGAACGGGTGAGTAATGCGTGACCGACCTGCCCCATGCTCCGGAATAGCTCCTGGAAACGGGTGGTAATGCCGGATGTTCCACATGATCGCATGTGATTGTGGGAAAGATTCTATCGGCGTGGGATGGGGTCGCGTCCTATCAGCTTGTTGGTGAGGTAACGGCTCACCAAGGCTTCGACGGGTAGCCGGCCTGAGAGGGCGACCGGCCACATTGGGACTGAGATACGGCCCAG	0	0	0	0	0	0	0	0	0	0	0	0	0	0	0	0	0	0	0	0	0	0	0	0	0	0	0	0	0	0	0	0	0	0	0	0	0	0	0	0	0	0	0	0	0	0	0	0
416	GACGAACGCTGGCGGCGTGCTTAACACATGCAAGTCGAACGATGAAGCGGTGCTTGCACCGTGGATTAGTGGCGAACGGGTGAGTAATACGTGAGTGACCTACCTTTGACTCTGGGATAAGCCTGGGAAACTGGGTCTAATACCGGATACGACCAATCTCTGCATGGGGTGTTGGTGGAAAGCGTTATGGAGTGGTTTTAGATGGGCTCACGGCCTATCAGCTTGTTGGTGAGGTAATGGCTTACCAAGGCGACGACGGGTAGCCGGCCTGAGAGGGTGACCGGCCACACTGGGACTGAGACACGGCCCAG	0	0	0	57	0	0	0	0	0	0	0	0	0	0	0	0	0	0	0	0	2	0	0	0	0	0	0	0	0	0	0	0	0	0	0	0	0	0	0	0	0	0	0	0	0	0	0	0
417	GACGAACGCTGGCGGCGTGCTTAACACATGCAAGTCGAACGAGAGGACATGAAAAGCTTGCTTTTTATGAAATCTAGTGGCAAACGGGTGAGTAACACGTAAACAACCTGCCTTCAAGATGGGGACAACAGACGGAAACGACTGCTAATACCGAATACGATCCGAAAGTCGCATGACATTTGGATGAAAGGGTGGCCTATCGAAGAAGCTATCGCTTGAAGAGGGGTTTGCGTCCGATTAGGTAGTTGGTGAGGTAACGGCCCACCAAGCCGACGATCGGTAGCCGGTCTGAGAGGATGAACGGCCACACTGGAACTGAGACACGGTCCAG	0	0	0	0	0	0	0	0	0	0	0	0	0	0	0	0	0	0	29	0	0	0	0	0	10	0	0	0	0	0	0	0	0	0	0	0	0	0	0	0	0	0	41	0	0	0	0	0
418	GACGAACGCTGGCGGCGTGCCTAATACATGCAAGTCGAGCGAGCTTGCCTATAGAAATTCTTCGGAATGGACATAGATACAAGCTAGCGGCGGATGGGTGAGTAACGCGTGGGTAACCTGCCCTTAAGTCTGGGATACCATTTGGAAACAGATGCTAATACCGGATAAAAGCTACTTTCGCATGAAAGAAGTTTAAAAGGCGGCGTAAGCTGTCGCTAAAGGATGGACCTGCGATGCATTAGCTAGTTGGTAAGGTAACGGCTTACCAAGGCGATGATGCATAGCCGAGTTGAGAGACTGAACGGCCACATTGGGACTGAGACACGGCCCAA	0	0	0	0	0	0	0	0	0	0	0	0	0	0	0	0	0	0	0	0	0	0	0	0	0	0	0	0	0	0	0	0	0	0	0	0	0	0	0	0	0	0	0	0	0	0	0	0
419	ATTGAACGCTGGCGGCAGGCCTAACACATGCAAGTCGAGCGGTAGCACAGAGAGCTTGCTCTCGGGTGACGAGCGGCGGACGGGTGAGTAATGTCTGGGAAACTGCCTGATGGAGGGGGATAACTACTGGAAACGGTAGCTAATACCGCATAATGTCGCAAGACCAAAGTGGGGGACCTTCGGGCCTCATACCATCAGATGTGCCCAGATGGGATTAGCTAGTAGGTGGGGTAACGGCTCACCTAGGCGACGATCCCTAGCTGGTCTGAGAGGATGACCAGCCACACTGGAACTGAGACACGGTCCAG	0	0	0	0	0	0	0	0	0	0	0	0	0	0	0	0	0	0	0	0	0	0	0	0	0	0	0	0	0	0	0	0	0	0	0	0	0	0	0	0	0	0	0	0	0	0	0	0
420	GATGAACGCTGGCGGCGTGCTTAACACATGCAAGTCGAACGGAAAGGCCCAAGCTTGCTTGGGTACTCGAGTGGCGAACGGGTGAGTAACACGTGGGTGATCTGCCCCGCACTTCGGGATAAGCCTGGGAAACTGGGTCTAATACCGGATAGGACCACTTCTTGGAGGTTGTGGTGGAAAGTTTTTTCGGTGTGGGATGAGCTCGCGGCCTATCAGCTTGTTGGTGGGGTAATGGCCTACCAAGGCGTCGACGGGTAGCCGGCCTGAGAGGGTGTACGGCCACATTGGGACTGAGATACGGCCCAG	0	0	0	0	0	0	0	0	0	0	0	0	0	0	0	0	0	0	0	0	0	0	0	0	0	0	0	0	0	0	0	0	0	0	0	0	0	0	0	0	0	0	0	0	0	0	0	0
421	GACGAACGCTGGCGGCGTGCTTAACACATGCAAGTCGAACGGGAAGAGATGAAGAGCTTGCTCTTTATCAAATCCAGTGGCAAACGGGTGAGTAACACGTAAACAACCTGCCTTCAGGATGGGGACAACAGACGGAAACGACTGCTAATACCGAATACGTTCCACGGGCCGCATGACCTGTGGAAGAAAGGGTAGCCTCTACCTGTAAGCTATCGCCTGAAGAGGGGTTTGCGTCTGATTAGGCAGTTGGTGGGGTAACGGCCCACCAAACCAACGATCAGTAGCCGGTCTGAGAGGATGAACGGCCACACTGGAACTGAGACACGGTCCAG	0	0	0	0	0	0	0	0	0	0	0	0	0	0	0	0	0	0	49	0	0	0	0	0	0	0	0	0	0	0	0	0	0	0	0	0	0	0	0	0	0	0	104	0	0	0	38	0
422	GACGAACGCTGGCGGCGTGCTTAACACATGCAAGTCGAACGGTAAGGCTCCAGCTTGCTGGGGTACACGAGTGGCGAACGGGTGAGTAACACGTGGGTGACCTGCCCTGCACTTCGGGATAAGCCTGGGAAACTGGGTCTAATACCGGATAGGACCATGGTGTGGATGCTGTGGTGGAAAGTTTTTTCGGTGTGGGATGGGCCCGCGGCCTATCAGCTTGTTGGTGGGGTAATGGCCTACCAAGGCGGCGACGGGTAGCCGGCCTGAGAGGGTGGACGGCCACATTGGGACTGAGACACGGCCCAG	0	0	0	0	0	0	0	0	0	0	0	0	0	0	0	0	0	0	0	0	0	0	0	0	0	0	0	0	0	0	0	0	0	0	0	0	0	0	0	0	0	0	0	0	0	0	0	0
423	AACGAACGCTGGCGGCGGGCCTCATACATGCAAGTCGAGCGCGAAAGTCCGCAAGGATGAGTAAAGCGGCGCACGGGTGAGTAACACGTGGATAATCTACCCTTTGGATTGGAATAACCTGTCGAAAGACGGGCTAATGCCGAGTAAGCCTTCGAGAGCGTGAAGCTCTTGCAGGGAAAGATGGCGCAAGCTATCGCCGATGGATGAGTCTGCGTCCCATTAGTTAGTTGGTGAGGTAATGGCTTACCAAGACAATGATGGGTACCTGGTCTGAGAGGATGATCAGGCACACTGGAACTGAAACACGGTCCAG	0	0	0	0	0	0	0	0	0	0	0	0	0	0	0	0	0	0	0	0	0	0	0	0	0	0	0	0	0	0	0	0	0	0	0	0	0	0	0	0	0	0	0	0	0	0	0	0
424	GATGAACGCTGGCGGCGTGCCTAATACATGCAAGTAGAACGCTGAAGCTTGGTGCTTGCACCGAGCGGATGAGTTGCGAACGGGTGAGTAACGCGTAGGTAACCTGCCTCTTAGCGGGGGATAACTATTGGAAACGATAGCTAATACCGCATAAAAGACGATATCGCATGATATTGATTTGAAAGGTGCAATTGCATCACTAAGAGATGGACCTGCGTTGTATTAGCTAGTTGGTGAGGTAACGGCTCACCAAGGCGACGATACATAGCCGACCTGAGAGGGTGATCGGCCACACTGGGACTGAGACACGGCCCAG	0	0	0	0	0	0	0	0	0	0	0	0	0	0	0	0	0	0	0	0	0	0	0	0	0	70	0	0	0	0	0	0	0	0	0	0	0	0	0	0	0	0	0	0	0	0	0	0
425	ATTGAACGCTGGCGGCAGGCCTAACACATGCAAGTCGAACGGTAACAGGAAACAGCTTGCTGTTTCGCTGACGAGTGGCGGACGGGTGAGTAATGTCTGGGAAACTGCCTGATGGAGGGGGATAACTACTGGAAACGGTAGCTAATACCGCATAACGTCGCAAGACCAAAGAGGGGGACCTTCGGGCCTCTTGCCATCGGATGTGCCCAGATGGGATTAGCTTGTTGGTGGGGTAACGGCTCACCAAGGCGACGATCCCTAGCTGGTCTGAGAGGATGACCAGCCACACTGGAACTGAGACACGGTCCAG	0	0	0	0	0	0	0	0	0	0	0	0	0	0	0	0	0	0	0	0	0	0	0	0	0	0	0	0	0	0	0	0	0	0	0	0	0	0	0	0	0	0	0	0	0	0	0	0
426	GACGAACGCTGGCGGCGTGCTTAACACATGCAAGTCGAACGGTGAAGGAGAGCTTGCTCTCCGGATCAGTGGCGAACGGGTGAGTAACACGTGGACAATCTGCCCCTGACTTCGGGATAACTCCTCGAAAGAGGTGCTAATACCGGATATGAACCTTGCAGGCATCTGCAGGGTTGGAAAGTTTTTCGGTCAGGGATGGGTCCGCGGCCTATCAGCTAGTTGGTGAGGTAATGGCTCACCAAGGCGACGACGGGTAGCCGGCCTGAGAGGGCGACCGGCCACACTGGGACTGAGACACGGCCCAG	0	0	0	0	0	0	0	0	0	0	0	1402	0	0	0	0	0	0	0	0	0	0	0	0	0	0	0	0	0	0	0	0	0	0	0	0	0	0	0	0	0	0	0	0	0	0	0	0
427	GACGAACGCTGGCGGCGTGCCTAATACATGCAAGTCGAACGAGAGCGACCGGTGCTTGCACTGGTCAATCTAGTGGCGAACGGGTGAGTAACACGTGGGTAACCTGCCCATCAGAGGGGGATAACATTCGGAAACGGATGCTAAAACCGCATAGGTCTTCGAACCGCATGGTTTGAAGAGGAAAAGAGGCGCAAGCTTCTGCTGATGGATGGACCCGCGGTGCATTAGCTAGTTGGTGAGGTAACGGCTCACCAAGGCCGTGATGCATAGCCGACCTGAGAGGGTGATCGGCCACATTGGGACTGAGACACGGCCCAA	0	0	0	0	0	0	0	0	0	0	0	0	0	0	0	0	0	0	0	96	0	0	0	0	0	51	0	0	0	0	0	0	0	98	0	0	0	0	0	0	0	0	0	0	0	0	0	0
428	AACGAACGCTGGCGGCGGGCCTCATACATGCAAGTCGAGCGCGAAAGTCCGCAAGGATGAGTAAAGCGGCGCACGGGTGAGTAACACGTGGATAATCTACCCTTTGGATTGGAATAACCTGTCGAAAGACGGGCTAATGCCGAGTAAGCTCTCGGGAGCGTGAAGCTCTTGCGAGGAAAGATGGCGCAAGCTATCGCCGATGGATGAGTCTGCGTCCCATTAGTTAGTTGGTGAGGTAACAGCTTACCAAGACGATGATGGGTACCTGGTCTGAGAGGATGATCAGGCACACTGGAACTGAAACACGGTCCAG	0	0	0	0	0	0	0	0	0	0	0	0	0	0	0	0	0	0	0	0	0	0	44	0	0	0	0	0	0	0	0	0	0	0	0	0	0	0	0	0	0	0	0	0	0	0	0	0
429	AGCGAACGCTGGCGGCGTGCTTAACACATGCAAGTCGAGTGCGCGCCTGTAGCAATACAGGTGGCGCACGGCGCACGGGTGCGTAACACGTGGGTAACCTGCCCTTTGGTGGGGAATAACTTCGCGAAAGCGAAGCTAATTCCGCATAAGATCCGCAAGGATGAAAGCCGAAAGGCGCCGAAGGAGGGGCCCGCGCACGATTAGCTAGTTGGTAGGGTAATGGCCTACCAAGGCTATGATCGTTAGCTGGTCTGAGAGGATGGCCAGCCACACTGGAACTGAGACACGGTCCAG	0	0	6	0	0	0	0	0	0	0	8	0	0	0	0	317	0	0	0	0	0	32	0	0	0	0	0	0	0	0	0	0	0	0	0	0	0	0	0	0	0	0	0	0	0	0	0	0
430	ATTGAACGCTGGCGGCATGCCTTACACATGCAAGTCGAACGGCAGCGGGGGAGCTTGCTCCCGCCGGCGAGTGGCGAACGGGTGAGGAATGCGTCGGGACGCGCCGATCAGAGGGGGATAACTGCCTGAAAGGGTGGCTAATACCGCATATTCTCTGAGGAGGAAAGCGGGGGACCGCAAGGCCTCGCGCTGATTGAGCGGCCGACGCCGGATTAGCTTGTTGGCGGGGTAAAGGCCCACCAAGGCGATGATCCGTAGCGGGTCTGAGAGGATGATCCGCCACATTGGGACTGAGACACGGCCCAG	0	0	0	0	0	0	0	0	0	0	0	0	0	0	0	0	0	0	0	0	0	30	0	0	5	0	0	0	0	0	0	0	0	0	0	0	0	20	0	0	6	0	275	0	0	0	0	0
431	GACGAACGCTGGCGGCGTGCTTAACACATGCAAGTCGAACGATGAAGCGGGTGCTTGCACTCGTGGATTAGTGGCGAACGGGCGAGTAACACGTGAGTAACCTGTCCTTTTCTTTGGGATAACGGCTGGAAACGGCTGCTAATACTGGATATTCAGGCTGCATCGCATGGTGTGGTTTGGAAAGGTTTTTTCTGGGATTGGGTGGGCTCGCGGCCTATCAGCTTGTTGGTGGGGTGATGGCTTACCAAGGCTTTGACGGGTAGCCGGCCTGAGAGGGTGGTCGGTCGCACTGGGACTGAGATACGGCCCAG	0	0	0	0	0	0	0	0	0	0	0	0	0	0	0	0	0	0	0	0	0	0	19	0	5	0	92	0	0	0	0	0	0	0	0	0	3	46	0	0	0	0	192	0	0	0	24	0
432	GATGAACGCTGGCGGCGTGCTTAACACATGCAAGTCGAACGAAACACCTTATTTGATTTTCTTCGGAACTGAAGATTTGGTGATTGAGTGGCGGACGGGTGAGTAACGCGTGGGTAACCTACCCTGTACAGGGGGATAACAGTCAGAAATGACTGCTAATACCGCATAAGACCACAGCACCGCATGGTGCAGGGGTAAAAACTCCGGTGGTACAGGATGGACCCGCGTCTGATTAGCTGGTTGGTGAGGTAACGGCTCACCAAGGCGACGATCAGTAGCCGGCTTGAGAGAGTGAACGGCCACATTGGGACTGAGACACGGCCCAA	0	0	0	0	0	0	0	0	0	0	0	0	0	0	0	0	0	0	0	38	0	0	0	0	0	0	0	0	0	0	0	0	0	0	0	0	0	0	3	0	0	0	0	0	0	0	0	0
433	GATGAACGCTGGCGGCGTGCCTAATACATGCAAGTCGAGCGAACAGATAAGGAGCTTGCTCCTTTGACGTTAGCGGCGGACGGGTGAGTAACACGTGGGTAACCTACCTATAAGACTGGGATAACTTCGGGAAACCGGAGCTAATACCGGATAACATTTGGAACCGCATGGTTCTAAAGTGAAAGATGGTTTTGCTATCACTTATAGATGGACCCGCGCCGTATTAGCTAGTTGGTAAGGTAACGGCTTACCAAGGCGACGATACGTAGCCGACCTGAGAGGGTGATCGGCCACACTGGAACTGAGACACGGTCCAG	0	0	0	0	0	0	0	0	0	0	0	0	0	0	0	0	0	0	0	0	0	0	0	0	0	0	0	0	0	0	0	0	0	0	0	0	0	0	0	0	0	0	0	0	0	0	0	0
434	GACGAACGCTGGCGGCGTGCTTAACACATGCAAGTCGAACGGAAAGGCCCCTGCTTGCAGGGGTACTCGAGTGGCGAACGGGTGAGTAACACGTGGGTGATCTGCCCTTCACTTCGGGATAAGCCTGGGAAACTGGGTCTAATACCGGATAGGACCAATCTTTAGTGTGGTTGGTGGAAAGTTTTTTCGGTGGAGGATGAGCCCGCGGCCTATCAGCTTGTTGGTGGGGTAATGGCCTACCAAGGCGACGACGGGTAGCCGGCCTGAGAGGGTGGACGGCCACATTGGGACTGAGACACGGCCCAG	0	0	0	0	0	0	0	0	0	0	0	0	0	0	0	0	0	0	0	0	0	0	0	0	0	0	0	0	0	0	0	0	0	0	0	0	0	0	0	0	0	0	0	0	0	0	0	0
435	AACGAACGCTGGCGGCAGGCCTCAAACATGCAAGTCTAGGGGGGTAGCAATACCCACCGGCGGACGGGTGCGTAACACGTGGGAATATACCTTTCGGTACGGAACAACTGCGGGAAACTGCAGCTAATACCGTATACGTCCTTCGGGAGAAAGTTTTTCGCCGAAAGATTAGCCCGCGTTCGATTAGCTAGTTGGTGAGGTAATGGCTCACCAAGGCTACGATCGATAGCTGTTCTGAGAGGAAGATCAGCCACACTGGGACTGAGACACGGCCCAG	0	0	0	0	0	0	0	0	2	0	0	0	0	573	0	0	43	0	0	0	0	0	0	0	0	13	0	0	0	0	0	0	0	0	0	0	0	0	0	0	44	0	0	0	9	0	0	0
436	GACGAACGCTGGCGGCGCGCTTAACACATGCAAGTCGAGCGATGAAATCTTAACAGAACCCTTCGGGGTGAAGATAAGACGGATTAGCGGCGGACGGGTGAGTAACACGTGAGTAACCTGCCTTTTACACAGGGATAGCCTCGGGAAACCGGGATTAAAACCTGATGAAACTATCAAATCACATGATTAAGAAAGTTAAAACTCCGGTGGTAAAAGATGGACTCGCGTCCCATTAGCTAGTTGGTGAAGGTAACGGCCCACCAAGGCAACGATGGGTAGCCGGCCTGAGAGGGTGAACGGCCACATTGGAACTGAGAAACGGTCCAA	0	0	0	0	0	0	0	0	0	0	0	0	0	0	0	0	0	0	0	0	0	0	0	0	0	0	246	0	0	0	0	0	0	0	0	0	0	0	0	0	0	0	40	0	0	0	0	0
437	GACGAACGCTGGCGGCATGCCTAATACATGCAAGTCGAGCGAACCGACGAAGTGCTTGCACTTCTGACGTTAGCGGCGGACGGGTGAGTAACACGTAAGGAACCTACCTATGAGCGGGGGACAACATCCGGAAACGGGTGCTAATACCGCATAGTAATTTGTCAGGCATCTGACAAATTGGAAAGACGGCTTTTGCTGTCACTCATAGATGGTCTTGCGGTGCATTAGCTAGTTGGTGGGATAAAAGCTTACCAAGGCCATGATGCATAGCCGACCTGAGAGGGTAATCGGCCACACTGGGACTGAGACACGGCCCAG	0	0	0	0	0	0	0	0	0	0	0	0	0	0	0	0	0	0	0	0	0	0	0	0	0	0	0	0	0	0	0	0	0	0	0	0	0	0	0	0	0	0	0	0	0	0	0	0
438	GACGAACGCTGGCGGCGTGCCTAACACATGCAAGTCGAACGGAACTGTTTTGAAAGATTTCTTCGGAATGAATTTGATTTAGTTTAGTGGCGGACGGGTGAGTAACGCGTGAGTAACCTGCCTTCAAGAGGGGGATAACATTCTGAAAAGAATGCTAATACCGCATGACATATCGGAACCACATGGTTTTGATATCAAAGATTTTATCGCTTGAAGATGGACTCGCGTCCGATTAGTTAGTTGGTGAGGTAACGGCTCACCAAGACCGCGATCGGTAGCCGGACTGAGAGGTTGAACGGCCACATTGGGACTGAGACACGGCCCAG	0	0	0	0	0	0	0	0	0	0	0	0	0	0	0	0	0	0	0	0	0	0	0	0	0	20	0	0	0	0	0	0	0	0	0	0	0	0	0	0	0	0	0	0	0	0	0	0
439	GACGAACGCTGGCGGCGTGCCTAATACATGCAAGTCGAACGAACGGAGCTAGGAACTTGTTCCCGGCAAAGTTAGTGGCGCACGGGTGAGTAACACGTGGAGAACCTACCCTTTTGCGGGGGATAACCATTGGAAACGATGACTAATACCGCATAGAATCGCAGATCGCATGATCAACGAAGGAAAGACGGCTTCGGCTGTCACAAAAGGATGGCTCCGCGGTGCATTAGCTAGATGGTGGGGTAACGGCCTACCATGGCAACGATGCATAGCCGACCTGAGAGGGTGATCGGCCACATTGGGACTGAGACACGGCCCAA	0	0	0	0	0	0	0	0	0	0	0	0	0	0	0	0	0	0	7	0	0	0	0	0	0	0	0	0	0	0	0	0	0	0	0	0	0	0	0	0	0	0	0	0	0	0	0	0
440	GATGAACGCTAGCGGCAGGCTTAATACATGCAAGTCGTGGGGCAGCAGGTCTGTAGCAATACAGATGCTGGCGACCGGCAAACGGGTGCGGAACACGTACACAACCTTCCTTTAAGTGGGGAATAGCCCGGGGAAACCCGGATTAATACCCCGTAACATATAGAAGCGGCATCGCTTTTATATTATAGCTCCGGCGCTTAGAGATGGGTGTGCGGCTGATTAGATAGTTGGCGGGGTAACGGCCCACCAAGTCGACGATCAGTAACTGGTGTGAGAGCACGACCAGTCACACGGGCACTGAGACACGGGCCCG	0	0	0	0	0	0	0	0	0	0	0	0	0	0	0	0	0	0	0	0	0	0	0	0	0	0	0	0	0	0	0	0	0	0	0	0	0	0	0	0	0	0	0	0	0	0	0	0
441	GACGAACGCTGGCGGCGTGCCTAATACATGCAAGTCGAGCGAGCGGAACTAACAGATTTACCTCGGTAATGACGTTAGGAAAGCGAGCGGCGGATGGGTGAGTAACACGTGGGGAACCTGCCCCATAGTCTGGGATACCACTTGGAAACAGGTGCTAATACCGGATAAGAAAGCAGATCGCATGATCAGCTTTTAAAAGGCGGCGTAAGCTGTCGCTATGGGATGGCCCCGCGGTGCATTAGCTAGTTGGTAAGGTAAAGGCTTACCAAGGCGATGATGCATAGCCGAGTTGAGAGACTGAACGGCCACATTGGGACTGAGACACGGCCCAA	0	0	0	0	0	0	0	0	0	0	0	0	0	0	0	741	0	0	0	0	0	0	0	0	0	0	0	0	0	0	0	0	0	0	0	0	0	0	0	0	0	0	0	0	0	0	0	0
442	ATTGAACGCTGGCGGCATGCTTTACACATGCAAGTCGAACGGCAGCGAAGAGAAGCTTGCTTCTCTGTCGGCGAGTGGCGAACGGGTGAGTATAGCATCGGAACGTGCCAAGTAGTGGGGGATAACCAAGCGAAAGTTTGGCTAATACCGCATAAGCTCTAAGGAGGAAAGTAGGGGACCGTAAGGCCTTACGCTATTTGATCGGCCGATGTCGGATTAGCTAGTTGGTGAGGTAATGGCTCACCAAGGCGATGATCCGTAGCGGGTCTGAGAGGACGATCCGCCACACTGGGACTGAGACACGGCCCAG	0	0	0	0	0	0	0	0	0	0	0	0	0	0	0	0	0	0	0	0	0	0	0	0	0	0	0	0	0	0	0	0	0	0	0	0	0	0	0	0	0	0	0	0	0	0	0	0
443	GACGAACGCTGGCGGCGCGCCTAACACATGCAAGTCGAACGGAGCTTAGAGAGCTTGCTTTTTAAGCTTAGTGGCGAACGGGTGAGTAACGCGTGAGTAACCTGCCCTAGAGTGGGGGACAACAGTTGGAAACGACTGCTAATACCGCATAAGCCCACGGTACCGCATGGTACTGAGGGAAAAGGATTTATTCGCTTTAGGATGGACTCGCGTCCAATTAGCTAGTTGGTGAGGTAACGGCCCACCAAGGCGACGATTGGTAGCCGGACTGAGAGGTTGAACGGCCACATTGGGACTGAGACACGGCCCAG	0	0	0	0	0	0	0	0	0	0	0	0	0	0	0	0	0	0	0	0	0	0	0	0	0	44	0	0	0	0	0	0	0	0	0	0	0	0	0	0	0	0	0	0	0	0	0	0
444	GACGAACGCTGGCGGTGTGCTTAACACATGCAAGTCGAACGGTAAGGCCCTTTCGGGGGTACACGAGTGGCGAACGGGTGAGTAACACGTGAGTAACCTGCCCTCATCTCTGGGATAACAGTCGGAAACGGTTGCTAATACTGGATATGAGCCTGCAAGGCATCTTGTGGGTTGGAAAGATTTTTTGGTTGGGGATGGACTCGCGGCCTATCAGCTTGTTGGTGAGGTAGTGGCTCACCAAGGCTTCGACGGGTAGCCGGCCTGAGAGGGCGACCGGCCACATTGGGACTGAGATACGGCCCAA	0	0	0	0	0	0	0	0	0	0	0	0	0	0	0	1279	0	0	0	0	0	0	0	0	0	0	0	0	0	0	0	0	0	0	0	0	0	0	0	0	0	0	0	0	0	0	0	0
445	GACGAACGCTGGCGGCGTGCTTAACACATGCAAGTCGAACGGGATTTAGTAAACGGAAGCCTCGGTGGAAGATTACTAATGAGAGTGGCGAACGGGTGAGTAACGCGTGAGCAACCTGCCTATGACAGTGGGATAGCCTCGGGAAACCGGGATTAATACCGCATAAAATCGTAGAAACACATGTTTCAACGGTCAAAGATTTATCGGTCATAGATGGGCTCGCGTCTGATTAGCTAGTTGGTGAGATAACAGCCCACCAAGGCGACGATCAGTAGCCGGTCTGAGAGGATGAACGGCCACATTGGAACTGAGACACGGTCCAA	0	0	0	0	0	0	0	0	0	0	0	0	0	0	0	0	0	0	0	0	0	0	0	0	0	0	0	0	0	0	0	0	0	0	0	0	0	0	0	0	0	0	0	0	0	0	0	0
446	GACGAACGCTGGCGGCGTGCCTAATACATGCAAGTCGAGCGAGCGAAACTAACAGATTTACTTCGGTAATGACGTTAGGAAAGCGAGCGGCGGATGGGCGAGTAACACGTGGGGAACCTGCCCCATAGTCTGGGATACCACTTGGAAACAGGTGCTAATACCGGATAAGAAAGCAGATCGCATGATCAGCTTTTAAAAGGCGGCGTAAGCTGTCGCTATGGGATGGCCCCGCGGTGCATTAGCTAGTTGGTAAGGTAAAGGCTTACCAAGGCGATGATGCATAGCCGAGTTGAGAGACTGATCGGCCACATTGGGACTGAGACACGGCCCAA	0	0	0	0	0	0	0	0	0	0	0	0	0	0	0	0	0	0	0	0	0	0	0	0	0	0	0	0	0	0	0	0	0	0	0	0	0	0	0	0	0	0	0	0	0	0	0	0
447	GATGAACGCTAGCGGCAGGCCTAACACATGCAAGTCGAGGGGTAGAAGGTGCTTGCACCTTTGAGACCGGCGCACGGGTGCGTAACGCGTATGCAACCTACCTTCCACAGGGGAATAGCCCAGAGAAATTTGGATTAATGCCCCATGGCACAGCGAGACGGCATCGTCTTGCTGTTAAAGTAACAACGGTGGAAGATGGGCATGCGTCCCATTAGCTAGTTGGTAAGGTAACGGCTTACCAAGGCTATGATGGGTAGGGGTCCTGAGAGGGAGATCCCCCACACTGGTACTGAGACACGGACCAG	0	0	0	0	0	0	0	0	0	0	0	0	0	0	0	0	0	0	0	0	0	0	0	0	0	0	0	0	0	0	0	0	0	0	0	0	0	0	0	0	0	0	0	0	0	0	0	0
448	GATGAACGCCGGCGGTGTGCCTAATACATGCAAGTCGAGCGCACTGGCCCAACTGATATGACGTGCTTGCACTGAATTGACGTTGGATTCCCAGTGAGCGGCGGACGGGTGAGTAACACGTGGGCAACCTGCCCTGAAGCGGGGGATAACATCTGGAAACAGGTGCTAATACCGCATAACAACGAAAACCACATGGTTTTCGTTTCAAAGATGGCTTCGGCTATCACTTCAGGATGGGCCCGCGGTGCATTAGCTAGTTGGTAAGGTAACGGCTTACCAAGGCGATGATGCATAGCCGAGTTGAGAGACTGATCGGCCACAATGGAACTGAGACACGGTCCAT	0	0	0	0	0	0	0	0	0	0	0	0	0	0	0	0	0	0	0	0	0	0	0	0	0	0	0	0	0	0	0	0	0	0	0	0	0	0	0	0	0	0	0	0	0	0	0	0
449	ATTGAACGCTGGCGGCATGCTTAACACATGCAAGTCGAACGGCAGCGCGGGGAAGCTTGCTTCCCTGGCGGCGAGTGGCGGACGGGTGAGTAATGCGTAGGAATCTGCCCCAAAGTGGGGGACAACCCGGGGAAACTCGGGCTAATACCGCATAATCTTTTCGAAGCAAAGAAGGGGACCTTCGGGCCTTTCGCTTTGGGATGAGCCTACGTCGGATTAGCTAGTTGGTAGGGTAAAGGCCTACCAAGGCAACGATCCGTAGCTGGTCTGAGAGGACGACCAGCCACACTGGGACTGAGATACGGCCCAG	0	0	0	0	0	0	0	0	0	0	0	0	0	0	0	0	0	0	0	0	0	0	0	0	0	0	0	0	0	0	0	0	0	0	0	0	0	0	0	0	0	0	0	0	0	1185	0	0
450	GATGAACGCTAGCTACAGGCTTAACACATGCAAGTCGAGGGGAAACGACATCGAAAGCTTGCTTTTGATGGGCGTCGACCGGCGCACGGGTGAGTAACGCGTATCCAACCTGCCCACCACTTGGGGATAACCTTGCGAAAGTAAGACTAATACCCAATGACGTCTCTAGAAGACATCTGAAAGAGATTAAAGATTTATCGGTGATGGATGGGGATGCGTCTGATTAGCTTGTTGGCGGGGTAACGGCTCACCAAGGCAACGATCAGTAGGGGTTCTGAGAGGAAGGTCCCCCACATTGGAACTGAGACACGGTCCAA	0	0	0	0	0	0	0	0	0	0	0	0	0	0	0	0	0	0	0	0	0	0	0	0	0	0	0	0	0	0	0	0	0	0	0	0	0	0	0	0	0	0	0	0	0	0	0	0
451	GACGAACGCTGGCGGCGTGCTTAACACATGCAAGTCGAACGATGAAGCCTAGCTTGCTAGGTGGATTAGTGGCGAACGGGTGAGTAATACGTGAGTAACCTACCTTTAACTCTGGGATAAGCCCGGGAAACTGGGTCTAATACCGGATACGACCAATCTCCGCATGGGGTGTTGGTGGAAAGCGTTATGTAGTGGTTATAGATGGGCTCACGGCCTATCAGCTTGTTGGTGAGGTAACGGCTCACCAAGGCGACGACGGGTAGCCGGCCTGAGAGGGTGACCGGCCACACTGGGACTGAGACACGGCCCAG	0	0	0	0	0	0	0	0	0	0	0	0	0	0	0	0	0	0	0	68	0	0	0	0	0	38	0	0	0	0	0	0	0	0	0	0	0	0	0	0	0	0	0	0	0	0	0	0
452	GACGAACGCTGGCGGCGTGCTTAACACATGCAAGTCGAACGGGATTTAGTAAACAGAAGCCTCGGCTAAAGATTACTAATGAGAGTGGCGAACGGGTGAGTAACGCGTGAGCAACCTGCCTATGACAGTGGGATAGCCTCGGGAAACCGGGATTAATACCGCATAAAATCGTAGAAACACATGTTTCAACGGTCAAAGATTTATCGGTCATAGATGGGCTCGCGTCTGATTAGCTAGTTGGTGAGATAACAGCCCACCAAGGCGACGATCAGTAGCCGGTCTGAGAGGATGAACGGCCACATTGGAACTGAGACACGGTCCAA	0	0	0	0	0	0	0	0	0	0	0	0	0	0	0	0	0	0	0	0	0	0	0	0	0	0	0	0	0	0	0	0	0	0	0	0	0	0	0	0	0	0	0	0	0	0	0	0
453	GACGAACGCTGGCGGCGTGCCTAATACATGCAAGTCGAGCGAGCTTGCCTATAGAAATTCTTCGGAATGGACATAGATACAAGCTAGCGGCGGATGGGTGAGTAACGCGTGGGTAACCTGCCCTTAAGTCTGGGATACCATTTGGAAACAGATGCTAATACCGGATAAAAGCTACTTTCGCATGAAAGAAGTTTAAAAGGCGGCGTAAGCTGTCGCTAAAGGATGGACCTGCGATGCATTAGCTAGTTGGTAAGGTAACGGCTTACCAAGGCGATGATGCATAGCCGAGTTGAGAGATTGATCGGCCACATTGGGACTGAGACACGGCCCAA	0	0	0	0	0	0	0	0	0	0	0	0	0	0	0	0	0	0	0	0	0	0	0	0	0	0	0	0	0	0	0	0	0	0	0	0	0	0	0	0	0	0	0	0	0	0	0	0
454	ATTGAACGCTGGCGGCATGCCTTACACATGCAAGTCGAACGGCAGCACGGGTGCTTGCACCTGGTGGCGAGTGGCGAACGGGTGAGTAATACATCGGAATGTACCTTGTAGTGGGGGATAGCTCGGCGAAAGCCGGATTAATACCGCATACGCTCTGAGGAGGAAAGCGGGGGACCTTCGGGCCTCGCGCTACAAGAGCAGCCGATGTCAGATTAGCTAGTTGGTGAGGTAAAAGCTCACCAAGGCGACGATCTGTAGCTGGTCTGAGAGGACGACCAGCCACACTGGGACTGAGACACGGCCCAG	0	0	0	0	0	0	0	0	0	0	0	0	0	0	0	0	0	0	0	0	0	0	0	0	0	0	0	0	0	0	0	0	0	0	0	0	0	0	0	0	0	0	0	0	0	0	0	0
455	GATGAACGCTGGCGGCGTGCTTAACACATGCAAGTCGAACGATGAAGCCTGGTGCTTGCACCGGGTGGATTAGTGGCGAACGGGTGAGTATCACGTGAGTAACCTACCCTTGACTCTGGGATAAGCCCGGGAAACTGGGTCTAATACCGGATATGACCAGTCACCGCATGGTGTGCTGGTGGAAAGCTTTAGCGGTTTTGGATGGACTCGCGGCCTATCAGCTAGACGGTGAGGTAATGGCTCACCGTGGCGATGACGGGTAGCCGGCCTGAGAGGGTGACCGGCCACACTGGGACTGAGACACGGCCCAG	0	0	0	0	0	0	0	0	0	0	0	0	0	0	0	0	0	0	0	0	0	0	0	0	0	0	0	0	0	0	0	0	0	0	0	0	0	0	0	0	0	0	0	0	0	0	0	0
456	GATGAACGCTAGCGATAGGCTTAACACATGCAAGTCGAGGGGCAGCATGGTCTTAGCTTGCTAAGACTGATGGCGACCGGCGCACGGGTGCGTAACGCGTATGCAACTTGCCTCACAGAGGGGGATAACCCGTCGAAAGACGGACTAATACCGCGTACACTTACAGGAGGGCATCCTCCAGTAAGGAAATGAAATTCGCTGTGAGATAGGCATGCGTCCCATTAGCTAGTTGGTGAGGTAACGGCTCACCAAGGCGACGATGGGTAGGGGAACTGAGAGGTTGAACCCCCACACTGGTACTGAGACACGGACCAG	0	0	0	0	0	0	0	0	0	0	0	0	0	0	0	0	0	0	0	0	0	0	0	0	0	0	0	0	0	0	0	0	0	0	0	0	0	0	0	0	0	0	0	0	0	1223	0	0
457	ATTGAACGCTGGCGGCAGGCTTAACACATGCAAGTCGAACGATGATTATCTAGCTTGCTAGATATGATTAGTGGCGGACGGGTGAGTAACATTTAGGAATCTGCCTAGTAGTGGGGGATAGCTCGGGGAAACTCGAATTAATACCGCATACGACCTACGGGTGAAAGGGGGCGCAAGCTCTTGCTATTAGATGAGCCTAAATCAGATTAGCTAGTTGGTGGGGTAAAGGCCCACCAAGGCGACGATCTGTAACTGGTCTGAGAGGATGATCAGTCACACCGGAACTGAGACACGGTCCGG	0	0	0	0	0	0	0	0	0	0	0	0	0	0	0	0	0	0	0	15	0	0	0	0	0	0	0	0	0	0	0	382	0	0	0	5	0	0	0	0	0	0	0	0	0	0	0	0
458	ATTGAACGCTGGCGGCGTGCTTTACACATGCAAGTCGGACGGCAGCACATCTAGCAATAGAGGGTGGCGAGTGGCGGACGGGTGAGTAATACATCGAGACGTGCCTATTAGTTGGGGATAACTCATCGAAAGATGAGCTAATACCGAATAATCTCTGAGGAGGAAAGCTGGGGACCTGCGAGGGCCTGGCGCTGATAGAGCGGTCGATGGTCGATTAGTTAGTTGGTGGGGTAAAGGCTTACCAAGGCGATGATCGATAGCTGTTCTGAGAGGAAGATCAGCCACACTGGAACTGAGAGACGGTCCAG	0	0	0	0	0	0	0	0	0	0	0	0	0	0	0	0	0	0	0	0	0	0	0	0	0	0	0	0	0	0	0	0	0	0	0	0	0	0	0	0	0	0	0	0	0	0	0	0
459	GACGAACGCTGGCGGCGTGCTTAACACATGCAAGTCGAGCGGAAAGGCCCTTCGGGGTACTCGAGCGGCGAACGGGTGAGTAACACGTGAGTAATCTGCCCTTGGCTTTGGGATAACTACCGGAAACGGTGGCTAATACCGGATACGACGACCGCCTGCATGGGCTGGTTGTGGAAAGTTTTTTCGGCCAGGGATGTGCTCGCGGCCTATCAGCTTGTTGGTGGGGTAATGGCCTACCAAGGCTTCGACGGGTAGCCGGCCTGAGAGGGTGACCGGCCACACTGGGACTGAGACACGGCCCAG	0	0	0	0	0	0	0	0	0	1205	0	10	0	0	0	0	0	0	0	0	0	0	0	0	0	0	0	0	0	0	0	0	0	0	0	0	0	0	0	0	0	0	0	0	0	0	0	0
460	GATGAACGCTGGCGGCGTGCCTAATACATGCAAGTCGAACGCGCCGAGAAGGGAACTTGTTCCTTTCAACGCGAGTGGCGAACGGGTGAGTAACACGTGGGAAACCTACCCTTCAGCGGGGGATAACCATCGGAAACGATGACTAATACCGCATAGTTGTTCCAGTCGCATGACTGGAATGGGAAAGACGGCTTCGGCTGTCACTGAAGGATGGTCCCGCGGTGCATTAGCTAGACGGTGGGGTAACGGCCTACCGTGGCTTTGATGCATAGCCGACCTGAGAGGGTGATCGGCCACATTGGGACTGAGACACGGCCCAA	0	0	0	0	0	0	0	0	0	0	0	0	0	0	0	0	0	0	0	0	0	0	0	0	0	0	0	0	0	0	0	0	0	0	0	0	0	0	0	0	0	0	0	0	0	0	0	0
461	GATGAACGCTGGCGGCGCGCCTAACACATGCAAGTCGAACGATTAAAGCACCTTCGGGTGTGTATAAAGTGGCGAACGGCTGAGTAACACGTGGGCAACCTGCCCCTTTCATTGGGATAGCCACGGGAAACCGTGGATAATACCGAATACTTCGAGACTTCCGCATGGAAGACTCGAGAAAGCTCCGGCGGAGAGGGATGGGCCCGCGGCCTGTTAGCTTGTTGGTGGGGTAACGGCCTACCAAGGCAATGATGGGTAGCTGGGTTGAGAGACCGACCAGCCAGATTGGGACTGAGACACGGCCCAG	0	0	0	0	0	0	0	0	0	0	0	0	0	0	0	0	0	0	0	0	0	0	0	0	0	0	0	0	0	0	0	0	0	0	0	0	0	0	0	0	0	0	0	0	0	0	0	0
462	GACGAACGCTGGCGGCGTGCTTAACACATGCAAGTCGAACGGGATTTAGTAGACAGAAGCTTCGGTGGAAGATTACTAATGAGAGTGGCGAACGGGTGAGTAACGCGTGAGCAACCTGCCTATGACAGTGGGATAGCCTCGGGAAACCGGGATTAATACCGCATAAAATCGTAGAAACACATGTTTTAACGGTCAAAGATTTATCGGTCATAGATGGGCTCGCGTCTGATTAGCTAGTTGGTGAGATAACAGCTCACCAAGGCGACGATCAGTAGCCGGTCTGAGAGGATGAACGGCCACATTGGAACTGAGACACGGTCCAA	0	0	0	0	0	0	0	0	0	0	0	0	0	0	0	0	0	0	0	0	0	0	0	0	0	0	0	0	0	0	0	0	0	0	0	0	0	0	0	0	0	0	0	46	0	0	0	0
463	GATGAACGCTGGCGGCGTGCTTAACACATGCAAGTCGAACGGGATCCAAGGGGTGCTTGCACTTTTTGGTGAGAGTGGCGAACGGGTGAGTAACACGTGAGTAACCTGTCCTTTTCTTTGGGATAAGCATTCGAAAGGGTGTTTAATACCTTATGTTCTGTCTGCCTCGCATGGGGTGGGTGGGAAAGGCTTTGGCCGGATTTGGGTGGGCTCGCGGTCTATCAGCTTGTTGGTGGGGTGATGGCTTACCAAGGCTTTGACGGGTAGCCGGCCTGAGAGGGTGGTCGGTCACATTGGGACTGAGATACGGCCCAG	0	0	0	0	0	0	0	0	0	0	0	0	0	0	0	0	0	0	0	0	0	0	0	0	0	0	0	0	0	0	0	0	0	0	0	0	0	0	0	0	0	0	0	0	0	0	47	0
464	GACGAACGCTGGCGGCATGCCTAATACATGCAAGTCGAACGATGATATCACTGCTTGCAGTGATTGATTAGTGGCGAACGGGTGAGTAACACGTGAGGAACTTGCCCATGAGCGGGGGACAACATTCGGAAACGGATGCTAATACCCCATAGGTGGATTGGTCGCATGACGAATTCATTAAAGGTGGCTTTGCTACCACTCATGGATAGCCTCGCGGCGTATTAGCTAGTTGGTAAGGTAATGGCTTACCAAGGCAGTGATACGTAGCCGACTTGAGAGGGTGATCGGCCACACTGGGACTGAGACACGGCCCAG	0	0	0	0	0	0	0	0	37	0	0	0	0	0	32	0	0	0	0	0	0	0	0	0	0	0	0	0	0	0	0	0	0	0	0	0	0	0	0	0	0	0	0	0	0	0	0	0
465	GATGAACGCTGGCGGCGTGCTTAACACATGCAAGTCGAACGAAGCACTTTATTTGATTTCCTTCGGGACTGATTATTTTGTGACTGAGTGGCGGACGGGTGAGTAACGCGTGGGTAACCTGCCTTGTACAGGGGGATAACAGTTGGAAACGGCTGCTAATACCGCATAAGCGCACAGCATCGCATGATGCAGTGTGAAAAACTCCGGTGGTATAAGATGGACCCGCGTTGGATTAGCTAGTTGGTGAGGTAACGGCTCACCAAGGCGACGATCCATAGCCGACCTGAGAGGGTGACCGGCCACATTGGGACTGAGACACGGCCCAA	0	0	0	0	0	0	0	0	0	0	0	0	0	0	0	0	0	0	0	0	0	0	0	0	0	0	0	0	0	0	0	0	0	0	0	0	0	0	0	0	0	0	0	0	0	0	0	0
466	AACGAACGCTGGCGGCATGCCTAACACATGCAAGTCGAGCGCCCGTAGCAATACGGGAGCGGCGCACGGGTGAGTAACGCGTGGGAACCTACCCTTAGGTTCGGGACAACCGCGGGAAACTGCGGCTGATACCGGATAATGTCTTCGGACCAAAGATTTATCGCCTTTGGAGGGGCCCGCGTCGGATTAGGTAGTTGGTGGGGTAACGGCTCACCAAGCCTGCGATCCGTAACTGGTCTGAGAGGATGGCCAGTCACACTGGGACTGAGACACGGCCCAG	0	0	0	0	0	0	0	0	0	0	0	0	0	0	0	0	0	0	0	0	0	0	0	0	0	0	17	0	0	79	0	0	0	0	0	0	0	0	0	0	0	0	0	0	0	0	0	0
467	GACGAACGCTGGCGGCGTGCTTAACACATGCAAGTCGAACGAGAGGACATGGGAAGCTTGCTTCCTATGAAATCGAGTGGCAAACGGGTGAGTAACGCGTAAACAACCTGCCCTTCGGATGGGGATAACAGCCGGAAACGGCTGCTAATACCGAATACGATCTTTTCGTCGCATGACGGAAAGAAGAAAGGATGGCCTCTATACAAAGCTATCGCCGAAGGAGGGGTTTGCGTCTGATTAGCTGGTTGGAGGGGTAACGGCCCAACAAGGCAATGATCAGTAGCCGGTCTGAGAGGATGAACGGCCACATTGGGACTGAGACACGGCCCAG	0	0	0	0	0	0	0	0	0	0	0	0	0	0	0	0	0	0	0	0	0	0	0	0	0	0	0	0	0	0	0	0	0	0	0	0	0	0	0	0	0	0	0	0	0	0	0	0
468	ATTGAACGCTGGCGGCATGCTTTACACATGCAAGTCGAACGGCAGCGAGGAGAAGCTTGCTTCTCTGTCGGCGAGTGGCGAACGGGTGAGTATAGCATCGGAACGTGCCAAGTAGTGGGGGATAACCAAACGAAAGTTTGGCTAATACCGCGTAAGCTCCAAGGAGGAAAGTAGGGGACCTAAATAAGGCCTTACGCTATTTGATCGGCCGATGTCGGATTAGCTAGTTGGTGGGGTAATGGCTCACCAAGGCAATGATCCGTAGCGGGTCTGAGAGGACGATCCGCCACACTGGGACTGAGACACGGCCCAG	0	0	0	0	0	0	0	0	0	0	0	0	0	0	809	0	0	0	0	0	0	0	0	0	0	0	0	0	0	0	0	0	0	0	0	0	0	0	0	0	0	0	0	0	0	0	0	0
469	GATGAACGCTGGCGGCGTGCCTAATACATGCAAGTCGAGCGAACAGATAAGGAGCTTGCTCCTTTGACGTTAGCGGCGGACGGGTGAGTAACACGTGGGTAACCTACCTATAAGACTGGGATAACTTCGGGAAACCGGAGCTAATACCGGATAATATTTCGAACCGCATGGTTCGATAGTGAAAGATGGATTTGCTATCACTTATAGATGGACCCGCGCCGTATTAGCTAGTTGGTAAGGTAACGGCTTACCAAGGCGACGATACGTAGCCGACCTGAGAGGGTGATCGGCCACACTGGAACTGAGACACGGTCCAG	0	0	0	0	0	0	0	0	0	0	0	0	0	0	0	0	0	0	0	0	0	0	0	0	0	0	0	0	0	0	0	0	0	0	0	0	0	0	0	0	0	0	0	0	0	0	0	0
470	GATAAACGCTGGCGGCGTGCATAACACATGCAAGTCGAACGATGAAACTTGAATGATTTCTTCGGAATGAACTTAAGTGGATTAGTGGCGAACGGGTGAGTAACACGTGAGTAACCTGCCTTACACAAGGGGATAGCCTCTGGAAACGGAGAATAATACCCTATAAAGTCTAATCAGCCCATGCTGGAAAGACCAAAGATTTATCGGTGTAAGATGGACTTGCGTCTGATTAGCTAGTTGGTGAGATAAAAGCTCACCAAGGCGACGATCAGTAGCCGGCTTGAGAGAGTGTACGGCCACATTGGGACTGAGACACGGCCCAA	0	0	0	0	0	0	0	0	0	0	0	0	0	0	0	0	0	0	0	0	0	0	0	0	0	0	0	0	0	0	0	0	0	0	0	0	0	0	0	0	0	0	0	0	0	0	0	0
471	GATGAACGCTGGCGGCGTGCTTAACACATGCAAGTCGAACGAAGCACTTTATTTGATTTCCTTCGGGACTGATTATTTTGTGACTGAGTGGCGGACGGGTGAGTAACGCGTGGGCAACCTGCCTTGTACAGGGGGATAACAGTTGGAAACGGCTGCTAATACCGCATAAGCGCACAGCATCGCATGATGCAGTGTGAAAAACTCCGGTGGTATAAGATGGACCCGCGTTGGATTAGCTAGTTGGTGAGGTAACGGCCCACCAAGGCGACGATCCATAGCCGACCTGAGAGGGTGACCGGCCACATTGGGACTGAGACACGGCCCAA	0	0	0	0	0	0	0	0	0	0	0	0	0	0	0	0	0	0	0	0	0	0	0	0	0	0	0	0	0	0	0	0	0	0	0	0	0	0	0	0	0	0	0	0	0	0	0	0
472	ATTGAACGCTGGCGGCAGGCTTAACACATGCAAGTCGAGCGGGGAAGGGTAGCTTGCTACCTGACCTAGCGGCGGACGGGTGAGTAATGCTTAGGAATCTGCCTATTAGTGGGGGACAACATTCCGAAAGGAATGCTAATACCGCATACGCCCTACGGGGGAAAGCAGGGGATCTTCGGACCTTGCGCTAATAGATGAGCCTAAGTCAGATTAGCTAGTTGGTGGGGTAAAGGCCTACCAAGGCGACGATCTGTAGCGGGTCTGAGAGGATGATCCGCCACACTGGGACTGAGACACGGCCCAG	0	0	0	0	0	0	0	0	0	0	0	0	0	0	0	168	0	0	0	0	0	0	0	0	0	0	0	0	0	0	0	0	0	0	0	0	0	0	0	71	0	0	0	0	0	0	0	0
473	GACGAACGCTGGCGGCGTGCTTAACACATGCAAGTCGAACGGGATTTAGTAGACGGAAACCTCGGTGGAAGATTACTAATGAGAGTGGCGAACGGGTGAGTAACGCGTGAGCAACCTGCCTATGACAGTGGGATAGCCTCGGGAAACCGGGATTAATACCGCATAAAATCGTAGAAACACATGTTTCAACGGTCAAAGATTTATCGGTCATAGATGGGCTCGCGTCTGATTAGCTAGTTGGTGAGATAACAGCCCACCAAGGCGACGATCAGTAGCCGGTCTGAGAGGATGAACGGCCACATTGGAACTGAGACACGGTCCAA	0	0	0	0	0	0	0	0	0	0	0	0	0	0	0	0	0	0	0	0	0	0	0	0	0	0	0	0	0	0	0	0	0	0	0	0	0	0	0	203	0	0	0	0	0	0	0	0
474	ATTGAACGCTGGCGGCATGCTTTACACATGCAAGTCGAACGGCAGCACAGGGAGCTTGCTCCTGGGTGGCGAGTGGCGCACGGGTGAGTAATACATCGGAACGTGTCCTATCGTAGGGGATAACTGATCGAAAGATCAGCTAATACCGCATAAGACCTGAGGGTGAAAGTGGGGGATCGCAAGACCTCACGCGATTGGAGCGGCCGATGCCCGATTAGCTAGTTGGTGAGGTAAAGGCTCACCAAGGCGACGATCGGTAGCTGGTCTGAGAGGACGACCAGCCACACTGGGACTGAGACACGGCCCAG	0	0	0	0	0	0	0	0	0	0	0	0	0	0	0	0	0	0	0	0	0	0	0	0	0	0	0	0	0	0	0	0	0	0	0	0	0	0	0	0	0	0	0	0	0	0	0	0
475	GATGAACGCTAGCTACAGGCTTAACACATGCAAGTCGAGGGGCAGCATGAACTTAGCTTGCTAAGTTTGATGGCGACCGGCGCACGGGTGAGTAACACGTATCCAACCTGCCGATGACTCGGGGATAGCCTTTCGAAAGAAAGATTAATACCCGATGGCATAGTTCTTCCGCATGGTAGAACTATTAAAGGATTTCGGTCATCGATGGGGATGCGTTCCATTAGGTTGTTGGCGGGGTAACGGCCCACCAAGCCTTCGATGGATAGGGGTTCTGAGAGGAAGGTCCCCCACATTGGAACTGAGACACGGTCCAA	0	0	0	0	0	0	0	0	0	0	0	0	0	0	0	0	0	0	0	0	0	0	0	0	0	0	0	0	0	0	0	0	0	0	0	0	0	0	0	0	0	0	0	0	0	0	0	0
476	GATGAACGCTAGCTACAGGCTTAACACATGCAAGTCGCAGGGTAACATGAGGAAAGCTTGCTTTCCTTGATGACGACTGGCGCACGGGTGAGTAACGCGTATCCAACCTTCCCATAACTACGGGATAACCCGTTGAAAGACGGCCTAATACCGTATGACATCGTTTGCTGACATCAAATAACGATTAAAGGTTTAGCGGTTATGGATGGGGATGCGTCTGATTAGCTTGTTGGCGGGGTAACGGCCCACCAAGGCTACGATCAGTAGGGGTTCTGAGAGGAAGGTCCCCCACATTGGAACTGAGACACGGTCCAA	0	0	0	0	0	0	0	0	0	0	0	0	0	0	0	0	0	0	0	0	34	40	0	16	112	0	0	0	0	0	0	0	0	0	0	0	0	0	0	0	0	0	0	0	0	0	0	0
477	GACGAACGCTGGCGGCGTGCTTAACACATGCAAGTCGAACGGTAAGGCTCCAGCTTGCTGGGGTACACGAGTGGCGAACGGGTGAGTAACACGTGGGTGACCTGCCCTGCACTTCGGGATAAGCCTGGGAAACTGGGTCTAATACCGGATAGGACTGCACCGTGAGGGTGTGGTGGAAAGTTTTTTCGGTGTGGGATGGGCCCGCGGCCTATCAGCTTGTTGGTGGGGTAATGGCCTACCAAGGCGGCGACGGGTAGCCGGCCTGAGAGGGTGGACGGCCACATTGGGACTGAGACACGGCCCAG	0	0	0	0	0	0	0	0	0	0	0	0	0	0	0	0	0	0	0	0	0	0	0	0	0	0	0	0	0	0	0	0	0	0	0	0	0	0	0	0	0	0	0	0	0	0	0	0
478	GATGAACGCTGGCGGCGTGCCTAATACATGCAAGTAGAACGCTGAAGCTTGGTGCTTGCACCGAGCGGATGAGTTGCGAACGGGTGAGTAACGCGTAGGTAACCTGCCTCTTAGCGGGGGATAACTATTGGAAACGATAGCTAATACCGCATAAAAGTCGACATCGCATGATGTTGACTTGAAAGGTGCAATTGCATCACTAAGAGATGGACCTGCGTTGTATTAGCTAGTTGGTGAGGTAACGGCTCACCAAGGCGACGATACATAGCCGACCTGAGAGGGTGATCGGCCACACTGGGACTGAGACACGGCCCAG	0	0	0	0	0	0	0	0	0	0	0	0	0	0	0	0	0	0	0	33	0	0	0	0	0	0	0	0	0	0	0	0	0	0	0	0	0	0	0	0	0	0	0	0	0	0	0	0
479	GACGAACGCTGGCGGCGTGCTTAACACATGCAAGTCGAACGGAAAGGCCCTGCTTTTGTGGGGTGCTCGAGTGGCGAACGGGTGAGTAATACGTGAGTAACCTGCCCTTGACTTTGGGATAACTTCAGGAAACTGGGGCTAATACCGGATAGGAGCTCCTGCTGCATGGTGGGGGTTGGAAAGTTTCGGCGGTTGGGGATGGACTCGCGGCTTATCAGCTTGTTGGTGGGGTAGTGGCTTACCAAGGCTTTGACGGGTAGCCGGCCTGAGAGGGTGACCGGCCACATTGGGACTGAGATACGGCCCAG	0	0	0	0	0	0	0	0	0	0	0	0	0	0	0	0	0	0	0	0	0	0	0	0	0	0	0	0	0	0	0	0	0	0	0	0	0	0	0	0	0	0	0	0	0	0	0	0
480	GACGAACGCTGGCGGCGTGCTTAACACATGCAAGTCGAACGGGAAGACATGAAGAGCTTGCTCTTTATGAAATCCAGTGGCAAACGGGTGAGTAACACGTAAACAACCTGCCTTCAGGATGGGGACAACAGACGGAAACGACTGCTAATACCGAATACGATTCTTGAGTCGCATGACACAAGAAAGAAAGGGTGGCCTCTACTTGTAAGCTATCGCCTGAAGAGGGGTTTGCGTCCGATTAGGTAGTTGGTGAGGTAACGGCCCACCAAGCCGACGATCGGTAGCCGGTCTGAGAGGATGAACGGCCACATTGGAACTGAGACACGGTCCAG	0	0	0	0	0	0	0	0	0	0	0	0	0	0	0	0	0	0	0	0	0	0	0	0	0	0	0	0	0	0	0	0	0	0	0	0	13	4	0	0	0	0	21	0	0	0	0	0
481	GATGAACGCTGGCGGCGCGCCTAACACATGCAAGTCGAACGATTAAAGCACCTTCGGGTGTGTATAAAGTGGCGAACGGCTGAGTAACACGTGGGCAACCTGCCTTTTACTTTGGGATAGCCTCGGGAAACCGAGGATAATACCGAATACTTTGTATGTATCGCATGGTATATACAAGAAAGCTTTTGCGGTAAAAGATGGGCCCGCGGCCTGTTAGCTTGTTGGTGAGGTAACGGCTCACCAAGGCAATGATGGGTAGCCGGGTTGAGAGACCGACCGGCCAGATTGGGACTGAGACACGGCCCAG	0	0	0	0	0	0	0	0	0	0	0	0	0	0	0	0	0	0	0	0	0	0	0	0	0	0	0	0	0	0	0	0	0	0	0	0	0	4	0	0	0	0	5	0	0	0	0	0
482	AGCGAACGCTGGCGGCAGGCTTAACACATGCAAGTCGAGCGGGCGTAGCAATACGTCAGCGGCAGACGGGTGAGTAACGCGTGGGAACGTACCTTTTGGTTCGGAACAACACAGGGAAACTTGTGCTAATACCGGATAAGCCCTTACGGGGAAAGATTTATCGCCGAAAGATCGGCCCGCGTCTGATTAGCTAGTTGGTGAGGTAATGGCTCACCAAGGCGACGATCAGTAGCTGGTCTGAGAGGATGATCAGCCACATTGGGACTGAGACACGGCCCAA	0	0	0	0	0	0	0	0	0	0	0	0	0	0	0	0	0	0	0	0	0	0	0	0	0	0	0	0	0	0	0	0	0	0	0	0	0	0	0	0	0	0	0	0	0	0	0	0
483	AGCGAACGCTGGCGGCAGGCTTAACACATGCAAGTCGAACGGTCCTTCGGGATAGTGGCGGACGGGTGAGTAACACGTGGGAACGTACCCTTAGGTTCGGAACAACACAGGGAAACTTGTGCTAATACCGGATAAGCCCTTCGGGGGAAAGATTTATCGCCTTTGGAGCGGCCCGCGTCTGATTAGCTTGTTGGTGAGGTAATGGCTCACCAAGGCTACGATCAGTAGCTGGTCTGAGAGGATGGCCAGCCACACTGGGACTGAGACACGGCCCAG	0	0	0	0	0	0	0	0	0	120	0	0	0	0	0	0	0	0	0	29	0	0	0	0	0	0	0	0	0	0	0	0	0	0	0	0	0	0	0	0	0	0	0	0	2	0	0	0
484	GATGAACGCTGGCGGCGTGCTTAACACATGCAAGTCGAACGATGAAGCCCAGCTTGCTGGGTGGATTAGTGGCGAACGGGTGAGTAACACGTGAGTAACCTGCCCTTAACTCTGGGATAAGCCTGGGAAACTGGGTCTAATACCGGATAGGAGCGCCTACCGCATGGTGGGTGTTGGAAAGATTTATCGGTTTTGGATGGACTCGCGGCCTATCAGCTTGTTGGTGAGGTAATGGCTCACCAAGGCGACGACGGGTAGCCGGCCTGAGAGGGTGACCGGCCACACTGGGACTGAGACACGGCCCAG	0	0	0	0	0	0	0	0	0	0	0	0	0	0	0	0	0	0	0	0	26	0	0	0	0	0	0	0	0	0	0	0	0	0	0	12	0	0	0	0	0	0	0	0	0	0	0	0
485	GATGAACGCTGGCGGCGTGCTTAACACATGCAAGTCGAGCGAAGCAGTTAAGAAGATTCTTCGGATGATTCTTGACTGACTGAGCGGCGGACGGGTGAGTAACGCGTGGGTGACCTGCCCCATACCGGGGGATAACAGCTGGAAACGGCTGCTAATACCGCATAAGCGCACAGAGCTGCATGGCTCGGTGTGAAAAACTCCGGTGGTATGGGATGGGCCCGCGTCTGATTAGGCAGTTGGCGGGGTAACGGCCCACCAAACCGACGATCAGTAGCCGGCCTGAGAGGGCGACCGGCCACATTGGGACTGAGACACGGCCCAA	0	0	0	0	0	0	0	0	0	0	0	0	0	0	0	0	0	0	0	0	0	0	0	0	0	19	0	0	0	0	0	0	0	0	0	0	0	0	0	0	0	0	0	0	0	1115	0	0
486	GATGAACGCTAGCTACAGGCTTAACACATGCAAGTCGCAGGGTAACGTGAGGAAAGCTTGCTTTCCTTGACGACGACTGGCGCACGGGTGAGTAACGCGTATCCAACCTTCCCATGACCACGGGATAACCCGTTGAAAGACGGACTAATACCGTATGACATCGTTTGCTGACATCAAATAACGATTAAAGGTTTAGCGGTGATGGATGGGGATGCGTCTGATTAGCTTGTTGGCGGGGTAACGGCCCACCAAGGCGACGATCAGTAGGGGTTCTGAGAGGAAGGTCCCCCACATTGGAACTGAGACACGGTCCAA	0	0	0	0	0	0	0	0	0	0	0	0	0	0	0	0	0	0	0	0	0	0	0	0	0	0	0	0	0	0	0	0	0	0	0	0	0	0	0	0	0	0	0	0	0	0	0	0
487	ATTGAACGCTGGCGGCATGCTTAACACATGCAAGTCGAACGGTAACAGGCCTTCGGGCGCTGACGAGTGGCGGACGGGTGAGGAATACGTAGGAATCTGCCTAGTAGTGGGGGGTAACTTAGGGAAACTTAAGCTAATACCGCATACGCCCTACGGGGGAAAGCAGGGGATCGCAAGACCTTGCGCTATTAGATGAGCCTACGTCGGATTAGCTAGTTGGTAGGGTAAAGGCCTACCAAGGCGACGATCCGTAGCTGGTCTGAGAGGACGACCAGCCACACTGGGACTGAGACACGGCCCAG	0	0	0	0	0	0	0	0	0	0	0	0	0	0	0	0	0	0	0	0	0	0	0	0	0	0	0	0	0	0	0	0	0	0	0	8	0	3	3	0	0	0	0	0	0	0	0	0
488	GATGAACGCTGGCGGCGTGCCTAACACATGCAAGTCGAACGAGATGCTTATCGGAAAGCTTCGGCCGGAAGATAAGTTATCTAGTGGCGGACGGGTGAGTAACACGTGGGTAACCTGCCTTATGGAGGGGGATAACAGAGAGAAATCACTGCTAATACCGCATAAGCACACAGTACCGCATGGTACAGGGTGAAAAGATTTATCGCCATAAGATGGACCCGCGTCTGATTAGCCAGTTGGCAGGGTAAAAGCCTACCAAAGCAACGATCAGTAGCCGATCTGAGAGGATGACCGGCCACATTGGGACTGAGACACGGCCCAA	0	0	0	0	0	0	0	0	0	0	0	0	0	0	0	0	0	0	0	0	0	0	0	0	0	0	0	0	0	0	0	0	0	0	0	0	0	0	0	0	0	0	0	0	0	0	0	0
489	GACGAACGCTGGCGGCGTGCCTAATACATGCAAGTCGAGCGAGCGGAACTAACAAATTTACTTCGGTAATGACGTTAGGAAAGCGAGCGGCGGATGGGTGAGTAACACGTGGGGAACCTGCCCCATAGTCTGGGATACCACTTGGAAACAGGTGCTAATACCGGATAAGAAAGCAGATCGCATGATCAGCTTTTAAAAGGCGGCGTAAGCTGTCGCTATGGGATGGCCCCGCGGTGCATTAGCTAGTTGGTAAGGTAAAGGCTTACCAAGGCGATGATGCATAGCCGAGTTGAGAGACTGATCGGCCACATTGGGACTGAGACACGGCCCAA	0	0	0	0	0	0	0	0	0	0	0	0	0	0	0	0	0	0	0	0	0	0	0	0	0	0	0	0	0	0	0	0	0	0	0	0	0	0	0	0	0	0	0	0	0	0	0	0
490	GATGAACGCTGGCGGCGCGCCTAACACATGCAAGTCGAACGGTTAAAGCATCTTCGGATGTGTATAAAGTGGCGAACGGCTGAGTAACACGTGGGCAACCTGCCCTTTGCACTGGGATAGCCTCGGGAAACCGAGGTTAATACCGGATACTCCATATCCATCGCATGATAGATATGGGAAAGCTCCGGCGGCAAAGGATGGGCCCGCGGCCTGTTAGCTAGTTGGTGGGGTAGTGGCCTACCAAGGCAATGATGGGTAGCCGGGTTGAGAGACCGACCGGCCAGATTGGGACTGAGACACGGCCCAG	0	0	0	0	0	0	0	0	0	0	0	0	0	0	0	0	0	0	0	0	0	0	0	0	0	0	0	0	0	0	0	0	0	0	0	0	0	0	0	0	0	0	0	0	0	0	0	0
491	ATTGAACGCTGGCGGCATGCCTTACACATGCAAGTCGAACGGCAGCATAGGAGCTTGCTCCTGATGGCGAGTGGCGAACGGGTGAGTAATATATCGGAACGTGCCCTAGAGTGGGGGATAACTAGTCGAAAGACTAGCTAATACCGCATACGATCTACGGATGAAAGTGGGGGATCGCAAGACCTCATGCTCCTGGAGCGGCCGATATCTGATTAGCTAGTTGGTGGGGTAAAAGCCTACCAAGGCAACGATCAGTAGCTGGTCTGAGAGGACGACCAGCCACACTGGGACTGAGACACGGCCCAG	0	0	0	137	0	0	0	0	0	0	0	0	0	181	0	0	0	0	0	0	2	0	0	0	0	0	0	0	0	0	0	0	0	0	0	0	0	0	0	0	0	0	0	0	0	0	0	0
492	ATTGAACGCTGGCGGCATGCTTAACACATGCAAGTCGAACGGCAGCACAGCAGAGCTTGCTCTGTGGGTGGCGAGTGGCGGACGGGTGAGTAATGCATCGGGATCTACCCAAACGTGGGGGATAACGTAGGGAAACTTACGCTAATACCGCATACGTCCTATGGGAGAAAGCGGGGGATCTTCGGACCTCGCGCGGTTGGACGAACCGATGTGCGATTAGCTAGTTGGTAGGGTAACGGCCTACCAAGGCGACGATCGCTAGCTGGTCTGAGAGGATGATCAGCCACACTGGGACTGAGACACGGCCCAG	0	0	0	0	0	0	0	0	0	0	0	0	0	0	0	0	0	0	0	0	0	0	0	0	0	0	0	0	0	0	0	0	0	0	0	0	0	0	0	0	0	0	0	0	0	0	0	0
493	AGCGAACGCTGGCGGCAGGCCTAACACATGCAAGTCGAACGGATCCTTCGGGATTAGTGGCGGACGGGTGAGTAACACGTGGGAACGTGCCCTTTGGTTCGGAACAACTCAGGGAAACTTGAGCTAATACCGGATGTGCCCTTCGGGGGAAAGATTTATCGCCATTGGAGCGGCCCGCGTCTGATTAGCTAGTTGGTGGGGTAAAGGCCCACCAAGGCGACGATCAGTAGCTGGTCTGAGAGGATGATCAGCCACATTGGGACTGAGACACGGCCCAA	0	0	0	0	0	0	0	0	0	0	0	0	0	0	0	0	0	0	0	0	0	0	0	0	0	0	0	0	0	0	0	0	0	0	0	0	0	4	0	0	0	0	0	0	0	0	0	0
494	AGCGAACGCTGGCGGCAGGCTTAACACATGCAAGTCGAGCGGGCCCTTCGGGGTCAGCGGCGGACGGGTGAGTAACGCGTGGGAACGTGCCTTCTGGTCTGGAATAACCCTGGGAAACTAGGGCTAATACCGGATACGCCCTTTTGGGGAAAGGTTTACTGCCGGAAGATCGGCCCGCGTCTGATTAGCTAGTTGGTGGGGTAACGGCCTACCAAGGCGACGATCAGTAGCTGGTCTGAGAGGATGATCAGCCACACTGGGACTGAGACACGGCCCAG	0	0	0	0	0	0	0	0	0	0	0	0	0	0	0	0	0	0	0	0	0	0	0	0	0	0	0	0	0	0	0	0	0	0	0	0	0	0	0	0	0	0	0	0	0	0	0	0
495	GATGAACGCTGGCGGCGTGCCTAATACATGCAAGTCGAGCGAACAGACAAGGAGCTTGCTCCTTTGACGTTAGCGGCGGACGGGTGAATAACACGTGGGTAACCTACCTATAAGACTGGGATAACTTCGGGAAACCGGAGCTAATACCGGATAATATTTCGAACCGCATGGTTCGATAGTGAAAGATGGCTCTGCTATCACTTATAGATGGACCTGCGCCGTATTAGCTAGTTGGTAAGGTAACGGCTTACCAAGGCAACGATACGTAGCCGACCTGAGAGGGTGATCGGCCACACTGGAACTGAGACACGGTCCAG	0	0	0	0	0	0	0	0	0	0	0	0	0	0	0	0	708	0	0	0	0	0	0	0	0	0	0	0	0	0	0	0	0	0	0	0	0	0	0	0	0	0	0	0	0	0	0	0
496	GATGAACGCTGGCGGCGTGCCTAACACATGCAAGTCGAACGGAGATTATTCGCTGCGGAGCCTTCGGGCGAAGCTTGAATGATCTTAGTGGCGGACGGGTGAGTAACGCGTGGGCAACCTGCCTTGCACAGGGGGATAGCAGTTGGAAACGACTGGTAATACCGCATATCTTAGAGAGACCGCATGATCTTTTTAAGAAAACGTTAGTGGTGCAAGATGGGCCCGCGTCCGATTAGATAGTTGGTGGGGTAACGGCCTACCAAGTCGACGATCGGTAGCCGACCTAAGAGGGCGGACGGCCACATTGGGACTGAGACACGGCCCAG	0	0	0	0	0	0	0	0	0	0	0	0	0	0	0	0	0	0	36	0	0	0	0	0	0	22	0	0	0	0	0	0	0	0	0	0	0	8	0	0	0	0	0	0	0	0	0	0
497	GATGAACGCTGGCGGCGTGCTTAACACATGCAAGTCGAACGAAGCACTTTATTTGATTTCCTTCGGGACTGATTATTTTGTGACTGAGTGGCGGACGGGTGAGTAACGCGTGGGTAACCTGCCTTGTACAGGGGGATAACAGTTGGAAACGGCTGCTAATACCGCATAAGCGCACAGTATCGCATGATGCAGTGTGAAAAACTCCGGTGGTATAAGATGGACCCGCGTTGGATTAGCTAGTTGGTGAGGTAACGGCCCACCAAGGCGACGATCCATAGCCGACCTGAGAGGGTGACCGGCCACATTGGGACTGAGACACGGCCCAA	0	0	0	0	0	0	0	0	0	0	0	0	0	0	0	0	0	0	0	0	0	0	0	0	0	0	0	0	0	0	0	0	0	0	0	0	0	0	0	0	0	0	0	0	0	0	0	0
498	ATTGAACGCTGGCGGCAGGCTTAACACATGCAAGTCGAACGGTAACATAAAGAAGCTTGCTTCTTTGATGACGAGTGGCGGACGGGTGAGTAATGCTTGGGAATCTAGCTTATGGAGGGGGATAACTATGGGAAACTGTAGCTAATACCGCGTAGAATCGGGAGATGAAAGTGTGGGACCTTCGGGCCACATGCCATAGGATGAGCCCAAGTGGGATTAGGTAGTTGGTGAGGTAAAGGCTCACCAAGCCGACGATCTCTAGCTGGTCTGAGAGGATGACCAGCCACACTGGGACTGAGACACGGCCCAG	0	0	0	0	0	0	0	0	0	0	0	0	0	0	0	0	0	0	0	0	0	0	0	0	0	0	0	0	0	0	0	0	0	0	0	0	0	0	0	0	0	0	0	0	0	0	0	0
499	GACGAACGCTGGCGGCGTGCTTAACACATGCAAGTCGAACGAGAGTTAGATCGAATGAGTTTTCGGACAAGTGAGATTTAACGAAAGTGGCGAACGGGTGAGTAACACGTGAGCAACCTGCCTTACACAGGGGGATAGCCATTGGAAACGGTGATTAATACCCCATAAGACCACAATACCGCATGGTAAAAGGGTAAAAGGGATACCGGTGTAAGATGGGCTCGCGTCTGATTAGCTAGTTGGTGGGGTAAAGGCCTACCAAGGCGACGATCAGTAGCCGGTCTGAGAGGATGAACGGCCACATTGGAACTGAGACACGGTCCAA	0	0	0	0	0	0	0	0	0	0	0	0	0	0	0	0	0	0	0	0	0	0	0	0	0	0	0	0	0	0	0	0	0	0	0	0	0	0	0	0	0	0	0	0	0	0	0	0
500	GATAAACGCTGGCGGCGTGCATAACACATGCAAGTCGAACGATGAAACTTAGATGATTTCTTCGGAATGAACTTAAGTGGATTAGTGGCGAACGGGTGAGTAACACGTGAGTAACCTGCCTTACACAAGGGGATAGCCTCTGGAAACGGAGAATAATACCCTATAAAGTCTAATCAGCCCATGCTGGAAAGACCAAAGATTTATCGGTGTAAGATGGACTTGCGTCTGATTAGCTAGTTGGTGAGATAAAAGCTCACCAAGGCGACGATCAGTAGCCGGCTTGAGAGAGTGTACGGCCACATTGGGACTGAGACACGGCCCAA	0	0	0	0	0	0	0	0	0	0	0	0	0	0	0	0	0	0	0	0	0	0	0	0	0	0	0	0	0	0	0	0	0	0	0	0	0	0	0	0	0	0	0	0	0	0	0	0
501	GATGAACGCTGGCGGCGTGCTTAACACATGCAAGTCGAACGAAGCACTTTATTTGATTTCTTCGGAATGAAGATTTTGTGACTGAGTGGCGGACGGGTGAGTAACGCGTGGGTAACCTGCCTCATACAGGGGGATAACAGTTGGAAACGACTGCTAATACCGCATAAGCGCACAGGGTCGCATGACCTGGTGTGAAAAACTCCGGTGGTATGAGATGGACCCGCGTCTGATTAGCCAGTTGGTGGGGTAACGGCCTACCAAAGCGACGATCAGTAGCCGACCTGAGAGGGTGACCGGCCACATTGGGACTGAGACACGGCCCAA	0	0	0	0	0	0	0	0	0	0	0	0	0	0	0	0	0	0	0	31	0	0	0	0	0	49	0	0	0	0	0	0	0	0	0	7	0	0	0	0	0	0	0	0	0	0	0	0
502	GACGAACGCTGGCGGCACGCTTAACACATGCAAGTCGAACGAGAGAAGAGAAGCTTGCTTTTCTGATCTAGTGGCGGACGGGTGAGTAACACGTGAGCAATCTGCCTTTCAGAGGGGGATACCGATTGGAAACGATCGTTAATACCGCATAACATAATTGAACCGCATGATTTGATTATCAAAGATTTATCGCTGAAAGATGAGCTCGCGTCTGATTAGCTAGTTGGTAAGGTAACGGCTTACCAAGGCGACGATCAGTAGCCGGACTGAGAGGTTGATCGGCCACATTGGGACTGAGACACGGCCCAG	0	0	0	0	0	0	0	0	0	0	0	0	0	0	0	0	0	0	0	52	0	0	0	0	0	40	0	0	0	0	0	0	0	0	0	0	0	0	0	0	0	0	0	0	0	0	0	0
503	GACGAACGCTGGCGGCGTGCTTAACACATGCAAGTCGAACGAGAGGACATGGGAAGCTTGCTTCCTATGAAATCGAGTGGCAAACGGGTGAGTAACGCGTAAACAACCTGCCCTTCGGATGGGGATAACAGCCGGAAACGGTTGCTAATACCGAATACGATCTTTTCGTCGCATGACGGAAAGAAGAAAGGATGGCCTCTATACAAAGCTATCGCCGAAGGAGGGGTTTGCGTCTGATTAGCTGGTTGGAGGGGTAACGGCCCAACAAGGCGATGATCAGTAGCCGGTCTGAGAGGATGAACGGCCACATTGGGACTGAGACACGGCCCAG	0	0	0	0	0	0	0	0	0	0	0	0	0	0	0	0	0	0	0	0	0	0	0	0	0	0	0	0	0	0	0	0	0	0	0	0	0	0	0	0	0	0	0	0	0	0	0	0
504	GATGAACGCTGGCGGCGTGCTTAACACATGCAAGTCGAACGGAAAGGCCCAAGCTTGCTTGGGTACTCGAGTGGCGAACGGGTGAGTAACACGTGGGTGATCTGCCCTGCACTTCGGGATAAGCCTGGGAAACTGGGTCTAATACCGGATAGGACCACATTTTGGATGGTGTGGTGGAAAGTTTTTCGGTGTGGGATGAGCTCGCGGCCTATCAGCTTGTTGGTGGGGTAATGGCCTACCAAGGCGTCGACGGGTAGCCGGCCTGAGAGGGTGTACGGCCACATTGGGACTGAGATACGGCCCAG	0	0	0	0	0	0	0	0	0	0	0	0	0	0	0	0	0	0	0	0	0	0	0	0	0	0	0	0	0	0	0	0	0	0	0	0	0	95	0	0	0	0	5	0	0	0	0	0
505	GACGAACGCTGGCGGCGTGCTTAACACATGCAAGTCGAACGATGAAGCGGGTGCTTGCACTCGTGGATTAGTGGCGAACGGGCGAGTAACACGTGAGTAACCTGTCCTTTTCTTTGGGATAACGGCTGGAAACGGCTGCTAATACTGGATATTCAGGCGTCACCGCATGGTGGTGTTTGGAAAGGTTTTTTCTGGGATTGGGTGGGCTCGCGGCCTATCAGCTTGTTGGTGGGGTGATGGCTTACCAAGGCTTTGACGGGTAGCCGGCCTGAGAGGGTGGTCGGTCGCACTGGGACTGAGATACGGCCCAG	0	0	0	0	0	0	0	0	0	0	0	0	0	0	0	0	0	0	0	0	0	0	0	0	0	0	0	0	752	0	0	0	0	0	0	0	0	37	0	0	0	0	34	0	0	0	61	4
506	ATTGAACGCTGGCGGCATGCCTTACACATGCAAGTCGAACGGTAACAGGTTAAGCTGACGAGTGGCGAACGGGTGAGTAATATATCGGAACGTGCCCAGTCGTGGGGGATAACTGCTCGAAAGAGCAGCTAATACCGCATACGACCTGAGGGTGAAAGCGGGGGATCGCAAGACCTCGCGCGATTGGAGCGGCCGATATCAGATTAGGTAGTTGGTGGGGTAAAGGCCCACCAAGCCAACGATCTGTAGCTGGTCTGAGAGGACGACCAGCCACACTGGGACTGAGACACGGCCCAG	0	0	0	0	0	0	0	0	0	0	0	0	0	0	0	0	0	0	0	0	0	0	0	0	0	0	0	0	0	0	0	0	0	0	0	0	0	0	0	0	0	0	0	0	0	0	0	0
507	AGCGAACGCTGGCGGCGTGCTTAACACATGCAAGTCGAGTGCGCGCCTGTAGCAATACAGGTGGCGCACGGCGCACGGGTGCGTAACACGTGGGTAACCTGCCCTTTGGTGGGGAATAACTTCGCGAAAGCGAAGCTAATTCCGCATAAGATCCGCAAGGATGAAAGCCGAAAGGCGCCGAAGGAGGGGCCCGCGCACGATTAGCTAGTTGGTAGGGTAACGGCCTACCAAGGCTATGATCGTTAGCTGGTCTGAGAGGATGGCCAGCCACACTGGAACTGAGACACGGTCCAG	0	0	0	0	0	0	0	0	0	0	0	0	0	307	0	143	0	0	0	0	0	0	0	0	0	0	0	0	0	0	0	0	0	0	0	0	0	0	0	0	0	0	0	0	0	0	0	0
508	GACGAACGCTGGCGGCGCGCTTAACACATGCAAGTCGAGCGATGAAATTTCAACAGATCCCTTCGGGGTGAAGATGAAATGGATTAGCGGCGGACGGGTGAGTAACACGTGAGTAACCTGCCTTAGACATTGGGATAGCCTCGGGAAACCGGGATTAATACCAAATGAAATCACATATGCACATGCATAAATGATCAAAGCTCCGGCGGTCTAAGATGGACTCGCGTCCCATTAGCTAGTTGGTGAGGTAACGGCCCACCAAGGCGACGATGGGTAGCCGGCCTGAGAGGGTGAACGGCCACATTGGAACTGAGAAACGGTCCAA	0	0	0	0	0	0	0	0	0	0	0	0	0	0	0	0	0	0	0	0	0	0	0	0	0	0	0	0	0	0	0	0	0	0	0	0	0	0	0	0	0	0	0	0	0	0	0	0
509	GATAAACGCTGGCGGCGTGCATAACACATGCAAGTCGAACGATGAAACTTAGCTGATTTCTTCGGAATGAAATTAAGTGGATTAGTGGCGAACGGGTGAGTAACACGTGAGTAACCTGCCTTACACAAGGGGATAGCCTTTGGAAACGAAGAATAATACCCTATAAAGTTAGTCAATCGCATGGTAGACTAACCAAAGATTTATCGGTGTAAGATGGACTTGCGTCTGATTAGCTAGTTGGTGAGATAAAAGCCCACCAAGGCGACGATCAGTAGCCGGCTTGAGAGAGTGTACGGCCACATTGGGACTGAGACACGGCCCAA	0	0	0	0	0	0	0	0	0	0	0	0	0	0	0	0	0	0	0	0	0	0	0	0	0	0	0	0	0	185	0	0	0	0	0	0	0	0	0	0	0	0	0	0	0	0	0	0
510	ATTGAACGCTGGCGGCAGGCTTAACACATGCAAGTCGAACGGTAACATAGAGAAGCTTGCTTCTTTGATGACGAGTGGCGGACGGGTGAGTAATGCTTGGGAATCTGGCTTATGGAGGGGGATAACTATGGGAAACTGTAGCTAATACCGCGTAATATCGAAAGATTAAAGTGTGGGACCTTAGGGCCACATGCCATAGGATGAGCCCAAGTGGGATTAGGTAGTTGGTGAGGTAAAGGCTCACCAAGCCGACGATCTCTAGCTGGTCTGAGAGGATGACCAGCCACACTGGGACTGAGACACGGCCCAG	0	0	0	0	0	0	0	0	0	0	0	0	0	0	0	0	0	0	0	0	0	0	0	0	0	0	0	0	0	0	0	0	0	0	0	0	0	0	0	0	0	0	0	0	0	0	0	0
511	GATGAACGCTAGCGGCAGGCTTAACACATGCAAGTCGAGGGGCAGCGGGGAGGAAGCTTGCTTTCTCCGCCGGCGACCGGCGCACGGGTGAGTAACACGTATGCAACCTGCCCCTGTCAGGGGGACAACCCGCCGAAAGGCGGGCTAAACCCGCGTACATGCCACCGGGGCATCCCGGAGGCAGGAAAGGCTTCGGCCGGACAGGGATGGGCATGCGGCGCATTAGGCAGTAGGCGGGGTAACGGCCCACCTAACCGACGATGCGTAGGGGTTCTGAGAGGAAGGTCCCCCACACTGGTACTGAGACACGGACCAG	0	0	0	0	0	0	0	0	0	0	0	0	0	14	0	0	0	0	0	31	0	0	0	0	0	72	0	0	0	0	0	0	0	0	0	0	0	0	0	0	0	0	0	0	0	0	0	0
512	GACGAACGCTGGCGGCGTGCCTAATACATGCAAGTCGAGCGGACGAATCGAAAGCTTGCTTTTGATTCGTTAGCGGCGGACGGGTGAGTAACACGTGGGCAACCTGCCCTGTAGACGGGGATAACACCGAGAAATCGGTGCTAATACCGGATAACACGAAATGTCGCATGACGTTTCGTTGAAAGACGGCGCAAGCTGTCGCTACAGGATGGGCCCGCGGCGCATTAGCTAGTTGGTGAGGTAACGGCTCACCAAGGCGACGATGCGTAGCCGACCTGAGAGGGTGATCGGCCACACTGGGACTGAGACACGGCCCAG	0	0	0	0	0	0	0	0	0	0	0	0	0	0	0	0	0	0	0	0	0	0	0	0	0	0	0	0	0	0	0	0	0	0	0	0	0	0	0	0	0	0	0	0	0	0	0	0
513	GACGAACGCTGGCGGCGCGCCTAACACATGCAAGTCGAACGGAGCTTAGAGAGCTTGCTTTTTAAGCTTAGTGGCGAACGGGTGAGTAACGCGTGAGTAACCTGCCCTAGAGTGGGGGACAACAGTTGGAAACGACTGCTAATACCGCATAAGCCCACGGTACCGCATGGCACTGAGGGAAAAGGATTTATTCGCTTTAGGATGGACTCGCGTCCAATTAGCTAGTTGGTGAGGTAACGGCCCACCAAGGCGACGATTGGTAGCCGGACTGAGAGGTTGAACGGCCACATTGGGACTGAGACACGGCCCAG	0	0	0	0	0	0	0	0	0	0	0	0	0	0	0	0	0	0	0	0	0	0	0	0	0	0	0	0	0	0	0	0	0	0	0	0	0	0	0	0	0	0	0	0	0	0	0	0
514	GATGAACGCCGGCGGTGTGCCTAATACATGCAAGTCGAGCGCACTGGCCCAACTGATATGACGTGCTTGCACTGAATTGACGTTGGATTCCCAGTGAGCGGCGGACGGGTGAGTAACACGTGGGCAACCTGCCCTGAAGCGGGGGATAACATCTGGAAACAGGTGCTAATACCGCATAACAACGAAAACCACATGGCTTTCGTTTCAAAGATGGTTTCGGCTATCACTTCAGGATGGGCCCGCGGTGCATTAGCTAGTTGGTAAGGTAACGGCTTACCAAGGCGATGATGCATAGCCGAGTTGAGAGACTAATCGGCCACAATGGAACTGAGACACGGTCCAT	0	0	0	0	0	0	0	0	0	0	0	0	0	0	0	0	0	0	0	0	0	0	0	0	0	0	0	0	0	0	0	0	0	0	0	0	0	0	0	0	0	0	0	0	0	0	0	0
515	AGCGAACGCTGGCGGCGTGCTTAACACATGCAAGTCGAACGTGAACGGGGTGACCCTAGTAAAGTGGCGCACGGGTGAGTAACACGTAGATAATCTACCTTGAAGTTCGGAATAACCTGTCGAAAGACGGGCTAATACTGGATAGAGCACGATGGTCATAAGGACTGTCATGGGAAAGGGAGCTCGTAAGAGCCCTCGCTTTAAGATGAGTCTGCGGCCCATTAGTTAGTTGGTGAGGTAATGGCTCACCAAGACTGTGATGGGTAGCTGGTCTGAGAGGATGATCAGCCACACTGGAACTGAAACACGGTCCAG	0	0	0	0	0	0	0	0	0	0	0	0	0	0	0	0	0	0	0	0	0	0	0	0	0	0	0	0	0	0	0	0	0	0	0	0	0	0	2	0	0	0	0	0	0	0	0	0
516	GACGAACGCTGGCGGCGCGCTTAACACATGCAAGTCGAGCGATGAAATCTTAACAGAACCTTTCGGGGCGAAGATAAGACGGATTAGCGGCGGACGGGTGAGTAACACGTGAGTAACCTGCCTTTTACACAGGGATAGCCTCGGGAAACCGGGATTAAAACCTGATGAAACTATCAAATCACATGATTAAGAAAGTTAAAACTCCGGTGGTAAAAGATGGACTCGCGTCCCATTAGCTAGTTGGTGAAGGTAACGGCCCACCAAGGCAACGATGGGTAGCCGGCCTGAGAGGGTGAACGGCCACATTGGAACTGAGAAACGGTCCAA	0	0	0	0	0	0	0	0	0	0	0	0	0	0	0	0	0	0	0	0	0	0	0	0	0	0	0	0	1014	0	0	0	0	0	0	0	0	0	0	0	0	0	0	0	0	0	0	0
517	ATTGAACGCTGGCGGCATGCTTTACACATGCAAGTCGGACGGCAGCGGAGGTGCTTGCACCTGCCGGCGAGTGGCGAACGGGTGAGTAACATATTGGAATGTACCGAGTAGTGGGGGATAACCAATCGAAAGATTGGCTAATACCGCATACGTCCTGAGGGGGGAAAGCAGGGGATCTTCGGACCTTGCGCTATTTGAGCAGCCAATATCTGATTAGCTAGTTGGTGGGGTAAAGGCCCACCAAGGCGACGATCAGTAGCGGGTCTGAGAGGATGATCCGCCACACTGGGACTGAGACACGGCCCAG	0	0	0	0	0	0	0	0	0	0	0	0	0	0	0	1032	0	0	0	0	0	0	0	0	0	0	0	0	0	0	0	0	0	0	0	0	0	0	0	0	0	0	0	0	0	0	0	0
518	GACGAACGCTGGCGGCGTGCCTAATACATGCAAGTCGAACGAACGGAGCTAGGAACTTGTTCCCGGCAAAGTTAGTGGCGCACGGGTGAGTAACACGTGGAGAACCTACCCTTTTGCGGGGGATAACCATTGGAAACGATGACTAATACCGCATAGAATCGCAGATCGCATGATCAACGAAGGAAAGACGGCTTCGGCTGTCACAAAAGGATGGCTCCGCGGTGCATTAGCTAGATGGTGGGGTAACGGCCTACCATGGCAATGATGCATAGCCGACCTGAGAGGGTGATCGGCCACATTGGGACTGAGACACGGCCCAA	0	0	0	0	2	0	0	0	0	0	0	0	0	0	0	0	0	0	0	0	0	0	0	0	0	0	0	0	0	0	0	0	0	0	0	0	0	0	0	0	0	0	0	0	0	0	0	0
519	GACGAACGCTGGCGGCGTGCTTAACACATGCAAGTCGAACGGGATTTAGTAGACAGAAACCTCGGTGGAAGATTACTAATGAGAGTGGCGAACGGGTGAGTAACGCGTGAGCAACCTGCCTATGACAGTGGGATAGCCTCGGGAAACCGGGATTAATACCGCATAAAATCGTAGAAACACATGTTTCAACGGTCAAAGATTTATCGGTCATAGATGGGCTCGCGTCTGATTAGCTAGTTGGTGAGATAACAGCCCACCAAGGCAACGATCAGTAGCCGGTCTGAGAGGATGAACGGCCACATTGGAACTGAGACACGGTCCAA	0	0	0	0	0	0	0	0	0	0	0	0	0	0	0	0	0	0	0	0	0	0	0	0	0	0	0	0	0	0	0	0	0	0	0	0	0	0	0	0	0	0	0	0	0	0	0	0
520	GACGAACGCTGGCGGCGTGCTTAACACATGCAAGTCGAACGGGATTTAGTAGACAGAAACCTCGGTGGAAGATTACTAATGAGAGTGGCGAACGGGTGAGTAACGCGTGAGCAACCTGCCTATGACAGTGGGATAGCCTCGGGAAACCGGGATTAATACCGCATAAAATCGTAGAAACACATGTTTCAACGATCAAAGATTTATCGGTCATAGATGGGCTCGCGTCTGATTAGCTAGTTGGTGAGATAACAGCCCACCAAGGCGACGATCAGTAGCCGGTCTGAGAGGATGAACGGCCACATTGGAACTGAGACACGGTCCAA	0	0	0	0	0	0	0	0	0	0	0	0	0	0	0	0	0	0	0	0	0	0	0	0	0	0	0	0	0	0	0	0	0	0	0	0	0	0	0	0	0	0	0	0	0	0	0	0
521	GATGAACGCTAGCTACAGGCTTAACACATGCAAGTCGAGGGGAAACGACATCGAAAGCTTGCTTTTGATGGGCGTCGACCGGCGCACGGGTGAGTAACGCGTATCCAACCTGCCCACCACTTGGGGATAACCTTGCGAAAGTAAGACTAATACCCAATGGTATCTCTAGAAGGCATCTGAAAGAGATTAAAGATTTATCGGTGATGGATGGGGATGCGTCTGATTAGCTTGTTGGCGGGGTAACGGCCCACCAAGGCAACGATCAGTAGGGGTTCTGAGAGGAAGGTCCCCCACATTGGAACTGAGACACGGTCCAA	0	0	0	0	0	0	0	0	0	0	0	0	0	0	0	0	0	0	0	0	0	0	0	0	0	0	0	0	0	0	0	0	0	0	0	0	0	0	0	0	0	0	0	0	0	0	0	0
522	GATAAACGCTGGCGGCGTGCATAACACATGCAAGTCGAACGATGAAGCTTAAATGATCTCTTCGGAGTGACCTTAAGTGGATTAGTGGCGGACGGGTGAGTAACGCGTGAGTAACCTGCCTTGCACAAGGGGATAGCCGTTGGAAACGACGAATAATACCCTATGATATGATAGTCTCGCATGAAGCTATCATCAAAGATTTATCGGTGTAAGATGGACTCGCGTCTGATTAGCTAGTTGGTGGGGTAACTGCTCACCAAGGCAACGATCAGTAGCCGGCTTGAGAGAGTGTACGGCCACATTGGGACTGAGACACGGCCCAG	0	0	0	0	0	0	0	0	0	0	0	0	0	0	0	0	0	0	0	0	0	0	0	0	0	0	0	0	0	0	0	0	0	0	0	0	0	0	0	0	0	0	0	0	0	0	0	0
523	ATTGAACGCTGGCGGCATGCCTTACACATGCAAGTCGAACGGCAGCACGGGAGCAATCCTGGTGGCGAGTGGCGAACGGGTGAGTAATACATCGGAACGTGCCCTGTAGTGGGGGATAACTAGTCGAAAGACTAGCTAATACCGCATACGACCTGAGGGTGAAAGTGGGGGACCGCAAGGCCTCATGCTATAGGAGCGGCCGATGTCTGATTAGCTAGTTGGTGGGGTAAAGGCCTACCAAGGCGACGATCAGTAGCTGGTCTGAGAGGACGATCAGCCACACGGGGACTGAGACACGGCCAAG	0	0	0	0	0	0	0	0	0	0	0	0	0	0	0	0	0	0	0	0	0	0	0	0	0	0	0	0	0	0	0	0	0	0	0	0	0	0	0	0	0	0	0	0	0	0	0	0
524	GACGAACGCTGGCGGCGTGCTTAACACATGCAAGTCGAACGGTAAGGCCCCTTCGGGGGTACACGAGTGGCGAACGGGTGAGTAACACGTGAGCAACCTGCCCTTGACTCTGGAATAACAGCTGGAAACAGCTGCTAATACCGGATACGACTCCTGCCGACATCGGCGGGAGTGGAAAGCTCCGGCGGTCAAGGATGGGCTCGCGGCCTATCAGCTAGTTGGTGAGGTAATGGCTCACCAAGGCTTCGACGGGTAGCCGGCCTGAGAGGGCGACCGGCCACACTGGGACTGAGATACGGCCCAG	0	0	0	0	0	0	0	0	0	0	0	0	0	0	0	0	0	0	0	0	0	0	0	0	0	0	0	0	0	0	0	0	0	0	0	0	0	0	0	0	0	0	0	0	0	0	0	0
525	AGCGAACGCTGGCGGCGTGCTTAACACATGCAAGTCGAACGTGAAATGTAGCAATACAGAGTAAAGTGGCGTACGGGTGAGTAACACGTGGGTAATCTACCAAAGAGTCTGGAATAACCGGCCGAAAGGCTGGCTAATACTGGATAGTTCAAGCGCACTGTAGAGGTGTGATTGGGAAAGGGAGCCGGTAACGGCCTTCGCTTTTTGATGAGCCCGCGTCTGATTAGCTAGTTGGTGAGGTAACGGCTCACCAAGGCGATGATCAGTAGCTGGTCTGAGAGGATGATCAGCCACACTGGAACTGAAACACGGTCCAG	0	0	0	0	0	0	0	0	0	0	0	0	0	0	0	0	0	0	0	0	0	0	0	0	0	0	0	0	0	0	3	0	0	0	0	0	0	0	0	0	0	0	0	0	0	0	0	0
526	GATGAACGCTAGCGGCAGGCTTAATACATGCAAGTCGAGGGGCAGCGGGAGTAGCAATACTTGCCGGCGACCGGCGCACGGGTGCGTAACACGTATGTAATCTGCCCTTCACTGGGGAATAGCCCGGAGAAATCCGGATTAATACCCCATAACAAATGAAACGGCATCGTTTTATTTTGAAAGAATTTCGGTGAAGGATGAACATGCGACTGATTAGTTAGTTGGTGAGGTAACGGCTCACCAAGACCACGATCAGTAGGGGTACTGAGAGGTTAAACCCCCACACTGGTACTGAGACACGGACCAG	0	0	0	0	0	0	0	0	0	0	0	0	0	0	0	0	0	0	0	0	0	0	0	0	0	0	0	0	0	0	0	0	0	0	0	0	0	0	0	0	0	0	0	0	0	0	0	0
527	GATGAACGCTGGCGGCGTGCCTAATACATGCAAGTCGAACGCTTTGTGGTTCAACTGATTTGAAGAGCTTGCTCAGATATGACGATGGACATTGCAAAGAGTGGCGAACGGGTGAGTAACACGTGGGAAACCTACCTCTTAGCAGGGGATAACATTTGGAAACAGATGCTAATACCGTATAACAATGACAACCGCATGGTTGTTATTTAAAAGATGGTTCTGCTATCACTAAGAGATGGTCCCGCGGTGCATTAGCTAGTTGGTAAGGTAATGGCTTACCAAGGCGATGATGCATAGCCGAGTTGAGAGACTGATCGGCCACAATGGGACTGAGACACGGCCCAT	0	0	0	0	0	0	0	0	0	0	0	0	0	0	0	0	0	0	0	14	0	0	0	0	0	0	0	0	0	0	0	0	0	0	0	0	0	0	0	0	0	0	0	0	0	0	0	0
528	ATTGAACGCTGGCGGCAGGCTTAACACATGCAAGTCGAGCGGGGGAGATTGCTTCGGTAATTGACCTAGCGGCGGACGGGTGAGTAATACTTAGGAATCTGCCTATTAATGGGGGACAACATCTCGAAAGGGATGCTAATACCGCATACGCCCTACGGGGGAAAGCAGGGGATCACTTGTGACCTTGCGTTAATAGATGAGCCTAAGTCGGATTAGCTAGTTGGTGGGGTAAAGGCCTACCAAGGCGACGATCTGTAGCGGGTCTGAGAGGATGATCCGCCACACTGGGACTGAGACACGGCCCAG	0	0	5	0	0	0	0	0	0	0	0	459	0	0	0	0	0	0	0	0	14	21	0	0	0	0	0	0	0	0	0	0	0	0	153	0	0	0	0	0	0	0	0	0	0	0	0	0
529	AGCGAACGCTGGCGGCGTGCCTAACACATGCAAGTCGAACGTGAAAAGGGGCAACCCTGAGTAAAGTGGCGTACGGGTGAGTAACACGTAGGTAATCTACCCCAGAGTCTGGAATAACCTGCCGAAAGGCGGGCTAATACTGGATAGAGCGACGGAATCCGTAATTGGATTTTTCGGGAAAGGGAGGACGTAAGTCCCTTCGCTTTGGGATGAGCCTGCGTCCCATTAGCTAGTTGGTAGGGTAATGGCCTACCAAGGCAATGATGGGTAGCTGGTCTGAGAGGATGATCAGCCACACTGGAACTGAAACACGGTCCAG	0	0	0	125	0	0	0	387	0	0	443	0	0	0	0	0	0	0	0	0	0	30	0	0	0	0	0	0	0	0	0	0	0	0	0	0	0	0	0	0	0	0	0	0	0	0	0	0
530	ATTGAACGCTGGCGGCGTGCCTAACACATGCAAGTCGAGCGGTAACAGGTGTAGCAATACATGCTGACGAGCGGCGAACGGGTGAGTAATGCTTCGGAATCTACCCATTGGCGGGGAATAACTAGCCGAAAGGTTAGCTAATACCGCATAAGCCCTACGGGGGAAAGCAGGGGATCGTAAGACCTTGCACCGATGGATGAGCCGAAGCCGGATTAGCTAGTTGGTAGGGTAACGGCCTACCAAGGCGACGATCCGTAGCTGGTCTGAGAGGACGACCAGCCACACTGGGACTGAGACACGGCCCAG	0	0	0	0	0	0	0	0	0	0	0	0	0	0	0	0	0	0	0	0	0	0	0	0	0	0	0	0	0	0	0	0	0	0	0	0	0	0	0	0	0	0	0	0	0	0	0	0
531	GATGAACGCTGGCGGCGTGCCTAATACATGCAAGTCGAGCGAACAGATAAGGAGCTTGCTCCTTTGACGTTAGCGGCGGACGGGTGAGTAACACGTGGATAACCTACCTATAAGACTGGGATAACTTCGGGAAACCGGAGCTAATACCGGATAAGATTTTGAACCGCATGGTTCAATAGTGAAAGACGGCCTTGCTGTCACTTATAGATGGATCCGCGCCGTATTAGCTAGTTGGTAAGGTAACGGCTTACCAAGGCAACGATACGTAGCCGACCTGAGAGGGTGATCGGCCACACTGAAACTGAGACACGGTCCAG	0	0	0	0	0	0	0	0	0	0	0	0	0	0	0	0	904	0	0	0	0	0	0	0	0	0	0	0	0	0	0	0	0	0	0	0	0	0	0	0	0	0	0	0	0	0	0	0
532	GACGAACGCTGGCGGCGTGCTTAACACATGCAAGTCGAACGCTGAAGCTTGGTGCTTGCACTTAGGTGGATGAGTGGCGAACGGGTGAGTAATACGTGAGTAACCTGCCCTTGACTCTGGGATAAGCCTGGGAAACTGGGTCTAATACTGGATATGACTTCCTGTCGCATGGTGGGGGGTGGAAAGGGTTTGTACTGGTTGTGGATGGGCTCACGGCCTATCAGCTTGTTGGTGGGGTAATGGCCTACCAAGGCGACGACGGGTAGCCGGCCTGAGAGGGTGACCGGCCACACTGGGACTGAGACACGGCCCAG	0	0	0	0	0	0	0	0	0	0	0	0	0	0	0	0	0	0	0	0	0	0	0	0	0	0	0	0	0	0	0	0	0	0	0	0	0	0	0	0	0	0	0	0	0	0	0	0
533	GATGAACGCTGGCGGCGTGCCTAATACATGCAAGTCGAGCGAATGGATTGAGAGCTTGCTCTCAAGAAGTTAGCGGCGGACGGGTGAGTAACACGTGGGTAACCTGCCCATAAGACTGGGATAACTCCGGGAAACCGGGGCTAATACCGGATAACATTTTGAACTGCATGGTTCGAAATTGAAAGGCGGCTTCGGCTGTCACTTATGGATGGACCCGCGTCGCATTAGCTAGTTGGTGAGGTAACGGCTCACCAAGGCAACGATGCGTAGCCGACCTGAGAGGGTGATCGGCCACACTGGGACTGAGACACGGCCCAG	0	0	0	0	0	0	0	0	0	0	0	0	0	0	0	0	0	0	0	0	0	0	0	0	0	0	0	0	0	0	0	0	0	0	0	0	0	0	0	0	0	0	0	0	0	0	0	0
534	GATGAACGCTGGCGGCGTGCCTAATACATGCAAGTCGAGCGAACAGATGAGGAGCTTGCTCCTCTGACGTTAGCGGCGGACGGGTGAGTAACACGTGGATAACCTACCTATAAGACTGGGATAACTACGGGAAACCGGAGCTAATACCGGATAATATATTGAACCGCATGGTTCAATAGTGAAAGACGGTTTTGCTGTCACTTATAGATGGATCCGCGCCGCATTAGCTAGTTGGTAAGGTAACGGCTTACCAAGGCAACGATGCGTAGCCGACCTGAGAGGGTGATCGGCCACACTGGAACTGAGACACGGTCCAG	0	0	0	0	0	0	0	0	0	0	0	0	0	0	0	0	0	0	0	0	0	0	0	0	0	0	0	0	0	0	0	0	0	0	0	0	0	0	0	0	0	0	0	0	0	0	0	0
535	GACGAACGCTGGCGGCGTGCCTAATACATGCAAGTAGAACGCTGAAGCTTGGTGCTTGCACCGAGCGGATGAGTTGCGAACGGGTGAGTAACGCGTAGGTAACCTGCCTGGTAGCGGGGGATAACTATTGGAAACGATAGCTAATACCGCATAAAATGGATTATCGCATGATAATTCATTGAAAGGTGCAAATGCATCACTACCAGATGGACCTGCGTTGTATTAGCTAGTTGGTGGGGTAACGGCTCACCAAGGCGACGATACATAGCCGACCTGAGAGGGTGATCGGCCACACTGGGACTGAGACACGGCCCAG	0	0	0	0	0	0	0	0	0	0	0	0	0	0	0	943	0	0	0	0	0	0	0	0	0	0	0	0	0	0	0	0	0	0	0	0	0	0	0	0	0	0	0	0	0	0	0	0
536	GACGAACGCTGGCGGCGTGCTTAACACATGCAAGTCGAACGCTGAAGCCTGGTGCTTGCACCGGGTGGATGAGTGGCGAACGGGTGAGTAATACGTGAGTGACCTGCCTTTGACTCTGGGATAAGCCTGGGAAACTGGGTCTAATACCGGATGCGACTACTGCCCGCATGGGCTGGTGGTGGAAAGGGTTATGTACTGGTCTTAGATGGGCTCACGGCCTATCAGCTGGTTGGTGGGGTAATGGCCTACCAAGGCGACGACGGGTAGCCGGCCTGAGAGGGTGACCGGCCACACTGGGACTGAGACACGGCCCAG	0	0	0	0	0	0	0	0	0	0	0	0	0	0	638	0	0	0	0	0	0	0	0	0	0	0	0	0	0	0	0	0	0	0	0	0	0	0	0	0	0	0	0	0	0	0	0	0
537	GACGAACGCTGGCGGCGCGCTTAACACATGCAAGTCGAGCGATGAAATTTTGACAGATCCCTTCGGGGTGAAGATAAAATGGATTAGCGGCGGACGGGTGAGTAACACGTGAGTAACCTGCCTTAGACATTGGGATAGCCTCGGGAAACCGGGATTAATACCGAATAAAATCATAGGTGCACATGCACTAATGATCAAAACTCCGGTGGTCTAAGATGGACTCGCGTCCCATTAGCTAGTTGGTAGGGTAACGGCCTACCAAGGCGACGATGGGTAGCCGGCCTGAGAGGGTGAACGGCCACATTGGAACTGAGAAACGGTCCAA	0	0	0	0	0	0	0	0	0	0	0	0	0	0	0	0	0	0	0	0	0	0	0	0	0	0	93	0	0	0	0	0	0	0	0	0	0	0	0	72	0	0	25	0	0	0	0	0
538	GATGAACGCTGGCGGCGTGCTTAACACATGCAAGTCGAACGAAACACCTTATTTGATTTTCTTCGGAACTGAAGATTTGGTGATTGAGTGGCGGACGGGTGAGTAACGCGTGGGTAACCTGCCCTGTACAGGGGGATAACAGTCAGAAATGACTGCTAATACCGCATAAGACCACAGCACCGCATGGTGCAGGGGTAAAAACTCCGGTGGTACAGGATGGACCCGCGTCTGATTAGCTGGTTGGTGAGGTAACGGCTCACCAAGGCGACGATCAGTAGCCGGCTTGAGAGAGTGAACGGCCACATTGGGACTGAGACACGGCCCAA	0	0	0	0	0	0	0	0	0	0	0	0	0	0	0	0	0	0	0	31	0	0	0	0	0	29	0	0	0	0	0	0	0	0	0	22	0	0	0	0	0	0	0	0	0	0	0	0
539	GATTAACGCTGGCGGCATGCCTAATACATGCAAATCGAACGAAGCCTTTTAGGCTTAGTGGTGAACGGGTGAGTAACACGTATCCAATCTACCCTTAAGTTGGGGATAACTAGTCGAAAGATTAGCTAATACCGAATAATAACATCAATATCGCATGAGAAGATGTAGAAAGTCGCTCTTTGTGGCGACGCTTTTGGATGAGGGTGCGACGTATCAGATAGTTGGTGAGGTAATGGCTCACCAAGGCAATGACGCGTAGCTGTACTGAGAGGTAGAACAGCCACAATGGGACTGAGACACGGCCCAG	0	0	0	0	0	0	0	0	0	0	0	0	0	0	0	0	0	0	0	0	0	0	0	0	0	0	0	0	0	0	0	0	0	0	0	0	0	0	0	0	86	194	0	0	216	0	0	0
540	AACGAACGTTAGCGGCGCGCCTAACACATGCAAGTCGCACGAGAAAGGGCTTCGGCCCCGGTACAGTGGCGCACGGGTGAGTAACACGTGGGTAATGTTCCCTCGGGCGGGGGATAACCTTCCGAAAGGAGGGCTAATACCGCATAAGACCACGGCCTCGAAAGGGGCTGAGGTCAAAGCAGGCCTCTTCATGAAAGCTTGCACCTGAGGATCAGCCCGCGGCCCATCAGCTAGTTGGCAGGGTAATGGCCTACCAAGGCTTAGACGGGTAGCTGGTCTGAGAGGATGATCAGCCACACTGGAACTGAGACACGGTCCAG	0	0	0	0	0	0	0	0	0	0	0	0	0	0	0	0	0	0	0	0	0	0	0	0	0	0	0	0	0	0	0	0	0	0	0	0	0	0	0	0	0	0	0	0	0	0	0	0
541	GACGAACGCTGGCGGCGTGCTTAACACATGCAAGTCGAACGGAAAGGCCCTGCTTGCAGGGTGCTCGAGTGGCGAACGGGTGAGTAACACGTGGGTGATCTGCCCCTTACTTTGGGATAAGCCTGGGAAACTGGGTCTAATACTGGATAGGACCATGCTGTAGGTGGTGTGGTGGAAAGATTAGTTTCGGTAAGGGATGAGCTCGCGGCCTATCAGCTTGTTGGTGGGGTAATGGCCTACCAAGGCGTCGACGGGTAGCCGGCCTGAGAGGGTGGACGGCCACATTGGGACTGAGATACGGCCCAG	0	0	0	0	0	0	0	0	0	0	0	0	0	0	0	0	0	0	0	0	0	0	0	0	0	0	0	0	0	0	0	0	0	0	0	0	0	0	0	0	0	0	0	0	0	0	0	0
542	GATGAACGCTAGCGGCAGGCTTAATACATGCAAGTCGTGGGGCAGCGCGGGTAGCAATACCTGGCGGCGACCGGCAAACGGGTGCGGAACACGTACGCAACCTTCCTTTAAGTGAGGAATAGCCCAGGGAAACTTGGATTAATACCTCGTAACATTATGAGATGGCATCATCTTATAATTATAGCTACGGCGCTTAAAGATGGGCGTGCGGCTGATTAGGTAGTTGGCGGGGTAATAGCCCACCAAGCCTACGATCAGTAACTGGTGTGAGAGCACGACCAGTCACACGGGCACTGAGACACGGGCCCG	0	0	0	0	0	0	0	0	0	0	0	0	0	0	0	0	0	0	0	0	0	0	0	0	0	0	0	8	0	0	0	0	0	0	0	0	0	0	0	0	0	0	0	0	0	0	0	0
543	GATGAACGCTAGCTATAGGCTTAACACATGCAAGTCGAGGGGAAACGGCAGAGAGTGCTTGCACACTTTGGACGTCGACCGGCGCACGGGTGAGTAACGCGTATCCAACCTGCCCTTTACTTGGGGATAACCCGTTGAAAGACGGACTAATACCCAATGATATTCATTGATGACATCTGACATGAATTAAAGATTTATCGGTATAGGATGGGGATGCGTCTGATTAGCTTGTTGGTGAGGTAACGGCTCACCAAGGCCACGATCAGTAGGGGTTCTGAGAGGAAGGTCCCCCACATTGGAACTGAGACACGGTCCAA	0	0	0	0	0	0	0	0	0	0	0	0	0	0	0	0	0	0	0	0	0	0	0	0	0	0	0	0	0	0	0	0	0	0	0	0	0	0	0	0	0	0	0	0	0	0	0	0
544	GATGAACGCTAGCGGGAGGCCTAACACATGCAAGCCGAGCGGTATTGTTTCTTCGGAAATGAGAGAGCGGCGTACGGGTGCGGAACACGTGTGCAACCTGCCTTTATCTGGGGGATAGCCTTTCGAAAGGAAGATTAATACTCCATAATATATTGAACGGCATCGTTTAATATTGAAAGCTCCGGCGGATAGAGATGGGCACGCGCAAGATTAGCTAGTTGGTGAGGTAACGGCTCACCAAGGCGATGATCTTTAGGGGGCCTGAGAGGGTGATCCCCCACACTGGTACTGAGACACGGACCAG	0	0	0	0	0	0	0	0	0	0	0	0	0	0	0	0	0	0	0	0	0	0	0	0	0	4	0	0	0	0	0	0	0	0	0	0	0	0	0	194	0	0	0	0	0	0	0	0
545	GACGAACGCTGGCGGTGTGCTTAACACATGCAAGTGGAGCGACGAACCAGGGCTTGCCCTGGGGCAGAGCCGCGAACGGGTGAGTAACACGTGGGTAACGTACCCCGATCACCGGGACAACCCGAGGAAACTCGGGCTAATACCGGATGTGTCCGTGAATCATGAGGTTCACGTGCAAAGGAAGCTTCGGCCTCCGGATCGGGAGCGGCCCGCGGCCCATTAGTTAGTTGGTGGGGTAATGGCCTACCAAGACCGCGATGGGTAGCTGGTCTGAGAGGACGATCAGCCACACTGGGACTGAGACACGGCCCAG	0	0	0	0	0	0	0	0	0	0	0	0	0	0	0	0	0	0	0	0	0	0	0	0	0	0	0	0	0	0	0	0	0	0	0	0	0	0	0	0	0	0	0	0	0	0	0	0
546	GATGAACGCTGGCGGCGTGCTTAACACATGCAAGTCGAACGAAGCACTTTATTTGATTTCCTTCGGGACTGATTATTTTGTGACTGAGTGGCGGACGGGTGAGTAACGCGTGGGTAACCTGCCTTGTACAGGGGGATAACAGTTGGAAACGGCTGCTAATACCGCATAAGCGCACAGTATCGCATGATGCAGTGTGAAAAACTCCGGTGGTATAAGATGGACCCGCGTTGGATTAGCTAGTTGGTGAGGTAACGGCCCACCAAGGCAACGATCCATAGCCGACCTGAGAGGGTGACCGGCCACATTGGGACTGAGACACGGCCCAA	0	0	0	0	0	0	0	0	0	0	0	0	0	0	0	0	0	0	0	0	0	0	0	0	0	0	0	0	0	0	0	0	0	0	0	0	0	0	0	0	0	0	0	0	0	0	0	0
547	GACGAACGCTGGCGGCGTGCCTAATACATGCAAGTAGAACGCTGAAGGAGGAGCTTGCTTCTCTGGATGAGTTGCGAACGGGTGAGTAACGCGTAGGTAACCTGCCTGGTAGCGGGGGATAACTATTGGAAACGATAGCTAATACCGCATAATATTGACTATTGCATGATAGTCAATTAAAAGGTGCAATTGCATCACTACCAGATGGACCTGCGTTGTATTAGCTAGTTGGTGGGGTAACGGCTCACCAAGGCGACGATACATAGCCGACCTGAGAGGGTGATCGGCCACACTGGGACTGAGACACGGCCCAG	0	0	0	0	0	0	0	0	0	0	0	0	0	0	0	0	0	0	0	307	0	0	0	0	0	101	0	0	0	0	0	0	0	0	0	0	0	0	0	0	0	0	0	0	0	0	0	0
548	ATTGAACGCTGGCGGAATGCTTTACACATGCAAGTCGAGCGGCAGCGCGGGGCAACCTGGCGGCGAGCGGCGAACGGGTGAGTAATACATCGGAACGTGCCCAGACGTGGGGGATAACTACTCGAAAGAGTAGCTAATACCGCATATGATCTAAGGATGAAAGCGGGGGATCGCAAGACCTCGCGCGTTTGGAGCGGCCGATGGCAGATTAGGTAGTTGGTGGGGTAAAGGCTTACCAAGCCTGCGATCTGTAGCTGGTCTGAGAGGACGACCAGCCACACTGGGACTGAGACACGGCCCAG	0	0	0	0	0	0	0	0	0	0	0	0	0	0	0	499	0	0	0	0	0	0	0	0	0	0	0	0	0	0	0	0	0	0	0	0	0	0	0	0	0	0	0	0	0	0	0	0
549	GATGAACGCTAGCTACAGGCTTAACACATGCAAGTCGAGGGGAAACGACATCGAAAGCTTGCTTTTGATGGGCGTCGACCGGCGCACGGGTGAGTAACGCGTATCCAACCTGCCCACCACTTGGGGATAACCTTGCGAAAGTAAGACTAATACCCAATGATATCTCTAGAAGACATCTGAAAGAGATTAAAGATTTATCGGTGATGGATGGGGATGCGTCTGATTAGCTTGTTGGCGGGGTAACGGCCCACCAAGGCGACGATCAGTAGGGGTTCTGAGAGGAAGGTCCCCCACATTGGAACTGAGACACGGTCCAA	0	0	0	0	0	0	0	0	0	0	0	0	0	0	0	0	0	0	0	70	0	0	0	0	0	0	0	0	0	0	0	0	0	0	0	0	0	0	0	0	0	0	0	0	0	0	0	0
550	ATTGAACGCTGGCGGCGTGCCTAACACATGCAAGTCGAGCGGTAACGCGGGGGCAACCCTGGCGACGAGCGGCGAACGGGTGAGTAATGTTTCGGAATCTACCCATGGGTGGGGAATAACCAGCCGAAAGGTTGGCTAATACCGCATAAGTCCGAGAGGGGAAAGCGGGGGATCGCAAGACCTCGCGCCGATGGATGAGCCGAAACCGGATTAGCTAGTTGGTAGGGTAAAGGCCTACCAAGGCGACGATCCGTAGCTGGTCTGAGAGGACGACCAGCCACACTGGGACTGAGACACGGCCCAG	0	0	0	0	0	0	0	0	0	0	0	0	0	0	0	0	0	0	0	0	0	0	0	0	0	0	0	299	0	0	0	0	0	0	0	0	0	0	0	0	0	0	0	0	0	0	0	0
551	ATTGAACGCTGGCGGCAGGCTTAACACATGCAAGTCGAACGGTAACATAAAGAAGCTTGCTTCTTTGATGACGAGTGGCGGACGGGTGAGTAATGCTTGGGAATCTAGCTTATGGAGGGGGATAACTACGGGAAACTGTAGCTAATACCGCGTAGAATCGAGAGATGAAAGTGTGGGACCTTCGGGCCACATGCCATAGGATGAGCCCAAGTGGGATTAGGTAGTTGGTGAGGTAAAGGCTCACCAAGCCGACGATCTCTAGCTGGTCTGAGAGGATGACCAGCCACACTGGGACTGAGACACGGCCCAG	0	0	0	0	0	0	0	199	0	0	0	0	0	0	0	0	0	0	0	0	0	0	0	0	0	0	0	0	0	0	0	0	0	0	0	0	0	0	0	0	0	0	0	0	0	0	0	0
552	GACGAACGCTGGCGGCGTGCCTAATACATGCAAGTTGAGCGCTGAAGGGAGGTACTTGTACCTTTTGGAAGAGCAGCGAACGGGTGAGTAACGCGTGGGGAATCTGCCTTTGAGCGGGGGACAACATTTGGAAACGAATGCTAATACCGCATAAAAGCTTTAAACATAAGTTAAAAGTTTGAAAGATGCAAAAGCATCACTCAAAGATGATCCCGCGTTGTATTAGCTAGTTGGTAGGGTAAAGGCCTACCAAGGCGATGATACATAGCCGACCTGAGAGGGTGATCGGCCACATTGGGACTGAGACACGGCCCAA	0	0	0	0	0	0	0	0	0	0	0	0	0	0	0	0	0	0	0	0	0	0	0	0	0	0	0	0	0	0	0	0	0	0	0	0	0	0	0	0	58	0	0	0	0	0	0	0
553	GACGAACGCTGGCGGCGTGCCTAATACATGCAAGTAGAACGCTGAAGAGAGGAGCTTGCTCTTCTTGGATGAGTTGCGAACGGGTGAGTAACGCGTAGGTAACCTGCCTTGTAGCGGGGGATAACTATTGGAAACGATAGCTAATACCGCATAACAATGGATGACACATGTCATTTATTTGAAAGGGGCAATTGCTCCACTACAAGATGGACCTGCGTTGTATTAGCTAGTAGGTGAGGTAACGGCTCACCTAGGCAACGATACATAGCCGACCTGAGAGGGTGATCGGCCACACTGGGACTGAGACACGGCCCAG	0	0	0	0	0	0	0	0	0	0	0	0	0	0	924	0	0	0	0	0	0	0	0	0	0	0	0	0	0	0	0	0	0	0	0	0	0	0	0	0	0	0	0	0	0	0	0	0
554	GATGAACGCTGGCGGCGTGCCTAATACATGCAAGTCGAGCGAACAGACGAGGAGCTTGCTCCTCTGACGTTAGCGGCGGACGGGTGAGTAACACGTGGATAACCTACCTATAAGACTGGGATAACTTCGGGAAACCGGAGCTAATACCGGATAATATATTGAACCGCATGGTTCAATAGTGAAAGACGGTTTTGCTGTCACTTATAGATGGATCCGCGTCGCATTAGCTAGTTGGTAAGGTAACGGCTTACCAAGGCAACGATGCGTAGCCGACCTGAGAGGGTGATCGGCCACACTGGAACTGAGACACGGTCCAG	0	0	0	0	0	0	0	0	0	0	0	0	0	0	0	513	0	0	0	0	0	0	0	0	0	0	0	0	0	0	0	0	0	0	0	0	0	0	0	0	0	0	0	0	0	0	56	0
555	GATTAACGCTGGCGGCGTGCATAACACATGCAAGTCGAACGATGAAAGCTAAATGATTTCTTCGGAATGATTTTAGCCGGATTAGTGGCGGACGGGTGAGTAACGCGTGAGTAACCTGCCTTAGAGAAGGGGATAGCCTTTGGAAACGAAGAATAATACCCTATAACACCAACACCTCGCATGAAGAGTTGGTCAAAGATTTATCGCTCTAAGATGGACTTGCGTCTGATTAGTTAGTTGGTGAGGTAACGGCCCACCAAGACAGCGATCAGTAGCCGGCTTGAGAGAGTGTACGGCCACATTGGGACTGAGACACGGCCCAG	0	0	0	0	0	0	0	0	0	0	0	0	0	0	0	0	0	0	0	0	0	0	0	0	0	0	0	0	0	0	0	0	0	0	0	0	0	0	0	0	0	0	0	0	0	0	0	0
556	GATGAACGCTAGCGATAGGCTTAACACATGCAAGTCGAGGGGTAACATGGAGAGAAGCTTGCTTCACTCTGATGACGACCGGCGGATGGGTGAGTAACGCGTATGCAACTTGCCTCTTAGTGGGGGATAACCCGGAGAAATCCGGACTAATACCGCATATTCTTAATTTCTCGCATGAGTTATTAAGGAAAGATTTATTGCTAAGAGATAGGCATGCGTTCCATTAGTTAGTTGGTGAGGTAACGGCTCACCAAGGCATCGATGGATAGGGGAGCTGAGAGGCTGATCCCCCACATTGGGACTGAGACACGGCCCAA	0	0	0	0	0	0	101	0	0	0	0	0	0	0	0	0	0	0	0	0	0	0	0	0	0	0	0	0	0	0	0	0	0	0	0	0	0	0	0	0	0	0	0	0	0	0	0	0
557	GACGAACGCTGGCGGCGTGCCTAATACATGCAAGTAGAACGCTGAAGAGAGGAGCTTGCTCTTCTTGGATGAGTTGCGAACGGGTGAGTAACGCGTAGGTAACCTGCCTTGTAGCGGGGGATAACTATTGGAAACGATAGCTGATACCGCATAACAATGGATGACACATGTCATTTATTTGAAAGGGGCAATTGCTCCACTACAAGATGGACCTGCGTTGTATTAGCTAGTAGGTGAGGTAACGGCTCACCTAGGCGACGATACATAGCCGACCTGAGAGGGTGATCGGCCACACTGGGACTGAGACACGGCCCAG	0	0	0	0	0	0	0	0	0	0	0	0	0	0	0	0	0	0	0	0	0	0	0	0	0	0	0	0	0	0	0	0	0	0	0	0	0	0	0	0	0	0	0	0	0	0	0	0
558	GACGAACGCTGGCGGCGCGCCTAACACATGCAAGTCGAGCGATGAAATTTTAACCGATCTCTTCGGAGAGAAGATAAAATGGATTAGCGGCGGACGGGTGAGTAACACGTGAGAAACCTGCCTTTCACAAGGGGATAGCCTCGGGAAACCGGGATTAATACCCTATGACACATTTCCTTCGCATGGAAGAAATGTTAAAACTCCGGTGGTGAAAGATGGTCTCGCGCCTGATTAGCTAGTTGGTGGGGTAACGGCCCACCAAGGCCATGATCAGTAACCGGCCTGAGAGGGTGAACGGTCACATTGGAACTGAGACACGGTCCAA	0	0	0	0	0	0	0	0	0	0	0	0	0	0	0	0	0	0	0	0	0	0	0	0	0	0	0	0	0	0	0	0	0	0	0	0	0	3	0	0	0	0	23	0	0	0	0	0
559	ATTGAACGCTGGCGGCAGGCTTAACACATGCAAGTCGAACGGTAACATAAAGAAGCTTGCTTCTTTGATGACGAGTGGCGGACGGGTGAGTAATGCTTGGGAATCTAGCTTATGGAGGGGGATAACTACGGGAAACTGTAGCTAATACCGCGTAGTATCGGAAGATGAAAGTGTGGGACCTTCGGGCCACATGCCATAGGATGAGCCCAAGTGGGATTAGGTAGTTGGTGAGGTAAAGGCTCACCAAGCCGACGATCTCTAGCTGGTCTGAGAGGATGACCAGCCACACTGGGACTGAGACACGGCCCAG	0	0	0	0	0	0	0	0	0	0	0	0	0	0	0	0	0	0	0	48	0	0	0	0	0	0	0	0	0	0	0	0	0	0	0	0	0	0	0	0	0	0	0	0	0	0	0	0
560	ATTGAACGCTGGCGGCATGCCTAACACATGCAAGTCGAACGGCAGCACAGTAGAGCTTGCTCTATGGGTGGCGAGTGGCGGACGGGTGAGTAATGCATCGGGATCTACCCAAACGTGGGGGATAACGTAGGGAAACTTACGCTAATACCGCATACGTCTTACGAGAGAAAGCAGGGGACCTTCGGGCCTTGCGCGGTTGGACGAACCGATGTGCGATTAGCTAGTTGGTAGGGTAATGGCCTACCAAGGCGACGATCGCTAGCTGGTCTGAGAGGATGATCAGCCACACTGGAACTGAGACACGGTCCAG	0	0	0	0	0	0	0	0	0	0	0	0	0	0	0	309	0	0	0	0	0	0	0	0	0	0	0	0	0	0	0	0	0	248	0	0	0	0	0	0	0	0	0	0	0	0	0	0
561	GACGAACGCTGGCGGCGCGCTTAACACATGCAAGTCGAGCGATGAAATTTTGACAGATCCCTTCGGGGTGAAGATAAAATGGATTAGCGGCGGACGGGTGAGTAACACGTGAGTAACCTGCCTTAGACATTGGGATAGCCTCGGGAAACCGGGATTAATACCGAATAAAATCACAGATACACATGTATCCATGATCAAAACTCCGGTGGTCTAAGATGGACTCGCGTCCCATTAGCTAGTTGGTGAGGTAACGGCCCACCAAGGCGACGATGGGTAGCCGGCCTGAGAGGGTGAACGGCCACATTGGAACTGAGAAACGGTCCAA	0	0	0	145	8	0	51	0	0	0	0	0	0	0	0	0	0	0	0	0	0	0	0	0	0	0	0	0	0	0	0	0	0	0	0	0	0	0	0	0	0	0	31	0	0	0	0	0
562	GATGAACGCTGGCGGCATGCCTAATACATGCAAGTCGAACGAGAGGAAGGAAAGCTTGCTTTCTTGAATCTAGTGGCGAACGGGTGAGTAACACGTAGGTAACCTGCCCATGTGCCCGGGATAACTTCTGGAAACGGATGCTAAAACCGGATAGGTAGCAGACAAGCATTTGACTGCTATTAAAGTGGCTAAGGCCATGAACATGGATGGACCTGCGGTGCATTAGCTAGTTGGTGAGGTAACGGCCCACCAAGGCGACGATGCATAGCCGGCCTGAGAGGGCGGACGGCCACATTGGGACTGAGACACGGCCCAA	0	0	0	0	0	0	0	0	0	0	0	0	0	0	0	0	0	0	0	0	0	0	0	0	0	0	0	760	0	0	0	0	0	0	0	0	0	0	0	0	0	0	0	0	0	0	0	0
563	GACGAACGCTGGCGGCGTGCCTAATACATGCAAGTAGAACGCTGAGGTTTGGTGTTTACACTAGACTGATGAGTTGCGAACGGGTGAGTAACGCGTAGGTAACCTGCCTCATAGCGGGGGATAACTATTGGAAACGATAGCTAATACCGCATAAGAGTAATTAACACATGTTAGTTATTTAAAAGGAGCAATTGCTTCACTGTGAGATGGACCTGCGTTGTATTAGCTAGTTGGTGAGGTAAAGGCTCACCAAGGCGACGATACATAGCCGACCTGAGAGGGTGATCGGCCACACTGGGACTGAGACACGGCCCAG	0	0	0	0	0	0	0	0	0	0	0	0	0	0	0	0	0	0	0	0	0	0	0	0	0	0	0	0	0	0	0	0	0	0	0	0	0	0	0	0	0	0	0	0	0	0	0	0
564	GATGAACGCTAGCTACAGGCTTAACACATGCAAGTCGAGGGGCAGCATGGTCTTAGCTTGCTAAGGCCGATGGCGACCGGCGCACGGGTGAGTAACACGTATCCAACCTGCCGTCTACTCTTGGACAGCCTTCTGAAAGGAAGATTAATACAAGATGGCATCATGAGTTCACATGTTCACATGATTAAAGGTATTCCGGTAGACGATGGGGATGCGTTCCATTAGATAGTAGGCGGGGTAACGGCCCACCTAGTCTTCGATGGATAGGGGTTCTGAGAGGAAGGTCCCCCACATTGGAACTGAGACACGGTCCAA	0	0	0	0	0	0	0	0	0	0	0	0	0	0	0	0	28	0	0	0	0	0	0	0	0	50	0	0	0	0	0	0	0	0	0	0	0	0	0	0	0	0	0	0	0	0	0	0
565	ATTGAACGCTGGCGGCATGCTTAACACATGCAAGTCGAACGGCAGCACAGCCTAGCACTAAGATGTTTCGAAGAGACGTTTTAGTGCTAGGTGGGTGGCGAGTGGCGGACGGGTGAGTAACGCGTAGGAATCTGCCTTGTAGAGGGGGACAACCCGGGGAAACTCGGGCTAATACCGCATATAATCGAGAGATGAAAGGATGGGACCTTCGGGCCATTCGCTACAAGAGGAGCCTGCGTTGGATTAGCTAGTTGGTGGGGTAAAGGCCTACCAAGGCGACGATCCATAGCTGGTCTGAGAGGATGACCAGCCACACTGGGACTGAGACACGGCCCAG	0	0	0	0	0	0	0	0	0	0	0	0	0	0	0	0	0	0	0	0	0	0	0	0	0	0	0	0	0	0	0	0	0	0	0	0	0	0	0	0	0	0	0	0	0	0	0	0
566	GACGAACGCTGGCGGCGTGCTTAACACATGCAAGTCGAACGATGAAGCTTGGTGCTTGCACTGGGTGGATTAGTGGCGAACGGGTGAGTAACACGTGAGTAACCTGCCCTTTACTTCGGGATAAGCTTGGGAAACTGGGTCTAATACCGGATATTCTGCATGGTCGGATGGTTGTGTAGGAAAGATTTTTTGGTAAGGGATGGGCTCGCGGCCTATCAGTTTGTTGGTGGGGTGATGGCCTACCAAGACGACGACGGGTAGCCGGCCTGAGAGGGCGACCGGCCACACTGGGACTGAGACACGGCCCAG	0	0	0	0	0	0	0	0	0	0	0	0	0	0	0	0	0	0	0	0	0	0	0	0	0	0	0	0	0	0	0	0	0	0	0	0	0	0	0	0	0	0	0	0	0	0	0	0
567	GACGAACGCTGGCGGCATGCCTAATACATGCAAGTCGAACGATGACGTCACTGCTTGCAGTGACTGATTAGTGGCGAACGGGTGAGTAACACGTGAGGAACTTGCCCATGAGCGGGGGACAACATTCGGAAACGGATGCTAATACCCCATAGGTGGATTGGTCGCATGACGAATTCATTAAAGGTGGCTTTGCTACCACTCATGGATAGCCTCGCGGCGTATTAGCTAGTTGGTAAGGTAATGGCTTACCAAGGCAGTGATACGTAGCCGACTTGAGAGGGTGATCGGCCACACTGGGACTGAGACACGGCCCAG	0	0	0	0	0	0	0	0	0	0	0	0	0	0	111	0	0	0	0	0	0	0	0	0	0	0	0	0	0	0	0	0	0	0	0	0	0	0	0	0	0	0	0	0	0	0	0	0
568	GACGAACGCTGGCGGCGTGCTTAACACATGCAAGTCGAACGGAAAGGCCTCTGCTTGCAGAGGTACTCGAGTGGCGAACGGGTGAGTAACACGTGGGTGATCTGCCTTGCACTTCGGGATAAGCCTGGGAAACTGGGTCTAATACCGGATAGGACCATGCTTTAGTGTGTGTGGTGGAAAGTTTTTCGGTGCAAGATGAGCCCGCGGCCTATCAGCTTGTTGGTGGGGTAATGGCCTACCAAGGCGACGACGGGTAGCCGGCCTGAGAGGGTGTACGGCCACATTGGGACTGAGACACGGCCCAG	0	0	0	0	0	0	0	0	0	0	0	0	0	0	0	0	0	0	0	0	0	0	0	0	0	0	0	0	0	0	0	0	0	0	0	0	0	0	0	0	0	0	0	0	0	893	0	0
569	AACGAACGCTGGCGGTGCGTCTTAAGCATGCAAGTCGAACGGTAAGAGGAGAGCTTGCTCTTCTCCTAGAGTGGCGGACTGGTGAGTAACGCGTGGATGATCTACCTTTGAGATGGGGATAGCTTCTAGAAATAGGAGGTAATACCGAATAACCTTATTATGTTATGATATAGTAAGAAAAGGAGCGTTAGCTCCGCTTAAAGATGAGTCTGCGTCCCATTAGCTAGTTGGTAAGGTAAAGGCCTACCAAGGCGACGATGGGTATCCGGCCTGAGAGGGTGAACGGACACATTGGGACTGAGATACGGCCCAA	0	0	0	0	0	0	0	0	0	0	0	0	0	0	0	891	0	0	0	0	0	0	0	0	0	0	0	0	0	0	0	0	0	0	0	0	0	0	0	0	0	0	0	0	0	0	0	0
570	GACGAACGCTGGCGGCGTGCTTAACACATGCAAGTCGAACGGGATTTAGTAGACAGAAGCCTCGGCGGAAGATTACTAATGAGAGTGGCGAACGGGTGAGTAACGCGTGAGCAACCTGCCTATGACAGTGGGATAGCCTCGGGAAACCGGGATTAATACCGCATAAAATCGTAGAAACACATGTTTTAACGGTCAAAGATTTATCGGTCATAGATGGGCTCGCGTCTGATTAGCTAGTTGGTGAGATAACAGCCCACCAAGGCGACGATCAGTAGCCGGTCTGAGAGGATGAACGGCCACATTGGAACTGAGACACGGTCCAA	0	0	0	0	0	0	0	0	0	0	0	0	0	0	0	0	0	0	0	0	0	0	0	0	0	0	0	0	0	0	0	0	0	0	0	0	338	143	0	0	0	0	0	52	0	0	0	0
571	GATGAACGCTGGCGGCGTGCCTAATACATGCAAGTCGAGCGAACAGATAAGGAGCTTGCTCCTTTGACGTTAGCGGCGGACGGGTGAGTAACACGTGGGTAACCTACCTATAAGACTGGGATAACTTCGGGAAACCGGAGCTAATACCGGATAATATTTCAAACCGCATGGTTCGATAGTGAAAGATGGTTTTGCTATCACTTATAGATGGACCCGCGCCGTATTAGCTAGTTGGTAAGGTAACGGCTTACCAAGGCAACGATACGTAGCCGACCTGAGAGGGTGATCGGCCACACTGGAACTGAGACACGGTCCAG	0	0	0	0	0	0	0	0	0	0	0	0	0	0	0	0	0	0	0	0	0	0	0	0	0	0	0	0	0	0	0	0	0	0	0	0	0	0	0	0	0	0	0	0	0	0	0	0
572	AACGAACGCTGGCGGCAGGCTTAACACATGCAAGTCGAACGCCCCGCAAGGGGAGTGGCAGACGGGTGAGTAACGCGTGGGAATCTACCGTACCCTACGGAATAACGCATGGAAACGTGTGCTAATACCGTATACGCCCTACGGGGGAAAGATTTATCGGGGTATGATGAGCCCGCGTTGGATTAGCTAGTTGGTGGGGTAAAGGCCTACCAAGGCGACGATCCATAGCTGGTCTGAGAGGATGATCAGCCACATTGGGACTGAGACACGGCCCAA	0	0	0	0	0	0	0	0	0	0	0	0	0	0	0	0	0	0	0	0	0	0	0	0	0	0	0	0	0	0	0	0	0	0	0	0	0	0	0	0	0	0	0	0	0	0	0	0
573	GATGAACGCTAGCTACAGGCTTAACACATGCAAGTCGAGGGGCAGCATTTTTATAGCAATATAAAAGATGGCGACCGGCGCACGGGTGAGTAACACGTATCCAACCTGCCGATAACTCGGGGATAACCCTTCGAAAGAAGGCCTAATACCCGATGGCATATCCCTTCCGCCTGGTGGGGATATTAAAGAACTTCGGTTATCGATGGGGATGCGTTCCATTAGCTTGTTGGCGGGGTAACGGCCCACCAAGGCATCGATGGATAGGGGTTCTGAGAGGAAGGTCCCCCACATTGGAACTGAGACACGGTCCAA	0	0	0	0	0	0	0	0	0	0	0	0	0	0	0	0	0	0	0	0	0	0	0	0	0	0	0	882	0	0	0	0	0	0	0	0	0	0	0	0	0	0	0	0	0	0	0	0
574	GATGAACGCTGGCGGCGTGCCTAACACATGCAAGTCGAGCGATGAAGTTTCCTTCGGGAAATGGATTAGCGGCGGACGGGTGAGTAACACGTGGGTAACCTGCCTCATAGTGGGGGATAGCCTTCCGAAAGGGAGATTAATACCGCATAACATCATTAGATGGCATCATTTAGTGATCAAAGGATTTATTCGCTATGAGATGGACCCGCGTCGCATTAGCTAGTTGGTAGGGTAATGGCTTACCAAGGCGACGATGCGTAGCCGACCTGAGAGGGTGATCGGCCACATTGGGACTGAGACACGGCCCAG	0	0	0	0	0	0	0	0	0	0	0	0	0	0	0	0	0	0	0	0	0	0	0	0	0	0	0	0	0	0	0	0	0	0	0	0	0	0	0	0	0	0	0	0	0	0	0	0
575	AACGAACGTTGGCGGCGCGCCTAACACATGCAAGTCGCACGAGAAAGGGAGCAATCCCCGGTACAGTGGCGCACGGGTGAGTAACACGTGGATAATCTTCCCGCGAGTGGGGGATAACCTTCCGAAAGGAGGGCTAATACCGCATAAGACCACGGAGAGTTCGCTCTCTGAGGTCAAAGCTGGCCTCTTCATGAAAGCTAGCGCTTGTGGATGAGTCCGCGGCCCATCAGCTAGTAGGTGGGGTAAAAGCCTACCTAGGCAAAGACGGGTAGCTGGTCTGAGAGGATGATCAGCCACACTGGAACTGAGACACGGTCCAG	0	0	2	0	0	0	0	0	0	0	0	0	0	0	0	0	0	0	0	0	0	0	0	0	0	0	0	0	0	0	0	339	0	0	0	0	0	0	0	0	0	0	0	0	0	0	0	0
576	GATGAACGCTAGCTACAGGCTTAACACATGCAAGTCGAGGGGCAGCATTTTAGTTTGCTTGCAAACTGAAGATGGCGACCGGCGCACGGGTGAGTAACACGTATCCAACCTGCCGATAACTCCGGGATAGCCTTTCGAAAGAAAGATTAATACCGGATGGCATACGAATATCGCATGATATTTTTATTAAAGAATTTCGGTTATCGATGGGGATGCGTTCCATTAGTTTGTTGGCGGGGTAACGGCCCACCAAGACTACGATGGATAGGGGTTCTGAGAGGAAGGTCCCCCACATTGGAACTGAGACACGGTCCAA	0	0	0	0	0	0	0	0	0	0	0	0	0	0	0	0	0	0	0	32	0	0	0	0	0	0	0	0	0	0	0	0	0	0	0	0	0	0	0	0	0	0	0	0	0	0	0	0
577	GATGAACGCTGGCGGCACGCTTAACACATGCAAGTCGAACGATTAAAGCACCTTCGGGTGTGTATAGAGTGGCGAACGGCTGAGTAACACGTGGGCAACCTGCCCTTCAGTTCGGAATAGCTACGGGAAACCGTGGGTAATACCGGATGATCCACCTCCCTCGCATGAAGGAGGTGGCAAAGATTTATCGCTGAAGGATGGGCCCGCGGCCTGTTAGCTTGTTGGTGAGGTAACGGCTCACCAAGGCAGTAATGGGTAGCCGGGTTGAGAGACCGACCGGCCAGATTGGGACTGAGACACGGCCCAG	0	0	0	0	0	0	0	0	0	0	0	0	0	0	0	0	0	0	132	0	0	0	0	0	0	0	0	0	0	0	0	0	0	0	0	0	0	133	0	0	0	0	28	0	0	0	0	0
578	AGTGAACGCTGGCGGCAGGCCTAATACATGCAAGTCGAACGGCAGCACAGCAGAGCTTGCTCTGTGGGTGGCGAGTGGCGGACGGGTGAGGAATACATGGGAATCTGCCCAGTCGTGGGGGATAACGTATGGAAACGTACGCTAATACCGCATGCGCCCTTCGGGGGAAAGCCGGGGACCTTCGGGCCTGGCGCGATTGGATGAGCCCATGTTCGATTAGCTAGTTGGCGGGGTAAAGGCCCACCAAGGCGACGATCGATAGCTGGTCTGAGAGGATGATCAGCCACACTGGGACTGAGACACGGCCCAG	0	0	0	0	0	0	0	0	0	0	0	0	0	0	0	0	0	0	0	0	0	0	0	0	0	0	0	0	0	0	0	0	0	0	0	0	0	0	0	0	0	0	0	0	0	0	0	0
579	GACGAACGCTGGCGGCGTGCCTAATACATGCAAGTCGAGCGAGCGGAACTAACAGATTTACTTCGGTAATGACGTTAGGAAAGCGAGCGGCGGATGGGTGAGTAACACGTGGGGGACCTGCCCCATAGTCTGGGATACCACTTGGAAACAGGTGCTAATACCGGATAAGAAAGCAGATCGCATGATCAGCTTTTAAAAGGCGGCGTAAGCTGTCGCTATGGGATGGCCCCGCGGTGCATTAGCTAGTTGGTAAGGTAAAGGCTTACCAAGGCGATGATGCATAGCCGAGTTGAGAGACTGATCGGCCACATTGGGACTGAGACACGGCCCAA	0	0	0	0	0	0	0	0	0	0	0	0	0	0	0	878	0	0	0	0	0	0	0	0	0	0	0	0	0	0	0	0	0	0	0	0	0	0	0	0	0	0	0	0	0	0	0	0
580	GATAAACGCTGGCGGCGTGCATAACACATGCAAGTCGAACGATGAAGCTTAGATGATTTCTTCGGAATGAACTTAAGTGGATTAGTGGCGAACGGGTGAGTAACACGTGAGTAACCTGCCTTACACAAGGGGATAGCCTCTGGAAACGGAGAATAATACCCTATAAAGTCTAATCAGCCCATGCTGGAAAGACCAAAGATTTATCGGTGTAAGATGGACTTGCGTCTGATTAGCTAGTTGGTGAGATAAAAGCTCACCAAGGCGACGATCAGTAGCCGGCTTGAGAGAGTGTACGGCCACATTGGGACTGAGACACGGCCCAA	0	0	0	0	0	0	0	0	0	0	0	0	0	0	0	0	0	0	0	0	0	0	0	0	0	0	0	0	0	0	0	0	0	0	0	0	0	0	0	0	0	0	0	0	0	0	0	0
581	GATGAACGCTGGCGGCGCGCCTAACACATGCAAGTCGAACGGCACCTATCTTCGGATAGAAGCGAGTGGCGAACGGCTGAGTAACACGTGGAGAACCTGCCCCCTCCCCCGGGATAGCCGCCCGAAAGGACGGGTAATACCGGATACCCCCGGGCGCCGCATGGCGCCCGGGCTAAAGCCCCGACGGGAGGGGATGGCTCCGCGGCCCATCAGGTAGACGGCGGGGTGACGGCCCACCGTGCCGACAACGGGTAGCCGGGTTGAGAGACCGACCGGCCAGATTGGGACTGAGACACGGCCCAG	0	0	0	0	0	0	0	0	0	0	0	0	0	0	0	0	0	0	0	0	0	0	0	0	0	14	193	0	0	0	0	0	0	0	0	0	0	0	0	0	0	0	0	0	0	0	0	0
582	GACGAACGCTGGCGGCGTGCCTAATACATGCAAGTAGAACGCTGAAGGAGGAGCTTGCTTCTCTGGATGAGTTGCGAACGGGTGAGTAACGCGTAGGTAACCTGCCTGGTAGCGGGGGATAACTATTGGAAACGATAGCTAATACCGCATAATAGTAGATGTTGCATGACATTTGCTTAAAAGGTGCAATTGCATCACTACCAGATGGACCTGCGTTGTATTAGCTAGTTGGTGAGGTAACGGCTCACCAAGGCGACGATACATAGCCGACCTGAGAGGGTGATCGGCCACACTGGGACTGAGACACGGCCCAG	0	0	0	0	0	0	0	0	0	0	0	0	0	0	0	0	0	0	0	24	0	0	0	0	0	0	0	0	0	0	0	0	0	0	0	0	0	0	0	0	0	0	0	0	0	0	0	0
583	GATGAACGCTGGCGGCGTGCTTAACACATGCAAGTCGAACGGGATCCATCGGGCTTTGCCTGGTGGTGAGAGTGGCGAACGGGTGAGTAATGCGTGACCGACCTGCCCCATGCACCGGAATAGCTCCTGGAAACGGGTGGTAATGCCGGATGCTCCATCACACCGCATGGTGTGTTGGGAAAGCCTTTGCGGCATGGGATGGGGTCGCGTCCTATCAGCTTGATGGCGGGGTAACGGCCCACCATGGCTTCGACGGGTAGCCGGCCTGAGAGGGCGACCGGCCACATTGGGACTGAGATACGGCCCAG	0	0	0	0	0	0	0	0	0	0	0	0	0	0	0	0	0	0	5	0	0	0	0	0	0	0	0	0	0	0	0	0	0	0	0	0	0	0	0	0	5	0	382	0	89	0	0	0
584	GATGAACGCTGGCGGCGTGCCTAACACATGCAAGTCGAACGGAGTCCAGCCTCAGAGACCTTCGGGTCAAAGAGGGGAAGACTGAGTGGCGGACGGGTGAGTAACACGTGGGCAACCTGGCTCATAGAGGGGGATAACAGAGAGAAATTTCTGCTAATACCGCATAAGCACACACTGCCGCATGGCAGAGGGTGAAAAGAGAATCGCTATGAGATGGACCCGCGTCTGATTAGCCAGTTGGCAGGGTAAGAGCCTACCAAAGCGACGATCAGTAGCCGATCTGAGAGGATGAACGGCCACATTGGGACTGAGACACGGCCCAA	0	0	0	0	0	0	0	0	0	0	0	0	0	0	0	0	0	0	0	0	0	0	0	0	0	0	0	0	7	0	864	0	0	0	0	0	0	0	0	0	0	0	0	0	0	0	0	0
585	GACGAACGCTGGCGGCGTGCTTAACACATGCAAGTCGAACGAAGAGCGATGGAAGCTTGCTTCTATCAATCTTAGTGGCGAACGGGTGAGTAACGCGTAATCAACCTGCCCTTCAGAGGGGGACAACAGTTGGAAACGACTGCTAATACCGCATACGATCCAATCTCGGCATCGAGACTGGATGAAAGGTGGCCTCTATTTATAAGCTATCACTGAAGGAGGGGATTGCGTCTGATTAGCTAGTTGGAGGGGTAACGGCCCACCAAGGCGATGATCAGTAGCCGGTCTGAGAGGATGAACGGCCACATTGGGACTGAGACACGGCCCAG	0	0	0	0	0	0	0	0	0	0	0	0	0	0	0	0	0	0	0	45	0	0	48	0	27	0	0	0	0	0	0	0	0	158	0	0	0	0	0	0	0	0	0	0	0	0	0	0
586	GACGAACGCTGGCGGCGTGCTTAACACATGCAAGTCGAACGAGAATCTACTGAAAGAGTTTTCGGACAATGGATGTAGAGGAAAGTGGCGGACGGGTGAGTAACGCGTGAGGAACCTGCCTTGAAGAGGGGGACAACAGTTGGAAACGACTGCTAATACCGCATAACGCATAGGGGTCGCATGATCTTTATGCCAAAGATTTATCGCTTCAAGATGGCCTCGCGTCTGATTAGCTAGTTGGCGGGGTAACGGCCCACCAAGGCGACGATCAGTAGCCGGACTGAGAGGTTGAACGGCCACATTGGGACTGAGATACGGCCCAG	0	0	0	0	0	0	0	0	0	0	0	0	0	0	0	0	0	0	0	0	0	0	0	0	0	0	0	0	0	0	0	0	0	0	0	0	0	0	0	0	0	0	0	0	0	0	0	0
587	GATTAACGCTGGCGGCGTGCATAACACATGCAAGTCGAACGATGAAGATTATTAGACTTCTTCGGAATGAAAATAATTGGATTAGTGGCGGACGGGTGAGTAACGCGTGAGTAACCTGCCTTACACAAGGGGATAGCCGTTGGAAACGACGAATAATACCCTATGAAACTATCACTTCGCATGAAGCGATAGTCAAAGTGTTAGCGGTGTAAGATGGACTTGCGTCTGATTAGCTAGTTGGTGAGAAAAAAGCCCACCAAGGCAACGATCAGTAGCCGGCTTGAGAGAGTGTACGGCCACATTGGGACTGAGACACGGCCCAG	0	0	0	0	0	0	15	0	0	0	0	0	0	0	0	0	0	0	0	0	0	18	40	0	0	0	0	0	0	0	0	0	0	0	0	0	18	20	0	0	0	0	0	0	0	0	0	0
588	GATAAACGCTGACAGAATGCTTAACACATGCAAGTCGATGATGGGAGCTAGCTTGCTAGAAGAAGTCATGGCGGACGGGTGAGTAACGTGTAAAGAACTTACCATATAGACTGGGATAACAGAGGGAAACTTCTGATAATACTGGATAAGTTAGTAGTAGCATTACTAAGTAATGAAAGGTAGCAATACGCTATATGAGAGCTTTGCATCCTATTAGCTAGTTGGTGGGGTAAAAGCCTACCAAGGCGATGATAGGTAGCCGGCCTGAGAGGGTGGACGGCCACAAGGGGACTGAGATACGGCCCTT	0	0	0	0	0	0	0	0	0	0	0	0	0	0	0	0	0	0	0	0	0	0	0	0	0	0	0	0	0	0	0	0	0	0	0	0	0	0	0	0	0	0	0	0	0	0	0	0
589	GATGAACGCTAGCTACAGGCTTAACACATGCAAGTTGAGGGGAAACGACATCGAAAGCTTGCTTTTGATGGGCGTCGACCGGCGCACGGGTGAGTAACGCGTATCCAACCTGCCCACCACTTGGGGATAACCTTGCGAAAGTAAGACTAATACCCAATGATATCTCTAGAAGACATCTGAAAGAGATTAAAGATTTATCGGTGATGGATGGGGATGCGTCTGATTAGCTTGTTGGCGGGGTAACGGCCCACCAAGGCAACGATCAGTAGGGGTTCTGAGAGGAAGGTCCCCCACATTGGAACTGAGACACGGTCCAA	0	0	0	0	0	0	0	0	0	0	0	0	0	0	0	0	0	0	0	0	0	0	0	0	0	0	0	0	0	0	0	0	0	0	0	0	0	0	5	0	0	0	0	0	0	0	0	0
590	GATGAACGCCGGCGGTGTGCCTAATACATGCAAGTCGAGCGCACTGGCCCAACTGATATGACGTGCTTGCACTGAGTTGACGTTGGATTACCAGTGAGCGGCGGACGGGTGAGTAACACGTGGGCAACCTGCCCTGAAGCGGGGGATAACATCTGGAAACAGGTGCTAATACCGCATAACATCGAAAACCACATGGTTTTCGTTTCAAAGATGGTTTCGGCTATCACTTCAGGATGGGCCCGCGGTGCATTAGCTAGTTGGTAAGGTAACGGCTTACCAAGGCAATGATGCATAGCCGAGTTGAGAGACTGATCGGCCACAATGGAACTGAGACACGGTCCAT	0	0	0	0	0	0	0	0	0	0	0	0	125	0	0	0	0	224	44	0	0	0	0	0	0	0	0	0	0	0	0	0	0	0	0	0	0	0	0	0	0	0	0	0	0	0	0	0
591	AACGAACGCTGGCGGCGTGCCTAACACATGCAAGTCGAGGGAGAAAGGCCGCAAGGTCGAGTAAACCGGCGAACGGGTGCGTAACACGTGGACAACCTACCTTCTTGACTGGGATAACTGGCCGAAAGGCTTGCTAATACCAGATAAGCCCACGTCCTTTAAGGAGGATGAGGGAAAAGGCGGCCTCTGTAAACAAGCTGTCACGAGAAGATGGGTCCGCGGCCCATCAGCTAGTTGGCGGGGTAACGGCCCACCAAGGCGACGACGGGTAGCTGGTCTGAGAGGATGATCAGCCACACTGGAACTGAGACACGGTCCAG	0	0	0	0	0	0	0	0	0	0	0	0	0	0	0	0	0	0	0	0	0	0	0	0	0	0	0	0	0	0	0	0	0	0	0	0	0	0	0	0	0	0	0	0	0	0	0	0
592	GACGAACGCTGGCGGCGTGCTTAATACATGCAAGTCGAACGAAGCTGCGAGACGGAATCCTTCGGGAGGAAGACTTGTAGACTTAGTGGCGGACGGGTGAGTAACGCGTGAGCAACCTGCCTATCAGAGGGGGACAACAGCTGGAAACGGCTGCTAATACCGCATAAGACCACGCTATCGCATGATAGAGAGGTCAAAGATTTATCGCTGATAGATGGGCTCGCGTCCCATTAGGTAGTTGGTGAGGTAACGGCCCACCAAGCCGACGATGGGTAGCCGACCTGAGAGGGTGATCGGCCACATTGGAACTGAGACACGGTCCAA	0	0	0	0	0	0	0	853	0	0	0	0	0	0	0	0	0	0	0	0	0	0	0	0	0	0	0	0	0	0	0	0	0	0	0	0	0	0	0	0	0	0	0	0	0	0	0	0
593	AACGAACGTTCGCGGCGCGCCTAACACATGCAAGTCGCACGAGAAAGGGCTTCGGCCCCGGTACAGTGGCGCACGGGTGAGTAACACGTGGGTAATCTTCCCTCGAGCGGGGGATAACATTCCGAAAGGAGTGCTAATACCGCATAAGACCACGGTCTCGAAAGAGACTGCGGTCAAAGCTGGCCTCTACTTGTAAGCTAGCACTTGAGGATGAGCCCGCGGCCCATCAGGTAGTTGGAAGGGTAACGGCCTACCAAGCCTAAGACGGGTAGCTGGTCTGAGAGGATGATCAGCCACACTGGAACTGAGACACGGTCCAG	0	0	0	0	0	0	0	0	0	0	0	0	0	0	0	0	0	0	0	0	0	0	0	0	0	0	0	0	0	0	0	0	0	0	0	0	0	0	0	0	0	0	0	0	0	0	0	0
594	GATGAACGCTGGCGGCGTGCTTAACACATGCAAGTCGAACGAAGTGCTACGACGGAAGTTTTCGGACGGAAGATGTAGTTACTTAGTGGCGGACGGGTGAGTAACGCGTGGGGAACCTGCCCTGTACCGGGGGATAGCAGCCGGAAACGGCTGATAATACCGCATAAGCGCACGAATGTCGCATGACATGGTGTGAAAAACTCCGGTGGTATAGGATGGACCCGCGTCTGATTAGCCGGTTGGTGGGGTAAAAGCCTACCAAAGCGAAGATCAGTAGCCGAGTTGAGAGACTGACCGGCCACATTGGGACTGAGACACGGCCCAG	0	0	0	0	0	0	0	0	0	0	0	0	0	0	0	0	0	0	0	0	0	0	0	0	0	0	0	0	0	0	0	0	0	0	0	0	0	0	0	0	0	0	0	0	0	0	0	0
595	GACGAACGCTGGCGGCGTGCTTAACACATGCAAGTCGAACGGAAAGGCTCCAGCTTGCTGGAGTACTCGAGTGGCGAACGGGTGAGTAACACGTGGGCAATCTGCCCTGCACTCTGGGATAAGCCTGGGAAACTGGGTCTAATACTGGATAGGACCTTTCTCCTCATGGGGTTTGGTGGAAAGTTTTTCGGTGCAGGATGAGCCCGCGGCCTATCAGCTTGTTGGTGGGGTAATGGCCTACCAAGGCGACGACGGGTAGCCGGCCTGAGAGGGTGATCGGCCACATTGGGACTGAGATACGGCCCAG	0	0	0	0	0	0	0	0	0	0	0	0	0	0	0	0	0	0	0	0	0	0	0	0	0	0	0	0	0	0	0	0	0	0	0	0	0	0	0	91	0	0	41	0	0	0	0	0
596	GACGAACGCTGGCGGCGTGCTTAACACATGCAAGTCGAACGGAAAGGCCAGTGCTTGCACTGGTACTCGAGTGGCGAACGGGTGAGTAACACGTGGGTGATCTGCCTTGCACTCTGGGATAAGCTTGGGAAACTGGGTCTAATACCGGATAGGAACCGTCTTTAGTGTGGTGGTTGGAAAGTTTTTCGGTGCAAGATGAGCTCGCGGCCTATCAGCTTGTTGGTGGGGTAATGGCCTACCAAGGCGTCGACGGGTAGCCGGCCTGAGAGGGTGTACGGCCACATTGGGACTGAGATACGGCCCAG	0	0	0	0	0	0	0	0	0	0	0	0	0	0	0	0	0	0	0	0	0	0	0	0	0	0	0	0	0	0	0	0	0	0	0	0	0	0	0	0	0	0	0	0	0	0	0	0
597	GATGAACGCTGGCGGCGTGCCTAATACATGCAAGTCGAGCGAACAGACGAGGAGCTTGCTCCTCTGACGTTAGCGGCGGACGGGTGAGTAACACGTGGATAACCTACCTATAAGACTGGGATAACTTCGGGAAACCGGAGCTAATACCGGATAACATGTTGAACCGCATGGTTCAACAGTGAAAGACGGTTTTGCTGTCACTTATAGATGGATCCGCGTCGCATTAGCTAGTTGGTAAGGTAACGGCTTACCAAGGCAACGATGCGTAGCCGACCTGAGAGGGTGATCGGCCACACTGGAACTGAGACACGGTCCAG	0	0	0	0	0	0	0	0	0	0	0	0	0	0	0	0	0	0	0	0	0	0	0	0	0	0	0	0	0	0	0	0	0	0	0	0	0	0	0	0	0	0	0	0	0	0	0	0
598	GACGAACGCTGGCGGCGTGCTTAACACATGCAAGTCGAACGGAAAGGCCCTGCTTGCAGGGTATTCGAGTGGCGAACGGGTGAGTAACACGTGGGTGATCTGCCCTGCACTTCGGGATAAGCTTGGGAAACTGGGTCTAATACCGGATAGGAGCCATCTTTAGTGTGGTGGTTGGAAAGTTTTTTCGGTGTAGGATGAGCTCGCGGCCTATCAGCTTGTTGGTGGGGTAATGGCCTACCAAGGCGGCGACGGGTAGCCGGCCTGAGAGGGTGTACGGCCACATTGGGACTGAGATACGGCCCAG	0	0	0	0	0	0	0	0	0	0	0	0	0	0	0	0	0	0	0	0	0	0	0	0	0	0	0	0	0	0	0	0	0	0	0	0	0	0	0	0	0	0	0	0	0	0	0	0
599	GACGAACGCTGGCGGCGTGCCTAATACATGCAAGTCGAGCGAGCTTGCCTAGATGAATTTGGTGCTTGCACCAGATGAAACTAGATACAAGCGAGCGGCGGACGGGTGAGTAACACGTGGGTAACCTGCCCAAGAGACTGGGATAACACCTGGAAACAGATGCTAATACCGGATAACAACACTAGACGCATGTCTAGAGCTTAAAAGATGGTTCTGCTATCACTCTTGGATGGACCTGCGGTGCATTAGCTAGTTGGTAAGGTAACGGCTTACCAAGGCAATGATGCATAGCCGAGTTGAGAGACTGATCGGCCACATTGGGACTGAGACACGGCCCAA	0	0	0	0	0	0	0	0	0	0	0	0	0	0	0	0	0	0	0	0	0	0	0	0	0	0	0	0	0	0	0	0	0	0	0	0	0	0	0	0	0	0	0	0	0	0	0	0
600	ATTGAACGCTGGCGGCAGGCTTAACACATGCAAGTCGAACGGTAACATAAAGAAGCTTGCTTCTTTGATGACGAGTGGCGGACGGGTGAGTAATGCTTGGGAATCTAGCTTATGGAGGGGGATAACTACGGGAAACTGTAGCTAATACCGCGTAGTATCGAGAGATGAAAGTGTGGGACCTTCGGGCCACATGCCATAGGATGAGCCCAAGTGGGATTAGGTAGTTGGTGAGGTAAAGGCTCACCAAGCCGACGATCTCTAGCTGGTCTGAGAGGATGACCAGCCACACTGGGACTGAGACACGGCCCAG	0	0	0	0	0	0	0	0	0	0	0	0	0	0	0	0	0	0	0	0	0	0	0	0	0	0	0	0	0	0	0	0	0	0	0	0	0	0	0	0	0	0	0	0	0	0	0	0
601	GATGAACGCTGGCGGCGTGCCTAATACATGCAAGTCGAGCGAACAGATGAGGAGCTTGCTCCTTTGACGTTAGCGGCGGACGGGTGAGTAACACGTAGGTAACCTACCTATAAGACTGGGATAACTTCGGGAAACCGGAGCTAATACCGGATAATATTTCGAACTGCATGGTTCGATAGTGAAAGATGGCTTTGCTATCACTTATAGATGGACCTGCGCCGTATTAGCTAGTTGGTAAGGTAACGGCTTACCAAGGCAACGATACGTAGCCGACCTGAGAGGGTGATCGGCCACACTGGAACTGAGACACGGTCCAG	0	0	0	0	0	0	0	0	0	0	0	0	0	0	0	0	0	0	0	0	0	69	138	0	0	0	0	0	0	0	0	0	0	0	0	0	0	0	0	0	0	0	0	0	0	0	0	0
602	ATTGAACGCTGGCGGCATGCCTTACACATGCAAGTCGAACGGCAGCACGGGAGCAATCCTGGTGGCGAGTGGCGAACGGGTGAGTAATACATCGGAACGTGCCCAATCGTGGGGGATAACGCAGCGAAAGCTGTGCTAATACCGCATAAGATCTACGGATGAAAGCAGGGGATCGCAAGACCTTGCGCGAATGGAGCGGCCGATGGCAGATTAGGTAGTTGGTGAGGTAAAGGCTCACCAAGCCTTCGATCTGTAGCTGGTCTGAGAGGACGACCAGCCACACTGGGACTGAGACACGGCCCAG	0	0	0	0	0	0	0	0	0	0	0	0	0	0	0	0	0	0	0	0	0	0	0	0	0	0	0	0	0	0	0	0	0	0	0	0	0	0	0	0	0	0	0	0	0	0	0	0
603	GACGAACGCTGGCGGCGCGCCTAACACATGCAAGTCGAGCGAGAACCAGGGCTTCGGCCCTGGGGACAGCGGCGAACGGGTGAGTAACACGTGGATAACCTGCCCTCGGCACCGGAATAGCCCGGGGAAACCCGGATTAATGCCGGATAGCCCCACATCCCTGCGGGGAACGTGGGAAAAGGTAGCTTCGGCCTCTGGCCGAGGATGGGTCCGCGGTGGATTAGCTTGTTGGCGGGGTAACGGCCCACCAAGGCGACGATCCATAGCTGGTCTGAGAGGACGATCAGCCACACTGGGACTGAGACACGGCCCAG	0	0	0	0	0	0	0	0	0	0	0	0	0	0	0	0	0	0	0	0	0	0	0	0	0	0	0	0	0	0	0	0	0	0	0	0	0	0	0	0	0	0	0	0	0	0	0	0
604	GACGAACGCTGGCGGCGTGCTTAACACATGCAAGTCGAACGGAAAGGCCCTGCTTGCAGGGTACTCGAGTGGCGAACGGGTGAGTAACACGTGGGTGATCTGCCTTGCACTTCGGGATAAGCCTGGGAAACTGGGTCTAATACCGGATAGGACCATGCTTTAGTGTGTGTGGTGGAAAGTTTTTCGGTGCAAGATGAGCCCGCGGCCTATCAGCTTGTTGGTGGGGTAATGGCCTACCAAGGCGACGACGGGTAGCCGGCCTGAGAGGGTGTACGGCCACATTGGGACTGAGACACGGCCCAG	0	0	0	0	0	0	0	0	0	0	0	0	0	0	0	0	0	0	0	0	0	0	0	0	0	0	0	0	0	0	0	0	0	0	0	0	0	0	0	0	0	0	0	0	0	0	0	0
605	GACGAACGCTGGCGGCGTGCTTAACACATGCAAGTCGAACGGAAAGGCCCTGCTTGCAGGGTGCTCGAGTGGCGAACGGGTGAGTAACACGTGGGTGATCTGCCCCTTACTTTGGGATAAGCCTGGGAAACTGGGTCTAATACTGGATAGGACCATGCTGTAGGTGGTGTGGTGGAAAGATTTTTTCGGTAAGGGATGAGCTCGCGGCCTATCAGCTTGTTGGTGGGGTAATGGCCTACCAAGGCGTCGACGGGTAGCCGGCCTGAGAGGGTGGACGGCCACATTGGGACTGAGATACGGCCCAG	0	0	0	0	0	0	0	0	0	0	0	0	0	0	0	0	72	0	0	0	0	0	0	0	0	0	0	0	0	0	0	0	0	0	0	0	0	0	0	0	0	0	0	0	0	0	0	0
606	AACGAACGCTGGCGGCAGGCTTAACACATGCAAGTCGAGCGCCCCGCAAGGGGAGCGGCAGACGGGTGAGTAACACGTGGGAACGTACCCTTTTCTACGGAATAACCCAGGGAAACTTGGACTAATACCGTATGTGCCCTTCGGGGGAAAGATTTATCGGAAAAGGATCGGCCCGCGTTGGATTAGCTAGTTGGTGGGGTAAAGGCCTACCAAGGCGACGATCCATAGCTGGTCTGAGAGGATGATCAGCCACATTGGGACTGAGACACGGCCCAA	0	0	0	103	0	0	0	0	0	0	0	0	0	0	0	0	0	0	0	14	0	0	0	0	0	0	0	0	0	0	0	0	0	0	0	0	0	0	0	0	0	0	0	0	0	0	0	0
607	GATGAACGCTGGCGGCGTGCCTAACACATGCAAGTCGAGCGAGGGTTTGCTCAGTATTGAGTATTCTAAGTCTAGAATGTTCAATTCTGAGCAAAACCAAGCGGCGGACGGGTGAGTAACGCGTGGGTAACCTGCCCTATACACATGGATAACATACTGAAAAGTTTACTAATACATGATAATATATATTTGCGGCATCGCAGATATATCAAAGTGTTAGCGGTATAGGATGGACCCGCGTCTGATTAGCTAGTTGGTGAGATAACTGCCCACCAAGGCGACGATCAGTAGCCGACCTGAGAGGGTGATCGGCCACATTGGAACTGAGACACGGTCCAA	0	0	0	0	0	0	0	0	0	0	0	0	0	0	0	0	0	0	0	0	0	0	0	0	0	0	0	0	0	0	0	0	0	0	0	0	0	0	0	0	0	0	0	0	0	0	0	0
608	GATGAACGCTAGCGGCAGGCCTAACACATGCAAGTCGAGGGAGAGGTTACCTTCGGGTAACCAAAACCGGCGCACGGGTGCGTAACGCGTATACAATCTGCCTTTCACATAGGGATAGCCCGAAGAAATTTGGATTAATACCTAATGGTATATAAGAGCGGCATCGTTTTTATATTAAAGCTACGGTGGTGAAAGATGAGTATGCGTTCTATTAGCTAGTTGGAGAGGTAACGGCTCCCCAAGGCGACGATAGATAGGGGTTCTGAGAGGGATGTCCCCCACACTGGTACTGAGATACGGACCAG	0	0	0	0	0	0	0	0	0	0	0	0	0	0	0	0	0	0	0	0	0	0	0	0	0	0	0	0	0	0	0	0	0	0	0	0	0	0	0	0	0	0	0	0	0	0	0	0
609	GACGAACGCTGGCGGCGTGCCTAATACATGCAAGTCGAACGAGAGCGACCGGTGCTTGCACTGGTCAATCTAGTGGCGAACGGGTGAGTAACACGTGGGTAACCTGCCCATCAGAGGGGGATAACATTCGGAAACGGATGCTAAAACCGCATAGGTCCTTTAACCGCATGGTTGAAGGAGGAAAAGAGGCGCAAGCTTCTGCTGATGGATGGACCCGCGGTGCATTAGCTAGTTGGTGAGGTAACGGCTCACCAAGGCCGTGATGCATAGCCGACCTGAGAGGGTGATCGGCCACATTGGGACTGAGACACGGCCCAA	0	0	0	0	0	0	0	0	0	0	0	0	0	0	0	0	0	0	0	36	0	0	0	0	0	0	0	0	0	0	0	0	0	0	0	0	0	0	0	0	0	0	0	0	0	0	0	0
610	GACGAACGCTGGCGGCGTGCTTAACACATGCAAGTCGAACGGGAAGACATGAAGAGCTTGCTCTTTATGAAATCCAGTGGCAAACGGGTGAGTAACACGTAAACAACCTGCCTTCAGGATGGGGACAACAGACGGAAACGACTGCTAATACCGAATACGATTCTTGAGTCGCATGACACAAGAAAGAAAGGGTGGCCTCTACAAGTAAGCTATCGCCTGAAGAGGGGTTTGCGTCCGATTAGGTAGTTGGTGAGGTAACGGCCCACCAAGCCGACGATCGGTAGCCGGTCTGAGAGGATGAACGGCCACATTGGAACTGAGACACGGTCCAG	0	0	0	0	0	0	0	0	0	0	0	0	0	0	0	0	0	0	0	0	0	0	0	0	0	0	0	0	0	0	0	0	0	0	0	0	0	0	0	0	0	0	111	0	0	0	0	0
611	GATAAACGCTGGCGGCGTGCATAACACATGCAAGTCGAACGATGAAACTTAAATGATTTCTTCGGAATGAACTTAAGCGGATTAGTGGCGAACGGGTGAGTAACACGTGAGTAACCTGCCTTACACAAGGGGATAGCCTTTGGAAACGAAGAATAATACCCTATGACGTTAATTTATCGCATGATAGAATGACCAAAGATTTATCGGTGTAAGATGGACTTGCGTCTGATTAGCTAGTTGGTGAGATAAAGGCCCACCAAGGCAACGATCAGTAGCCGGCTTGAGAGAGTGTACGGCCACATTGGGACTGAGACACGGCCCAA	0	0	0	0	0	0	0	0	0	0	0	0	0	0	0	0	0	0	0	0	0	0	0	0	0	0	0	0	0	0	0	0	0	0	0	0	0	0	0	0	0	0	0	0	0	0	0	0
612	GATGAACGCTGGCGGCGTGCCTAATACATGCAAGTCGAGCGAACAGATAAGGAGCTTGCTCCTTTGACGTTAGCGGCGGACGGGTGAGTAACACGTGGATAACCTACCTATAAGACTGGGATAACTTCGGGAAACCGGAGCTAATACCGGATAAGATTTTGAACCGCATGGTTCAATAGTGAAAGACGGCCTTGCTGTCACTTATAGATGGATCCGCGCCGTATTAGCCAGTTGGTAAGGTAACGGCTTACCAAGGCAACGATACGTAGCCGACCTGAGAGGGTGATCGGCCACACTGGAACTGAGACACGGTCCAG	0	0	0	0	0	0	0	0	0	0	0	0	0	0	0	0	0	0	0	0	0	0	0	0	0	0	0	0	0	0	0	0	0	0	0	0	0	0	0	0	0	0	0	0	0	0	0	0
613	GACGAACGCTGGCGGCGTGCCTAATACATGCAAGTAGAACGCTGAAGAGAGGAGCTTGCTCTTCTTGGATGAGTTGCGAACGGGTGAGTAACGCGTAGGTAACCTGCCTGGTAGCGGGGGATAACTATTGGAAACGATAGCTAATACCGCATAAAATGGATTATCGCATGATAATCCATTGAAAGGTGCAAATGCATCACTACCAGATGGACCTGCGTTGTATTAGCTAGTTGGTGGGGTAACGGCTCACCAAGGCGACGATACATAGCCGACCTGAGAGGGTGATCGGCCACACTGGGACTGAGACACGGCCCAG	0	0	0	0	0	0	0	0	0	0	0	0	0	0	0	0	0	0	0	0	0	0	0	0	0	32	0	0	0	0	0	0	0	0	0	0	0	0	0	0	0	0	0	0	0	0	0	0
614	GATGAACGCTAGCTACAGGCTTAACACATGCAAGTCGAGGGGCAGCATTTTAGTTTGCTTGCAAACTGAAGATGGCGACCGGCGCACGGGTGAGTAACACGTATCCAACCTGCCGATAACTCCGGGATAGCCTTTCGAAAGAAAGATTAATACCGGATAGCATACGAATATCGCATGATATTTTTATTAAAGAATTTCGGTTATCGATGGGGATGCGTTCCATTAGTTTGTTGGCGGGGTAACGGCCCACCAAGACTACGATGGATAGGGGTTCTGAGAGGAAGGTCCCCCACATTGGAACTGAGACACGGTCCAA	0	0	0	0	0	0	0	0	0	0	0	0	0	0	0	0	0	0	0	0	0	0	0	0	0	0	0	0	0	0	0	0	0	0	0	0	0	0	0	0	0	0	0	0	0	0	0	0
615	AGTGAACGCTGGCGGCGTGCCTAATACATGCAAGTCGAACGATGAAGTCCTAGCTTGCTAGGATGGATTAGTGGCGCACGGGTGAGTAATATATAGTTAATCTGCCCTACACAGAGGAACAACAGTTGGAAACGACTGCTAATACCTCATACTCCTATTTGACATAAGTTAAATAGGGAAAGTCTTTTCGGTGTAGGATGAGACTATATCGTATCAGCTAGTTGGTAAGGTAATGGCTTACCAAGGCTATGACGCGTAACTGGTCTGAGAGGATGATCAGTCACATTGGAACTGAGACACGGTCCAA	0	0	0	0	0	0	0	0	0	0	0	0	0	0	0	0	0	0	129	0	0	0	0	0	0	0	0	0	0	0	0	0	0	0	0	0	29	23	0	0	0	0	39	0	0	0	0	0
616	GACGAACGCTGGCGGCGTGCTTAACACATGCAAGTGGAGCGACGAACCAGGCTTCGGCCTGGGGCAGAGCCGCGAACGGGTGAGTAACACGTGGGTAACCTGCCCTGATGATCGGGACAACCCGGGGAAACCCGGGCTAATACCGAATGTGCCCTCCGTCCACAAGGACGACGGGGAAAGGAAGCTTCGGCCTCCGCATCGGGATGGGCCCGCGGCGCATTAGCTCGTTGGTGAGGTAACGGCTCACCAAGGCAACGATGCGTAGCTGGTCTGAGAGGACGATCAGCCACACTGGGACTGAGACACGGCCCAG	0	0	0	0	0	0	0	0	0	785	0	11	0	0	0	0	0	0	0	0	0	0	0	0	0	0	0	0	0	0	0	0	0	0	0	0	0	0	0	0	0	0	0	0	0	0	0	0
617	GATGAACGCTGGCGGCGTGCTTAACACATGCAAGTCGAACGGGAAACCTATTATTGAAACTTCGGTCGATTTAATTTGTTTCTAGTGGCGGACGGGTGAGTAACGCGTGGGTAACCTGCCCTATACAGGGGGATAACAACCAGAAATGGTTGCTAATACCGCATAAGCGCACGGGACCGCATGGTCCAGTGTGAAAAACTCCGGTGGTATAGGATGGACCCGCGTTGGATTAGCTAGTTGGTGGGGTAACGGCCCACCAAGGCGACGATCCATAGCCGGCCTGAGAGGGTGAACGGCCACATTGGGACTGAGACACGGCCCAG	0	0	0	0	0	0	0	0	0	0	0	0	0	0	0	0	0	0	0	0	0	0	0	0	0	0	0	0	0	0	0	0	0	0	0	0	0	0	0	0	0	0	0	0	0	0	0	0
618	GACGAACGCTGGCGGCGTGCCTAATACATGCAAGTAGAACGCTGAAGGAGGAGCTTGCTTCTCTGGATGAGTTGCGAACGGGTGAGTAACGCGTAGGTAACCTGCCTGGTAGCGGGGGATAACTATTGGAAACGATAGCTAATACCGCATAATAGTAGATGTTGCATGACATTTGCTTAAAAGGTGCAATTGCATCACTACCAGATGGACCTGCGTTGTATTAGCTAGTTGGTGGGGTAACGGCTCACCAAGGCGACGATACATAGCCGACCTGAGAGGGTGATCGGCCACACTGGGACTGAGACACGGCCCAG	0	0	0	0	0	0	0	0	0	0	0	0	0	0	0	0	0	0	0	0	0	0	0	0	0	0	93	0	0	0	0	0	0	326	0	0	0	0	0	0	0	0	0	0	0	0	0	0
619	GACGAACGCTGGCGGCGTGCTTAACACATGCAAGTCGAACGATGAACCAGGAGCTTGCTCTTGGGGATTAGTGGCGAACGGGTGAGTAACACGTGAGTAACCTGCCCTTGACTCTGGGATAACCTCCGGAAACGGAAGCTAATACCGGATACGAACTGCGAAGGCATCTTCAGCAGTTGGAAAGAACTTCGGTCAAGGATGGACTCGCGGCCTATCAGGTAGTTGGTGAGGTAACGGCTCACCAAGCCTACGACGGGTAGCCGGCCTGAGAGGGTGACCGGCCACACTGGGACTGAGACACGGCCCAG	0	0	0	0	0	0	0	0	0	0	0	0	0	0	0	0	0	0	0	0	0	0	0	0	0	22	0	0	0	0	0	0	0	0	33	0	0	0	0	0	0	0	0	0	0	0	0	0
620	AACGAACGTTAGCGGCGCGCCTAACACATGCAAGTCGCACGAGAAAGGGCTTCGGCCCCGGTACAGTGGCGCACGGGTGAGTAACACGTGGGTAATGTTCCCTCGGGCGGGGGATAACCTTCCGAAAGGAGGGCTAATACCGCATAAGACCACGGCCTCGAAAGGGGCAGCGGTCAAAGCAGGCCTCTTCATGAAAGCTTGCACCTGAGGATCAGCCCGCGGCCCATCAGCTAGTTGGCAGGGTAATGGCCTACCAAGGCTTAGACGGGTAGCTGGTCTGAGAGGATGATCAGCCACACTGGAACTGAGACACGGTCCAG	0	0	0	0	0	0	0	0	0	0	0	0	0	0	0	0	0	0	0	0	0	0	0	0	0	0	0	0	0	0	0	0	0	0	0	0	0	0	0	0	0	0	0	0	0	0	0	0
621	GACGAACGCTGGCGGCGTGCTTAACACATGCAAGTCGAACGGAAAGGCCAGTGCTTGCACTGGTACTCGAGTGGCGAACGGGTGAGTAACACGTGGGTGATCTGCCTTGCACTCTGGGATAAGCTTGGGAAACTGGGTCTAATACCGGATATGAACTGCCTTTAGTGTGGTGGTTGGAAAGTTTTTTCGGTGCAAGATGAGCTCGCGGCCTATCAGCTTGTTGGTGGGGTAATGGCCTACCAAGGCGTCGACGGGTAGCCGGCCTGAGAGGGTGTACGGCCACATTGGGACTGAGATACGGCCCAG	0	0	0	0	0	0	0	0	0	0	0	0	0	0	0	0	0	0	0	0	0	0	0	0	0	0	0	0	0	0	0	0	0	0	0	0	0	0	0	0	0	0	0	0	0	0	0	0
622	GATGAACGCTGGCGGCGTGCCTAATACATGCAAGTCGAGCGAACAGACGAGGAGCTTGCTCCTCTGACGTTAGCGGCGGACGGGTGAGTAACACGTGGATAACCTACCTATAAGACTGGGATAACTTCGGGAAACCGGAGCTAATACCGGATAATATATTGAACCGCATGGTTCAATAGTGAAAGGCGGTTTTGCTGTCACTTATAGATGGATCCGCGCCGCATTAGCTAGTTGGTAAGGTAACGGCTTACCAAGGCGACGATGCGTAGCCGACCTGAGAGGGTGATCGGCCACACTGGAACTGAGACACGGTCCAG	0	0	0	0	0	0	0	0	0	0	0	0	0	0	0	0	0	0	0	0	0	0	0	0	0	0	0	0	0	0	0	0	0	0	0	0	0	0	0	0	0	0	0	0	0	0	0	0
623	GATGAACGCTAGCTATAGGCTTAACACATGCAAGTCGAGGGGAAACGGCAGAGAGTGCTTGCACACTTTGGACGTCGACCGGCGCACGGGTGAGTAACGCGTATCCAACCTGCCCTTTACTTGGGGATAACCCGTTGAAAGACGGACTAATACCCAATGATATTCATTGATGACATCTGATTTGAATTAAAGATTTATCGGTATAGAATGGGGATGCGTCTGATTAGCTTGTTGGTGAGGTAACGGCTCACCAAGGCAACGATCAGTAGGGGTTCTGAGAGGAAGGTCCCCCACATTGGAACTGAGACACGGTCCAA	0	0	0	0	0	0	0	0	0	0	0	0	0	0	0	0	0	0	0	0	0	0	0	0	0	0	0	0	0	0	0	0	0	0	0	0	0	0	0	0	0	0	0	0	0	0	0	0
624	GATTAACGCTGGCGGCATGCCTAATACATGCAAATCGAACGAAGCCTTTTAGGCTTAGTGGTGAACGGGTGAGTAACACGTATCCAATCTACCCTTAAGTTGGGGATAACTAGTCGAAAGATTAGCTAATACCGAATAATAACATCAATATCGCATGAGAAGATGTAGAAAGTCGCTCTTTGTGGCGACGCTTTTGGATGAGGGTGCGACGTATCAGATAGTTGGTGAGGTAATGGCTCACCAAGTCAATGACGCGTAGCTGTACTGAGAGGTAGAGCAGCCACAATGGGACTGAGACACGGCCCAT	0	0	0	0	0	0	0	0	0	0	0	0	0	0	0	0	0	0	0	0	0	0	0	0	0	0	0	0	0	0	0	0	0	0	0	0	0	0	0	0	0	0	0	0	0	0	0	0
625	GATGAACGCTAGCGGGAGGCCTAACACATGCAAGCCGAGCGGTATGGATCTTTCGGGATCCAGAGAGCGGCGTACGGGTGCGGAACACGTGTGCAACCTGCCTTTATCAGGGGGATAGCCTTTCGAAAGGAAGATTAATACCCCATAATATTTAGAATGGCATCATTTTAAATTGAAAACTCCGGTGGATAGAGATGGGCACGCGCAAGATTAGATAGTTGGTGAGGTAACGGCTCACCAAGTCTGCGATCTTTAGGGGGCCTGAGAGGGTGATCCCCCACACTGGTACTGAGACACGGACCAG	0	0	0	0	0	0	0	0	0	0	0	0	0	0	0	0	0	0	0	0	0	0	0	0	0	0	0	0	0	0	0	0	0	0	0	0	0	0	0	0	0	0	0	0	0	0	0	0
626	GATGAACGCTGGCGGCGTGCTTAACACATGCAAGTCGAACGGGCTCATATTGAAACCTAGTGATTTATGAGTTAGTGGCGGACGGGTGAGTAACGCGTGGAAAACCTGCCGTATACTGGGGGATAACACTTAGAAATAGGTGCTAATACCGCATAAGCGCACAGCTTCGCATGAAGTGGTGTGAAAAACTCCGGTGGTATACGATGGTTCCGCGTCTGATTAGCTTGTTGGTGGGGTAATGGCTCACCAAGGCGACGATCAGTAGCCGGCCTGAGAGGGTGAACGGCCACATTGGGACTGAGACACGGCCCAA	0	0	0	0	0	0	0	0	0	0	0	0	0	62	0	0	0	0	0	105	0	0	0	0	0	203	0	0	0	0	0	0	0	0	0	0	0	0	0	0	0	0	0	0	0	0	0	0
627	ATTGAACGCTGGCGGAATGCTTTACACATGCAAGTCGAGCGGCAGCGCGGGGCAACCTGGCGGCGAGCGGCGAACGGGTGAGTAATGTATCGGAACGTACCCAGTCGTGGGGGATAACTATCCGAAAGGATAGCTAATACCGCATACGTCCTGAGGGAGAAAGCGGGGGATCGCAAGACCTCGCGCGATTGGAGCGGCCGATATCGGATTAGCTAGTTGGTGAGGTAAAGGCTCACCAAGGCGACGATCCGTAGCTGGTCTGAGAGGACGACCAGCCACACTGGAACTGAGACACGGTCCAG	0	0	0	0	0	0	0	0	0	0	0	0	0	0	0	0	0	0	0	0	0	0	0	0	0	0	0	0	0	0	0	0	0	0	0	0	0	5	2	0	0	0	0	0	0	0	26	0
628	GATGAACGCTGGCGGCGTGCCTAATACATGCAAGTCGAGCGAACAGACGAGGAGCTTGCTCCTTTGACGTTAGCGGCGGACGGGTGAGTAACACGTGGGTAACCTACCTATAAGACTGGGATAACTTCGGGAAACCGGAGCTAATACCGGATAATATTTCGAACCGCATGGTTCGATAGTGAAAGATGGCTCTGCTATCACTTATAGATGGACCTGCGCCGTATTAGCTAGTTGGTAAGGTAACGGCTTACCAAGGCAACGATACGTAGCCGACCTGAGAGGGTGATCGGCCACACTGGAACTGAGAAACGGTCCAG	0	0	0	0	0	0	0	0	0	0	0	0	0	0	0	0	0	0	0	0	0	0	0	0	0	0	0	0	0	0	0	0	0	0	0	0	0	0	0	0	0	0	0	0	0	0	0	0
629	ATTGAACGCTGGCGGCATGCCTAACACATGCAAGTCGAACGGCAGCACAGTCGTAGCAATACGATGGGTGGCGAGTGGCGGACGGGTGAGGAATACATCGGGACCTGCCCAGACGTGGGGGATAACGTAGGGAAACTTACGCTAATACCGCATACGTCCTACGGGAGAAAGCGGGGGATCAGCAATGACCTCGCGCGGTTGGATGGACCGATGTTCGATTAGCTAGTTGGTGGGGTAATGGCCTACCAAGGCGACGATCGATAGCTGGTCTGAGAGGATGATCAGCCACACTGGGACTGAGACACGGCCCAG	0	0	0	0	0	0	0	0	0	0	0	0	0	0	0	0	0	0	0	0	0	0	0	0	0	0	0	0	0	0	0	0	0	0	0	0	0	0	0	0	0	0	0	0	0	0	0	0
630	GATGAACGCTGGCGGCGTGCTTAACACATGCAAGTCGAACGATGAAGCCCAGCTTGCTGGGTGGATTAGTGGCGAACGGGTGAGTAACACGTGAGTAACCTGCCCCCGACTCTGGGATAAGCCCGGGAAACTGGGTCTAATACCGGATATTACCTTTGACCGCATGGTTGTTGGTGGAAAGATTTATCGGTGGGGGATGGACTCGCGGCCTATCAGCTTGTTGGTGAGGTAATGGCTCACCAAGGCGACGACGGGTAGCCGGCCTGAGAGGGTGACCGGCCACACTGGGACTGAGACACGGCCCAG	0	0	0	0	0	0	0	0	0	0	0	0	0	0	0	0	0	0	0	0	0	0	0	0	0	0	0	0	0	0	0	0	0	0	0	0	0	0	0	0	0	0	0	0	0	0	0	0
631	GACGAACGCTGGCGGCGCGCTTAACACATGCAAGTCGAGCGATGAAATTTTGACAGATCCCTTCGGGGTGAAGATAAAATGGATTAGCGGCGGACGGGTGAGTAACACGTGAGTAACCTGCCTTAGACATTGGGATAGCCTCGGGAAACCGGGATTAATACCGAATAAAATCACAGATACACATGTATCCATGATCAAAACTCCGGTGGTCTAAGATGGACTCGCGTCCCATTAGCTAGTTGGTGAGGTAACGGCCCACCAAGGCGACGATGGGTAGCCGGCCTGAGAGGGTGAACGGCCACATTGGAACTGAGAGACGGTCCAA	0	0	0	0	0	0	0	0	0	0	0	0	0	0	0	0	0	0	0	0	0	0	0	0	0	0	0	0	0	0	0	0	0	0	0	0	0	0	0	0	0	0	0	7	0	0	0	0
632	GATGAACGCTGACAGAATGCTTAACACATGCAAGTCTTTGGCGAAGCTGTGCTTGCACAGCCTAGCCAAGGCGGACGGGTGAGTAACGCGTAAGGGACTTGCCCTGCAGTCAGGGATAACAGACGGAAACGACTGATAAGACCTGGTAAAGTCAGGCGGACTCATGTCCAGCCTGATGAAAAGGAATGCTGCAGGAGAGCCTTGCGTCCTATTAGCTTGTTGGTGGGGTAACGGCCCACCAAGGCGATGATAGGTAGCCGGCCTGAGAGGGTGGACGGCCACAAGGGGACTGAGATACGGCCCTT	0	0	0	0	0	0	0	0	0	0	0	0	0	0	0	0	0	0	0	0	0	0	0	0	0	0	0	0	0	0	0	0	0	0	0	0	0	0	0	0	0	0	0	0	0	0	0	0
633	GACGAACGCTGGCGGCGTGCCTAATACATGCAAGTCGAGCGAAGTTTTTCTGGTGCTTGCACTAGAAAAACTTAGCGGCGAACGGGTGAGTAACACGTAAAGAACCTGCCTCATAGACTGGGACAACTATTGGAAACGATAGCTAATACCGGATAACAGCATTAACTGCATGGTTGATGTTTAAAAGTTGGTTTTGCTAACACTATGAGATGGCTTTGCGGTGCATTAGCTAGTTGGTGGGGTAAAGGCCTACCAAGGCGACGATGCATAGCCGACCTGAGAGGGTGATCGGCCACACTGGGACTGAGACACGGCCCAG	0	0	0	0	0	0	4	0	0	0	0	0	0	0	0	0	0	0	0	300	0	0	0	0	0	135	0	0	0	0	0	0	0	0	0	0	0	0	0	0	0	0	0	0	0	0	0	0
634	GACGAACGCTGGCGGCGTGCTTAACACATGCAAGTCGAACGAAAAGACGGAAAGAGCTTGCTCTTTTCAGAATTGAGTGGCAAACGGGTGAGTAACACGTAAACAACCTGCCTTCAGGATGGGGACAACAGACGGAAACGACTGCTAATACCGAATAAGTTCCAAGAGCCGCATGGCCCATGGAAGAAAAGGTGGCCTCTACCTGTAAGCTATCGCCTGAAGAGGGGTTTGCGTCTGATTAGCTGGTTGGAGGGGTAACGGCCCACCAAGGCGACGATCAGTAGCCGGTCTGAGAGGATGAACGGCCACACTGGAACTGAGACACGGTCCAG	0	0	0	0	0	0	0	0	0	0	0	0	0	0	0	0	0	0	0	25	0	0	0	0	0	0	0	0	0	0	0	709	0	0	0	2	0	0	0	0	0	0	0	0	0	0	0	0
635	GATGAACGCTAGCGATAGGCTTAACACATGCAAGTCGAGGGGTAACGTGTTGGAAGCTTGCTTCCGATGACGACGACCGGCGGATGGGTGCGTAACGCGTATGCAACTTGCCTCACAGAGGAGAATAACCCGGAGAAATCCGGACTAATGCTCCATACACTCTTTAGCACGCCTGTGCGTAAGAGGAAAGATTTATCGCTGTGAGATAGGCATGCGTCCTATTAGGTAGTTGGTGAGGTAACGGCTCACCAAGCCGACGATAGGTAGGGGTGCTGAGAGGCAGATCCCCCACATTGGGACTGAGACACGGCCCAA	0	0	0	0	0	0	0	0	0	0	0	0	0	0	0	0	0	0	0	0	0	0	0	0	0	0	0	0	0	0	0	0	0	0	0	0	0	0	0	0	0	0	33	0	0	0	0	0
636	GATGAACGCTGGCGGCGTGCCTAATACATGCAAGTCGAGCGAACAGACGAGGAGCTTGCTCCTCTGATGTTAGCGGCGGACGGGTGAGTAACACGTGGATAACCTACCTATAAGACTGGGATAACTTCGGGAAACCGGAGCTAATACCGGATAACATGTTGAACCGCATGGTTCAACAGTGAAAGACGGTCTTGCTGTCACTTATAGATGGATCCGCGCCGCATTAGCTAGTTGGTAAGGTAACGGCTTACCAAGGCAACGATGCGTAGCCGACCTGAGAGGGTGATCGGCCACACTGGAACTGAGACACGGTCCAG	0	0	0	0	0	0	0	0	0	0	0	0	0	0	0	0	0	0	0	0	0	0	0	0	0	0	0	0	0	0	0	0	0	0	0	0	0	0	0	0	0	0	0	0	0	0	0	0
637	GATGAACGCTGGCGGCGTGCTTAACACATGCAAGTCGAACGGGATCCATCAAGCTTGCTTGGTGGTGAGAGTGGCGAACGGGTGAGTAATGCGTGACCGACCTGCCCCATGCTCCGGAATAGCTCCTGGAAACGGGTGGTAATGCCGGATGTTCCACATGATCGCATGTGATTGTGGGAAAGATTCTATCGGCGTGGGATGGGGTCGCGTCCTATCAGCTTGTTGGTGAGGTAACGGCTCACCAAGGCTTCGACGGGTAGCCGGCCTGAGAGGGCGACCGGCCACATTGGGACTGAGATACGGCCCAG	0	0	0	0	0	0	0	0	0	0	0	0	0	0	0	0	0	0	0	32	0	0	0	0	0	0	427	0	0	0	0	0	0	0	0	0	8	26	0	0	0	0	0	0	0	0	0	0
638	GACGAACGCTGGCGGCGCGCCTAACACATGCAAGTCGAACGAGCGAGAGAGAGCTTGCTTTCTCGAGCGAGTGGCGAACGGGTGAGTAACGCGTGAGGAACCTGCCTCAAAGAGGGGGACAACAGTTGGAAACGACTGCTAATACCGCATAAGCCCACGACCCGGCATCGGGTAGAGGGAAAAGGAGCAATCCGCTTTGAGATGGCCTCGCGTCCGATTAGCTAGTTGGTGAGGTAACGGCCCACCAAGGCGACGATCGGTAGCCGGACTGAGAGGTTGAACGGCCACATTGGGACTGAGACACGGCCCAG	0	0	0	0	0	0	0	0	0	0	0	0	0	0	0	0	0	0	0	40	0	0	0	0	0	0	0	0	0	0	0	0	0	0	0	0	0	0	0	0	0	0	0	0	0	0	0	0
639	GATGAACGCTGGCGGCGTGCTTAACACATGCAAGTCGAACGGAAAGGCTCCTGCTTGCAGGGGTACTCGAGTGGCGAACGGGTGAGTAACACGTGGGTGATCTGCCCTGTACTTCGGGATAAGCTTGGGAAACTGGGTCTAATACCGGATAGGACAACTTTTTGGATATTGTTGTGGAAAGCTTTTGCGGTATGGGATGAGCTCGCGGCCTATCAGCTTGTTGGTGGGGTAATGGCCTACCAAGGCGTCGACGGGTAGCCGGCCTGAGAGGGTGTACGGCCACATTGGGACTGAGATACGGCCCAG	0	0	0	0	143	0	0	0	0	0	0	0	0	0	0	0	0	0	0	0	0	0	0	0	0	0	0	0	0	0	0	0	0	0	0	0	0	0	0	0	0	0	0	24	10	0	0	0
640	AATGAACGCTGGCGGCGTGCCTAACACATGCAAGTCGGATGTGCCGCAAGGTGCATGGCAGACGGGTGAGTAACGCGTGGGGAATCTACCTCTTTGTGGGGAATAACGCTCCGAAAGGAGTGGTAATACCGCATGAGATCCAAGACTGGGATGTTTTGGATGAAACCTGGGGACCGCAAGGCCTGGGGCAAGGAGAGGATCCTGCGTCTGATTAGCTAGTTGGTGAGGTAATGGCCCACCAAGGCGACGATCAGTAGCCGGCCTGAGAGGGTGATCGGCCACACTGGAACTGAGACACGGTCCAG	0	0	0	0	0	0	0	0	0	0	0	0	0	0	0	0	0	0	0	0	0	0	0	0	0	0	0	0	0	0	0	0	0	0	0	0	0	0	0	0	0	0	0	0	0	0	0	0
641	ATTGAACGCTGGCGGCATGCTTTACACATGCAAGTCGAACGGCAGCGCGGGCTTCGGCCTGGCGGCGAGTGGCGAACGGGTGAGTAATACATCGGAACGTGCCCAGTAGTGGGGGATAGCTCGGCGAAAGCCGGATTAATACCGCATACGACCTGAGGGTGAAAGCGGGGGATCTTCGGACCTCGCGCTATTGGAGCGGCCGATGGCAGATTAGCTAGTTGGTGGGGTAAAGGCCTACCAAGGCGACGATCTGTAGCTGGTCTGAGAGGACGACCAGCCACACTGGGACTGAGACACGGCCCAG	0	0	0	0	0	0	0	0	3	0	0	0	0	686	0	0	0	0	0	13	0	0	0	0	0	0	0	0	0	0	0	0	0	0	0	0	0	0	0	0	0	0	0	0	0	0	0	0
642	GATGAACGCTGGCGGCGTGCCTAATACATGCAAGTCGAGCGAACAGACGAGGAGCTTGCTCCTTTGACGTTAGCGGCGGACGGGTGAGTAACACGTAGGTAACCTACCTATAAGACTGGGATAACTTCGGGAAACCGGAGCTAATACCGGATAATATTTCGAACCGCATGGTTCGATAGTAAAAGATGGCTTTGCTATCACTTATAGATGGACCTGCGCCGTATTAGCTAGTTGGTAAGGTAACGGCTTACCAAGGCAACGATACGTAGCCGACCTGAGAGGGTGATCGGCCACACTGGAACTGAGACACGGTCCAG	0	0	0	0	0	0	0	0	0	0	0	0	0	0	0	0	0	0	0	0	0	55	54	0	0	0	0	0	0	0	0	0	0	0	0	0	0	0	0	0	0	0	0	0	0	0	0	0
643	GACGAACGCTGGCGGCGCGCCTAACACATGCAAGTCGAACGAGCGAGAGAGAGCTTGCTTTCTCGAGCGAGTGGCGAACGGGTGAGTAACGCGTGAGGAACCTGCCTCAAAGAGGGGGACAACAGTTGGAAACGACTGCTAATACCGCATAAGCCCACGGCTCGGCATCGAGCAGAGGGAAAAGGAGCAATCCGCTTTGAGATGGCCTCGCGTCCGATTAGCTAGTTGGTGAGGTAACGGCCCACCAAGGCGACGATCGGTAGCCGGACTGAGAGGTTGAACGGCCACATTGGGACTGAGACACGGCCCAG	0	0	0	0	0	0	0	0	0	0	0	0	0	0	0	0	0	0	0	13	0	0	0	0	0	0	0	0	0	0	0	0	0	0	0	0	0	0	0	0	0	0	0	0	0	0	0	0
644	GATGAACGCTAGCTACAGGCTTAACACATGCAAGTCGAGGGGCAGCATGACCTAGCAATAGGTTGATGGCGACCGGCGCACGGGTGAGTAACACGTATCCAACCTACCGGTTATTCCGGGATAGCCTTTCGAAAGAAAGATTAATACCGGATAGTATAACGAGAAGGCATCTTTTTGTTATTAAAGAATTTCGATAACCGATGGGGATGCGTTCCATTAGTTTGTTGGCGGGGTAACGGCCCACCAAGACATCGATGGATAGGGGTTCTGAGAGGAAGGTCCCCCACATTGGAACTGAGACACGGTCCAA	0	0	0	0	0	0	0	0	0	0	0	0	0	0	0	0	0	0	0	0	0	0	0	0	0	16	0	0	0	0	0	0	0	0	0	0	0	0	0	0	0	0	0	0	0	0	0	0
645	GATGAACGCTGGCGGCGTGCCTAATACATGCAAGTCGAACGCTTCACTTCGGTGAAGAGTGGCGAACGGGTGAGTAATACATAAGTAACCTGGCATCTACAGGGGGATAACTGATGGAAACGTCAGCTAAGACCGCATAGGTGTAGAGATCGCATGAACTCTATATGAAAAGTGCTACGGGACTGGTAGATGATGGACTTATGGCGCATTAGCTTGTTGGTAGGGTAACGGCCTACCAAGGCGACGATGCGTAGCCGACCTGAGAGGGTGACCGGCCACACTGGGACTGAGACACGGCCCAG	0	0	0	0	0	0	0	0	0	0	0	0	0	0	0	0	0	0	0	31	0	0	0	0	0	0	0	0	0	0	0	0	0	0	0	0	0	0	0	0	0	0	0	0	0	0	0	0
646	GATGAACGCTAGCTATAGGCTTAACACATGCAAGTCGAGGGGAAACGGCAAAGAGTGCTTGCACCCTTTGGACGTCGACCGGCGCACGGGTGAGTAACGCGTATCCAACCTGCCCTTTACTTGGGGATAACCCGTTGAAAGACGGACTAATACCCAATGATATTCATTGATGACATCTGATTTGAATTAAAGATTTATCGGTATAGGATGGGGATGCGTCTGATTAGCTTGTTGGTGAGGTAACGGCTCACCAAGGCAACGATCAGTAGGGGTTCTGAGAGGAAGGTCCCCCACATTGGAACTGAGACACGGTCCAA	0	0	0	0	0	0	0	0	0	0	0	0	0	0	0	0	0	0	0	0	0	0	0	0	11	0	0	0	0	0	0	0	0	0	0	0	9	0	0	0	0	0	0	0	0	0	0	0
647	GACGAACGCTGGCGGCGTGCTTAACACATGCAAGTCGAACGGAAAGGCCCCTTCGGGGGTACTCGAGTGGCGAACGGGTGAGTAACACGTGAGTAACCTGCCCTTGACTTCGGGATAACTTCAGGAAACTGGGGCTAATACCGGATAGGAATCCTTGCTGCATGGTGGGGGTTGGAAAGCTTCGGCGGTTTTGGATGGACTCGCGGCTTATCAGCTTGTTGGTGGGGTAGTGGCTTACCAAGGCTTTGACGGGTAGCCGGCCTGAGAGGGCGACCGGCCACATTGGGACTGAGATACGGCCCAG	0	0	0	0	0	0	0	0	0	0	0	0	0	0	0	0	0	0	0	0	0	0	0	0	0	0	0	0	0	0	0	0	0	0	0	0	30	8	0	0	0	0	0	0	0	0	0	0
648	GATGAACGCTAGCTACAGGCTTAACACATGCAAGTCGAGGGGAAACGGCATCAAGCGCTTGCGCCTGATGGACGTCGACCGGCGCACGGGTGAGTAACGCGTATCCAACCTGCCCTACACTAAGGGATAACCCGCAGAAATGTGGACTAATACCTTATATTTTCCACCAAGGGCATCGTCGATGGAACAAAGATTTATCGGTATGGGATGGGGATGCGTCCGATTAGGTTGTTGGCGGGGTAACGGCCCACCAAGCCTTCGATCGGTAGGGGTTCTGAGAGGAAGGTCCCCCACATAGGAACTGAGACACGGTCCTA	0	0	0	0	0	0	0	0	0	0	0	0	0	0	0	0	0	0	0	0	0	0	0	0	0	0	0	0	0	0	0	0	0	0	0	0	0	0	0	0	0	0	0	0	0	0	0	0
649	GATTAACGCTGGCGGCGTGCATAACACATGCAAGTCGAACGATGAAACTTAGTAGACTTCTTCGGAAAGACACTAAGCGGATTAGTGGCGAACGGGTGAGTAACGCGTGAGTAACCTGCCTTACACAAGGGGATAGCCTTTGGAAACGAAGAATAATACCCTATAAAACCATAAAAGCACATGCTAGAATGGTCAAAGTGATAGCGGTGTAAGATGGACTTGCGTCTGATTAGCTAGTTGGTGAGATAAAAGCTCACCAAGGCAACGATCAGTAGCCGGCTTGAGAGAGTGTACGGCCACATTGGGACTGAGACACGGCCCAG	0	0	0	0	0	0	0	440	0	0	0	0	0	0	0	0	0	0	0	0	0	0	0	0	0	0	0	0	0	0	0	0	0	0	0	0	0	0	0	0	0	9	0	0	4	0	0	0
650	GATTAACGCTGGCGGCGTGCATAACACATGCAAGTCGAACGATGAAACTTTTTTGATTTCTTCGGAATGAAAAAAAGTGGATTAGTGGCGGACGGGTGAGTAACGCGTGAGTAACCTGCCTTAGAGAAGGGGATAGCCTTTGGAAACGAAGAATAATACCCTATGAAACCATAACCTCGCATGAGGCCTTGGTCAAAGATTTATCGCTCTAAGATGGACTTGCGTCTGATTAGTTAGTTGGTGGGGTAACGGCCCACCAAGACAGCGATCAGTAGCCGGCTTGAGAGAGTGTACGGCCACATTGGGACTGAGACACGGCCCAG	0	0	0	70	2	0	300	0	0	0	0	0	0	0	0	0	0	0	0	0	0	0	0	0	0	0	0	0	0	0	0	0	0	0	0	0	0	0	0	0	0	0	2	0	0	0	56	0
651	GATGAACGCCGGCGGTGTGCCTAATACATGCAAGTCGAGCGCACTGGCCCAACTGATATGATGTGCTTGCACTGAATTGACGTTGGATTCCCGGTGAGCGGCGGACGGGTGAGTAACACGTGGGCAACCTGCCCTGAAGCAGGGGATAACATCTGGAAACAGGTGCTAATACCGCATAACAACGAAAACCACATGGTTTTCGTTTTAAAGATGGTTTCGGCTATCACTTCAGGATGGGCCCGCGGTGCATTAGCTAGTTGGTAAGGTAACGGCTTACCAAGGCGATGATGCATAGCCGAGTTGAGAGACTGATCGGCCACAATGGAACTGAGACACGGTCCAT	0	0	0	0	0	0	0	0	0	0	0	0	0	0	0	0	0	241	44	0	0	0	0	0	0	0	0	0	0	0	0	0	0	0	0	0	0	0	0	0	0	0	0	0	0	0	0	0
652	GACGAACGCTGGCGGCGTGCTTAACACATGCAAGTCGAACGATGAACTGGAGCTTGCTCCAGGGATTAGTGGCGAACGGGTGAGTAACACGTGAGTAACCTGCCCTTGACTCTGGGATAAGCGCTAGAAATGGCGTCTAATACCGGATACGAGCTTCAGCCGCATGGCTAGGAGTTGGAAAGAATTTTGGTCAAGGATGGACTCGCGGCCTATCAGCTAGTTGGTGAGGTAATGGCTCACCAAGGCGACGACGGGTAGCCGGCCTGAGAGGGTGACCGGCCACACTGGGACTGAGACACGGCCCAG	0	0	0	0	0	0	0	0	0	0	0	0	0	0	0	734	0	0	0	0	0	0	0	0	0	0	0	0	0	0	0	0	0	0	0	0	0	0	0	0	0	0	0	0	0	0	0	0
653	GACGAACGCTGGCGGCGTGCCTAATACATGCAAGTAGGACGCACAGTTTATACCGTAGCTTGCTACACCATAGACTGTGAGTTGCGAACGGGTGAGTAACGCGTAGGTAACCTGCCTATTAGAGGGGGATAACTATTGGAAACGATAGCTAATACCGCATAACAGTATGTAACACATGTTAGATGCTTGAAAGATGCAATTGCATCGCTAGTAGATGGACCTGCGTTGTATTAGCTAGTAGGTAGGGTAATGGCCTACCTAGGCGACGATACATAGCCGACCTGAGAGGGTGATCGGCCACACTGGGACTGAGACACGGCCCAG	0	0	0	0	0	0	0	0	0	0	0	0	0	0	0	0	0	0	0	160	0	0	0	0	0	129	0	0	0	0	0	0	0	0	0	0	0	0	0	0	0	0	0	0	0	0	0	0
654	GATAAACGCTGGCGGCGTGCATAACACATGCAAGTCGAACGATGAAGCTTAGATGATTTCTTCGGAATGAACTTAAGTGGATTAGTGGCGAACGGGTGAGTAACACGTGAGTAACCTGCCTTACACAAGGGGATAGCCTCTGGAAACGGAGAATAATACCCTATAAAGTCTAATCAGCTCCTGCTGGAAAGACCAAAGATTTATCGGTGTAAGATGGACTTGCGTCTGATTAGCTAGTTGGTGAGATAAAAGCTCACCAAGGCGACGATCAGTAGCCGGCTTGAGAGAGTGTACGGCCACATTGGGACTGAGACACGGCCCAA	0	0	0	0	0	0	0	0	0	0	0	0	0	0	0	0	0	0	0	0	0	0	0	0	0	0	0	0	0	0	0	0	0	0	0	0	0	0	0	0	0	0	0	0	0	0	0	0
655	GACGAACGCTGGCGGCGTGCCTAATACATGCAAGTCGAACGCTTCTTTCCTCCCGAGTGCTTGCACTCGATTGGAAAGAGGAGTGGCGGACGGGTGAGTAACACGTGGGTAACCTACCCATCAGAGGGGGATAACACTTGGAAACAGGTGCTAATACCGCATAACAGTTTATGCCGCATGGCATAAGAGTGAAAGGCGCTTTCGGGTGTCGCTGATGGATGGACCCGCGGTGCATTAGCTAGTTGGTGAGGTAACGGCTCACCAAGGCCACGATGCATAGCCGACCTGAGAGGGTGATCGGCCACACTGGGACTGAGGCACGGCCCAG	0	0	0	0	0	0	0	0	0	0	0	0	0	0	0	0	0	0	0	0	0	0	0	0	0	0	0	0	0	0	0	0	0	0	0	0	0	0	0	0	0	0	0	0	0	0	0	0
656	GACGAACGCTGGCGGCGTGCTTAACACATGCAAGTCGAACGATGAAGCCTAGCTTGCTAGGTGGATTAGTGGCGAACGGGTGAGTAATACGTGAGTAACCTACCTTTAACTCTGGGATAAGCCTGGGAAACTGGGTCTAATACCGGATACGACCAATCTCCGCATGGGGTGTTGGTGGAAAGCGTTATGTAGTGGTTATAGATGGGCTCACGGCCTATCAGCTTGTTGGTGAGGTAATGGCTCACCAAGGCGACGACGGGTAGCCGGCCTGAGAGGGTGACCGGCCACACTGGGACTGAGACACGGCCCAG	0	0	0	0	0	0	0	2	0	0	0	0	0	0	0	0	0	0	0	0	0	0	0	0	0	0	0	0	0	0	0	0	0	0	0	0	0	0	0	0	0	0	0	0	0	0	0	0
657	GATGAACGCTGGCGGCGTGCCTAATACATGCAAGTCGAGCGGTAAGGCCTCTTCGGAGGTACACGAGCGGCGGACGGCTGAGTAACACGTAGGAACGTACCCCAAACTGAGGGATAAGCACCAGAAATGGTGTCTAATACCGCATGTGCTCTAAGGAGTAAAGCTTCGGCGGTTTGGGAGCGGCCTGCGTCTGATTAGCTAGATGGTGAGGTAATGGCTCACCATGGCGACGATCAGTAGCTGGTCTGAGAGGATGATCAGCCAGACTGGGACTGAGACACGGCCCAG	0	0	0	0	0	0	0	0	43	0	0	0	0	171	0	0	0	0	0	0	0	0	0	0	0	0	0	0	0	0	0	0	0	0	0	0	0	0	0	16	0	0	0	0	6	0	70	0
658	GATGAACGCTGACAGAATGCTTAACACATGCAAGTCTTTGGCGAAGCTGCGCTTGCGCAGTCTAGCCAAGGCGGACGGGTGAGTAACGCGTAAGGAACTTGCCCTGCAGACAGGGATAACAGACGGAAACGACTGATAACACCTGGTATTGTCAGGCTGGCGCATGCCGGCCTGATGAAAGGAGACGCTGCAGGAGAGCCTTGCGTCCTATTAGCTAGTTGGTGGGGTAACGGCCCACCAAGGCGATGATAGGTAGCCGGCCTGAGAGGGTGAACGGCCACAAGGGGACTGAGATACGGCCCTT	0	0	0	0	0	0	0	0	0	0	0	0	0	0	0	0	0	0	0	0	0	0	0	0	0	0	0	0	0	0	0	0	0	0	0	0	0	0	0	0	0	0	0	0	0	0	0	0
659	GACGAACGCTGGCGGCGTGCCTAATACATGCAAGTAGAACGCTGAAGGAGGAGCTTGCTTCTCTGGATGAGTTGCGAACGGGTGAGTAACGCGTAGGTAACCTGCCTGGTAGCGGGGGATAACTATTGGAAACGATAGCTAATACCGCATAAGAGTAGATGTTGCATGACATTTGCTTAAAAGGTGCAATTGCATCACTACCAGATGGACCTGCGTTGTATTAGCTAGTTGGTGAGGTAACGGCTCACCAAGGCGACGATACATAGCCGACCTGAGAGGGTGATCGGCCACACTGGGACTGAGACACGGCCCAG	0	204	0	0	0	0	0	0	0	0	0	0	0	0	0	0	0	0	0	0	0	0	0	0	0	0	0	0	0	0	0	0	0	0	0	0	0	0	0	0	0	0	0	0	0	0	0	0
660	GATGAACGCTGGCGGCGTGCTTAACACATGCAAGTCGAACGAGAGATACAGGAGGAAGTTTTCGGATGGAATCCGGTAGATCGAGTGGCGGACGGGTGAGTAACGCGTGGGGAACCTGCCTCATACAGGGGGATAACAGTTGGAAACGACTGTTAATACCGCATAAGACCACAGAGTCGCATGACTCAGGGGTAAAAACTCCGGTGGTATGAGATGGACCCGCGTTCGATTAGCCAGTTGGCGGGGTAACGGCCCACCAAAGCGACGATCGATAGCCGATTTGAGAGAATGACCGGCCACATTGGGACTGAGACACGGCCCAA	0	0	0	0	0	0	0	0	0	0	0	0	0	0	0	0	0	0	0	0	0	0	0	0	0	0	0	0	0	0	0	0	0	0	0	0	0	0	0	0	0	0	0	0	0	0	0	0
661	ATTGAACGCTGGCGGCATGCTTTACACATGCAAGTCGAACGGCAGCGCGGGGAGCTTGCTCCCTGGCGGCGAGTGGCGCACGGGTGAGTAATACATCGGAACGTGTCTTCTAGTGGGGGATAACTGCCCGAAAGGGCAGCTAATACCGCATGAGACCTGAGGGTGAAAGCGGGGGATCGCAAGACCTCGCGCTGGAAGAGCGGCCGATGTCCGATTAGCTAGTTGGTGAGGTAAAGGCTCACCAAGGCGACGATCGGTAGCTGGTCTGAGAGGACGACCAGCCACACTGGGACTGAGACACGGCCCAG	0	0	0	0	0	0	0	0	0	0	0	0	0	0	0	0	0	0	0	28	0	0	0	0	0	5	0	0	0	0	0	0	0	0	0	0	0	0	0	0	0	0	0	0	0	0	0	0
662	GACGAACGCTGGCGGCGTGCCTAATACATGCAAGTAGAACGCTGAAGGAGGAGCTTGCTCTTCTGGATGAGTTGCGAACGGGTGAGTAACGCGTAGGTAACCTGCCTGGTAGCGGGGGATAACTATTGGAAACGATAGCTAATACCGCATAAGAGTAGATGTTGCATGACATTTACTTAAAAGGTGCAATTGCATCACTACCAGATGGACCTGCGTTGTATTAGCTAGTTGGTGGGGTAACGGCTCACCAAGGCGACGATACATAGCCGACCTGAGAGGGTGATCGGCCACACTGGGACTGAGACACGGCCCAG	0	0	0	0	0	0	0	0	0	0	0	0	0	0	0	388	0	0	0	0	0	0	0	0	0	64	0	0	0	0	0	0	0	0	0	0	0	0	0	0	0	0	0	0	0	0	0	0
663	AACGAACGCTGGCGGCAGGCCTAACACATGCAAGTCGAGCGAGGACTTCGGTTCTAGCGGCGGACGGGTGAGTAACGCGTGGGAATGTGCCCTTCTCTACGGAATAGCCCTGGGAAACTGGGAGTAATACCGTATACGCCCTATTGGGGAAAGATTTATCGGAGAAGGATCAGCCCGCGTTGGATTAGGTAGTTGGTGGGGTAATGGCCTACCAAGCCGACGATCCATAGCTGGTTTGAGAGGATGATCAGCCACACTGGGACTGAGACACGGCCCAG	0	0	0	0	0	0	0	0	0	0	0	0	0	0	0	0	0	0	0	0	0	0	0	0	0	0	0	0	0	0	0	0	0	0	0	0	0	0	0	0	0	0	0	0	0	0	0	0
664	GATTAACGCTGGCGGCGTGCATAACACATGCAAGTCGAACGATGAAACTTTTATGAATTCTTCGGAATGATTAAAAGTGGATTAGTGGCGGACGGGTGAGTAACGCGTGAGTAACCTGCCTTAGAGAAGGGGATAGCCGTTGGAAACGACGAATAATACCCTATGAAATAAACACCTCGCATGAGGAGTTTATCAAAGATTTATCGCTCTAAGATGGACTCGCGTCTGATTAGCTAGTTGGTGAGGTAACGGCCCACCAAGGCAACGATCAGTAGCCGGCTTGAGAGAGTGTACGGCCACATTGGGACTGAGACACGGCCCAG	0	0	0	0	0	0	0	0	0	0	0	0	0	0	0	0	0	0	0	0	0	0	0	0	0	0	0	0	236	0	0	0	0	0	0	0	0	0	0	0	0	0	0	0	0	0	0	0
665	GATGAACGCTAGCTACAGGCTTAACACATGCAAGTCGCAGGGTAACATGAGGAAAGCTTGCTTTCCTTGATGACGACTGGCGCACGGGTGAGTAACGCGTATCCAACCTTCCCATAACTACGGGATAACCCATTGAAAGACGGCCTAATACCGTATGATATCGTTTGCTGACATCAAATAACGATTAAAGGTTTAGCGGTTATGGATGGGGATGCGTCTGATTAGCTTGTTGGCGGGGTAACGGCCCACCAAGGCGACGATCAGTAGGGGTTCTGAGAGGAAGGTCCCCCACATTGGAACTGAGACACGGTCCAA	0	0	0	0	0	0	0	0	0	0	0	0	0	0	0	0	0	0	0	0	0	0	0	0	0	0	0	0	0	0	0	0	0	0	0	0	0	0	0	0	0	0	0	0	0	0	0	0
666	GACGAACGCTGGCGGCGTGCCTAATACATGCAAGTAGAACGCTGAAGGAGGAGCTTGCTTCTCTGGATGAGTTGCGAACGGGTGAGTAACGCGTAGGTAACCTGCCTGGTAGCGGGGGATAACTATTGGAAACGATAGCTAATACCGCATAATATTGATTATTGCATGATAGTCAATTAAAAGGTGCAATTGCATCACTACCAGATGGACCTGCGTTGTATTAGCTAGTTGGTGAGGTAACGGCTCACCAAGGCAACGATACATAGCCGACCTGAGAGGGTGATCGGCCACACTGGGACTGAGACACGGCCCAG	0	0	0	0	0	0	0	0	0	0	0	0	0	0	0	0	0	0	0	0	0	0	0	0	0	0	0	0	0	0	0	0	0	0	0	0	0	0	0	0	0	0	0	0	0	0	0	0
667	ATTGAACGCTGGCGGCATGCCTTACACATGCAAGTCGAACGGCAGCGCGGACTTCGGTCTGGCGGCGAGTGGCGAACGGGTGAGTAATACATCGGAACGTACCCTGTTGTGGGGGATAACTAGTCGAAAGATTAGCTAATACCGCATACGACCTGAGGGTGAAAGTGGGGGACCGCAAGGCCTCACGCAGCAGGAGCGGCCGATGTCTGATTAGCTAGTTGGTGGGGTAAAGGCCCACCAAGGCGACGATCAGTAGCTGGTCTGAGAGGACGATCAGCCACACTGGGACTGAGACACGGCCCAG	0	0	0	0	0	0	0	0	0	0	0	0	0	0	0	0	0	0	0	0	0	0	0	0	0	0	0	0	0	0	0	0	0	0	0	0	0	0	0	0	0	0	0	0	0	0	0	0
668	GACGAACGCTGGCGGCGTGCTTAACACATGCAAGTCGAACGAAGAGCGATGGAAGCTTGCTTCTATCAATCTTAGTGGCGAACGGGTGAGTAACGCGTAATCAACCTGCCCTTCAGAGGGGGACAACAGTTGGAAACGACTGCTAATACCGCATACGATCTAACCTCGGCATCGAGGATAGATGAAAGGTGGCCTCTACATGTAAGCTATCACTGAAGGAGGGGATTGCGTCTGATTAGCTAGTTGGAGGGGTAACGGCCCACCAAGGCGATGATCAGTAGCCGGTCTGAGAGGATGAACGGCCACATTGGGACTGAGACACGGCCCAG	0	0	0	0	0	0	0	0	0	0	0	0	0	0	0	0	0	0	0	0	0	0	0	0	0	0	0	0	0	0	0	0	0	0	0	0	0	0	0	0	0	0	0	0	0	0	0	0
669	ATTGAACGCTGGCGGCATGCTTTACACATGCAAGTCGAACGGTAACAGGGAGCTTGCTCCGCTGACGAGTGGCGAACGGGTGAGTAATATATCGGAACGTACCCAAGAGTGGGGGATAACGTAGCGAAAGTTACGCTAATACCGCATACGATCTAAGGATGAAAGCAGGGGATCTTCGGACCTTGTGCTCCTGGAGCGGCCGATATCTGATTAGCTAGTTGGTGAGGTAAAGGCTCACCAAGGCGACGATCAGTAGCTGGTCTGAGAGGACGACCAGCCACACTGGAACTGAGACACGGTCCAG	0	0	0	0	0	0	0	0	0	0	0	0	0	0	0	0	0	0	0	0	0	0	0	0	0	0	0	0	0	0	0	0	0	0	0	0	0	0	0	0	0	0	0	0	0	0	0	0
670	GACGAACGCTGGCGGCGTGCCTAATACATGCAAGTCGAACGAACAGCGACTTGAACTTGTTCAAGTCAATGTTAGTGGCGCACGGGTGAGTAACACGTGGAGAACCTACCCTTAAGCGGGGGATAACCATTGGAAACGATGACTAATACCGCATAGAATCACAGATCGCATGATCAATGAAGGAAAGACGGCTTCGGCTGTCACTTAAGGATGGCTCCGCGGTGCATTAGCTAGATGGTGGGGTAAAGGCCTACCATGGCAATGATGCATAGCCGACCTGAGAGGGTGATCGGCCACATTGGGACTGAGACACGGCCCAA	0	0	0	0	0	0	0	0	0	0	0	0	0	0	0	0	0	0	0	0	0	0	0	0	0	0	0	0	0	0	0	0	0	0	0	0	0	0	0	85	0	0	7	0	0	0	0	0
671	GATTAACGCTGGCGGCATGCCTAATACATGCAAATCGAACGAAGCCTTTTAGGCTTAGTGGTGAACGGGTGAGTAACACGTATCCAATCTACCCTTAAGTTGGGGATAACTAGTCGAAAGATTAGCTAATACCGAATAATAACATCAATATCGCATGAGAAGATGTAGAAAGTCGCTCTTTGTGGCGACGCTTTTGGATGAGGGTGCGATGTATCAGATAGTTGGTGAGGTAATGGCTCACCAAGTCAATGACGCGTAGCTGTACTGAGAGGTAGAACAGCCACAATGGGACTGAGACACGGCCCAT	0	0	0	0	0	0	0	0	0	0	0	0	0	0	0	0	0	0	0	0	0	0	0	0	0	0	0	0	0	0	0	0	0	0	0	0	0	0	0	0	0	0	0	0	0	0	0	0
672	GACGAACGCTGGCGGCGCGCCTAACACATGCAAGTCGAACGAGCGAGAGAGAGCTTGCTTTCTCGAGCGAGTGGCGAACGGGTGAGTAACGCGTGAGGAACCTGCCTCAAAGAGGGGGACAACAGTTGGAAACGACTGCTAATACCGCATAAGCCCACGGTGCCGCATGGCACAGAGGGAAAAGGAGCAATCCGCTTTGAGATGGCCTCGCGTCCGATTAGCTAGTTGGTGAGGTAACGGCCCACCAAGGCGACGATCGGTAGCCGGACTGAGAGGTTGAACGGCCACATTGGGACTGAGACACGGCCCAG	0	0	0	0	0	0	0	0	0	0	0	0	0	0	0	0	0	0	0	0	0	0	0	0	0	0	0	0	0	0	0	0	0	0	0	0	0	0	0	0	0	0	0	0	0	0	0	0
673	ATTGAACGCTGGCGGCATGCCTTACACATGCAAGTCGAACGGCAGCGGGCCCTTCGGGGTGCCGGCGAGTGGCGAACGGGTGAGTAATGCATCGGAACGTACCCGGGAGTGGGGGATAACCGGCCGAAAGGCTGGCTAATACCGCATGAACTCGGAAGAGCAAAGCGGGGGACCTTCGGGCCTCGCGCTCTCGGAGCGGCCGATGTCCGATTAGCTCGTTGGTGAGGTAAAGGCTCACCAAGGCGACGATCGGTAGCGGGTCTGAGAGGACGATCCGCCACACTGGGACTGAGACACGGCCCAG	0	0	0	0	0	0	0	0	0	0	0	0	0	0	0	0	0	0	0	0	0	0	0	0	0	0	0	0	0	0	0	0	0	0	0	0	0	0	0	0	0	0	0	0	0	0	0	0
674	AGCGAACGCTGGCGGCATGCCTAACACATGCAAGTCGCGCGGGCGGTCTTCGGATCGTCAGCGGCGGACGGGTGAGTAGCGCGTAGGAACGTGTCCGGAGGTGGGGGACAACCCTGGGAAACCGGGGCTAATACCGCACGACCCCCGAGGGGGAAAGCCGCGAGGCGCCTCCGGAGCGGCCTGCGTCCGATTAGCTCGTTGGCGGGGTAACGGCCCACCAAGGCTCCGATCGGTAGCTGGTCTGAGAGGACGATCAGCCACACTGGGACTGAGACACGGCCCAG	0	0	0	0	0	0	0	0	0	0	0	0	0	707	0	0	0	0	0	0	0	0	0	0	0	0	0	0	0	0	0	0	0	0	0	0	0	0	0	0	0	0	0	0	0	0	0	0
675	GACGAACGCTGGCGGCGCGCCTAACACATGCAAGTCGAACGAGCGAGAGAGAGCTTGCTTTCTCGAGCGAGTGGCGAACGGGTGAGTAACGCGTGAGGAACCTGCCTCAAAGAGGGGGACAACAGTTGGAAACGACTGCTAATACCGCATAAGCCCACGGCTCGGCATCGAGCAGAGGGAAAAGGAGCAATCCGCTTTGAGATGGCCTCGCGTCCGATTAGCTAGTTGGTGAGGTAACGGCCCACCAAGGCAACGATCGGTAGCCGGACTGAGAGGTTGAACGGCCACATTGGGACTGAGACACGGCCCAG	0	0	0	0	0	0	0	0	0	0	0	0	0	0	0	0	0	0	0	26	0	0	0	0	0	0	0	0	0	0	0	0	0	0	0	0	0	0	0	0	0	0	0	0	0	0	0	0
676	GATGAACGCTGGCGGCGTGCTTAACACATGCAAGTCGAACGGGATCCCGGGGGTTCGCTCCCGGGTGAGAGTGGCGAACGGGTGAGTAATGCGTGACCGACCTGCCCCATACACCGGAATAGCTCCTGGAAACGGGTGGTAATGCCGGATGCTCCGGTTGGATGCATGTCCTTCCGGGAAAGATTCCATCGGTATGGGATGGGGTCGCGTCCTATCAGCTTGATGGCGGGGTAACGGCCCACCATGGCTTCGACGGGTAGCCGGCCTGAGAGGGCGACCGGCCACATTGGGACTGAGATACGGCCCAG	0	0	0	0	0	0	0	0	0	0	0	0	0	0	0	0	0	0	0	0	0	0	0	0	0	25	0	0	0	0	0	0	0	0	0	0	0	0	0	0	0	0	0	0	0	0	0	0
677	GATGAACGCTAGCTATAGGCTTAACACATGCAAGTCGAGGGGCAGCGAATAGATAGCTTGCTATTTATGTCGGCGACCGGCGCACGGGTGAGTAACGCGTATCCAACCTGCCCATAACTAAGGGATAACCCAGCGAAAGTTGGACTAATACCTTATGTATTCGTTTGATCTCATGAGATTACGAATAAAGATTTATCGGTTATGGATGGGGATGCGTCTGATTAGCTTGTTGGCGGGGTAACGGCTCACCAAGGCAACGATCAGTAGGGGTTCTGAGAGGAAGGTCCCCCACATTGGAACTGAGACACGGTCCAA	0	0	0	0	0	0	0	0	0	0	0	0	0	0	0	0	0	0	0	0	0	0	0	0	0	0	0	0	0	0	0	0	0	0	0	0	0	0	0	0	0	0	0	0	0	0	0	0
678	GATTAACGCTGGCGGCGTGCATAACACATGCAAGTCGAACGATGAAACTTAAATGATTTCTTCGGAATGATTTTAAGTGGATTAGTGGCGGACGGGTGAGTAACGCGTGAGTAACCTGCCTTAGAGATGGGGATAGCCTCTGGAAACGGAGAATAATACCCAATGATACTAAGCTATCGCATGGTAGCCTAGTCAAAGATTTATCGCTCTAAGATGGACTTGCGTCTGATTAGCTAGTTGGTGAGATAATGGCTCACCAAGGCAACGATCAGTAGCCGGCTTGAGAGAGTGTACGGCCACATTGGGACTGAGACACGGCCCAG	0	0	0	0	0	0	0	0	0	0	0	0	0	0	0	0	0	0	0	0	0	0	0	0	0	0	0	0	0	0	0	0	0	0	0	0	0	0	0	0	0	0	0	0	0	0	0	0
679	GATAAACGCTGGCGGCGTGCATAACACATGCAAGTCGAACGATGAAACTTAGAAGATTTCTTCGGAATGAATTTAAGTGGATTAGTGGCGAACGGGTGAGTAACACGTGAGTAACCTGCCTTACACAAGGGGATAGCCTTTGGAAACGAAGAATAATACCCTATAAAGTCAATTTATCGCATGATAGAGTGACCAAAGATTTATCGGTGTAAGATGGACTTGCGTCTGATTAGCTAGTTGGTGAGATAAAAGCTCACCAAGGCGACGATCAGTAGCCGGCTTGAGAGAGTGTACGGCCACATTGGGACTGAGACACGGCCCAA	0	0	0	0	0	0	0	0	0	0	0	0	0	0	0	0	0	0	0	0	0	0	0	0	0	0	0	0	0	0	0	0	0	0	0	0	0	0	0	0	0	0	0	0	0	0	0	0
680	GATGAACGCCGGCGGTGTGCCTAATACATGCAAGTCGAGCGCACTGGCCCAACTGATATGACGTGCTTGCACTGAATTGACGTTGGATTCCCAGTGAGCGGCGGACGGGTGAGTAACACGTGGGCAACCTGCCCTGAAGCGGGGGATAACATCTGGAAACAGGTGCTAATACCGCATAACAACGAAAACCACATGGTTTTCGTTTCAAAGATGGCTTCGGCTATCACTTCAGGATAGGCCCGCGGTGCATTAGCTAGTTGGTAAGGTAACGGCTTACCAAGGCGATGATGCATAGCCGAGTTGAGAGACTGATCGGCCACAATGGAACTGAGACACGGTCCAT	0	0	0	0	0	0	0	0	0	0	0	0	96	0	0	0	0	160	34	0	0	0	0	0	0	0	0	0	0	0	0	0	0	0	0	0	0	0	0	0	0	0	0	0	0	0	0	0
681	GACGAACGCTGGCGGCGTGCCTAATACATGCAAGTCGAACGAAACTTTCTTACACCGAATGCTTGCATTCACCGTAAGAAGTTGAGTGGCGGACGGGTGAGTAACACGTGGGTAACCTGCCTAAAAGAAGGGGATAACACTTGGAAACAGGTGCTAATACCGTATATCTCTAAGGATCGCATGATCCTTAGATGAAAGATGGTTCTGCTATCGCTTTTAGATGGACCCGCGGCGTATTAACTAGTTGGTGGGGTAACGGCCTACCAAGGTGATGATACGTAGCCGAACTGAGAGGTTGATCGGCCACATTGGGACTGAGACACGGCCCAA	0	0	0	0	0	0	0	0	0	0	0	0	0	0	0	0	0	0	0	160	0	0	0	0	0	58	0	0	0	0	0	0	0	0	0	0	0	0	0	0	0	0	0	0	0	0	0	0
682	GATGAACGCTGGCGGCGTGCTTAACACATGCAAGTCGAACGGAAAGGCCAGTGCTTGCACTGGTACTCGAGTGGCGAACGGGTGAGTAACACGTGGGTGATCTGCCCCGCACTTCGGGATAAGCCTGGGAAACTGGGTCTAATACCGGATAGGACCACTTCTTGGAGGTTGTGGTGGAAAGTTTTTTCGGTGTGGGATGAGCTCGCGGCCTATCAGCTTGTTGGTGGGGTAATGGCCTACCAAGGCGTCGACGGGTAGCCGGCCTGAGAGGGTGTACGGCCACATTGGGACTGAGATACGGCCCAG	0	0	0	0	0	0	0	0	0	0	0	0	0	0	0	0	0	0	0	0	0	0	0	0	0	0	0	0	0	0	0	0	0	0	0	0	0	0	0	0	0	0	0	0	0	0	0	0
683	GACGAACGCTGGCGGCGCGCCTAACACATGCAAGTCGAACGAGCGAGAGAGAGCTTGCTTTCTCGAGCGAGTGGCGAACGGGTGAGTAACGCGTGAGGAACCTGCCTCAAAGAGGGGGACAACAGTTGGAAACGACTGCTAATACCGCATAAGCCCACGACCCGGCATCGGGTTGAGGGAAAAGGAGCAATCCGCTTTGAGATGGCCTCGCGTCCGATTAGCTAGTTGGTGAGGTAACGGCCCACCAAGGCGACGATCGGTAGCCGGACTGAGAGGTTGAACGGCCACATTGGGACTGAGACACGGCCCAG	0	0	0	0	0	0	0	0	0	0	0	0	0	0	0	0	0	0	0	0	0	0	0	0	0	0	0	0	0	0	0	0	0	0	0	0	0	0	0	0	0	0	0	0	0	0	0	0
684	GATTAACGCTGGCGGCGTGCATAACACATGCAAGTCGAACGATGAAACTTAAATGAACTCTTCGGGGTGATTTTAAGTGGATTAGTGGCGGACGGGTGAGTAACGCGTGAGTAACCTGCCTTAGAGAAGGGGATAGCCTTTGGAAACGAAGAATAATACCCTATAACACCAACACCTCGCATGAAGAGTTGGTCAAAGATTTATCGCTCTAAGATGGACTTGCGTCTGATTAGTTAGTTGGTGAGGTAACGGCCCACCAAGACAGCGATCAGTAGCCGGCTTGAGAGAGTGTACGGCCACATTGGGACTGAGACACGGCCCAG	0	0	0	0	0	0	0	0	0	0	0	0	0	0	0	0	0	0	0	0	0	0	0	0	0	0	0	0	0	0	0	0	0	0	0	0	0	0	0	0	0	0	0	0	0	0	0	0
685	GACGAACGCTGGCGGCGTGCTTAACACATGCAAGTCGAACGCACAGCACTGGCTTTGGTTGGTGTGGGTGAGTGGCGAACGGGTGAGTAATACGTGGGTAACCTGCCCTTCTTTTTGGGATAAGCCTTGGAAACGGGGTCTAATACTGGATATTCTGTTCCTGCCGCATGGTGGGTGTGGGAAAGTTTTTTCGAAGAGGGATGGGCTCGCGGCCTATCAGCTTGTTGGTGGGGTGATGGCCTACCAAGGCTTTGACGGGTAGCCGGCCTGAGAGGGTGGACGGCCACATTGGGACTGAGATACGGCCCAG	0	0	0	0	0	0	0	0	0	0	0	0	0	0	0	0	0	0	0	0	0	0	0	0	0	0	0	0	0	0	0	0	0	0	0	0	0	0	0	0	0	0	0	0	0	0	0	0
686	GACGAACGCTGGCGGCGTGCCTAATACATGCAAGTAGAACGCTGAAGGAGGAGCTTGCTTCTCCGGATGAGTTGCGAACGGGTGAGTAACGCGTAGGTAACCTGCCTGGTAGCGGGGGATAACTATTGGAAACGATAGCTAATACCGCATAACAGTAGATATTGCATGATATCTGCTTGAAAGGTGCAATTGCATCACTACCAGATGGACCTGCGTTGTATTAGCTAGTTGGTGAGGTAACGGCTCACCAAGGCGACGATACATAGCCGACCTGAGAGGGTGATCGGCCACACTGGGACTGAGACACGGCCCAG	0	0	0	0	0	0	0	0	0	0	0	0	0	0	0	0	0	0	0	0	0	0	0	0	0	41	0	0	0	0	0	0	0	0	0	0	0	0	0	0	0	0	0	0	0	0	0	0
687	GACGAACGCTGGCGGCGTGCCTAATACATGCAAGTAGAACGCTGAGGACTGGTGCTTGCACTGGTCTAAGGAGTTGCGAACGGGTGAGTAACGCGTAGGTAACCTACCTCATAGCGGGGGATAACTATTGGAAACGATAGCTAATACCGCATGACAATAGGGTACACATGTACCCAATTTAAAAGGGGCAAATGCTTCACTATGAGATGGACCTGCGTTGTATTAGCTAGTTGGTAAGGTAACGGCTTACCAAGGCGACGATACATAGCCGACCTGAGAGGGTGATCGGCCACACTGGGACTGAGACACGGCCCAG	0	0	0	0	0	0	0	0	0	0	0	0	0	0	0	0	0	0	0	0	0	0	0	0	0	0	0	0	0	0	0	0	0	0	0	0	0	0	0	0	0	0	0	0	0	0	0	0
688	ATTGAACGCTGGCGGCAGGCCTAACACATGCAAGTCGAACGGTAGCACAGAGAGCTTGCTCTCGGGTGACGAGTGGCGGACGGGTGAGTAATGTCTGGGAAACTGCCTGATGGAGGGGGATAACTACTGGAAACGGTAGCTAATACCGCATAACGTCGCAAGACCAAAGAGGGGGACCTTCGGGCCTCTTGCCATCAGATGTGCCCAGATGGGATTAGCTAGTAGGCGGGGTAATGGCCCACCTAGGCGACGATCTCTAGCTGGTCTGAGAGGATGACCAGCCACACTGGAACTGAGACACGGTCCAG	0	0	0	0	0	0	0	0	0	0	0	0	0	0	0	0	0	0	0	0	0	0	0	0	0	0	0	0	0	0	0	0	0	0	0	0	0	0	0	0	19	0	0	0	0	0	0	0
689	GATGAACGCTGGCGGCGTGCCTAATACATGCAAGTAGAACGCTGAAGCTTGGTGCTTGCACCGAGCGGATGAGTTGCGAACGGGTGAGTAACGCGTAGGTAACCTGCCTGGTAGCGGGGGATAACTATTGGAAACGATAGCTAATACCGCATAACAGTCGACATTGCATGATGTTGATTTGAAAGGGGCAATTGCTCCACTACCAGATGGACCTGCGTTGTATTAGCTAGTTGGTGAGGTAACGGCTCACCAAGGCGACGATACATAGCCGACCTGAGAGGGTGATCGGCCACACTGGGACTGAGACACGGCCCAG	0	0	0	0	0	0	0	0	0	0	0	0	0	0	0	0	0	0	0	0	0	0	0	0	0	0	0	0	0	0	0	0	0	0	0	0	0	0	0	0	0	0	0	0	0	0	0	0
690	ATTGAACGCTGGCGGCAGGCTTAACACATGCAAGTCGAACGGTAACAGGGATTAGCTTGCTAATTTGCTGACGAGTGGCGGACGGGTGAGTAATGCTTGGGAATCTGGCTTATGGAGGGGGATAACTACGGGAAACTGTAGCTAATACCGCGTAAAATCTTCGGATTAAAGGGTGGGACTTTCGAGCCACCTGCCATAAGATGAGCCCAAGTGGGATTAGGTAGTTGGTTAGGTAAAGGCTGACCAAGCCGACGATCTCTAGCTGGTCTGAGAGGATGACCAGCCACACTGGAACTGAGACACGGTCCAG	0	0	0	0	0	0	0	0	0	0	0	0	0	0	0	0	0	0	0	50	0	0	0	0	0	27	0	0	0	0	0	0	0	0	0	0	0	0	0	0	0	0	0	0	0	0	0	0
691	GATGAACGCTGGCGGCGTGCCTAACACATGCAAGTCGAGCGATTTACTTCGGTAAAGAGCGGCGGACGGGTGAGTAACGCGTGGGTAACCTGCCCTGTACACATGGATAACATACCGAAAGGTATGCTAATACGAGATAATATACTTTTATCGCATGGTAGAAGTATCAAAGCTCCGGCGGTACAGGATGGACCCGCGTCTGATTAGCTAGTTGGTAAGGTAACGGCTTACCAAGGCGACGATCAGTAGCCGACCTGAGAGGGTGATCGGCCACATTGGAACTGAGACACGGTCCAA	0	0	0	0	0	0	0	0	0	0	0	0	0	0	0	0	0	0	0	0	0	0	0	0	0	0	0	0	0	0	0	0	0	0	0	0	0	0	0	0	0	0	0	0	0	0	0	0
692	GATGAACGCTGGCGGCGTGCCTAATACATGCAAGTAGAACGCTGAAGCTTGGTGCTTGCACCGAGCGGAGGAGTTGCGAACGGGTGAGTAACGCGTAGGTAACCTGCCTCTTAGCGGGGGATAACTATTGGAAACGATAGCTAATACCGCATAAAAGTCGACATTGCATGATGTTGACTTGAAAGGTGCAACTGCATCACTAAGAGATGGACCTGCGTTGTATTAGCTAGTTGGTGAGGTAACGGCTCACCAAGGCGACGATACATAGCCGACCTGAGAGGGTGATCGGCCACACTGGGACTGAGACACGGCCCAG	0	0	0	0	0	0	0	0	0	0	0	0	0	0	0	0	0	0	0	0	0	0	0	0	0	0	0	0	0	0	0	0	0	0	0	0	0	0	0	0	0	0	0	0	0	0	0	0
693	ATTGAACGCTGGCGGCATGCCTTACACATGCAAGTCGAACGGCAGCACGGACTTCGGTCTGGTGGCGAGTGGCGAACGGGTGAGTAATACATCGGAACGTGCCCTGTCGTGGGGGATAACTAGTCGAAAGATTAGCTAATACCGCATACGACCTGAGGGTGAAAGCGGGGGACCGCAAGGCCTCGCGCGATAGGAGCGGCCGATGTCTGATTAGCTAGTTGGTGGGGTAAAGGCCCACCAAGGCGACGATCAGTAGCTGGTCTGAGAGGACGATCAGCCACACTGGGACTGAGACACGGCCCAG	0	0	0	0	0	0	0	0	0	0	0	0	0	0	0	0	0	0	0	0	0	0	0	0	0	0	0	0	0	0	0	0	0	0	0	0	0	0	0	0	0	0	0	0	0	0	0	0
694	GATGAACGCTAGCTATAGGCTTAACACATGCAAGTCGAGGGGAAACGGCAGAGAGTGCTTGCACACTTTGGACGTCGACCGGCGCACGGGTGAGTAACGCGTATCCAACCTGCCCTTTACTTGGGGATAACCCGTTGAAAGACGGACTAATACCCAATGATATTCATTGATGACATCTGATTTGAATTAAAGATTTATCGGTATAGGATGGGGATGCGTCTGATTAGCTTGTTGGTGAGGTAACGGCTCACCAAGGCCACGATCAGTAGGGGTTCTGAGAGGAAGGTCCCCCACATTGGAACTGAGACACGGTCCAA	0	0	0	0	0	0	0	0	0	0	0	0	0	0	0	0	0	0	0	0	0	0	0	0	0	0	0	0	0	0	0	0	0	0	0	0	0	0	0	0	0	0	115	0	0	0	0	0
695	GACGAACGCTGGCGGCGCGCTTAACACATGCAAGTCGAGCGATGAAACTTTAACAGAACCCTTCGGGGCGAAGATAAAGTGGATTAGCGGCGGACGGGTGAGTAACACGTGAGTAACCTGCCTTAGACATTGGGATAGCCTCGGGAAACCGGGATTAATACCAAATAAAATTATAATGACACATGTCATAACGATCAAAACTCCGGTGGTCTAAGATGGACTCGCGTCCCATTAGCTAGTTGGTAGAGTAAAAGCCTACCAAGGCGACGATGGGTAGCCGGCCTGAGAGGGTGAACGGCCACATTGGAACTGAGAAACGGTCCAA	0	0	0	0	0	0	0	0	0	0	0	0	0	0	661	0	0	0	0	0	0	0	0	0	0	0	0	0	0	0	0	0	0	0	0	0	0	0	0	0	0	0	0	0	0	0	0	0
696	GATGAACGCTGGCGGCGTGCCTAATACATGCAAGTCGAGCGAACAGATAAGGAGCTTGCTCCTTTGACGTTAGCGGCGGACGGGTGAGTAACACGTGGGTAACCTACCTATAAGACTGGGATAACTTCGGGAAACCGGAGCTAATACCGGATAATATTTCGAACCGCATGGTTCGATAGTGAAAGATGGTTTTGCTATCACTTATAGATGGACCCGCGCCGTATTAGCTAGTTGGTAAGGTAACGGCTTACCAAGGCAACGATACGTAGCCGACCTGAGAGGGTGATCGGCCACACTGGAACTGAGACACGGTCCAG	0	0	0	0	0	0	0	0	0	0	0	0	0	0	0	0	0	0	0	0	0	0	0	0	0	0	0	0	0	0	0	0	0	0	0	0	0	0	0	0	0	0	0	0	0	0	0	0
697	AGTGAACGCTGGCGGCGTGCCTAATACATGCAAGTCGAACGATGAAGCTTCTAGCTTGCTAGAATGCTGATTAGTGGCGCACGGGTGAGTAACGCATAGGTTATGTGCCTCTTAGTTTGGGATAGCCATTGGAAACGATGATTAATACCAGATACTCCCTACGGGGGAAAGATTTATCGCTAAGAGATCAGCCTATGTCCCATCAGCTTGTTGGTAAGGTAATGGCTTACCAAGGCTATGACGGGTATCCGGCCTGAGAGGGTGAACGGACACACTGGAACTGAGACACGGTCCAG	0	0	0	0	0	0	0	0	0	0	0	0	0	0	0	0	0	0	0	201	0	0	0	0	0	99	0	0	0	0	0	0	0	0	0	0	0	0	0	0	0	0	0	0	0	0	0	0
698	GACGAACGCTGGCGGCGTGCCTAATACATGCAAGTGGAGCGATGAAGATTGGTGCTTGCACCAATTTGAAGAGCAGCGAACGGGTGAGTAACGCGTGGGGAATCTGCCTTTGAGCGGGGGACAACATTTGGAAACGAATGCTAATACCGCATAATAACTTTAAACATAAGTTTTAAGTTTGAAAGATGCAATTGCATCACTCAAAGATGATCCCGCGTTGTATTAGCTAGTTGGTGAGGTAAAGGCTCACCAAGGCGATGATACATAGCCGACCTGAGAGGGTGATCGGCCACATTGGGACTGAGACACGGCCCAA	0	0	0	0	0	0	0	0	0	0	0	0	0	0	0	0	0	0	0	0	0	0	0	0	0	0	0	0	0	0	0	0	0	0	0	0	0	0	0	0	0	0	0	0	0	0	0	0
699	GATGAACGCTAGCTACAGGCTTAACACATGCAAGTCGAGGGGCAGCATCATCAAAGCTTGCTTTGATGGATGGCGACCGGCGCACGGGTGAGTAACACGTATCCAACCTGCCGACAACACTGGGATAGCCTTTCGAAAGAAAGATTAATACCGGATGGCATAGTTTTCCCGCATGGGATAATTATTAAAGAATTTCGGTTGTCGATGGGGATGCGTTCCATTAGGCAGTTGGCGGGGTAACGGCCCACCAAACCAACGATGGATAGGGGTTCTGAGAGGAAGGTCCCCCACATTGGAACTGAGACACGGTCCAA	0	0	0	0	0	0	0	0	0	0	0	0	0	0	0	0	0	0	0	0	0	0	0	0	0	19	0	0	0	0	0	155	0	0	0	0	0	0	0	0	0	0	0	0	0	0	0	0
700	GATGAACGCTGGCGGCGTGCCTAATACATGCAAGTCGAGCGAACAGATGAGGAGCTTGCTCCTTTGACGTTAGCGGCGGACGGGTGAGTAACACGTGGGTAACCTACCTATAAGACTGGGACAACTTCGGGAAACCGGAGCTAATACCGGATAATATGTTGAACCGCATGGTTCAATAGTGAAAGATGGTTTTGCTATCACTTATAGATGGACCCGCGCCGTATTAGCTAGTTGGTGAGGTAACGGCTCACCAAGGCAACGATACGTAGCCGACCTGAGAGGGTGATCGGCCACACTGGAACTGAGACACGGTCCAG	0	0	0	0	0	0	0	0	0	0	0	0	0	0	0	0	0	0	0	0	0	0	0	0	0	0	0	0	0	0	0	0	0	0	0	0	0	0	0	0	0	0	0	0	0	0	0	0
701	GATGAACGCTAGCTACAGGCTTAACACATGCAAGTCGAGGGGCAGCATGAACTTAGCTTGCTAAGTTTGATGGCGACCGGCGCACGGGTGAGTAACGCGTATCCAACCTGCCCTTTACTCGGGGATAGCCTTCTGAAAGGAAGTTTAATACCCGATGAATTCGTTTAGTCGCATGGCTTGATGAAGAAAGATTTATCAGTAAAGGATGGGGATGCGTCCCATTAGCTTGTTGGCGGGGTAACGGCCCACCAAGGCGACGATGGGTAGGGGTTCTGAGAGGAAGGTCCCCCACATTGGAACTGAGACACGGTCCAA	0	0	0	0	0	0	0	0	0	0	0	0	0	0	0	0	0	0	0	0	0	0	0	0	0	0	0	658	0	0	0	0	0	0	0	0	0	0	0	0	0	0	0	0	0	0	0	0
702	GATGAACGCCGGCGGTGTGCCTAATACATGCAAGTCGAACGCGTTGGCCCAATTGATTGACGGTGCTTGCACCTGATTGATTTTGGTCGCCAACGAGTGGCGGACGGGTGAGTAACACGTAGGTAACCTGCCCAGAAGCGGGGGACAACATTTGGAAACAGATGCTAATACCGCATAACAGCGTTGTTCGCATGAACAACACTTAAAAGATGGCTTCTCGCTATCACTTCTGGATGGACCTGCGGTGCATTAGCTTGTTGGTGGGGTAACGGCCTACCAAGGCGATGATGCATAGCCGAGTTGAGAGACTGATCGGCCACAATGGGACTGAGACACGGCCCAT	0	0	0	0	0	0	0	0	0	0	0	0	0	0	0	0	0	0	0	0	0	0	0	0	0	0	0	0	0	0	0	0	0	0	0	0	0	0	0	0	0	0	0	0	0	0	0	0
703	AACGAACGTTAGCGGCGCGCCTAACACATGCAAGTCGCACGAGAAAGGGCTTCGGCCCCGGTAAAGTGGCGCACGGGTGAGTAACACGTGGGTAATGTTCCCTCGGGCGGGGGATAACCTTCCGAAAGGAGGGCTAATACCGCATAAGACCACGGCCTTGAAAGAGGCTGAGGTAAAAGCAGGCCTCTGCATGCAAGCTTGCACCTGAGGATCAGCCCGCGGCCCATCAGCTAGTTGGCAGGGTAATGGCCTACCAAGGCTAAGACGGGTAGCTGGTCTGAGAGGATGATCAGCCACACTGGAACTGAGACACGGTCCAG	0	0	0	0	0	0	0	0	0	0	0	0	0	0	0	0	0	0	0	0	0	0	0	0	0	0	0	0	0	0	0	0	0	0	0	0	0	0	0	0	0	0	0	0	0	0	0	0
704	ATTGAACGCTGGCGGCAGGCCTAACACATGCAAGTCGAGCGGTAGAGAGAAGCTTGCTTCTCTTGAGAGCGGCGGACGGGTGAGTAATGCCTAGGAATCTGCCTGGTAGTGGGGGATAACGTCCGGAAACGGACGCTAATACCGCATACGTCCTACGGGAGAAAGCAGGGGACCTTCGGGCCTTGAGCTATCAGATGAGCCTAGGTCGGATTAGCTAGTTGGTGGGGTAATGGCTCACCAAGGCGACGATCCGTAACTGGTCTGAGAGGATGATCAGTCACACTGGAACTGAGACACGGTCCAG	0	0	0	0	0	0	0	0	0	0	0	0	0	0	0	0	0	0	0	0	0	0	0	0	0	0	0	0	0	0	0	0	0	0	0	0	0	0	0	0	0	0	0	0	0	0	0	0
705	ATTGAACGCTGGCGGCATGCCTTACACATGCAAGTCGAACGGCAGCGCGGGCTTCGGCCTGGCGGCGAGTGGCGAACGGGTGAGTAATACATCGGAACGTGCCCTGTTGTGGGGGATAACTAGTCGAAAGATTAGCTAATACCGCATACGACCTGAGGGTGAAAGCGGGGGACCGTAAGGCCTCGCGCAGCAGGAGCGGCCGATGTCTGATTAGCTAGTTGGTGGGGTAATGGCCTACCAAGGCGACGATCAGTAGCTGGTCTGAGAGGACGATCAGCCACACTGGGACTGAGACACGGCCCAG	0	0	0	0	0	0	0	0	0	0	0	0	0	0	0	0	0	0	0	0	0	0	0	0	0	0	0	0	0	0	0	0	0	0	0	0	0	0	0	0	0	0	0	0	0	0	0	0
706	GACGAACGCTGGCGGCATGCCTAATACATGCAAGTCGAACGCTTTTGTTTCACCGGGTGCTTGCACCCATCGAAACAAAAGAGTGGCGGACGGGTGAGTAACACGTGGGTAACCTGCCCATAAGAGGGGGATAACATCCGGAAACGGATGCTAATACCGCATATTTCCAATTGTCTCCTGACAGATGGAAAAAAGGTGGCTTCGGCTACCGCTTATGGATGGACCCGCGGCGTATTAGCTAGTTGGTGAGGTAATGGCTCACCAAGGCGATGATACGTAGCCGACCTGAGAGGGTGATCGGCCACACTGGGACTGAGACACGGCCCAG	0	0	0	0	0	0	0	0	0	0	0	0	0	0	0	0	0	0	0	0	0	0	0	0	0	0	0	651	0	0	0	0	0	0	0	0	0	0	0	0	0	0	0	0	0	0	0	0
707	GACGAACGCTGGCGGCGTGCCTAATACATGCAAGTCGAGCGGACCGAACGAGGGCTTGCTCTTGTTTGGTCAGCGGCGGACGGGTGAGTAACACGTGGGCAACCTGCCCGCAAGACCGGGATAACTCCGGGAAACCGGAGCTAATACCGGATAACACCGAAGACCGCATGGTCTTCGGTTGAAAGGCGGCCTTTGGGCTGTCACTTGCGGATGGGCCCGCGGCGCATTAGCTAGTTGGTGAGGTAACGGCTCACCAAGGCGACGATGCGTAGCCGGCCTGAGAGGGTGACCGGCCACACTGGGACTGAGACACGGCCCAG	0	0	0	0	0	0	0	0	0	0	0	0	0	0	0	0	0	0	0	0	0	0	0	0	0	0	0	0	0	0	0	0	0	0	0	0	0	0	0	0	0	0	0	0	0	0	0	0
708	GATGAACGCTGGCGGCGTGCCTAACACATGCAAGTCGAGCGAGAAGTTACTCAATGAATCTTCGGAAGAATTAAGTAATGGAAAGCGGCGGACGGGTGAGTAACGCGTGGGCAACCTGCCTTTCACAGAGGGATAGCCAAAGGAAACTTTGATTAAAACCTCATAAAGCCGGAATAGTGCATAATATACCGGCCAAAGATTTATCGGTGAAAGATGGGCCCGCGTCTGATTAGCTAGTTGGTGGGGTAACGGCTCACCAAGGCAACGATCAGTAGCCGACCTGAGAGGGTGATCGGCCACATTGGAACTGAGACACGGTCCAA	0	0	0	0	0	0	0	0	0	0	0	0	0	0	0	0	0	0	0	0	0	0	0	0	0	0	191	0	0	0	0	0	0	0	0	0	0	0	0	0	0	0	0	0	0	0	0	0
709	GACGAACGCTGGCGGCGTGCCTAATACATGCAAGTCGAGCGGATCTTGTCCTTCGGGACAAGGTTAGCGGCGGACGGGTGAGTAACACGTAGGCAACCTGCCTGTAAGACCGGGATAACCTTCGGAAACGGATGCTAATACCGGATATGCGGCTTCTCCACATGGAGAGGTCGGGAAAGACGGTGCAAGCTGTCACTTACAGATGGGCCTGCGGCGCATTAGCTAGTTGGTGAGGTAACGGCTCACCAAGGCGACGATGCGTAGCCGACCTGAGAGGGTGATCGGCCACACTGGGACTGAGACACGGCCCAG	0	0	0	0	0	0	0	0	0	0	0	0	0	0	0	0	0	0	0	0	0	0	0	0	0	0	0	0	0	0	0	0	0	0	0	0	0	0	0	0	0	0	0	0	0	0	0	0
710	ATTGAACGCTGGCGGCATGCCTTACACATGCAAGTCGAACGGTAACAGGTCTTCGGATGCTGACGAGTGGCGAACGGGTGAGTAATACATCGGAACGTGCCCGATCGTGGGGGATAACGAAGCGAAAGCTTTGCTAATACCGCATACGATCTACGGATGAAAGCAGGGGACCGCAAGGCCTTGCGCGAACGGAGCGGCCGATGGCAGATTAGGTAGTTGGTGGGATAAAAGCTTACCAAGCCGACGATCTGTAGCTGGTCTGAGAGGACGACCAGCCACACTGGGACTGAGACACGGCCCAG	0	0	0	0	0	0	0	0	0	0	0	0	0	0	0	0	0	0	0	0	0	0	0	0	0	0	0	0	3	0	215	0	0	0	0	0	0	0	0	0	0	0	0	0	0	0	0	0
711	ATTGAACGCTGGCGGCAGGCCTAACACATGCAAGTCGAGCGGATGACGGGAGCTTGCTCTCTGATTCAGCGGCGGACGGGTGAGTAATGCCTAGGAATCTGCCTGGTAGTGGGGGACAACGTTTCGAAAGGAACGCTAATACCGCATACGTCCTACGGGAGAAAGCAGGGGACCTTCGGGCCTTGCGCTATCAGATGAGCCTAGGTCGGATTAGCTAGTTGGTGGGGTAATGGCTCACCAAGGCGACGATCCGTAACTGGTCTGAGAGGATGATCAGTCACACTGGAACTGAGACACGGTCCAG	0	0	0	0	0	0	0	0	0	0	0	0	0	0	0	0	0	0	0	0	0	0	0	0	0	0	0	0	0	0	0	0	0	0	0	0	0	0	0	0	0	0	0	0	0	646	0	0
712	GATGAACGCTGGCGGCGTGCCTAATACATGCAAGTCGAGCGAATGGATTGAGAGCTTGCTCTCAAGAAGTTAGCGGCGGACGGGTGAGTAACACGTGGGTAACCTGCCCATAAGACTGGGATAACTCCGGGAAACCGGGGCTAATACCGGATAATATTTTGAACTGCATGGTTCGAAATTGAAAGGCGGCTTCGGCTGTCACTTATGGATGGACCCGCGTCGCATTAGCTAGTTGGTGAGGTAACGGCTCACCAAGGCAACGATGCGTAGCCGACCTGAGAGGGTGATCGGCCACACTGGGACTGAGACACGGCCCAG	0	0	0	0	0	0	0	0	0	0	0	0	0	0	0	0	0	0	0	0	0	0	0	0	0	0	0	0	0	0	0	0	0	0	0	0	0	0	0	0	0	0	0	0	0	0	0	0
713	GACGAACGCTGGCGGCGCGCTTAACACATGCAAGTCGAGCGATGAAATTTCGACAGATCCCTTCGGGGTGAAGATGAAATTGATTAGCGGCGGACGGGTGAGTAACACGTGAGTAACCTGCCTTAGACATTGGGATAGCCTCGGGAAACCGGGATTAATACCAAATGAAATCACATATGCACATGCATAAATGATCAAAGCTCCGGCGGTCTAAGATGGACTCGCGTCCCATTAGCTAGTTGGTGAGGTAACGGCCCACCAAGGCGACGATGGGTAGCCGGCCTGAGAGGGTGAACGGCCACATTGGAACTGAGAAACGGTCCAA	0	0	0	0	0	0	0	0	0	0	0	0	0	0	0	0	0	0	0	0	0	0	0	0	0	0	0	0	0	0	0	0	0	0	0	0	0	0	0	0	0	0	0	0	0	0	0	0
714	GATGAACGCTGGCGGCGTGCTTAACACATGCAAGTCGAACGGGATCCATCAGGCTTTGCTTGGTGGTGAGAGTGGCGAACGGGTGAGTAATGCGTGACCGACCTGCCCCATACACCGGAATAGCTCCTGGAAACGGGTGGTAATGCCGGATGCTCCGACTCCTCGCATGGGGTGTCGGGAAAGATTTCATCGGTATGGGATGGGGTCGCGTCCTATCAGGTAGTCGGCGGGGTAACGGCCCACCGAGCCTACGACGGGTAGCCGGCCTGAGAGGGCGACCGGCCACATTGGGACTGAGATACGGCCCAG	0	0	0	0	0	0	0	0	0	0	0	0	0	0	0	0	0	0	0	14	0	0	0	0	0	16	0	0	0	0	0	0	0	0	0	0	0	0	0	0	0	0	0	0	0	0	0	0
715	AGCGAACGCTGGCGGCAGGCTTAACACATGCAAGTCGAGCGGGCATAGCAATATGTCAGCGGCAGACGGGTGAGTAACGCGTGGGAACGTACCTTTTGGTTCGGAACAACACAGGGAAACTTGTGCTAATACCGGATAAGCCCTTACGGGGAAAGATTTATCGCCGAAAGATCGGCCCGCGTCTGATTAGCTAGTTGGTGAGGTAATGGCTCACCAAGGCGACGATCAGTAGCTGGTCTGAGAGGATGATCAGCCACATTGGGACTGAGACACGGCCCAA	0	0	0	0	0	0	0	0	0	0	0	0	0	349	0	0	0	0	0	0	44	0	0	0	0	0	0	0	0	0	0	0	0	56	0	0	0	0	0	0	0	0	0	0	0	0	0	0
716	GATGAACGCTGGCGGCGTGCTTAACACATGCAAGTCGAACGATGAAGCCCAGCTTGCTGGGTGGATTAGTGGCGAACGGGTGAGTAACACGTGAGTAACCTGCCCTTGACTCTGGGATAAGCCCGGGAAACTGGGTCTAATACCGGATAGGAGCGCCTGTCGCATGACGGGTGTTGGAAAGATTTTTCGGTCATGGATGGACTCGCGGCCTATCAGCTTGTTGGTGAGGTAATGGCTCACCAAGGCGACGACGGGTAGCCGGCCTGAGAGGGTGACCGGCCACACTGGGACTGAGACACGGCCCAG	0	0	0	0	0	0	0	0	0	0	0	0	0	0	0	0	0	0	0	0	0	0	0	0	0	0	0	0	0	0	0	0	0	0	0	0	0	0	0	0	13	0	0	0	0	0	0	0
717	ATTGAACGCTGGCGGCATGCCTTACACATGCAAGTCGAACGGCAGCACGGGAGCAATCCTGGTGGCGAGTGGCGAACGGGTGAGTAATATATCGGAACGTGCCCAGTAGTGGGGGATAGCCCGGCGAAAGCCGGATTAATACCGCATACGACCTGAGGGTGAAAGCGGGGGATCGCAAGACCTCGCGCTACTGGAGCGGCCGATATCAGATTAGCTAGTTGGTGGGGTAAAGGCCTACCAAGGCAACGATCTGTAGTTGGTCTGAGAGGACGACCAGCCACACTGGGACTGAGACACGGCCCAG	0	0	0	0	0	0	0	0	0	0	0	0	0	0	0	0	0	0	0	0	0	0	0	0	0	0	0	0	0	0	0	0	0	0	0	0	0	0	0	0	0	0	0	0	0	0	0	0
718	GACGAACGCTGGCGGCACGCTTAACACATGCAAGTCGAACGAGAGAAGAGAAGCTTGCTTTTCTGATCTAGTGGCGGACGGGTGAGTAACACGTGAGCAATCTGCCTTTCAGAGGGGGATACCGATTGGAAACGATCGTTAATACCGCATAATATAATTGAACCGCATGATTTGATTATCAAAGATTTATCGCTGAAAGATGAGCTCGCGTCTGATTAGCTAGTTGGTAAGGTAACGGCTTACCAAGGCGACGATCAGTAGCCGGACTGAGAGGTTGATCGGCCACATTGGGACTGAGACACGGCCCAG	0	0	0	0	0	0	0	0	0	0	0	0	0	0	0	0	0	0	0	29	0	0	0	0	0	0	0	0	0	0	0	0	0	0	0	4	0	0	0	0	0	0	0	0	0	0	0	0
719	GACGAACGCTGGCGGCGTGCCTAATACATGCAAGTAGAACGCTGAAGAGAGGAGCTTGCTCTTCTTGGATGAGTTGCGAACGGGTGAGTAACGCGTAGGTAACCTGCCTGGTAGCGGGGGATAACTATTGGAAACGATAGCTAATACCGCATGATATTAATTGTCGCATGATAATTAATTGAAAGATGCAATTGCATCACTACCAGATGGACCTGCGTTGTATTAGCTAGTTGGTGAGGTAACGGCTCACCAAGGCGACGATACATAGCCGACCTGAGAGGGTGATCGGCCACACTGGGACTGAGACACGGCCCAG	0	0	0	0	0	0	0	0	0	0	0	0	0	0	0	633	0	0	0	0	0	0	0	0	0	0	0	0	0	0	0	0	0	0	0	0	0	0	0	0	0	0	0	0	0	0	0	0
720	GATGAACGCTAGCTACAGGCTTAACACATGCAAGTCGAGGGGCAGCATCATCAAAGCTTGCTTTGATGGATGGCGACCGGCGCACGGGTGAGTAACACGTATCCAACCTGCCGACAACACTGGGATAGCCTTTCGAAAGAAAGATTAATACCGGATGGTATAGTTTTCCCGCATGGGATGATTATTAAAGAATTTCGGTTGTCGATGGGGATGCGTTCCATTAGGCAGTTGGCGGGGTAACGGCCCACCAAACCTACGATGGATAGGGGTTCTGAGAGGAAGGTCCCCCACATTGGAACTGAGACACGGTCCAA	0	0	0	0	0	0	0	0	0	0	0	0	0	0	0	0	0	0	0	0	0	0	22	0	0	0	0	0	0	0	0	0	0	0	0	0	0	0	0	0	0	0	0	0	0	0	0	0
721	ATTGAACGCTGGCGGCAGGCTTAACACATGCAAGTCGAGCGGGCGAGGTTGCTTCGGTAACTGAGCTAGCGGCGGACGGGTGAGTAAAGCTTAGGAATCTGCCTATTAGTGGGGGACAACATTTCGAAAGGGATGCTAATACCGCATACGTCCTACGGGAGAAAGCAGGGGATCACTTGTGACCTTGCGCTAATAGATGAGCCTAAGTCGGATTAGCTAGTTGGTGGGGTAAAGGCCTACCAAGGCGACGATCTGTAGCGGGTCTGAGAGGATGATCCGCCACACTGGGACTGAGACACGGCCCAG	0	0	0	0	0	0	0	0	0	0	0	0	0	0	0	0	0	0	0	0	0	0	0	0	0	0	0	0	0	0	0	0	0	0	0	0	0	0	0	0	0	0	0	0	0	0	0	0
722	GACGAACGCTGGCGGCGTGCTTAACACATGCAAGTCGAACGATGAAACCTAGCAATCTTTGGTTGTTGGGTGGATTAGTGGCGAACGGGTGAGTAATACGTGGGTAACCTGCCCTCCTTTTTGGGATAAGCCTTGGAAACGGGGTCTAATACCGAATATTCTGGATGATTCGCATGGATTGTTTGGGAAAGCTTTTGTGAAGGGGGATGGGCTCGCGGCCTATCAGCTTGTTGGTGGGGTGATGGCCTACCAAGGCGGTGACGGGTAGCCGGCCTGAGAGGGTGACCGGCCACATTGGGACTGAGATACGGCCCAG	0	0	0	0	0	0	0	0	0	0	0	0	0	0	0	0	0	0	85	0	0	0	0	0	0	0	0	0	399	0	0	0	0	0	0	0	0	29	0	0	0	0	0	0	0	0	0	0
723	GACGAACGCTGGCGGCGTGCTTAACACATGCAAGTCGAACGGAAAGGCCTTTTCGGAGGTACTCGAGTGGCGAACGGGTGAGTAACACGTGGGTGATCTGCCCTGCACTCTGGGATAAGCCTGGGAAACTGGGTCTAATACCGGATAGGACCGCACTTTAGTGTGTGTGGTGGAAAGTTTTTTCGGTGTAGGATGAGCCCGCGGCCTATCAGCTTGTTGGTGGGGTAATGGCCTACCAAGGCGGCGACGGGTAGCCGGACTGAGAGGTTGGTCGGCCACATTGGGACTGAGATACGGCCCAG	0	0	0	0	0	0	0	0	0	0	0	0	0	0	0	0	0	0	0	0	0	0	0	0	0	0	0	0	0	0	0	0	0	0	0	0	0	0	0	0	0	0	0	0	0	0	0	0
724	GATGAACGCTAGCTATAGGCTTAACACATGCAAGTCGAGGGGCAGCGAATAGATAGCTTGCTATTTATGTCGGCGACCGGCGCACGGGTGAGTAACGCGTATCCAACCTGCCCATAACTAAGGGATAACCCAGCGAAAGTTGGACTAATACCTTATGTATTCGTTTGATCTCATGAGATTACGAATAAAGATTTATCGGTTATGGATGGGGATGCGTCTGATTAGCTTGTTGGCGGGGTAACGGCCCACCAAGGCAACGATCAGTAGGGGTTCTGAGAGGAAGGCCCCCCACATTGGAACTGAGACACGGTCCAA	0	0	0	0	0	0	0	0	0	0	0	0	0	0	0	0	0	0	0	0	0	0	0	0	0	0	0	0	0	0	0	0	0	0	0	0	0	0	0	0	0	0	0	0	0	0	0	0
725	GATGAACGCCGGCGGTGTGCCTAATACATGCAAGTCGAGCGCACTGGCCCAACTGATATGACGTGCTTGCACTGAATTGACGTTGGATTCCCAGTGAGCGGCGGACGGGTGAGTAACACGTGGGCAACCTTCCCTGAAGCGGGGGACAACATCTGGAAACAGGTGCTAATACCGCATAACAACGAAATCCACATGGTTTTCGTTTCAAAGATGGTTTCGGCTATCACTTCAGGATGGGCCCGCGGTGCATTAGCTAGTTGGTAAGGTAACGGCTTACCAAGGCGATGATGCATAGCCGAGTTGAGAGACTGATCGGCCACAATGGAACTGAGACACGGTCCAT	0	0	0	0	0	0	0	0	0	0	0	0	0	0	0	0	0	0	0	0	0	0	0	0	0	0	0	0	0	0	0	0	0	0	0	0	0	0	0	0	0	0	0	0	0	0	0	0
726	GATGAACGCTGGCGGCGTGCTTAACACATGCAAGTCGAACGGGAAATATTTCATTGAGACTTCGGTGGATTTGATCTATTTCTAGTGGCGGACGGGTGAGTAACGCGTGGGTAACCTGCCTTATACAGGGGGATAACAGTCAGAAATGGCTGCTAATACCGCATAAGCGCACAGAGCTGCATGGCTCAGTGTGAAAAACTCCGGTGGTATAAGATGGACCCGCGTTGGATTAGCTAGTTGGTGGGGTAACGGCCCACCAAGGCGACGATCCATAGCCGGCCTGAGAGGGTGAACGGCCACATTGGGACTGAGACACGGCCCAG	0	0	0	0	0	0	0	0	0	0	0	0	0	0	0	0	0	0	0	0	0	0	0	0	0	0	91	0	0	0	0	0	0	0	0	0	0	0	0	0	0	0	0	0	0	0	0	0
727	ATTGAACGCTGGCGGCATGCTTTACACATGCAAGTCGGACGGCAGCGGGGTAGTGCTTGCACTACTGCCGGCGAGTGGCGAACGGGTGAGTAACATATCGGAACGTACCGAGCAGTGGGGGATAACTAATCGAAAGATTAGCTAATACCGCATATATTCTGAGGAAGAAAGCAGGGGACCTTTGGGCCTTGCGCTGTTTGAGCGGCCGATATCTGATTAGCTGGTTGGTGGGGTAAAGGCCTACCAAGGCGACGATCAGTAGCGGGTCTGAGAGGATGATCCGCCACACTGGGACTGAGACACGGCCCAG	0	0	0	0	0	0	0	0	0	0	0	0	0	0	0	0	0	0	0	0	0	0	0	0	0	18	0	0	0	0	0	0	0	0	0	0	0	0	0	0	0	0	0	0	0	0	0	0
728	ATTGAACGCTGGCGGCAGGCTTAACACATGCAAGTCGAACGGTAACAGGAATTAGCTTGCTAATTTGCTGACGAGTGGCGGACGGGTGAGTAATGCTTGGGAATCTGGCTTATGGAGGGGGATAACTACGGGAAACTGTAGCTAATACCGCGTAAAATCTTCGGATTAAAGGGTGGGACTTTCGAGCCACCTGCCATAAGATGAGCCCAAGTGGGATTAGGTAGTTGGTTAGGTAAAGGCTGACCAAGCCGACGATCTCTAGCTGGTCTGAGAGGATGACCAGCCACACTGGAACTGAGACACGGTCCAG	0	0	0	0	0	0	0	0	0	0	0	0	0	0	0	0	0	0	0	25	0	0	0	0	0	0	0	0	0	0	0	0	0	0	0	0	0	0	0	0	0	0	0	0	0	0	0	0
729	ATTGAACGCTGGCGGCAGGCCTAACACATGCAAGTCGAACGGTAGCACAGAGGAGCTTGCTCCTTGGGTGACGAGTGGCGGACGGGTGAGTAATGTCTGGGAAACTGCCCGATGGAGGGGGATAACTACTGGAAACGGTAGCTAATACCGCATAACGTCGCAAGACCAAAGAGGGGGACCTTCGGGCCTCTTGCCATCGGATGTGCCCAGATGGGATTAGCTAGTAGGTGGGGTAACGGCTCACCTAGGCGACGATCCCTAGCTGGTCTGAGAGGATGACCAGCCACACTGGAACTGAGACACGGTCCAG	0	0	0	0	0	0	0	0	0	0	0	0	0	0	0	0	0	0	0	0	0	0	0	0	0	99	0	0	0	0	0	0	0	0	0	0	0	0	0	0	0	0	0	0	0	0	0	0
730	GACGAACGCTGGCGGCGCGCTTAACACATGCAAGTCGAGCGATGAAATTTTGACAGATCCCTTCGGGGTGAAGATAAAATGGATTAGCGGCGGACGGGTGAGTAACACGTGAGTAACCTGCCTTAGACATTGGGATAGCCTCGGGAAACCGGGATTAATACCGAATAAAATCATAGGTGCACATGCACTAATGATCAAAACTCCGGTGGTCTAAGATGGACTCGCGTCCCATTAGCTAGTTGGTGAGGTAACGGCCCACCAAGGCGACGATGGGTAGCCGGCCTGAGAGGGTGAACGGCCACATTGGAACTGAGAAACGGTCCAA	0	0	0	0	0	0	0	0	0	0	0	0	0	0	0	0	0	0	0	0	0	0	0	0	0	0	0	0	0	0	0	0	0	0	0	0	0	0	0	0	0	0	0	0	0	0	0	0
731	GACGAACGCTGGCGGCGCGCTTAACACATGCAAGTCGAGCGATGAAATCTTGACAGAACCCTTCGGGGTGAAGATAAGATGGATTAGCGGCGGACGGGTGAGTAACACGTGAGTAACCTGCCTTAGACATTGGGATAGCCTCGGGAAACCGGGATTAATACCAAATGAAATCACATATGCACATGCATAAATGATCAAAGCTCCGGCGGTCTAAGATGGACTCGCGTCCCATTAGCTGGTTGGTGAGGTAACGGCCCACCAAGGCGACGATGGGTAGCCGGCCTGAGAGGGTGAACGGCCACATTGGAACTGAGAAACGGTCCAA	0	0	0	0	0	0	0	0	0	0	0	0	0	0	0	0	0	0	0	0	0	0	0	0	0	0	0	0	0	0	0	0	0	0	0	0	0	0	0	0	0	0	0	0	0	0	0	0
732	ATTGAACGCTGGCGGCAGGCCTAACACATGCAAGTCGAACGGTAACAGGAAACAGCTTGCTGTTTCGCTGACGAGTGGCGGACGGGTGAGTAATGTCTGGGAAACTGCCTGATGGAGGGGGATAACTGCTGGAAACGGTAGCTAATACCGCATAATGTCGCAAGACCAAAGAGGGGGACCTTCGGGCCTCTTGCCATCGGATGTGCCCAGATGGGATTAGCTAGTAGGTGGGGTAACGGCTCACCTAGGCGACGATCCCTAGCTGGTCTGAGAGGATGACCAGCCACACTGGAACTGAGACACGGTCCAG	0	0	0	0	0	0	0	0	0	0	0	0	0	0	0	0	0	0	0	0	0	0	0	0	0	0	0	0	0	0	0	0	0	0	0	0	0	0	0	0	0	0	0	0	0	0	0	0
733	GACGAACGCTGGCGGCGTGCTTAACACATGCAAGTCGAACGGAAAGGCTCCTGCTTGCAGGGGTACTCGAGTGGCGAACGGGTGAGTAACACGTGGGTGATCTGCCTTGCACTCTGGGATAAGCTTGGGAAACTGGGTCTAATACCGGATAGGAACCGTCTTTAGTGTGGTGGTTGGAAAGTTTTTTCGGTGCAAGATGAGCTCGCGGCCTATCAGCTTGTTGGTGGGGTAATGGCCTACCAAGGCGTCGACGGGTAGCCGGCCTGAGAGGGTGTACGGCCACATTGGGACTGAGATACGGCCCAG	0	0	0	0	0	0	0	0	0	0	0	0	0	0	0	0	0	0	0	0	0	0	0	0	0	0	0	0	0	0	0	0	0	0	0	0	0	0	0	0	0	0	0	0	0	0	0	0
734	ATTGAACGCTGGCGGCAGGCCTAACACATGCAAGTCGAGCGGATGAAGGGAGCTTGCTCCTGGATTCAGCGGCGGACGGGTGAGTAATGCCTAGGAATCTGCCTGGTAGTGGGGGATAACGTCCGGAAACGGGCGCTAATACCGCATACGTCCTGAGGGAGAAAGTGGGGGATCTTCGGACCTCACGCTATCAGATGAGCCTAGGTCGGATTAGCTAGTTGGTGGGGTAAAGGCCTACCAAGGCGACGATCCGTAACTGGTCTGAGAGGATGATCAGTCACACTGGAACTGAGACACGGTCCAG	0	0	0	0	0	0	0	0	0	0	0	0	0	0	0	0	0	0	0	0	0	0	0	0	0	0	0	0	0	0	0	0	0	0	0	0	0	0	0	0	0	0	0	0	0	0	0	0
735	AGCGAACGCTGGCGGCAGGCCTAACACATGCAAGTCGAACGAACCTTTCGGGGTTAGTGGCGGACGGGTGAGTAACACGTGGGAACGTGCCTTTAGGTTCGGAATAACTCAGGGAAACTTGTGCTAATACCGAATGTGCCCTTCGGGGGAAAGATTTATCGCCTTTAGAGCGGCCCGCGTCTGATTAGCTAGTTGGTGAGGTAATGGCTCACCAAGGCGACGATCAGTAGCTGGTCTGAGAGGATGATCAGCCACATTGGGACTGAGACACGGCCCAA	0	0	0	0	0	0	0	0	0	0	0	0	0	0	0	0	0	0	0	0	0	0	0	0	0	0	0	0	0	0	0	0	0	0	0	0	0	0	0	0	0	0	0	0	0	0	0	0
736	GATGAACGCTAGCTACAGGCTTAACACATGCAAGTCGCAGGGTAACATGAGGAAAGCTTGCTTTCCTTGATGACGACTGGCGCACGGGTGAGTAACGCGTATCCAACCTTCCCATAACTACGGGATAACCCGTTGAAAGACGGCCTAATACCGTATGACATCGTTTGCTGACATCAAATAACGATTAAAGGTTTAGCGGTTATGGATGGGGATGCGTCTGATTAGCTTGTTGGCGGGGTAACGGCCCACCAAGGCAACGATCAGTAGGGGTTCTGAGAGGAAGGTCCCCCACATTGGAACTGAGACACGGTCCAA	0	0	0	0	0	0	0	0	0	0	0	0	0	0	0	0	0	0	0	0	0	0	0	0	0	0	0	0	0	0	0	0	0	0	0	0	0	0	0	0	0	0	0	0	0	0	0	0
737	ATTGAACGCTGGCGGCATGCTTTACACATGCAAGTCGGACGGCAGCACAGAGAAGCTTGCTTCTTGGGTGGCGAGTGGCGAACGGGTGAGTAACGCATCGGAACGTACCGAGTAGTGGGGGATAACTGTCCGAAAGGATGGCTAATACCGCATACGCTTTGAGAAGGAAAGCGGGGGATCTTCGGACCTCGCGCTATTCGAGCGGCCGATGTCTGATTAGCTAGTTGGTGGGGTAAAGGCCTACCAAGGCGACGATCAGTAGCGGGTCTGAGAGGATGATCCGCCACACTGGGACTGAGACACGGCCCAG	0	0	0	0	0	0	0	0	0	0	0	0	0	0	0	0	0	0	0	0	0	0	0	0	0	0	0	0	0	0	0	617	0	0	0	0	0	0	0	0	0	0	0	0	0	0	0	0
738	GATGAACGCTGGCGGCGCGCCTAACACATGCAAGTCGAACGGCACCCACCTTCGGGTGGAAGCGAGTGGCGAACGGCTGAGTAACACGTGGAGAACCTGCCCCCTCCCCCGGGATAGCCGCCCGAAAGGACGGGTAATACCGGATACCCCGGGGTGCCGCATGGCACCCCGGCTAAAGCCCCGACGGGAGGGGATGGCTCCGCGGCCCATCAGGTAGACGGCGGGGTGACGGCCCACCGTGCCGACAACGGGTAGCCGGGTTGAGAGACCGACCGGCCAGATTGGGACTGAGACACGGCCCAG	0	0	0	0	0	0	0	0	0	0	0	0	0	0	0	0	0	0	0	0	0	0	0	0	0	17	0	0	0	0	0	0	0	0	0	0	0	0	0	0	0	0	0	0	0	0	0	0
739	AGTGAACGCTGGCGGTAGGCCTAACACATGCAAGTCGAACGGCAGCACAGGGGAGCTTGCTCCCTGGGTGGCGAGTGGCGGACGGGTGAGGAATACATCGGAATCTACTCTGTCGTGGGGGATAACGTAGGGAAACTTACGCTAATACCGCATACGACCTACGGGTGAAAGTGGGGGACCGCAAGGCCTCACGCGATTGAATGAGCCGATGTCGGATTAGCTAGTTGGCGGGGTAAAGGCCCACCAAGGCGACGATCCGTAGCTGGTCTGAGAGGATGATCAGCCACACTGGAACTGAGACACGGTCCAG	0	0	0	0	0	0	0	0	0	0	0	0	0	0	0	0	0	0	0	0	0	0	0	0	0	0	0	0	0	0	0	0	0	0	0	0	0	0	0	0	0	0	0	0	0	0	0	0
740	GATGAACGCTAGCGACAGGCTTAACACATGCAAGTCGAGGGGCAGCGGGGAGTAGCAATACTTCGCCGGCGACCGGCGCACGGGTGAGTAACACGTGTGCAACCAACCCCGTACCGGGAGATAACCCGCGGAAACGTGGACTAACATCCCATAAGACTCTAGAGCCGCATGGCTCTGGATTTAAAATTCCGGTGGTACGGGACGGGCACGCGCGACATTAGGTAGTTGGCGGGGTAACGGCCCACCAAGCCGACGATGTCTAGGGGTTCTGAGAGGAAGGTCCCCCACACTGGAACTGAGACACGGTCCAG	0	0	0	0	0	0	0	0	0	0	0	0	0	0	0	617	0	0	0	0	0	0	0	0	0	0	0	0	0	0	0	0	0	0	0	0	0	0	0	0	0	0	0	0	0	0	0	0
741	GATGAACGCTAGCTACAGGCTTAACACATGCAAGTCGAGGGGCAGCGGGTTGAAAGCTTGCTTTCAATGCCGGCGACCGGCGCACGGGTGCGTAACGCGTATCAAACCTGCCTCATACTCGGGGATAGCCTTGCGAAAGTAAGATTAATACCCGATGTTGTTGCTTTCTCGCATGGGAGAGTAACCAAAGATTTATCGGTATGAGATGGTGATGCGTCCGATTAGGTAGTAGGCGGGGTAACGGCCCACCTAGCCTTCGATCGGTAGGGGTTCTGAGAGGAAGGTCCCCCACACTGGAACTGAGACACGGTCCAG	0	0	0	0	0	0	0	0	0	0	0	0	0	0	0	0	0	0	0	57	0	0	0	0	0	7	0	0	0	0	0	0	0	0	0	0	0	0	0	0	0	0	0	0	0	0	0	0
742	GACGAACGCTGGCGGCGTGCCTAATACATGCAAGTAGAACGCTGAAGAGAGGAGCTTGCTCTTCTTGGATGAGTTGCGAACGGGTGAGTAACGCGTAGGTAACCTGCCTGGTAGCGGGGGATAACTATTGGAAACGATAGCTAATACCGCATAAAATTGATTATTGCATGATAATTGATTGAAAGATGCAATTGCATCACTACCAGATGGACCTGCGTTGTATTAGCTAGTTGGTGAGGTAACGGCTCACCAAGGCGACGATACATAGCCGACCTGAGAGGGTGATCGGCCACACTGGGACTGAGACACGGCCCAG	0	0	0	0	0	0	0	0	0	0	0	0	0	0	0	0	0	0	0	0	0	0	0	0	0	0	0	0	0	0	0	0	0	0	0	0	0	0	0	0	0	0	0	0	0	0	0	0
743	GACGAACGCTGGCGGCGTGCCTAATACATGCAAGTCGAGCGAAGTTTTTCTGGTGCTTGCACCGGAAAAACTTAGCGGCGAACGGGTGAGTAACACGTAAAGAACCTACCTCATAGACTGGGACAACTATTGGAAACGATAGCTAATACCGGATAACAGCATTAACTGCATGGTTGATGTTTAAAAGTTGGTTTTGCTAACACTATGAGATGGCTTTGCGGTGCATTAGCTAGTTGGTGGGGTAAAGGCCTACCAAGGCGACGATGCATAGCCGACCTGAGAGGGTGATCGGCCACACTGGGACTGAGACACGGCCCAG	0	0	0	0	0	0	0	0	0	0	0	0	0	0	0	576	0	0	0	0	0	0	0	0	0	0	0	0	0	0	0	0	0	0	0	0	0	0	0	0	0	0	0	0	0	0	0	0
744	GATGAACGCTGGCGGCGTGCCTAATACATGCAAGTCGAGCGAACAGACGAGGAGCTTGCTCCTCTGACGTTAGCGGCGGACGGGTGAGTAACATGTGGATAACCTACCTATAAGACTGGGATAACTTCGGGAAACCGGAGCTAATACCGGATAATATATTGAACCGCATGGTTCAATAGTGAAAGACGGTTTTGCTGTCACTTATAGATGGATCCGCGCCGCATTAGCTAGTTGGTAAGGTAACGGCTTACCAAGGCAACGATGCGTAGCCGACCTGAGAGGGTGATCGGCCACACTGGAACTGAGACACGGTCCAG	0	0	0	0	0	0	0	0	0	0	0	0	0	0	0	0	0	0	0	0	0	0	0	0	0	0	0	0	0	0	0	0	0	0	0	0	0	0	0	0	0	0	0	0	0	0	0	0
745	ATTGAACGCTGGCGGCATGCCTTACACATGCAAGTCGAACGGCAGCGCGGGAGCTTGCTCCTGGCGGCGAGTGGCGCACGGGTGAGTAATGCATCGGAACGTGTCTTCTTGTGGGGGATAACTGTCCGAAAGGACAGCTAATACCGCATAAGACCTGAGGGTGAAAGCAGGGGATCGCAAGACCTTGCGCAGGAAGAGCGGCCGATGTCCGATTAGCTAGTTGGCGGGGTAAAGGCCCACCAAGGCGACGATCGGTAGCTGGTCTGAGAGGACGACCAGCCACACTGGGACTGAGACACGGCCCAG	0	0	0	0	0	0	0	0	0	0	0	0	0	0	0	0	0	0	0	0	0	0	0	0	0	0	0	0	0	0	0	0	0	0	0	0	0	0	0	0	0	0	0	0	0	0	0	0
746	GACGAACGCTGGCGGCGTGCTTAACACATGCAAGTCGAACGAAAAGACGGAAAGAGCTTGCTCTTTTCAGAATTGAGTGGCAAACGGGTGAGTAACACGTAAACAACCTGCCTTCAGGATGGGGACAACAGACGGAAACGACTGCTAATACCGAATAAGTTCCAAGAGCCGCATGGCCCATGGAAGAAAAGGTGGCCTCTACCTGTAAGCTATCGCCTGAAGAGGGGTTTGCGTCTGATTAGCTGGTTGGAGGGGTAACGGCCCACCAAGGCGATGATCAGTAGCCGGTCTGAGAGGATGAACGGCCACACTGGAACTGAGACACGGTCCAG	0	0	0	0	0	0	0	0	0	0	0	0	0	0	0	0	0	0	0	0	0	0	0	0	0	0	0	0	0	0	0	607	0	0	0	0	0	0	0	0	0	0	0	0	0	0	0	0
747	GATGAACGCTAGCGGCAGGCTTAATACATGCAAGTCGTGGGGCAGCACAGAATAGCAATATTTGGGTGGCGACCGGCAAACGGGTGCGGAACACGTACACAACCTTCCGATAAGTGGGGGATAGCCCAGAGAAATTTGGATTAATACCCCGTAACATATAGAGATGGCATCGTCTTTATATTATAGCTTCGGCGCTTATTGATGGGTGTGCGTCTGATTAGGTAGTTGGCGGGGTAACGGCCCACCAAGCCTACGATCAGTAGCTGATGTGAGAGCATGATCAGCCACACGGGCACTGAGACACGGGCCCG	0	0	0	0	0	0	0	0	0	0	0	0	0	0	0	0	0	0	0	0	0	0	0	0	0	0	0	0	0	0	0	0	0	0	0	0	0	0	0	0	0	0	0	0	0	0	0	0
748	GATGAACGCTGGCGGCGCGCCTAACACATGCAAGTCGAACGGCACCCCTCTCCGGAGGGAAGCGAGTGGCGAACGGCTGAGTAACACGTGGAGAACCTGCCCCCTCCCCCGGGATAGCCGCCCGAAAGGACGGGTAATACCGGATACCCCGGGGTGCCGCATGGCACCCCGGCTAAAGCCCCGACGGGAGGGGATGGCTCCGCGGCCCATCAGGTAGACGGCGGGGTGACGGCCCACCGTGCCGACAACGGGTAGCCGGGTTGAGAGACCGACCGGCCAGATTGGGACTGAGACACGGCCCAG	0	0	0	0	0	0	0	0	0	0	0	0	0	0	0	0	0	0	0	72	0	0	0	0	0	89	0	0	0	0	0	0	0	0	0	2	0	0	0	0	0	0	0	0	0	0	0	0
749	GATGAACGCTGGCGGCGTGCCTAATACATGCAAGTCGAGCGAACAGACGAGGAGCTTGCTCCTCTGATGTTAGCGGCGGACGGGTGAGTAACACGTGGATAACCTACCTATAAGACTGGGATAACTTCGGGAAACCGGAGCTAATACCGGATAACATGTTAAACCGCATGGTTCAACAGTGAAAGACGGTCTTGCTGTCACTTATAGATGGATCCGCGCCGCATTAGCTAGTTGGTAAGGTAACGGCTTACCAAGGCAACGATGCGTAGCCGACCTGAGAGGGTGATCGGCCACACTGGAACTGAGACACGGTCCAG	0	0	0	0	0	0	0	0	0	0	0	0	0	0	0	593	0	0	0	0	0	0	0	0	0	0	0	0	0	0	0	0	0	0	0	0	0	0	0	0	0	0	0	0	0	0	0	0
750	ATTGAACGCTGGCGGCAGGCTTAACACATGCAAGTCGAGCGGGGGAAGGTAGCTTGCTACCGGACCTAGCGGCGGACGGGTGAGTAATGCTTAGGAATCTGCCTATTAGTGGGGGACAACATCTCGAAAGGGATGCTAATACCGCATACGTCCTACGGGAGAAAGCAGGGGATCTTCGGACCTTGCGCTAATAGATGAGCCTAAGTCGGATTAGCTAGTTGGTGGGGTAAAGGCCTACCAAGGCGACGATCTGTAGCGGGTCTGAGAGGATGATCCGCCACACTGGGACTGAGACACGGCCCAG	0	0	0	0	0	0	0	0	0	0	0	0	0	0	0	0	0	0	0	0	0	0	0	0	0	36	0	0	0	0	0	0	0	0	0	0	0	0	0	0	0	0	0	0	0	0	0	0
751	AACGAACGTTGGCGGCGCGCCTAACACATGCAAGTCGCACGAGAAAGGGAGCAATCCCCGGTACAGTGGCGCACGGGTGAGTAACACGTGGATAACCTTCCCACGAGTGGGGGATAACCTTCCGAAAGGAGGGCTAATACCGCATGAGACCACGGAGAGTTCGCTCTCTGAGGTCAAAGCTGGCCTCTTCATGAAAGCTAGCGCTTGTGGATGGGTCCGCGGCCCATCAGCTAGTAGGTGGGGTAAAAGCCTACCTAGGCAAAGACGGGTAGCTGGTCTGAGAGGATGATCAGCCACACTGGAACTGAGACACGGTCCAG	0	0	0	0	0	0	0	0	0	0	0	0	0	0	0	0	0	0	0	0	0	0	0	0	0	0	0	0	0	0	0	0	0	0	0	0	0	0	0	0	0	0	0	0	0	0	0	0
752	GACGAACGCTGGCGGCGTGCTTAACACATGCAAGTCGAGCGGTAAGGCCTTTCGGGGTACACGAGCGGCGAACGGGTGAGTAACACGTGGGTGATCTGCCCTGCACTTCGGGATAAGCCTGGGAAACTGGGTCTAATACCGGATATGACCTCCTATCGCATGGTGGGTGGTGGAAAGATTTATCGGTGCAGGATGGGCCCGCGGCCTATCAGCTTGTTGGTGGGGTAATGGACTACCAAGGCGACGACGGGTAGCCGACCTGAGAGGGTGACCGGCCACACTGGGACTGAGACACGGCCCAG	0	0	0	0	0	0	0	0	0	0	0	0	0	0	0	0	0	0	0	0	0	0	0	0	0	0	0	603	0	0	0	0	0	0	0	0	0	0	0	0	0	0	0	0	0	0	0	0
753	GACGAACGCTGGCGGCGTGCCTAATACATGCAAGTCGAGCGGACAGATGGGAGCTTGCTCCCTGAAGTCAGCGGCGGACGGGTGAGTAACACGTGGGCAACCTGCCTGTAAGACTGGGATAACTTCGGGAAACCGGAGCTAATACCGGATAACACCGAGGGCCTCATGGTCCTTGGTTGAAAGATGGCTTCGGCTATCACTTACAGATGGGCCCGCGGCGCATTAGCTAGTTGGTGAGGTAACGGCTCACCAAGGCGACGATGCGTAGCCGACCTGAGAGGGTGATCGGCCACACTGGGACTGAGACACGGCCCAG	0	0	0	0	0	0	0	0	0	0	0	0	0	0	0	0	0	0	0	0	0	0	0	0	0	0	0	0	2	0	2	0	0	0	0	0	0	0	0	0	0	0	0	0	0	0	0	0
754	GATGAACGCTGGCGGCGTGCTTAACACATGCAAGTCGAACGGGATCCATCGGGCTTTGCTTGGTGGTGAGAGTGGCGAACGGGTGAGTAATGCGTGACCGACCTGCCCCATGCACCGGAATAGCTCCTGGAAACGGGTGGTAATGCCGGATGCTCCATCACATCGCATGGTGTGTTGGGAAAGCCTTTGCGGCATGGGATGGGGTCGCGTCCTATCAGCTTGATGGCGGGGTAACGGCCCACCATGGCTTCGACGGGTAGCCGGCCTGAGAGGGCGACCGGCCACATTGGGACTGAGATACGGCCCAG	0	0	0	0	0	0	0	0	0	0	0	0	0	0	0	0	0	0	0	0	0	0	0	0	0	0	0	0	0	0	0	0	0	0	0	0	0	0	0	0	0	0	0	0	0	0	0	0
755	GACGAACGCTGGCGGCGTGCCTAATACATGCAAGTAGAACGCTGAAGAGAGGAGCTTGCTCTTCTTGGATGAGTTGCGAACGGGTGAGTAACGCGTAGGTAACCTGCCTTGTAGCGGGGGATAACTATTGGAAACGATAGCTAATACCGCATAACAATGGATGACACATGTCATTTATTTGAAAGGGGCAAATGCTCCACTACAAGATGGACCTGCGTTGTATTAGCTAGTAGGTGAGGTAACGGCTCACCTAGGCGACGATACATAGCCGACCTGAGAGGGTGATCGGCAACACTGGGACTGAGACACGGCCCAG	0	0	0	0	0	0	0	0	0	0	0	0	0	0	0	0	0	0	0	0	0	0	0	0	0	0	0	0	0	0	0	0	0	0	0	0	0	0	0	0	0	0	0	0	0	0	0	0
756	AGCGAACGCTGGCGGCGTGCTTAACACATGCAAGTCGAACGTGAAATGTAGCAATACAGAGTAAAGTGGCGCACGGGTGAGTAACACGTGGGTAATCTACCTTAGAGTCTGGAATAACCGGCCGAAAGGCTGGCTAATACTGGATAGTTCAAGCGCATTGTAAGGGTGCGATTGGGAAAGGGAGCCTGCAAGGGCCTTTGCTCTAAGATGAGCCCGCGTCTGATTAGCTAGTTGGTAGGGTAATGGCCTACCAAGGCGACGATCAGTAGCTGGTCTGAGAGGATGATCAGCCACACTGGAACTGAAACACGGTCCAG	0	0	0	0	0	0	0	0	0	0	0	0	0	0	0	0	0	0	0	0	0	0	0	0	0	0	0	599	0	0	0	0	0	0	0	0	0	0	0	0	0	0	0	0	0	0	0	0
757	GATGAACGCTGGCGGCGTGCCTAATACATGCAAGTCGAGCGAATGGATTAAGAGCTTGCTCTTATGAAGTTAGCGGCGGACGGGTGAGTAACACGTGGGTAACCTGCCCATAAGACTGGGATAACTCCGGGAAACCGGGGCTAATACCGGATAACATTTTGAACCGCATGGTTCGAAATTGAAAGGCGGCTTCGGCTGTCACTTATGGATGGACCCGCGTCGCATTAGCTAGTTGGTGAGGTAACGGCTCACCAAGGCAACGATGCGTAGCCGACCTGAGAGGGTGATCGGCCACACTGGGACTGAGACACGGCCCAG	0	0	0	0	0	0	0	0	0	0	542	0	0	0	0	0	0	0	0	0	0	0	0	0	0	0	0	0	0	0	0	0	0	0	0	0	0	0	0	0	0	0	0	0	0	0	0	0
758	GACGAACGCTGGCGGCGTGCTTAACACATGCAAGTCGAACGATGATGCTCCAGCTTTGTTGGGGTGGATTAGTGGCGAACGGGTGAGTAACACGTGAGTAACCTGCCCTCTTCTTTGGGATAACGGTCGGAAACGGCTGCTAATACTGGATATTCACTCATTGGCGCATGTTGGTGGGTGGAAAGGTTTTTCTGGTGGGGGATGGGCTCGCGGCCTATCAGCTTGTTGGTGGGGTGATGGCCTACCAAGGCTTTGACGGGTAACCGGCCTGAGAGGGTGACCGGTCACATTGGGACTGAGATACGGCCCAG	0	0	0	0	0	0	34	0	0	0	0	0	0	0	0	0	0	0	0	0	0	0	0	0	0	0	0	0	0	0	0	0	0	0	0	0	0	0	0	0	0	0	0	0	0	0	0	0
759	GATGAACGCTAGCTACAGGCTTAACACATGCAAGTCGCAGGGTAACGTGAGGAAAGCTTGCTTCCCTTGACGACGACTGGCGCACGGGTGAGTAACGCGTATCCAACCTTCCCATGACCACGGGATAACCCGTTGAAAGACGGACTAATACCGTATGACATCGTTTGCTGACATCAAATAACGATTAAAGGTTTGGCGGTGATGGATGGGGATGCGTCTGATTAGCTTGTTGGCGGGGTAACGGCCCACCAAGGCGACGATCAGTAGGGGTTCTGAGAGGAAGGTCCCCCACATTGGAACTGAGACACGGTCCAA	0	0	0	0	0	0	0	0	0	0	0	0	0	0	0	0	0	0	0	0	0	0	0	0	0	0	0	0	0	0	0	0	0	0	0	0	0	0	0	577	0	0	0	0	11	0	0	0
760	GACGAACGCTGGCGGCGTGCCTAATACATGCAAGTCGAGCGGACCGGATTGGGGCTTGCCTTGATTCGGTCAGCGGCGGACGGGTGAGTAACACGTGGGCAACCTGCCCGCAAGACCGGGATAACTCCGGGAAACCGGAGCTAATACCGGATAACACCGAAGACCGCATGGTCTTCGGTTGAAAGGCGGCCTTTGGGCTGTCACTTGCGGATGGGCCCGCGGCGCATTAGCTAGTTGGTGAGGTAACGGCTCACCAAGGCGACGATGCGTAGCCGGCCTGAGAGGGTGACCGGCCACACTGGGACTGAGACACGGCCCAG	0	0	0	0	0	0	0	0	0	0	0	0	0	0	0	0	0	0	0	0	0	0	0	0	0	0	0	0	0	0	0	0	0	0	0	0	0	0	0	0	0	0	0	0	0	0	0	0
761	GATAAACGCTGGCGGCGTGCGTAACACATGCAAGTCGAACGAGAATGTACTGACGGATCCTTAGGGTGAAGATAGTACAGGACAGTGGCGGATGGGTGAGTAACGCGTAAGAAACCTGCCTTTCACACCGGGATAGCAGCTGGAAACGGCTATTAATACCGGATGACACTTTTTCCCCGCATGAGGAAGAGGTTAAAGAATTTCGGTGAAAGATGGTCTTGCGTCTGATTAGCTAGTTGGTGGGGTAACGGCCTACCAAGGCGACGATCAGTAGCCGGCCTGAGAGGGTGTACGGCCACATTGGGACTGAGACACGGCCCAA	0	0	0	0	0	0	0	0	0	0	0	0	0	0	0	0	0	0	3	0	0	0	0	0	0	0	0	0	0	0	0	0	0	0	0	0	0	30	0	0	0	0	0	0	0	0	0	0
762	GACGAACGCTGGCGGCGTGCTTAACACATGCAAGTCGAACGGTGAAGCGCCTTCCTTTGTGGTGGGTGTGGATGAGTGGCGAACGGGTGAGTAACACGTGAGTAACCTGCCCCCTTCTTCTGGATAACCGCATGAAAGTGTGGCTAATACGGGATATTCTGTGCCTGCTGCATGGTGGGTGTGGGAAAGATTGCGCCTTTGGGTGTTTTTGGTGGGGGATGGGCTCGCGGCCTATCAGCTTGTTGGTGGGGTGATGGCCTACCAAGGCGGTGACGGGTAGCCGGCCTGAGAGGGTGGACGGTCACACTGGGACTGAGACACGGCCCAG	0	0	0	0	0	0	0	0	0	0	0	0	0	0	0	585	0	0	0	0	0	0	0	0	0	0	0	0	0	0	0	0	0	0	0	0	0	0	0	0	0	0	0	0	0	0	0	0
763	GATGAACGCTGGCGGCGTGCCTAATACATGCAAGTCGAGCGAACAGACGAGGAGCTTGCTCCTTTGACGTTAGCGGCGGACGGGTGAGTAACACGTAGGTAACCTACCTATAAGACTGGGATAACTTCGGGAAACCGGAGCTAATACCGGATAATATTTCGAACCGCATGGTTCGATAGTGAAAGATGGATTTGCTATCACTTATAGATGGACCTGCGCCGTATTAGCTAGTTGGTAAGGTAACGGCTTACCAAGGCAACGATACGTAGCCGACCTGAGAGGGTGATCGGCCACACTGGAACTGAGACACGGTCCAG	0	0	0	0	0	0	0	0	0	0	0	0	0	0	0	0	0	0	0	0	0	0	0	0	0	0	0	0	0	0	0	0	0	0	0	0	0	0	0	0	0	0	0	0	0	0	0	0
764	ATTGAACGCTGGCGGCATGCCTTACACATGCAAGTCGAACGGCAGCACGGGGGCAACCCTGGTGGCGAGTGGCGAACGGGTGAGTAATACATCGGAACGTGTCCTGTAGTGGGGGATAGCCCGGCGAAAGCCGGATTAATACCGCATACGCTCTACGGAGGAAAGGGGGGGATCTTAGGACCTCCCGCTACAGGGGTGGCCGATGGCAGATTAGCTAGTTGGTGGGGTAAAGGCCTACCAAGGCGACGATCTGTAGCTGGTCTGAGAGGACGACCAGCCACACTGGGACTGAGACACGGCCCAG	0	0	0	167	0	0	0	0	0	0	0	0	0	0	0	0	0	0	0	0	0	0	0	0	0	0	0	0	0	0	0	0	0	0	0	11	0	0	0	0	0	0	0	0	0	0	0	0
765	GATGAACGCTGGCGGCGTGCTTAACACATGCAAGTCGAACGGAAAGGCCCAAGCTTGCTTGGGTACTCGAGTGGCGAACGGGTGAGTAACACGTGGGTGATCTGCCCCGCACTTCGGGATAAGCCTGGGAAACTGGGTCTAATACCGGATAGGACAGTGGTTTGGATGCCATTGTGGAAAGTTTTTTCGGTGTGGGATGAGCTCGCGGCCTATCAGCTTGTTGGTGGGGTAATGGCCTACCAAGGCGTCGACGGGTAGCCGGCCTGAGAGGGTGTACGGCCACATTGGGACTGAGATACGGCCCAG	0	0	0	0	0	0	0	0	0	0	0	0	0	0	0	0	0	0	0	0	0	0	0	0	0	0	0	0	0	0	0	0	0	0	0	0	0	0	0	0	0	0	0	0	0	0	0	0
766	ATTGAACGCTGGCGGCAGGCTTAACACATGCAAGTCGAACGGTAGCAGGAGAAAGCTTGCTTTCTTGCTGACGAGTGGCGGACGGGTGAGTAATGCTTGGGAATCTGGCTTATGGAGGGGGATAACTACGGGAAACTGTAGCTAATACCGCGTAGTGTCGAGAGACGAAAGTGCGGGACCGCAAGGCCGCATGCCATGAGATGAGCCCAAGTGGGATTAGGTAGTTGGTGGGGTAAAGGCCTACCAAGCCTGCGATCTCTAGCTGGTCTGAGAGGATGGCCAGCCACACTGGAACTGAGACACGGTCCAG	0	0	0	0	0	0	0	0	0	0	0	0	0	0	0	586	0	0	0	0	0	0	0	0	0	0	0	0	0	0	0	0	0	0	0	0	0	0	0	0	0	0	0	0	0	0	0	0
767	GACGAACGCTGGCGGCGTGCTTAACACATGCAAGTCGAACGATGAAAGTCGTTTTGATATCTTCGGATTGATAAACTTCTGGATTAGTGGCGGACGGGTGAGTAACGCGTGAGCAATCTGCCTTACACAAAGGGATAGCCTCGGGAAACCGGGATTAATACCATATGATATCACATTTTCGCATGAAGAAGTGATTAAAGAATTTCGGTGTAAGATGAGCTCGCGTCCCATTAATTAGTTGGTGAGGGTAACGGCCCACCAAGATAGCGATGGGTAGCCGATCTAAGAGGATGACCGGCCACATTGGAACTGAGAAACGGTCCAA	0	0	0	0	0	0	0	0	0	0	0	0	0	0	0	0	0	0	0	0	0	0	0	0	0	0	0	0	0	0	0	0	0	0	0	0	0	0	0	0	0	0	0	0	0	0	0	0
768	GATGAACGCTGGCGGCGTGCTTAACACATGCAAGTCGAACGGAAAGGCCCAAGCTTGCTTGGGTACTCGAGTGGCGAACGGGTGAGTAACACGTGGGTGATCTGCCCTGCACTTCGGGATAAGCCTGGGAAACTGGGTCTAATACCGGATAGGACCACTTCTTGGATGTTGTGGTGGAAAGTTTTTTCGGTGTGGGATGAGCTCGCGGCCTATCAGCTTGTTGGTGGGGTAATGGCCTACCAAGGCGTCGACGGGTAGCCGGCCTGAGAGGGTGTACGGCCACATTGGGACTGAGATACGGCCCAG	0	0	0	0	0	0	0	0	0	0	0	0	0	0	0	0	0	0	0	0	0	0	0	0	0	0	0	0	0	0	0	0	0	0	0	0	0	0	0	0	0	0	0	0	0	0	129	0
769	GACGAACGCTGGCGGCGTGCCTAATACATGCAAGTAGAACGCTGAAGAGAGGAGCTTGCTCTTCTTGGATGAGTTGCGAACGGGTGAGTAACGCGTAGGTAACCTGCCTTGTAGCGGGGGATAACTATTGGAAACGATAGCTAATACCGCATAACAATGGGTGACACATGTCATTTATTTGAAAGGGGCAATTGCTCCACTACAAGATGGACCTGCGTTGTATTAGCTAGTAGGTGAGGTAACGGCTCACCTAGGCGACGATACATAGCCGACCTGAGAGGGTGATCGGCCACACTGGGACTGAGACACGGCCCAG	0	0	0	0	0	0	0	0	0	0	0	0	0	0	0	0	0	0	0	0	0	0	0	0	0	0	0	0	0	0	0	0	0	0	0	0	0	0	0	0	0	0	0	0	0	0	0	0
770	GATGAACGCTAGCGATAGGCTTAACACATGCAAGTCGAGGGGCAGCATGGTCTTAGCTTGCTAAGACTGATGGCGACCGGCGCACGGGTGCGTAACGCGTATGCAACTTGCCTCACAGAGGGGGATAACCCGTCGAAAGACGGACTAATACCGCGTACACTCCATCTTGGGCATCCAAGGTAGAGGAAATGAAATTCGCTGTGAGATAGGCATGCGTCCCATTAGCTAGTTGGTGAGGTAACGGCTCACCAAGGCGACGATGGGTAGGGGAACTGAGAGGTTGAACCCCCACACTGGTACTGAGACACGGACCAG	0	0	0	0	0	0	0	0	0	0	0	0	0	0	0	589	0	0	0	0	0	0	0	0	0	0	0	0	0	0	0	0	0	0	0	0	0	0	0	0	0	0	0	0	0	0	0	0
771	ATTGAACGCTGGCGGCAGGCCTAACACATGCAAGTCGAGCGGTAACAGGAGAAAGCTTGCTTTCTTGCTGACGAGCGGCGGACGGGTGAGTAATGTATGGGGATCTGCCCGATAGAGGGGGATAACTACTGGAAACGGTGGCTAATACCGCATAATGTCTACGGACCAAAGCAGGGGCTCTTCGGACCTTGCACTATCGGATGAACCCATATGGGATTAGCTAGTAGGTGGGGTAAAGGCTCACCTAGGCGACGATCTCTAGCTGGTCTGAGAGGATGATCAGCCACACTGGGACTGAGACACGGCCCAG	0	0	0	0	0	0	0	0	0	0	0	0	0	0	0	0	0	0	0	0	0	0	0	0	0	0	0	0	0	0	0	0	0	120	0	0	0	0	0	0	0	0	0	0	0	0	0	0
772	GACGAACGCTGGCGGCGTGCTTAACACATGCAAGTCGAACGGAAAGGCCAGTGCTTGCACTGGTGCTCGAGTGGCGAACGGGTGAGTAACACGTGGGTGATCTGCCTTGCACTCTGGGATAAGCTTGGGAAACTGGGTCTAATACCGGATATGAACTGCCTTTAGTGTGGTGGTTGGAAAGTTTTTTCGGTGCAAGATGAGCTCGCGGCCTATCAGCTTGTTGGTGGGGTAATGGCCTACCAAGGCGTCGACGGGTAGCCGGCCTGAGAGGGTGTACGGCCACATTGGGACTGAGATACGGCCCAG	0	0	0	0	0	0	0	0	0	0	0	0	0	0	0	0	0	0	0	0	0	0	0	0	0	0	0	0	0	0	0	0	0	0	0	0	0	0	0	0	0	0	0	0	0	0	0	0
773	GACGAACGCTGGCGGCGCGCTTAACACATGCAAGTCGAGCGATGAAATTTTGACAGAACCCTTCGGGGTGAAGACAAAATGGATTAGCGGCGGACGGGTGAGTAACACGTGAGTAACCTGCCTTAGACATTGGGATAGCCTCGGGAAACCGGGATTAATACCGAATAAAATCATAGGTGCACATGCACTAATGATCAAAACTCCGGTGGTCTAAGATGGACTCGCGTCCCATTAGCTAGTTGGTAGGGTAACGGCCTACCAAGGCGACGATGGGTAGCCGGCCTGAGAGGGTGAACGGCCACATTGGAACTGAGAAACGGTCCAA	0	0	0	0	0	0	0	0	0	0	0	0	0	0	0	0	0	0	0	0	0	0	0	0	0	0	0	0	0	0	0	0	0	0	0	0	0	0	0	0	0	0	0	0	0	0	0	0
774	GACGAACGCTGGCGGCGTGCCTAATACATGCAAGTCGAGCGAGCTTGCCTAGATGATTTTAGTGCTTGCACTAAATGAAACTAGATACAAGCGAGCGGCGGACGGGTGAGTAACACGTGGGTAACCTGCCCAAGAGACTGGGATAACACCTGGAAACAGATGCTAATACCGGATAACAACACTAGACGCATGTCTAGAGTTTAAAAGATGGTTCTGCTATCACTCTTGGATGGACCTGCGGTGCATTAGCTAGTTGGTAAGGTAACGGCTTACCAAGGCAATGATGCATAGCCGAGTTGAGAGACTGATCGGCCACATTGGGACTGAGACACGGCCCAA	0	0	0	0	0	0	0	0	0	0	0	0	0	42	0	0	0	0	0	0	0	0	0	2	0	0	0	0	0	0	0	0	0	0	0	0	0	0	0	0	0	0	0	0	0	0	0	0
775	GATGAACGCTGGCGGCGTGCTTAACACATGCAAGTCGAACGAAGCACTCTATTTGATTTTCTTCGGAAATGAAGATTTTGTGACTGAGTGGCGGACGGGTGAGTAACGCGTGGGTAACCTGCCTCATACAGGGGGATAACAGTTGGAAACGACTGCTAATACCGCATAAGCGCACAGGATCGCATGATCCGGTGTGAAAAACTCCGGTGGTATGAGATGGACCCGCGTCTGATTAGCCAGTTGGCAGGGTAACGGCCTACCAAAGCGACGATCAGTAGCCGACCTGAGAGGGTGACCGGCCACATTGGGACTGAGACACGGCCCAA	0	0	0	0	0	0	0	0	0	0	0	0	0	0	0	0	0	0	0	39	0	0	0	0	0	0	0	0	0	0	0	0	0	0	0	0	0	0	0	0	0	0	0	0	0	0	0	0
776	GATTAACGCTGGCGGCGTGCATAACACATGCAAGTCGAACGATGAAACCCAACTGAATTCTTCGGAATGATTTTGGGTGGATTAGTGGCGGACGGGTGAGTAACGCGTGAGTAACCTGCCTTAGAGAAGGGGATAGCCTTTGGAAACGAAGAATAATACCCTATGACACCAACACCTCGCATGAAGAGTTGGTCAAAGATTTATCGCTCTAAGATGGACTTGCGTCTGATTAGTTAGTTGGTGAGGTAACGGCTCACCAAGACAGCGATCAGTAGCCGGCTTGAGAGAGTGTACGGCCACATTGGGACTGAGACACGGCCCAG	0	0	0	0	0	0	0	0	0	0	0	0	0	0	0	0	0	0	0	0	0	0	0	0	0	0	0	0	0	0	0	0	0	0	0	0	0	0	0	0	0	0	0	0	0	0	0	0
777	ATTGAACGCTGGCGGCAGGCTTAACACATGCAAGTCGAACGGTAACATAAAGAAGCTTGCTTCTTTGATGACGAGTGGCGGACGGGTGAGTAATGCTTGGGAATCTAGCTTATGGAGGGGGATAACTACGGGAAACTGTAGCTAATACCGCGTAGAATCGGGAGATGAAAGTGTGGGACCTTCGGGCCACATGCCATAGGATGAGCCCAAGTGGGATTAGGTAGTTGGTGAGGTAAAGGCTCACCAAGCCGACGATCTCTAGCTGGTCTGAGAGGATGACCAGCCACACTGGGACTGAGACACGGCCCAG	0	0	0	0	0	0	0	0	0	0	0	0	0	0	0	0	0	0	0	0	0	0	0	0	0	0	0	0	0	0	0	0	0	0	0	0	0	0	0	0	0	0	0	0	0	0	0	0
778	GATGAACGCTAGCTACAGGCTTAACACATGCAAGTCGAGGGGAAACGATATTGGAAGCTTGCTTCCGATAGGCGTCGACCGGCGCACGGGTGAGTAACGCGTATCCAACCTGCCCACCACTTGGGGATAACCTTGCGAAAGTAAGACTAATACCCAATGATATCTCTAGAAGACATCTGAAAGAGATTAAAGATTTATCGGTGATGGATGGGGATGCGTCTGATTAGCTTGTTGGCGGGGTAACGGCCCACCAAGGCAACGATCAGTAGGGGTTCTGAGAGGAAGGTCCCCCACATTGGAACTGAGACACGGTCCAA	0	0	0	0	0	0	0	0	0	0	0	0	0	0	0	0	0	0	0	1	0	0	0	0	0	30	97	0	0	0	0	0	0	0	0	0	0	0	0	0	0	0	0	0	0	0	0	0
779	GACGAACGCTGGCGGCGTGCCTAATACATGCAAGTCGAGCGGACAGATGGGAGCTTGCTCCCTGATGTTAGCGGCGGACGGGTGAGTAACACGTGGGTAACCTGCCTGTAAGACTGGGATAACTCCGGGAAACCGGGGCTAATACCGGATGGTTGTTTGAACCGCATGGTTCAAACATAAAAGGTGGCTTCGGCTACCACTTACAGATGGACCCGCGGCGCATTAGCTAGTTGGTGAGGTAATGGCTCACCAAGGCAACGATGCGTAGCCGACCTGAGAGGGTGATCGGCCACACTGGGACTGAGACACGGCCCAG	0	0	0	0	0	0	0	0	0	0	576	0	0	0	0	0	0	0	0	0	0	0	0	0	0	0	0	0	0	0	0	0	0	0	0	0	0	0	0	0	0	0	0	0	0	0	0	0
780	GACGAACGCTGGCGGCGTGCTTAACACATGCAAGTCGAACGCTGAAGACCTGGCTTTTGTTGGGTTGGATGAGTGGCGAACGGGTGAGTAACACGTGAGTAACCTGCCCCCTTCTTTGGGATAACGCCCGGAAACGGGTGCTAATACTGGATATTCACTGGCCTTCGCATGGGGGTTGGTGGAAAGGTTTGTTCTGGTGGGGGATGGGCTCGCGGCCTATCAGCTTGTTGGTGGGGTGATGGCCTACCAAGGCTTTGACGGGTAGCCGGCCTGAGAGGGTGACCGGTCACATTGGGACTGAGATACGGCCCAG	0	0	0	0	0	0	0	0	0	0	0	0	0	0	0	0	0	0	0	0	0	0	0	0	0	0	0	0	0	0	0	0	0	0	0	0	0	0	0	0	0	0	0	0	0	0	0	0
781	GACGAACGCTGGCGGCGTGCTTAACACATGCAAGTCGAACGATGAACTGGAGCTTGCTCCAGGAATTAGTGGCGAACGGGTGAGTAACACGTGAGTAACCTGCCCTTGACTCTGGGATAAGCGCTGGAAACGGCGTCTAATACCGGATACGAGCTTCAGCCGCATGGCTAGGAGTTGGAAAGAATTTCGGTCAAGGATGGACTCGCGGCCTATCAGCTAGTTGGTGAGGTAATGGCTCACCAAGGCGACGACGGGTAGCCGGCCTGAGAGGGTGACCGGCCACACTGGGACTGAGACACGGCCCAG	0	0	0	0	0	0	0	0	0	0	0	0	0	0	0	571	0	0	0	0	0	0	0	0	0	0	0	0	0	0	0	0	0	0	0	0	0	0	0	0	0	0	0	0	0	0	0	0
782	GACGAACGCTGGCGGCGTGCTTAACACATGCAAGTCGAACGATGAAAGAGAATCCGATCTCTTCGGAGTGAAGAATCTCTGGATTAGTGGCGGACGGGTGAGTAACGCGTGAGCAATCTGCCTTACACAAAGGGATAGCCTCGGGAAACCGGGATTAATACCATATGATATCTATTAACCGCATGGTTTATAGATTAAAGAATTTCGGTGTAAGATGAGCTCGCGTCCCATTAATTAGTTGGTGAGGGTAACGGCCCACCAAGATAGCGATGGGTAGCCGATCTAAGAGGATGACCGGCCACATTGGAACTGAGAAACGGTCCAA	0	0	0	0	0	0	0	0	0	0	0	0	0	0	0	0	0	0	0	0	0	0	0	0	0	0	0	0	0	0	0	0	0	0	0	0	0	0	0	0	0	0	129	0	0	0	0	0
783	ATTGAACGCTGGCGGCAGGCCTAACACATGCAAGTCGAACGGTAGCACAGAGAGCTTGCTCTCGGGTGACGAGTGGCGGACGGGTGAGTAATGTCTGGGAAACTGCCTGATGGAGGGGGATAACTACTGGAAACGGTAGCTAATACCGCATAACGTCGCAAGACCAAAGAGGGGGACCTTCGGGCCTCTTGCCATCAGATGTGCCCAGATGGGATTAGCTAGTAGGCGGGGTAACGGCCCACCTAGGCGACGATCCCTAGCTGGTCTGAGAGGATGACCAGCCACACTGGAACTGAGACACGGTCCAG	0	0	0	0	0	0	0	0	0	0	0	0	0	0	145	0	0	0	0	0	0	0	0	0	0	0	0	0	0	0	0	0	0	0	0	0	0	0	0	0	0	0	0	0	0	0	0	0
784	GACGAACGCTGGCGGCGTGCTTAACACATGCAAGTCGAACGGTGACCCTCGGAGCTTGCTTCGGGGTGAACAGTGGCGAACGGGTGAGTAACACGTGAGTAACCTGCCCCTGACTCTGGAATAAGCGCTGGAAACGGCGTCTAATACCGGATACGACACGCCTCCGCATGGGGAGCGTGTGGAAAGTTTTTCGGTCTGGGATGGACTCGCGGCCTATCAGCTTGTTGGTGAGGTAATGGCTCACCAAGGCGATGACGGGTAGCCGGCCTGAGAGGGCGACCGGCCACACTGGGACTGAGACACGGCCCAG	0	0	0	0	0	0	0	0	0	0	0	0	0	0	0	0	0	0	0	0	0	0	0	0	0	0	0	0	0	0	0	0	0	0	0	0	0	0	0	0	0	0	0	0	0	0	0	0
785	GATGAACGCTAGCGGCAGGCCTAATACATGCAAGTCGAACGAGATCAGGGGCTTCGGTTCCTGGTTTAGTGGCGCACGGGTGCGTAACGCGTATGCAACCTACCTTCTATTGGGGGATAGCCTTCCGAAAGGGAGATTAATACCGCATAAGACCACGGTCCTGGCATCGGGATGTGGTTAAAGCTGAGGCGATAGAAGATGGGCATGCGTGCCATTAGCTAGTTGGTTGAGGTAACGGCTCACCAAGGCTTCGATGGCTAGGGGTTCTGAGAGGATGGTCCCCCACACTGGTACTGAGACACGGACCAG	0	0	0	0	0	0	0	0	0	0	0	0	0	0	0	0	0	0	0	0	0	0	0	0	0	0	0	0	0	0	0	0	0	0	0	0	0	0	0	0	0	0	0	0	0	0	0	0
786	GACGAACGCTGGCGGCGTGCTTAACACATGCAAGTCGAACGGAAATTATAGGAAGCTTGCTTCTTGTAATTTTAGTGGCGAACGGGTGAGTAACGCGTAACCAACCTGCCCTTCAGAGGGGGATAACAACGGGAAACCGTTGCTAATACCGCGTACGAATGAACTTCGGCATCGGAGCTCATTGAAAGGTGGCCTCTATTTATAAGCTATCGCTGAAGGAGGGGGTTGCGTCTGATTAGCTAGTTGGAGGGGTAACGGCCCACCAAGGCAATGATCAGTAGCCGGTCTGAGAGGATGAACGGCCACATTGGGACTGAGACACGGCCCAA	0	0	0	0	0	0	0	0	0	0	0	0	0	0	0	0	0	0	0	0	0	0	0	0	3	0	131	0	0	0	0	0	0	0	0	0	0	0	0	0	0	0	0	0	0	0	0	0
787	GATGAACGCTGGCGGCGTGCTTAACACATGCAAGTCGAACGGGATCCCAGGAGCTTGCTCCTGGGTGAGAGTGGCGAACGGGTGAGTAATGCGTGACCGACCTGCCCCATACACCGGAATAGCTCCTGGAAACGGGTGGTAATGCCGGATGCTCCAGTTGGATGCATGTCCTTCTGGGAAAGATTCATCGGTATGGGATGGGGTCGCGTCCTATCAGCTTGATGGCGGGGTAACGGCCCACCATGGCTTCGACGGGTAGCCGGCCTGAGAGGGCGACCGGCCACATTGGGACTGAGATACGGCCCAG	0	0	0	0	0	0	0	0	0	0	0	0	0	0	0	0	0	0	0	277	0	0	0	0	0	18	0	0	0	0	0	0	0	0	0	0	0	0	0	0	0	0	0	0	0	0	0	0
788	GATGAACGCTGGCGGCGTGCTTAACACATGCAAGTCGAACGGAAAGGCCAGTGCTTGCACTGGTACTCGAGTGGCGAACGGGTGAGTAACACGTGGGTGATCTGCCCTGCACTTCGGGATAAGCCTGGGAAACTGGGTCTAATACCGGATAGGACGATGGTTTGGATGCCATTGTGGAAAGTTTTTTCGGTGTGGGATGAGCTCGCGGCCTATCAGCTTGTTGGTGGGGTAATGGCCTACCAAGGCGTCGACGGGTAGCCGGCCTGAGAGGGTGTACGGCCACATTGGGACTGAGATACGGCCCAG	0	0	0	0	0	0	0	0	0	0	0	0	0	0	0	0	0	0	0	0	0	0	0	0	0	0	0	0	0	0	0	0	0	0	0	0	0	0	0	0	0	0	0	0	0	0	0	0
789	GATAAACGCTGGCGGCGTGCGTAACACATGCAAGTCGAACGAGAATGTACTGACAGATCCTTAGGGTGAAGATAGTACAGGACAGTGGCGGATGGGTGAGTAACGCGTAAGAAACCTGCCTTTCACACCGGGATAGCAGCTGGAAACGGCTATTAATACCGGATGACACTTTTTCCCCGCATGAGGAAGAGGTTAAAGAATTTCGGTGAAAGATGGTCTTGCGTCTGATTAGCTAGTTGGTGGGGTAACGGCCTACCAAGGCGACGATCAGTAGCCGGCCTGAGAGGGTGTACGGCCACATTGGGACTGAGACACGGCCCAA	0	0	0	0	0	0	0	0	0	0	0	0	0	0	0	0	0	0	0	0	0	0	0	0	0	0	0	0	0	0	0	0	0	0	0	0	0	0	0	0	0	0	0	0	0	0	0	0
790	GACGAACGCTGGCGGCGCGCCTAACACATGCAAGTCGAACGAGAGATGAGGAGCTTGCTCTTCAAATCGAGTGGCGAACGGGTGAGTAACGCGTGAGGAACCTGCCTCAAAGAGGGGGACAACAGTTGGAAACGACTGCTAATACCGCATAAGCCCACGGCTCGGCATCGAGCAGAGGGAAAAGGAGCAATCCGCTTTGAGATGGCCTCGCGTCCGATTAGCTAGTTGGTGAGGTAACGGCCCACCAAGGCGACGATCGGTAGCCGGACTGAGAGGTTGAACGGCCACATTGGGACTGAGACACGGCCCAG	0	0	0	0	0	0	0	0	0	0	0	0	0	0	0	0	0	0	0	0	0	0	0	0	0	60	0	0	0	0	0	0	0	0	0	0	0	0	0	0	0	0	0	0	0	0	0	0
791	GACGAACGCTGGCGGCGTGCTTAACACATGCAAGTCGAACGGGATTTAGTAGACAGAAACCTCGGTGGAAGATTACTAATGAGAGTGGCGAACGGGTGAGTAACGCGTGAGCAACCTGCCTATGACAGTGGGATAGCCTCGGGAAACCGGGATTAATACCGCATAAAATCGTAGAAACACATGTTTCAACGGTCAAAGATTTATCGGTCATAGATGGGCTCGCGTCTGATTAGCTAGTTGGTGAGATAACAGCCCACAAAGGCGACGATCAGTAGCCGGTCTGAGAGGATGAACGGCCACATTGGAACTGAGACACGGTCCAA	0	0	0	0	0	0	0	0	0	0	0	0	0	0	0	0	0	0	0	0	0	0	0	0	0	0	0	0	0	0	0	0	0	0	0	0	0	0	0	0	0	0	0	0	0	0	0	0
792	GATGAACGCTGGCGGCGTGCCTAATACATGCAAGTAGAACGCTGAAGCTTGGTGCTTGCACCGAGCGGATGAGTTGCGAACGGGTGAGTAACGCGTAGGTAACCTGCCTCTTAGCGGGGGATAACTATTGGAAACGATAGCTAATACCGCATAAAAGTCGACATTGCATGATGTTGATTTGAAAGGTGCAATTGCATCACTAAGAGATGGACCTGCGTTGTATTAGCTAGTTGGTGAGGTAACGGCTCACCAAGGCGACGATACATAGCCGACCTGAGAGGGTGATCGGCCACACTGGGACTGAGACACGGCCCAG	0	0	0	0	0	0	0	0	0	0	0	0	0	0	0	0	0	0	0	0	0	0	0	0	0	0	0	0	0	0	0	0	0	0	0	0	0	0	0	0	0	0	0	0	0	0	0	0
793	ATTGAACGCTGGCGGCAGGCCTAACACATGCAAGTCGAACGGTAGCACAGAGAGCTTGCTCTCGGGTGACGAGTGGCGGACGGGTGAGTAATGTCTGGGAAACTGCCTGATGGAGGGGGATAACTACTGGAAACGGTAGCTAATACCGCATAACGTCGCAAGACCAAAGAGGGGGACCTTCGGGCCTCTTGCCATCAGATGTGCCCAGATGGGATTAGCTAGTAGGCGGGGTAATGGCCCACCTAGGCGACGATCCCTAGCTGGTCTGAGAGGATGACCAGCCACACTGGAACTGAGACACGGTCCAG	0	0	0	0	0	0	0	0	0	0	0	0	0	0	0	0	0	0	0	6	23	0	0	0	0	0	0	0	0	0	0	0	0	0	0	0	0	0	0	0	0	0	0	0	0	0	0	0
794	GATGAACGCTAGCGACAGGCTTAACACATGCAAGTCGAGGGGCAGCGGGGAGGTAGCAATACTTCCGCCGGCGACCGGCGCACGGGTGAGTAACACGTATGGAACCTGCCCGTAGCAGGGGGATAAGCGGAAGAAATTCCGTCTAATACCGCGTAATAACTCCGAGAGGCATCTCATGGAGTTTAAAGGGTAACACCGGCTACGGATGGCCATGCGGCGCATTAGGCAGTAGGCGGGGTAACGGCCCACCTAACCGACGATGCGTAGGGGTTCTGAGAGGAAGGTCCCCCACACTGGTACTGAGACACGGACCAG	0	0	0	0	0	0	0	0	0	0	0	0	0	0	0	562	0	0	0	0	0	0	0	0	0	0	0	0	0	0	0	0	0	0	0	0	0	0	0	0	0	0	0	0	0	0	0	0
795	GACGAACGCTGGCGGCGTGCTTAACACATGCAAGTCGAGCGGTAAGGCCCTTTGGGGTACACGAGCGGCGAACGGGTGAGTAACACGTGGGTGACCTGCCCCCTACTCTGGGATAAGCCTGGGAAACTGGGTCTAATACCGGATATGACCTGCGGTTGCATGGTTGTGGGTGGAAAGTGGTGTTTTCGGACACTGTCGGTGGGGGATGGGCCCGCGGCCTATCAGCTTGTTGGTGGGGTGATGGCCTACCAAGGCGACGACGGGTAGCCGGCCTGAGAGGGCGACCGGCCACACTGGGACTGAGACACGGCCCAG	0	0	0	0	0	0	0	0	0	0	0	0	0	0	0	0	0	0	0	0	0	0	0	0	0	0	0	0	0	0	0	0	0	0	0	0	0	0	0	0	0	0	0	0	0	0	0	0
796	GATGAACGCTGGCGGCGTGCCTAATACATGCAAGTCGAACGCGAGCAGCAATGCTCGAGTGGCGAACGGGTGAGTAATACATAAGTAACCTGCCCTAGACAGGGGGATAACTGCTGGAAACGGCAGCTAAGACCGCATAGGTATGGACACTGCATGGTGACCATATTAAAAGTGCCAAGGCACTGGTAGAGGATGGACTTATGGCGCATTAGCTGGTTGGTGAGGTAACGGCTCACCAAGGCGACGATGCGTAGCCGACCTGAGAGGGTGACCGGCCACACTGGGACTGAGACACGGCCCAG	0	0	0	0	0	0	0	0	0	0	0	0	0	0	0	0	0	0	0	0	0	0	0	0	0	7	0	0	0	0	0	0	0	0	0	0	0	0	0	0	0	0	0	0	0	0	0	0
797	AGTGAACGCTGGCGGCGTGCCTAATACATGCAAGTCGAACGAACGAATAAGAGCTTGCTCTTATAAGTTAGTGGCGCACGGGTGAGTAATATATAGCTAATCTGCCTCTTAGTAGAGGATAACAGTCGGAAACGATTGCTAATACTCTATACTTCTGCTTTACATAAGTAAAGTAGAGAAAGTTTTTCGCTAAGAGATGAGGCTATACTGTATCAGCTAGTTGGTAAGGTAACGGCTTACCAAGGCTATGACGCATAACTGGTCTGAGAGGATGATCAGTCACATTGGAACTGAGACACGGTCCAA	0	0	0	0	0	0	0	0	0	0	0	0	0	0	0	0	0	0	0	23	0	0	0	0	0	0	0	0	0	0	0	0	0	0	0	0	0	0	0	0	0	0	31	0	0	0	0	0
798	GATGAACGCTAGCTACAGGCTTAACACATGCAAGTCGAGGGGAAACGACATTGAAAGCTTGCTTTTGATGGGCGTCGACCGGCGCACGGGTGAGTAACGCGTATCCAACCTGCCCACCACTTGGGGATAACCTTGCGAAAGTAAGACTAATACCCAATGATATCTCTAGAAGGCATCTGAAAGAGATTAAAGATTTATCGGTGATGGATGGGGATGCGTCTGATTAGCTTGTTGGCGGGGTAACGGCCCACCAAGGCAACGATCAGTAGGGGTTCTGAGAGGAAGGTCCCCCACATTGGAACTGAGACACGGTCCAA	0	0	0	0	0	0	0	0	0	0	0	0	0	0	0	0	0	0	0	0	0	0	0	0	0	0	0	0	0	0	0	0	0	0	0	0	0	0	0	0	0	0	0	0	0	0	0	0
799	GACGAACGCTGGCGGCGTGCCTAATACATGCAAGTAGAACGCTGAAGGAGAAGCTTGCTTCTCCGGATGAGTTGCGAACGGGTGAGTAACGCGTAGGTAACCTGCCTGGTAGCGGGGGATAACTATTGGAAACGATAGCTAATACCGCATAACAGTAGATATTGCATGATATCTGCTTGAAAGGTGCAATTGCATCACTACCAGATGGACCTGCGTTGTATTAGCTAGTTGGTGAGGTAACGGCTCACCAAGGCGACGATACATAGCCGACCTGAGAGGGTGATCGGCCACACTGGGACTGAGACACGGCCCAG	0	0	0	0	0	0	0	0	0	0	0	0	0	0	0	0	0	0	0	0	0	0	0	0	0	0	0	0	0	0	0	0	0	0	0	0	0	0	0	0	0	0	0	0	0	0	0	0
800	GATGAACGCTGGCGGCGTGCCTAATACATGCAAGTCGAGCGAACAGATAAGGAGCTTGCTCCTTTGACGTTAGCGGCGGACGGGTGAGTAACACGTGGATAACCTACCTATAAGACTGGGATAACTTCGGGAAACCGGAGCTAATACCGGATAACATATTGAACCGCATGGTTCAATAGTGAAAGGCGGCTTTGCTGTCACTTATAGATGGATCCGCGCCGTATTAGCTAGTTGGTAAGGTGACGGCTTACCAAGGCAACGATACGTAGCCGACCTGAGAGGGTGATCGGCCACACTGGAACTGAGACACGGTCCAG	0	0	0	0	0	0	0	0	0	0	0	0	0	0	0	0	0	0	0	0	0	0	0	0	0	0	0	0	0	0	0	0	0	0	0	0	0	0	0	0	0	0	0	0	0	0	0	0
801	GACGAACGCTGGCGGCGTGCCTAATACATGCAAGTCGAGCGAGCGGAACTAACAGATTTACCTCGGTAATGACGTTAGGAAAGCGAGCGGCGGATGGGTGAGTAACACGTGGGGAACCTGCCCCATAGTCTGAGATACCACTTGGAAACAGGTGCTAATACCGGATAAGAAAGCAGATCGCATGATCAGCTTTTAAAAGGCGGCGTAAGCTGTCGCTATGGGATGGCCCCGCGGTGCATTAGCTAGTTGGTAAGGTAAAGGCTTACCAAGGCGATGATGCATAGCCGAGTTGAGAGACTGATCGGCCACATTGGGACTGAGACACGGCCCAA	0	0	0	0	0	0	0	0	0	0	0	0	0	0	0	0	0	0	0	0	0	0	0	0	0	0	0	0	0	0	0	0	0	0	0	0	0	0	0	0	0	0	0	0	0	0	0	0
802	GACGAACGCTGGCGGCGTGCCTAATACATGCAAGTAGAACGCTGAAGGAGGAGCTTGCTTCTCCGGATGAGTTGCGAACGGGTGAGTAACGCGTAGGTAACCTGCCTGGTAGTGGGGGATAACTATTGGAAACGATAGCTAATACCGCATAATAGCAGTTGTTGCATGACAACTGTTTGAAAGGTGCAATTGCACCACTACCAGATGGACCTGCGTTGTATTAGCTAGTTGGTGGGGTAACGGCTCACCAAGGCGACGATACATAGCCGACCTGAGAGGGTGATCGGCCACACTGGGACTGAGACACGGCCCAG	0	0	0	0	0	0	0	0	0	0	0	0	0	0	0	0	0	0	0	210	0	0	0	0	0	61	0	0	0	0	0	0	0	0	0	0	0	0	0	0	0	0	0	0	0	0	0	0
803	GACGAACGCTGGCGGCGTGCCTAATACATGCAAGTAGAACGCTGAAGAGAGGAGCTTGCTCTTCTTGGATGAGTTGCGAACGGGTGAGTAACGCGTAGGTAACCTGCCTGGTAGCGGGGGATAACTATTGGAAACGATAGCTAATACCGCATGAAATTGCTTATCGCATGATAATTAATTGAAAGATGCAATTGCATCACTACCAGATGGACCTGCGTTGTATTAGCTAGTTGGTGAGGTAACGGCTCACCAAGGCGACGATACATAGCCGACCTGAGAGGGTGATCGGCCACACTGGGACTGAGACACGGCCCAG	0	510	0	0	0	0	0	0	0	0	0	0	0	0	0	0	0	0	0	0	0	0	0	0	0	0	0	0	0	0	0	0	0	0	0	0	0	0	0	0	0	0	0	0	0	0	0	0
804	GACGAACGCTGGCGGCGTGCTTAACACATGCAAGTCGAGCGGTAAGGCCTCTTCGGGGGTACACGAGCGGCGAACGGGTGAGTAACACGTGGGCAACCTGCCCTCAGCTCTGGGATAAGCCTGGGAAACTGGGTCTAATACCGGATATGACCTGGCCTCGCATGGGGTTGGGTGGAAAGTTTTTTCGGCTGGGGATGGGCCCGCGGCCTATCAGCTTGTTGGTGGGGTGATGGCCTACCAAGGCGACGACGGGTAGCCGGCCTGAGAGGGCGACCGGCCACACTGGGACTGAGATACGGCCCAG	0	0	0	0	0	0	0	0	0	0	0	0	0	0	0	0	0	0	0	0	0	0	0	0	0	0	0	0	0	0	0	0	0	0	0	0	0	0	0	0	0	0	0	0	0	0	0	0
805	ATTGAACGCTGGCGGAACGCTTTACACATGCAAGTCGAACGGTAACGTGGGGAGGAGCTTGCTCCACCCCGACGACGAGTGGCGAACGGGTGAGTAATACATCGGAACGTGTCCGCTCGTGGGGGACAACCAGCCGAAAGGTTGGCTAATACCGCATGAGTTCTACGGAAGAAAGAGGGGGACCCGCAAGGGCCTCTCGCGAGCGGAGCGGCCGATGACTGATTAGCCGGTTGGTGAGGTAACGGCTCACCAAAGCAACGATCAGTAGCTGGTCTGAGAGGACGACCAGCCACACTGGGACTGAGACACGGCCCAG	0	0	0	0	0	0	0	0	0	0	0	0	0	0	0	0	0	0	0	0	0	0	0	0	0	12	0	0	0	0	0	0	0	0	0	0	0	0	0	0	0	0	0	0	0	0	0	0
806	ATTGAACGCTGGCGGCATGCCTTACACATGCAAGTCGAACGGCAGCACGGGGGGGCAACCCCTGGTGGCGAGTGGCGAACGGGTGAGTAATATATCGGAACGTACCCTGTAGCGGGGGATAACGCGTCGAAAGATGTGCTAATACCGCATACGACCTACGGGTGAAAGCGGAGGACCGCAAGGCTTCGCACTATAGGAGCGGCCGATATCGGATTAGCTAGTTGGCGGGGTAACGGCCCACCAAGGCGACGATCCGTAGCTGGTCTGAGAGGACGATCAGCCACACTGGAACTGAGACACGGTCCAG	0	0	0	0	0	0	0	0	0	0	0	0	0	0	0	0	0	0	0	0	0	0	0	0	0	0	0	0	0	0	0	0	0	0	0	8	0	6	0	0	0	0	0	0	0	0	0	0
808	GACGAACGCTGGCGGCGTGCCTAATACATGCAAGTAGAACGCTGAAGAGAGGAGCTTGCTCTTCTTGGATGAGTTGCGAACGGGTGAGTAACGCGTAGGTAACCTGCCTGGTAGCGGGGGATAACTATTGGAAATGATAGCTAATACCGCATAAAATGGATTATCGCATGATAATCCATTGAAAGGTGCAAATGCATCACTACCAGATGGACCTGCGTTGTATTAGCTAGTTGGTGGGGTAACGGCTCACCAAGGCGACGATACATAGCCGACCTGAGAGGGTGATCGGCCACACTGGGACTGAGACACGGCCCAG	0	0	0	0	0	0	0	0	0	0	0	0	0	0	0	0	0	0	0	0	0	0	0	0	0	0	0	0	0	0	0	0	0	0	0	0	0	0	0	0	0	0	0	0	0	0	0	0
809	GATGAACGCTGGCGGCGTGCCTAATACATGCAAGTCGAGCGAACGGATGAGAAGCTTGCTTCTCTGATGTTAGCGGCGGACGGGTGAGTAACACGTGGATAACCTACCTATAAGACTGGGATAACTTCGGGAAACCGGAGCTAATACCGGATAATATTTTGAACCGCATGGTTCAAAAGTGAAAGACGGTCTTGCTGTCACTTATAGATGGATCCGCGCTGCATTAGCTAGTTGGTAAGGTAACGGCTTACCAAGGCAACGATGCATAGCCGACCTGAGAGGGTGATCGGCCACACTGGAACTGAGACACGGTCCAG	0	0	0	0	0	0	0	0	0	0	0	0	0	0	0	0	0	0	0	0	0	0	0	0	0	0	0	0	0	0	0	0	0	0	0	0	0	0	0	0	0	0	0	0	0	0	32	0
810	GATGAACGCTAGCGGCAGGCTTAACACATGCAAGTCGGATGCGACCGGGCTTCGGTTCGGGAGCATGGCGGATGGGTGAGTAACACGTATGCAACCTGCCCCGCACCTGGGGATACGCCGGCACATCGCCGAATAAACCCCAGCGGTGCGCCCGGGCCGCCTGGCCTGGGCGTGATAGGCCTTCGGGCTGGTGCGGGATGGGCATGCGGGCCATTAGCTAGTAGGCGGGGCAACGGCCCACCTAGGCGATGATGGCTAGGGGTCCTGAGAGGGAGGCCCCCCACACTGGGACTGAGACACGGCCCAG	0	0	0	0	0	0	0	0	0	0	0	0	0	0	0	0	0	0	0	0	0	0	0	0	0	0	0	0	0	0	0	0	0	0	0	0	0	0	0	0	0	0	0	0	0	0	0	0
811	GACGAACGCTGGCGGCGTGCCTAACACATGCAAGTCGAACGGAACTGTTTTGAAAGATTTCTTCGGAATGAATTTAATTTAGTTTAGTGGCGGACGGGTGAGTAACGCGTGAGTAACCTGCCTTCAAGAGGGGGATAACATTCTGAAAAGAATGCTAATACCGCATGACATATCGGAACCACATGGTTTTGATATCAAAGATTTTATCGCTTGAAGATGGACTCGCGTCCGATTAGTTAGTTGGTGAGGTAACGGCTCACCAAGACCGCGATCGGTAGCCGGACTGAGAGGTTGAACGGCCACATTGGGACTGAGACACGGCCCAG	0	0	0	0	0	0	0	0	0	0	0	0	0	0	0	0	0	0	0	0	0	0	0	0	0	0	0	0	0	0	0	0	0	0	0	0	0	0	0	0	0	0	0	0	0	0	0	0
812	GATGAACGCTGGCGGCGTGCTTAACACATGCAAGTCGAACGATTAACCCACCTTCGGGTGGTCATAGAGTGGCGAACGGGTGAGTAACACGTGACCAACCTGCCTCATGCATCGGGATAACTGCTGGAAACGGCAGCTAATACCGGATACTCTTGCAACTTCGCATGGAGATGCAAGGAAAGCTTTCGCGGCATGAGATGGGGTCGCGGCCCATTAGGTAGACGGTGAGGTAGTGGCTCACCGTGCCTGCGATGGGTAGCCGGACTGAGAGGTCGATCGGCCACATTGGGACTGAGATACGGCCCAG	0	0	0	0	0	0	0	0	0	0	0	0	0	0	0	0	0	0	0	0	0	0	0	0	0	0	0	509	0	0	0	0	0	0	0	0	0	0	0	0	0	0	0	0	0	0	0	0
813	GACGAACGCTGGCGGCGTGCTTAACACATGCAAGTCGAACGATGAACTGGAGCTTGCTCCAGGAATTAGTGGCGAACGGGTGAGTAACACGTGAGTAACCTGCCCTTGACTCTGGGATAAGCGCTGGAAACGGTGTCTAATACCGGATACGAGCTTCAGCCGCATGGCTAGGAGTTGGAAAGAATTTCGGTCAAGGATGGACTCGCGGCCTATCAGCTAGTTGGTGAGGTAATGGCTCACCAAGGCGACGACGGGTAGCCGGCCTGAGAGGGTGACCGGCCACACTGGGACTGAGACACGGCCCAG	0	0	0	0	0	0	0	0	0	0	0	0	0	0	0	544	0	0	0	0	0	0	0	0	0	0	0	0	0	0	0	0	0	0	0	0	0	0	0	0	0	0	0	0	0	0	0	0
814	GATGAACGCTAGCTACAGGCTTAACACATGCAAGTCGAGGGGAAACGACATTGAAGCTTGCTTCGATGGGCGTCGACCGGCGCACGGGTGAGTAACGCGTATCCAACCTGCCTCTGACTAAGGGATAACCCGGCGAAAGTCGGACTAATACCTTATGAGGTTTTCAGCAGACATCTAATGAAAACGAAAGATTTATCGGTCAGCGATGGGGATGCGTCTGATTAGCTTGTTGGCGGGGTAACGGCCCACCAAGGCAACGATCAGTAGGGGTTCTGAGAGGAAGGTCCCCCACATTGGAACTGAGACACGGTCCAA	0	0	0	0	0	0	0	0	0	0	0	0	0	0	0	0	0	0	0	0	0	0	0	0	0	0	0	0	0	0	0	0	0	0	0	0	0	0	0	0	0	0	0	0	0	0	0	0
815	GATGAACGCTAGCTACAGGCTTAACACATGCAAGTCGAGGGGAAACGACATCGAAAGCTTGCTTTTGATGGGCGTCGACCGGCGCACGGGTGAGTAACGCGTATCCAACCTGCCCGCCACTTGGGGATAACCTTGCGAAAGTAAGACTAATACCCAATGATATCTCTAGAAGACATCTGAAAGAGATTAAAGATTTATCGGTGATGGATGGGGATGCGTCTGATTAGCTTGTTGGCGGGGTAACGGCCCACCAAGGCAACGATCAGTAGGGGTTCTGAGAGGAAGGTCCCCCACATTGGAACTGAGACACGGTCCAA	0	0	0	0	0	0	0	0	0	0	0	0	0	0	0	0	0	0	0	0	0	0	0	0	0	0	0	0	0	0	0	0	0	0	0	0	0	0	0	0	0	0	0	0	0	0	0	0
816	GATGAACGCTGACAGAATGCTTAACACATGCAAGTCTTTGGCAAATCTGTGCTTGCACAGCCTAGCCAAGGCGGACGGGTGAGTAACGCGTAAAGAACTTGCCCTGCAGACAGGGATAACAGACGGAAACGACTGATAATACCTGATACAATTGCTAGCACGCATGTGCCCGGCAATGAAAAGTGATGCTGCAGGAGAGCTTTGCGTCCTATTAGCTTGTTGGTGAGGTAACGGCTCACCAAGGCGATGATAGGTAGCCGGCCTGAGAGGGTGAACGGCCACAAGGGGACTGAGATACGGCCCTT	0	0	0	0	0	0	0	0	0	0	0	0	0	0	0	0	0	0	0	0	0	0	0	0	0	0	0	0	0	0	0	0	0	0	0	0	0	0	0	0	0	0	0	0	0	0	0	0
817	ATTGAACGCTGGCGGCATGCCTTACACATGCAAGTCGAACGGCAGCACGGGAGCAATCCTGGTGGCGAGTGGCGAACGGGTGAGTAATACATCGGAACGTGCCCTGTAGTGGGGGATAACTAGTCGAAAGACTAGCTAATACCGCATACGACCTGAGGGTGAAAGTGGGGGACCGCAAGGCCTCATGCTATAGGAGCGGCCGATGTCTGATTAGCTAGTTGGTGGGGTAAAGGCCTACCAAGGCGACGATCAGTAGCTGGTCTGAGAGGACGATCAGCCACACGGGGACTGAGACACGGCCCAG	0	0	0	0	0	0	0	0	0	0	0	0	0	0	0	0	0	0	0	0	0	0	0	0	0	0	0	0	0	0	0	0	0	0	0	0	0	0	0	0	0	0	0	0	0	0	0	0
818	GATGAACGCTGGCGGCGTGCCTAATACATGCAAGTAGAACGCTGAAGCTTGGTGCTTGCACCGAGCGGATGAGTTGCGAACGGGTGAGTAACGCGTAGGTAACCTGCCTCTTAGCGGGGGATAACTATTGGAAACGATAGCTAATACCGCATAAAAGTCGATATCGCATGATATTGACTTGAAAGGTGCAATTGCATCACTAAGAGATGGACCTGCGTTGTATTAGCTAGTTGGTGAGGTAACGGCTCACCAAGGCGACGATACATAGCCGACCTGAGAGGGTGATCGGCCACACTGGGACTGAGACACGGCCCAG	0	0	0	0	0	0	0	0	0	0	0	0	0	0	0	0	0	0	0	0	0	0	0	0	0	0	0	0	0	0	0	0	0	0	0	0	0	0	0	0	0	0	0	0	0	0	0	0
819	GATGAACGCTAGCTACAGGCTTAACACATGCAAGTCGAGGGGCAGCATTTTAGTTTGCTTGCAAACTGAAGATGGCGACCGGCGCACGGGTGAGTAACACGTATCCAACCTGCCGATAACTCCGGAATAGCCTTTCGAAAGAAAGATTAATACCGGATGGCATACGAATATCGCATGATATTTTTATTAAAGAATTTCGGTTATCGATGGGGATGCGTTCCATTAGTTTGTTGGCGGGGTAACGGCCCACCAAGACTACGATGGATAGGGGTTCTGAGAGGAAGGTCCCCCACATTGGAACTGAGACACGGTCCAA	0	0	0	0	0	0	0	0	0	0	0	0	0	0	0	0	0	0	0	0	0	0	0	0	0	0	0	0	0	0	0	0	0	0	0	0	0	0	0	0	0	0	0	0	0	0	0	0
820	ATTGAACGCTGGCGGCAGGCCTAACACATGCAAGTCGAACGGTAACAGGAAACAGCTTGCTGTTTCGCTGACGAGTGGCGGACGGGTGAGTAATGTCTGGGAAACTGCCTGATGGAGGGGGATAACTACTGGAAACGGTAGCTAATACCGCATAACGTCGCAAGACCAAAGAGGGGGACCTTAGGGCCTCTTGCCATCGGATGTGCCCAGATGGGATTAGCTAGTAGGTGGGGTAAAGGCTCACCTAGGCGACGATCCCTAGCTGGTCTGAGAGGATGACCAGCCACACTGGAACTGAGACACGGTCCAG	0	0	0	0	0	0	0	0	0	0	0	0	0	0	0	0	0	0	0	0	0	0	0	0	0	0	0	0	0	0	0	0	0	0	0	0	0	0	0	0	0	0	0	0	0	0	0	0
821	GATGAACGCTAGCGGGAGGCCTAACACATGCAAGCCGAGCGGTATTGTTTCTTCGGAAATGAGAGAGCGGCGTACGGGTGCGGAACACGTGTGCAACCTGCCTTTATCTGGGGGATAGCCTTTCGAAAGGAAGATTAATACTCCATAACATATTGATTGGCATCAATTAATATTGAAAGCTCCGGCGGATAGAGATGGGCACGCGCAAGATTAGCTAGTTGGTGAGGTAACGGCTCACCAAGGCGATGATCTTTAGGGGGCCTGAGAGGGTGATCCCCCACACTGGTACTGAGACACGGACCAG	0	0	0	0	0	0	0	0	0	0	0	0	0	0	0	0	0	0	0	0	0	0	0	0	0	0	55	0	0	0	0	0	0	0	0	0	0	0	0	224	0	0	0	0	0	0	0	0
822	ATTGAACGCTGGCGGCAGGCCTAACACATGCAAGTCGAACGGTAGCACAGAGAGCTTGCTCTCGGGTGACGAGTGGCGGACGGGTGAGTAATGTCTGGGAAACTGCCTGATGGAGGGGGGTAACTACTGGAAACGGTAGCTAATACCGCATAACGTCGCAAGACCAAAGAGGGGGACCTTCGGGCCTCTTGCCATCAGATGTGCCCAGATGGGATTAGCTAGTAGGTGGGGTAACGGCTCACCTAGGCGACGATCCCTAGCTGGTCTGAGAGGATGACCAGCCACACTGGAACTGAGACACGGTCCAG	0	0	0	0	0	0	0	0	0	0	0	0	0	0	0	0	0	0	0	0	0	0	0	0	0	0	0	0	0	0	0	0	0	0	0	0	0	0	0	0	0	0	0	0	0	0	0	0
823	ATTGAACGCTGGCGGCATGCTTTACACATGCAAGTCGAACGGCAGCGAAGAGAAGCTTGCTTCTCTGTCGGCGAGTGGCGAACGGGTGAGTATAGCATCGGAACGTGCCAAGTAGTGGGGGATAACCAAGCGAAAGTTTGGCTAATACCGCGTAAGCTCTAAGGAGGAAAGTAGGGGACCGCAAGGCCTTACGCTATTTGATCGGCCGATGTCGGATTAGCTAGTTGGTGAGGTAATGGCTCACCAAGGCGATGATCCGTAGCGGGTCTGAGAGGACGATCCGCCACACTGGGACTGAGACACGGCCCAG	0	0	0	0	0	0	0	0	0	0	0	0	0	0	0	0	0	0	0	0	0	0	0	0	0	0	0	0	0	0	0	0	0	0	0	0	0	0	0	0	0	0	0	0	0	0	0	0
824	GATGAACGCTAGCTACAGGCTTAACACATGCAAGTCGCAGGGTAACGTGAGGGAAGCTTGCTTTCCTTGACGACGACTGGCGCACGGGTGAGTAACGCGTATCCAACCTTCCCATGACCACGGGATAACCCGTTGAAAGACGGCCTAATACCGTATGACGTCGTTTGCCGACATCGAAAGACGACCAAAGGTTTGGCGGTGATGGATGGGGATGCGTCTGATTAGCTTGTTGGCGGGGTAACGGCCCACCAAGGCGACGATCAGTAGGGGTTCTGAGAGGAAGGTCCCCCACATTGGAACTGAGACACGGTCCAA	0	0	0	0	0	0	0	0	0	0	0	0	0	0	0	0	63	0	0	0	0	0	0	0	0	0	0	0	0	0	0	0	0	0	0	0	0	0	0	0	0	0	0	0	0	0	0	0
825	GATGAACGCTGACAGAATGCTTAACACATGCAAGTCTACTTGAACTTCGGTTTGGGTGGCGGACGGGTGAGTAACGCGTAAAGAACTTGCCTCACAGTTAGGGACAACATTTGGAAACGAATGCTAATACCTGATATTATGATTTTAGGGCATCCTAAGATTATGAAAGCTATATGCGCTGTGAGAGAGCTTTGCGTCCCATTAGCTAGTTGGAGAGGTAACGGCTCACCAAGGCGATGATGGGTAGCCGGCCTGAGAGGGTGAACGGCCACAAGGGGACTGAGACACGGCCCTT	0	0	0	0	0	0	0	0	0	0	70	0	0	0	0	0	0	0	0	114	0	0	0	0	0	36	0	0	0	0	0	0	0	0	0	0	0	0	0	0	0	0	0	0	0	0	0	0
826	GATGAACGCTAGCGGCAGGCCTAACACATGCAAGTCGAGGGGCATCACGAGGTAGCAATACTTTGGTGGCGACCGGCGCACGGGTGCGTAACGCGTATGTAACCTACCTATAACAGGGGCATAACACTGAGAAATTGGTACTAATTCCCCATAATATTCGGAGAGGCATCTCTCCGGGTTGAAAACTCCGGTGGTTATAGATGGACATGCGTTGTATTAGCTAGTTGGTGAGGTAACGGCTCACCAAGGCAACGATACATAGGGGGACTGAGAGGTTAACCCCCCCACACTGGTACTGAGACACGGACCAG	0	0	0	0	0	0	0	0	0	0	0	0	0	0	0	0	0	0	0	0	0	0	0	0	0	0	0	0	0	0	0	0	0	0	0	0	0	0	0	0	0	0	0	0	0	0	0	0
827	GATTAACGCTGGCGGCGTGCATAACACATGCAAGTCGAACGATGAAACTTAATTGATCTCTTCGGAGTGATTTTAAGTGGATTAGTGGCGGACGGGTGAGTAACGCGTGAGTAACCTGCCTTAGAGATGGGGATAGCCTCTGGAAACGGAGAATAATACCCAATGATACTAAGCTATCGCATGGTAGCCTAGTCAAAGATTTATCGCTCTAAGATGGACTTGCGTCTGATTAGCTAGTTGGTGAGATAATGGCTCACCAAGGCGACGATCAGTAGCCGGCTTGAGAGAGTGTACGGCCACATTGGGACTGAGACACGGCCCAG	0	0	0	0	0	0	0	0	0	0	0	0	0	0	0	0	0	0	0	0	0	0	0	0	0	0	0	0	0	0	0	0	0	0	0	0	0	0	0	0	0	0	0	0	0	0	0	0
828	GACGAACGCTGGCGGCGTGCTTAACACATGCAAGTCGAGCGGTAAGGCCCTTCGGGGTACACGAGCGGCGAACGGGTGAGTAACACGTGAGCAATCTGCCCTTCACTCTGGGATAACCCCCGGAAACGGGAGCTAATACCGGATATGACCACTACACGCATGTGTTGGTGGTGGAAAGTTCTGGCGGTGGAGGATGAGCTCGCGGCCTATCAGCTTGTTGGTGGGGTAATGGCCCACCAAGGCTTCGACGGGTAGCCGGCCTGAGAGGGTGACCGGCCACACTGGGACTGAGACACGGCCCAG	0	0	0	0	0	0	0	0	0	0	0	0	0	0	0	0	0	0	0	0	0	0	0	0	0	0	0	0	0	0	0	0	0	0	0	0	0	0	0	0	0	0	0	0	0	0	0	0
829	GACGAACGCTGGCGGCGTGCTTAACACATGCAAGTCGAACGGTGAAGCTCCAGCTTGCTGGGGTGGATGAGTGGCGAACGGGTGAGTAACACGTGAGTAACCTGCCCCCTTCTTCTGGATAACTGCTTGAAAGGGTAGCTAATACGGGATATTCTGGCCTGCTCGCATGGGTGGGTTTGGAAAGGTTTTTTCTGGTGGGGGATGGGCTCGCGGCCTATCAGCTTGTTGGTGGGGTGATGGCCTACCAAGGCGGTGACGGGTAGCCGGCCTGAGAGGGTGGACGGCCACACTGGGACTGAGACACGGCCCAG	0	0	0	0	0	0	0	0	0	0	0	0	0	0	0	0	0	0	0	0	0	0	0	0	0	0	0	0	0	0	0	0	0	0	0	0	0	0	0	0	0	0	0	0	0	0	0	0
830	AACGAACGCTGGCGGCATGCTTAACACATGCAAGTCGAACGGTTTATGGGGTTTTACTTCATAGATAGTGGCAGACGGGTGAGTAACGCGTGGGAATGTACCCCTTGGTTCGGAATAACGTTTGGAAACGGACGCTAATACTGGATAAGTCCGAAAGGAGAAAGATAAATTGCCGAGGGAGCGGCCCGCGTTAGATTAGGTAGTTGGTGAGGTAAAGGCTCACCAAGCCGATGATCTATAGCTGGTCTGAGAGGATGATCAGCCACACTGGGACTGAGACACGGCCCAG	0	0	0	0	0	0	0	0	0	0	0	0	0	0	0	0	0	0	0	0	0	0	0	0	0	0	0	0	0	0	0	0	0	0	0	0	0	0	0	0	0	0	0	0	0	0	0	0
831	GATGAACGCTGGCGGCGTGCCTAATACATGCAAGTCGAGCGAATGGATTAAGAGCTTGCTCTTATGAAGTTAGCGGCGGACGGGTGAGTAACACGTGGGTAACCTGCCCATAAGACTGGGATAACTCCGGGAAACCGGGGCTAATACCGGATAATATTTTGAACTGCATGGTTCGGAATTGAAAGGCGGCTTCGGCTGTCACTTATGGATGGACCCGCGTCGCATTAGCTAGTTGGTGAGGTAACGGCTCACCAAGGCAACGATGCGTAGCCGACCTGAGAGGGTGATCGGCCACACTGGGACTGAGACACGGCCCAG	0	0	0	0	0	0	0	0	0	0	0	0	0	0	0	0	0	0	0	0	0	0	0	0	0	0	0	0	0	0	0	0	0	0	0	0	0	0	0	0	0	0	0	0	0	0	0	0
832	GATTAACGCTGGCGGCATGCCTTACACATGCAAGTCGAACGGCAGCACGGGAGCAATCCTGGTGGCGAGTGGCGAACGGGTGAGTAATACATCGGAACGTGCCCTGTAGTGGGGGATAACTAGTCGAAAGACTAGCTAATACCGCATACGACCTGAGGGTGAAAGTGGGGGACCGCAAGGCCTCATGCTATAGGAGCGGCCGATGTCTGATTAGCTAGTTGGTGGGGTAAAGGCCTACCAAGGCGACGATCAGTAGCTGGTCTGAGAGGACGATCAGCCACACTGGGACTGAGACACGGCCCAG	0	0	0	0	0	0	0	0	0	0	0	0	0	0	0	0	0	0	0	0	0	0	0	0	0	0	0	0	0	0	0	0	0	0	0	0	0	0	0	0	0	0	0	0	0	0	0	0
833	GATGAACGCTAGCGGCAGGCTTAATACATGCAAGTCGTGGGGCAGCGCAGTGTAGCAATACATGGGCGGCGACCGGCAAACGGGTGCGGAACACGTACACAACCTTCCTACAAGTGGGGAATAGCCCAGAGAAATTTGGATTAATACCCCGTAACATATAAAGATGGCATCATTTTTATATTATAGCTACGGCGCTTGTTGATGGGTGTGCGGCTGATTAGGTAGTTGGCGGGGTAATGGCCCACCAAGCCTGCGATCAGTAGCTGATGTGAGAGCATGATCAGCCACACGGGCACTGAGACACGGGCCCG	0	0	0	0	0	0	0	0	0	0	0	0	0	0	0	0	0	0	0	0	0	0	0	0	0	0	0	0	0	0	0	0	0	0	0	0	0	0	0	0	0	0	0	0	0	0	0	0
834	GATGAACGCTAGCGACAGGCTTAACACATGCAAGTCGAGGGGCAGCACAGGTAGCAATACCGGGTGGCGACCGGCGCACGGGTGAGTAACGCGTATGCAACTTGCCTATCAGAGGGGGATAACCCGGCGAAAGTCGGACTAATACCGCATGAAGCAGGGGCCCCGCATGGGGATATTTGCTAAAGATTCATCGCTGATAGATAGGCATGCGTTCCATTAGGCAGTTGGCGGGGTAACGGCCCACCAAACCGACGATGGATAGGGGTTCTGAGAGGAAGGTCCCCCACATTGGTACTGAGACACGGACCAA	0	0	0	0	0	0	0	0	0	0	0	0	0	0	0	0	0	0	0	0	0	0	0	0	0	0	0	0	0	0	0	0	0	0	0	0	0	0	0	0	0	0	0	0	0	0	0	0
835	ATTGAACGCTGGCGGCATGCCTTACACATGCAAGTCGAACGGCAGCATGATCTAGCTTGCTAGATTGATGGCGAGTGGCGAACGGGTGAGTAATACATCGGAACGTGCACTGTAGTGGGGGATAACTAGTCGAAAGATTAGCTAATACCGCATACGACCTGAGGGTGAAAGTGGGGGACCGCAAGGCCTCATGCTATAGGAGCGGCCGATGTCTGATTAGCTAGTTGGTGAGGTAAAGGCTCACCAAGGCGACGATCAGTAGCTGGTCTGAGAGGACGATCAGCCACACTGGGACTGAGACACGGCCCAG	0	0	0	0	0	0	0	0	0	0	0	0	0	0	0	0	0	0	0	0	0	0	0	0	0	0	0	0	0	0	0	0	0	0	0	0	0	0	0	0	0	0	0	0	0	0	0	0
836	AACTAACGCTGGCGGCGCGTCTTAAACATGCAAGTCGAGCGGGGTAGCAATACCTAGCGGCGAACGGGTGAGTAACACGTGGGTAATCTTCCTCCGAGTCTGGGATAACTTTCCGAAAGGAAAGCTAATACCGGATAGTCCTACTGGATCACAGGATCTGATAGGTAAAGATTTATTGCTTGGAGATGAGCCCGCGGCCGATTAGCTAGTTGGTGAGGTAAAGGCTCACCAAGGCGACGATCGGTAGCCGGCCTGAGAGGGTGTCCGGCCACAATGGAACTGAGACACGGTCCAT	0	0	0	0	0	0	0	0	0	0	0	0	0	0	0	0	0	0	0	0	0	0	0	0	0	0	0	0	0	0	0	0	0	0	0	0	0	0	0	0	0	0	0	0	0	0	0	0
837	GACGAACGCTGGCGGCGTGCTTAACACATGCAAGTCGAACGGGATTTAGTAGACAGAAACCTCGGTGGAAGATTACTAATGAGAGTGGCGAACGGGTGAGTAACGCGTGAGCAACCTGCCTATGACAGTGGGATAGCCTCGGGAAACCGGGATTAATACCGCATAAAATCGTGGAAACACATGTTTCAACGGTCAAAGATTTATCGGTCATAGATGGGCTCGCGTCTGATTAGCTAGTTGGTGAGATAACAGCCCACCAAGGCGACGATCAGTAGCCGGTCTGAGAGGATGAACGGCCACATTGGAACTGAGACACGGTCCAA	0	0	0	0	0	0	0	0	0	0	0	0	0	0	0	0	0	0	0	0	0	0	0	0	0	0	0	0	0	0	0	0	0	0	0	0	0	0	0	0	0	0	0	0	0	0	0	0
838	GACGAACGCTGGCGGCGTGCTTAACACATGCAAGTCGAACGGAAAGGCCTGTCCTTCCTTGTGTTGGACGGGTACTCGAGTGGCGAACGGGTGAGTAACACGTGAGTGATCTGCCCCCAACTTGGGTATAAGCCTGGGAAACTGGGTCTAATTCCCGATAGGACTGCAGGGTGGTGCCTGTGGTGGAAAACGATTTTCTAGTGGTTGGGGATGAGCTCGCGGCCTATCAGCTTGTTGGTGGGGTAATGGCCTACCAAGGCGGCGACGGGTAGCCGGCCTGAGAGGGTGGACGGCCACATTGGGACTGAGATACGGCCCAG	0	0	0	0	0	0	0	0	0	0	0	0	0	0	0	0	0	0	0	0	0	0	17	0	0	0	0	0	0	0	0	0	0	0	0	0	0	0	0	0	0	0	0	3	0	0	0	0
839	GACGAACGCTGGCGGCGTGCTTAACACATGCAAGTCGAACGGAAAGGCCTCAGCTTGCTGGGGTACTCGAGTGGCGAACGGGTGAGTAACACGTGGGTGATCTGCCTTGCACTTCGGGATAAGCTTGGGAAACTGGGTCTAATACCGGATAGGACAGCTGTTTAGTGTCAGTTGTGGAAAGTTTTTTCGGTGCAAGATGAGCTCGCGGCCTATCAGCTTGTTGGTGGGGTAATGGCCTACCAAGGCGTCGACGGGTAGTCGGCCTGAGAGGGTGGACGGCCACATTGGGACTGAGATACGGCCCAG	0	0	0	0	0	0	0	0	0	0	0	0	0	0	0	0	0	0	0	0	0	0	0	0	0	0	0	0	0	0	0	0	0	0	0	0	0	0	0	0	0	0	0	0	0	0	0	0
840	GACGAACGCTGGCGGCGCGCCTAACACATGCAAGTCGAACGAGCGAGAGAGAGCTTGCTTTCTCGAGCGAGTGGCGAACGGGTGAGTAACGCGTGAGGAACCTGCCTCAAAGAGGGGGACAACAGTTGGAAACGACTGCTAATACCGCATAAGCCCACGGGTCGGCATCGACCAGAGGGAAAAGGAGCAATCCGCTTTGAGATGGCCTCGCGTCCGATTAGCTAGTTGGTGAGGTAACGGCCCACCAAGGCAACGATCGGTAGCCGGACTGAGAGGTTGAACGGCCACATTGGGACTGAGACACGGCCCAG	0	0	0	0	0	0	0	0	0	0	0	0	0	0	0	0	0	0	0	59	0	0	0	0	0	0	0	0	0	0	0	0	0	0	0	0	0	0	7	45	0	0	0	0	0	0	0	0
841	GATTAACGCTGGCGGCGTGCATAACACATGCAAGTCGAACGATGAAGCTTTTTTGATTTCTTCGGAATGATTAAAAGTGGATTAGTGGCGGACGGGTGAGTAACGCGTGAGTAACCTGCCTTAGAGAAGGGGATAGCCTTTGGAAACGAAGAATAATACCCTATGAAACCATAACCTCGCATGAGGCCTTGGTCAAAGATTTATCGCTCTAAGATGGACTTGCGTCTGATTAGTTAGTTGGTGGGGTAACGGCCTACCAAGACAGCGATCAGTAGCCGGCTTGAGAGAGTGTACGGCCACATTGGGACTGAGACACGGCCCAG	0	0	0	0	0	0	353	0	0	0	0	0	0	0	0	0	0	0	0	0	0	0	0	0	0	0	0	0	0	0	0	0	0	0	0	0	0	0	0	0	0	0	0	0	0	0	0	0
842	GATGAACGCTGGCGGCGTGCTTAACACATGCAAGTCGAACGGAAAGGCCTCTGCTTGCAGGGGTACTCGAGTGGCGAACGGGTGAGTAACACGTGGGTGATCTGCCCTGCACTTCGGGATAAGCCTGGGAAACTGGGTCTAATACCGGATAGGACCACATTTTGGATGGTGTGGTGGAAAGTTTTTCGGTGTGGGATGAGCTCGCGGCCTATCAGCTTGTTGGTGGGGTAATGGCCTACCAAGGCGTCGACGGGTAGCCGGCCTGAGAGGGTGTACGGCCACATTGGGACTGAGATACGGCCCAG	0	0	0	0	0	0	0	0	0	0	0	0	0	0	0	0	0	0	0	0	0	0	0	0	0	0	0	0	0	0	0	0	0	0	0	0	0	0	0	0	0	0	0	0	0	0	0	0
843	ATTGAACGCTGGCGGCAGGCCTAACACATGCAAGTCGAGCGGTAGCACAGAGAGCTTGCTCTCGGGTGACGAGCGGCGGACGGGTGAGTAATGTCTGGGAAACTGCCTGATGGAGGGGGATAACTACTGGAAACGGTAGCTAATACCGCATAATGTCGCAAGACCAAAGTGGGGGACCTTCGGGCCTCATGCCATCAGATGTGCCCAGATGGGATTAGCTGGTAGGTGGGGTAACGGCTCACCTAGGCGACGATCCCTAGCTGGTCTGAGAGGATGACCAGCCACACTGGAACTGAGACACGGTCCAG	0	0	0	0	0	0	0	0	0	0	0	0	0	0	0	0	0	0	0	0	0	0	0	0	0	0	0	0	0	0	0	0	0	0	0	0	0	0	0	0	0	0	0	0	0	0	0	0
844	GACGAACGCTGGCGGCGTGCCTAATACATGCAAGTCGAACGAGAGCGACCGGTGCTTGCACTGGTCAATCTAGTGGCGAACGGGTGAGTAACACGTGGGTAACCTGCCCATCAGAGGGGGATAACATCCGGAAACGGATGCTAAAACCGCATAGGTCTTCGAGCCGCATGGCTTGAAGAGGAAAAGAGGCGCAAGCTTCTGCTGATGGATGGACCCGCGGTGCATTAGCTAGTTGGTGAGGTAACGGCTCACCAAGGCCGTGATGCATAGCCGACCTGAGAGGGTGATCGGCCACATTGGGACTGAGACACGGCCCAA	0	0	0	0	0	0	0	0	0	0	0	0	0	0	0	0	0	0	0	93	0	0	0	0	0	64	0	0	0	0	0	0	0	0	0	0	0	0	0	0	0	0	0	0	0	0	0	0
845	GGTTAACGCTGGCGGCGTGCCTAACACATGCAAGTCGAGCGAGGGCTCGTCTCCCGCAAGGGAGGCGGGTTCCTAGCGGCAAACGGGTGAGTAACACGTGGGCAACCTGTCCTCTCGCGGGGGATAACACCGAGAAATCGGTGCTAATACCGCACGTTGTCGTCGGAGGCATCTTCGGCGAAGAAAGCAGCAATGCGCGAGTGGGTGGGCCCGCGGCCTATCAGCTAGTCGGTGGGGTAACGGCCTACCGAGGCTTTGACGGGTAGCTGGTCTGAGAGGACGACCAGCCACACGGGGACTGAGACACGGCCCCG	0	0	0	0	0	0	0	0	0	0	0	0	0	0	0	0	0	0	0	0	0	0	0	0	0	0	0	0	0	0	0	0	0	0	0	0	0	0	0	0	0	0	0	0	0	0	0	0
846	GATGAACGCTAGCTACAGGCTTAACACATGCAAGTCGAGGGGAAACGGCATTGAGTGCTTGCACTCTTTGGACGTCGACCGGCGCACGGGCGAGTAACGCGTATCCAACCTTCCCATTACTGTGGGATAACCTGCCGAAAGGCAGACTAATACCGCATAGTCTTCGATGACGGCATCAGATTTGAAGTAAAGATTTATCGGTAATGGATGGGGATGCGTCTGATTAGCTTGTTGGCGGGGTAACGGCCCACCAAGGCGACGATCAGTAGGGGTTCTGAGAGGAAGGTCCCCCACATTGGAACTGAGACACGGTCCAA	0	0	0	0	0	0	0	0	0	0	0	0	0	0	0	0	0	0	0	0	0	0	0	0	0	0	0	0	0	0	0	0	0	0	0	0	0	0	0	0	0	0	0	0	0	0	0	0
847	GATGAACGCTAGCGACAGGCTTAACACATGCAAGTCGAGGGGCAGCATGATTTGTAGCAATACAGATTGATGGCGACCGGCGCACGGGTGAGTAACGCGTATGCAACTTACCTATCAGAGGGGGATAGCCCGGCGAAAGTCGGATTAATACCCCATAAAACAGGGGTCCCGCATGGGAATATTTGTTAAAGATTCATCGCTGATAGATAGGCATGCGTTCCATTAGGCAGTTGGCGGGGTAACGGCCCACCAAACCGACGATGGATAGGGGTTCTGAGAGGAAGGTCCCCCACATTGGTACTGAGACACGGACCAA	0	0	0	0	0	0	0	0	0	0	0	0	0	0	0	0	0	0	0	53	0	0	0	0	0	44	0	0	0	0	0	0	0	0	13	0	0	0	0	0	0	0	0	0	0	0	0	0
848	GATGAACGCTAGCGACAGGCTTAACACATGCAAGTCGAGGGGCAGCGGGGGTAGCGATACCCGCCGGCGACCGGCGCACGGGTGAGTAACGCGTATGCAACTTGCCTATCAGAGGGGGATAACCCGGCGAAAGTCGGACTAATACCGCATGAAGCAGGGATCCCGCATGGGAATATTTGCTAAAGATTCATCGCTGATAGATAGGCATGCGTTCCATTAGGCAGTTGGCGGGGTAACGGCCCACCAAACCGACGATGGATAGGGGTTCTGAGAGGAAGGTCCCCCACATTGGTACTGAGACACGGACCAA	0	0	0	0	0	0	0	0	0	0	0	0	0	0	0	0	0	0	0	0	0	0	0	0	0	0	0	0	0	0	0	0	0	0	0	0	0	0	0	0	0	0	0	0	0	0	0	0
849	GACGAACGCTGGCGGCGTGCTTAACACATGCAAGTCGAACGGAAAGGCCCTGCTTGCAGGGTACTCGAGTGGCGAACGGGTGAGTAACACGTGGGTGATCTGCCCTGCACTTCGGGATAAGCCTGGGAAACTGGGTCTAATACCGGATAGGACCATCGTTTAGTGTCGGTGGTGGAAAGTTTTTCGGTGCAGGATGAGCCCGCGGCCTATCAGCTTGTTGGTGGGGTAATGGCCTACCAAGGCGTCGACGGGTAGCCGGCCTGAGAGGGTGGACGGCCACATTGGGACTGAGACACGGCCCAG	0	0	0	0	0	0	0	0	0	0	0	0	0	0	0	0	0	0	0	0	0	0	0	0	0	0	0	0	0	0	0	0	0	0	0	0	0	0	0	0	0	0	0	0	0	0	0	0
850	GATGAACGCCGGCGGTGTGCCTAATACATGCAAGTCGAACGCGTTGGCCCAATTGATTGATGGTGCTTGCACCTGATTGATTTTGGTCGCCAACGAGTGGCGGACGGGTGAGTAACACGTAGGTAACCTGCCCAGAAGCGGGGGACAACATTTGGAAACAGATGCTAATACCGCATAACAGCGTTGTTCGCATGAACAACGCTTAAAAGATGGCTTCTCGCTATCACTTCTGGATGGACCTGCGGTGCATTAGCTTGTTGGTGGGGTAACGGCCTACCAAGGCGATGATGCATAGCCGAGTTGAGAGACTGATCGGCCACAATGGGACTGAGACACGGCCCAT	0	0	0	0	0	0	0	0	0	0	0	0	0	0	0	0	0	0	0	0	0	0	0	0	0	0	0	0	0	0	0	0	0	0	0	0	0	0	0	0	0	0	0	0	0	0	0	0
851	ATTGAACGCTGGCGGAATGCTTTACACATGCAAGTCGAACGGTAGAGGGGGCAACCCCTTGAGAGTGGCGAACGGGTGAGTAATGTATCGGAACGTGCCCAGTCGTGGGGGATAACGTAGTGAAAATTACGCTAATACCGCATACGATCTATGGATGAAAGCGGGGGATCGCAAGACCTCGCGCGATTGGAGCGGCCGATATCAGATTAGGTAGTTGGTGGGGTAAAGGCTCACCAAGCCAACGATCTTTAGCTGGTCTGAGAGGACGACCAGCCACACTGGAACTGAGACACGGTCCAG	0	0	0	0	0	0	0	0	0	0	0	0	0	0	0	0	0	0	0	0	0	0	0	0	0	0	0	0	0	0	0	0	0	0	0	0	0	0	0	0	0	0	0	0	0	0	0	0
852	GATGAACGCTGGCGGCGTGCCTAATACATGCAAGTCGAGCGAACAGATAAGGAGCTTGCTCCTTTGATGTTAGCGGCGGACGGGTGAGTAACACGTGGGTAACCTACCTATAAGACTGGGATAACTTCGGGAAACCGGAGCTAATACCGGATAATATTTCGAACCGCATGGTTCGATAGTGAAAGATGGTTTTGCTATCACTTATAGATGGACCCGCGCCGTATTAGCTAGTTGGTAAGGTAACGGCTTACCAAGGCGACGATACGTAGCCGACCTGAGAGGGTGATCGGCCACACTGGAACTGAGACACGGTCCAG	0	0	0	0	0	0	0	0	0	0	0	0	0	0	0	0	0	0	0	0	0	0	0	0	0	0	0	0	0	0	0	0	0	0	0	0	0	0	0	0	0	0	0	0	0	0	0	0
853	ATTGAACGCTGGCGGCATGCCTTACACATGCAAGTCGAACGGCAGCACGGGTGCTTGCGCCTGGTGGCGAGTGGCGAACGGGTGAGTAATACATCGGAATGTACCTTGTAGTGGGGGATAGCTCGGCGAAAGCCGGATTAATACCGCATACGCTCTGAGGAGGAAAGCGGGGGACCTTCGGGCCTCGCGCTACAAGAGCAGCCGATGTCAGATTAGCTAGTTGGTGAGGTAAAAGCTCACCAAGGCGACGATCTGTAGCTGGTCTGAGAGGACGACCAGCCACACTGGGACTGAGACACGGCCCAG	0	0	0	0	0	0	0	0	0	0	0	0	0	0	0	0	0	0	0	0	0	0	0	0	0	0	47	0	0	0	0	0	0	0	0	0	0	0	0	0	0	0	0	0	0	0	0	0
854	GACGAACGCTGGCGGCGTGCCTAATACATGCAAGTCGAGCGAAGTTTTTCTGGTGCTTGCACTAGAAAAACTTAGCGGCGAACGGGTGAGTAACACGTAAAGAACCTGCCTCATAGACGGGGACAACTATTGGAAACGATAGCTAATACCGGATAACAGCATAAATCGCATGATATATGTTTAAAAGTTGGTTTCGGCTAACACTATGAGATGGCTTTGCGGTGCATTAGCTAGTTGGTGGGGTAAAGGCCTACCAAGGCGACGATGCATAGCCGACCTGAGAGGGTGATCGGCCACACTGGGACTGAGACACGGCCCAG	0	0	0	0	0	0	0	0	0	0	0	0	0	0	0	0	0	0	0	118	0	0	0	0	0	30	113	0	0	0	0	0	0	0	0	0	0	0	0	0	0	0	0	0	0	0	0	0
855	GATGAACGCTAGCGGGAGGCTTAACACATGCAAGCCGAGGGGTATAGTTCTTTCGGGAACTAGAGACCGGCGCACGGGTGCGTAACGCGTATGCAACTTGCCCTACTGAAAAGGATAGCCCTTCGAAAGGAGGATTAATACTTTATAACAGATTTAATGGCATCATTAAATTTTGAAAGATTTATCGCAGTAGGATAGGCATGCGTAAGATTAGTTAGTTGGTGAGGTAACGGCTTACCAAGACGATGATCTTTAGGGGGCCTGAGAGGGTGAACCCCCACACTGGTACTGAGACACGGACCAG	0	0	0	0	0	0	0	0	0	0	0	0	0	0	0	0	0	0	0	0	0	0	0	0	0	0	0	0	0	0	0	508	0	0	0	0	0	0	0	0	0	0	0	0	0	0	0	0
856	GACGAACGCTGGCGGCGTGCTTAACACATGCAAGTCGTACGGTAAGGCCCTTTCGGGGGTACACGAGTGGCGAACGGGTGAGTAACACGTGAGTAACCTGCCCACAACTTTGGGATAACGCTAGGAAACTGGTGCTAATACTGGATATGTGCTCCTGCTGCATGGTAGGGGTTGGAAAGCTCCGGCGGTTGTGGATGGACTCGCGGCCTATCAGCTTGTTGGTGGGGTAGTGGCCTACCAAGGCGGCGACGGGTAGCCGGCCTGAGAGGGTGACCGGCCACATTGGGACTGAGATACGGCCCAG	0	0	0	0	0	0	0	0	0	0	0	0	0	0	491	0	0	0	0	0	0	0	0	0	0	0	0	0	0	0	0	0	0	0	0	0	0	0	0	0	0	0	0	0	0	0	0	0
857	ATTGAACGCTGGCGGCATGCCTTACACATGCAAGTCGAACGGTAACAGGTCTTCGGATGCTGACGAGTGGCGAACGGGTGAGTAATACATCGGAACGTGCCCGATCGTGGGGGATAACGGAGCGAAAGCTTTGCTAATACCGCATACGATCTACGGATGAAAGCAGGGGACCGCAAGGCCTTGCGCGGACGGAGCGGCCGATGGCAGATTAGGTAGTTGGTGGGATAAAAGCTTACCAAGCCGACGATCTGTAGCTGGTCTGAGAGGACGACCAGCCACACTGGGACTGAGACACGGCCCAG	0	0	0	0	0	0	0	0	0	0	0	0	0	0	0	0	0	0	0	0	0	0	0	0	0	0	0	0	0	0	0	0	0	0	0	0	0	0	0	0	0	0	0	0	0	0	0	0
858	GATGAACGCTAGCGGCAGGCCTAACACATGCAAGTCGAGGGGCATCACGAGGTAGCAATACTTTGGTGGCGACCGGCGCACGGGTGCGTAACGCGTATGTAACCTACCTATAACAGGGGCATAACACTGAGAAATTGGTACTAATTCCCCATAATATTCGGAGAGGCATCTCTCCGGGTTGAAAACTCCGGTGGTTATAGATGGACATGCGTTGTATTAGCTAGTTGGTGAGGTAACGGCTCACCAAGGCAACGATACATAGGGGGACTGAGAGGTTAACCCCCCACACTGGTACTGAGACACGGACCAG	0	0	0	0	0	0	0	0	0	0	0	0	0	0	0	0	0	0	0	56	0	0	0	0	0	9	0	0	0	0	0	0	0	0	0	6	0	0	0	0	0	0	0	0	0	0	0	0
859	GATGAACGCTGGCGGCGTGCCTAACACATGCAAGTCGAGCGATGAAATTTCCTTCGGGAAATGGATTAGCGGCGGACGGGTGAGTAACACGTGGGTAACCTGCCTCATAGTGGGGGATAGCCTTCCGAAAGGGAGATTAATACCGCATAACATCATTAGATGGCATCATTTAGTGATCAAAGGATTTATTCGCTATGAGATGGACCCGCGTCGCATTAGCTAGTTGGTAGGGTAATGGCTTACCAAGGCGACGATGCGTAGCCGACCTGAGAGGGTGATCGGCCACATTGGGACTGAGACACGGCCCAG	0	0	0	0	0	0	0	0	0	0	0	0	0	0	0	0	0	0	0	0	0	0	0	0	0	0	0	0	0	0	0	0	45	0	0	0	0	0	0	0	0	0	0	0	0	0	0	0
860	ATTGAACGCTGGCGGCAGGCTTAACACATGCAAGTCGAACGAGGTAGCAATACCTAGTGGCGAACGGGTGAGGAATGCTTGGGAATCTACCGTGTAGTGGGGGATAACGTTTCGAAAGGAACGCTAATACCGCATACGTCCTACGGGAGAAAGGGGGGGATCTTCGGACCTCTCGCTATACGATGAGCCCAAGTCGGATTAGCTAGTTGGTGGGGTAAAGGCCTACCAAGGCGACGATCCGTAGCTGGTCTGAGAGGATGATCAGCCACACTGGAACTGAGACACGGTCCAG	0	0	0	0	0	0	0	0	0	0	0	0	0	0	0	0	130	4	0	8	0	0	0	0	0	0	0	0	0	0	0	0	0	0	0	0	0	0	0	0	0	0	0	0	0	0	0	0
861	GACGAACGCTGGCGGCGTGCTTAATACATGCAAGTCGAACGGAGTTAAGGGTTTCGGCCTTTAACTTAGTGGCGAACGGGTGAGTAACGCGTGAATAACCTGACTCAAAGAGGGGGATAACAACGGGAAACTGTTGCTAATACCGCATGAGACCACAACACCGCATGATGAAGGGGTCAAAGATTTATCGCTTTGAGAGGGGTTCGCGTCCCATTAGGTAGTTGGAGGGGTAACGGCCCACCAAGCCAACGATGGGTAGCCGAGCTGAGAGGCTGATCGGCCACACTGGAACTGAGACACGGTCCAG	0	0	0	0	0	0	0	0	0	0	0	0	0	0	0	0	0	0	0	8	0	0	12	0	0	0	0	3	0	0	0	0	0	0	0	0	0	0	0	0	0	0	0	0	0	0	0	0
862	AACGAACGCTGGCGGCATGCCTAACACATGCAAGTCGAACGAAGCCTTCGGGCTTAGTGGCGCACGGGTGCGTAACGCGTGGGAATCTGCCTCTTGCTTCGGAATAACAGTGGGAAACTACTGCTAATACCGGATGATGTCTTCGGACCAAAGATTTATCGGCAAGAGATGAGCCCGCGTAGGATTAGGTAGTTGGTGGGGTAAAGGCCTACCAAGCCGACGATCCTTAGCTGGTCTGAGAGGATGATCAGCCACACTGGGACTGAGACACGGCCCAG	0	0	0	0	0	0	0	0	0	0	0	0	0	0	0	0	0	0	0	0	0	0	0	0	0	0	0	0	0	0	0	0	0	0	0	0	0	0	0	0	0	0	0	0	0	0	0	0
864	GATGAACGCTAGCGATAGGCTTAACACATGCAAGTCGAGGGGCAGCGAGATGTAGCAATACGTCGTCGGCGACCGGCGAATGGGTGAGTAACACGTATGCAACTTACCTCTTAGTGGTGAATAACCCGATGAAAGTCGGACTAATACACCATACTCTCCTTAGATCACATGAGAAGAGGAGGAAAGATTAATCGCTAAGAGATAGGCCTGCGTTCCATTAGCTAGTTGGTAAGGTAACGGCTTACCAAGGCAACGATGGATAGGGGGACTGAGAGGTTGACCCCCCACATTGACACTGAGATACGGGTCAA	0	0	0	0	0	0	0	0	0	0	0	0	0	0	0	0	0	0	0	0	0	0	0	0	0	0	0	0	0	0	0	0	0	0	0	0	0	11	0	0	0	0	0	0	0	0	0	0
865	GATGAACGCTGGCGGCGTGCTTAACACATGCAAGTCGAACGGAAAGGCCAGTGCTTGCACTGGTACTCGAGTGGCGAACGGGTGAGTAACACGTGGGTGATCTGCCCTGCACTTCGGGATAAGCCTGGGAAACTGGGTCTAATACCGGATAGGACGATGGTTTGGATGCCGTTGTGGAAAGTTTTTTCGGTGTGGGATGAGCTCGCGGCCTATCAGCTTGTTGGTGGGGTAATGGCCTACCAAGGCGTCGACGGGTAGCCGGCCTGAGAGGGTGTACGGCCACATTGGGACTGAGATACGGCCCAG	0	0	0	0	0	0	0	0	0	0	0	0	0	0	0	0	0	0	0	0	0	0	0	0	0	0	0	0	0	0	478	0	0	0	0	0	0	0	0	0	0	0	0	0	0	0	0	0
866	GACGAACGCTGGCGGCGTGCCTAATACATGCAAGTAGAACGCTGAAGGAAGGAGCTTGCTCTTTCTGGATGAGTTGCGAACGGGTGAGTAACGCGTAGGTAACCTGCCTGGTAGCGGGGGATAACTATTGGAAACGATAGCTAATACCGCATAAAATGGATTATCGCATGATAATTCATTGAAAGGTGCAAATGCATCACTACCAGATGGACCTGCGTTGTATTAGCTAGTTGGTGGGGTAACGGCTCACCAAGGCGACGATACATAGCCGACCTGAGAGGGTGATCGGCCACACTGGGACTGAGACACGGCCCAG	0	0	0	0	0	0	0	0	0	0	0	0	0	0	0	503	0	0	0	0	0	0	0	0	0	0	0	0	0	0	0	0	0	0	0	0	0	0	0	0	0	0	0	0	0	0	0	0
867	GACGAACGCTGGCGGCGTGCCTAACACATGCAAGTCGAACGGAACTGTTTTGAAAGATTTCTTCGGAATGAATTTGATTTAGTTTAGTGGCGGACGGGTGAGTAACGCGTGAGTAACCTGCCTTCAAGAGGGGGATAACATTCTGAAAAGAATGCTAATACCGCATGACATATCGGAATCACATGATTCTGATATCAAAGATTTTATCGCTTGAAGATGGACTCGCGTCCGATTAGTTAGTTGGTGAGGTAACGGCTCACCAAGACCGCGATCGGTAGCCGGACTGAGAGGTTGAACGGCCACATTGGGACTGAGACACGGCCCAG	0	0	0	0	0	0	0	0	0	0	0	0	0	0	0	0	0	0	0	0	0	0	0	0	0	0	0	0	0	0	0	0	0	0	0	0	0	0	0	0	0	0	0	0	0	0	0	0
868	GATGAACGCTGGCGGCGCGCCTAACACATGCAAGTCGAACGGTTAAAGCATCTTCGGATGTGTATAAAGTGGCGAACGGCTGAGTAACACGTGGGCAACCTGCCCTTTGCACTGGGATAGCCTCGGGAAACCGAGGTTAATACCGGATACTCCATATTTGTCGCATGGCGAATATGGGAAAGCTCCGGCGGCAAAGGATGGGCCCGCGGCCTGTTAGCTAGTTGGTGGGGTAGTGGCCTACCAAGGCAATGATGGGTAGCCGGGTTGAGAGACCGACCGGCCAGAGGGGGACTGAGACACGGCCAAG	0	0	0	0	0	0	0	0	0	0	0	0	0	0	0	0	0	0	0	0	0	0	0	0	0	0	0	0	0	0	0	0	0	0	0	0	0	0	0	0	0	0	0	0	0	0	0	0
869	GATAAACGCTGGCGGCGTGCATAACACATGCAAGTCGAACGATGAAGCTTAGAAGATTTCTTCGGAATGAACTTAAGTGGATTAGTGGCGAACGGGTGAGTAACACGTGAGTAACCTGCCTTACACAAGGGGATAGCCTCTGGAAACGGAGAATAATACCCTATAAAGTCTAATCAGCTCCTGCTGGAAAGACCAAAGATTTATCGGTGTAAGATGGACTTGCGTCTGATTAGCTAGTTGGTGAGATAAAAGCTCACCAAGGCGACGATCAGTAGCCGGCTTGAGAGAGTGTACGGCCACATTGGGACTGAGACACGGCCCAA	0	0	0	0	0	0	0	0	0	0	0	0	0	0	0	0	0	0	0	0	0	0	0	0	0	0	0	0	0	0	0	0	0	0	0	0	0	0	0	0	0	0	0	0	0	0	0	0
870	GACGAACGCTGGCGGCGTGCTTAACACATGCAAGTCGAACGATGAAGCCGCAGCTTGCTGTGGTGGATTAGTGGCGAACGGGCGAGTAACACGTGAGTAACCTGTCCTTTTCTTTGGGATAACGGCTGGAAACGGCTGCTAATACTGGATATTCAGGCGTCACCGCATGGTGGTGTTTGGAAAGGTTTTTTCTGGGATTGGGTGGGCTCGCGGCCTATCAGCTTGTTGGTGGGGTGATGGCTTACCAAGGCTTTGACGGGTAGCCGGCCTGAGAGGGTGGTCGGTCGCACTGGGACTGAGATACGGCCCAG	0	0	0	0	0	0	0	0	0	0	0	0	0	0	0	0	0	0	0	0	0	0	0	0	0	0	0	0	0	0	0	0	0	0	0	0	0	0	0	0	0	0	0	0	0	0	0	0
871	GACGAACGCTGGCGGCGTGCCTAATACATGCAAGTCGAACGAACGGAGCTAGGAACTTGTTCCCGGCAAAGTTAGTGGCGCACGGGTGAGTAACACGTGGAGAACCTACCCTTTTGCGGGGGATAACCATTGGAAACGATGACTAATACCGCATAGAATCGCAGATCGCATGATCAACGAAGGAAAGACGGCTTCGGCTGTCGCAAAAGGATGGCTCCGCGGTGCATTAGCTAGATGGTGGGGTAACGGCCTACCATGGCAATGATGCATAGCCGACCTGAGAGGGTGATCGGCCACATTGGGACTGAGACACGGCCCAA	0	0	0	0	0	0	0	0	0	0	0	0	0	0	0	0	0	0	0	0	0	0	0	0	0	0	0	0	0	0	0	0	0	0	0	0	0	0	0	0	0	0	0	0	0	0	0	0
872	GATGAACGCTGGCGGCGTGCCTAATACATGCAAGTCGAGCGAACAGACGAGGAGCTTGCTCCTCTGACGTTAGCGGCGGACGGGTGAGTAACACGTGGATAACCTACCTATAAGACTGGGATAACTTCGGGAAACCGGAGCTAATACCGCATAATATATTGAACCGCATGGTTCAATAGTGAAAGACGGTTTTGCTGTCACTTATAGATGGATCCGCGCCGCATTAGCTAGTTGGTAAGGTAACGGCTTACCAAGGCAACGATGCGTAGCCGACCTGAGAGGGTGATCGGCCACACTGGAACTGAGACACGGTCCAG	0	0	0	0	0	0	0	0	0	0	0	0	0	0	0	0	0	0	0	0	0	0	0	0	0	0	0	0	0	0	0	0	0	0	0	0	0	0	0	0	0	0	0	0	0	0	0	0
873	GATAAACGCTGGCGGCGTGCATAACACATGCAAGTCGAACGATGAAACTTAGATGATTTCTTCGGAATGAACTTAAGCGGATTAGTGGCGAACGGGTGAGTAACACGTGAGTAACCTGCCTTACACAAGGGGATAGCCTTTGGAAACGAAGAATAATACCCTATAAAGTCAAACTATCGCATGATAGAGTGACCAAAGATTTATCGGTGTAAGATGGACTTGCGTCTGATTAGCTAGTTGGTGAGATAAAGGCCCACCAAGGCAACGATCAGTAGCCGGCTTGAGAGAGTGTACGGCCACATTGGGACTGAGACACGGCCCAA	0	0	0	0	0	0	0	0	0	0	0	0	0	0	0	0	0	0	0	0	0	0	0	0	0	0	0	0	0	0	0	0	0	0	0	0	0	0	0	0	0	0	0	0	0	0	0	0
874	GATTAACGCTGGCGGCGTGCATAACACATGCAAGTCGAACGATGAAACTCATTAGACTTCTTCGGAATGACAATGAATGGATTAGTGGCGAACGGGTGAGTAACGCGTGAGTAACCTGCCTTACACAAGGGGATAGCCTCTGGAAACGGAGAATAATACCCTATGACATTAATACTTCGCATGAAGTATTAATCAAAGTGTTAGCGGTGTAAGATGGACTTGCGTCTGATTAGCTAGTTGGTGAGATAACAGCCCACCAAGGCAACGATCAGTAGCCGGCTTGAGAGAGTGTACGGCCACATTGGGACTGAGACACGGCCCAG	0	0	0	0	0	0	0	0	0	0	0	0	0	0	0	0	0	0	0	0	0	0	0	0	0	0	0	0	0	0	0	0	0	0	0	0	0	0	0	0	0	0	0	0	0	0	0	0
875	GACGAACGCTGGCGGCGTGCTTAACACATGCAAGTCGAACGGTAAGGCCCCAGCTTGCTGGGGTACACGAGTGGCGAACGGGTGAGTAACACGTGGGTGACCTGCCCCGCACTTCGGGATAAGCCTGGGAAACTGGGTCTAATACCGGATAGGACCGCATCGTGAGGATGTGGTGGAAAGTTTTTTCGGTGTGGGATGGGCCCGCGGCCTATCAGCTTGTTGGTGGGGTAATGGCCTACCAAGGCGGCGACGGGTAGCCGGCCTGAGAGGGTGGACGGCCACATTGGGACTGAGACACGGCCCAG	0	0	0	0	0	0	0	0	0	0	0	0	0	0	0	0	0	0	0	0	0	0	0	0	0	0	0	0	0	0	0	0	0	102	0	0	0	0	0	0	0	0	0	0	0	0	0	0
876	GATAAACGCTGGCGGCGTGCATAACACATGCAAGTCGAACGATGAAACTTAGATGATTTCTTCGGAATGAACTTAAGCGGATTAGTGGCGAACGGGTGAGTAACACGTGAGTAACCTGCCTTACACAAGGGGATAGCCTTTGGAAACGAAGAATAATACCCTATGACGTCAATTTATCGCATGATAGAATGACCAAAGATTTATCGGTGTAAGATGGACTTGCGTCTGATTAGCTAGTTGGTGAGATAAAGGCCCACCAAGGCAACGATCAGTAGCCGGCTTGAGAGAGTGTACGGCCACATTGGGACTGAGACACGGCCCAA	0	0	0	0	0	0	0	0	0	0	0	0	0	0	0	0	0	0	0	0	0	0	0	0	0	0	0	0	0	0	0	0	0	0	0	0	0	0	0	0	0	0	0	0	0	0	0	0
877	GATGAACGCTGGCGGCGTGCTTAACACATGCAAGTCGAGCGAAGCAGTTAAGTTGATTTCTTCGGATTGATTCTTAACTGACTGAGCGGCGGACGGGTGAGTAACGCGTGGGTGACCTGCCCCATACCGGGGGATAACAGCTGGAAACGGCTGCTAATACCGCATAAGCGCACAGAGCTGCATGGCTCGGTGTGAAAAACTCCGGTGGTATGGGATGGGCCCGCGTCTGATTAGGCAGTTGGCGGGGTAACGGCCCACCAAACCGACGATCAGTAGCCGGCCTGAGAGGGCGACCGGCCACATTGGGACTGAGACACGGCCCAA	0	0	0	0	0	0	0	0	0	0	0	0	0	0	0	0	0	0	0	0	0	0	0	0	0	0	0	0	0	0	0	0	0	0	0	0	0	0	0	0	0	0	0	0	0	0	0	0
878	GACAAACGCTGGCGGCATGCCTAACACATGCAAGTCGAACGGACGGAGGAAAGAGACCTCTTCGGAGTGACCTTTCCCGAGTTAGTGGCGGATGGGTGAGTAACGCGTGAGTGACCTGCCCAACAGTGGGGAATAACAGTGAGAAATCATTGCTAATACCGCATAGCTTACAAGTGCTTCATGGTACCTGTAAGAAAGACGGCCTTCGTGCTGTCGCTGTTGGATGGACTCGCGTCTGATTAGCCAGTTGGTGGGGTAACGGCCTACCAAAGCAATGATCAGTAGCCGGCCTGAGAGGGTGAACGGCCACATTGGGACTGAGACACGGCCCAA	0	0	0	0	0	0	0	0	0	0	0	0	0	0	0	0	0	0	0	0	0	0	0	0	0	0	0	0	0	0	0	0	0	0	0	0	0	0	0	0	0	0	0	0	0	0	0	0
879	ATTGAACGCTGGCGGCAGGCTTAACACATGCAAGTCGAACGGTAACAGGAAGAAGCTTGCTTCTTTGCTGACGAGTGGCGGACGGGTGAGTAATGTCTGGGAAACTGCCTGATGGAGGGGGATAACTACTGGAAACGGTAGCTAATACCGCATAACGTCGCAAGACCAAAGAGGGGGACCTTCGGGCCTCTTGCCATCGGATGTGCCCAGATGGGATTAGCTAGTAGGTGGGGTAACGGCTCACCTAGGCGACGATCCCTAGCTGGTCTGAGAGGATGACCAGCCACACTGGAACTGAGACACGGTCCAG	0	0	0	0	0	0	0	0	0	0	0	0	0	0	0	0	0	0	0	0	0	0	0	0	0	0	0	0	0	0	0	0	0	0	0	0	0	0	0	0	0	0	0	0	0	0	0	0
880	GATGAACGCTGGCGGCGTGCTTAACACATGCAAGTCGAACGAAGCTGCTTAACTGATCTTCTTCGGAATTGACGTTTTGTAGACTGAGTGGCGGACGGGTGAGTAACGCGTGGGTAACCTGCCCTGTACAGGGGGATAACAGTCAGAAATGACTGCTAATACCGCATAAGACCACAGCACCGCATGGTGCAGGGGTAAAAACTCCGGTGGTACAGGATGGACCCGCGTCTGATTAGCTGGTTGGTGAGGTAACGGCTCACCAAGGCGACGATCAGTAGCCGGCTTGAGAGAGTGAACGGCCACATTGGGACTGAGACACGGCCCAA	0	0	0	0	0	0	0	0	0	0	0	0	0	0	0	0	0	0	0	11	0	0	0	0	0	0	0	0	0	0	0	0	0	0	0	0	0	0	0	0	0	0	0	0	0	0	0	0
881	GATAAACGCTGGCGGCGTGCCTAACACATGCAAGTCGAACGCCCTTAGCAATAAGGGAGTGGCGGACGGGTGAGGAACACGTGGGTGATCTACCCAGAGGTGAGGAATACCGGCGAGAAATCGCCGACAATACCGCATAGGCTCGGTGCAAGCCGAGCAAAGTCGCAAGACGCCTGTGGATGAGCCTGCGTCCGATTAGCTAGTTGGTGGGGTAAGAGCTCACCAAGGCGACGATCGGTAGCTGGTCTGAGAGGACGATCAGCCACACTGGGATTGAGAACGGCCCAG	0	0	0	0	0	0	0	0	0	0	0	0	0	431	0	0	0	0	0	0	0	0	0	0	0	0	0	0	0	0	0	0	0	0	0	0	0	0	0	0	0	0	0	0	0	0	0	0
882	GATGAACGCTGACAGAATGCTTAACACATGCAAGTCTTTGGCAAATCTGTGCTTGCACAGCCTAGCCAAGGCGGACGGGTGAGTAACGCGTAAAGAACTTACCCTGCAGACAGGGATAACAGACGGAAACGACTGATAATACCTGATACAATTGCCAGCACGCATGTGCCCGGCAATGAAAAGTGATGCTGCAGGAGAGCTTTGCGTCCTATTAGCTTGTTGGTGAGGTAACGGCTCACCAAGGCGATGATAGGTAGCCGGCCTGAGAGGGTGAACGGCCACAAGGGGACTGAGATACGGCCCTT	0	490	0	0	0	0	0	0	0	0	0	0	0	0	0	0	0	0	0	0	0	0	0	0	0	0	0	0	0	0	0	0	0	0	0	0	0	0	0	0	0	0	0	0	0	0	0	0
883	GACGAACGCTGGCGGCGTGCCTAATACATGCAAGTAGGACGCACAGTCTATACCGTAGCTTGCTACACCATAGACTGTGAGTTGCGAACGGGTGAGTAACGCGTAGGTAACCTGCCTATTAGAGGGGGATAACTATTGGAAACGATAGCTAATACCGCATAACAGTATGTAACACATGTTAGATGCTTGAAAGATGCAATTGCATCGCTAGTAGATGGACCTGCGTTGTATTAGCTAGTAGGTAGGGTAATGGCCTACCTAGGCGACGATACATAGCCGACCTGAGAGGGTGATCGGCCACACTGGGACTGAGACACGGCCCAG	0	0	0	0	0	0	0	0	0	0	0	0	0	0	0	0	0	0	0	139	0	0	0	0	0	123	0	0	0	0	0	0	0	0	0	0	0	0	0	0	0	0	0	0	0	0	0	0
884	GATGAACGCTAGCTACAGGCTTAACACATGCAAGTCGCAGGGTAACGTGAGGGAAGCTTGCTTCCCTTGATGACGACTGGCGCACGGGTGAGTAACGCGTATCCAACCTTCCCATGACCACGGGATAACCCGTTGAAAGACGGACTAATACCGTATGACATCGTTTGCTGACATCAAATAACGATTAAAGGTTTAGCGGTGATGGATGGGGATGCGTCTGATTAGCTTGTTGGCGGGGTAACGGCCCACCAAGGCGACGATCAGTAGGGGTTCTGAGAGGAAGGTCCCCCACATTGGAACTGAGACACGGTCCAA	0	0	0	0	0	0	0	0	0	0	0	0	0	0	0	0	0	0	0	0	0	0	0	0	0	0	0	0	0	0	0	0	0	0	0	0	0	0	0	0	0	0	0	0	0	0	0	0
885	GATGAACGCTGGCGGCGTGCCTAATACATGCAAGTCGAGCGAACAGACGGGGAGCTTGCTCCTCTGACGTTAGCGGCGGACGGGTGAGTAACACGTGGATAACCTACCTATAAGACTGGGATAACTTCGGGAAACCGGAGCTAATACCGGATAATATATTGAACCGCATGGTTCAATAGTGAAAGACGGTTTTGCTGTCACTTATAGATGGATCCGCGCCGCATTAGCTAGTTGGTAAGGTAACGGCTTACCAAGGCAACGATGCGTAGCCGACCTGAGAGGGTGATCGGCCACACTGGAACTGAGACACGGTCCAG	0	0	0	0	0	0	0	0	0	0	0	0	0	0	0	0	135	0	0	0	0	0	0	0	0	0	0	0	0	0	0	0	0	0	0	0	0	0	0	0	0	0	0	0	0	0	0	0
886	GATGAACGCTGGCGGCGTGCCTAATACATGCAAGTCGAGCGAACAGACGAGGAGCTTGCTCCTCTGACGTTAGCGGCGGACGGGTGAGTAACACGTGGATAACCTACCTATAAGACTGGGATAACTTCGGGAAACCGGAGCTAATACCGGATAATATATTAAACCGCATGGTTCAATAGTGAAAGACGGTTTTGCTGTCACTTATAGATGGATCCGCGCCGCATTAGCTAGTTGGTAAGGTAACGGCTTACCAAGGCAACGATGCGTAGCCGACCTGAGAGGGTGATCGGCCACACTGGAACTGAGACACGGTCCAG	0	0	0	0	0	0	0	0	0	0	0	0	0	0	0	0	0	0	0	0	0	0	0	0	0	0	0	0	0	0	0	0	0	0	0	0	0	0	0	0	0	0	0	0	0	0	0	0
887	GACGAACGCTGGCGGCGTGCCTAATACATGCAAGTAGAACGCTGAAGAGAGGAGCTTGCTCTTCTTGGATGAGTTGCGAACGGGTGAGTAACGCGTAGGTAACCTGCCTGGTAGCGGGGGATAACTATTGGAAACGATAGCTAATACCGCATAAGAGTAGATGTTGCATGACATTTGCTTAAAAGGTGCAATTGCATCACTACCAGATGGACCTGCGTTGTATTAGCTAGTTGGTGAGGTAACGGCTCACCAAGGCGACGATACATAGCCGACCTGAGAGGGTGATCGGCCACACTGGGACTGAGACACGGCCCAG	0	484	0	0	0	0	0	0	0	0	0	0	0	0	0	0	0	0	0	0	0	0	0	0	0	0	0	0	0	0	0	0	0	0	0	0	0	0	0	0	0	0	0	0	0	0	0	0
888	GATGAACGCTAGCGATAGGCTTAACACATGCAAGTCGAGGGGCAGCGCGAGGTAGCAATACTTTGGCGGCGACCGGCGCACGGGTGCGTAACACGTATGTAACTTACCTCTTACAATCGGATAACACGGTGAAAGTCGTGCTAATACGGTATAGTTTCGCAAGCTCGCATGGGCATGCGAATAAAGATTCATCGGTAAGAGATAGACATGCGGTCCATTAGATAGTTGGTGAGGTAACGGCTCACCAAGTCGACGATGGATAGGGGGACTGAGAGGTTGACCCCCCACACTGGTACTGAGACACGGACCAG	0	0	0	0	0	0	0	0	0	0	0	0	0	0	0	0	0	0	0	0	0	0	0	0	0	0	0	0	0	0	0	0	0	0	0	0	0	2	0	0	0	11	33	0	0	0	0	0
889	ATTGAACGCTGGCGGCATGCTTTACACATGCAAGTCGAACGGCAACGAGGAGAAGCTTGCTTCTCTGTCGGCGAGTGGCGAACGGGTGAGTATAGCATCGGAACGTGCCAAGTAGTGGGGGATAACCAAACGAAAGTTTGGCTAATACCGCGTAAGCTCTAAGGAGGAAAGTAGGGGACCTAAATAAGGCCTTACGCTATTTGATCGGCCGATGTCGGATTAGCTAGTTGGTGGGGTAATGGCTCACCAAGGCAATGATCCGTAGCGGGTCTGAGAGGACGATCCGCCACACTGGGACTGAGACACGGCCCAG	0	0	0	0	0	0	0	0	0	0	0	0	0	0	0	0	0	0	0	0	0	0	0	0	0	0	0	0	0	0	0	0	0	0	0	0	0	0	0	0	0	0	0	0	0	0	0	0
890	GATGAACGCTGGCGGCGTGCTTAACACATGCAAGTCGAACGGAAAGGCCCAAGCTTGCTTGGGTACTCGAGTGGCGAACGGGTGAGTAACACGTGGGTGATCTGCCCTGCACTTCGGGATAAGCCTGGGAAACTGGGTCTAATACCGGATAGGACCACTTCGTAGTTGTTGTGGTGGAAAGTTTTTTCGGTGTGGGATGAGCTCGCGGCCTATCAGCTTGTTGGTGGGGTAATGGCCTACCAAGGCGTCGACGGGTAGCCGGCCTGAGAGGGTGTACGGCCACATTGGGACTGAGATACGGCCCAG	0	0	0	0	0	0	0	0	0	0	0	0	0	0	0	0	0	0	0	0	0	0	0	0	0	0	0	0	0	129	0	0	0	0	0	0	0	0	0	0	0	0	0	0	0	0	0	0
891	GACGAACGCTGGCGGCGTGCCTAATACATGCAAGTCGAGCGAGCTTGCCTATAGAAATTCTTTGGAATGGACATAGATACAAGCTAGCGGCGGATGGGTGAGTAACGCGTGGGTAACCTGCCCTTAAGTCTGGGATACCATTTGGAAACAGATGCTAATACCGGATAAAAGCTACTTTCGCATGAAAGAAGTTTAAAAGGCGGCGTAAGCTGTCGCTAAAGGATGGACCTGCGATGCATTAGCTAGTTGGTAAGGTAACGGCTTACCAAGGCGATGATGCATAGCCGAGTTGAGAGACTGATCGGCCACATTGGGACTGAGACACGGCCCAA	0	0	0	0	0	0	0	0	0	0	0	0	0	0	0	0	0	0	0	0	0	0	0	0	0	0	0	0	0	0	0	0	0	0	0	0	0	0	0	0	0	0	0	0	0	0	0	0
892	GACGAACGCTGGCGGCGTGCTTAACACATGCAAGTCGAACGATGAAGCCCAGCTTGCTGGGTGGATTAGTGGCGAACGGGTGAGTAACACGTGAGCAACGTGCCCATAACTCTGGGATAACCTCCGGAAACGGTGGCTAATACTGGATATCTAACATGATCGCATGGTCTGTGTTTGGAAAGATTTTTTGGTTATGGATCGGCTCACGGCCTATCAGCTTGTTGGTGAGGTAATGGCTCACCAAGGCGACGACGGGTAGCCGGCCTGAGAGGGTGACCGGCCACACTGGGACTGAGACACGGCCCAG	0	0	0	0	0	0	0	0	0	0	0	0	0	0	0	0	0	0	0	0	0	0	0	0	0	0	0	0	0	0	0	0	0	0	0	0	0	0	0	0	0	0	0	0	0	0	0	0
893	GATGAACGCTGGCGGCGTGCCTAATACATGCAAGTCGAGCGAACAGACGAGGAGCTTGCTCCTCTGACGTTAGCGGCGGACGGGTGAGTAACACGTGGATAACCTACCTATAAGATTGGGATAACTTCGGGAAACCGGAGCTAATACCGGATAATATATTGAACCGCATGGTTCAATAGTGAAAGACGGTTTTGCTGTCACTTATAGATGGATCCGCGCCGCATTAGCTAGTTGGTAAGGTAACGGCTTACCAAGGCAACGATGCGTAGCCGACCTGAGAGGGTGATCGGCCACACTGGAACTGAGACACGGTCCAG	0	0	0	0	0	0	0	0	0	0	0	0	0	0	0	0	0	0	0	0	0	0	0	0	0	0	0	0	0	0	0	0	0	0	0	0	0	0	0	0	0	0	0	0	0	0	0	0
894	GACGAACGCTGGCGGCGCGCTTAACACATGCAAGTCGAGCGATGAAATTTCGACAGATCCCTTCGGGGTGAAGATGAAATGGATTAGCGGCGGACGGGTGAGTAACACGTGAGTAACCTGCCTTTGACATTGGGATAGCCTCGGGAAACTGGGATTAATACCAAATGACACTAACTGATCACATGATCAATTAGTCAAAGAAATTCGGTCAAAGATGGACTCGCGGCTGATTAGCTAGTTGGTGAGGTAACGGCCCACCAAGGCGACGATCAGTAGCCGGCCTGAGAGGGTGATCGGCCACATTGGAACTGAGACACGGTCCAA	0	0	0	0	0	0	0	0	0	0	0	0	0	0	0	0	0	0	0	0	0	0	0	0	0	0	0	0	0	0	0	0	0	0	0	0	0	0	0	0	0	0	0	0	0	0	113	0
895	GATTAACGCTGGCGGCATGCCTAATACATGCAAGTCGAGCGAGTCTGCCTTGAAGATCGGAGTGCTTGCACTCTGTGAAACAAGATACAGGCTAGCGGCGGACGGGTGAGTAACACGTGGGTAACCTGCCCAAGAGATCGGGATAACACCTGGAAACAGATGCTAATACCGGATAACAACAGATGATGCCTATCAACTGTTTAAAAGATGGTTCTGCTATCACTCTTGGATGGACCTGCGGTGCATTAGCTAGTTGGTAGGGTAACGGCCTACCAAGGCGATGATGCATAGCCGAGTTGAGAGACTGATCGGCCACATTGGGACTGAGACACGGCCCAA	0	0	0	0	0	0	0	0	0	0	0	0	0	0	0	0	0	0	0	0	0	0	0	0	0	0	0	0	0	0	0	0	0	0	0	0	0	0	0	0	0	0	0	0	0	0	0	0
896	GATGAACGCTAGCTACAGGCTTAACACATGCAAGTCGAGGGGAAACGACATCGAAAGCTTGCTTTTGATGGGCGTCGACCGGCGCACGGGTGAGTAACGCGTATCCAACCTGCCCACCACTTGGGGATAACCTTGCGAAAGTAAGACTAATACCCAATGACGTCTCTAGAAGACATCTGAAAGAGATTAAAGATTTATCGGTGATGGATGGGGATGCGTCTGATTAGCTTGTTGGCGGGGTAACGGCCCACCAAGGCGACGATCAGTAGGGGTTCTGAGAGGAAGGTCCCCCACATTGGAACTGAGACACGGTCCAA	0	0	0	0	0	0	0	0	0	0	0	0	0	0	0	0	0	0	0	0	0	0	0	0	0	63	0	0	0	0	0	0	0	0	0	0	0	0	0	0	0	0	0	0	0	0	0	0
897	GATTAACGCTGGCGGCGTGCATAACACATGCAAGTCGAACGATGAAGCTTAAATGAACTCTTCGGAGTGATTTTAGCCGGATTAGTGGCGGACGGGTGAGTAACGCGTGAGTAACCTGCCTTAGAGAAGGGGATAGCCTTTGGAAACGAAGAATAATACCCTATAACACCAACACCTCGCATGAAGAGTTGGTCAAAGATTTATCGCTCTAAGATGGACTTGCGTCTGATTAGTTAGTTGGTGAGGTAACGGCCCACCAAGACAGCGATCAGTAGCCGGCTTGAGAGAGTGTACGGCCACATTGGGACTGAGACACGGCCCAG	0	0	0	0	0	0	0	0	0	0	0	0	0	0	0	0	0	0	0	0	0	0	0	0	0	0	0	0	0	0	0	0	0	0	0	0	0	0	0	0	0	0	0	0	0	0	0	0
898	GATGAACGCTGGCGGCGTGCTTAACACATGCAAGTCGAACGATGAAGCCCAGCTTGCTGGGCGGATTAGTGGCGAACGGGTGAGTAACACGTGAGTAACCTGCCCTTGACTCTGGGATAAGCCCGGGAAACTGGGTCTAATACCGGATAGGAGCGCCTGTCGCATGACGGGTGTTGGAAAGATTTTTCGGTCATGGATGGACTCGCGGCCTATCAGCTTGTTGGTGAGGTAATGGCTCACCAAGGCGACGACGGGTAGCCGGCCTGAGAGGGTGACCGGCCACACTGGGACTGAGACACGGCCCAG	0	0	0	0	0	0	0	0	0	0	0	0	0	0	0	0	0	0	0	0	0	0	0	0	0	0	0	0	0	0	0	0	0	0	0	0	0	0	0	0	0	0	0	0	0	0	0	0
899	GACGAACGCTGGCGGCGTGCTTAACACATGCAAGTCGAACGGTAAGGCCCCTTCGGGGGTACACGAGTGGCGAACGGGTGAGTAACACGTGAGCAACCTGCCCTTGACTTCGGGATAACAGTTGGAAACAGCTGCTAATACCGAATATGACCTCGACCGTCCTCGGTCGGGGTGGAAAGCTCCGGCGGTCAAGGATGGGCTCGCGGCCTATCAGCTTGTTGGTGAGGTAACGGCTCACCAAGGCTTCGACGGGTAGCCGGCCTGAGAGGGCGACCGGCCACACTGGGACTGAGATACGGCCCAG	0	0	0	0	0	0	0	0	0	0	0	0	0	0	0	0	0	0	0	0	0	0	0	0	0	0	0	0	0	0	0	0	0	0	0	0	0	0	0	0	0	0	0	0	0	0	0	0
900	GACGAACGCTGGCGGCGTGCCTAATACATGCAAGTAGAACGCTGAAGAGAGGAGCTTGCTCTTCTTGGATGAGTTGCGAACGGGTGAGTAACGCGTAGGTAACCTGCCTGGTAGCGGGGGATAACTATTGGAAACGATAGCTAATACCGCATAAAATGGATTATCGCATGATAATGCATTGAAAGGTGCAAATGCATCACTACCAGATGGACCTGCGTTGTATTAGCTAGTTGGTGGGGTAACGGCTCACCAAGGCGACGATACATAGCCGACCTGAGAGGGTGATCGGCCACACTGGGACTGAGACACGGCCCAG	0	0	0	0	0	0	0	0	0	0	0	0	0	0	0	0	0	0	0	138	0	0	0	0	0	40	0	0	0	0	0	0	0	0	0	0	0	0	0	0	0	0	0	0	0	0	0	0
901	ATTGAACGCTGGCGGTATGCTTAACACATGCAAGTCGAACGGCAGCACGAGGAGAGTTTACTCTCTTCGGTGGCGAGTGGCGGACGGGTGAGTAATGCATAGGAATCTACCTTTTAGTCTAGGATAACTACCCGAAAGGGTGGCTAATACTGGATGTGGACTACGGTTTAAAGCAGGGGATCTTCGGACCTTGCGCTAAGAGATGAGCCTATGTGGGATTAGCTAGTTGGTGAGGTAATGGCTCACCAAGGCGACGATCTCTAGCTGGTTTGAGAGGATGATCAGCCACACTGGGACTGAGACACGGCCCAG	0	0	0	0	0	0	0	0	0	0	0	0	0	0	0	0	0	0	0	0	0	0	0	0	0	0	0	0	469	0	0	0	0	0	0	0	0	0	0	0	0	0	0	0	0	0	0	0
902	AGTGAACGCTGGCGGCAGGCCTAATACATGCAAGTCGAACGGCAGCACAGCAGAGCTTGCTCTGTGGGTGGCGAGTGGCGGACGGGTGAGGAATACGTGGGAATCTGCCCAGTCGTGGGGGATAACGTAGGGAAACTTACGCTAATACCGCATGCGCCCTTTGGGGGAAAGCCGGGGACCTTCGGGCCTGGCGCGATTGGATGAGCCCACGTCGGATTAGCTAGTTGGCGGGGTAACGGCCCACCAAGGCGACGATCCGTAGCTGGTCTGAGAGGATGATCAGCCACACTGGAACTGAGACACGGTCCAG	0	0	0	0	0	0	0	0	0	0	0	0	0	0	0	0	0	0	0	0	0	0	0	0	0	0	0	0	0	0	0	0	0	0	0	0	0	0	0	0	0	0	0	0	0	0	0	0
903	GACGAACGCTGGCGGCGTGCTTAACACATGCAAGTCGAACGAGACAATTAAAAGCTTGCTTTTAAACGTCGAGTGGCAAACGGGTGAGTAACGCGTAGACAACCTGCCGCAAAGATGGGGACAACAGTTCGAAAGGACTGCTAATACCGAATGTTCTGGAAGTTCCGCATGGAAATTCCAGTAAAGATGGCCTCTACTTGTAAGCGATCGCTTTGCGATGGGTCTGCGTCTGATTAGCTAGTTGGTAGGGCAACGGCCTACCAAGGCGACGATCAGTAGCCGGTCTGAGAGGATGAACGGCCACATTGGGACTGAGACACGGCCCAG	0	0	0	0	0	0	0	0	0	0	0	0	0	0	0	0	0	0	0	0	0	0	0	0	0	0	0	0	0	0	0	0	0	0	0	0	0	0	0	0	0	0	0	0	0	0	0	0
904	GACGAACGCTGGCGGCGTGCTTAACACATGCAAGTCGAGCGGTAAGGCCTTTCGGGGTACACGAGCGGCGAACGGGTGAGTAACACGTGGGTGATCTGCCCTGCACTTCGGGATAAGCCTGGGAAACTGGGTCTAATACCGGATATGACCTCCTATCGCATGGTGGGTGGTGGAAAGATTTATCGGTGCAGGATGGGCCCGCGGCCTATCAGCTTGTTGGTGGGGTAATGGCCTACCAAGGCGACGACGGGTAGCCGACCTTAGAGGGTGACCGGCCACACTGGGACTGAGACACGGCCCAG	0	0	0	0	0	0	0	0	0	0	0	0	0	0	0	0	0	0	0	0	0	0	0	0	0	0	0	0	0	0	0	0	0	0	0	0	0	0	0	0	0	0	0	0	0	0	0	0
905	GATTAACGCTGGCGGCGTGCATAACACATGCAAGTCGAACGATGAAACTTAAATGATTTCTTCGGAATGAACTTAAGTGGATTAGTGGCGGACGGGTGAGTAACGCGTGAGTAACCTGCCTTACACAAGGGGATAGCCGTTGGAAACGACGAATAATACCCTATGAAGTTACTATCTCGCATGAGATAATAACCAAAGTGTTAGCGGTGTAAGATGGACTTGCGTCTGATTAGCTAGTTGGTGAGAAAAAAGCCCACCAAGGCAACGATCAGTAGCCGGCTTGAGAGAGTGTACGGCCACATTGGGACTGAGACACGGCCCAG	0	0	0	0	0	0	0	0	0	0	0	0	0	0	0	0	0	0	0	0	0	0	0	0	0	0	0	0	0	0	0	0	0	0	0	0	0	0	0	0	0	0	0	0	0	0	0	0
906	GATGAATGCTGGCGGCGTGGATAAGGCATGCAAGTCGAGTGGGTTTAGACCCACGGCAGACGAGGTAGTAACACGTAGGAACGTACCCCAAAGTCAGGGATATTCCATCGAAAGATGGCGCAATACCTGATAGTCTCTAAGGAGTAAAGATTTATCGCTTTGGGAGCGGCCTGCGTAATATCAGCTAGTTGGTGAGGTAATGGCTCACCAAGGCTATGACGTTTAGGGGAGCTGAGAGGCTGACCCCCACCGATGGAACTGAGATACGGTCCTT	0	0	0	0	0	0	0	0	0	0	0	0	0	0	0	0	0	0	0	0	0	0	0	0	0	0	0	0	0	0	0	0	0	0	0	0	0	0	0	0	0	0	0	0	0	0	0	0
907	AACGAACGTTAGCGGCGCGCCTAACACATGCAAGTCGCACGAGAAAGGGCTTCGGCCCCGGTACAGTGGCGCACGGGTGAGTAACACGTGGGTAATGTTTCCTCGGGCGGGGGATAACCTTCCGAAAGGAGGGCTAATACCGCATAAGACCACGGCTTCGAAAGAAGCTGAGGTCAAAGCAGGCCTCTTCATGAAAGCTTGCACCTGAGGATCAGCCCGCGGCCCATCAGCTTGTTGGCAGGGTAACGGCCTACCAAGGCTAAGACGGGTAGCTGGTCTGAGAGGATGATCAGCCACACTGGAACTGAGACACGGTCCAG	0	0	0	0	0	0	0	0	0	0	0	0	0	0	0	0	0	0	0	0	0	0	0	0	0	0	0	0	0	0	462	0	0	0	0	0	0	0	0	0	0	0	0	0	0	0	0	0
908	GATGAACGCTAGCTATAGGCTTAACACATGCAAGTCGAGGGGAAACGGCAGAGAGTGCTTGCACACTTTGGACGTCGACCGGCGCACGGGTGAGTAACGCGTATCCAACCTGCCCTTTACTTGGGGATAACCCGTTGAAAGACGGACTAATACCCAATGATATTCATTGATGACATCTGATTTGAATTAAAGATTTATCGGTATAGGATGGGGATGCGTCTGATTAGCTTGTTGGTGAGGTAACGGCTCACCAAGGCTACGATCAGTAGGGGTTCTGAGAGGAAGGTCCCCCACATTGGAACTGAGACACGGTCCAA	0	0	0	0	0	0	0	0	0	0	0	0	0	0	0	0	0	0	0	0	0	0	0	0	0	0	0	0	0	0	0	0	0	0	0	0	0	0	0	0	0	0	0	0	0	0	0	0
909	GATGAACGCTGGCGGCGTGCCTAACACATGCAAGTCGAACGGAGGTTGTTCGCTGCCTAGTCTTCGGACGAAGCTTGAACAACCTTAGTGGCGGACGGGTGAGTAACGCGTGGGCAACCTGCCTTGCACAGGGGGATAGCAGTTGGAAACGACTGGTAATACCGCATACCTTGGAGAGACCGCATGATCACTTCAAGAAAACAATAGTGGTGCGAGATGGGCCCGCGTCCGATTAGATAGTTGGTGGGGTAACGGCCTACCAAGTCGACGATCGGTAGCCGACCTAAGAGGGCGGACGGCCACATTGGGACTGAGACACGGCCCAG	0	0	0	0	0	0	0	0	0	0	0	0	0	0	0	0	0	0	0	0	0	0	0	0	0	0	0	0	0	0	0	0	0	0	0	0	0	0	0	0	0	0	0	0	0	0	0	0
910	GATGAACGCTAGCTACAGGCTTAACACATGCAAGTCGCAGGGTAACGTGAGGGAAGCTTGCTTCCCTTGACGACGACTGGCGCACGGGTGAGTAACGCGTATCCAACCTTCCCATGACCACGGGATAACCCGTTGAAAGACGGACTAATACCGTATGACGTCGTTTGCTGACATCAAATAACGATTAAAGGTATAGCGGTGATGGATGGGGATGCGTCTGATTAGCTTGTTGGCGGGGTAACGGCCCACCAAGGCTACGATCAGTAGGGGTTCTGAGAGGAAGGTCCCCCACATTGGAACTGAGACACGGTCCAA	0	0	0	0	0	0	0	0	0	0	0	0	0	0	0	0	0	0	0	0	0	0	0	0	0	0	0	0	0	0	0	0	0	0	0	0	0	0	0	0	0	0	0	0	0	0	0	0
911	GACGAACGCTGGCGGCGTGCCTAATACATGCAAGTCGAGCGGACGAATCGAAAGCTTGCTTTTGATTCGTTAGCGGCGGACGGGTGAGTAACACGTGGGCAACCTGCCCTGTAGACGGGGATAACACCGAGAAATCGGTGCTAATACCGGATAACACGAAATGTCGCATGACGTTTCGTTGAAAGACGGCGCAAGTTGTCGCTACAGGATGGGCCCGCGGCGCATTAGCTAGTTGGTGAGGTAACGGCTCACCAAGGCGACGATGCGTAGCCGACCTGAGAGGGTGATCGGCCACACTGGGACTGAGACACGGCCCAG	0	0	0	0	0	0	0	0	0	0	0	0	0	0	0	0	0	0	0	0	0	0	0	0	0	0	0	0	0	0	0	0	0	0	0	0	0	0	0	0	0	0	0	0	0	0	0	0
912	GACGAACGCTGGCGGCGTGCTTAACACATGCAAGTCGAACGGAAAGGCCCTGCTTGCAGGGTACTCGAGTGGCGAACGGGTGAGTAACACGTGGGTGATCTGCCCTGCACTTCGGGATAAGCCTGGGAAACTGGGTCTAATACCGGATAGGAGCCATTTTTAGTGTGATGGTTGGAAAGTTCTTTCGGTGTAGGATGAGCTCGCGGCCTATCAGCTTGTTGGTGGGGTAATGGCCTACCAAGGCGGCGACGGGTAGCCGGCCTGAGAGGGTGGACGGCCACATTGGGACTGAGATACGGCCCAG	0	0	0	0	0	0	0	0	0	0	0	0	0	0	0	0	0	0	0	0	0	0	0	0	0	0	0	0	0	0	0	0	0	0	0	0	0	0	0	0	0	0	0	0	0	0	0	0
913	GACGAACGCTGGCGGCGTGCTTAACACATGCAAGTCGAACGGGATTTAGTAAACAGAAGCCTCGGTAGAAGATTACTAATGAGAGTGGCGAACGGGTGAGTAACGCGTGAGCAACCTGCCTATGACAGTGGGATAGCCTCGGGAAACCGGGATTAATACCGCATAAAATCGTAGAAACACATGTTTCAACGGTCAAAGATTTATCGGTCATAGATGGGCTCGCGTCTGATTAGCTAGTTGGTGAGATAACAGCCCACCAAGGCGACGATCAGTAGCCGGTCTGAGAGGATGAACGGCCACATTGGAACTGAGACACGGTCCAA	0	0	0	0	0	0	0	0	0	0	0	0	0	0	0	0	0	0	0	0	0	0	0	0	0	0	0	0	0	0	0	0	0	0	0	0	0	0	0	0	0	0	0	0	0	0	0	0
914	GACGAACGCTGGCGGCGTGCTTAACACATGCAAGTGGAGCGACGAAGCGGGCTTCGGCCCGTGGCAGAGCCGCGAACGGGTGAGTAACACGTGGGTAACCTACCCCGATGACCGGGACAACCCGAGGAAACTCGGGCTAATACCGGATGTTCTGCACTCCTCTAAGGGAGTTCAGCAAAGATAGCTTCGGCCTTCGCATCGGGACGGGCCCGCGGCCCATTAGCTTGTTGGTGGGGTAACGGCCTACCAAGGCGACGATGGGTAGCTGGTCTGAGAGGACGATCAGCCACACTGGGACTGAGACACGGCCCAG	0	0	0	0	0	0	0	0	0	0	0	0	0	0	0	0	0	0	0	0	0	0	0	0	0	0	0	0	0	0	0	0	0	0	0	0	0	0	0	0	0	0	0	0	0	0	0	0
915	GATGAACGCTGGCGGCGTGCCTAACACATGCAAGTCGAACGAAGCACCTTTTGAGATTCTTCGGATGATCGATCGGTGACTGAGTGGCGGACGGGTGAGTAACGCGTGGGTAACCTGCCCTGTACAGGGGGATAACAGCTGGAAACGGCTGCTAATACCGCATAAGCGCACGAGGAGACATCTCCTTGTGTGAAAAACTCCGGTGGTACAGGATGGGCCCGCGTCTGATTAGCTGGTTGGCAGGGTAACGGCCTACCAAGGCAACGATCAGTAGCCGGTCTGAGAGGATGAACGGCCACATTGGAACTGAGACACGGTCCAA	0	0	0	0	0	0	0	0	0	0	0	0	0	0	0	0	0	0	0	23	0	0	0	0	0	0	0	0	0	0	0	0	0	0	0	0	0	0	0	0	0	0	0	0	0	0	0	0
916	GATGAACGCTGGCGGCGTGCTTAACACATGCAAGTCGAACGGAAAGGCCTCTGCTTGCAGGGGTACTCGAGTGGCGAACGGGTGAGTAACACGTGGGTGATCTGCCCTGCACTTCGGGATAAGCCTGGGAAACTGGGTCTAATACCGGATAGGACAATGGTTTGGATGCCGTTGTGGAAAGTTTTTCGGTGTGGGATGAGCTCGCGGCCTATCAGCTTGTTGGTGGGGTAATGGCCTACCAAGGCGTCGACGGGTAGCCGGCCTGAGAGGGTGTACGGCCACATTGGGACTGAGATACGGCCCAG	0	0	0	0	0	0	0	0	0	0	0	0	0	0	0	0	0	0	0	0	0	0	0	0	0	0	0	0	0	0	0	0	0	0	0	0	0	0	0	0	0	0	0	0	0	0	0	0
917	GATGAACGTTGGCGGCATGCTTAACACATGCAAGTCGAACGCGAAGCTGGCCCTTCGGGGCTGGCGGAGAGTGGCGAACGGGTGCGTAACACGTAGGTGACCTGCCTGTCAGTGGGGGACAACCCTTGGAAACAGGGGCTAATACCGCATACGGTGTGGGGGTTTGGAAAACCCACACGAAAGCTTAATGCGCTGACAGAGGGGCCTGCGGCCTATCAGCTAGTTGGTGAGGTAACGGCTCACCAAGGCGACGACGGGTAGCTGACCTGAGAGGGTGGTCAGCCACAGGGGGACTGAGACACGGCCCCC	0	0	0	0	0	0	0	0	0	0	0	0	0	0	0	0	0	0	0	0	0	0	0	0	0	0	0	0	0	0	0	0	0	0	0	0	0	0	0	0	0	0	0	0	0	0	0	0
918	GATGAACGCCGGCGGTGTGCCTAATACATGCAAGTCGAGCGCACTGGCCCAACTGATATGACGTGCTTGCACTGAATTGACGTTGGATTCCCAGTGAGCGGCGGACGGGTGAGTAACACGTGGGTAACCTGCCCTGAAGCGGGGGATAACATCTGGAAACAGGTGCTAATACCGCATAACAACGAAAACCACATGGTTTTCGTTTCAAAGATGGTTTCGGCTATCACTTCAGGATGGGCCCGCGGTGCATTAGCTAGTTGGTAAGGTAACGGCTTACCAAGGCGATGATGCATAGCCGAGTTGAGAGACTGATCGGCCACAATGGAACTGAGACACGGTCCAT	0	0	0	0	0	0	0	0	0	0	0	0	0	0	0	0	0	0	0	0	0	0	0	0	0	0	0	0	0	0	0	0	0	0	0	0	0	0	0	0	0	0	0	0	0	0	0	0
919	GACGAACGCTGGCGGCGTGCCTAATACATGCAAGTCGAACGAACCATAACTTGAACTTGTTCTGGTTAAGGTTAGTGGCGCACGGGTGAGTAACACGTGGGGAACCTGCCCTTTAGTGGGGGATAACAGTCGGAAACGACTGCTAATACCGCATAGACAATTTAATCGCCTGGTTAAATTGGGAAAGGTGCTACGGCATCATTAAAGGATGGCCCCGCGGTGCATTAGCTAGTTGGTAAGGTAACGGCTTACCAAGGCGATGATGCATAGCCGACCTGAGAGGGTGATCGGCCACATTGGGACTGAGACACGGCCCAA	0	0	0	0	0	0	0	0	0	0	0	0	0	0	0	0	0	0	0	0	0	0	0	0	0	0	0	0	0	0	0	0	0	0	0	0	0	0	0	0	0	0	0	0	0	0	0	0
920	GACGAACGCTGGCGGCGTGCCTAATACATGCAAGTCGAACGGACTTTCAAGGGAGCTTGCTCCCGCGAAGGTTAGTGGCGGACGGGTGAGTAACACGTAGGCAACCTGCCTGCAAGACTGGGATAACATTCGGAAACGAATGCTAAGACCGGATACGCAATCTGGCCGCATGGCTGGATTGGGAAACACGGAGCAATCTGTGGCTTGCAGATGGGCCTGCGGCGCATTAGCTAGTTGGTGGGGTAACGGCTCACCAAGGCGACGATGCGTAGCCGACCTGAGAGGGTGAACGGCCACACTGGGACTGAGACACGGCCCAG	0	0	0	0	0	0	0	0	0	0	0	0	0	0	0	0	0	0	0	0	0	0	0	0	0	0	0	0	0	0	2	0	0	0	0	0	0	0	0	0	0	0	0	0	0	0	0	0
921	GATGAACGCTAGCGGCAGGCCTAATACATGCAAGTCGAACGGAGCCGGGGCAACCCGGCTTAGTGGCAAACGGGTGCGTAACGCGTAAGCAACCTGCCCATCACTGGGGGATAGCCCGGCGAAAGCTGGGGTAAACCCGCATAGTCCCCACTTGCCACCTGGCAGTTGGGGTAAACCTTTGGGGTGATGGAGGGGCTTGCGTCTGATTAGGTAGTTGGCGGGGTAAGGGCCCACCAAGCCGATGATCAGTCGGGGTTCTGAGAGGATTGGCCCCCACACGGGTACTGAGAGACGGACCCG	0	0	0	0	0	0	0	0	0	0	0	0	0	0	0	0	0	0	0	0	0	0	0	0	0	0	0	0	0	0	0	0	0	0	0	0	0	0	0	0	0	0	0	0	0	0	0	0
922	GACGAACGCTGGCGGCGTGCTTAACACATGCAAGTCGAACGGAAAGGCCTGCTTTCCCTTGTGGATTGCGGGTGCTCGAGTGGCGAACGGGTGAGTAACACGTGAGTGATCTGCCCCCAACTTGGGTATAAGCCTGGGAAACTGGGTCTAATTCCCGATAGGACTGCAGGGTGGTGCCTGTGGTGGAAAACGATTTTCTAGTGGTTGGGGATGAGCTCGCGGCCTATCAGCTTGTTGGTGGGGTAATGGCCTACCAAGGCGGCGACGGGTAGCCGGCCTGAGAGGGTGGACGGCCACATTGGGACTGAGATACGGCCCAG	0	0	0	0	0	0	0	0	0	0	0	0	0	0	0	0	0	0	0	0	0	0	0	0	0	0	0	0	0	0	0	0	0	0	0	0	0	0	0	0	0	0	0	0	0	0	0	0
923	GATGAACGCTGGCGGCGTGCCTAATACATGCAAGTCGAGCGAACAGACGGGGAGCTTGCTCCCCCGACGTTAGCGGCGGACGGGTGAGTAACACGTGGGTAACCTACCTATAAGACCGGAATAACTCCGGGAAACCGGGGCTAATGCCGGATAACATGTTGGACCGCATGGTCCTACAGTGAAAGACGGTCTTGCTGTCACTTATAGATGGACCCGCGCCGTATTAGCTAGTTGGTAAGGTAACGGCTTACCAAGGCAACGATACGTAGCCGACCTGAGAGGGTGATCGGCCACACTGGAACTGAGACACGGTCCAG	0	0	0	0	0	0	0	0	0	0	0	0	0	0	0	0	0	0	0	0	0	0	0	0	0	0	0	0	0	0	0	0	0	0	0	0	0	0	0	0	0	0	0	0	0	0	0	0
924	ATTGAACGCTGGCGGCAGGCCTAACACATGCAAGTCGAACGGTAACAGGAAGAAGCTTGCTTCTTTGCTGACGAGTGGCGGACGGGTGAGTAATGTCTGGGAAACTGCCTGATGGAGGGGGATAACTACTGGAAACGGTAGCTAATACCGCATAACGTCGCAAGACCAAAGAGAGGGACCTTCGGGCCTCTTGCCATCGGATGTGCCCAGATGGGATTAGCTAGTAGGTGGGGTAACGGCTCACCTAGGCGACGATCCCTAGCTGGTCTGAGAGGATGACCAGCCACACTGGAACTGAGACACGGTCCAG	0	0	0	0	0	0	0	0	0	0	0	0	0	0	0	0	0	0	0	0	0	0	0	0	0	0	0	0	0	0	0	0	0	0	0	0	0	0	0	0	0	0	0	0	0	0	0	0
925	ATTGAACGCTGGCGGCAGGCTTAACACATGCAAGTCGAACGGTAACAGGAGAAAGCTTGCTTTCTTGCTGACGAGTGGCGGACGGGTGAGTAATGCTTGGGAATCTGGCTTATGGAGGGGGATAACGACGGGAAACTGTCGCTAATACCGCGTAGAGTCGAGAGACGAAAGTGCGGGACCTTCGGGCCGCATGCCATAGGATGAGCCCAAGTGGGATTAGGTAGTTGGTGGGGTAAAGGCCTACCAAGCCGACGATCTCTAGCTGGTCTGAGAGGATGACCAGCCACACCGGGACTGAGACACGGCCCGG	0	0	0	0	0	0	0	0	0	0	0	0	0	0	449	0	0	0	0	0	0	0	0	0	0	0	0	0	0	0	0	0	0	0	0	0	0	0	0	0	0	0	0	0	0	0	0	0
926	AGCGAACGCTGGCGGCAGGCTTAACACATGCAAGTCGAACGGGCGTAGCAATACGTCAGTGGCAGACGGGTGAGTAACACGTGGGAACGTACCTCTTGGTTCGGAACAACACAGGGAAACTTGTGCTAATACCGGATAAGCCCTTACGGGGAAAGATTTATCGCCGAGAGATCGGCCCGCGTCTGATTAGCTAGTTGGTAGGGTAATGGCCTACCAAGGCGACGATCAGTAGCTGGTCTGAGAGGATGATCAGCCACATTGGGACTGAGACACGGCCCAA	0	0	0	0	0	0	0	0	0	0	0	0	0	0	0	0	0	0	0	0	0	0	0	0	0	0	0	0	0	0	0	0	0	0	0	0	0	0	0	0	0	0	0	0	0	0	0	0
927	GACGAACGCTGGCGGCGTGCTTAACACATGCAAGTCGAGCGATGAAGTTTCTTCGGAAATGGATTAGCGGCGAACGGGTGAGGAACACGTGAAGAATCTGCCCTCCACTTTGGGATAACACCGGGAAACCGGTGCTAATACCGAATATTGAAACATAAGTGGCATCACTGAGTTTTGAAAGAATTTCGGTGGAGGATGACTTCGCGGCCTATCAGCTAGTTGGTGAGGTAATGGCTCACCAAGGCAACGACGGGTAGCCGGCCTGAGAGGGCGACCGGCCACACTGGGACTGAGACACGGCCCAG	0	0	0	150	0	0	0	0	0	0	0	0	0	0	0	0	0	0	0	0	0	0	0	0	0	0	0	0	0	0	0	0	0	0	0	0	0	0	2	0	0	0	0	0	0	0	0	0
928	ATTGAACGCTGGCGGCAGGCTTAACACATGCAAGTCGAGCGGTAGCACAGGGGAGCTTGCTCCCCGGGTGACGAGCGGCGGACGGGTGAGTAATGTCTGGGAAACTGCCTGATGGAGGGGGATAACTACTGGAAACGGTAGCTAATACCGCATAACGTCGCAAGACCAAAGAGGGGGACCTTCGGGCCTCTTGCCATCAGATGTGCCCAGATGGGATTAGCTAGTAGGTGGGGTAATGGCTCACCTAGGCGACGATCCCTAGCTGGTCTGAGAGGATGACCAGCCACACTGGAACTGAGACACGGTCCAG	0	0	0	0	0	0	0	0	0	0	0	0	0	0	0	0	0	0	0	0	0	0	0	0	0	0	0	0	0	0	0	0	0	0	0	0	0	0	0	0	0	0	0	0	0	0	0	0
929	GACGAACGCTGGCGGCGCGCTTAACACATGCAAGTCGAGCGATGAAATTTTAACAGATCCTTTCGGGGAGAAGATAAGATGGATTAGCGGCGGACGGGTGAGTAACACGTGAGTAACCTGCCTTTGACACAGGGATAGCCTCGGGAAACCGGGATTAATACCAGATAACATTATCAGATCGCATGAGAAGATAATCAAAGCTGAGGCGGTCAAAGATGGACTCGCGTCCCATTAGCTAGTTGGTAGAGTAATAGCCTACCAAGGCAACGATGGGTAGCCGGCCTGAGAGGGTGAACGGCCACATTGGAACTGAGAAACGGTCCAA	0	0	0	0	0	0	0	0	0	0	0	0	0	0	0	0	0	0	0	0	0	0	0	0	0	0	0	0	0	0	0	0	0	0	0	0	0	14	0	0	0	0	9	0	0	0	0	0
930	GATGAACGCTGGCGGCGTGCTTAACACATGCAAGTCGAACGAAGCACTCTATTTGATTTTCTTCGGAAATGAAGATTTTGTGACTGAGTGGCGGACGGGTGAGTAACGCGTGGGTAACCTGCCTCATACAGGGGGATAACAGTTGGAAACGACTGCTAATACCGCATAAGCGCACAGGATTGCATGATCCGGTGTGAAAAACTCCGGTGGTATGAGATGGACCCGCGTCTGATTAGCCAGTTGGCAGGGTAACGGCCTACCAAAGCGACGATCAGTAGCCGACCTGAGAGGGTGACCGGCCACATTGGGACTGAGACACGGCCCAA	0	0	0	0	0	0	0	0	0	0	0	0	0	0	0	0	0	0	0	0	0	0	0	0	0	52	0	0	0	0	0	0	0	0	0	0	0	0	0	0	0	0	0	0	0	0	0	0
931	GATGAACGCTGGCGGCGTGCTTAACACATGCAAGTCGAGCGAAGCACTTAGGAAAGATTCTTCGGATGATTTCCTATTTGACTGAGCGGCGGACGGGTGAGTAACGCGTGGGTAACCTGCCTCATACAGGGGGATAACAGTTAGAAATGACTGCTAATACCGCATAAGACCACAGCACCGCATGGTGCAGGGGTAAAAACTCCGGTGGTATGAGATGGACCCGCGTCTGATTAGTTAGTTGGTGGGGTAACGGCCTACCAAGGCGACGATCAGTAGCCGACCTGAGAGGGTGACCGGCCACATTGGGACTGAGACACGGCCCAA	0	0	0	0	0	0	0	0	0	0	0	0	0	0	0	0	0	0	0	9	0	0	0	0	0	0	0	0	0	0	0	0	0	0	0	0	0	0	0	0	0	0	0	0	0	0	0	0
932	GATGAACGCTAGCTACAGGCTTAACACATGCAAGTCGCGGGGCAGCATGGGGGTTGCTTACAACCTTTGATGGCGACCGGCGCACGGGTGAGTAACACGTATCCAACCTACTCCTTACAACGGAATAACCCGGCGAAAGTCGGACTAATACCGTATGATATCCTATGCAGGCATCTAACTAGGATTAAAGGTTTAGCGGTAAGGGATGGGGATGCGTCTGATTAGGCAGTTGGCGGGGTAACGGCCCACCAAACCGACGATCAGTAGGGGTTCTGAGAGGAAGGTCCCCCACATTGGAACTGAGACACGGTCCAA	0	0	0	0	0	0	0	0	0	0	0	0	0	0	0	0	0	0	0	0	0	0	0	0	0	0	0	0	0	0	0	0	0	0	0	0	0	0	0	0	0	0	0	0	0	0	0	0
933	GACGAACGCTGGCGGCGTGCCTAATACATGCAAGTCGAGCGAAGTTTTTCTGGTGCTTGCACTAGAAAAACTTAGCGGCGAACGGGTGAGTAACACGTAAAGAACCTGCCTCATAGACTGGGACAACTATTGGAAACGATAGCTAATACCGGATAACAGTATTTCTCGCATGAGAGATATTTAAAAGTTGGTTATGCTAACACTATGAGATGGCTTTGCGGTGCATTAGCTAGTTGGTGGGGTAAAGGCCCACCAAGGCGACGATGCATAGCCGACCTGAGAGGGTGATCGGCCACACTGGGACTGAGACACGGCCCAG	0	0	0	0	0	0	0	215	0	0	0	0	0	0	0	0	0	0	0	0	0	0	0	0	0	26	0	0	0	0	0	0	0	0	0	0	0	0	0	0	0	0	0	0	0	0	0	0
934	GACGAACGCTGGCGGCGTGCTTAACACATGCAAGTCGAACGGGATTTAGTAAACAGAAACCTCGGCGGAAGATTACTAATGAGAGTGGCGAACGGGTGAGTAACGCGTGAGCAACCTGCCTATGACAGTGGGATAGCCTCGGGAAACCGGGATTAATACCGCATAAAATCGTAGAAACACATGTTTCAACGGTCAAAGATTTATCGGTCATAGATGGGCTCGCGTCTGATTAGCTAGTTGGTGAGATAACAGCCCACCAAGGCGACGATCAGTAGCCGGTCTGAGAGGATGAACGGCCACATTGGAACTGAGACACGGTCCAA	0	0	0	0	0	0	0	0	0	0	0	0	0	0	0	0	0	0	0	0	0	181	191	0	53	0	0	0	0	0	0	0	0	0	0	0	0	0	0	0	0	0	0	0	0	0	0	0
935	GATGAACGCTAGCTACAGGCTTAACACATGCAAGTCGAGGGGAAACGACATCGAAAGCTTGCTTTTGATGGGCGTCGACCGGCGCACGGGTGAGTAACGCGTATCCAACCTGCCCATCACTTGGGGATAACCTTGCGAAAGTAAGACTAATACCCAATGATATCTCTAGAAGACATCTGAAAGAGATTAAAGATTTATCGGTGATGGATGGGGATGCGTCTGATTAGCTTGTTGGCGGGGTAACGGCCCACCAAGGCGACGATCAGTAGGGGTTCTGAGAGGAAGGTCCCCCACATTGGAACTGAGACACGGTCCAA	0	0	0	0	0	0	0	0	0	0	0	0	0	0	0	0	0	0	0	0	0	0	0	0	0	35	0	0	0	0	0	0	0	0	0	0	0	0	0	0	0	0	0	0	0	0	0	0
936	GACGAACGCTGGCGGCGTGCCTAATACATGCAAGTCGAGCGGACCAAATCGGAGCTTGCTCTGGTTTGGTCAGCGGCGGACGGGTGAGTAACACGTGGGCAACCTGCCCGCAAGACCGGGATAACTCCGGGAAACCGGAGCTAATACCGGATAACACCGAAGACCGCATGGTCTTTGGTTGAAAGGCGGCCTTTGGCTGTCACTTGCGGATGGGCCCGCGGCGCATTAGCTAGTTGGTGAGGTAACGGCTCACCAAGGCGACGATGCGTAGCCGGCCTGAGAGGGTGACCGGCCACACTGGGACTGAGACACGGCCCAG	0	0	0	0	0	0	0	0	0	0	0	0	0	0	0	0	0	0	0	0	0	0	0	0	0	0	0	0	0	0	0	0	0	0	0	0	0	0	0	0	0	0	0	0	0	0	0	0
937	GATGAACGCTAGCGATAGGCTTAACACATGCAAGTCGAGGGGTAACGTGTTGGAAGCTTGCTTCCGATGACGACGACCGGCGGATGGGTGCGTAACGCGTATGCAACTTGCCTCACAGAGGAGAATAACCCGGAGAAATCCGGACTAATGCTCCATACACTCTTAAGTACGCCTGTACATGAGAGGAAAGATTTATCGCTGTGAGATAGGCATGCGTCCTATTAGGTAGTTGGTGAGGTAACGGCTCACCAAGCCGACGATAGGTAGGGGTGCTGAGAGGCAGATCCCCCACATTGGGACTGAGACACGGCCCAA	0	0	0	0	3	0	0	0	0	0	0	0	0	0	0	0	0	0	0	0	0	0	0	0	0	0	403	0	0	0	0	0	0	0	0	0	0	0	0	0	0	0	0	0	0	0	0	0
938	GATGAACGCTAGCTACAGGCTTAACACATGCAAGTCGAGGGGAAACGGCATTTAGTGCTTGCACCGAATGGACGTCGACCGGCGCACGGGTGAGTAACGCGTATCCAACCTTCCCATAACTAAGGAATAACCTGCCGAAAGGCAGACTAATACCTTATATAATCCTTTGATGGCATCAGATAAGGATAAAAGATTTATCGGTTATGGATGGGGATGCGTCTGATTAGCTTGTTGGCGGGGTAACGGCCCACCAAGGCAACGATCAGTAGGGGTTCTGAGAGGAAGGTCCCCCACATTGGAACTGAGACACGGTCCAA	0	0	0	0	0	0	0	0	0	0	0	0	0	0	0	0	0	0	0	0	0	0	0	0	0	0	0	437	0	0	0	0	0	0	0	0	0	0	0	0	0	0	0	0	0	0	0	0
939	ATTGAACGCTGGCGGCATGCCTTACACATGCAAGTCGAACGGTAACAGGTCTTCGGACGCTGACGAGTGGCGAACGGGTGAGTAATACATCGGAACGTGCCCGATCGTGGGGGATAACGAGGCGAAAGCTTTGCTAATACCGCATACGATCTACGGATGAAAGCGGGGGATCTTCGGACCTCGCGCGGACGGAGCGGCCGATGGCAGATTAGGTAGTTGGTGGGATAAAAGCTTACCAAGCCGACGATCTGTAGCTGGTCTGAGAGGATGATCAGCCACACTGGGACTGAGACACGGCCCAG	0	0	0	0	0	0	0	0	0	0	0	0	0	0	0	0	0	0	0	0	0	0	0	0	0	0	0	0	0	0	0	0	0	134	0	0	0	0	0	0	0	0	0	0	0	0	0	0
940	GATGAACGCTAGCTACAGGCTTAACACATGCAAGTCGCAGGGTAACGTGAGGGAAGCTTGCTTCCCTTGACGACGACTGGCGCACGGGTGAGTAACGCGTATTCAACCTTCCCATGACCACGGGATAACCCGTTGAAAGACGGACTAATACCGTATGACGTCGTTTGCTGACATCAAATAACGATTAAAGGTTTAGCGGTGATGGATGGGGATGCGTCTGATTAGCTTGTTGGCGGGGTAACGGCCCACCAAGGCTACGATCAGTAGGGGTTCTGAGAGGAAGGTCCCCCACATTGGAACTGAGACACGGTCCAA	0	0	0	0	0	0	0	0	0	0	0	0	0	0	0	0	0	0	0	0	0	0	0	0	0	0	0	0	0	0	0	0	0	0	0	0	0	0	0	0	0	0	0	0	0	0	0	0
941	ATTGAACGCTGGCGGCATGCCTTACACATGCAAGTCGAACGGCAGCACGGACTTCGGTCTGGTGGCGAGTGGCGAACGGGTGAGTAATATATCGGAACATACCCAGTAGTGGGGGATAACTATCCGAAAGGATAGCTAATACCGCATACGATCTGTGGATGAAAGCAGGGGATCTTCGGACCTTGTGCTATTGGAATGGCCGATATCTGATTAGCTAGTTGGTAGGGTAAAAGCCTACCAAGGCGACGATCAGTAGCTGGTCTGAGAGGACGACCAGCCACACTGGAACTGAGACACGGTCCAG	0	0	0	0	0	0	0	0	0	0	0	0	0	0	0	0	0	0	0	12	0	0	0	0	0	0	0	0	0	0	0	0	0	0	0	0	0	0	0	0	0	0	0	0	0	0	0	0
942	GACGAACGCTGGCGGCATGCCTAATACATGCAAGTCGAACGATGATATCACTGCTTGCAGTGATTGATTAGTGGCGAACGGGTGAGTAACACGTGAGGAACTTGCCCATGAGCGGGGGACAACATTCGGAAACGGATGCTAATACCCCATAGGTGGATTGGTCGCATGACTAATTCATTAAAGGTGGCTCTGCTACCACTCATGGATAGCCTCGCGGCGTATTAGCTAGTTGGTAAGGTAATGGCTTACCAAGGCAGTGATACGTAGCCGACTTGAGAGGGTGATCGGCCACACTGGGACTGAGACACGGCCCAG	0	0	0	0	0	0	0	0	0	0	0	0	0	0	0	0	0	0	0	0	0	0	0	0	0	0	0	0	0	0	0	0	0	0	173	0	0	0	0	0	0	0	0	0	0	0	0	0
943	AATCAACGCTGGCGGCGTGCCTAACACATGCAAGTCGAACGCGAAAGTGGAGCAATCCATGAGTAGCGTGGCAAACGGGTGAGTAACACGTGGGTGACCTGCCTTCGAGTGGGGGATAACGTCCCGAAAGGGACGCTAATACCGCATACGATCCTGCCCTTGAAGGGGTGGCGATCAAAGCCGGGGACCGCAAGGCCTGGCGCTTGAAGAGGGGCCCGCGCCCGATTAGCTAGTTGGTGGGGTAATGGCTCACCAAGGCGACGATCGGTAGCCGGCCTGAGAGGGCGGACGGCCACACTGGGACTGAGACACGGCCCAG	0	0	0	0	0	0	0	0	0	0	0	0	0	0	0	0	0	0	0	0	0	0	0	0	0	0	0	0	0	0	0	0	0	0	0	0	0	0	0	0	0	0	0	0	0	0	0	0
944	GATTAACGCTGGCGGCGTGCATAACACATGCAAGTCGAACGATGAAGATATTTAGATTCCTTCGGGATGAAAAATATTGGATTAGTGGCGGACGGGTGAGTAACGCGTGAGTAACCTGCCTTACACAAGGGGATAGCCGTTGGAAACGACGAATAATACCCTATGATATAAACTCTTCGCATGAAGAGCTTATCAAAGATTTATCGGTGTAAGATGGACTCGCGTCTGATTAGCTAGTTGGTGAGGTAACGGCCCACCAAGGCAACGATCAGTAGCCGGCTTGAGAGAGTGTACGGCCACATTGGGACTGAGACACGGCCCAG	0	0	0	0	0	0	0	0	0	0	0	0	0	0	0	0	0	0	0	0	0	0	0	0	0	0	0	0	0	0	0	0	0	0	0	0	0	0	0	0	0	0	0	0	0	0	0	0
946	GATGAACGCTGGCGGCGTGCTTAACACATGCAAGTCGAACGGGATCCCGGGGGTTCGCTCCCGGGTGAGAGTGGCGAACGGGTGAGTAATGCGTGACCGACCTGCCCCATACACCGGAATAGCTCCTGGAAACGGGTGGTAATGCCGGATGCTCCGGTTGGATGCATGTCCTTCCGGGAAAGATTCTATCGGTATGGGATGGGGTCGCGTCCTATCAGCTTGATGGCGGGGTAACGGCCCACCATGGCTTCGACGGGTAGCCGGCCTGAGAGGGCGACCGGCCACATTGGGACTGAGATACGGCCCAG	0	0	0	0	0	0	0	0	0	0	0	0	0	0	0	0	0	0	0	0	0	0	0	0	0	0	0	0	0	0	0	0	0	0	0	0	15	412	0	0	0	0	0	0	0	0	0	0
947	GACGAACGCTGGCGGCATGCCTAATACATGCAAGTCGAGCGAACCGACGAAGTGCTTGCACTTCTGACGTTAGCGGCGGACGGGTGAGTAACACGTAAGAAACCTACCTATGAGCGGGGGACAACATCCGGAAACGGGTGCTAATACCGCATAGTAATTTGTCAGGCATCTGACAAATTGGAAAGACGGCTTTTGCTGTCACTCATAGATGGTCTTGCGGTGCATTAGCTAGTTGGTGGGATAAAAGCTTACCAAGGCCATGATGCATAGCCGACCTGAGAGGGTAATCGGCCACACTGGGACTGAGACACGGCCCAG	0	0	0	0	0	0	0	0	0	0	0	0	0	0	0	0	0	0	0	0	0	0	0	0	0	0	0	0	0	0	0	0	0	0	0	0	0	0	0	0	0	0	0	0	0	0	0	0
948	AGCGAACGCTGGCGGCATGCTTAACACATGCAAGTCGCACGGTCAGCAATGGCAGTGGCGGACGGGTGAGTAACACGTAGGAATCTATCCCAGGGTGGGGGACAACAGCGGGAAACTGCTGCTAATACCGCATGATACCTGAGGGTCAAAGGCGCAAGTCGCCTTGGGAGGAGCCTGCGTCTGATTAGCTTGTTGGTGGGGTAAAGGCCTACCAAGGCGACGATCAGTAGCTGGTCTGAGAGGATGATCAGCCACATTGGGACTGAGACACGGCCCAA	0	0	0	0	0	0	0	0	0	0	0	0	0	0	0	0	0	0	0	0	0	0	0	0	0	0	0	0	0	0	0	0	0	0	0	0	0	0	0	0	0	0	0	0	0	0	0	0
[truncated: 7,333 more rows]
[truncated: 348 more columns]
