# Supplementary material for: Vaginal and neonatal microbiota in pregnant women with preterm premature rupture of membranes and consecutive early onset neonatal sepsis
Source: BMC Med. 2023 Mar 13;21:92. doi: 10.1186/s12916-023-02805-x (PMC10009945; doi:10.1186/s12916-023-02805-x)
Supplement: Supplementary file 5 — Additional file 5: Table S5. Nucleotide sequences, annotation and relative abundance data of sequence variants determined using Illumina-based amplicon deep-sequencing across kit control samples. [file 12916_2023_2805_MOESM5_ESM.xlsx]

## Sheet: Supplementary Table 5
Supplementary Table 5 Nucleotide sequences, annotation and relative abundance data of sequence variants determined using Illumina-based amplicon deep-sequencing across kit control samples.
		kit0SK2	kit0705	kit2005	kit3108	kitMPkk	kit1112
	count data	1189	2935	7238	1802	5794	22344
	Sequence	rel abundance						Phylum	Class	Order	Family	Genus	Annotation
1	ATTGAACGCTGGCGGCATGCCTTACACATGCAAGTCGAACGGCAGCACGGGAGCAATCCTGGTGGCGAGTGGCGAACGGGTGAGTAATACATCGGAACGTGCCCTGTAGTGGGGGATAACTAGTCGAAAGACTAGCTAATACCGCATACGACCTGAGGGTGAAAGTGGGGGACCGCAAGGCCTCATGCTATAGGAGCGGCCGATGTCTGATTAGCTAGTTGGTGGGGTAAAGGCCTACCAAGGCGACGATCAGTAGCTGGTCTGAGAGGACGATCAGCCACACTGGGACTGAGACACGGCCCAG	0	0	0	24.3618	1.62237	88.1355	Proteobacteria	Betaproteobacteria	Burkholderiales	Burkholderiaceae	Ralstonia	Ralstonia_solanacearum
2	ATTGAACGCTGGCGGCATGCCTTACACATGCAAGTCGAACGGCAGCATGATCTAGCTTGCTAGATTGATGGCGAGTGGCGAACGGGTGAGTAATACATCGGAACGTGCCCTGTAGTGGGGGATAACTAGTCGAAAGATTAGCTAATACCGCATACGACCTGAGGGTGAAAGTGGGGGACCGCAAGGCCTCATGCTATAGGAGCGGCCGATGTCTGATTAGCTAGTTGGTGAGGTAAAGGCTCACCAAGGCGACGATCAGTAGCTGGTCTGAGAGGACGATCAGCCACACTGGGACTGAGACACGGCCCAG	14.8865	4.56559	1.22962	5.82686	9.71695	0.528106	Proteobacteria	Betaproteobacteria	Burkholderiales	Burkholderiaceae	Ralstonia	Ralstonia_pickettii/detusculanense/insidiosa
3	GATGAACGCTGGCGGCATGCTTAACACATGCAAGTCGGACGGGAAACACGGGAAACGGTGTTTCCAGTGGCGGACGGGTGAGTAACGCGTAAGAACCTGCCCTTGGGAGGGGAACAACAGCTGGAAACGGCTGCTAATACCCCGTAGGCTGAGGAGCAAAAGGAGGAATCCGCCCGAGGAGGGGCTCGCGTCTGATTAGCTAGTTGGTGAGGCAATAGCTTACCAAGGCGATGATCAGTAGCTGGTCCGAGAGGATGATCAGCCACACTGGGACTGAGACACGGCCCAG	25.82	0	0	0	0	0	CHLOROPLAST	CHLOROPLAST	CHLOROPLAST	CHLOROPLAST	CHLOROPLAST	CHLOROPLAST
4	ATTGAACGCTGGCGGCATGCCTTACACATGCAAGTCGAACGGCAGCACGGGGGCAACCCTGGTGGCGAGTGGCGAACGGGTGAGTAATACATCGGAACGTGTCCTGTAGTGGGGGATAGCCCGGCGAAAGCCGGATTAATACCGCATACGCTCTACGGAGGAAAGGGGGGGATCTTAGGACCTCCCGCTACAGGGGCGGCCGATGGCAGATTAGCTAGTTGGTGGGGTAAAGGCCTACCAAGGCGACGATCTGTAGCTGGTCTGAGAGGACGACCAGCCACACTGGGACTGAGACACGGCCCAG	4.20521	6.64395	13.5949	0	0	0.299857	Proteobacteria	Betaproteobacteria	Burkholderiales	Burkholderiaceae	Paraburkholderia	Paraburkholderia_sediminocola/fungorum
5	ATTGAACGCTGGCGGCATGCCTTACACATGCAAGTCGAACGGCAGCACGGGAGCAATCCTGGTGGCGAGTGGCGAACGGGTGAGTAATACATCGGAACGTGTCCTGGAGTGGGGGATAGCCCGGCGAAAGCCGGATTAATACCGCATACGCTCTGTGGAGGAAAGGGGGGGATCTTCGGACCTCTCGCTCAAGGGGCGGCCGATGGCAGATTAGCTAGTTGGTGGGGTAAAGGCCTACCAAGGCGACGATCTGTAGCTGGTCTGAGAGGACGACCAGCCACACTGGGACTGAGACACGGCCCAG	5.8032	9.88075	6.09284	0	0	0.107411	Proteobacteria	Betaproteobacteria	Burkholderiales	Burkholderiaceae	Paraburkholderia	Paraburkholderia_caribensis/terricola/sartisoli
6	ATTGAACGCTGGCGGCATGCCTAACACATGCAAGTCGAACGGCAGCACAGTCGTAGCAATACGATGGGTGGCGAGTGGCGGACGGGTGAGGAATACATCGGGACCTGCCCAGACGTGGGGGATAACGTAGGGAAACTTACGCTAATACCGCATACGTCCTACGGGAGAAAGCGGGGGATCGCAAGACCTCGCGCGGTTGGATGGACCGATGTTCGATTAGCTAGTTGGTGAGGTAATGGCTCACCAAGGCGACGATCGATAGCTGGTCTGAGAGGATGATCAGCCACACTGGGACTGAGACACGGCCCAG	0	0	0	0	16.31	0	Proteobacteria	Gammaproteobacteria	Xanthomonadales	Rhodanobacteraceae	Dyella	Dyella
7	ATTGAACGCTGGCGGCATGCCTTACACATGCAAGTCGAACGGCAGCACGGGGGCAACCCTGGTGGCGAGTGGCGAACGGGTGAGTAATACATCGGAACGTGTCCTGGAGTGGGGGATAGCCCGGCGAAAGCCGGATTAATACCGCATACGCTCTGTGGAGGAAAGGGGGGGATCTTCGGACCTCTCGCTCAAGGGGCGGCCGATGGCAGATTAGCTAGTTGGTGGGGTAAAGGCCTACCAAGGCGACGATCTGTAGCTGGTCTGAGAGGACGACCAGCCACACTGGGACTGAGACACGGCCCAG	0	4.25894	10.0304	1.88679	0	0	Proteobacteria	Betaproteobacteria	Burkholderiales	Burkholderiaceae	Paraburkholderia	Paraburkholderia_caribensis/terricola/sartisoli
8	ATTGAACGCTGGCGGCATGCCTAACACATGCAAGTCGAACGGCAGCACAGGTAGCAATACCGGGTGGCGAGTGGCGGACGGGTGAGGAATACATCGGGACCTGCCCAGACGTGGGGGATAACGTAGGGAAACTTACGCTAATACCGCATACGTCCTACGGGAGAAAGCGGGGGATCGCAAGACCTCGCGCGGTTGGATGGACCGATGTTCGATTAGCTAGTTGGTAGGGTAAAAGCCTACCAAGGCGACGATCGATAGCTGGTCTGAGAGGATGATCAGCCACACTGGGACTGAGACACGGCCCAG	0	0	0	0	11.8053	0	Proteobacteria	Gammaproteobacteria	Xanthomonadales	Rhodanobacteraceae	Dyella	Dyella
9	ATTGAACGCTGGCGGCATGCCTTACACATGCAAGTCGGACGGCAGCGCGGGAGCAATCCTGGCGGCGAGTGGCGAACGGGTGAGTAATACATCGGAACATGTCCAGTAGTGGGGGATAGCCCGGCGAAAGCCGGATTAATACCGCATACGATCTATGGATGAAAGCGGGGGATCGCAAGACCTCGCGCTATTGGGGTGGCCGATGGCGGATTAGCTAGTTGGTGGGGTAAAGGCCTACCAAGGCGACGATCCGTAGCTGGTCTGAGAGGACGACCAGCCACACTGGGACTGAGACACGGCCCAG	4.54163	3.06644	0	0	0	0.702649	Proteobacteria	Betaproteobacteria	Burkholderiales	Burkholderiaceae	Paraburkholderia	Paraburkholderia_ferrariae
10	ATTGAACGCTGGCGGCATGCCTTACACATGCAAGTCGAACGGCAGCACGGACTTCGGTCTGGTGGCGAGTGGCGAACGGGTGAGTAATATATCGGAACATACCCAGTAGTGGGGGATAACTATCCGAAAGGATAGCTAATACCGCATACGATCTGTGGATGAAAGCAGGGGATCTTCGGACCTTGTGCTATTGGAATGGCCGATATCTGATTAGCTAGTTGGTAGGGTAAAAGCCTACCAAGGCGACGATCAGTAGCTGGTCTGAGAGGACGACCAGCCACACTGGAACTGAGACACGGTCCAG	7.8217	0	0.373031	0	0	0	Proteobacteria	Betaproteobacteria	Burkholderiales	Oxalobacteraceae	Undibacterium	Undibacterium_oligocarboniphilum
11	GATGAACGCTGGCGGCGTGCTTAACACATGCAAGTCGAACGAAGCGCCTTATTTGATTTTCTTCGGAACTGAAGATTTGGTGACTGAGTGGCGGACGGGTGAGTAACGCGTGGGTAACCTGCCCTGTACAGGGGGATAACAGTCAGAAATGACTGCTAATACCGCATAAGACCACAGCACCGCATGGTGCAGGGGTAAAAACTCCGATGGTACAGGATGGACCCGCGTCTGATTAGCTGGTTGGTGAGGTAACGGCTCACCAAGGCGACGATCAGTAGCCGGCTTGAGAGAGTGAACGGCCACATTGGGACTGAGACACGGCCCAA	7.8217	0	0	0	0	0	Firmicutes	Clostridia	Clostridiales	Lachnospiraceae	Anaerostipes	Anaerostipes
12	GACGAACGCTGGCGGCGTGCCTAATACATGCAAGTAGAACGCTGAAGAGAGGAGCTTGCTCTTCTTGGATGAGTTGCGAACGGGTGAGTAACGCGTAGGTAACCTGCCTTGTAGCGGGGGATAACTATTGGAAACGATAGCTAATACCGCATAACAATGGATGACACATGTCATTTATTTGAAAGGGGCAATTGCTCCACTACAAGATGGACCTGCGTTGTATTAGCTAGTAGGTGAGGTAATGGCTCACCTAGGCGACGATACATAGCCGACCTGAGAGGGTGATCGGCCACACTGGGACTGAGACACGGCCCAG	0	0	0	0	7.42147	0.147691	Firmicutes	Bacilli	Lactobacillales	Streptococcaceae	Streptococcus	Streptococcus_salivarius/vestibularis
13	ATTGAACGCTGGCGGCATGCTTTACACATGCAAGTCGGACGGCAGCACAGAGAAGCTTGCTTCTTGGGTGGCGAGTGGCGAACGGGTGAGTAACATATCGGAACGTACCGAGCAGTGGGGGATAACTAATCGAAAGATTAGCTAATACCGCATATTTTCTGAGGAAGAAAGCAGGGGACCATTTGGCCTTGCGCTGTTTGAGCGGCCGATATCTGATTAGCTAGTTGGTGGGGTAAAGGCCTACCAAGGCGACGATCAGTAGCGGGTCTGAGAGGATGATCCGCCACACTGGGACTGAGACACGGCCCAG	0	0	0	7.38069	0	0	Proteobacteria	Betaproteobacteria	Neisseriales	Neisseriaceae	Neisseria	Neisseria_mucosa/macacae/pharyngis
14	GATAAACGCTGGCGGCGTGCCTAATACATGCAAGTCGAGCGAACAGACGAGGAGCTTGCTCCTCTGACGTTAGCGGCGGACGGGTGAGTAACACGTGGATAACCTACCTATAAGACTGGGATAACTTCGGGAAACCGGAGCTAATACCGGATAATATATTGAACCGCATGGTTCAATAGTGAAAGACGGTTTTGCTGTCACTTATAGATGGATCCGCGCCGCATTAGCTAGTTGGTAAGGTAACGGCTTACCAAGGCAACGATGCGTAGCCGACCTGAGAGGGTGATCGGCCACACTGGAACTGAGACACGGTCCAG	6.13961	0	0	0	0	0	Firmicutes	Bacilli	Bacillales	Staphylococcaceae	Staphylococcus	Staphylococcus_epidermidis
15	AGCGAACGCTGGCGGCAGGCTTAACACATGCAAGTCGAGCGGGCGTAGCAATACGTCAGCGGCAGACGGGTGAGTAACGCGTGGGAACGTACCTTTTGGTTCGGAACAACACAGGGAAACTTGTGCTAATACCGGATAAGCCCTTACGGGGAAAGATTTATCGCCGAAAGATCGGCCCGCGTCTGATTAGCTAGTTGGTAGGGTAATGGCCTACCAAGGCGACGATCAGTAGCTGGTCTGAGAGGATGATCAGCCACATTGGGACTGAGACACGGCCCAA	0	0	1.40923	0	4.0214	0.259578	Proteobacteria	Alphaproteobacteria	Rhizobiales	Bradyrhizobiaceae	Bradyrhizobium	Bradyrhizobium_japonicum/iriomotense/diazoefficiens
16	GATGAACGCTAGCTACAGGCTTAACACATGCAAGTCGAGGGGAAACGGCATTAAGTGCTTGCACTTTTTGGACGTCGACCGGCGCACGGGTGAGTAACGCGTATCCAACCTTCCCATGACTAAGGGATAACCTGCCGAAAGGCAGACTAATACCTTATGGTCTTCACTGACGGCATCAGATGTGAAGTAAAGATTTATCGGTTATGGATGGGGATGCGTCTGATTAGCTTGTTGGCGGGGTAACGGCCCACCAAGGCAACGATCAGTAGGGGTTCTGAGAGGAAGGTCCCCCACATTGGAACTGAGACACGGTCCAA	0	0	5.6231	0	0	0	Bacteroidetes	Bacteroidia	Bacteroidales	Prevotellaceae	Prevotella	Prevotella_histicola
17	ATTGAACGCTGGCGGCATGCTTTACACATGCAAGTCGAACGGCAGCGAGGAGAAGCTTGCTTCTCTGTCGGCGAGTGGCGAACGGGTGAGTATAGCATCGGAACGTGCCAAGTAGTGGGGGATAACCAAACGAAAGTTTGGCTAATACCGCGTAAGCTCCAAGGAGGAAAGTAGGGGACCTAAATAAGGCCTTACGCTATTTGATCGGCCGATGTCGGATTAGCTAGTTGGTGGGGTAATGGCTCACCAAGGCAATGATCCGTAGCGGGTCTGAGAGGACGATCCGCCACACTGGGACTGAGACACGGCCCAG	5.55088	0	0	0	0	0	Proteobacteria	Betaproteobacteria	Neisseriales	Neisseriaceae	unclassified_Neisseriaceae	Neisseriaceae
18	ATTGAACGCTGGCGGCAGGCCTAACACATGCAAGTCGAGCGGTAGAGAGAAGCTTGCTTCTCTTGAGAGCGGCGGACGGGTGAGTAATGCCTAGGAATCTGCCTGGTAGTGGGGGATAACGTCCGGAAACGGACGCTAATACCGCATACGTCCTACGGGAGAAAGCAGGGGACCTTCGGGCCTTGCGCTATCAGATGAGCCTAGGTCGGATTAGCTAGTTGGTGGGGTAATGGCTCACCAAGGCGACGATCCGTAACTGGTCTGAGAGGATGATCAGTCACACTGGAACTGAGACACGGTCCAG	5.55088	0	0	0	0	0	Proteobacteria	Gammaproteobacteria	Pseudomonadales	Pseudomonadaceae	Pseudomonas	Pseudomonas_tolaasii/poae
19	ATTGAACGCTGGCGGCATGCTTAACACATGCAAGTCGAACGGTAACAGGCCTTCGGGCGCTGACGAGTGGCGGACGGGTGAGGAATACGTAGGAATCTGCCTAGTAGTGGGGGGTAACTTAGGGAAACTTAAGCTAATACCGCATACGCCCTACGGGGGAAAGCAGGGGATCGCAAGACCTTGCGCTATTAGATGAGCCTACGTCGGATTAGCTAGTTGGTAGGGTAAAGGCCTACCAAGGCGACGATCCGTAGCTGGTCTGAGAGGACGACCAGCCACACTGGGACTGAGACACGGCCCAG	0.168209	4.32709	0.953302	0	0	0	Proteobacteria	Gammaproteobacteria	unclassified_Gammaproteobacteria	unclassified_Gammaproteobacteria	unclassified_Gammaproteobacteria	Gammaproteobacteria
20	ATTGAACGCTGGCGGAATGCTTTACACATGCAAGTCGAGCGGCAGCGCGGGGCAACCTGGCGGCGAGCGGCGAACGGGTGAGTAATGTATCGGAACGTACCCAGTCGTGGGGGATAACTATCCGAAAGGATAGCTAATACCGCATACGTCCTGAGGGAGAAAGCGGGGGATCGCAAGACCTCGCGCGATTGGAGCGGCCGATATCGGATTAGCTAGTTGGTGAGGTAAAGGCTCACCAAGGCGACGATCCGTAGCTGGTCTGAGAGGACGACCAGCCACACTGGAACTGAGACACGGTCCAG	0	3.10051	2.32108	0	0	0	Proteobacteria	Betaproteobacteria	Nitrosomonadales	Sterolibacteriaceae	Sulfuritalea	Sulfuritalea
21	AGCGAACGCTGGCGGCAGGCTTAACACATGCAAGTCGAGCGGGCCCTTCGGGGTCAGCGGCGGACGGGTGAGTAACGCGTGGGAACGTGCCTTCTGGTTCGGAATAACCCTGGGAAACTAGGGCTAATACCGGATACGCCCTTTTTGGGGAAAGGTTTACTGCCGGAAGATCGGCCCGCGTCTGATTAGCTAGTTGGTGGGGTAACGGCCTACCAAGGCGACGATCAGTAGCTGGTCTGAGAGGATGATCAGCCACACTGGGACTGAGACACGGCCCAG	5.21447	0	0	0	0	0	Proteobacteria	Alphaproteobacteria	Rhizobiales	Methylobacteriaceae	Methylobacterium	Methylobacterium_radiotolerans
22	GATGAATGCTGGCGGCGTGCCTAATACATGCAAGTCGAGCGGTAAGGCCCTTCGGGGTACACGAGCGGCGGACGGCTGAGTAACGCGTGGGAACATGCCCCAAAGTGAGGGATAACGCACCGAAAGGTGTGCTAATACCGCATATGGTCTTCGGATTAAAGGATTTATCCGCTTTGGGAGTGGCCCGCGTACGATTAGATTGTTGGTGAGGTAACGGCTCACCAAGTCGACGATCGTTAACTGGTCTGAGAGGATGATCAGTCAGACTGGAACTGAGACACGGTCCAG	0	0	0	0	5.02244	0	Candidatus_Saccharibacteria	Saccharibacteria_genera_incertae_sedis	Saccharibacteria_genera_incertae_sedis_1	Saccharibacteria_genera_incertae_sedis	Saccharibacteria_genera_incertae_sedis	Saccharibacteria_genera_incertae_sedis
23	ATTGAACGCTGGCGGCATGCCTTACACATGCAAGTCGAACGGCAGCACGGGGGCAACCCTGGTGGCGAGTGGCGAACGGGTGAGTAATACATCGGAACGTGTCCTGTAGTGGGGGATAGCCCGGCGAAAGCCGGATTAATACCGCATACGCTCTACGGAGGAAAGGGGGGGATCTTAGGACCTCCCGCTACAGGGGTGGCCGATGGCAGATTAGCTAGTTGGTGGGGTAAAGGCCTACCAAGGCGACGATCTGTAGCTGGTCTGAGAGGACGACCAGCCACACTGGGACTGAGACACGGCCCAG	0	4.87223	0	0	0	0	Proteobacteria	Betaproteobacteria	Burkholderiales	Burkholderiaceae	Paraburkholderia	Paraburkholderia_sediminocola/fungorum
24	GATGAACGCTGGCGGCGTGCCTAATACATGCAAGTAGAACGCTGAAGGAGGAGCTTGCTCTTCTGGATGAGTTGCGAACGGGTGAGTAACGCGTAGGTAACCTGCCTGGTAGCGGGGGATAACTATTGGAAACGATAGCTAATACCGCATAACAGTAGATGTTGCATGATATCTGCTTGAAAGGGGCAATTGCTCCACTACCAGATGGACCTGCGTTGTATTAGCTAGTTGGTGAGGTAACGGCTCACCAAGGCGACGATACATAGCCGACCTGAGAGGGTGATCGGCCACACTGGGACTGAGACACGGCCCAG	0	0	0	4.60599	0	0	Firmicutes	Bacilli	Lactobacillales	Streptococcaceae	Streptococcus	Streptococcus_australis
25	GACGAACGCTGGCGGCGTGCCTAACACATGCAAGTCGAGCGGGGTCCATCCAGTGCTTGCACTGGGGAAGACCTAGCGGCGAACGGGTGAGTAACACGTGAGGAACCTGCCCCGAAGTCTGGGATAACCCGAGGAAACTCGAGCTAATACCGGATGCCCTCAGTTGATCGCATGGTCGACTGCGGAAAGATTTATCGCTTCGGGAGGGCCTCGCGGCCTATCAGTTTGTTGGTGGGGTAACGGCCTACCAAGACATCGACGGGTAGCTGGTCTGAGAGGACGATCAGCCACACTGGGACTGAGACACGGCCCAG	0	0	0	0	4.50466	0	Actinobacteria	Acidimicrobiia	Acidimicrobiales	Iamiaceae	Actinomarinicola	Actinomarinicola
26	GACGAACGCTGGCGGCGTGCCTAATACATGCAAGTAGAACGCTGAAGGAGGAGCTTGCTTCTCTGGATGAGTTGCGAACGGGTGAGTAACGCGTAGGTAACCTGCCTGGTAGCGGGGGATAACTATTGGAAACGATAGCTAATACCGCATAAGAGTAGATGTTGCATGACATTTGCTTAAAAGGTGCAATTGCATCACTACCAGATGGACCTGCGTTGTATTAGCTAGTTGGTGGGGTAACGGCTCACCAAGGCGACGATACATAGCCGACCTGAGAGGGTGATCGGCCACACTGGGACTGAGACACGGCCCAG	0	0	0	3.88457	0	0	Firmicutes	Bacilli	Lactobacillales	Streptococcaceae	Streptococcus	Streptococcus_mitis_T/pneumoniae_JJA
27	AGCGAACGCTGGCGGCAGGCTTAACACATGCAAGTCGAACGCATCCTTCGGGATGAGTGGCAGACGGGTGAGTAACACGTGGGAACGTGCCCTCCGGTCTGGGATAACCCTGGGAAACTAGGGCTAATACCGGATACGTGCTTTGGCAGAAAGGTTTACTGCCGGAGGATCGGCCCGCGTCTGATTAGCTAGTTGGTGGGGTAACGGCCTACCAAGGCGACGATCAGTAGCTGGTCTGAGAGGATGATCAGCCACACTGGGACTGAGACACGGCCCAG	3.61648	0.238501	0	0	0	0	Proteobacteria	Alphaproteobacteria	Rhizobiales	Methylobacteriaceae	Methylobacterium	Methylobacterium_hispanicum/gregan
28	ATTGAACGCTGGCGGCATGCCTTACACATGCAAGTCGAACGGTAACGCGGGGCAACCTGGCGACGAGTGGCGAACGGGTGAGTAATGTATCGGAACGTGCCCAGTTGTGGGGGATAACTACTCGAAAGAGTGGCTAATACCGCATACGACCTGAGGGTGAAAGCGGGGGATCGCAAGACCTCGCGCAATTGGAGCGGCCGATATCAGATTAGGTAGTTGGTGGGGTAAAGGCCCACCAAGCCAACGATCTGTAGCTGGTCTGAGAGGACGACCAGCCACACTGGGACTGAGACACGGCCCAG	0	0	0	0	3.79703	0	Proteobacteria	Betaproteobacteria	Burkholderiales	Comamonadaceae	unclassified_Comamonadaceae	Comamonadaceae
29	AACGAACGCTGGCGGCAGGCTTAACACATGCAAGTCGAGCGCCCCGCAAGGGGAGCGGCAGACGGGTGAGTAACGCGTGGGAATCTACCCATCTCTACGGAACAACTCCGGGAAACTGGAGCTAATACCGTATACGTCCTTCGGGAGAAAGATTTATCGGAGATGGATGAGCCCGCGTTGGATTAGCTAGTTGGTGGGGTAATGGCCTACCAAGGCGACGATCCATAGCTGGTCTGAGAGGATGATCAGCCACACTGGGACTGAGACACGGCCCAG	0	0	0	0	3.62444	0	Proteobacteria	Alphaproteobacteria	Rhizobiales	Phyllobacteriaceae	Mesorhizobium	Mesorhizobium_amorphae/plurifarium
30	GATGAACGCTGACAGAATGCTTAACACATGCAAGTCTACTTGAATTTGGGTCCTAGACTTAGATTTGGGTGGCGGACGGGTGAGTAACGCGTAAAGAACTTGCCTCACAGTTAGGGACAACATTTGGAAACGAATGCTAATACCTGATATTATGATTATACGGCATCGTATAATCATGAAAGCTATATGCGCTGTGAGAGAGCTTTGCGTCCCATTAGCTAGTTGGAGAGGTAACGGCTCACCAAGGCGATGATGGGTAGCCGGCCTGAGAGGGTGAACGGCCACAAGGGGACTGAGACACGGCCCTT	0	3.20273	0	0	0	0	Fusobacteria	Fusobacteriia	Fusobacteriales	Fusobacteriaceae	Fusobacterium	Fusobacterium_nucleatum
31	ATTGAACGCTGGCGGCATGCCTAACACATGCAAGTCGAACGGCAGCACAGTCGTAGCAATACGATGGGTGGCGAGTGGCGGACGGGTGAGGAATACATCGGGACCTGCCCAGACGTGGGGGATAACGTAGGGAAACTTACGCTAATACCGCATACGTCCTACGGGAGAAAGCGGGGGATCGCAAGACCTCGCGCGGTTGGATGGACCGATGTTCGATTAGCTAGTTGGTGAGGTAATGTCTCACCAAGGCGACGATCGATAGCTGGTCTGAGAGGATGATCAGCCACACTGGGACTGAGACACGGCCCAG	0	0	0	0	3.1757	0	Proteobacteria	Gammaproteobacteria	Xanthomonadales	Rhodanobacteraceae	Dyella	Dyella
32	ATTGAACGCTGGCGGCATGCCTTACACATGCAAGTCGAACGGCAGCGCGGGAGCAATCCTGGCGGCGAGTGGCGAACGGGTGAGTAATGCATCGGAACGTGCCCAGTGGTGGGGGATAGCCCGGCGAAAGCCGGATTAATACCGCATACGACCTGTGGGTGAAAGCGGGGGACCGTAAGGCCTCGCGCCATTGGAGCGGCCGATGTCAGATTAGGTAGTTGGTGGGGTAAAGGCCTACCAAGCCGACGATCTGTAGCTGGTCTGAGAGGACGACCAGCCACACTGGGACTGAGACACGGCCCAG	0	0	0	0	3.14118	0	Proteobacteria	Betaproteobacteria	Burkholderiales	unclassified_Burkholderiales	unclassified_Burkholderiales	Burkholderiales
33	ATTGAACGCTGGCGGCAGGCTTAACACATGCAAGTCGAACGGTAACAGGGATTAGCTTGCTAATTTGCTGACGAGTGGCGGACGGGTGAGTAATGCTTGGGAATCTGGCTTATGGAGGGGGATAACTACGGGAAACTGTAGCTAATACCGCGTAATATCGGAAGATTAAAGGGTGGGACCTTCGGGCCACCTGCCATGAGATGAGCCCAAGTGGGATTAGGTAGTTGGTTAGGTAAAGGCTGACCAAGCCGACGATCTCTAGCTGGTCTGAGAGGATGACCAGCCACACTGGAACTGAGACACGGTCCAG	0	0	0	3.10766	0	0	Proteobacteria	Gammaproteobacteria	Pasteurellales	Pasteurellaceae	Haemophilus	Haemophilus_parahaemolyticus
34	ATTGAACGCTGGCGGCGTGCTTTACACATGCAAGTCGGACGGCAGCATCACTTTCGGGTGGATGGCGAGTGGCGAACGGGTGAGTAATACATCGGGACGTGCCTAATAGTGGGGGATAACTCATCGAAAGATGAGCTAATACCGCATAATCTCTTAAGGAGGAAAGGCGGGGATCTTCGGACCTGTTGCTGTAAGAGCGACCGATGGCCGATTAGCTAGAAGGTGGGGTAAAGGCTTACCTTGGCGATGATCGGTAGCTGTTCTGAGAGGAAGATCAGCCACACTGGGACTGAGACACGGCCCAG	0	0	0	0	3.05488	0	Proteobacteria	Betaproteobacteria	unclassified_Betaproteobacteria	unclassified_Betaproteobacteria	unclassified_Betaproteobacteria	Betaproteobacteria
35	GACGAACGCTGGCGGTATGCCTAATACATGCAAGTCGAACGCTGAAGCACTCTGCTTGCAGAGTGTGGATGAGTGGCGAACGGGTGAGTAACACGTGGGGAACCTGCCCATAAGAGGGGGATAACATCCGGAAACGGGTGCTAATACCGCATAGGTGATCATAGCGCATGCTTAGATCATTAAAGATGGCTTCGGCTATCGCTTATGGATGGCCCCGCGGCGTATTAGCTAGTTGGTGAGGTAATGGCTCACCAAGGCTGTGATACGTAGCCGACCTGAGAGGGTGATCGGCCACACTGGAACTGAGACACGGTCCAG	0	0	0	3.05216	0	0	Firmicutes	Bacilli	Lactobacillales	Carnobacteriaceae	Alkalibacterium	Alkalibacterium
36	AGCGAACGCTGGCGGCAGGCTTAACACATGCAAGTCGAGCGGGCATAGCAATATGTCAGCGGCAGACGGGTGAGTAACGCGTGGGAACGTACCTTTTGGTTCGGAACAACACAGGGAAACTTGTGCTAATACCGGATAAGCCCTTACGGGGAAAGATTTATCGCCGAAAGATCGGCCCGCGTCTGATTAGCTAGTTGGTGAGGTAATGGCTCACCAAGGCGACGATCAGTAGCTGGTCTGAGAGGATGATCAGCCACATTGGGACTGAGACACGGCCCAA	1.26156	0	1.74081	0	0	0	Proteobacteria	Alphaproteobacteria	Rhizobiales	Bradyrhizobiaceae	Bradyrhizobium	Bradyrhizobium_elkanii/pachyrhizi
37	GACGAACGCTGGCGGTGTGCTTCACACATGCAAGTCGAACGAGGTAGCAATACCTAGTGGCGGACGGGTGAGTAACGCGTGGGAATCTGCCTTTAGATGGGGGATAACGGGCCGAAAGGTCCGCTAATACCGCATATGCCGAGAGGTGAAAGGAGTAATCCGTCTAAAGATGAGCCCGCGTCCGATTAGCTAGTTGGTAGAGTAAGAGCCTACCAAGGCGACGATCGGTAGCTGGTCTGAGAGGATGATCAGCCACAATGGGACTGAGACACGGCCCAT	0.841043	0	0	2.10877	0	0	Proteobacteria	Deltaproteobacteria	Bdellovibrionales	Bdellovibrionaceae	Vampirovibrio	Vampirovibrio
38	AATGAACGCTGGCGGCGTGCCTAACACATGCAAGTCGAGCGAGAAAGTCTCTTCGGAGATAAGTACAGCGGCGGACGGGTGAGTAACGCGTGAGAATTTGCCCTTTAGTGAAGAATACCCTTGAGAAATCAGGGTTAATACTGCATACGTCCCTACGGGGAGAAAGGTGGCCTCTTTGCTGCCGCTAAAGGATAAGCTTGCGTACTATTAGCTAGTTGGTGAGGTAAAGGCTCACCAAGGCGATGATGGTTAGCCGGCCTGAGAGGGTGTACGGCCACACTGGAACTTAGACACGGTCCAG	0	0	0	0	2.88229	0	Bacteria	unclassified_Bacteria	unclassified_Bacteria	unclassified_Bacteria	unclassified_Bacteria	Bacteria
39	GATGAACGCTGGCTACAGGCTTAACACATGCAAGTCGAGGGGAAACGACGGGGAAGCTTGCTTCCCCGGGCGTCGACCGGCGCACGGGTGAGTAACGCGTATCCAACCTGCCTCTGACTGAGGGATAACCCGTCGAAAGTCGGCCTAATACCTCATGGCATCGTCTGCGGGCATCCAACGACGATTAAAGATTTCATCGGTCAGGGATGGGGATGCGTCTGATTAGCTTGTTGGCGGGGTAACGGCCCACCAAGGCTACGATCAGTAGGGGTTCTGAGAGGAAGGTCCCCCACATTGGAACTGAGACACGGTCCAA	0	2.48722	0.0828958	0.221976	0	0	Bacteroidetes	Bacteroidia	Bacteroidales	Prevotellaceae	Prevotella	Prevotella_oris
40	GACGAACGCTGGCGGCGTGCTTAACACATGCAAGTCGAACGTGATTTTTGTGGAAATTCTTTCGAGAATGGAAATGAAATGAAAGTGGCGAACGGGTGAGTAACACGTGAGCAACCTACCTTACACAGGGGGATAGCCGTTGGAAACGACGATTAATACCGCATGAGACCACAGAATCGCATGATATAGGGGTCAAAGATTTATCGGTGTAAGAAGGGCTCGCGTCTGATTAGCTAGTTGGAAGGGTAAAGGCCTACCAAGGCGACGATCAGTAGCCGGTCTGAGAGGATGAACGGCCACATTGGAACTGAGACACGGTCCAA	0	2.7598	0	0	0	0	Firmicutes	Clostridia	Clostridiales	Peptoniphilaceae	Parvimonas	Parvimonas
41	AGCGAACGCTGGCGGCATGCCTAACACATGCAAGTCGCACGGGCGTGGGGTTTCGGCCCTGCGTCAGTGGCGGACGGGTGAGTAACGCGTAGGAATCTGTCCATGGGTGGGGGATAACCGCGGGAAACTGCGGCTAATACCGCATGACACCTGAGGGTCAAAGGCGCAAGTCGCCTGTGGAGGAGCCTGCGTCCGATTAGCTGGTTGGTGGGGTAATGGCCTACCAAGGCTGCGATCGGTAGCTGGTCTGAGAGGATGATCAGCCACACTGGGACTGAGACACGGCCCAG	0	0	0	0	2.72696	0	ProteobacteriaAlphaproteobacteria		Rhodospirillales	Acetobacteraceae	unclassified_Acetobacteraceae	Acetobacteraceae
42	ATTGAACGCTGGCGGCATGCCTTACACATGCAAGTCGAACGGCAGCACGGACTTCGGTCTGGTGGCGAGTGGCGAACGGGTGAGTAATACATCGGAACGTGCCCTGTCGTGGGGGATAACTAGTCGAAAGATTAGCTAATACCGCATACGACCTGAGGGTGAAAGCGGGGGACCGTAAGGCCTCGCGCGATAGGAGCGGCCGATGTCTGATTAGCTAGTTGGTGGGGTAAAGGCCCACCAAGGCGACGATCAGTAGCTGGTCTGAGAGGACGATCAGCCACACTGGGACTGAGACACGGCCCAG	0	0	0	2.7192	0	0	Proteobacteria	Betaproteobacteria	Burkholderiales	Burkholderiaceae	Cupriavidus	Cupriavidus_basiliensis/necator
43	ATTGAACGCTGGCGGCATGCCTTACACATGCAAGTCGAACGGTAACAGGTCTTCGGACGCTGACGAGTGGCGAACGGGTGAGTAATACATCGGAACGTGCCCAGTCGTGGGGGATAACTACTCGAAAGAGTAGCTAATACCGCATACGATCTGAGGATGAAAGCGGGGGACCTTCGGGCCTCGCGCGATTGGAGCGGCCGATGGCAGATTAGGTAGTTGGTGGGATAAAAGCTTACCAAGCCGACGATCTGTAGCTGGTCTGAGAGGACGACCAGCCACACTGGGACTGAGACACGGCCCAG	0	0	0	0	2.64066	0	Proteobacteria	Betaproteobacteria	Burkholderiales	Comamonadaceae	Delftia	Delftia_acidovorans/lacustris
44	GACGAACGCTGGCGGCGTGCTTAACACATGCAAGTCGAACGGTAAGGCCCTTTCGGGGGTACACGAGTGGCGAACGGGTGAGTAACACGTGGGTAATCTGCCCTGCACTTCGGGATAAGCCTGGGAAACTGGGTCTAATACCGGATATGAGTCCCGGCCGCATGGTCTGGGGTTGGAAAGTTTTTCGGTGCAGGATGAGCCCGCGGCCTATCAGCTTGTTGGTGGGGTAATGGCCTACCAAGGCGACGACGGGTAGCCGGCCTGAGAGGGTGATCGGCCACACTGGGACTGAGACACGGCCCAG	0	2.35094	0.20724	0	0	0	Actinobacteria	Actinobacteria	Mycobacteriales	Dietziaceae	Dietzia	Dietzia
45	ATTGAACGCTGGCGGCAGGCCTAACACATGCAAGTCGAGCGGTAACAGGAGAAAGCTTGCTTTCTTGCTGACGAGCGGCGGACGGGTGAGTAATGTATGGGGATCTGCCCGATAGAGGGGGATAACTACTGGAAACGGTGGCTAATACCGCATAATGTCTACGGACCAAAGCAGGGGCTCTTCGGACCTTGCACTATCGGATGAACCCATATGGGATTAGCTAGTAGGTGGGGTAAAGGCTCACCTAGGCGACGATCTCTAGCTGGTCTGAGAGGATGATCAGCCACACTGGGACTGAGACACGGCCCAG	0	0	0	2.55272	0	0	Proteobacteria	Gammaproteobacteria	Enterobacterales	Morganellaceae	Proteus	Proteus_mirabilis
46	AGCGAACGCTGGCGGCAGGCTTAACACATGCAAGTCGAGCGGGCCCTTCGGGGTCAGCGGCGGACGGGTGAGTAACGCGTGGGAACGTGCCTTCTGGTTCGGAATAACCCTGGGAAACTAGGGCTAATACCGGATACGCCCTTTTGGGGAAAGGTTTACTGCCGGAAGATCGGCCCGCGTCTGATTAGCTAGTTGGTGGGGTAACGGCCTACCAAGGCGACGATCAGTAGCTGGTCTGAGAGGATGATCAGCCACACTGGGACTGAGACACGGCCCAG	0	0.613288	1.87897	0	0	0	Proteobacteria	Alphaproteobacteria	Rhizobiales	Methylobacteriaceae	Methylobacterium	Methylobacterium_radiotolerans
47	ATTGAACGCTGGCGGCATGCCTTACACATGCAAGTCGAACGGCAGCGGGGGAAAGCTTGCTTTCCTGCCGGCGAGTGGCGAACGGGTGAGTAATACATCGGAACGTGCCCTGTAGTGGGGGATAACTAGTCGAAAGATTAGCTAATACCGCATACGACCTGAGGGTGAAAGTGGGGGACCGCAAGGCCTCATGCTATAGGAGCGGCCGATGTCTGATTAGCTAGTTGGTGGGGTAAAGGCCTACCAAGGCGACGATCAGTAGCTGGTCTGAGAGGACGATCAGCCACACTGGGACTGAGACACGGCCCAG	0	0	0	0	2.41629	0	Proteobacteria	Betaproteobacteria	Burkholderiales	Burkholderiaceae	Ralstonia	Ralstonia_mannitolilytica
48	GATGAACGCTAGCTACAGGCTTAACACATGCAAGTCGAGGGGAAACGGCATTAAGTGCTTGCACTTTTTGGACGTCGACCGGCGCACGGGTGAGTAACGCGTATCCAACCTTCCCATGACTAAGGGATAACCTGCCGAAAGGCAGACTAATACCTTATGGTCTTCACTGACGGCATCAGATGTGAAGTAAAGATTTATCGGTTATGGATGGGGATGCGTCTGATTAGTTAGTTGGCGGGGTAACGGCCCACCAAGGCAACGATCAGTAGGGGTTCTGAGAGGAAGGTCCCCCACATTGGAACTGAGACACGGTCCAA	0	0	2.37635	0	0	0	Bacteroidetes	Bacteroidia	Bacteroidales	Prevotellaceae	Prevotella	Prevotella_histicola
49	GACGAACGCTGGCGGCGTGCTTAACACATGCAAGTCGAACGGAAAGGCCCTGCTTTTGTGGGGTGCTCGAGTGGCGAACGGGTGAGTAACACGTGAGTAACCTGCCCTTGACTTTGGGATAACTTCAGGAAACTGGGGCTAATACCGGATAGGAGCTCCTGCTGCATGGTGGGGGTTGGAAAGTTTCGGCGGTTGGGGATGGACTCGCGGCTTATCAGCTTGTTGGTGGGGTAGTGGCTTACCAAGGCTTTGACGGGTAGCCGGCCTGAGAGGGTGACCGGCCACATTGGGACTGAGATACGGCCCAG	0	0	0.0828958	0	1.57059	0.684748	Actinobacteria	Actinobacteria	Propionibacteriales	Propionibacteriaceae	Cutibacterium	Cutibacterium_acnes
50	GACGAACGCTGGCGGCGTGCCTAATACATGCAAGTAGAACGCTGAAGGAGAAGCTTGCTTCTCTGGATGAGTTGCGAACGGGTGAGTAACGCGTAGGTAACCTGCCTGGTAGCGGGGGATAACTATTGGAAACGATAGCTAATACCGCATAATAGTAGATGTTGCATGACATTTGCTTAAAAGGTGCAATTGCATCACTACCAGATGGACCTGCGTTGTATTAGCTAGTTGGTGAGGTAACGGCTCACCAAGGCGACGATACATAGCCGACCTGAGAGGGTGATCGGCCACACTGGGACTGAGACACGGCCCAG	0	0	0	2.33074	0	0	Firmicutes	Bacilli	Lactobacillales	Streptococcaceae	Streptococcus	Streptococcus_mitis_NJ9705/oralis_ATCC9811
51	GACGAACGCTGGCGGCGTGCCTAACACATGCAAGTCGAGCGGGGTCCAACCAGTGGCAACACTGGGGACGACCTAGCGGCGAACGGGTGAGTAACACGTGAGGAACTTGCCCCGGAGTTCGGGATAACCCGAGGAAACTCGAGCTAATACCGAATGCCCTCTTCTGGTCGCATGGCCGGATGAGGAAAGATTCATCGCTCCGGGAGAGCCTCGCGGCCTATCAGCTAGTTGGTGGGGTAACGGCCCACCAAGGCATCGACGGGTAGCTGGTCTGAGAGGACGATCAGCCACACTGGGACTGAGACACGGCCCAG	0	0	0	0	2.33	0	Actinobacteria	Acidimicrobiia	Acidimicrobiales	Iamiaceae	Actinomarinicola	Actinomarinicola
52	ATTGAACGCTGGCGGCAGGCTTAACACATGCAAGTCGAGCGGTAACAGGGGGTGCTTGCACCCCGCTGACGAGCGGCGGACGGGTGAGTAATGCTTAGGAATCTGCCCAGTAGTGGGGGACAACAGTCGGAAACGGCTGCTAATACCGCATACGCCCTACGGGGGAAAGCAGGGGATCTTCGGACCTTGCGCTATTGGATGAGCCTAAGTCGGATTAGCTAGTTGGTGGGGTAAAGGCCTACCAAGGCGACGATCCGTAGCTGGTCTGAGAGGATGATCAGCCACATCGGGACTGAGACACGGCCCGA	0	2.31687	0	0	0	0	Proteobacteria	Gammaproteobacteria	Alteromonadales	Alteromonadaceae	Marinobacter	Marinobacter_vinifirmus/bacchus
53	GATGAACGCTGACAGAATGCTTAACACATGCAAGTCTACTTGAATTTGGGTTTTTAACTTAGATTTGGGTGGCGGACGGGTGAGTAACGCGTAAAGAACTTGCCTCACAGCTAGGGACAACATTTAGAAATGAATGCTAATACCTAATATTATGATAATAGGGCATCCTATAATTATGAAAGCTATATGCGCTGTGAGAGAGCTTTGCGTCCCATTAGCTAGTTGGAGAGGTAACGGCTCACCAAGGCGATGATGGGTAGCCGGCCTGAGAGGGTGATCGGCCACAAGGGGACTGAGACACGGCCCTT	0	0	2.29345	0	0	0	Fusobacteria	Fusobacteriia	Fusobacteriales	Fusobacteriaceae	Fusobacterium	Fusobacterium_nucleatum
54	GATGAACGCTGGCGGCGTGCCTAATACATGCAAGTCGAGCGAACAGACGAGGAGCTTGCTCCTCTGACGTTAGCGGCGGACGGGTGAGTAACACGTGGATAACCTACCTATAAGACTGGGATAACTTCGGGAAACCGGAGCTAATACCGGATAATATATTGAACCGCATGGTTCAATAGTGAAAGACGGTTTTGCTGTCACTTATAGATGGATCCGCGCCGCATTAGCTAGTTGGTAAGGTAACGGCTTACCAAGGCAACGATGCGTAGCCGACCTGAGAGGGTGATCGGCCACACTGGAACTGAGACACGGTCCAG	0	0	1.20199	0	1.08733	0	Firmicutes	Bacilli	Bacillales	Staphylococcaceae	Staphylococcus	Staphylococcus_epidermidis
55	ATTGAACGCTGGCGGCATGCTTTACACATGCAAGTCGAACGGCAGCGCGGGCTTCGGCCTGGCGGCGAGTGGCGAACGGGTGAGTAATGCATCGGAACGTGCCCAGTAGTGGGGGATAGCCCGGCGAAAGCCGGATTAATACCGCATACGACCTGAGGGTGAAAGCGGGGGACCGAAAGGCCTCGCGCTATTGGAGCGGCCGATGTCGGATTAGCTAGTTGGTGGGGTAAAGGCTTACCAAGGCGACGATCCGTAGCTGGTCTGAGAGGACGACCAGCCACACTGGGACTGAGACACGGCCCAG	0	2.28279	0	0	0	0	Proteobacteria	Betaproteobacteria	Burkholderiales	Comamonadaceae	Schlegelella	Schlegelella_thermodepolymerans
56	GATGAACGCTAGCTATAGGCTTAACACATGCAAGTCGAGGGGAAACGGCATTATGTGCTTGCACATTCTGGACGTCGACCGGCGCACGGGTGAGTATCGCGTATCCAACCTTCCCTCCACTCGGGGATACCCCGTTGAAAGACGGCCTAATACCCGATGTTGTCCACATATGGCATCTGACGTGGACCAAAGATTCATCGGTGGAGGATGGGGATGCGTCTGATTAGCTTGTTGGTGCGGGTAACGGCCCACCAAGGCGACGATCAGTAGGGGTTCTGAGAGGAAGGTCCCCCACATTGGAACTGAGACACGGTCCAA	0	2.28279	0	0	0	0	Bacteroidetes	Bacteroidia	Bacteroidales	Prevotellaceae	Prevotella	Prevotella_intermedia
57	GACGAACGCTGGCGGCGTGCTTAACACATGCAAGTCGAACGGTAAGGCCCCTTCGGGGGTACACGAGTGGCGAACGGGTGAGTAACACGTGAGTAACCTGCCCTTGACTCTGGGATAACATCTGGAAACAGGTGCTAATACCGGATATTCAACCTTTAACTCATGTTTTTGGTTGGAAAGCTCCGGCGGTCATGGATGGACTCGCGGCCTATCAGCTTGTTGGTGAGGTAATGGCTCACCAAGGCTTCGACGGGTAGCCGGCCTGAGAGGGCGACCGGCCACATTGGGACTGAGATACGGCCCAA	0	1.97615	0.303951	0	0	0	Actinobacteria	Actinobacteria	Propionibacteriales	Propionibacteriaceae	Tessaracoccus	Tessaracoccus
58	GATGAACGCTGGCGGCGTGCTTAACACATGCAAGTCGAACGGGATCCATCGGGCTTTGCTTGGTGGTGAGAGTGGCGAACGGGTGAGTAATGCGTGACCGACCTGCCCCATGCACCGGAATAGCTCCTGGAAACGGGTGGTAATGCCGGATGTTCCAGTTGATCGCATGGTCTTCTGGGAAAGCTTTCGCGGTATGGGATGGGGTCGCGTCCTATCAGCTTGACGGCGGGGTAACGGCCCACCGTGGCTTCGACGGGTAGCCGGCCTGAGAGGGCGACCGGCCACATTGGGACTGAGATACGGCCCAG	0	0.272572	1.9895	0	0	0	Actinobacteria	Actinobacteria	Bifidobacteriales	Bifidobacteriaceae	Bifidobacterium	Bifidobacterium_longum
59	ATTGAACGCTGGCGGCATGCCTTACACATGCAAGTCGAACGGCAGCATGATCTAGCTTGCTAGATTGATGGCGAGTGGCGAACGGGTGAGTAATACATCGGAACGTGCCCTGTAGTGGGGGATAACTAGTCGAAAGATTAGCTAATACCGCATACGACCTGAGGGTGAAAGTGGGGGACCGCAAGGCCTCATGCTATAGGAGCGGCCGATGTCTGATTAGCTAGTTGGTGGGGTAAAGGCCCACCAAGGCGACGATCAGTAGCTGGTCTGAGAGGACGATCAGCCACACTGGGACTGAGACACGGCCCAG	0	0	0	0	0	2.26011	Proteobacteria	Betaproteobacteria	Burkholderiales	Burkholderiaceae	Ralstonia	Ralstonia_pickettii/detusculanense/insidiosa
60	GACGAACGCTGGCGGCGTGCCTAATACATGCAAGTAGAACGCTGAAGAGAGGAGCTTGCTCTTCTTGGATGAGTTGCGAACGGGTGAGTAACGCGTAGGTAACCTGCCTTGTAGCGGGGGATAACTATTGGAAACGATAGCTAATACCGCATAACAATGGATGACACATGTCATTTATTTGAAAGGGGCAATTGCTCCACTACAAGATGGACCTGCGTTGTATTAGCTAGTAGGTGAGGTAACGGCTCACCTAGGCGACGATACATAGCCGACCTGAGAGGGTGATCGGCCACACTGGGACTGAGACACGGCCCAG	0	2.21465	0	0	0	0	Firmicutes	Bacilli	Lactobacillales	Streptococcaceae	Streptococcus	Streptococcus_salivarius/vestibularis
61	GATGAACGCTGACAGAATGCTTAACACATGCAAGTCTACTTGAATTTGGGTTTTTTAACTTCGATTTGGGTGGCGGACGGGTGAGTAACGCGTAAAGAACTTGCCTCACAGCTAGGGACAACATTTGGAAACGAATGCTAATACCTAATATTATGATTATAGGGCATCCTAGAATTATGAAAGCTATATGCGCTGTGAGAGAGCTTTGCGTCCCATTAGCTAGTTGGAGAGGTAACGGCTCACCAAGGCAATGATGGGTAGCCGGCCTGAGAGGGTGAACGGCCACAAGGGGACTGAGACACGGCCCTT	0	2.14651	0	0	0	0	Fusobacteria	Fusobacteriia	Fusobacteriales	Fusobacteriaceae	Fusobacterium	Fusobacterium_nucleatum
62	AGTGAACGCTGGCGGCAGGCCTAACACATGCAAGTCGAACGGCAGCACAGTAAGAGCTTGCTCTTATGGGTGGCGAGTGGCGGACGGGTGAGGAATACATCGGAATCTACTCTTTCGTGGGGGATAACGTAGGGAAACTTACGCTAATACCGCATACGACCTACGGGTGAAAGCGGAGGACCTTCGGGCTTCGCGCGATTGAATGAGCCGATGTCGGATTAGCTAGTTGGCGGGGTAAAGGCCCACCAAGGCGACGATCCGTAGCTGGTCTGAGAGGATGATCAGCCACACTGGAACTGAGACACGGTCCAG	0	0	0	2.10877	0	0	Proteobacteria	Gammaproteobacteria	Xanthomonadales	Xanthomonadaceae	Xanthomonas	Xanthomonas
63	GATGAACGCTGGCGGCGTGCCTAATACATGCAAGTAGAACGCTGAAGCTTGGTGCTTGCACCGAGCGGAGGAGTTGCGAACGGGTGAGTAACGCGTAGGTAACCTGCCTCTTAGCGGGGGATAACTATTGGAAACGATAGCTAATACCGCATAAAAGTCGACATTGCATGATGTTGACTTGAAAGGTGCAACTGCATCACTAAGAGATGGACCTGCGTTGTATTAGCTAGTTGGTGAGGTAACGGCTCACCAAGGCGACGATACATAGCCGACCTGAGAGGGTGATCGGCCACACTGGGACTGAGACACGGCCCAG	0	0.340716	1.75463	0	0	0	Firmicutes	Bacilli	Lactobacillales	Streptococcaceae	Streptococcus	Streptococcus_parasanguinis
64	GATGAACGCTGGCGGCGTGCCTAACACATGCAAGTCGAACGGAGATTACGGACGGAAGTTTTCGGATGGAAGTTTGTAATTCTTAGTGGCGGACGGGTGAGTAACGCGTGGGCAACCTGCCCTATACAGGGGGATAGCAGCTGGAAACGGCTGGTAAGACCGCATAAGTCGGTTAAATCGCATGATTTGACCGGGAAATGAGCAATCAGGTATAGGATGGGCCCGCGTCCGATTAGCCAGTTGGCAGGGTAAAAGCCTACCAAAGCGACGATCGGTAGCCGGACTGAGAGGTCGGACGGCCACATTGGGACTGAGACACGGCCCAA	0	0	2.04476	0	0	0	Firmicutes	Clostridia	Clostridiales	Lachnospiraceae	Catonella	Catonella_morbi
65	GACGAACGCTGGCGGCGTGCCTAATACATGCAAGTAGAACGCTGAAGGAGGAGCTTGCTTCTCCGGATGAGTTGCGAACGGGTGAGTAACGCGTAGGTAACCTGCCTGGTAGCGGGGGATAACTATTGGAAACGATAGCTAATACCGCATAAGAGTAGATGTTGCATGACATTTGCTTAAAAGGTGCAATTGCATCACTACCAGATGGACCTGCGTTGTATTAGCTAGTTGGTGGGGTAACGGCTCACCAAGGCGACGATACATAGCCGACCTGAGAGGGTGATCGGCCACACTGGGACTGAGACACGGCCCAG	0	0	1.9895	0	0	0	Firmicutes	Bacilli	Lactobacillales	Streptococcaceae	Streptococcus	Streptococcus_mitis_T/pneumoniae_JJA
66	ATTGAACGCTGGCGGCAGGCTTAACACATGCAAGTCGAACGGTAACAGGGATTAGCTTGCTAATTTGCTGACGAGTGGCGGACGGGTGAGTAATGCTTGGGAATCTGGCTTATGGAGGGGGATAACTACGGGAAACTGTAGCTAATACCGCGTAAAATCTTCGGATTAAAGGGTGGGACTTTCGAGCCACCTGCCATAAGATGAGCCCAAGTGGGATTAGGTAGTTGGTTAGGTAAAGGCTGACCAAGCCGACGATCTCTAGCTGGTCTGAGAGGATGACCAGCCACACTGGAACTGAGACACGGTCCAG	0	0	1.9066	0	0	0	Proteobacteria	Gammaproteobacteria	Pasteurellales	Pasteurellaceae	Haemophilus	Haemophilus_parahaemolyticus
67	ATTGAACGCTGGCGGCAGGCTTAACACATGCAAGTCGAACGGTAACATAAAGAAGCTTGCTTCTTTGATGACGAGTGGCGGACGGGTGAGTAATGCTTGGGAATCTAGCTTATGGAGGGGGATAACTACGGGAAACTGTAGCTAATACCGCGTAGAATCGGGAGATGAAAGTGTGGGACCTTCGGGCCACATGCCATAGGATGAGCCCAAGTGGGATTAGGTAGTTGGTGAGGTAAAGGCTCACCAAGCCGACGATCTCTAGCTGGTCTGAGAGGATGACCAGCCACACTGGGACTGAGACACGGCCCAG	0	0	0	1.7758	0	0	Proteobacteria	Gammaproteobacteria	Pasteurellales	Pasteurellaceae	Haemophilus	Haemophilus_parainfluenzae
68	ATTGAACGCTGGCGGCGTGCCTAACACATGCAAGTCGAGCGGCAGCGCGGGAGCAATCCTGGCGGCGAGCGGCGGACGGGTGAGCAATGCTTGGGAATCTGCCCATCAGTGGGGGACAACCCGGGGAAACTCGGGCTAATACCGCATACGTTCTGAGGAAGAAAGCAGGGGATCGCAAGACCTTGCGCTGATGGATGAGCCCAAGTCGGATTAGCTAGTTGGTGAGGTAACGGCTCACCAAGGCGACGATCCGTAGCTGGTCTGAGAGGACGACCAGCCACACCGGAACTGAGACACGGTCCGG	0	0	0	0	1.6914	0	Proteobacteria	Gammaproteobacteria	Nevskiales	Steroidobacteraceae	unclassified_Steroidobacteraceae	Steroidobacteraceae
69	GATGAACGCTGACAGAATGCTTAACACATGCAAGTCTACTTGAATTTGGGTTTTTAACTTAGGTTTGGGTGGCGGACGGGTGAGTAACGCGTAAAGAACTTGCCTCACAGCTAGGGACAACATTTAGAAATGAATGCTAATACCTAATATTATGATAATAGGGCATCCTATAATTATGAAAGCTATATGCGCTGTGAGAGAGCTTTGCGTCCCATTAGCTAGTTGGAGAGGTAACGGCTCACCAAGGCGATGATGGGTAGCCGGCCTGAGAGGGTGATCGGCCACAAGGGGACTGAGACACGGCCCTT	0	0	1.6441	0	0	0	Fusobacteria	Fusobacteriia	Fusobacteriales	Fusobacteriaceae	Fusobacterium	Fusobacterium_nucleatum
70	GATGAACGCTGACAGAATGCTTAACACATGCAAGTCTACTTGAATTTGGGTCCTAGACTTAGATTTGGGTGGCGGACGGGTGAGTAACGCGTAAAGAACTTGCCTCACAGTTAGGGACAACATTTGGAAACGAATGCTAATACCTGATATTATGATTTTAGGGCATCCTAAGATTATGAAAGCTATATGCGCTGTGAGAGAGCTTTGCGTCCCATTAGCTAGTTGGAGAGGTAACGGCTCACCAAGGCGATGATGGGTAGCCGGCCTGAGAGGGTGAACGGCCACAAGGGGACTGAGACACGGCCCTT	0	1.60136	0	0	0	0	Fusobacteria	Fusobacteriia	Fusobacteriales	Fusobacteriaceae	Fusobacterium	Fusobacterium_peridonticum
71	GATGAACGCTAGCGATAGGCTTAACACATGCAAGTCGAGGGGCAGCATTATTTTAGCTTGCTAAGATAGATGGCGACCGGCGCACGGGTGCGTAACGCGTATGCAACCTGCCTGTAATTAGGGAATAACCCGGTGAAAGTCGGACTAATACCCTATATTCTTCTTTCTCCGCATGGAGGAGGACGGAAAGATTTATTGATTACAGATGGGCATGCGTCCCATTAGCTAGTTGGTAAGGTAACGGCTTACCAAGGCAACGATGGGTAGGGGGACTGAGAGGTTGACCCCCCACACTGGTACTGAGACACGGACCAG	0	1.60136	0	0	0	0	Bacteroidetes	Bacteroidia	Bacteroidales	Porphyromonadaceae	Porphyromonas	Porphyromonas_endodontalis
72	GATGAACGCTAGCTACAGGCTTAACACATGCAAGTCGAGGGGAAACGGCATTGAGTGCTTGCACTCTTTGGACGTCGACCGGCGCACGGGTGAGTAACGCGTATCCAACCTTCCCATTACTGTGGGATAACCTGCCGAAAGGCAGACTAATACCGCATAGTCTTCGATGACGGCATCAGATTTGAAGTAAAGATTTATCGGTAATGGATGGGGATGCGTCTGATTAGCTTGTTGGCGGGGTAACGGCCCACCAAGGCTACGATCAGTAGGGGTTCTGAGAGGAAGGTCCCCCACATTGGAACTGAGACACGGTCCAA	0	1.60136	0	0	0	0	Bacteroidetes	Bacteroidia	Bacteroidales	Prevotellaceae	Prevotella	Prevotella_melaninogenica
73	GACGAACGCTGGCGGCGTGCTTAACACATGCAAGTCGAACGAAGAGCGATGGAAGCTTGCTTCTATCAATCTTAGTGGCGAACGGGTGAGTAACGCGTAATCAACCTGCCCTTCAGAGGGGGACAACAGTTGGAAACGACTGCTAATACCGCATACGATCTAACCTCGGCATCGAGGATGGATGAAAGGTGGCCTCTATTTATAAGCTATCACTGAAGGAGGGGATTGCGTCTGATTAGCTAGTTGGAGGGGTAACGGCCCACCAAGGCGATGATCAGTAGCCGGTCTGAGAGGATGAACGGCCACATTGGGACTGAGACACGGCCCAG	0	1.60136	0	0	0	0	Firmicutes	Negativicutes	Veillonellales	Veillonellaceae	Veillonella	Veillonella_parvula/dispar
74	ATTGAACGCTGGCGGCATGCCTTACACATGCAAGTCGGACGGCAGCGCGGGCTTCGGCCTGGCGGCGAGTGGCGAACGGGTGAGTAATACATCGGAACGTGTCCAGTAGTGGGGGATAGCCCGGCGAAAGCCGGATTAATACCGCATACGATCTGTGGATGAAAGCGGGGGACCTTCGGGCCTCGCGCTACAGGGGCGGCCGATGGCAGATTAGGTAGTTGGTGGGGTAAAGGCCTACCAAGCCGACGATCTGTAGCTGGTCTGAGAGGACGACCAGCCACACTGGGACTGAGACACGGCCCAG	0	1.26065	0	0	0.120815	0.210347	Proteobacteria	Betaproteobacteria	Burkholderiales	Burkholderiaceae	Paraburkholderia	Paraburkholderia
75	AGCGAACGCTGGCGGCAGGCTTAACACATGCAAGTCGAGCGCCGTAGCAATACGGAGCGGCAGACGGGAGAGTAACACGTGGGAACGTGCCTTTTGGTTCGGAACAACTGAGGGAAACTTCAGCTAATACCGGATAAGCCCTTACGGGGAAAGATTTATCGCCAAAAGATCGGCCCGCGTCTGATTAGCTAGTTGGTGGGGTAATGGCCCACCAAGGCGACGATCAGTAGCTGGTCTGAGAGGATGATCAGCCTCACTGGGACTGAGACACGGCCCAG	0	0	0	1.55383	0	0	Proteobacteria	Alphaproteobacteria	Rhizobiales	Bradyrhizobiaceae	unclassified_Bradyrhizobiaceae	Bradyrhizobiaceae
76	GATGAACGCTGACAGAATGCTTAACACATGCAAGTCAACTTGAACTTCGGTTTGGGTGGCGGACGGGTGAGTAACGCGTAAAGAACTTGCCTCACAGATAGGGACAACATTTGGAAACGAATGCTAATACCTGATATTATGATTTTAGGGCATCCTAGGATTATGAAAGCTATATGCGCTGTGAGAGAGCTTTGCGTCCCATTAGCTAGTTGGAGAGGTAACGGCTCACCAAGGCGATGATGGGTAGCCGGCCTGAGAGGGTGATCGGCCACAAGGGGACTGAGACACGGCCCTT	0	0	0	1.55383	0	0	Fusobacteria	Fusobacteriia	Fusobacteriales	Fusobacteriaceae	Fusobacterium	Fusobacterium_nucleatum_supsp._polymorphum
77	GATGAACGCTGGCTACAGGCTTAACACATGCAAGTCGAGGGGCAGCATGGGGTTTGCTTGCAAACCCCGATGGCGACCGGCGCACGGGTGAGTAACGCGTATCCAACCTTCCCGCGACTCGGGTATAACCTGCCGAAAGGCAGACTAATCCCCGATGTCCTCCACTTTGGACATCTTTTGTGGAGCAAAGGCTTCGGCCGGTTGCGGATGGGGATGCGTCCGATTAGCTTGTTGGCGGGGCAATGGCCCACCAAGGCTTCGATCGGTAGGGGTTCTGAGAGGAAGGCCCCCCACATTGGAACTGAGACACGGTCCAA	0	1.53322	0	0	0	0	Bacteroidetes	Bacteroidia	Bacteroidales	Prevotellaceae	Prevotella	Prevotella_baroniae
78	GATGAACGCTAGCGGCAGGCCTAACACATGCAAGTCGAGGGGTAGAGTTAGCTTGCTAACTTGAGACCGGCGCACGGGTGCGTAACGCGTATGCAATCTACCTTATACTGAGGGATAGCCCGGAGAAATCCGGATTAATACCTTATAGTATATTAAAGTGGCATCATTTTGATATTAAAGATTTATTGGTATAAGATGAGCATGCGTCCCATTAGTTAGTTGGTGTGGTAACGGCACACCAAGACGATGATGGGTAGGGGTCCTGAGAGGGAGATCCCCCACACTGGTACTGAGACACGGACCAG	0	1.22658	0.276319	0	0	0	Bacteroidetes	Flavobacteriia	Flavobacteriales	Flavobacteriaceae	Myroides	Myroides
79	ATTGAAAGCTGGCGGCATGCCTTACACATGCAAGTCGAACGGCAGCACGGGGGCAACCCTGGTGGCGAGTGGCGAACGGGTGAGTAATACATCGGAACGTGTCCTGTAGTGGGGGATAGCCCGGCGAAAGCCGGATTAATACCGCATACGCTCTACGGAGGAAAGGGGGGGATCTTAGGACCTCCCGCTACAGGGGCGGCCGATGGCAGATTAGCTAGTTGGTGGGGTAAAGGCCTACCAAGGCGACGATCTGTAGCTGGTCTGAGAGGACGACCAGCCACACTGGGACTGAGACACGGCCCAG	0	0	0	1.49834	0	0	Proteobacteria	Betaproteobacteria	Burkholderiales	Burkholderiaceae	Paraburkholderia	Paraburkholderia_sediminocola/fungorum
80	ATTGAACGCTGGCGGCAGGCTTAACACATGCAAGTCGAACGGTAACATAAAGAAGCTTGCTTCTTTGATGACGAGTGGCGGACGGGTGAGTAATGCTTGGGAATCTAGCTTATGGAGGGGGATAACTATGGGAAACTGTAGCTAATACCGCGTAGAATCGGGAGATGAAAGTGTGGGACCTTCGGGCCACATGCCATAGGATGAGCCCAAGTGGGATTAGGTAGTTGGTGAGGTAAAGGCTCACCAAGCCGACGATCTCTAGCTGGTCTGAGAGGATGACCAGCCACACTGGGACTGAGACACGGCCCAG	0	0	0	1.49834	0	0	Proteobacteria	Gammaproteobacteria	Pasteurellales	Pasteurellaceae	Haemophilus	Haemophilus_parainfluenzae
81	ATTGAACGCTGGCGGCATGCTTTACACATGCAAGTCGGACGGCAGCACGGAGAAGCTTGCTTCTTGGGTGGCGAGTGGCGAACGGGTGAGTAACATATCGGAACGTACCGAGCAGTGGGGGATAACTAATCGAAAGATTAGCTAATACCGCATATTTTCTGAGGAAGAAAGCAGGGGACCATTTGGCCTTGCGCTGTTTGAGCGGCCGATATCTGATTAGCTAGTTGGTGGGGTAAAGGCCTACCAAGGCGACGATCAGTAGCGGGTCTGAGAGGATGATCCGCCACACTGGGACTGAGACACGGCCCAG	0	1.46508	0	0	0	0	Proteobacteria	Betaproteobacteria	Neisseriales	Neisseriaceae	Neisseria	Neisseria_mucosa/macacae/pharyngis
82	GATGAACGCTAGCTACAGGCTTAACACATGCAAGTCGAGGGGAAACGACATTGAAGCTTGCTTCGATGGGCGTCGACCGGCGCACGGGTGAGTAACGCGTATCCAACCTGCCTCTGACTAAGGGATAACCCGGCGAAAGTCGGACTAATACCTTATGAGGTTTTCTGCAGACATCTAATGAAAACGAAAGATTTATCGGTCAGCGATGGGGATGCGTCTGATTAGCTTGTTGGCGGGGTAACGGCCCACCAAGGCAACGATCAGTAGGGGTTCTGAGAGGAAGGTCCCCCACATTGGAACTGAGACACGGTCCAA	0	0	1.45068	0	0	0	Bacteroidetes	Bacteroidia	Bacteroidales	Prevotellaceae	Prevotella	Prevotella
83	GACGAACGCTGGCGGCGTGCTTAACACATGCAAGTCGAACGAAGAGCGATGGAAGCTTGCTTCTATCAATCTTAGTGGCGAACGGGTGAGTAACGCGTAATCAACCTGCCCTTCAGAGGGGGACAACAGTTGGAAACGACTGCTAATACCGCATACGATCCAACCTCGGCATCGAGGATGGATGAAAGGTGGCCTCTATTTATAAGCTATCACTGAAGGAGGGGATTGCGTCTGATTAGCTAGTTGGAGGGGTAACGGCCCACCAAGGCAATGATCAGTAGCCGGTCTGAGAGGATGAACGGCCACATTGGGACTGAGACACGGCCCAG	0	0	0	1.44284	0	0	Firmicutes	Negativicutes	Veillonellales	Veillonellaceae	Veillonella	Veillonella_parvula/dispar
84	GACGAACGCTGGCGGCGTGCCTAATACATGCAAGTCGTACGCATTGATGATGGAACTTGTTCCATCGGACGTGAGTGGCGCACGGGTGAGTAACACGTGGGAAACCTACCCTTCAGCGGGGGATAACCGTCGGAAACGATGGCTAATACCGCATAGGTCTTTGAGTCACCTGACTTAAAGAGGAAAGACGGCTTCGGCTGTCACTGAAGGATGGTCCCGCGGTGCATTAGCTAGTTGGTAAGGTAATGGCTTACCAAGGCAATGATGCATAGCCGACCTGAGAGGGTGATCGGCCACATTGGGACTGAGACACGGCCCAA	0	1.39693	0	0	0	0	Firmicutes	Bacilli	Lactobacillales	Aerococcaceae	Facklamia	Facklamia
85	ATTGAACGCTGGCGGCATGCCTTACACATGCAAGTCGAACGGCAGCATGATCTAGCTTGCTAGATTGATGGCGAGTGGCGAACGGGTGAGTAATACATCGGAACGTGCCCTGTAGTGGGGGATAACTAGTCGAAAGATTAGCTAATACCGCATACGACCTGAGGGTGAAAGTGGGGGACCGCAAGGCCTCATGCTATAGGAGCGGCCGATGTCTGATTAGATAGTTGGTGAGGTAAAGGCTCACCAAGGCGACGATCAGTAGCTGGTCTGAGAGGACGATCAGCCACACTGGGACTGAGACACGGCCCAG	0	1.39693	0	0	0	0	Proteobacteria	Betaproteobacteria	Burkholderiales	Burkholderiaceae	Ralstonia	Ralstonia_pickettii/detusculanense/insidiosa
86	GACGAACGCTGGCGGCGTGCTTAACACATGCAAGTCGAACGCTGAAGCTCAGCTTTTGTTGGGTGGATGAGTGGCGAACGGGTGAGTAACACGTGAGTAACCTGCCCTCTTCTTTGGGATAACGCCCGGAAACGGGTGCTAATACTGGATATTCACTGATCTTCGCATGGGGGTTGGTGGAAAGGTTTGTTCTGGTGGGGGATGGGCTCGCGGCCTATCAGCTTGTTGGTGGGGTGATGGCCTACCAAGGCTTTGACGGGTAGCCGGCCTGAGAGGGTGACCGGTCACATTGGGACTGAGATACGGCCCAG	0	0	1.39541	0	0	0	Actinobacteria	Actinobacteria	Actinomycetales	Actinomycetaceae	Schaalia	Schaalia
87	GACGAACGCTGGCGGCGTGCTTAACACATGCAAGTCGAACGAAGAACGATGGAAGCTTGCTTCTATCAATCTTAGTGGCGAACGGGTGAGTAACGCGTAATCAACCTGCCCTTCAGAGGGGGACAACAGTTGGAAACGACTGCTAATACCGCATACGATCCAATCTCGGCATCGAGACTGGATGAAAGGTGGCCTCTATTCATAAGCTATCACTGAAGGAGGGGATTGCGTCTGATTAGCTAGTTGGAGGGGTAACGGCCCACCAAGGCGATGATCAGTAGCCGGTCTGAGAGGATGAACGGCCACATTGGGACTGAGACACGGCCCAG	0	0	1.39541	0	0	0	Firmicutes	Negativicutes	Veillonellales	Veillonellaceae	Veillonella	Veillonella_atypica
88	GACGAACGCTGGCGGCGTGCCTAATACATGCAAGTCGAGCGAACCGACGAGGTGCTTGCACCTTTGACGTTAGCGGCGAACGGGTGAGTAACACGTAAGGAATCTACCTATAAGTGGGGGATAACATCCGGAAACGGGTGCTAATACCGCATAATAACCGACACCACATGGTGTAAGTTTGAAAGATGGCTCTGCTGTCACTTATAGATGACCTTGCGGTGCATTAGCTAGTTGGTGGGGTAATAGCCTACCAAGGCCATGATGCATAGCCGACCTGAGAGGGTGATCGGCCACATTGGGACTGAGACACGGCCCAA	0	1.29472	0.0967118	0	0	0	Firmicutes	Bacilli	Lactobacillales	Aerococcaceae	Aerococcus	Aerococcus_suis
89	GACGAACGCTGGCGGCGTGCCTAATACATGCAAGTCGAACGAGAGCGACTGGTGCTTGCACTGGTCAATCTAGTGGCGAACGGGTGAGTAACACGTGGGTAACCTGCCCATCAGAGGGGGATAACATCCGGAAACGGATGCTAAAACCGCATAGGTCTTCGAACCGCATGGTTTGAAGAGGAAAAGAGGCGCAAGCTTCTGCTGATGGATGGACCCGCGGTGCATTAGCTAGTTGGTGAGGTAACGGCTCACCAAGGCCGTGATGCATAGCCGACCTGAGAGGGTGATCGGCCACATTGGGACTGAGACACGGCCCAA	0	0	0	1.38735	0	0	Firmicutes	Bacilli	Lactobacillales	Carnobacteriaceae	Granulicatella	Granulicatella_adiacens/paraadiacens
90	ATTGAACGCTGGCGGCATGCTTTACACATGCAAGTCGGACGGCAGCACAGAGAAGCTTGCTTCTTGGGTGGCGAGTGGCGAACGGGTGAGTAACATATCGGAACGTACCGAGTAGTGGGGGATAACTGATCGAAAGATCAGCTAATACCGCATACGTCTTGAGAGGGAAAGCAGGGGACCTTCGGGCCTTGCGCTATTCGAGCGGCCGATATCTGATTAGCTAGTTGGTGGGGTAAAGGCCTACCAAGGCGACGATCAGTAGCGGGTCTGAGAGGATGATCCGCCACACTGGGACTGAGACACGGCCCAG	0	1.36286	0	0	0	0	Proteobacteria	Betaproteobacteria	Neisseriales	Neisseriaceae	Neisseria	Neisseria_meningitis/lactamica/cinerea/polysaccharea
91	ATTGAACGCTGGCGGCATGCCTTACACATGCAAGTCGAACGGCAGCACGGGGGCAACCCTGGTGGCGAGTGGCGAACGGGTGAGTAATACATCGGAACGTGTCCAGTAGTGGGGGATAGCCCGGCGAAAGCCGGATTAATACCGCATACGATCTTAGGATGAAAGCGGGGGACCGAAAGGCCTCGCGCTATTGGGGCGGCCGATGGCGGATTAGCTAGTTGGTGGGGTAAAGGCTCACCAAGGCGACGATCCGTAGCTGGTCTGAGAGGACGACCAGCCACACTGGGACTGAGACACGGCCCAG	0	0	0	0	0	1.33369	Proteobacteria	Betaproteobacteria	Burkholderiales	Burkholderiaceae	Paraburkholderia	Paraburkholderia
92	GACGAACGCTGGCGGCGTGCCTAATACATGCAAGTAGAACGCTGAAGGAGGAGCTTGCTTCTCTGGATGAGTTGCGAACGGGTGAGTAACGCGTAGGTAACCTGCCTGGTAGCGGGGGATAACTATTGGAAACGATAGCTAATACCGCATAAGAGTAGATGTTGCATGACATTTGCTTAAAAGGTGCAATTGCATCACTACCAGATGGACCTGCGTTGTATTAGCTAGTTGGTGAGGTAACGGCTCACCAAGGCAACGATACATAGCCGACCTGAGAGGGTGATCGGCCACACTGGGACTGAGACACGGCCCAG	0	0	0	1.33185	0	0	Firmicutes	Bacilli	Lactobacillales	Streptococcaceae	Streptococcus	Streptococcus_mitis_NJ9705/oralis_ATCC9811
93	GATGAACGCTAGCTACAGGCTTAACACATGCAAGTCGAGGGGCAGCGCAGTGTAGCAATACACGGGCGGCGACCGGCGCACGGGTGCGTAACGCGTATCCAACCTGCCCTTCTCATTGGGATAGCCTTTCGAAAGAGAGATTAATACCGAATAACATAGTTTGATTGCCTGATTATACTATGAAAGCTCCGGCGGAGAAGGATGGGGATGCGTTCCATTAGGTAGTAGGCGGGGTAACGGCCCACCTAGCCTACGATGGATAGGGGTTCTGAGAGGAAGGTCCCCCACACTGGAACTGAGACACGGTCCAG	0	1.22658	0	0	0	0	Bacteroidetes	Bacteroidia	Bacteroidales	Bacteroidaceae	unclassified_Bacteroidaceae	Bacteroidaceae
94	GATGAACGCTAGCGGCAGGCCTAACACATGCAAGTCGAGGGGCAGCGAGAATGAAGCTTGCTTCATTTGTCGGCGACCGGCGCACGGGTGCGTAACGCGTATGTAACCTACCTTAAACAGGGGCATAACACCGAGAAATTGGTACTAATTCCCCATAACACTTTAGGAGGCATCTCCTGGAGTTGAAAGTTCCGGCGGTTTAAGATGGACATGCGTTGTATTAGATAGTTGGTGAGGTAACGGCTCACCAAGTCGACGATACATAGGGGGACTGAGAGGTTAACCCCCCACATTGGTACTGAGACACGGACCAA	0	1.15843	0	0	0	0	Bacteroidetes	Bacteroidia	Bacteroidales	Rikenellaceae	Alistipes	Alistipes
95	GACGAACGCTGGCGGCGTGCTTAACACATGCAAGTCGAACGGTGAAGGGACCGGTTTTTGCTGGTTCTGGATGAGTGGCGAACGGGTGAGTAACACGTGAGTAACCTGCCCCCTTCTTCTGGATAACCGCATGAAAGTGTGGCTAATACGGGATATTCTGCGCCTGCTGCATGGTGGGTGTGGGAAAGATATTGTTTCGGTGGGGGATGGGCTCGCGGCCTATCAGCTTGTTGGTGGGGTGATGGCCTACCAAGGCGGTGACGGGTAGCCGGCCTGAGAGGGTGGACGGTCACACTGGGACTGAGACACGGCCCAG	0	0	0	1.10988	0	0	Actinobacteria	Actinobacteria	Actinomycetales	Actinomycetaceae	Actinomyces	Actinomyces
96	GACGAACGCTGGCGGCGTGCTTAACACATGCAAGTCGAACGATGAAGCGGTGCTTGCACCGTGGATTAGTGGCGAACGGGTGAGTAATACGTGAGTGACCTACCTTTGACTCTGGGATAAGCCTGGGAAACTGGGTCTAATACCGGATACGACCAATCTCTGCATGGGGTGTTGGTGGAAAGCGTTATGGAGTGGTTTTAGATGGGCTCACGGCCTATCAGCTTGTTGGTGAGGTAATGGCTTACCAAGGCGACGACGGGTAGCCGGCCTGAGAGGGTGACCGGCCACACTGGGACTGAGACACGGCCCAG	0	0	0	1.10988	0	0	Actinobacteria	Actinobacteria	Micrococcales	Micrococcaceae	Rothia	Rothia_aeria
97	GACGAACGCTGGCGGCGTGCCTAATACATGCAAGTAGAACGCTGAAGAGAGGAGCTTGCTCTTCTTGGATGAGTTGCGAACGGGTGAGTAACGCGTAGGTAACCTGCCTGGTAGCGGGGGATAACTATTGGAAACGATAGCTAATACCGCATAAAATTGATTATTGCATGATAATTAATTGAAAGATGCAATTGCATCACTACCAGATGGACCTGCGTTGTATTAGCTAGTTGGTGAGGTAACGGCTCACCAAGGCGACGATACATAGCCGACCTGAGAGGGTGATCGGCCACACTGGGACTGAGACACGGCCCAG	0	0	0	1.10988	0	0	Firmicutes	Bacilli	Lactobacillales	Streptococcaceae	Streptococcus	Streptococcus_sanguinis
98	GATGAACGCTAGCGGCAGGCTTAATACATGCAAGTCGAGGGGCAGCACAGTATAGCAATATATGGGTGGCGACCGGCAAACGGGTGCGGAACACGTACACAACCTTCCGATAAGAGGGGGATAGCCCAGAGAAATTTGGATTAATACCCCGTAAGATAAAGTTCAGGCATCTGGATTTTATGATAGGCGCGAGCCGCTTATTGATGGGTGTGCGTCTGATTAGGTAGTTGGCGGGGTAAAGGCCCACCAAGCCTACGATCAGTAGCTGATGTGAGAGCATGATCAGCCACACGGGCACTGAGACACGGGCCCG	0	0	0	0	1.10459	0	Bacteroidetes	Chitinophagia	Chitinophagales	Chitinophagaceae	Hydrotalea	Hydrotalea
99	GATGAACGCTGGCGGCGTGCCTAACACATGCAAGTCGAGCGATTCTCTTCGGAGAAGAGCGGCGGACGGGTGAGTAACGCGTGGGTAACCTGCCCTGTACACACGGATAACATACCGAAAGGTATGCTAATACGAGATAATATGCTTTTATCGCATGGTAGAAGTATCAAAGCTCCGGCGGTACAGGATGGACCCGCGTCTGATTAGCTAGTTGGTGAGGTAACGGCTCACCAAGGCGACGATCAGTAGCCGACCTGAGAGGGTGATCGGCCACATTGGAACTGAGACACGGTCCAA	0	0.681431	0.400663	0	0	0	Firmicutes	Clostridia	Clostridiales	Peptostreptococcaceae	Romboutsia	Romboutsia
100	GATGAACGCTAGCGATAGGCTTAACACATGCAAGTCGAGGGGCAGCATTATTTTAGCTTGCTAAGATAGATGGCGACCGGCGCACGGGTGCGTAACGCGTATGCAACCTGCCTGTAATTAGGGAATAACCCGGTGAAAGTCGGACTAATACCCTATATTCTTCTTTTTCCGCATGGAGAAGGACGGAAAGATTTATTGATTACAGATGGGCATGCGTCCCATTAGCTCGTTGGTAAGGTAACGGCTTACCAAGGCAACGATGGGTAGGGGGACTGAGAGGTTGACCCCCCACACTGGTACTGAGACACGGACCAG	0	0	1.07765	0	0	0	Bacteroidetes	Bacteroidia	Bacteroidales	Porphyromonadaceae	Porphyromonas	Porphyromonas
101	GATGAACGCTAGCTACAGGCTTAACACATGCAAGTCGAGGGGAAACGGCATTTAGTGCTTGCACCGAATGGACGTCGACCGGCGCACGGGTGAGTAACGCGTATCCAACCTTCCCATAACTAAGGGATAACCTGCCGAAAGGCAGACTAATACCTTATGTAATCCTTTGATGGCATCAGATAAGGATAAAAGATTTATCGGTTATGGATGGGGATGCGTCTGATTAGCTTGTTGGCGGGGTAACGGCCCACCAAGGCAACGATCAGTAGGGGTTCTGAGAGGAAGGTCCCCCACATTGGAACTGAGACACGGTCCAA	0	0	1.06383	0	0	0	Bacteroidetes	Bacteroidia	Bacteroidales	Prevotellaceae	Prevotella	Prevotella
102	GATGAACGCTGGCGGCGTGCTTAACACATGCAAGTCGAACGATGAAGCCCAGCTTGCTGGGTGGATTAGTGGCGAACGGGTGAGTAACACGTGAGTAACCTGCCCCCGACTCTGGGATAAGCCCGGGAAACTGGGTCTAATACCGGATATTACCTCTTGCCGCATGGCAGGTGGTGGAAAGATTTATCGGTTGGGGATGGACTCGCGGCCTATCAGCTTGTTGGTGAGGTAATGGCTCACCAAGGCGACGACGGGTAGCCGGCCTGAGAGGGTGACCGGCCACACTGGGACTGAGACACGGCCCAG	0	1.05622	0	0	0	0	Actinobacteria	Actinobacteria	Micrococcales	Micrococcaceae	Glutamicibacter	Glutamicibacter_nicotianae/arilaitensis
103	GATGAACGCTAGCTACAGGCTTAACACATGCAAGTCGAGGGGAAACGGCATTGAGTGCTTGCACTCTTTGGACGTCGACCGGCGCACGGGTGAGTAACGCGTATCCAACCTTCCCATTACTGTGGGATAACCTGCCGAAAGGCAGACTAATACCGCATAGTCTTCGATGACGGCATCAGATTTGAAGTAAAGATTTATCGGTAATGGATGGGGATGCGTCTGATTAGCTTGTTGGCGGGGTAACGGCCCACCAAGGCAACGATCAGTAGGGGTTCTGAGAGGAAGGTCCCCCACATTGGAACTGAGACACGGTCCAA	0	0	0.773694	0.277469	0	0	Bacteroidetes	Bacteroidia	Bacteroidales	Prevotellaceae	Prevotella	Prevotella_melaninogenica/scopos
104	GATGAACGCTGGCGGCGCGCCTAACACATGCAAGTCGAACGGCACCCACCTTCGGGTGGAAGCGAGTGGCGAACGGCTGAGTAACACGTGGAGAACCTGCCCCCTCCCCCGGGATAGCCGCCCGAAAGGACGGGTAATACCGGATACCCCCGGGCGCCGCATGGCGCCCGGGCTAAAGCCCCGACGGGAGGGGATGGCTCCGCGGCCCATCAGGTAGACGGCGGGGTGACGGCCCACCGTGCCGACAACGGGTAGCCGGGTTGAGAGACCGACCGGCCAGATTGGGACTGAGACACGGCCCAG	0	0	1.05001	0	0	0	Actinobacteria	Coriobacteriia	Coriobacteriales	Coriobacteriaceae	Collinsella	Collinsella_aerofaciens
105	GATGAACGCTGGCGGCGTGCTTAACACATGCAAGTCGAACGAAGCTGTTGTTTGGAGACCTTCGGGTGGAAGAATAACAGACTGAGTGGCGGACGGGTGAGTAACGCGTGGGTAACCTACCTTGCACAGGGGGACAACAGTTGGAAACGACTGCTAATACCGCATAAGACCACAGTACCGCATGGTACAGGGGTAAAAACTGAGGTGGTGCAAGATGGACCCGCGTCTGATTAGCTAGTTGGTGGGGTAAAGGCCTACCAAGGCGACGATCAGTAGCCGACCTGAGAGGGTGATCGGCCACATTGGGACTGAGACACGGCCCAA	0	0	1.02238	0	0	0	Firmicutes	Clostridia	Clostridiales	Lachnospiraceae	unclassified_Lachnospiraceae	Lachnospiraceae
106	GATGAACGCTAGCGGCAGGCCTAACACATGCAAGTCGAGGGAGAAGCCCTTCGGGGCAGAAACCGGCGCACGGGTGCGTAACGCGTATGCAACCTACCTTTCACAGGGGGATAGCCCGAAGAAATTTGGATTAATACCCCATAATATTATTGGATGGCATCATTTGATAATTAAAATTACGATGGTGAAAGATGGGCATGCGTCCTATTAGCTAGTTGGAGTGGTAACGGCACCCCAAGGCTACGATAGGTAGGGGTCCTGAGAGGGAGATCCCCCACACTGGTACTGAGACAGGGACCAG	0	0	0	0.99889	0	0	Bacteroidetes	Flavobacteriia	Flavobacteriales	Flavobacteriaceae	Capnocytophaga	Capnocytophaga_granulosa
107	GATGAACGCTAGCGGGAGGCCTAACACATGCAAGCCGAGCGGTAGAATTCTTTCGGGAATTTGAGAGCGGCGTACGGGTGAGGAACACGTGTGCAACCTGCCTTTATCTGGGAGATAGCCTTTCGAAAGGAAGATTAATATCCCATAATATATTGATTGGCATCGATTAATATTGAAAGCTCCGGCGGATAGAGATGGGCACGCGCAAGATTAGATAGTTGGTGAGGTAACGGCTCACCAAGTCTACGATCTTTAGGGGGCCTGAGAGGGTGATCCCCCACACTGGTACTGAGACACGGACCAG	0	0.988075	0	0	0	0	Bacteroidetes	Flavobacteriia	Flavobacteriales	Weeksellaceae	Chryseobacterium	Chryseobacterium
108	AACGAACGCTGGCGGCAGGCTTAACACATGCAAGTCGAACGCGTGTAGCAATACACGAGTGGCGCACGGGTGAGTAACGCGTGGATATCTGCCTTTTGGTTCGGAATAACCCCGGGAAACTGGGGCTAATACCGGATGGTTCCTTCGGGATAAAGATTTATCGCCAAAAGATGAGTCCGCGTACGATTAGCTAGTTGGTGAGGTAATGGCTCACCAAGGCGACGATCGTTAGCTGGTCTGAGAGGACGATCAGCCACACTGGGACTGAGACACGGCCCAG	0	0	0	0	0	0.957752	Proteobacteria	Alphaproteobacteria	Rhodospirillales	Reyranellaceae	Reyranella	Reyranella
109	GACGAACGCTGGCGGCGTGCTTAACACATGCAAGTCGAACGATGATGCGGTGCGTGCACCGTTGATTAGTGGCGAACGGGTGAGTAACACGTGAGTAACCTGCCCTCTTCTTTGGGATAACGGTCTGAAAGGGCTGCTAATACTGAATATTCACATGTCTTCGCATGGGGGTGTGTGGAAAGAGATGCTTTTGGGTGTTTTTGGTGGGGGATGGGCTCGCGGCCTATCAGCTTGTTGGTGGGGTAGTGGCCTACCAAGGCTTTGACGGGTAACCGGCCTGAGAGGGTGACCGGTCACATTGGGACTGAGATACGGCCCAG	0	0	0.953302	0	0	0	Actinobacteria	Actinobacteria	Actinomycetales	Actinomycetaceae	Schaalia	Schaalia_cardiffensis
110	GACGAACGCTGGCGGCGTGCTTAACACATGCAAGTCGAACGATGAAGCCCAGCTTGCTGGGTGGATTAGTGGCGAACGGGTGAGTAACACGTGAGTAACCTGCCCTTCACTCTGGGATAACTCCGGGAAACCGGTGCTAATACTGGATATGACTACTCCCCGCATGGGGTGGTGGTGGAAAGTTTTTCGGTGGAGGATGGACTCGCGGCCTATCAGCTTGTTGGTGGGGTAATGGCCTACCAAGGCGACGACGGGTAGCCGGCCTGAGAGGGCGACCGGCCACACTGGGACTGAGACACGGCCCAG	0	0.783646	0.165792	0	0	0	Actinobacteria	Actinobacteria	Micrococcales	Intrasporangiaceae	Ornithinimicrobium	Ornithinimicrobium
111	GACGAACGCTGGCGGCGTGCCTAATACATGCAAGTCGAACGCTTCTTTTTCACCGAACTTCGGTTCATCGAAAAAGAGGAGTGGCGAACGGGTGAGTAACACGTGGGTAACCTGCCCATCAGAAGGGGATAACACTTGGAAACAGGTGCTAATACCGTATAATGCTTTTTCTCGCATGAGAGCAAGCTGAAAGGCGCTTTTGCGTCACTGATGGATGGACCCGCGGTGCATTAGCTAGTTGGTGAGGTAACGGCTCACCAAGGCCACGATGCATAGCCGACCTGAGAGGGTGATCGGCCACACTGGGACTGAGACACGGCCCAG	0	0	0	0.943396	0	0	Firmicutes	Bacilli	Lactobacillales	Enterococcaceae	Enterococcus	Enterococcus
112	GATGAACGCTGGCGGCGTGCTTAACACATGCAAGTCGAACGATGAAGCCTGGTGCTTGCACCGGGTGGATTAGTGGCGAACGGGTGAGTATCACGTGAGTAACCTACCCTTGACTCTGGGATAAGCCCGGGAAACTGGGTCTAATACCGGATATGACCAGTCACCGCATGGTGTGCTGGTGGAAAGCTTTAGCGGTTTTGGATGGACTCGCGGCCTATCAGCTAGACGGTGAGGTAATGGCTCACCGTGGCGATGACGGGTAGCCGGCCTGAGAGGGTGACCGGCCACACTGGGACTGAGACACGGCCCAG	0	0	0	0.943396	0	0	Actinobacteria	Actinobacteria	Micrococcales	Micrococcaceae	Nesterenkonia	Nesterenkonia
113	ATTGAACGCTGGCGGCATGCCTTACACATGCAAGTCGAACGGTAACAGGTTAAGCTGACGAGTGGCGAACGGGTGAGTAATATATCGGAACGTGCCCAGTCGTGGGGGATAACTGCTCGAAAGAGCAGCTAATACCGCATACGACCTGAGGGTGAAAGCGGGGGATCGCAAGACCTCGCGCGATTGGAGCGGCCGATATCAGATTAGGTAGTTGGTGGGGTAAAGGCCCACCAAGCCAACGATCTGTAGCTGGTCTGAGAGGACGACCAGCCACACTGGGACTGAGACACGGCCCAG	0	0	0.939486	0	0	0	Proteobacteria	Betaproteobacteria	Burkholderiales	Comamonadaceae	Pelomonas	Pelomonas_saccharophila
114	GATGAACGCTGGCGGCGTGCCTAATACATGCAAGTCGAGCGAATGGATTAAGAGCTTGCTCTTATGAAGTTAGCGGCGGACGGGTGAGTAACACGTGGGTAACCTGCCCATAAGACTGGGATAACTCCGGGAAACCGGGGCTAATACCGGATAATATTTTGAACTGCATGGTTCGAAATTGAAAGGCGGCTTCGGCTGTCACTTATGGATGGACCCGCGTCGCATTAGCTAGTTGGTGAGGTAACGGCTCACCAAGGCAACGATGCGTAGCCGACCTGAGAGGGTGATCGGCCACACTGGGACTGAGACACGGCCCAG	0	0	0	0	0.931999	0	Firmicutes	Bacilli	Bacillales	Bacillaceae1	Bacillus	Bacillus_thuringensis/cereus/weihenstephanensis
115	GACGAGCGCTGGCGGCGTGCTTAACACATGCAAGTCGAGCGGGATCCCTGGTGCTTGCACTGGGGTGAGAGCGGCGAACGGGTGAGTAATGCGTGACTGACCTGCCCTGAGGTCTGGAATAGCTCCTGGAAACGGGTGGTAATGCCGGATGTTCCACACTGCTGCATGGTGGTGTGGGAAAACTTTGGTGCCTTGGGATGGGGTCGCGTCCTATCAGGTAGTCGGTGGGGTAGTGGCCTACCGAGCCTACGACGGGTAGCCGGCCTGAGAGGGTGACCGGCCACATTGGGACTGAGATACGGCCCAG	0	0	0.898038	0	0	0	Actinobacteria	Actinobacteria	Bifidobacteriales	Bifidobacteriaceae	Aeriscardovia	Aeriscardovia
116	GACGAACGCTGGCGGCGTGCCTAATACATGCAAGTCGAGCGAAGTTTTTCTGGTGCTTGCACCGGAAAAACTTAGCGGCGAACGGGTGAGTAACACGTAAAGAACCTGCCTCATAGACTGGGACAACTATTGGAAACGATAGCTAATACCGGATAACAGCATTAACTGCATGGTTGATGTTTAAAAGTTGGTTTTGCTAACACTATGAGATGGCTTTGCGGTGCATTAGCTAGTTGGTGGGGTAAAGGCCTACCAAGGCGACGATGCATAGCCGACCTGAGAGGGTGATCGGCCACACTGGGACTGAGACACGGCCCAG	0	0	0	0.887902	0	0	Firmicutes	Bacilli	Bacillales	Bacillales_Incertae_Sedis_XI	Gemella	Gemella_haemolysans
117	GATGAACGCTGGCGGCGTGCCTAACACATGCAAGTCGAACGGAACTGCTTTTGAAGATTCCTTCGGGATGATTCAGTTGTAGTTTAGTGGCGGACGGGTGAGTAACGCGTGAGTAACCTGCCCTTCAGAGGGGGATAACGATCTGAAAAGACCGCTAATACCGCATAACATTACGAAGTCGCATGGCTTTGTAATCAAAACTCAGGTGCTGAAGGATGGACTCGCGTCCGATTAGTTAGTTGGTGAGGTAACGGCCCACCAAGACCGCGATCGGTAGCCGGACTGAGAGGTTGAACGGCCACATTGGGACTGAGACACGGCCCAG	0	0.88586	0	0	0	0	Firmicutes	Clostridia	Clostridiales	Ruminococcaceae	unclassified_Ruminococcaceae	Ruminococcaceae
118	AACGAACGCTGGCGGCAGGCCTAACACATGCAAGTCGAGCGAACCCTTCGGGGTTAGCGGCGGACGGGTGAGTAACGCGTGGGAATATGCCCTTCTCTACGGAATAGTCTCGGGAAACTGGGGGTAATACCGTATACGCCCTTTGGGGGAAAGATTTATCGGAGAAGGATTAGCCCGCGTTGGATTAGGTAGTTGGTGGGGTAATGGCCTACCAAGCCTACGATCCATAGCTGGTTTGAGAGGATGATCAGCCACACTGGGACTGAGACACGGCCCAG	0	0.851789	0	0	0	0	Proteobacteria	Alphaproteobacteria	Rhodobacterales	Rhodobacteraceae	Paracoccus	Paracoccus_alcaliphilus
119	GACGAACGCTGGCGGCGTGCCTAATACATGCAAGTCGTACGCTTCTTTTTCCACCGGAGCTTGCTCCACCGGAAAAAGAGGAGTGGCGAACGGGTGAGTAACACGTGGGTAACCTGCCCATCAGAAGGGGATAACACTTGGAAACAGGTGCTAATACCGTATAACAATCGAAACCGCATGGTTTTGATTTGAAAGGCGCTTTCGGGTGTCGCTGATGGATGGACCCGCGGTGCATTAGCTAGTTGGTGAGGTAACGGCTCACCAAGGCCACGATGCATAGCCGACCTGAGAGGGTGATCGGCCACATTGGGACTGAGACACGGCCCAA	0	0	0.842774	0	0	0	Firmicutes	Bacilli	Lactobacillales	Enterococcaceae	Enterococcus	Enterococcus_faecium/hirae/durans/lactis
120	GATGAACGCTAGCGAAATGCCTAACACATGCAAGTCGAACGGATCTTGCCTCGTAGTAATACGGAGTAAGATTAGTGGCAAACGAGCGAGTAACGCGTGCTTAACCTGCCCCGAAGATGGGTATAACTGCAGAGATGTAGCTAATTCCCAATATGCTCACGATGGTGAAATTCCAATGTGAGGAAAGATTTATCGCTTCGGGAGGGGGGTGCGTCCTATCAGGTAGTTGGTGGGGTAATGGCCTACCAAGCCTATGACGGGTAACCGGTCTGAGATGATGTCCGGTCGCGATGGGACTGAGATACGGCCCAT	0	0	0.842774	0	0	0	SR1	SR1_genera_incertae_sedis	SR1_genera_incertae_sedis	SR1_genera_incertae_sedis	SR1_genera_incertae_sedis	SR1_genera_incertae_sedis
121	GACGAACGCTGGCGGCGTGCTTAACACATGCAAGTCGAACGGGCCTTGCTTCTTTTTTTGGGGGTGGGGTTAGTGGCGAACGGGTGAGTAACACGTGAGTAACCTGCCCCTCACTTCTGGATAACCGCTTGAAAGGGTGGCTAATACGGGGTGTTCTGGCCTGCTCGCATGGGTGGGTTTGGAAAGATTCGACCGGTTTTGGTTGTTTTGGTGGGGGATGGGCTCGCGGCCTATCAGCTTGTTGGTGGGGTGATGGCCTGCCAAGGCTTTGACGGGTAGCCGGCCTGAGAGGGTGGGCGGTCACACTGGGACTGAGACACGGCCCAG	0	0	0	0.832408	0	0	Actinobacteria	Actinobacteria	Actinomycetales	Actinomycetaceae	Actinomyces	Actinomyces_massiliensis
122	GACGAACGCTGGCGGCGTGCTTAACACATGCAAGTCGAACGGTAAGGCCCTTTCGGGGGTACACGAGTGGCGAACGGGTGAGTAACACGTGAGTAACCTGCCCTAAACTTTGGGATAACTCCTGGAAACAGGTGCTAATACCGGATATGAACTTCTGCCGCATGGTGGGGGTTGGAAAGCTCCGGCGGTTTAGGATGGACTCGCGGCCTATCAGCTTGTTGGTGAGGTAGTGGCTCACCAAGGCTTCGACGGGTAGCCGGCCTGAGAGGGCGACCGGCCACATTGGGACTGAGATACGGCCCAA	0	0	0	0.832408	0	0	Actinobacteria	Actinobacteria	Propionibacteriales	Propionibacteriaceae	Tessaracoccus	Tessaracoccus
123	GACGAACGCTGGCGGCGTGCTTAACACATGCAAGTCGAACGAAGAGCGATGGAAGCTTGCTTCTATCAATCTTAGTGGCGAACGGGTGAGTAACGCGTAATCAACCTGCCCTTCAGAGGGGGACAACAGTTGGAAACGACTGCTAATACCGCATACGATCTAATCTCGGCATCGAGGATAGATGAAAGGTGGCCTCTACATGTAAGCTATCACTGAAGGAGGGGATTGCGTCTGATTAGCTAGTTGGAGGGGTAACGGCCCACCAAGGCGATGATCAGTAGCCGGTCTGAGAGGATGAACGGCCACATTGGGACTGAGACACGGCCCAG	0	0	0	0.832408	0	0	Firmicutes	Negativicutes	Veillonellales	Veillonellaceae	Veillonella	Veillonella_parvula/dispar
124	GATGAACGCTAGCGACAGGCCTAACACATGCAAGTCGAGGGGCAGCGAAGAGGTAGCAATACCTTTGTCGGCGACCGGCGCACGGGTGAGTAACACGTATGCAATCCACCTGTAACAGGGGGATAACCCGGAGAAATCCGGACTAATACCCCATAATATGGGCGCTCCGCATGGAGAGCCCATTAAAGAGAGCAATTTTGGTTACAGACGAGCATGCGCTCCATTAGCCAGTTGGCGGGGTAACGGCCCACCAAAGCGACGATGGATAGGGGTTCTGAGAGGAAGGTCCCCCACATTGGAACTGAGACACGGTCCAA	0	0	0.828958	0	0	0	Bacteroidetes	Bacteroidia	Bacteroidales	Barnesiellaceae	Barnesiella	Barnesiella
125	GACGAACGCTGGCGGCATGCCTAATACATGCAAGTCGAGCGAACAGATGAAGTGCTTGCACTTCTGACGTTAGCGGCGAACGGGTGAGTAACACGTAAGGAATCTACCTATAAGCGGGGGATAACATTCGGAAACGGGTGCTAATACCGCATAATATCTTCTTCCGCATGGAAGAAGATTGAAAGACGGCTCTGCTGTCACTTATAGATGACCTTGCGGTGCATTAGTTAGTTGGTGGGGTAACGGCCTACCAAGACGATGATGCATAGCCGACCTGAGAGGGTGATCGGCCACATTGGGACTGAGACACGGCCCAA	0	0.477002	0.345399	0	0	0	Firmicutes	Bacilli	Lactobacillales	Aerococcaceae	Aerococcus	Aerococcus_viridans/urinaeequi
126	GACAAACGCTGGCGGCGTGCCTAACACATGCAAGTCGAACGCTCGCTTCTCTTACGGGAGGAGCGGGAGTGGCGGACGGGTGAGGAACACGTGGATGACCTTCCCTCCAGTGAGGGATACCGGCGAGAAATCGCCGACAATACCGCATAGGCTCCGCTTTGTGAGGAAGGGGAGCAAAGCCGGAAGGCGCTGGAGGATGGGTCTGCGTCCGATTAGCTAGCTGGTGGGGTAATGGCTCACCAGGGCGACGATCGGTAGCTGGTCTGAGAGGATGATCAGCCACACTGGGATTGAGAACGGCCCAG	0	0	0	0	0.793925	0	Chloroflexi	Ktedonobacteria	Ktedonobacterales	Thermosporotrichaceae	Thermosporothrix	Thermosporothrix
127	GACGAACGCTGGCGGCGTGCCTAATACATGCAAGTAGAACGCTGAAGGAGGAGCTTGCTTCTCCGGATGAGTTGCGAACGGGTGAGTAACGCGTAGGTAACCTGCCTGGTAGCGGGGGATAACTATTGGAAACGATAGCTAATACCGCATAACAGTAGATATTGCATGATATCTGCTTGAAAGGTGCAATTGCATCACTACCAGATGGACCTGCGTTGTATTAGCTAGTTGGTGAGGTAACGGCTCACCAAGGCGACGATACATAGCCGACCTGAGAGGGTGATCGGCCACACTGGGACTGAGACACGGCCCAG	0	0	0	0.776915	0	0	Firmicutes	Bacilli	Lactobacillales	Streptococcaceae	Streptococcus	Streptococcus_oralis_ATCC700233
128	GATGAACGCTAGCGATAGGCTTAACACATGCAAGTCGAGGGGCAGCATTATTTTAGCTTGCTAAGATAGATGGCGACCGGCGCACGGGTGCGTAACGCGTATGCAACCTGCCTGTAATTAGGGAATAACCCGGTGAAAGTCGGACTAATACCCTATATTCTTCTTTCTCCGCATGGGGGAGGACGGAAAGATTTATTGATTACAGATGGGCATGCGTCCCATTAGCTAGTTGGTAAGGTAACGGCTTACCAAGGCAACGATGGGTAGGGGGACTGAGAGGTTGACCCCCCACACTGGTACTGAGACACGGACCAG	0	0	0.759878	0	0	0	Bacteroidetes	Bacteroidia	Bacteroidales	Porphyromonadaceae	Porphyromonas	Porphyromonas_endodontalis
129	GATGAACGCTGGCGGCGTGCCTAACACATGCAAGTCGAGCGAAGCGCTGTTTTCAGAATCTTCGGAGGAAGAGGACAGTGACTGAGCGGCGGACGGGTGAGTAACGCGTGGGCAACCTGCCTCATACAGGGGGATAACAGTTAGAAATGACTGCTAATACCGCATAAGCGCACAGGACCGCATGGTGTAGTGTGAAAAACTCCGGTGGTATGAGATGGACCCTCGTCTGATTAGGTAGTTGGTGGGGTAAAGGCCTACCAAGCCGACGATCAGTAGCCGACCTGAGAGGGTGACCGGCCACATTGGGACTGAGACACGGCCCAA	0	0	0.746062	0	0	0	Firmicutes	Clostridia	Clostridiales	Lachnospiraceae	Sellimonas	Sellimonas
130	GACGAACGCTGGCGGCGTGCTTAACACATGCAAGTCGAACGGACTGCTTGGGGGCTTGCTCCTGGGTGGTGAGTGGCGAACGGGTGAGTAACACGTGAGTAACCTGCCCTCTTCTTTGGGATAACGGCCGGAAACGGCTGCTAATACCGGGTAGTCACTGGTCTCCGCATGGGGGTTGGTGGAAAGGGGCCCTTTTTGGGTTTCTGGTGGGGGATGGGCTCGCGGCTTATCAGCTTGTTGGTGGGGTGATGGCTCACCAAGGCTTTGACGGGTAGCCGGCCTGAGAGGGTGACCGGTCACATTGGGACTGAGATACGGCCCAG	0	0	0	0.721421	0	0	Actinobacteria	Actinobacteria	Actinomycetales	Actinomycetaceae	Schaalia	Schaalia_polynesiensis
131	ATTGAACGCTGGCGGCAGGCTTAACACATGCAAGTCGAGCGGAAACGATGATAGCTTGCTATCAGGCGTCGAGCGGCGGACGGGTGAGTAATACTTAGGAATCTACCTAGTAGTGGGGGATAGCTCGGGGAAACTCGAATTAATACCGCATACGACCTACGGGAGAAAGGGGGCAACTTGTTGCTCTCGCTATTAGATGAGCCTAAGTCGGATTAGCTAGATGGTGGGGTAAAGGCCTACCATGGCGACGATCTGTAGCTGGTCTGAGAGGATGATCAGCCACACCGGGACTGAGACACGGCCCGG	0	0.715503	0	0	0	0	Proteobacteria	Gammaproteobacteria	Pseudomonadales	Moraxellaceae	Psychrobacter	Psychrobacter_aquaticus/maritimus
132	GATGAACGCTGGCGGCGTGCTTAACACATGCAAGTCGAACGATGAAGCCCAGCTTGCTGGGCGGATTAGTGGCGAACGGGTGAGTAACACGTGAGTAACCTGCCCTTGACTCTGGGATAAGCCCGGGAAACTGGGTCTAATACCGGATAGGAGCGCCTGTCGCATGACGGGTGTTGGAAAGATTTTTCGGTCATGGATGGACTCGCGGCCTATCAGCTTGTTGGTGAGGTAATGGCTCACCAAGGCGACGACGGGTAGCCGGCCTGAGAGGGTGACCGGCCACACTGGGACTGAGACACGGCCCAG	0.58873	0	0	0	0	0.120838	Actinobacteria	Actinobacteria	Micrococcales	Micrococcaceae	Micrococcus	Micrococcus
133	GACGAACGCTGGCGGCATGCCTAATACATGCAAGTCGAGCGAACGGATGAGAAGCTTGCTTCTCTGATGTTAGCGGCGGATGGGTGAGTAACACGTGGGCAACCTGCCCTGCAGATGGGGATAACTCCGGGAAACCGGGGCTAATACCGAATAATCAGTTGGTTCGCATGAACCAACTCTGAAAGACGGTTTCGGCTGTCACTGCAGGATGGGCCCGCGGCGCATTAGCTAGTTGGTGGGGTAATGGCCTACCAAGGCGACGATGCGTAGCCGACCTGAGAGGGTGATCGGCCACACTGGGACTGAGACACGGCCCAG	0	0.681431	0	0	0	0	Firmicutes	Bacilli	Bacillales	Planococcaceae	Sporosarcina	Sporosarcina
134	GATGAACGCTGGCGGCGTGCTTAACACATGCAAGTCGAACGATGAAGCCCAGCTTGCTGGGTGGATTAGTGGCGAACGGGTGAGTAACACGTGAGTAACCTGCCCCCGACTCTGGGATAAGCCCGGGAAACTGGGTCTAATACCGGATATTACCTCTTGCCGCATGGCAGGTGGTGGAAAGATTTATCGGTGGGGGATGGACTCGCGGCCTATCAGCTTGTTGGTGAGGTAATGGCTCACCAAGGCGACGACGGGTAGCCGGCCTGAGAGGGTGACCGGCCACACTGGGACTGAGACACGGCCCAG	0	0	0.676983	0	0	0	Actinobacteria	Actinobacteria	Micrococcales	Micrococcaceae	Glutamicibacter	Glutamicibacter_nicotianae/arilaitensis
135	AATCAACGCTGGCGGCGTGCCTAACACATGCAAGTCGAACGAGAAAGTGGAGCAATCCATGAGTAAAGTGGCGACCGGGTGAGTAACACGTGACTAACCTACCTTCGAGTGGGGAATAACTCCGGGAAACCGGGGCTAATACCGCATAACACCGCAAGGTCAAAGCAGCAATGCGCTTGAAGAGGGGGTCGCGGCTGATTAGCTAGTTGGCGGGGTAACGGCCCACCAAGGCGAAGATCGTTATCCGGCCTGAGAGGGCGCACGGACACACTGGAACTGAAACACGGTCCAG	0	0	0	0	0.621332	0	Acidobacteria	Acidobacteria_Gp1	Gp1	Gp1	Gp1	Acidobacteria Gp1
136	GACGAACGCTGGCGGCGTGCCTAATACATGCAAGTAGAACGCTGAAGGAGGAGCTTGCTCTTCTGGATGAGTTGCGAACGGGTGAGTAACGCGTAGGTAACCTGCCTGGTAGCGGGGGATAACTATTGGAAACGATAGCTAATACCGCATAACAGTAGATGTTGCATGACATTTGCTTAAAAGGTGCAATTGCATCACTACCAGATGGACCTGCGTTGTATTAGCTAGTTGGTGGGGTAACGGCTCACCAAGGCGACGATACATAGCCGACCTGAGAGGGTGATCGGCCACACTGGGACTGAGACACGGCCCAG	0	0	0.594087	0	0	0	Firmicutes	Bacilli	Lactobacillales	Streptococcaceae	Streptococcus	Streptococcus_mitis_T/pneumoniae_JJA
137	GACGAACGCTGGCGGCGTGCCTAATACATGCAAGTCGAGCGAAGTTTTTCTGGTGCTTGCACTAGAAAAACTTAGCGGCGAACGGGTGAGTAACACGTAAAGAACCTGCCTTATAGACTGGGACAACTATTGGAAACGATAGCTAATACCGGATAACAGCATTAACTGCATGGTTGATGTTTAAAAGTTGGTTTTGCTAACACTATGAGATGGCTTTGCGGTGCATTAGCTAGTTGGTGGGGTAAAGGCCTACCAAGGCGACGATGCATAGCCGACCTGAGAGGGTGATCGGCCACACTGGGACTGAGACACGGCCCAG	0	0.579216	0	0	0	0	Firmicutes	Bacilli	Bacillales	Bacillales_Incertae_Sedis_XI	Gemella	Gemella_haemolysans
138	GACGAACGCTGGCGGCGTGCTTAACACATGCAAGTCTAGCGTGCGGAGGACTTCGGTCCAAAGCAAGCGGCGGACGGGTGAGTAACGCGTGAACAATCTGTCCCAGACAGGGGGATAACACTCTGAAAAGGGTGCTAATACCGCATAAGACCACGGCCTCGCATGGGGCTGGGGTAAAAGATTTATCGGTTTGGGGTGAGTTCGCGTCTGATTAGCTAGTTGGTGAGGTAACGGCCCACCAAGGCGACGATCAGTAGCCGATCTGAGAGGATGACCGGCCACATTGGAACTGAGACACGGTCCAA	0	0.579216	0	0	0	0	Firmicutes	Clostridia	Clostridiales	unclassified_Clostridiales	unclassified_Clostridiales	Clostridiales
139	GATGAACGCTAGCGACAGGCCTAACACATGCAAGTCGAGGGGCAGCACATGAGTAGCAATACGATGGTGGCGACCGGCGCACGGGTGCGTAACACGTATGCAACCTACCTGTAAGAGGGGAATAACCCGGAGAAATTCGGACTAATACCGCATAATACTAATAAACTGCATGGTTTTTTAGTTAAACATTTATGGCTTACAGATGGGCATGCGTATGATTAGCTAGTTGGTGAGGTAACGGCTCACCAAGGCAACGATCATTAGGGGTTCTGAGAGGAAGGTCCCCCACACTGGTACTGAGACACGGACCAG	0	0	0	0.554939	0	0	Bacteroidetes	Bacteroidia	Bacteroidales	Paludibacteraceae	Paludibacter	Paludibacter
140	GACGAACGCTGGCGGCGTGCTTAACACATGCAAGTCGAACGGTAAGGCCCCTTCGGGGGTACACGAGTGGCGAACGGGTGAGTAACACGTGAGTAACCTGCCCCAGACACTGGGATAACACCTGGAAACAGGTGCTAATACCGGATACGAACTTCCACGGCATCGCGGAAGTTGGAAAGCTCCGGCGGTCTGGGATGGACTCGCGGCCTATCAGCTTGTTGGTGAGGTAACGGCTCACCAAGGCTTCGACGGGTAGCCGGCCTGAGAGGGCGACCGGCCACATTGGGACTGAGATACGGCCCAA	0	0	0	0.554939	0	0	Actinobacteria	Actinobacteria	Propionibacteriales	Propionibacteriaceae	Tessaracoccus	Tessaracoccus
141	GACGAACGCTGGCGGCGTGCTTAACACATGCAAGTCGAACGGTGACCTCGGAGCTTGCTCCGGGTGATCAGTGGCGAACGGGTGAGTAACACGTGAGTAACCTGCCCCTTTCTCTGGGATAACTCCGGGAAACCGGTGCTAATACTGGATACGACCCGAGCGGGCATCCGCATCGGGTGGAAAGTTTTTCGGTAAGGGATGGACTCGCGGCCTATCAGCTTGTTGGTGGGGTAATGGCCCACCAAGGCGACGACGGGTAGCCGGCCTGAGAGGGCGACCGGCCACACTGGGACTGAGACACGGCCCAG	0	0	0.552639	0	0	0	Actinobacteria	Actinobacteria	Micrococcales	Intrasporangiaceae	Ornithinicoccus	Ornithinicoccus_hortensis
142	GACGAACGCTGGCGGCGTGCCTAACACATGCAAGTCGAACGGAGTTAACCGCTGATTTGAAGGTAGCTTGCTACTGAATTTTCTTGGTTAACTTAGTGGCGGACGGGTGAGTAACGCGTGAGGAACCTGCCCTTTAGAGGGGGACAACAGTTGGAAACGACTGCTAATACCGCATAAAGTATAATTGGGACATCCCGGATATACCAAAGGAGCAATCCGCTAGAGGATGGCCTCGCGTCTGATTAGATAGTTGGTGAGGTAACGGCTCACCAAGTCGACGATCAGTAGCCGGACTGAGAGGTTGAACGGCCACATTGGGACTGAGACACGGCCCAG	0	0.545145	0	0	0	0	Firmicutes	Clostridia	Clostridiales	Ruminococcaceae	unclassified_Ruminococcaceae	Ruminococcaceae
143	GATGAACGCTGGCAGTGTGCCTTAGACATGCAAGTCGGACGGGGCGCTTCTCTTTGATCCTTTCGGGGTGATTTGGGTTGTTGCCTAGTGGCGTACGGGTGAGTAACACGTGGGTGACCTGCCCTCAAGTGGGGGATAACTCTGGGAAACTGGGGCTAATCCCGCATGTGCTGCATCTTTCGTTTGGTGTAGTAAAGGAACTTTGTTTCGCTTGGGGATGGGCCCGCGGCCTATCAGCTTGTTGGTGTGGTAATGGCGCACCAAGGCTTTGACAGGTAGCCGGCCTGAGAGGGTGTTCGGCCACAGGGGCACTGAGATACGGGCCCC	0	0.545145	0	0	0	0	Deinococcus-Thermus	Deinococci	Trueperales	Trueperaceae	Truepera	Truepera
144	GACGAACGCTGGCGGCGTGCCTAACACATGCAAGTCGAACGGGGTGATTCCTTCGGGGATCACTTAGTGGCGAACGGGTGAGTAACGCGTGAGGAACCTGCCTCTCAGTGGGGGACAACAGTTGGAAACGACTGCTAATACCGCATAATGTTTTCGGACCGCATGATCTGAAAACCAAAGATTTATTGCTGAGAGATGGCCTTGCGTCTGATTAGCTAGTTGGTGGGGTAACGGCCCACCAAGGCGACGATCAGTAGCCGGTCTGAGAGGATGAACGGCCACATTGGGACTGAGATACGGCCCAG	0	0.511073	0	0	0	0	Firmicutes	Clostridia	Clostridiales	Ruminococcaceae	unclassified_Ruminococcaceae	Ruminococcaceae
145	GATGAACGCTAGCGGGAGGCTTAATACATGCAAGTCGAACGGCAGCAGGTCCTTCGGGATGCTGGCGAGTGGCGAACGGGTGAGTAACGCGTACACGATCTGCCCATAAGTCTGGGATAGTCACTGGAAACGGTGAATAATACCGGATGTGGATAAATTGCTTCATGGTAATTTATTTAAAGGCTGGTCTGCTTATGGATGAGTGTGCGTCCTATTAGTTAGTTGGTGAGGTAACGGCTCACCAAGACGATGATAGGTAGGGGGCGTGAGAGCGTGGACCCCCACACGGGTACTGAGACACGGACCCG	0	0.511073	0	0	0	0	Bacteroidetes	Saprospiria	Saprospirales	Saprospiraceae	Membranicola	Membranicola
146	AACGAACGCTGGCGGCATGCCTAACACATGCAAGTCGAACGAGATCTTCGGATCTAGTGGCGCACGGGTGTGTAACGCGTGGGAATCTGCCCAAAGGTAGGGAATAACTCGGGGAAACCCGTGCTAATACCCTATAATGTCTTCGGACCAAAGATTTATCGCCTTTGGATGAGCCCGCGTTGGATTAGCTTGTTGGTAGGGTAATGGCCTACCAAGGCGACGATCCATAGCTGGTCTGAGAGGATGATCAGCCACACTGGGACTGAGACACGGCCCAG	0	0.511073	0	0	0	0	Proteobacteria	Alphaproteobacteria	Sphingomonadales	unclassified_Sphingomonadales	unclassified_Sphingomonadales	Sphingomonadales
147	GACGAACGCTGGCGGCGTGCTTAACACATGCAAGTCGAACGGTGAAGCGCCTTCCTTTTTGGTGGGTGTGGATGAGTGGCGAACGGGTGAGTAACACGTGAGTAACCTGCCCCCTTCTTCTGGATAACCGCATGAAAGTGTGGCTAATACGGGATATTCTGGGTCTGTCGCATGATGGGTCTGGGAAAGATATTGCTTCGGTGGGGGATGGGCTCGCGGCCTATCAGCTTGTTGGTGGGGTGATGGCCTACCAAGGCGGTGACGGGTAGCCGGCCTGAGAGGGTGGACGGTCACACTGGGACTGAGACACGGCCCAG	0	0	0	0.499445	0	0	Actinobacteria	Actinobacteria	Actinomycetales	Actinomycetaceae	Actinomyces	Actinomyces
148	ATTGAACGCTGGCGGCAGGCTTAACACATGCAAGTCGAACGGTAGCAGGTAAGTACTTGTACTTATGCTGACGAGTGGCGGACGGGTGAGTAATGCTTGGGGATCTGGCTTATGGAGGGGGATAACGACGGGAAACTGTCGCTAATACCGCGTAGAATCGAGAGATGAAAGTGTGGGACCTTCGGGCCACATGCCATAGGATGAACCCAAGTGGGATTAGGTAGTTGGTGGGGTAATGGCCTACCAAGCCGACGATCTCTAGCTGGTCTGAGAGGATGACCAGCCACACCGGGACTGAGACACGGCCCGG	0	0	0	0.499445	0	0	Proteobacteria	Gammaproteobacteria	Pasteurellales	Pasteurellaceae	Aggregatibacter	Aggregatibacter_aphrophilus
149	ATTGAACGCTGGCGGCAGGCTTAACACATGCAAGTCGAACGGTAACATAAAGAAGCTTGCTTCTTTGATGACGAGTGGCGGACGGGTGAGTAATGCTTGGGAATCTAGCTTATGGAGGGGGATAACTACGGGAAACTGTAGCTAATACCGCGTAATATCGAAAGATTAAAGTGTGGGACCTTCGGGCCACATGCCATAGGATGAGCCCAAGTGGGATTAGGTAGTTGGTGAGGTAAAGGCTCACCAAGCCGACGATCTCTAGCTGGTCTGAGAGGATGACCAGCCACACTGGGACTGAGACACGGCCCAG	0	0	0	0.499445	0	0	Proteobacteria	Gammaproteobacteria	Pasteurellales	Pasteurellaceae	Haemophilus	Haemophilus_parainfluenzae
150	GACGAACGCTGGCGGCGTGCCTAATACATGCAAGTAGAACGCTGAAGGAGGAGCTTGCTTCTCCGGATGAGTTGCGAACGGGTGAGTAACGCGTAGGTAACCTGCCTGGTAGCGGGGGATAACTATTGGAAACGATAGCTAATACCGCATAATAGCAGTTATTGCATGATAACTGTTTGAAAGGTGCAATTGCACCACTACCAGATGGACCTGCGTTGTATTAGCTAGTTGGTGGGGTAACGGCTCACCAAGGCGACGATACATAGCCGACCTGAGAGGGTGATCGGCCACACTGGGACTGAGACACGGCCCAG	0	0	0	0.499445	0	0	Firmicutes	Bacilli	Lactobacillales	Streptococcaceae	Streptococcus	Streptococcus_dentisani
151	GACGAACGCTGGCGGCGTGCTTAACACATGCAAGTCGAACGGAAAGGCCCTGCTTGCAGGGTACTCGAGTGGCGAACGGGTGAGTAACACGTGGGTGATCTGCCCTGCACTTCGGGATAAGCCTGGGAAACTGGGTCTAATACCGGATAGGAGCCATTTTTAGTGTGATGGTTGGAAAGTTTTTTCGGTGTAGGATGAGCTCGCGGCCTATCAGCTTGTTGGTGGGGTAATGGCCTACCAAGGCGGCGACGGGTAGCCGGCCTGAGAGGGTGGACGGCCACATTGGGACTGAGATACGGCCCAG	0	0	0.497375	0	0	0	Actinobacteria	Actinobacteria	Mycobacteriales	Corynebacteriaceae	Corynebacterium	Corynebacterium_tuberculostearicum/pseudogenitalium
152	GACGAACGCTGGCGGCGTGCCTAATACATGCAAGTAGAACGCTGAAGAGAGGAGCTTGCTCTTCTTGGATGAGTTGCGAACGGGTGAGTAACGCGTAGGTAACCTGCCTGGTAGCGGGGGATAACTATTGGAAACGATAGCTAATACCGCATAAAATGGATTATCGCATGATAATCGATTGAAAGGTGCAAATGCATCACTACCAGATGGACCTGCGTTGTATTAGCTAGTTGGTGGGGTAACGGCTCACCAAGGCGACGATACATAGCCGACCTGAGAGGGTGATCGGCCACACTGGGACTGAGACACGGCCCAG	0	0	0.497375	0	0	0	Firmicutes	Bacilli	Lactobacillales	Streptococcaceae	Streptococcus	Streptococcus
153	GATGAACGCTGGCGGCGTGCTTAACACATGCAAGTCGAACGGGATCCCAGGAGCTTGCTCCTGGGTGAGAGTGGCGAACGGGTGAGTAATGCGTGACCGACCTGCCCCATACACCGGAATAGCTCCTGGAAACGGGTGGTAATGCCGGATGCTCCAGTTGGATGCATGTCCTTCTGGGAAAGATTCATCGGTATGGGATGGGGTCGCGTCCTATCAGCTTGATGGCGGGGTAACGGCCCACCATGGCTTCGACGGGTAGCCGGCCTGAGAGGGCGACCGGCCACATTGGGACTGAGATACGGCCCAG	0	0	0.483559	0	0	0	Actinobacteria	Actinobacteria	Bifidobacteriales	Bifidobacteriaceae	Bifidobacterium	Bifidobacterium_adolescentis_ATCC15703
154	GATGAACGCTGGCTACAGGCTTAACACATGCAAGTCGAGGGGCAGCATGCCGGTTGCTTGCAACCGGTGATGGCGACCGGCGCACGGGTGAGTAACGCGTATCCAACCTTCCCGCGACCAAGGGATAACCTGCCGAAAGGCAGACTAATACCTTATGTCCTCCTTTGAAGGCATCTGACGAGGAGCAAAGATCCGTCGGTCACGGATGGGGATGCGTCCGATTAGCTTGTTGGCGGGGCAACGGCCCACCAAGGCTTCGATCGGTAGGGGTTCTGAGAGGAAGGCCCCCCACACTGGAACTGAGACACGGTCCAG	0	0	0.483559	0	0	0	Bacteroidetes	Bacteroidia	Bacteroidales	Prevotellaceae	Prevotella	Prevotella_buccae
155	AACGAACGCCAGCGGCGTGGATTAGGCATGCAAGTCGAACGTGATCCGTAGCAATACGGTGAAAGTGGCGGAAGGGTGAGTAATGCCTAGATAACCTACCTCAGAGACTGGGATAACTCCGGGAAACTGGAGCTAATACCGGATGGGATCGCGGGGTCACATGGTTCTGCGATTAAAGGTGCCCTCTGAATATGGTAGCACTCTGAGAGGGGTCTAGGTCCTATCAGCTAGTTGGTGAGGGTAACGGCCCACCAAGGCTTTGACGGGTAGCCGGCCTTAGCGGGTGTCCGGCCACATTGGGACTGAGACACTGCCCAA	0	0	0	0	0	0.483351	Planctomycetes	Planctomycetacia	unclassified_Planctomycetacia	unclassified_Planctomycetacia	unclassified_Planctomycetacia	Planctomycetacia
156	ATTGAACGCTGGCGGCATGCTTTACACATGCAAGTCGAACGGCAGCGGGGGCTTCGGCCTGCCGGCGAGTGGCGAACGGGTGAGTAATGCATCGGAACGTGCCCATGTCGTGGGGGATAACTACGCGAAAGCGTGGCTAATACCGCATACGCCCTGAGGGGGAAAGCGGGGGATCTTTCGGGACCTCGCGCGATTGGAGCGGCCGATGTCGGATTAGCTAGTTGGTGGGGTAAAGGCTCACCAAGGCGACGATCCGTAGCTGGTCTGAGAGGATGATCAGCCACACTGGGACTGAGACACGGCCCAG	0	0.374787	0.0828958	0	0	0	Proteobacteria	Betaproteobacteria	Rhodocyclales	Zoogloeaceae	Thauera	Thauera
157	ATTGAACGCTGGCGGCATGCTTTACACATGCAAGTCGAACGGCAGCGCGGGCTTCGGCCTGGCGGCGAGTGGCGAACGGGTGAGTAATACATCGGAACGTGCCCAGTAGTGGGGGATAGCTCGGCGAAAGCCGGATTAATACCGCATACGACCTGAGGGTGAAAGCGGGGGATCTTCGGACCTCGCGCTATTGGAGCGGCCGATGGCAGATTAGCTAGTTGGTGGGGTAAAGGCCTACCAAGGCGACGATCTGTAGCTGGTCTGAGAGGACGACCAGCCACACTGGGACTGAGACACGGCCCAG	0	0	0	0.443951	0	0	Proteobacteria	Betaproteobacteria	Burkholderiales	Burkholderiaceae	Lautropia	Lautropia_mirabilis
158	ATTGAACGCTGGCGGCATGCTTAACACATGCAAGTCGAACGGAAACGACGGAGCTTGCTCCGGGCGTCGAGTGGCGGACGGGTGAGTAATGCATGGGAATCTGCCTTTTGCTGGGGGATAACGTAGGGAAACTTACGCTAATACCGCATAAGACCTGAGGGTGAAAGTGGGGGACCGTAAGGCCTCACGGCAGAAGATGAGCCCATGTCGGATTAGCTAGTTGGTGGGGTAAAGGCCTACCAAGGCGACGATCCGTAGCTGGTCTGAGAGGATGATCAGCCACACTGGGACTGAGACACGGCCCAG	0	0	0	0.443951	0	0	Proteobacteria	Gammaproteobacteria	Cardiobacteriales	Cardiobacteriaceae	Cardiobacterium	Cardiobacterium_valvarum
159	GATGAACGCTGGCGGCGTGCCTAACACATGCAAGTCGAGCGAGAAAAGTTGGAAGGAAGCTTCGGCAGACGGAAGACTTGGAAAGCGGCGGACGGGTGAGTAACGCGTGGGCAACCTGCCCCATACAAAGGGATAGCCACTGGAAACGGTGATTAATACCTTATAACACTTTAAGGTCGCATGACCTAGAAGTCAAAATGTTAGTGGTATGGGATGGGCCCGCGTCTGATTAGCTAGTTGGTGAGGTAACGGCTCACCAAGGCGACGATCAGTAGCCGACCTGAGAGGGTGATCGGCCACACTGGAACTGAGACACGGTCCAG	0	0	0	0.443951	0	0	Firmicutes	Clostridia	Clostridiales	Clostridiales_Incertae_Sedis_XII	Fusibacter	Fusibacter
160	GACAAACGCTGGCGGCGTGCCTAATACATGCAAGTAGAACGCTGAAGGAGGAGCTTGCTTCTCCGGATGAGTTGCGAACGGGTGAGTAACGCGTAGGTAACCTGCCTGGTAGCGGGGGATAACTATTGGAAACGATAGCTAATACCGCATAAGAGTAGATGTTGCATGACATTTGCTTAAAAGGTGCAATTGCATCACTACCAGATGGACCTGCGTTGTATTAGCTAGTTGGTGGGGTAACGGCTCACCAAGGCGACGATACATAGCCGACCTGAGAGGGTGATCGGCCACACTGGGACTGAGACACGGCCCAG	0	0.44293	0	0	0	0	Firmicutes	Bacilli	Lactobacillales	Streptococcaceae	Streptococcus	Streptococcus_mitis_T/pneumoniae_JJA
161	ATTGAACGCTGGCGGCAGGCTTAACACATGCAAGTCGAACGGTAACATAAAGAAGCTTGCTTCTTTGATGACGAGTGGCGGACGGGTGAGTAATGCTTGGGAATCTAGCTTATGGAGGGGGATAACTACGGGAAACTGTAGCTAATACCGCGTAGTATCGAGAGATGAAAGTGTGGGACCTTCGGGCCACATGCCATAGGATGAGCCCAAGTGGGATTAGGTAGTTGGTGAGGTAAAGGCTCACCAAGCCGACGATCTCTAGCTGGTCTGAGAGGATGACCAGCCACACTGGGACTGAGACACGGCCCAG	0	0	0.428295	0	0	0	Proteobacteria	Gammaproteobacteria	Pasteurellales	Pasteurellaceae	Haemophilus	Haemophilus_parainfluenzae
162	GATGAACGCTGGCGGCGTGCCTAATACATGCAAGTCGAGCGAACGGACGAGAAGCTTGCTTCTCTGATGTTAGCGGCGGACGGGTGAGTAACACGTGGATAACCTACCTATAAGACTGGGATAACTTCGGGAAACCGGAGCTAATACCGGATAATATTTTGAACCGCATGGTTCAAAAGTGAAAGACGGTCTTGCTGTCACTTATAGATGGATCCGCGCTGCATTAGCTAGTTGGTAAGGTAACGGCTTACCAAGGCAACGATGCATAGCCGACCTGAGAGGGTGATCGGCCACACTGGAACTGAGACACGGTCCAG	0	0	0.428295	0	0	0	Firmicutes	Bacilli	Bacillales	Staphylococcaceae	Staphylococcus	Staphylococcus_aureus
163	GATGAACGCTAGCGATAGGCTTAACACATGCAAGTCGAGGGGCAGCATGGTCTTAGCTTGCTAAGACTGATGGCGACCGGCGCACGGGTGCGTAACGCGTATGCAACTTGCCTCACAGAGGGGGATAACCCGTCGAAAGACGGACTAATACCGCGTACACTCCAGCTTGGGCATCTAGGCTAGAGGAAATGAATTTCGCTGTGAGATAGGCATGCGTCCCATTAGCTAGTTGGTGAGGTAACGGCTCACCAAGGCGACGATGGGTAGGGGAACTGAGAGGTTGAACCCCCACACTGGTACTGAGACACGGACCAG	0	0	0	0.388457	0	0	Bacteroidetes	Bacteroidia	Bacteroidales	Porphyromonadaceae	Porphyromonas	Porphyromonas_catoniae
164	GACGAACGCTGGCGGTGTGCTTAACACATGCAAGTCGAACGGTAAGGCCCTTTTTTGGGGTACACGAGTGGCGAACGGGTGAGTAACACGTGAGTAACCTGCCCTCATCTCTGGGATAACAGTCGGAAACGGTTGCTAATACTGGATATGAGCTTGCAAGGCATCTTGTGGGTTGGAAAGATATTTTTTTGGTTGGGGATGGACTCGCGGCCTATCAGCTTGTTGGTGAGGTAGTGGCTCACCAAGGCTTCGACGGGTAGCCGGCCTGAGAGGGCGACCGGCCACATTGGGACTGAGATACGGCCCAA	0	0	0	0.388457	0	0	Actinobacteria	Actinobacteria	Propionibacteriales	Propionibacteriaceae	Arachnia	Arachnia_propionica
165	GACGAACGCTGGCGGCGTGCCTAATACATGCAAGTAGAACGCTGAAGCTTGGTGCTTGCACCGAGCGGATGAGTTGCGAACGGGTGAGTAACGCGTAGGTAACCTGCCTGGTAGCGGGGGATAACTATTGGAAACGATAGCTAATACCGCATAAGAGTAGATGTTGCATGACATTTGCTTAAAAGGTGCAATTGCATCACTACCAGATGGACCTGCGTTGTATTAGCTAGTTGGTGGGGTAACGGCTCACCAAGGCGACGATACATAGCCGACCTGAGAGGGTGATCGGCCACACTGGGACTGAGACACGGCCCAG	0	0	0	0.388457	0	0	Firmicutes	Bacilli	Lactobacillales	Streptococcaceae	Streptococcus	Streptococcus_oralis_type
166	GACGAACGCTGGCGGCGTGCCTAATACATGCAAGTAGAACGCTGAAAGAGGAGCTTGCTTCTCTGGATGAGTTGCGAACGGGTGAGTAACGCGTAGGTAACCTGCCTGGTAGCGGGGGATAACTATTGGAAACGATAGCTAATACCGCATAAGAGTAGATGTTGCATGACATTTGCTTAAAAGGTGCAATTGCATCACTACCAGATGGACCTGCGTTGTATTAGCTAGTTGGTGGGGTAACGGCTCACCAAGGCGACGATACATAGCCGACCTGAGAGGGTGATCGGCCACACTGGGACTGAGACACGGCCCAG	0	0	0.386847	0	0	0	Firmicutes	Bacilli	Lactobacillales	Streptococcaceae	Streptococcus	Streptococcus_mitis_T/pneumoniae_JJA
167	GACGAACGCTGGCGGCGTGCTTAACACATGCAAGTCGAACGATGAAGCCTAGCTTGCTAGGTGGATTAGTGGCGAACGGGTGAGTAATACGTGAGTAACCTACCTTTAACTCTGGGATAAGCCTGGGAAACTGGGTCTAATACCGGATACGACCAATCTCCGCATGGGGTGTTGGTGGAAAGCGTTATGTAGTGGTTATAGATGGGCTCACGGCCTATCAGCTTGTTGGTGAGGTAACGGCTCACCAAGGCGACGACGGGTAGCCGGCCTGAGAGGGTGACCGGCCACACTGGGACTGAGACACGGCCCAG	0	0.136286	0.20724	0	0	0	Actinobacteria	Actinobacteria	Micrococcales	Micrococcaceae	Rothia	Rothia_mucilaginosa
168	GACGAACGCTGGCGGCGTGCTTTACACATGCAAGTCGAACGATGATGCCGTGCTTGCACGGTTGATTAGTGGCGAACGGGTGAGTAACACGTGAGTAACCTGCCCCAGACTCTGGGATAACTACCGGAAACGGTGGCTAATACTGGATATGACACACTTGCGCATGTTGGTGTGTGGAAAGGATTTCTGGTTTGGGATGGACTCGCGGCCCATCAGCTTGTTGGTGGGGTAGTGGCCTACCAAGGCTTTGACGGGTAGCCGGCCTGAGAGGGTGACCGGCCACACTGGGACTGAGACACGGCCCAG	0	0	0	0.332963	0	0	Actinobacteria	Actinobacteria	Micrococcales	Beutenbergiaceae	unclassified_Beutenbergiaceae	Beutenbergiaceae
169	ATTGAACGCTGGCGGCAGGCCTAACACATGCAAGTCGAACGGTAACAGGAAGCAGCTTGCTGCTTCGCTGACGAGTGGCGGACGGGTGAGTAATGTCTGGGAAACTGCCTGATGGAGGGGGATAACTACTGGAAACGGTAGCTAATACCGCATAACGTCGCAAGACCAAAGAGGGGGACCTTAGGGCCTCTTGCCATCGGATGTGCCCAGATGGGATTAGCTAGTAGGTGGGGTAACGGCTCACCTAGGCGACGATCCCTAGCTGGTCTGAGAGGATGACCAGCCACACTGGAACTGAGACACGGTCCAG	0	0	0	0.332963	0	0	Proteobacteria	Gammaproteobacteria	Enterobacterales	Enterobacteriaceae	Escherichia/Shigella	Escherichia/Shigella
170	GATGAACGCTGGCGGCGTGCTTAACACATGCAAGTCGAGCGGGAGACTTCGGTCTCTAGCGGCGGACGGGTGAGTAACGCGTGGGTAACCTGCCTCATGAAGGGGGATAACAGTGAGAAATCACTGCTAATACCGCATAAGACCACAGTACCGCATGGTATGGTGGTAAAAGGAGCAATTCGACATGAGATGGACCCGCGTCTGATTAGCTAGTTGGTGAGGTAATGGCTCACCAAGGCGACGATCAGTAGCCGACCTGAGAGGGTGATCGGCCACATTGGGACTGAGACACGGCCCAA	0	0	0	0.332963	0	0	Firmicutes	Clostridia	Clostridiales	Lachnospiraceae	unclassified_Lachnospiraceae	Lachnospiraceae
171	GACGAACGCTGGCGGCGTGCCTAATACATGCAAGTAGAACGCACAGTTTATACCGTAGCTTGCTACACCATAGACTGTGAGTTGCGAACGGGTGAGTAACGCGTAGGTAACCTGCCTGGTAGCGGGGGATAACTATTGGAAACGATAGCTAATACCGCATAATATTAATTATTGCATGATAATTGATTAAAAGGTGCAATTGCACCACTACCAGATGGACCTGCGTTGTATTAGCTAGTAGGTGAGGTAACGGCTCACCTAGGCGACGATACATAGCCGACCTGAGAGGGTGATCGGCCACACTGGGACTGAGACACGGCCCAG	0	0	0	0.332963	0	0	Firmicutes	Bacilli	Lactobacillales	Streptococcaceae	Streptococcus	Streptococcus_gordonii
172	GACGAACGCTGGCGGCGTGCCTAATACATGCAAGTCGAGCGAGCGGAACTAACAGATTTACCTCGGTAATGACGTTAGGAAAGCGAGCGGCGGATGGGTGAGTAACACGTGGGGAACCTGCCCCATAGTCTGGGATACCACTTGGAAACAGGTGCTAATACCGGATAAGAAAGCAGATCGCATGATCAGCTTTTAAAAGGCGGCGTAAGCTGTCGCTATGGGATGGCCCCGCGGTGCATTAGCTAGTTGGTAAGGTAAAGGCTTACCAAGGCGATGATGCATAGCCGAGTTGAGAGACTGATCGGCCACATTGGGACTGAGACACGGCCCAA	0	0	0	0	0.327925	0	Firmicutes	Bacilli	Lactobacillales	Lactobacillaceae	Lactobacillus	Lactobacillus_crispatus
173	AACGAACGCTGGCGGCAGGCTTAACACATGCAAGTCGAGCGCCCCGCAAGGGGAGCGGCAGACGGGTGAGTAACGCGTGGGAATCTACCCATCTCTACGGAACAACTCCGGGAAACTGGAGCTAATACCGTATACGTCCTTATGGAGAAAGATTTATCGGAGATGGATGAGCCCGCGTTGGATTAGCTAGTTGGTGGGGTAATGGCCTACCAAGGCGACGATCCATAGCTGGTCTGAGAGGATGATCAGCCACACTGGGACTGAGACACGGCCCAG	0	0	0	0	0	0.32671	Proteobacteria	Alphaproteobacteria	Rhizobiales	Phyllobacteriaceae	Mesorhizobium	Mesorhizobium_loti
174	GATGAACGCTAGCGGCAGGCCTAACACATGCAAGTCGAGGGGTAGGAGCAGCTTGCTGCTTTGAGACCGGCGCACGGGTGCGTAACGCGTATGCAATCTACCTTATACTAAGGGATAGCCCGGAGAAATCCGGATTAATACCTTATGGTTTTTATGAATAGCATTATTTATAGAATAAAGATTTATCGGTATAAGATGAGCATGCGTCCCATTAGTTAGTTGGTGTGGTAACGGCACACCAAGACGATGATGGGTAGGGGTCCTGAGAGGGAGATCCCCCACACTGGTACTGAGACACGGACCAG	0	0	0.317767	0	0	0	Bacteroidetes	Flavobacteriia	Flavobacteriales	Flavobacteriaceae	Myroides	Myroides
175	GACGAACGCTGGCGGCGTGCCTAATACATGCAAGTCGAACGAGAGCGACCGGTGCTTGCACTGGTCAATCTAGTGGCGAACGGGTGAGTAACACGTGGGTAACCTGCCCATCAGAGGGGGATAACATTCGGAAACGGATGCTAAAACCGCATAGGTTCTTTAGTCACATGACTGAAGAAGGAAAAGAGGCTTCGGCTTCTGCTGATGGATGGACCCGCGGTGCATTAGCTAGTTGGTGAGGTAACGGCTCACCAAGGCCGTGATGCATAGCCGACCTGAGAGGGTGATCGGCCACATTGGGACTGAGACACGGCCCAA	0	0	0	0	0	0.308808	Firmicutes	Bacilli	Lactobacillales	Carnobacteriaceae	Granulicatella	Granulicatella
176	GATGAACGCTGGCGGCGTGCCTAACACATGCAAGTCGAACGGAAATCTCTATGAAGCAGCACTTGTGCTGCGGACTTTAGATTTTAGTGGCGGACGGGTGAGTAACACGTGAGTAACCTGCCTTGGTCAGGGGGATAACCACGGGAAACCGTGGCTAATACCGCATGAAATATCTTTACGGCATCGTATGGGATATCAAAGGAGCAATCCGGACTGAGATGGGCTCGCGTCCGATTAGTTAGTTGGTGGGGTAACGGCCTACCAAGACCGCGATCGGTAGCCGGACTGAGAGGTTGACCGGCCACATTGGGACTGAGACACGGCCCAG	0	0.306644	0	0	0	0	Firmicutes	Clostridia	Clostridiales	Ruminococcaceae	Ercella	Ercella
177	GACGAACGCTGGCGGCGTGCTTAACACATGCAAGTCGAACGAAATTAAAAAATTATCATTGAGCTCTCCGATGAGATGGGAGCCAAGCGTCGTGACCGCGCAGCGGGCACCACGCGTTCAACAAGTGCAACACCAAGTCGAAGGGTTGAATGGTAATTTTTTAATTTAGTGGCAAACGGGTGAGTAACACGTAGACAACCTGCCGACAGGATGGGGACAACATTCCGAAAGGAATGCTAATACCGAATGAAGCGGAGGAGAGGCATCTCTCCTCCGTGAAAGATGGCCTCTGAATATGCTATCACCTGTCGATGGGTCTGCGTCTGATTAGCTAGTTGGTGAGGTAACGGCTCACCAAGGCGACGATCAGTAGCCGGTCTGAGAGGATGAACGGCCACA…	0	0.306644	0	0	0	0	Firmicutes	Negativicutes	Selenomonadales	Selenomonadaceae	Selenomonas	Selenomonas
178	ATTGAACGCTGGCGGCATGCCTTACACATGCAAGTCGAACGGCAGCGCGGGAGCAATCCTGGCGGCGAGTGGCGAACGGGTGAGTAATACATCGGAACGTGTCCTGGAGTGGGGGATAGCCCGGCGAAAGCCGGATTAATACCGCATACGCTCTGAGGAGGAAAGCGGGGGATCTTCGGACCTCGCGCTCAAGGGGCGGCCGATGGCAGATTAGGTAGTTGGTGGGGTAAAGGCCTACCAAGCCGACGATCTGTAGCTGGTCTGAGAGGACGACCAGCCACACTGGGACTGAGACACGGCCCAG	0	0	0	0	0	0.304332	Proteobacteria	Betaproteobacteria	Burkholderiales	Burkholderiaceae	Paraburkholderia	Paraburkholderia_acidipaludis
179	GACGAACGCTGGCGGCGTGCTTAACACATGCAAGTCGAACGGAAAGGCCCTGCTTGCAGGGTACTCGAGTGGCGAACGGGTGAGTAACACGTGGGTGATCTGCCCTGCACTTCGGGATAAGCTTGGGAAACTGGGTCTAATACCGGATAGGAGCCATCTTTAGTGTGGTGGTTGGAAAGTTTTTTCGGTGTAGGATGAGCTCGCGGCCTATCAGCTTGTTGGTGGGGTAATGGCCTACCAAGGCGGCGACGGGTAGCCGGCCTGAGAGGGTGTACGGCCACATTGGGACTGAGATACGGCCCAG	0	0	0.303951	0	0	0	Actinobacteria	Actinobacteria	Mycobacteriales	Corynebacteriaceae	Corynebacterium	Corynebacterium_accolens/segmentosum/fastidiosum
180	GACGAACGCTGGCGGCGTGCCTAATACATGCAAGTCGAACGCTTCTTTTCCGCCGAACTTCGGTTCATTGGAAAAGAGGAGTGGCGAACGGGTGAGTAACACGTGGGTAACCTGCCCATCAGAGGGGGATAACACTTGGAAACAGGTGCTAATACCGCATAATGCTTTTTCTCGCATGAGAGAAAGCTGAAAGGCGCTTTTGCGTCACTGATGGATGGACCCGCGGTGCATTAGCTAGTTGGTGAGGTAACGGCTCACCAAGGCAACGATGCATAGCCGACCTGAGAGGGTGATCGGCCACACTGGGACTGAGACACGGCCCAG	0	0.0681431	0.234872	0	0	0	Firmicutes	Bacilli	Lactobacillales	Enterococcaceae	Enterococcus	Enterococcus_saccharolyticus
181	GATGAACGCTAGCGGGAGGCTTAATACATGCAAGTCGAACGGCAGCAGGTCCTTCGGGACGCTGGCGAGTGGCGAACGGGTGAGTAACGCGTACACGATCTGCCCATAAGTCTGGGATAGTCACTGGAAACGGTGAATAATACCGGATGTGGATAAATTGCTTCATGGTAATTTATTTAAAGGCTGGTCTGCTTATGGATGAGTGTGCGTCCTATTAGTTAGTTGGTGAGGTAACGGCTCACCAAGACGATGATAGGTAGGGGGCGTGAGAGCGTGGACCCCCACACGGGTACTGAGACACGGACCCG	0	0	0.290135	0	0	0	Bacteroidetes	Saprospiria	Saprospirales	Saprospiraceae	Membranicola	Membranicola
182	GATGAACGCTGGCGGCGTGCCTAATACATGCAAGTCGAGCGAACAGACGAGGAGCTTGCTCCTCTGACGTTAGCGGCGGACGGGTGAGTAACACGTGGATAACCTACCTATAAGACTGGGATAACTTCGGGAAACCGGAGCTAATACCGGATAACATGTTGAACCGCATGGTTCAACAGTGAAAGACGGTCTTGCTGTCACTTATAGATGGATCCGCGCCGCATTAGCTAGTTGGTAAGGTAACGGCTTACCAAGGCAACGATGCGTAGCCGACCTGAGAGGGTGATCGGCCACACTGGAACTGAGACACGGTCCAG	0	0	0	0	0	0.281955	Firmicutes	Bacilli	Bacillales	Staphylococcaceae	Staphylococcus	Staphylococcus_capitis/epidermidis/caprae
183	AACGAACGCCAGCGGCGTGGATTAGGCATGCAAGTCGAACGGACACCGTAGCAATACGGTGTTAGTGGCGGAAGGGTGAGTAATGCATAGATAACCTGCCCCCGAGACCGGGATAACTTCGGGAAACCGAAGCTAAGACCGGATGGGATCGCCGGGTCGCATGGCCTGGTGATTAAAGGAGGCCTCTGAAGATGCTCCCGCTCGGGGAGGGATCTATGTCCTATCAGCTAGTTGGTGAGGGTAACGGCCCACCAAGGCATTGACGGGTAGCCGGCCTTAGCGGGTGTCCGGCCACATTGGGACTGAGACACTGCCCAA	0	0	0	0	0	0.277479	Planctomycetes	Planctomycetacia	unclassified_Planctomycetacia	unclassified_Planctomycetacia	unclassified_Planctomycetacia	Planctomycetacia
184	GATGAACGCTAGCGGCAGGCCTAACACATGCAAGTCGAGGGAGGAGCTTTCGGGCTTCGACCGGCGTACGGGTGCGTAACGCGTATACAATCTGCCTTTCACATAGGGATAGCCCGAAGAAATTAGGATTAATACCTAATGGTATATAGGGATGGCATCATTTTTATATTAAAGCTGAGGCGGTGAAAGATGAGTATGCGTTCTATTAGCTAGTTGGAGAGGTAACGGCTCCCCAAGGCGACGATAGATAGGGGTTCTGAGAGGGATATCCCCCACACTGGTACAGAGATACGGACCAG	0	0	0	0.277469	0	0	Bacteroidetes	Flavobacteriia	Flavobacteriales	Flavobacteriaceae	Capnocytophaga	Capnocytophaga
185	GATGAACGCTAGCGGCAGGCCTAACACATGCAAGTCGAGGGATAAGCTTTCGGGCTGAAACCGGCGTACGGGTGCGTAACGCGTATACAATCTGCCTTTCACTGGGGGATAGCCCGAAGAAATTTGGATTAATACCCCATAGAATAATGGTGTGGCATCATATTATTATTAAAGCTACGGTGGTGAAAGATGAGTATGCGTTCTATTAGCTAGTTGGAGAGGTAACGGCTCCCCAAGGCAACGATAGATAGGGGTTCTGAGAGGGATGTCCCCCACACTGGTACTGAGATACGGACCAG	0	0	0	0.277469	0	0	Bacteroidetes	Flavobacteriia	Flavobacteriales	Flavobacteriaceae	Capnocytophaga	Capnocytophaga
186	GATGAACGCTGACAGAATGCTTAACACATGCAAGTCGATGGGGAAGTGGTGCTTGCACCATGGTAACCATGGCGGACGGGTGAGTAACGCGTAAGGGACTTACCTGCAGGACTGGGATAACAGGGGGAAACTCCTGACAAGACCGGATAATGTCATGGAGCTGCATGGCTTTATGATTAAAGGAGACGCCTGCGGAGAGCCTTGCGTCCTATTAGCTAGTTGGTGAGGTAAGGGCTCACCAAGGCGAAGATAGGTAGCCGGCCTGAGAGGGTGGACGGCCACAAGGGGACTGAGATACGGCCCTT	0	0	0	0.277469	0	0	Fusobacteria	Fusobacteriia	Fusobacteriales	Leptotrichiaceae	Leptotrichia	Leptotrichia
187	AACGAACGCTGGCGGCAGGCTTAACACATGCAAGTCGAGCGAGACCTTCGGGTCTAGCGGCGGACGGGTGAGTAACGCGTGGGAACGTACCCTTCTCTACGGAATAGCCCCGGGAAACTGGGAGTAATACCGTATACGCCCTTTGGGGGAAAGATTTATCGGAGAAGGATCGGCCCGCGTTGGATTAGGTAGTTGGTGGGGTAATGGCCCACCAAGCCGACGATCCATAGCTGGTTTGAGAGGATGATCAGCCACACTGGGACTGAGACACGGCCCAG	0	0	0.276319	0	0	0	Proteobacteria	Alphaproteobacteria	Rhodobacterales	Rhodobacteraceae	Paracoccus	Paracoccus_marcusii/carotinifaciens
188	AGTGAACGCTGGCGGTAGGCCTAACACATGCAAGTCGAACGGCAGCACGAGAGAGCTTGCTCTCTTGGTGGCGAGTGGCGGACGGGTGAGGAATACATCGGAATCTACCCTGTCGTGGGGGATAACCTCGGGAAACCGGGACTAATACCGCATACGACCTTCGGGTGAAAGTAGGGGATCGCAAGACCTTACGCGATTGGATGAGCCGATGTCGGATTAGCTTGTTGGCGGGGTAAAAGCCCACCAAGGCGACGATCCGTAGCTGGTCTGAGAGGATGATCAGCCACACTGGGACTGAGACACGGCCCAG	0	0	0.276319	0	0	0	Proteobacteria	Gammaproteobacteria	Xanthomonadales	Xanthomonadaceae	Luteimonas	Luteimonas_lutimaris
189	ATTGAACGCTGGCGGCATGCCTTACACATGCAAGTCGGACGGCAGCGCGGGCTTCGGCCTGGCGGCGAGTGGCGAACGGGTGAGTAATACATCGGAACGTATCCTGGAGTGGGGGATAGCCCGGCGAAAGCCGGATTAATACCGCATACGCTCTGAGGAGGAAAGCGGGGGACCTTCGGGCCTCGCGCTCAAGGGGCGGCCGATGGCGGATTAGGTAGTTGGTGGGGTAAAGGCCTACCAAGCCGACGATCCGTAGCTGGTCTGAGAGGACGACCAGCCACACTGGGACTGAGACACGGCCCAG	0	0	0	0	0	0.255102	Proteobacteria	Betaproteobacteria	Burkholderiales	Burkholderiaceae	Paraburkholderia	Paraburkholderia_kururiensis
190	GATGAACGCTGGCGGCGTGCTTAACACATGCAAGTCGAACGATGAAGCCCAGCTTGCTGGGTGGATTAGTGGCGAACGGGTGAGTAACACGTGAGTAACCTGCCCCCGACTCTGGGATAAGCCCGGGAAACTGGGTCTAATACCGGATATGACCATGGAACGCATGTTTTGTGGTGGAAAGATTTATCGGTGGGGGATGGACTCGCGGCCTATCAGCTTGTTGGTGAGGTAATGGCTCACCAAGGCGACGACGGGTAGCCGGCCTGAGAGGGTGACCGGCCACACTGGGACTGAGACACGGCCCAG	0	0.102215	0.151976	0	0	0	Actinobacteria	Actinobacteria	Micrococcales	Micrococcaceae	Glutamicibacter	Glutamicibacter_protophormiae/mysorens
191	GATGAACGCTGGCGGCGTGCCTAACACATGCAAGTCGAACGAAGCACCTTACCTGATTCTTCGGATGAAGGTCTGGTGACTGAGTGGCGGACGGGTGAGTAACGCGTGGGTAACCTGCCCTGTACAGGGGGATAACAGTTGGAAACGGCTGCTAATACCGCATAAGCGCACGAGAGGACATCCTCTTGTGTGAAAAACTCCGGTGGTACAGGATGGGCCCGCGTCTGATTAGCTGGTTGGCAGGGTAACGGCCTACCAAGGCGACGATCAGTAGCCGGTCTGAGAGGATGAACGGCCACATTGGAACTGAGACACGGTCCAA	0	0	0	0	0	0.250627	Firmicutes	Clostridia	Clostridiales	Lachnospiraceae	Anaerobutyricum	Anaerobutyricum
192	AACGAACGCTGGCGGCGCGTCTTAACCATGCAAGTCGAGCGGCAGGCAGCAATGCCGAGAGCGGCGGACTGGTGAGTAACACGTGGATAACGTACCCCGATGCCCGGGACAGCCTGTAGAAATAGAGGGTGATACCGGATAGATCACTGTTTACGGAAGGTAGACAGCGGGAAAGGAGCTTCGGCTCCGCGCCGGGAACGGTCTGCGGCCCATCAGCTGGACGGCGGGGTAAAGGCCCGCCGTGGCGAGGACGGGTATCCGGCCTGAGAGGGCGGACGGACACATTGGGACTGAGATACGGCCCAG	0	0	0.248687	0	0	0	Spirochaetes	Spirochaetia	Spirochaetales	Spirochaetaceae	Treponema	Treponema_socranskii
193	ATTGAACGCTGGCGGCAGGCCTAACACATGCAAGTCGAACGGTAACAGGAAACAGCTTGCTGTTTCGCTGACGAGTGGCGGACGGGTGAGTAATGTCTGGGAAACTGCCTGATGGAGGGGGATAACTACTGGAAACGGTAGCTAATACCGCATAACGTCGCAAGACCAAAGAGGGGGACCTTCGGGCCTCTTGCCATCGGATGTGCCCAGATGGGATTAGCTTGTTGGTGGGGTAACGGCTCACCAAGGCGACGATCCCTAGCTGGTCTGAGAGGATGACCAGCCACACTGGAACTGAGACACGGTCCAG	0	0.238501	0	0	0	0	Proteobacteria	Gammaproteobacteria	Enterobacterales	Enterobacteriaceae	Escherichia/Shigella	Escherichia/Shigella
194	GATGAACGCTAGCGGGAGGCCTAACACATGCAAGCCGAGCGGTATTGTTTCTTCGGAAATGAGAGAGCGGCGTACGGGTGCGGAACACGTGTGCAACCTGCCTTTATCTGGGGGATAGCCTTTCGAAAGGAAGATTAATACTCCATAATATATTGAACGGCATCGTTTAATATTGAAAGCTCCGGCGGATAGAGATGGGCACGCGCAAGATTAGCTAGTTGGTGAGGTAACGGCTCACCAAGGCGATGATCTTTAGGGGGCCTGAGAGGGTGATCCCCCACACTGGTACTGAGACACGGACCAG	0	0	0	0	0	0.2372	Bacteroidetes	Flavobacteriia	Flavobacteriales	Weeksellaceae	Cloacibacterium	Cloacibacterium_rupense
195	GACGAACGCTGGCGGCGTGCTTAACACATGCAAGTCGAACGATGACGACGGGGCTTGCCCTGTCTGATTAGTGGCGAACGGGTGAGTAACACGTGAGTAACCTGCCCTTCACTTCGGGATAACCTCGGGAAATCGTGGCTAATACCGGATATGAGCTCCTGCCGCATGGTGGGGGTTGGAAAGATTTATCGGTGAAGGATGGACTCGCGGCCTATCAGTTTGTTGGTGAGGTAATGGCTCACCAAGACGATGACGGGTAGCCGGCCTGAGAGGGCGACCGGCCACACTGGGACTGAGACACGGCCCAG	0	0	0.234872	0	0	0	Actinobacteria	Actinobacteria	Micrococcales	Dermabacteraceae	Brachybacterium	Brachybacterium
196	GATGAACGCTAGCTATAGGCTTAACACATGCAAGTCGAGGGGAAACGGCATTATGTGCTTGCACATTTTGGACGTCGACCGGCGCACGGGTGAGTATCGCGTATCCAACCTGCCCTTTACTTGGGGATACCCCGTTGAAAGACGGCCTAATACCCGATGTAATTCATTGATGGCATCAGATATGAATAAAAGATTTATCGGTAAAGGATGGGGATGCGTCTGATTAGCTTGTTGGTGAGGTAAAGGCTCACCAAGGCAACGATCAGTAGGGGTTCTGAGAGGAAGGTCCCCCACATTGGAACTGAGACACGGTCCAA	0	0	0.234872	0	0	0	Bacteroidetes	Bacteroidia	Bacteroidales	Prevotellaceae	Prevotella	Prevotella_pallens
197	GATGAACGCTAGCGGGAGGCCTAACACATGCAAGCCGAGCGGTAGAATATCTTCGGATATTTGAGAGCGGCGTACGGGTGAGGAACACGTGTGCAACCTGCCTTTATCTGGGAGATAGCCTTTCGAAAGAAAGATTAATATCCCATAATATATTGAGTGGCATCACTTAATATTGAAAGCTCCGGCGGATAGAGATGGGCACGCGCAAGATTAGATAGTTGGTGAGGTAACGGCTCACCAAGTCTACGATCTTTAGGGGGCCTGAGAGGGTGATCCCCCACACTGGTACTGAGACACGGACCAG	0	0	0.234872	0	0	0	Bacteroidetes	Flavobacteriia	Flavobacteriales	Weeksellaceae	Chryseobacterium	Chryseobacterium
198	GATGAACGCTAGCTATAGGCTTAACACATGCAAGTCGAGGGGCAGCATATAGATTGCTTGCAATTTATGATGGCGACCGGCGCACGGGTGAGTAACGCGTATCCAACCTACCCATTACTAGGGAATAACCCAGCGAAAGTTGGCCTAATGCCCTATGTAGTCGTTTGATCGCCTGAGGTTTCGACGAAAGATTTATCGGTATTGGATGGGGATGCGTCTGATTAGCTTGTTGGCGGGGTAAAGGCCCACCAAGGCAACGATCAGTAGGGGTTCTGAGAGGAAGGTCCCCCACATTGGAACTGAGACACGGTCCAA	0	0	0	0	0	0.232725	Bacteroidetes	Bacteroidia	Bacteroidales	Prevotellaceae	Prevotella	Prevotella_amnii
199	ATTGAACGCTGGCGGCAGGCCTAACACATGCAAGTCGAGCGGGGTTTTCGGACCTAGCGGCGGACGGGTGAGTAATGCGTAGGAAGCTGCCCGATAGAGGGGGATACCAGTTGGAAACGACTGTTAATACCGCATAATGTCTACGGACCAAAGTGTGGGACCTTCGGGCCACATGCTATCGGATGCGCCTACGTGGGATTAGCTAGTTGGTGTGGTAATGGCGCACCAAGGCGACGATCCCTAGCTGGTTTGAGAGGATGATCAGCCACACTGGGACTGAGACACGGCCCAG	0	0	0	0.221976	0	0	Proteobacteria	Gammaproteobacteria	Chromatiales	Chromatiaceae	Alishewanella	Alishewanella
200	ATTGAACGCTGGCGGCATGCTTTACACATGCAAGTCGAACGGCAGCGGGGTAGTGCTTGCACTACTGTCCGGCGAGTGGCGAACGGGTGAGTAATATATCGGAACGTACCGAGTAATGGGGGATAACCAATCGAAAGATTGGCTAATACCGCATACGTCCTAAGGGAGAAAGCGGGGGATCGCAAGACCTCGCGTTATTCGAGCGGCCGATAACTGATTAGCTAGTTGGTGGGGTAAAGGCCTACCAAGGCGACGATCAGTAGCGGGTCTGAGAGGACGATCCGCCACACTGGGACTGAGACACGGCCCAG	0	0	0	0.221976	0	0	Proteobacteria	Betaproteobacteria	Neisseriales	Neisseriaceae	Eikenella	Eikenella_corrodens
201	ATTGAACGCTGGCGGCATGCTTTACACATGCAAGTCGGACGGCAGCACAGAGAAGCTTGCTTCTTGGGTGGCGAGTGGCGAACGGGTGAGTAACGCATCGGAACGTACCGAGTAATGGGGGATAACTGTCCGAAAGGACAGCTAATACCGCATACGCCCTGAGGGGGAAAGCGGGGGATCTTAGGACCTCGCGTTATTCGAGCGGCCGATGTCTGATTAGCTGGTTGGCGGGGTAAAGGCCCACCAAGGCGACGATCAGTAGCGGGTCTGAGAGGATGATCCGCCACACTGGGACTGAGACACGGCCCAG	0	0	0	0.221976	0	0	Proteobacteria	Betaproteobacteria	Neisseriales	Neisseriaceae	Neisseria	Neisseria
202	GACGAACGCTGGCGGCGTGCCTAATACATGCAAGTAGAACGCTGAAGAGAGGAGCTTGCTCTTCTTGGATGAGTTGCGAACGGGTGAGTAACGCGTAGGTAACCTGCCTGGTAGCGGGGGATAACTATTGGAAACGATAGCTAATACCGCATAACAACAGTTGTTGCATGACAGCTGTTTAAAAGATGCAATTGCATCACTACCAGATGGACCTGCGTTGTATTAGCTAGTTGGTGAGGTAACGGCTCACCAAGGCGACGATACATAGCCGACCTGAGAGGGTGATCGGCCACACTGGGACTGAGACACGGCCCAG	0	0	0	0.221976	0	0	Firmicutes	Bacilli	Lactobacillales	Streptococcaceae	Streptococcus	Streptococcus
203	GATGAACGCTAGCTACAGGCTTAACACATGCAAGTCGAGGGGCAGCATGAACTTAGCTTGCTAAGTTTGATGGCGACCGGCGCACGGGTGAGTAACACGTATCCAACCTGCCGATGACTCGGGGATAGCCTTTCGAAAGAAAGATTAATACCCGATGGCATAGTTCTTCCGCATGGTAGAACTATTAAAGAATTTCGGTCATCGATGGGGATGCGTTCCATTAGGTTGTTGGCGGGGTAACGGCCCACCAAGCCTTCGATGGATAGGGGTTCTGAGAGGAAGGTCCCCCACATTGGAACTGAGACACGGTCCAA	0.168209	0	0	0	0.0517777	0	Bacteroidetes	Bacteroidia	Bacteroidales	Bacteroidaceae	Bacteroides	Bacteroides_uniformis
204	GACGAACGCTGGCGGCGTGCCTAATACATGCAAGTCGAGCGAAGTTTTTCTGGTGCTTGCACTAGAAAAACTTAGCGGCGAACGGGTGAGTAACACGTAAAGAACCTGCCTCATAGACTGGGACAACTATTGGAAACGATAGCTAATACCGGATAACAGTATTTCTCGCATGAGAGATATTTAAAAGTTGGTTATGCTAACACTATGAGATGGCTTTGCGGTGCATTAGCTAGTTGGTGGGGTAAAGGCCCACCAAGGCGACGATGCATAGCCGACCTGAGAGGGTGATCGGCCACACTGGGACTGAGACACGGCCCAG	0	0	0.20724	0	0	0	Firmicutes	Bacilli	Bacillales	Bacillales_Incertae_Sedis_XI	Gemella	Gemella_morbillorum
205	GATGAACGCTGACAGAATGCTTAACACATGCAAGTCAACTTGAATTTGGGTTTATAACTTAGGTTTGGGTGGCGGACGGGTGAGTAACGCGTAAAGAACTTGCCTCACAGCTAGGGACAACATTTAGAAATGAATGCTAATACCTGATATTATGGTTATAGGGCATCCTATAATTATGAAAGCTAAATGCACTGTGAGAGAGCTTTGCGTCCCATTAGCTAGTTGGAGAGGTAACAGCTCACCAAGGCGATGATGGGTAGCCGGCCTGAGAGGGTGAACGGCCACAAGGGGACTGAGACACGGCCCTT	0	0	0.20724	0	0	0	Fusobacteria	Fusobacteriia	Fusobacteriales	Fusobacteriaceae	Fusobacterium	Fusobacterium_nucleatum_subsp._animalis
206	GATGAACGCTGGCGGCGTGCTTAACACATGCAAGTCGAACGAAGCACCTTGATTCGATTCTTCGGATGAAGATCTTGGTGACTGAGTGGCGGACGGGTGAGTAACGCGTGGGTAACCTGCCTCATACAGGGGGATAACAGTTAGAAATGACTGCTAATACCGCATAAGACCACAGCACCGCATGGTGCAGGGGTAAAAACTCCGGTGGTATGAGATGGACCCGCGTCTGATTAGGTAGTTGGTGGGGTAACGGCCTACCAAGCCGACGATCAGTAGCCGACCTGAGAGGGTGACCGGCCACATTGGGACTGAGACACGGCCCAG	0	0	0.20724	0	0	0	Firmicutes	Clostridia	Clostridiales	Lachnospiraceae	Mediterrabeibacter	Mediterrabeibacter
207	GATGAACGCTGGCGGCGTGCCTAACACATGCAAGTCGAGCGAACCCTTCGGGGTGAGCGGCGGACGGGTGAGTAACGCGTGGGTAACCTGCCCTGTACACACGGATAACATACCGAAAGGTATGCTAATACGAGATAATATATTTTAATCGCATGGTTAAGATATCAAAGCTCCGGCGGTACAGGATGGACCCGCGTCTGATTAGCTAGTTGGTGAGGTAATGGCTCACCAAGGCGACGATCAGTAGCCGACCTGAGAGGGTGATCGGCCACACTGGAACTGAGACACGGTCCAG	0	0	0.20724	0	0	0	Firmicutes	Clostridia	Clostridiales	Peptostreptococcaceae	Romboutsia	Romboutsia
208	AGTGAACGCTGGCGGCAGGCCTAACACATGCAAGTCGAACGGCAGCACAGGGGAGCTTGCTCCCTGGGTGGCGAGTGGCGGACGGGTGAGGAATACGTCGGAATCTGCCTTTTTGTGGGGGATAACGTAGGGAAACTTACGCTAATACCGCATACGACCTTCGGGTGAAAGTGGGGGACCGCAAGGCCTCACGCAGATAGATGAGCCGACGTCGGATTAGCTAGTTGGTGGGGTAATGGCCCACCAAGGCGACGATCCGTAGCTGGTCTGAGAGGATGATCAGCCACACTGGAACTGAGACACGGTCCAG	0	0	0.20724	0	0	0	Proteobacteria	Gammaproteobacteria	Xanthomonadales	Xanthomonadaceae	unclassified_Xanthomonadaceae	Xanthomonadaceae
209	GATGAACGCTGGCGGCGTGCCTAATACATGCAAGTCGAGCGAACAGACGAGGAGCTTGCTCCTTTGACGTTAGCGGCGGACGGGTGAGTAACACGTGGATAACCTACCTATAAGACTGGGATAACTTCGGGAAACCGGAGCTAATACCGGATAACATGTTGAACCGCATGGTTCAACAGTGAAAGACGGTCTTGCTGTCACTTATAGATGGATCCGCGCCGCATTAGCTAGTTGGTAAGGTAACGGCTTACCAAGGCAACGATGCGTAGCCGACCTGAGAGGGTGATCGGCCACACTGGAACTGAGACACGGTCCAG	0	0	0	0	0	0.205872	Firmicutes	Bacilli	Bacillales	Staphylococcaceae	Staphylococcus	Staphylococcus_capitis/epidermidis/caprae
210	GATGAACGCTAGCTACAGGCTTAACACATGCAAGTCGAGGGGCAGCGGGTTGAAAGCTTGCTTTCAATGCCGGCGACCGGCGCACGGGTGCGTAACGCGTATCAAACCTGCCTCATACTCGGGGATAGCCTTGCGAAAGTAAGATTAATACCCGATGTTGTTGCTTTCTCGCATGGGAGAGTAACCAAAGATTTATCGGTATGAGATGGTGATGCGTCCGATTAGGTAGTAGGCGGGGTAACGGCCCACCTAGCCTTCGATCGGTAGGGGTTCTGAGAGGAAGGTCCCCCACACTGGAACTGAGACACGGTCCAG	0	0	0.193424	0	0	0	Bacteroidetes	Bacteroidia	Bacteroidales	Prevotellaceae	Prevotellamassilia	Prevotellamassilia
211	GACGAACGCTGGCGGCGTGCTTAACACATGCAAGTCGAACGGTAAGGCCCTTTCGGGGGTACACGAGTGGCGAACGGGTGAGTAACACGTGAGTAACCTGCCCTTGACTCTGGGATAACATCTGGAAACAGGTGCTAATACCGGATATGAACCCTGGACTCATGTTTGGGGTTGGAAAGCTCCGGCGGTCATGGATGGACTCGCGGCCTATCAGCTTGTTGGTGAGGTAATGGCTCACCAAGGCTTCGACGGGTAGCCGGCCTGAGAGGGCGACCGGCCACATTGGGACTGAGATACGGCCCAA	0	0	0.193424	0	0	0	Actinobacteria	Actinobacteria	Propionibacteriales	Propionibacteriaceae	Tessaracoccus	Tessaracoccus
212	GACGAACGCTGGCGGCGTGCTTAACACATGCAAGTCGAACGGTGAAGCTCAAGCTTGCTTGGGTGGATCAGTGGCGAACGGGTGAGTAACACGTGAGCAACCTGCCCCGGACTCTGGAATAAGCGCTGGAAACGGCGTCTAATACTGGATATGACACCAATCCGCATGGGTATGGTGTGGAAAGTTTTTCGGTCTGGGATGGGCTCGCGGCCTATCAGCTTGTTGGTGAGGTAATGGCTCACCAAGGCGACGACGGGTAGCCGGCCTGAGAGGGCGACCGGCCACACTGGGACTGAGACACGGCCCAG	0	0	0.179608	0	0	0	Actinobacteria	Actinobacteria	Micrococcales	Intrasporangiaceae	Janibacter	Janibacter_anophelis
213	GATGAACGCTGGCTACAGGCTTAACACATGCAAGTCGAGGGGAAACGGCATTGAGTGCTTGCACTGAATGGACGTCGACCGGCGCACGGGTGAGTAACGCGTATCCAACCTTCCCGTTACTGCGGGATAACCTGCCGAAAGGCAGACTAATACCGCATGTTCTTCGATGACGGCATCAGATTCGAAGCAAAGATTCTTCGGTAACGGAGGGGGATGCGTCTGATTAGCTAGTTGGCGGGGCGACGGCCCACCAAGGCGACGATCAGTAGGGGTTCTGAGAGGAAGGTCCCCCACATTGGAACTGAGACACGGTCCAA	0	0	0.179608	0	0	0	Bacteroidetes	Bacteroidia	Bacteroidales	Prevotellaceae	Prevotella	Prevotella_denticola
214	GATGAACGCTGGCGGCGTGCCTAATACATGCAAGTCGAGCGAACAGACAAGGAGCTTGCTCCTTTGACGTTAGCGGCGGACGGGTGAGTAACACGTGGGTAACCTACCTATAAGACTGGGATAACTTCGGGAAACCGGAGCTAATACCGGATAATATTTCGAACCGCATGGTTCGATAGTGAAAGATGGTTTTGCTATCACTTATAGATGGACCCGCGCCGTATTAGCTAGTTGGTAAGGTAACGGCTTACCAAGGCGACGATACGTAGTCGACCTGAGAGGGTGATCGGCCACACTGGAACTGAGACACGGTCCAG	0	0	0.179608	0	0	0	Firmicutes	Bacilli	Bacillales	Staphylococcaceae	Staphylococcus	Staphylococcus_haemolyticus/devriesei
215	ATTGAACGCTGGCGGCAGGCTTAACACATGCAAGTCGAACGGTAACATAAAGAAGCTTGCTTCTTTGATGACGAGTGGCGGACGGGTGAGTAATGCTTGGGAATCTAGCTTATGGAGGGGGATAACTACGGGAAACTGTAGCTAATACCGCGTAATATCGAGAGATTAAAGTGTGGGACCTTCGGGCCACATGCCATAGGATGAGCCCAAGTGGGATTAGGTAGTTGGTGAGGTAAAGGCTCACCAAGCCGACGATCTCTAGCTGGTCTGAGAGGATGACCAGCCACACTGGGACTGAGACACGGCCCAG	0	0.170358	0	0	0	0	Proteobacteria	Gammaproteobacteria	Pasteurellales	Pasteurellaceae	Haemophilus	Haemophilus_parainfluenzae
216	GACGAACGCTGGCGGCGTGCTTAACACATGCAAGTCGAACGGGCCCGCCCCTGTTTTTGGGGGTGGGTTGAGTGGCGAACGGGTGAGTATCACGTGAGTAACCTGCCCCCTGCTCCTGGATAACTGCTTGAAAGGGCGGCTAATACGGGGTGTGCCGGCTGGTCCGCATGGGCCTGGTCGGGATAGTTTCATCTTCGGGTGTTTCGGTGGGGGATGGGCTCGCGGCCTATCAGCTTGTTGGTGGGGTGATGGCCCACCAAGGCGGTGACGGGTAGCCGGCCTGAGAGGGTGGGCGGCCACACTGGGACTGAGACACGGCCCAG	0	0	0	0.166482	0	0	Actinobacteria	Actinobacteria	Actinomycetales	Actinomycetaceae	Actinomyces	Actinomyces_orihominis/dentalis
217	GACGAACGCTGGCGGCGTGCCTAATACATGCAAGTCGAGCGGAGAATTTAAAAGCTTGCTTTTAAATTCTTAGCGGCGGACGGGTGAGTAACACGTAGGCAACCTGCCTCATAGACTGGGACAACTTCGGGAAACCGGAGCTAATACCGGATAACATTTTTCTTTGCATAAAGAGAAATTAAAAGTTGGCGTAAGCTAACACTATGAGATGGGCCTGCGGCGCATTAGCTAGTTGGTGAGGTAACGGCTCACCAAGGCGACGATGCGTAGCCGACCTGAGAGGGTGATCGGCCACACTGGGACTGAGACACGGCCCAG	0	0	0	0.166482	0	0	Firmicutes	Bacilli	Bacillales	Bacillaceae1	unclassified_Bacillaceae1	Bacillaceae1
218	AGTGAACGCTGGCGGCGTGCCTAATACATGCAAGTCGAACGGACAAGTAAGAGCTTGCTCTTATGAGTTAGTGGCGCACGGGTGAGTAATGTATAGCTAATCTGCCCTACACTAGAGGACAACAGTTGGAAACGGCTGCTAATACTCTATACTCCTGTCTTACATAAGTTAGATAGGGAAAGTTTTTCGGTGTAGGATGAGGCTATATTGTATCAGCTAGTTGGTGAGGTAATGGCTCACCAAGGCTATGACGCATAACTGGTCTGAGAGGATGATCAGTCACACTGGAACTGAGACACGGTCCAG	0	0	0	0.166482	0	0	Campylobacterota	Campylobacteria	Campylobacterales	Campylobacteraceae	Campylobacter	Campylobacter_concisus
219	GATGAACGCTGGCGGCGTGCCTAATACATGCAAGTCGAACGAAGAAGTAAGCTTGCTTACTTCTTAGTGGCGAACGGGTGAGTAATACATAAGCAATCTGCCCATATGCCTGGGATAACCGTTGGAAACGATGGCTAATACCGGATAGGTGAATTGAAGGCATCTTTGATTCATTAAAGTTGGGATACAACACATATGGATGAGCTTATGGCGCATTAGCTAGTTGGTGAGGTAACGGCTCACCAAGGCGATGATGCGTAGCCGACCTGAGAGGGTGACCGGCCACACTGGGACTGAGACACGGCCCAG	0	0	0	0.166482	0	0	Firmicutes	Erysipelotrichia	Erysipelotrichales	Erysipelotrichaceae	unclassified_Erysipelotrichaceae	Erysipelotrichaceae
220	GATGAACGCTAGCGACAGGCTTAACACATGCAAGTCGAGGGGCAGCAATTTGTAGCAATACAAAGTTGGCGACCGGCGCACGGGTGAGTAACGCGTATGCAACCTACCTACAACAGAAGAATAATCCGGCGAAAGTCGGTCTAATACTTCATAAAACAGGGACACTGCATGGTGTTATTTGTTAAAGATTTATCGGTTGTAGATGGGCATGCGTACCATTAGGTAGTTGGTGAGGTAATGGCCCACCAAGCCTACGATGGTTAGGGGTTCTGAGAGGAAAGTCCCCCACACTGGTACTGAGACACGGACCAG	0	0	0	0.166482	0	0	Bacteroidetes	Bacteroidia	Bacteroidales	Porphyromonadaceae	Tannerella	Tannerella
221	GACGAACGCTGGCGGCGTGCTTAACACATGCAAGTCGAACGGACAGACAGAGAGCTTGCTCTCTTGAAGTTAGTGGCGAACGGGTGAGTAACGCGTAATCAACCTGCCCTTCAGAGGGGGATAACAACGGGAAACCGTTGCTAATACCGCGTACGATTCATAGGCGGCATCGCTTGTGAATGAAAGGTGGCCTCTATATATAAGCTATCGCTGAAGGAGGGGATTGCGTCTGATTAGCTAGTTGGAGGGGTAACGGCCCACCAAGGCAATGATCAGTAGCCGGTCTGAGAGGATGAACGGCCACATTGGGACTGAGACACGGCCCAA	0	0	0	0.166482	0	0	Firmicutes	Negativicutes	Veillonellales	Veillonellaceae	Veillonella	Veillonella
222	GATGAACGCTAGCTACAGGCTTAACACATGCAAGTCGAGGGGCAGCATGGTCTTAGCTTGCTAAGGCCGATGGCGACCGGCGCACGGGTGAGTAACACGTATCCAACCTGCCGTCTACTCTTGGACAGCCTTCTGAAAGGAAGATTAATACAAGATGGCATCATGAGTTCACATGTTCACATGATTAAAGGTATTCCGGTAGACGATGGGGATGCGTTCCATTAGATAGTAGGCGGGGTAACGGCCCACCTAGTCTTCGATGGATAGGGGTTCTGAGAGGAAGGTCCCCCACATTGGAACTGAGACACGGTCCAA	0	0	0.165792	0	0	0	Bacteroidetes	Bacteroidia	Bacteroidales	Bacteroidaceae	Phocaeicola	Phocaeicola_vulgatus
223	GACGAACGCTGGCGGCGTGCTTAACACATGCAAGTCGAGCGGTAAGGCCCTTTCGGGGGTACACGAGCGGCGAACGGGTGAGTAACACGTGAGTAATCTGCCCTTCACTTCGGGATAACTACCGGAAACGGTGGCTAATACCGGATATGACCACTTCATGCATGTGATGGTGGTGGAAAGTGTTTAGCGGTGGGGGATGTGCTCGCGGCCTATCAGCTTGTTGGTGAGGTAATGGCTCACCAAGGCTTCGACGGGTAGCCGGCCTGAGAGGGTGACCGGCCACACTGGGACTGAGACACGGCCCAG	0	0	0.165792	0	0	0	Actinobacteria	Actinobacteria	Propionibacteriales	Nocardioidaceae	Nocardioides	Nocardioides
224	GATGAACGCTAGCTACAGGCTTAACACATGCAAGTCGTGGGGCAGCGGATACTTAGCTTGCTAAGTATGCCGGCGACCGGCGCACGGGTGAGTAACGCGTACCGAACCTGCCCATCACACAGGGATAGGCTTGCGAAAGCAAGATTAATACCTGATGGTCTCAGTTGTATGCATGTATAATTGAGTAAAGCCTTCGGGCGGTGATGGATGGCGGTGCGTCCCATTAGGAAGTTGGCGGGGTAACGGCCCACCAATCCTTCGATGGGTAGGGGTTCTGAGAGGAAGGTCCCCCACATTGGAACTGAGATACGGTCCAA	0	0	0.165792	0	0	0	Bacteroidetes	Bacteroidia	Bacteroidales	Prevotellaceae	Alloprevotella	Alloprevotella_tannerae
225	GACGAACGCTGGCGGCGTGCTTAACACATGCAAGTCGAACGGAAAGGCCCTGCTTGCAGGGTACTCGAGTGGCGAACGGGTGAGTAACACGTGGGTGATCTGCCCTTAACTTCGGGATAAGCTTGGGAAACTGGGTCTAATACCGGATAGGACCACACTTTAGTGTGTGTGGTGGAAAGATATTGTTTCGGTTGGGGATGAGCTCGCGGCCTATCAGCTTGTTGGTGGGGTAATGGCCTACCAAGGCGGCGACGGGTAGCCGGCCTGAGAGGGTGGACGGCCACATTGGGACTGAGATACGGCCCAG	0	0	0	0	0	0.165593	Actinobacteria	Actinobacteria	Mycobacteriales	Corynebacteriaceae	Corynebacterium	Corynebacterium
226	ATTGAACGCTGGCGGCATGCCTTACACATGCAAGTCGAACGGCAGCACGGGAGCAATCCTGGTGGCGAGTGGCGAACGGGTGAGTAATATATCGGAACATACCCAGTAGCGGGGGATAACGTACCGAAAGGTACGCTAATACCGCATACGCCCTACGGGGGAAAGGGGGGGATCGCAAGACCTCTCACTATTGGAATGGCCGATATCGGATTAGCTAGTTGGTGAGGTAAAGGCTCACCAAGGCGACGATCCGTAGCTGGTCTGAGAGGACGACCAGCCACACTGGGACTGAGACACGGCCCAG	0	0	0	0	0	0.165593	Proteobacteria	Betaproteobacteria	Nitrosomonadales	Gallionellaceae	unclassified_Gallionellaceae	Gallionellaceae
227	GATGAACGCTGGCGGCGTGCTTAACACATGCAAGTCGAACGAAGCACTTTATTTGATTTCCTTCGGGACTGATTATTTTGTGACTGAGTGGCGGACGGGTGAGTAACGCGTGGGTAACCTGCCTTGTACAGGGGGATAACAGTTGGAAACGGCTGCTAATACCGCATAAGCGCACGGCATCGCATGATGCAGTGTGAAAAACTCCGGTGGTATAAGATGGACCCGCGTTGGATTAGCTAGTTGGTGAGGTAACGGCCCACCAAGGCGACGATCCATAGCCGACCTGAGAGGGTGACCGGCCACATTGGGACTGAGACACGGCCCAA	0	0	0	0	0.155333	0	Firmicutes	Clostridia	Clostridiales	Lachnospiraceae	Agathobacter	Agathobacter_rectale
228	GATGAACGCTGGCGGCGTGCTTAACACATGCAAGTCGAACGAAGCACTTTACCTGATCCCTTCGGGGTGATTGTTCTGTGACTGAGTGGCGGACGGGTGAGTAACGCGTGGGTAACCTGCCTCATACAGGGGGATAACAGTTGGAAACGACTGCTAATACCGCATAAGCGCACAGCATCGCATGATGCAGTGTGAAAAACTCCGGTGGTATGAGATGGACCCGCGTTGGATTAGCTAGTTGGAGGGGTAACGGCCCACCAAGGCGACGATCCATAGCCGACCTGAGAGGGTGACCGGCCACATTGGGACTGAGACACGGCCCAA	0	0	0.151976	0	0	0	Firmicutes	Clostridia	Clostridiales	Lachnospiraceae	Agathobacter	Agathobacter
229	GATGAACGCTGGCGGCGTGCTTAACACATGCAAGTCGAACGATGAAGCTGGGTGCTTGCACTTGGTGGATTAGTGGCGAACGGGTGAGTAACACGTGAGCAACCTGCCCCTGACTCTGGGATAAGCGCTGGAAACGGCGTCTAATACCGGATATGTACCGTGGTCGCATGATCTGCGGTTGGAAAGATTTTTCGGTTGGGGATGGGCTCGCGGCCTATCAGCTTGTTGGTGAGGTAATGGCTCACCAAGGCGTCGACGGGTAGCCGGCCTGAGAGGGTGACCGGCCACACTGGGACTGAGACACGGCCCAG	0	0	0.151976	0	0	0	Actinobacteria	Actinobacteria	Micrococcales	Microbacteriaceae	Microbacterium	Microbacterium
230	AACGAACGCTGGCGGCGCGTCTTAAGCATGCAAGTCGAACGGCAAGAGAGGAGCTTGCTTCTCTCCTAGAGTGGCGGACTGGTGAGGAACACGTGGGTAATCTACCCTTAAGATGGGGATAGCTGCTAGAAATAGCAGGTAATACCGAATACACTCGGCATATCACAAGAGATGTTGAGGAAAGGAAGCTACGGCTTCGCTTGAGGATGAGCTTGCGTCCCATTAGCTAGTTGGTGAGGTAAAGGCCCACCAAGGCGACGATGGGTATCCGGCCTGAGAGGGTGAACGGACACATTGGGACTGAGATACGGCCCAA	0	0	0.151976	0	0	0	Spirochaetes	Spirochaetia	Spirochaetales	Spirochaetaceae	Treponema	Treponema_medium
231	GACGAACGCTGGCGGCGTGCCTAATACATGCAAGTAGAACGCACAGGATGCACCGTAGTTTACTACACCGTATTCTGTGAGTTGCGAACGGGTGAGTAACGCGTAGGTAACCTGCCTGGTAGCGGGGGATAACTATTGGAAACGATAGCTAATACCGCATAAGAACATTTACTGCATGGTAGATGTTTAAAAGGTGCAAGAGCATCACTACCAGATGGACCTGCGTTGTATTAGCTAGTTGGTGGGGTAACGGCTCACCAAGGCAACGATACATAGCCGACCTGAGAGGGTGATCGGCCACACTGGGACTGAGACACGGCCCAG	0	0	0.151976	0	0	0	Firmicutes	Bacilli	Lactobacillales	Streptococcaceae	Streptococcus	Streptococcus_intermedius/constellatus
232	GATGAACGCTGGCGGCGTGCCTAATACATGCAAGTCGAGCGAACAGACGGGGAGCTTGCTCCCCCGACGTTAGCGGCGGACGGGTGAGTAACACGTGGGTAACCTACCTATAAGACTGGAATAACTCCGGGAAACCGGGGCTAATGCCGGATAACATGTTGGACCGCATGGTCCTACAGTGAAAGACGGTCTTGCTGTCACTTATAGATGGACCCGCGCCGTATTAGCTAGTTGGTAAGGTAACGGCTTACCAAGGCAACGATACGTAGCCGACCTGAGAGGGTGATCGGCCACACTGGAACTGAGACACGGTCCAG	0	0	0	0	0	0.147691	Firmicutes	Bacilli	Bacillales	Staphylococcaceae	Staphylococcus	Staphylococcus_pettenkoferi
233	GATGAACGCTAGCTACAGGCTTAACACATGCAAGTCGAGGGGCAGCGCAGTGTAGCAATACATGGGCGGCGACCGGCGCACGGGTGCGTAACGCGTATCCAACCTTCCCGTTACTCAGGGATAGCCTTCCGAAAGGGAGATTAATACCTGATGGTGTTCAAATTCCGCATGTTATTTGAACTAAAGATTTATCGGTAACGGATGGGGATGCGTGACATTAGGTAGATGGCGGGGTAACGGCCCACCATGCCTACGATGTCTAGGGGTTCTGAGAGGAAGGTCCCCCACACTGGAACTGAGACACGGTCCAG	0	0	0.13816	0	0	0	Bacteroidetes	Bacteroidia	Bacteroidales	Bacteroidaceae	Phocaeicola	Phocaeicola
234	GATGAACGCTAGCGGCAGGCCTAACACATGCAAGTCGAGGGGTATATAATGCTTGCATTATAGAGACCGGCGCACGGGTGAGTAACGCGTATGGAATCTGCCTTGTACAGGGGAATAGCCCAGGGAAACTTGGATTAATGCCCCATAGTATTATGAGACGGCATTGTTTTATAATTAAAGATTTATCGGTACAAGATGATCATGCGTCCCATTAGCTTGTTGGTGTGGTAACGGCACACCAAGGCTACGATGGGTAGGGGCCCTGAGAGGGGGATCCCCCACACTGGTACTGAGACACGGACCAG	0	0	0.13816	0	0	0	Bacteroidetes	Flavobacteriia	Flavobacteriales	Flavobacteriaceae	Aequorivita	Aequorivita
235	ATTGAACGCTGGCGGCATGCTTTACACATGCAAGTCGGACGGCAGCACAGAGAAGCTTGCTTCTTGGGTGGCGAGTGGCGAACGGGTGAGTAACATATCGGAACGTACCGAGTAATGGGGGATAACTAATCGAAAGATTAGCTAATACCGCATATTCTCTGAGGAGGAAAGCAGGGGACCTTCGGGCCTTGCGTTATTCGAGCGGCCGATATCTGATTAGCTAGTTGGTGGGGTAAAGGCCTACCAAGGCGACGATCAGTAGCGGGTCTGAGAGGATGATCCGCCACACTGGGACTGAGACACGGCCCAG	0	0	0.13816	0	0	0	Proteobacteria	Betaproteobacteria	Neisseriales	Neisseriaceae	Neisseria	Neisseria_perflava/subflava/flavescens
236	GATGAACGCTAGCGGCAGGCCTAATACATGCAAGTCGAACGGGATTCCAGTGTAGCTTGCTATACTGGATGAGAGTGGCGTACGGGTGCGTAACGCGTGAGCAACCTACCCATATCAGGGGGATAGCCCGGAGAAATCCGGATTAACACCGCATAATATTACTGAATGGCCTCATTTAGTAATCAAATATTTATAGGATATGGATGGGCTCGCGTGACATTAGCTAGTTGGTCAGGTAACGGCTTACCAAGGCTACGATGTCTAGGGGCTCTGAGAGGAGAATCCCCCACACTGGTACTGAGACACGGACCAG	0	0	0.13816	0	0	0	Bacteroidetes	Sphingobacteriia	Sphingobacteriales	Sphingobacteriaceae	Sphingobacterium	Sphingobacterium
237	GATGAACGCTAGCTACAGGCTTAACACATGCAAGTCGAGGGGCAGCATGGTCTTAGCTTGCTAAGGCTGATGGCGACCGGCGCACGGGTGAGTAACACGTATCCAACCTGCCGTCTACTCTTGGCCAGCCTTCTGAAAGGAAGATTAATCCAGGATGGGATCATGAGTTCACATGTCCGCATGATTAAAGGTATTTTCCGGTAGACGATGGGGATGCGTTCCATTAGATAGTAGGCGGGGTAACGGCCCACCTAGTCAACGATGGATAGGGGTTCTGAGAGGAAGGTCCCCCACATTGGAACTGAGACACGGTCCAA	0	0	0	0	0.138074	0	Bacteroidetes	Bacteroidia	Bacteroidales	Bacteroidaceae	Phocaeicola	Phocaeicola_dorei
238	ATTGAACGCTGGCGGCATGCCTTACACATGCAAGTCGAACGGCAGCACGGACTTCGGTCTGGTGGCGAGTGGCGAACGGGTGAGTAATACATCGGAACGTGCCCTGTCGTGGGGGATAACTAGTCGAAAGATTAGCTAATACCGCATACGACCTGAGGGTGAAAGCGGGGGACCGCAAGGCCTCGCGCGATAGGAGCGGCCGATGTCTGATTAGCTAGTTGGTGGGGTAAAGGCCCACCAAGGCGACGATCAGTAGCTGGTCTGAGAGGACGATCAGCCACACTGGGACTGAGACACGGCCCAG	0	0	0	0	0	0.129789	Proteobacteria	Betaproteobacteria	Burkholderiales	Burkholderiaceae	Cupriavidus	Cupriavidus_basiliensis/necator
239	GACGAACGCTGGCGGCGTGCCTAATACATGCAAGTCGAACGAACGGATTGAGGAGCTTGCTCTTCAAGAAGTTAGTGGCGGACGGGTGAGTAACACGTGGGTAACCTGCCCTTCAGCGGGGGATAACATCCGGAAACGGGTGCTAATACCGCATAGTTTCTTTTTCCGCCTGGAAGAAGAAGGAAAGATGGCCTTTGTGCTATCACTGAGGGATGGACCCGCGGCGTATTAGTTAGTTGGTGGGGTAATGGCCTACCAAGACGATGATACGTAGCCGACCTGAGAGGGTGATCGGCCACATTGGGACTGAGACACGGCCCAA	0	0	0.124344	0	0	0	Firmicutes	Bacilli	Lactobacillales	Carnobacteriaceae	Jeotgalibaca	Jeotgalibaca
240	GATGAACGCTGACAGAATGCTTAACACATGCAAGTCAACTTGAATTTGGGTTTTTAACTTAGATTTGGGTGGCGGACGGGTGAGTAACGCGTAAAGAACTTGCCTCACAGCTAGGGACAACATTTAGAAATGAATGCTAATACCTGATATTATGATTTTAAGGCATCTTAGAATTATGAAAGCTATATGCACTGTGAGAGAGCTTTGCGTCCCATTAGCTAGTTGGAGAGGTAACGGCTCACCAAGGCGATGATGGGTAGCCGGCCTGAGAGGGTGAACGGCCACAAGGGGACTGAGACACGGCCCTT	0	0	0.124344	0	0	0	Fusobacteria	Fusobacteriia	Fusobacteriales	Fusobacteriaceae	Fusobacterium	Fusobacterium_nucleatum_subsp._animalis
241	GACGAACGCTGGCGGCGTGCTTAACACATGCAAGTCGAACGCTGAAGCCCAGCTTGCTGGGTGGATGAGTGGCGAACGGGTGAGTAACACGTGAGTAACCTGCCCTTCACTTCAGGATAACTCCGGGAAACCGGTGCTAATACTGGATATGACTCCTGCCTGCATGGGTGGGGGTGGAAAGATTTATCGGTGATGGATGGACTCGCGGCCTATCAGCTTGTTGGTGGGGTAATGGCCTACCAAGGCGACGACGGGTAGCCGGCCTGAGAGGGTGACCGGCCACACTGGGACTGAGACACGGCCCAG	0	0	0.124344	0	0	0	Actinobacteria	Actinobacteria	Micrococcales	Intrasporangiaceae	Ornithinimicrobium	Ornithinimicrobium
242	GATGAACGCTGGCGGCGTGCCTAACACATGCAAGTCGAGCGAACCCTTCGGGGTGAGCGGCGGACGGGTGAGTAACGCGTGGGTAACCTGCCCTATACACACGGATAACGTACCGAAAGGTACGCTAATACGAGATAACATATTTTTATCGCATGGTAGAAATATCAAAGCTCCAGCGGTATAGGATGGACCCGCGTCTGATTAGCTAGTTGGTAAGGTAATGGCTTACCAAGGCGACGATCAGTAGCCGACCTGAGAGGGTGATCGGCCACATTGGAACTGAGACACGGTCCAA	0	0	0.124344	0	0	0	Firmicutes	Clostridia	Clostridiales	Peptostreptococcaceae	Romboutsia	Romboutsia
243	GACGAACGCTGGCGGCGCGCCTAACACATGCAAGTCGAACGGAGCTTAGAGAGCTTGCTTTTTAAGCTTAGTGGCGAACGGGTGAGTAACGCGTGAGTAACCTGCCCTAGAGTGGGGGACAACAGTTGGAAACGACTGCTAATACCGCATAAGCCCACGGTACCGCATGGTACTGAGGGAAAAGGATTTATTCGCTTTAGGATGGACTCGCGTCCAATTAGCTAGTTGGTGAGGTAACGGCCCACCAAGGCGACGATTGGTAGCCGGACTGAGAGGTTGAACGGCCACATTGGGACTGAGACACGGCCCAG	0	0	0	0	0.120815	0	Firmicutes	Clostridia	Clostridiales	Ruminococcaceae	unclassified_Ruminococcaceae	Ruminococcaceae
244	GACGAACGCTGGCGGCGTGCTTAACACATGCAAGTCGAACGGTGAAGGGACAAGTCGAACGGTGACCTCGGAGCTTGCTCCGGGTGATCAGTGGCGAACGGGTGAGTAACACGTGAGTAACCTGCCCCTTTCTCTGGGATAACTCCGGGAAACCGGTGCTAATACTGGATACGACCCGAGCGGGCATCCGCATCGGGTGGAAAGTTTTTCGGTAAGGGATGGACTCGCGGCCTATCAGCTTGTTGGTGGGGTAATGGCCCACCAAGGCGACGACGGGTAGCCGGCCTGAGAGGGCGACCGGCCACACTGGGACTGAGACACGGCCCAG	0	0	0	0.110988	0	0	Actinobacteria	Actinobacteria	Micrococcales	Intrasporangiaceae	Ornithinicoccus	Ornithinicoccus_hortensis
245	GACGAACGCTGGCGGCGTGCTTAACACATGCAAGTCGAACGCTGAAGCACCAGCTTGCTGGTGTGGATGAGTGGCGAACGGGTGAGTAACACGTGAGCAACCTGCCCCTGACTCTGGGATAAGCGCTGGAAACGGCGTCTAATACTGGATACGACCTTCAGTCGCATGGCTAGGAGGTGGAAAGTTTTTCGGTTGGGGATGGGCTCGCGGCCTATCAGCTTGATGGTGAGGTAATGGCTCACCATGGCGACGACGGGTAGCCGGCCTGAGAGGGTGACCGGCCACACTGGGACTGAGACACGGCCCAG	0	0	0	0.110988	0	0	Actinobacteria	Actinobacteria	Micrococcales	Microbacteriaceae	Leucobacter	Leucobacter
246	GACGAACGCTGGCGGCGTGCTTAACACATGCAAGTCGAGCGAAGGAATACTTAGGAAGCCTTCGGGAAGAATACGTATTCCTTAGCGGCGGACGGGTGAGTAACGCGTGAGGAATCTGCCTCGCACAAGGGGATAGCCTCGGGAAACCGGGATTAATACCCTATGATACTTACACTGCGCATGCAGAGTAAGTTAAAGAATATCGGTGTGAGATGACCTCGCGTCCCATTAGCTGGTTGGCAGGGTAAAAGCCTACCAAGGCGACGATGGGTAGCCGGCCTGAGAGGGTGAACGGCCACATTGGAACTGAGACACGGTCCAG	0	0	0	0.110988	0	0	Firmicutes	Clostridia	Clostridiales	Peptoniphilaceae	Peptoniphilus	Peptoniphilus
247	GATGAACGCTAGCGATAGGCTTAACACATGCAAGTCGAGGGGCAGCATTATTTTAGCTTGCTAAGATAGATGGCGACCGGCGCACGGGTGCGTAACGCGTATGCAACCTGCCTGTAATTAGGGAATAACCCGGTGAAAGTCGGACTAATACCCTATATTCTTCTTTCTCCGCATGGAGGAGGACGGAAAGATTTATTGATTACAGATGGGCATGCGTCCCATTAGCTGGTTGGTAAGGTAACGGCTTACCAAGGCAACGATGGGTAGGGGGACTGAGAGGTTGACCCCCCACACTGGTACTGAGACACGGACCAG	0	0	0	0.110988	0	0	Bacteroidetes	Bacteroidia	Bacteroidales	Porphyromonadaceae	Porphyromonas	Porphyromonas_endodontalis
248	GACGAACGCTGGCGGCGCGCCTAACACATGCAAGTCGAACGGAGATAAGATTTCGGTTTTATCTTAGTGGCGGACGGGTGAGTAACGCGTGAGCAACCTGGCCTTTAGAGGGGGATAACGTCTGGAAACGGACGCTAATACCGCATAACGTACAGAGGCGGCATCGTTTTTGTACCAAAGGAGAAATCCGCTGAAGGATGGGCTCGCGTCCGATTAGGTAGTTGGTGAGGTAAAGGCCCACCAAGCCCGCGATCGGTAGCCGGATTGAGAGATTGGCCGGCCACATTGGGACTGAGACACGGCCCAG	0	0	0	0.110988	0	0	Firmicutes	Clostridia	Clostridiales	Ruminococcaceae	Ethanoligenens	Ethanoligenens
249	GACGAACGCTGGCGGCGCGCCTAACACATGCAAGTCGAACGGAGACACTCTGTTCACTGAATGGTAGGAAGGCGGCGTGTCAGTATGGGACGTCGCGTTTTCTACTGTTGAGTGAATAGAGTGTCTTAGTGGCGGACGGGTGAGTAACGCGTGAGCAACCTGCCATACAGTGGGGAATAACACACCGAAAGGTGTGCTAATACCGCATGATGTGTCGAGATCGCATGGTCTTGGCACCAAAGATTTATCGCTGTATGATGGGCTCGCGTCTGATTAGATAGTTGGTGAGGTAACGGCTCACCAAGTCGACGATCAGTAGCCGGACTGAGAGGTTGAACGGCCACATTGGGACTGAGACACGGCCCAG	0	0	0	0.110988	0	0	Firmicutes	Clostridia	Clostridiales	Ruminococcaceae	unclassified_Ruminococcaceae	Ruminococcaceae
250	GATGAACGCTGGCGGCGTGCCTAACACATGCAAGTCGAGCGGCAGCGCGAGTAGTTTACTACTTGGCGGCGAGCGGCGAACGGCTGAGTAACGCGTGGGAATTTGCCCCAAAGTGAGGAATAACTGCCCGAAAGGGTGGCTAATGCCGCATATGATCTTCGGATTAAAGGATTTATCCGCTTTGGGAGAAGCCCGCGTCGGATTAGGTAGTTGGTGAGGCAATGGCTCACCAAGCCGACGATCCGTAGCTGGTCTGAGAGGATGACCAGCCAGACTGGAACTGAGACACGGTCCAG	0	0	0	0.110988	0	0	Candidatus_Saccharibacteria	Saccharibacteria_genera_incertae_sedis	Saccharibacteria_genera_incertae_sedis	Saccharibacteria_genera_incertae_sedis	Saccharibacteria_genera_incertae_sedis	Saccharibacteria_genera_incertae_sedis
251	GATGAACGCTAGCTACAGGCTTAACACATGCAAGTCGAGGGGCAGCATGAACTTAGCTTGCTAAGTTTGATGGCGACCGGCGCACGGGTGAGTAACACGTATCCAACCTGCCGATGACTCGGGGATAGCCTTTCGAAAGAAAGATTAATACCCGATGGCATAGTTCTTCCGCATGGTGGAACTATTAAAGAATTTCGGTCATCGATGGGGATGCGTTCCATTAGGTTGTTGGCGGGGTAACGGCCCACCAAGCCTTCGATGGATAGGGGTTCTGAGAGGAAGGTCCCCCACATTGGAACTGAGACACGGTCCAA	0	0	0.110528	0	0	0	Bacteroidetes	Bacteroidia	Bacteroidales	Bacteroidaceae	Bacteroides	Bacteroides_uniformis
252	GACGAACGCTGGCGGCGTGCCTAATACATGCAAGTCGAACGAGAGCGACCGGTGCTTGCACTGGTCAATCTAGTGGCGAACGGGTGAGTAACACGTGGGTAACCTGCCCATCAGAGGGGGATAACATTCGGAAACGGATGCTAAAACCGCATAGGTCTTCGAACCGCATGGTTTGAAGAGGAAAAGAGGCGCAAGCTTCTGCTGATGGATGGACCCGCGGTGCATTAGCTAGTTGGTGAGGTAACGGCTCACCAAGGCCGTGATGCATAGCCGACCTGAGAGGGTGATCGGCCACATTGGGACTGAGACACGGCCCAA	0	0	0.110528	0	0	0	Firmicutes	Bacilli	Lactobacillales	Carnobacteriaceae	Granulicatella	Granulicatella_adiacens/paraadiacens
253	GATGAACGCTGGCGGCGTGCCTAATACATGCAAGTCGAGCGAACCACTTCGGTGGTGAGCGGCGAACGGGTGAGTAACACGTAGGTCATCTGCCCATCAGACGGGGACAACGATTGGAAACGATCGCTAATACCGGATAGGACGAAAGTTTAAAGGTGCTCTTGGCACCGCTGATGGATGAGCCTGCGGCGCATTAGCTAGTTGGTAGGGTAAAGGCCTACCAAGGCGACGATGCGTAGCCGACCTGAGAGGGTGAACGGCCACACTGGGACTGAGACACGGCCCAG	0	0	0.110528	0	0	0	Firmicutes	Erysipelotrichia	Erysipelotrichales	Erysipelotrichaceae	Turicibacter	Turicibacter
254	AACGAACGCTGGCGGCAGGCTTAACACATGCAAGTCGAGCGCCCCGCAAGGGGAGCGGCAGACGGGTGAGTAACGCGTGGGAATCTACCTAGCTCTACGGAATAACCCAGGGAAACTTGGACTAATACCGTATACGTCCTTCGGGAGAAAGATTTATCGGAGTTGGATGAGCCCGCGTTGGATTAGCTAGTTGGTGGGGTAATGGCCTACCAAGGCGACGATCCATAGCTGGTCTGAGAGGATGATCAGCCACACTGGGACTGAGACACGGCCCAG	0	0	0.110528	0	0	0	Proteobacteria	Alphaproteobacteria	Rhizobiales	Phyllobacteriaceae	Mesorhizobium	Mesorhizobium
255	GATGAACGCTAGCGGCAGGCCTAATACATGCAAGTCGAACGGGATCCAGGGGCAAGCTTGCTTGCTTCTGGTGAGAGTGGCGTACGGGTGCGTAACGCGTGAGCAACCTACCGCTGTCTGGGGGATAGCCCGGAGAAATCCGGATTAATACCGCATAACATCAGTTTACAGCATTGTTTACTGATCAAACATTTATGGGACAGCGATGGGCTCGCGTGACATTAGCTAGTTGGGGTGGTAACGGCACACCAAGGCGACGATGTCTAGGGGATCTGAGAGGATGACCCCCCACACTGGGACTGAGACACGGCCCAG	0	0	0.110528	0	0	0	Bacteroidetes	Sphingobacteriia	Sphingobacteriales	Sphingobacteriaceae	Albibacterium	Albibacterium
256	GATGAACGCTGGCGGCGTGCCTAATACATGCAAGTCGAGCGAACTGACGAGGAGCTTGCTCCTTTGACGTTAGCGGCGGACGGGTGAGTAACACGTGGGTAACCTACCTATAAGACTGGAATAACTCCGGGAAACCGGGGCTAATGCCGGATAACATATCGAACCGCATGGTTCGATAGTGAAAGACGGTCTTGCTGTCACTTATAGATGGACCCGCGCCGTATTAGCTAGTTGGTGAGGTAACGGCTCACCAAGGCGACGATACGTAGCCGACCTGAGAGGGTGATCGGCCACACTGGAACTGAGACACGGTCCAG	0	0	0.110528	0	0	0	Firmicutes	Bacilli	Bacillales	Staphylococcaceae	Staphylococcus	Staphylococcus_chromogenes
257	GACGAACGCTGGCGGCGTGCCTAACACATGCAAGTCGAGCGGGGAGGAGGAAGCTTGCTTCCGAATCCTAGCGGCGGACGGGTGAGTAACGCGTGAGCAACCTGCCTCTTACAGGGGGATAACGCATCGAAAGATGTGCTAATACCGCGTAAGACCACAGTACCGCATGGTACAGGGGTCAAAGGAGCAATCCGGTAAGAGATGGGCTCGCGTCCGATTAGCTAGTTGGTGAGATAAAAGCCCACCAAGGCGACGATCGGTAGCCGACCTGAGAGGGTGATCGGCCACATTGGAACTGAGAAACGGTCCAG	0	0	0.110528	0	0	0	Firmicutes	Clostridia	Clostridiales	unclassified_Clostridiales	unclassified_Clostridiales	Clostridiales
258	ATTGAACGCTGGCGGCAGGCCTAACACATGCAAGTCGAGCGGTAGAGAGAAGCTTGCTTCTCTTGAGAGCGGCGGACGGGTGAGTAATGCCTAGGAATCTGCCTGGTAGTGTGGGATAACGTCCGGAAACGGACGCTAATACCGCATACGTCCTACGGGAGAAAGCAGGGGACCTTCGGGCCTTGCGCTATCAGATGAGCCTAGGTCGGATTAGCTAGTTGGTGGGGTAATGGCTCACCAAGGCGACGATCCGTAACTGGTCTGAGAGGATGATCAGTCACACTGGAACTGAGACACGGTCCAG	0	0	0	0	0	0.107411	Proteobacteria	Gammaproteobacteria	Pseudomonadales	Pseudomonadaceae	Pseudomonas	Pseudomonas
259	ATTGAACGCTGGCGGCGTGCCTAACACATGCAAGTCGAGCGGCAGCGCGGGAGCAATCCTGGCGGCGAGCGGCGGACGGGTGAGCAATGCTTGGGAATCTGCCCATCAGTGGGGGACAACCCGGGGAAACTCGGGCTAATACCGCATACGTTCTTTGGAAGAAAGCAGGGGACCGCAAGGCCTTGCGCTGATGGATGAGCCCAAGTCGGATTAGCTAGTTGGTGAGGTAACGGCTCACCAAGGCGACGATCCGTAGCTGGTCTGAGAGGACGACCAGCCACACCGGAACTGAGACACGGTCCGG	0	0	0	0	0	0.107411	Proteobacteria	Gammaproteobacteria	Nevskiales	Steroidobacteraceae	unclassified_Steroidobacteraceae	Steroidobacteraceae
260	GATGAACGCTGGCGGCGTGCTTAACACATGCAAGTCGAACGGGATCCCAGGAGCCTGCTCCTGGGTGAGAGTGGCGAACGGGTGAGTAATGCGTGACCGACCTGCCCCATACACCGGAATAGCTCCTGGAAACGGGTGGTAATGCCGGATGCTCCAGTTGGATGCATGTCCTTCTGGGAAAGATTCATCGGTATGGGATGGGGTCGCGTCCTATCAGCTTGATGGCGGGGTAACGGCCCACCATGGCTTCGACGGGTAGCCGGCCTGAGAGGGCGACCGGCCACATTGGGACTGAGATACGGCCCAG	0	0	0	0	0.103555	0	Actinobacteria	Actinobacteria	Bifidobacteriales	Bifidobacteriaceae	Bifidobacterium	Bifidobacterium_adolescentis_ATCC15703
261	GACGAACGCTGGCGGCGTGCCTAATACATGCAAGTCGAACGCTTCTTTCCTCCCGAGTGCTTGCACTCAATTGGAAAGAGGAGTGGCGGACGGGTGAGTAACACGTGGGTAACCTACCCATCAGAGGGGGATAACACTTGGAAACAGGTGCTAATACCGCATAACAGTTTATGCCGCATGGCATAAGAGTGAAAGGCGCTTTCGGGTGTCGCTGATGGATGGACCCGCGGTGCATTAGCTAGTTGGTGAGGTAACGGCTCACCAAGGCCACGATGCATAGCCGACCTGAGAGGGTGATCGGCCACACTGGGACTGAGACACGGCCCAG	0	0	0	0	0.103555	0	Firmicutes	Bacilli	Lactobacillales	Enterococcaceae	Enterococcus	Enterococcus_faecalis
262	GATGAACGCTGGCGGCGTGCCTAATACATGCAAGTCGAACGCTTCACTTCGGTGAAGAGTGGCGAACGGGTGAGTAATACATAAGTAACCTGGCATCTACAGGGGGATAACTGATGGAAACGTCAGCTAAGACCGCATAGGTGTAGAGATCGCATGAACTCTATATGAAAAGTGCTACGGGACTGGTAGATGATGGACTTATGGCGCATTAGCTGGTTGGTAGGGTAACGGCCTACCAAGGCGACGATGCGTAGCCGACCTGAGAGGGTGACCGGCCACACTGGGACTGAGACACGGCCCAG	0	0	0	0	0.103555	0	Firmicutes	Erysipelotrichia	Erysipelotrichales	Erysipelotrichaceae	Faecalibacillus	Faecalibacillus
263	GATGAACGCTGGCTGCGTGCTTAACACATGCAAGTCGAACGATGACGACCGGGCTTGCCTGGTCTGATTAGTGGCGAACGGGTGAGTAACACGTGAGTAACCTGCCCCTCACTTCGGGATAACCTCGGGAAATCGTGGCTAATACCGGATATGAACTTCTACCGCATGGTGGTTGTTGGAAAGTTTTTCGGTGAGGGATGGACTCGCGGCCTATCAGTTTGTTGGTGAGGTAATGGCTCACCAAGACGATGACGGGTAGCCGGCCTGAGAGGGCGACCGGCCACACTGGGACTGAGACACGGCCCAG	0	0.102215	0	0	0	0	Actinobacteria	Actinobacteria	Micrococcales	Dermabacteraceae	Brachybacterium	Brachybacterium
264	GATGAACGCTGGCGGCGTGCTTAACACATGCAAGTCGAACGAGAAGTGGAGACGGAAACCTTCGGGCGGAAGACTTTATTTCGAGTGGCGGACGGGTGAGTAACGCGTGGGTAACCTGCCTCATACAGGGGGATAACAGTTGGAAACGACTGTTAATACCGCATAAGACCACAGCACCGCATGGTGCGGGGGTAAAAACTCCGGTGGTATGAGATGGACCCGCGTTCGATTAGCCAGTTGGCGGGGTAACGGCCCACCAAAGCGACGATCGATAGCCGATCTGAGAGGATGACCGGCCACATTGGGACTGAGACACGGCCCAA	0	0.102215	0	0	0	0	Firmicutes	Clostridia	Clostridiales	Lachnospiraceae	Stomatobaculum	Stomatobaculum
265	GATGAACGCTGACAGAATGCTTAACACATGCAAGTCTTTGGCAAAGCTGTGCTTGCACAGTCTAGCCAAGGCGGACGGGTGAGTAACGCGTAAGGAACTTGCCCTGCAGTCAGGGATAACAGACGGAAACGACTGATAAAACCTGATAAAGTCAGACGGACTCATGTCCAGTCTGATGAAAAGAAATGCTGCAGGAGAGCCTTGCGTCCTATTAGCTTGTTGGTGGGGTAATGGCCCACCAAGGCGATGATAGGTAGCCGGCCTGAGAGGGTGGACGGCCACAAGGGGACTGAGATACGGCCCTT	0	0.102215	0	0	0	0	Fusobacteria	Fusobacteriia	Fusobacteriales	Leptotrichiaceae	Leptotrichia	Leptotrichia
266	GATGAACGCTAGCGGGAGGCCTAACACATGCAAGCCGAGCGGTAGAAGTCCTTCGGGACTTTGAGAGCGGCGTACGGGTGCGTAACACGTGTGCAACCTGCCTTTATCTTGGGGATAGCCTTTCGAAAGGAAGATTAATACCCACTAATATATTGATTGGCATCAATTGATATTGAAAACTCCGGTGGATAAAGATGGGCACGCGCAAGATTAGATAGTTGGTGAGGTAACGGCTCACCAAGTCAATGATCTTTAGGGGGCCTGAGAGGGTGATCCCCCACACTGGTACTGAGACACGGACCAG	0	0.102215	0	0	0	0	Bacteroidetes	Flavobacteriia	Flavobacteriales	Weeksellaceae	Chryseobacterium	Chryseobacterium
267	GACGAACGCTGGCGGCGTGCTTAACACATGCAAGTCGAACGCTGAAGCTCAGCTTTTGTTGGGTGGATGAGTGGCGAACGGGTGAGTAACACGTGAGTAACCTGCCCCCTTCTTTGGGATAACGCCCGGAAACGGGTGCTAATACTGGATATTCACTTGCCTTCGCATGGGGGTTGGTGGAAAGGTTTTTTCTGGTGGGGGATGGGCTCGCGGCCTATCAGCTTGTTGGTGGGGTGATGGCCTACCAAGGCTTTGACGGGTAGCCGGCCTGAGAGGGTGACCGGTCACATTGGGACTGAGATACGGCCCAG	0	0	0.0967118	0	0	0	Actinobacteria	Actinobacteria	Actinomycetales	Actinomycetaceae	Schaalia	Schaalia
268	GACGAACGCTGGCGGCGTGCCTAACACATGCAAGTCGAGCGAGCAGATTTCCTTCGGGAATGAAGCTAGCGGCGGACGGGTGAGTAACACGTGGGCAACCTGCCTCATAGAGGGGAATAGCCTCCCGAAAGGGAGATTAATACCGCATAAGATTGTAGCTTCGCATGAAGTAGCAATTAAAGGAGCAATCCGCTATGAGATGGGCCCGCGGCGCATTAGCTAGTTGGTGAGGTAACGGCTCACCAAGGCGACGATGCGTAGCCGACCTGAGAGGGTGATCGGCCACATTGGGACTGAGACACGGCCCAG	0	0	0.0967118	0	0	0	Firmicutes	Clostridia	Clostridiales	Clostridiaceae1	Clostridium_sensu_stricto	Clostridium_sensu_stricto_C._celatum
269	GACGAACGCTGGCGGCGTGCTTAACACATGCAAGTCGAACGGTGAAGCTCCAGCTTGCTGGAGTGGATCAGTGGCGAACGGGTGAGTAACACGTGAGCAACCTGCCCCAGACTCTGGAATAAGCGCTGGAAACGGCGTCTAATACTGGATACGAAGAGAATCTGCATGGGTATCTCTTGGAAAGTTTTTCGGTTTGGGATGGGCTCGCGGCCTATCAGCTTGTTGGTGAGGTAATGGCTCACCAAGGCGACGACGGGTAGCCGGCCTGAGAGGGCGACCGGCCACACTGGGACTGAGACACGGCCCAG	0	0	0.0967118	0	0	0	Actinobacteria	Actinobacteria	Micrococcales	Intrasporangiaceae	Janibacter	Janibacter
270	GATGAACGCTGGCGGCGTGCTTAACACATGCAAGTCGAACGAAGCACTTTAGTTGATTTCTTCGGATTGATTCTAAAGTGACTTAGTGGCGGACGGGTGAGTAACGCGTGGGTAACCTGCCTCGTACAGGGGGATAACAGTTAGAAATGACTGCTAATACCGCATAACCCGCTAAGGTCGCATGACCTGGACGGAAAAGATTTATCGGTACGAGATGGACCCGCGTCTGATTAGCTAGTTGGTGAGGTAACGGCCCACCAAGGCGACGATCAGTAGCCGGCCTGAGAGGGTGACTGGCCACATTGGGACTGAGACACGGCCCAA	0	0	0.0967118	0	0	0	Firmicutes	Clostridia	Clostridiales	Lachnospiraceae	unclassified_Lachnospiraceae	Lachnospiraceae
271	ATTGAACGCTGGCGGCAGGCTTAACACATGCAAGTCGAGCGGAAACGATGGGAGCTTGCTCCCAGGCGTCGAGCGGCGGACGGGTGAGTAATACTTAGGAATCTGCCCAGTAGTGGGGGATAGCTCGGGGAAACTCGAATTAATACCGCATACACCCTACGGGGAAAAGGGGGCGCTTGCGCTCTCGCTATTGGATGAGCCTAAGTCGGATTAGCTAGTTGGTGGGGTAAAGGCCTACCAAGGCGACGATCTGTAGCTGGTCTGAGAGGATGATCAGCCACACCGGGACTGAGACACGGCCCGG	0	0	0.0967118	0	0	0	Proteobacteria	Gammaproteobacteria	Pseudomonadales	Moraxellaceae	Psychrobacter	Psychrobacter
272	GATGAACGCTAGCGATAGGCTTAACACATGCAAGTCGAGGGGCAGCATGGTCTTAGCTTGCTAAGACTGATGGCGACCGGCGCACGGGTGCGTAACGCGTATGCAACTTGCCTCACAGAGGGGGATAACCCGTCGAAAGACGGACTAATACCGCGTACACTCCATCTTGGGCATCCAAGGAGGAGGAAATGAATTTCGCTGTGAGATAGGCATGCGTCCCATTAGCTTGTTGGTGAGGTAACGGCTCACCAAGGCGACGATGGGTAGGGGAACTGAGAGGTTGAACCCCCACACTGGTACTGAGACACGGACCAG	0	0	0.0967118	0	0	0	Bacteroidetes	Bacteroidia	Bacteroidales	Porphyromonadaceae	Porphyromonas	Porphyromonas
273	GACGAACGCTGGCGGCATGCCTAATACATGCAAGTCGAACGAGCTGACAGAGTGCTTGCACTCTCGACGCGAGTGGCGGACGGGTGAGTAACACGTGGGAAACCTACCTGTAAGTAGGGGATAACATTCGGAAACGGATGCTAATACCCTATAGGTTTCAGTTCCGCATGGAACTGAAAGGAAAGACGGCTTTGCTGTCGCTTACAGATGGTCCCGCGGCGCATTAGCTAGTTGGTGGGATAAAAGCTCACCAAGGCTGTGATGCGTAGCCGACCTGAGAGGGTAACCGGCCACACTGGGACTGAGACACGGCCCAG	0	0	0.0967118	0	0	0	Firmicutes	Bacilli	Lactobacillales	unclassified_Lactobacillales	unclassified_Lactobacillales	Lactobacillales
274	GATGAACGCTAGCGGGAGGCTTAACACATGCAAGCCGAGGGAGAAGTTGTCTTCGGACAGCGGACACCGGCGGACGGGTGAGTAACATGTATGCAACTTGCCCCTATCAGTGAGATAACCCGGGGAAACTCGGACTAATATCACATAACAAACGAAATAGCATTATTTTGTTTTAAAAGATTTATCGGATAGGGATAGGCATGCGTAGGATTAGTTAGTTGGTGAGGTAACGGCTCACCAAGACGATGATCCTTAGGGGGCCTGAGAGGGTGATCCCCCACACTGGTACTGAGACACGGACCAG	0	0	0.0967118	0	0	0	Bacteroidetes	Flavobacteriia	Flavobacteriales	Weeksellaceae	unclassified_Weeksellaceae	Weeksellaceae
275	GATAAACGCTGACAGAATGCTTAACACATGCAAGTCTATGAGGAAGTTTAGCTTGCTAAATGGACTCATGGCGGACGGGTGAGTAACGCGTAAAGAACTTGCCCTTTAGACTGGGATAACAGAGGGAAACTTCTGATAATACTGGATAAGTTAGTATATCGCATGATATGCAAATGAAAGCTACGGCACTAAAGGAGAGCTTTGCGTCCTATTAGCTAGTTGGTAAGGTAAGAGCTTACCAAGGCGATGATAGGTAGCCGGCCTGAGAGGGTGGACGGCCACAAGGGGACTGAGATACGGCCCTT	0	0	0	0	0	0.0895095	Fusobacteria	Fusobacteriia	Fusobacteriales	Leptotrichiaceae	Sneathia	Sneathia_amnionii
276	GATGAACGCTGGCGGCGTGCCTAACACATGCAAGTCGAGCGATCTTCTTCGGAAGAGAGCGGCGGACGGGTGAGTAACGCGTGGGTAACCTGCCCTGTACACACGGATAACATACCGAAAGGTATGCTAATACGGGATAACATAAGAAATTCGCATGTTTTTCTTATCAAAGCTCCGGCGGTACAGGATGGACCCGCGTCTGATTAGCTAGTTGGTGAGGTAACGGCTCACCAAGGCGACGATCAGTAGCCGACCTGAGAGGGTGATCGGCCACATTGGAACTGAGACACGGTCCAA	0	0	0	0	0.0862962	0	Firmicutes	Clostridia	Clostridiales	Peptostreptococcaceae	Intestinibacter	Intestinibacter
277	ATTGAACGCTGGCGGCATGCTTTACACATGCAAGTCGAACGGCAGCGCGGGGAGCTTGCTCCCTGGCGGCGAGTGGCGCACGGGTGAGTAATACATCGGAACGTGTCTTCTAGTGGGGGATAACTGCCCGAAAGGGCAGCTAATACCGCATGAGACCTGAGGGTGAAAGCGGGGGATCGCAAGACCTCGCGCTGGAAGAGCGGCCGATGTCCGATTAGCTAGTTGGTGAGGTAAAGGCTCACCAAGGCGACGATCGGTAGCTGGTCTGAGAGGACGACCAGCCACACTGGGACTGAGACACGGCCCAG	0	0	0	0	0.0862962	0	Proteobacteria	Betaproteobacteria	Burkholderiales	Sutterellaceae	Sutterella	Sutterella_wadsworthensis
278	GACGAACGCTGGCGGCGTGCCTAACACATGCAAGTCGAGCGGAGACAGTGAGTAGCTTGCTATGAGCTGTTTTAGCGGCGGACGGGTGAGTAACGCGTGAGCAACCTTTCCCAGACAGGGGAATAACACACCGAAAGGTGTACTAATACCGCATAAGACCACGGGATCACATGGTTCTGGGGTAAAAGATTTATCGGTTTGGGGTGGGCTCGCGTCCGATTAGGTAGTTGGTGAGGTAACGGCCCACCAAGCCGACGATCGGTAGCCGACCTGAGAGGGTGATCGGCCACATTGGGACTGAGACACGGCCCAA	0	0	0	0	0.0862962	0	Firmicutes	Clostridia	Clostridiales	unclassified_Clostridiales	unclassified_Clostridiales	Clostridiales
279	GACGAACGCTGGCGGCGTGCTTAACACATGCAAGTCGAACGCTGAAGGCTCAGCTTGCTGGGCTGGATGAGTGGCGAACGGGTGAGTAACACGTGAGTAACCTGCCCTCTTCTTTGGGATAACGGTCGGAAACGGCTGCTAATACCGGGTATTCACTGTCCTTCGCATGGGGGGTGGTGGAAAGGTTTTTTCTGGTGGGGGATGGGCTCGCGGCCTATCAGCTTGTTGGTGGGGTGATGGCTTACCAAGGCTTTGACGGGTAACCGGCCTGAGAGGGTGACCGGTCACATTGGGACTGAGATACGGCCCAG	0	0	0.0828958	0	0	0	Actinobacteria	Actinobacteria	Actinomycetales	Actinomycetaceae	Schaalia	Schaalia_lingnae
280	GATGAACGCTAGCTACAGGCTTAACACATGCAAGTCGAGGGGCAGCATCATCAAAGCTTGCTTTGATGGATGGCGACCGGCGCACGGGTGAGTAACACGTATCCAACCTGCCGACAACACTGGGATAGCCTTTCGAAAGAAAGATTAATACCGGATGGCATAGTCTTCCCGCATGGGATTATTATTAAAGAATTTCGGTTGTCGATGGGGATGCGTTCCATTAGGCAGTTGGCGGGGTAACGGCCCACCAAACCTACGATGGATAGGGGTTCTGAGAGGAAGGTCCCCCACATTGGAACTGAGACACGGTCCAA	0	0	0.0828958	0	0	0	Bacteroidetes	Bacteroidia	Bacteroidales	Bacteroidaceae	Bacteroides	Bacteroides_stercoris
281	GACGAACGCTGGCGGCGTGCTTAACACATGCAAGTCGAACGGTGAAGCAGGAGCTTGCTCCTGTGGATCAGTGGCGAACGGGTGAGTAACACGTGAGTAACCTGCCCCAGACTCTGGGATAACCATGGGAAATCGTGGCTAATACCGGATACGAGACGCACACGCATGTGCAGCGTCTGGAAAGAATTTCGGTCTGGGATGGACTCGCGGCCTATCAGCTTGTTGGTGAGGTAACGGCTCACCAAGGCGACGACGGGTAGCCGGCCTGAGAGGGCGACCGGCCACACTGGGACTGAGACACGGCCCAG	0	0	0.0828958	0	0	0	Actinobacteria	Actinobacteria	Micrococcales	Cellulomonadaceae	unclassified_Cellulomonadaceae	Cellulomonadaceae
282	GACGAACGCTGGCGGCGTGCCTAACACATGCAAGTCGAACGAGGTCCATGCAGTGGCAACACTGCGGAAGACCTAGTGGCGAACGGGTGAGTAACACGTGAGGAACCTGCCCCGAAGACCGGGATAACCCTCCGAAAGGAGAGCTAATACCGGATACCCCCACCGGATCGCATGATCTGGTGAGGAAATGGATTCCGCTTCGGGAGGGCCTCGCGGCCTATCAGCTAGTTGGTGGGGTAACGGCCCACCAAGGCATCGACGGGTAGCTGGTCTGAGAGGACGATCAGCCACACTGGGACTGAGACACGGCCCAG	0	0	0.0828958	0	0	0	Actinobacteria	Acidimicrobiia	Acidimicrobiales	Iamiaceae	Aquihabitans	Aquihabitans
283	ATTGAACGCTGGCGGCAGGCTTAACACATGCAAGTCGAGCGGTAACAGGAGAAGCTTGCTTCTCGCTGACGAGCGGCGGACGGGTGAGTAATACTTAGGAATCTACCTAGTAGTGGGGGATAGCTCGGGGAAACTCGAATTAATACCGCATACGACCTACGGGAGAAAGGGGGCAACTTGTTGCTCTCGCTATTAGATGAGCCTAAGTCGGATTAGCTAGATGGTGGGGTAAAGGCCTACCATGGCGACGATCTGTAGCTGGTCTGAGAGGATGATCAGCCACACCGGGACTGAGACACGGCCCGG	0	0	0.0828958	0	0	0	Proteobacteria	Gammaproteobacteria	Pseudomonadales	Moraxellaceae	Psychrobacter	Psychrobacter_faecalis_pulmonis
284	GACGAACGCTGGCGGCGTGCTTAACACATGCAAGTCGAGCGGTAAGGCCCCTTCGGGGGTACACGAGCGGCGAACGGGTGAGTAACACGTGAGTAACCTGCCCCATTCATCGGAATAACCAGTGGAAACGCTGGCTAATGCCGAATACGACCATCGAAGGCATCTTCTGGTGGTGGAAAGCTCCGGCGGAGTGGGATGGACTCGCGGCCTATCAGCTTGTTGGTGAGGTAACGGCTCACCAAGGCGACGACGGGTAGCCGGCCTGAGAGGGTGACCGGCCACACTGGGACTGAGACACGGCCCAG	0	0	0.0828958	0	0	0	Actinobacteria	Actinobacteria	Propionibacteriales	Nocardioidaceae	Aeromicrobium	Aeromicrobium
285	GACGAACGCTGGCGGCGTGCTTAACACATGCAAGTCGAGCGGAAAGGCCACTTCGGTGGTACTCGAGCGGCGAACGGGTGAGTAACACGTGAGTAATCTGCCCTCCACTTCGGGATAGCCGCCGGAAACGGTGATTAATACCGGATATGACACGTCTTCGCATGTTGGTGTGTGGAAAGTTTTTCGGTGGGGGATGTGCTCGCGGCCTATCAGCTTGATGGTGAGGTAATGGCTCACCATGGCTTCGACGGGTAGCCGGCCTGAGAGGGTGACCGGTCACACTGGGACTGAGACACGGCCCAG	0	0	0.0828958	0	0	0	Actinobacteria	Actinobacteria	Propionibacteriales	Nocardioidaceae	Nocardioides	Nocardioides
286	GATGAACGCTAGCGGCAGGCCTAACACATGCAAGTCGAGGGGCAGCGGGAATGAAGCTTGCTTCATTTGCCGGCGACCGGCGCACGGGTGCGTAACGCGTATGTAACCTACCTTAAACAGGGGCATAACACTGAGAAATTGGTACTAATTCCCCATAACACTTCGGGAGGCATCTTCTGAAGTTGAAAGTTCCGGCGGTTTAAGATGGACATGCGTTGTATTAGTTAGTTGGTGAGGTAACGGCTCACCAAGACGACGATACATAGGGGGACTGAGAGGTTAACCCCCCACATTGGTACTGAGACACGGACCAA	0	0	0.0828958	0	0	0	Bacteroidetes	Bacteroidia	Bacteroidales	Rikenellaceae	Alistipes	Alistipes
287	ATTGAACGCTGGCGGCAGGCCTAACACATGCAAGTCGAGCGGTAACAGGGGAGCTTGCTCCCGCTGACGAGCGGCGGACGGGTGAGTAACGCGCAGGAATCTACCTGGTAGTGGGGGATAGCTCGGGGAAACTCGAATTAATACCGCATACGTCCTAGGGGAGAAAGTGGGGGATCTTCGGACCTCACGCTATCAGAAGAGCCTGCGTAGGATTAGCTTGTTGGTGGGGTAAAGGCCTACCAAGGCGACGATCCTTAACTGGTCTGAGAGGATGATCAGTCACACCGGAACTGAGACACGGTCCGG	0	0	0.0828958	0	0	0	Proteobacteria	Gammaproteobacteria	unclassified_Gammaproteobacteria	unclassified_Gammaproteobacteria	unclassified_Gammaproteobacteria	Gammaproteobacteria
288	GACGAACGCTGGCGGCGTGCCTAATACATGCAAGTCGAACGAACTGACGCTGGAACTTGTTCCAGTTGACGTGAGTGGCGAACGGGTGAGTAACACGTGGGGAACCTACCCTTCAGCGGGGGATAACCGTCGGAAACGATGGCTAATACCGCATAAAACTTTGTACCACATGGTACGGAGTTAAAAGACGGCTTCGGCTGTCACTGAAGGATGGTCCCGCGGTGCATTAGCTAGTTGGTAGGGTAAAGGCCTACCAAGGCGATGATGCATAGCCGACCTGAGAGGGTGATCGGCCACACTGGGACTGAGACACGGCCCAG	0	0	0.0690799	0	0	0	Firmicutes	Bacilli	Lactobacillales	Aerococcaceae	Facklamia	Facklamia
289	ATTGAACGCTAGCGGGATGCCTTACACATGCAAGTCGAACGGCAGCGGAAAGAAAGCTTGCTTTCTTTGCCGGCGAGTGGCGAACGGGTGAGTAATGTATCGGAACGTGCCCAGTAGCGGGGGATAACTGGCCGAAAGGTCAGCTAATACCGCATACGCCCTACGGGGGAAAGGGGGGGATTCTTCGGAACCTCTCACTATTGGAGCGGCCGATATCGGATTAGCTAGTTGGTGGGGTAATGGCCTACCAAGGCCGCGATCCGTAGCTGGTTTGAGAGGACGACCAGCCACACTGGGACTGAGACACGGCCCAG	0	0	0.0690799	0	0	0	Proteobacteria	Betaproteobacteria	Burkholderiales	Alcaligenaceae	Advenella	Advenella
290	ATTGAACGCTGGCGGCAGGCTTAACACATGCAAGTCGAGCGGTAACAGGGGGTGCTTGCACCCCGCTGACGAGCGGCGGACGAGTGAGTAATGCTTAGGAATCTGCCCAGTAGTGGGGGACAACAGTCGGAAACGGCTGCTAATACCGCATACGCCCTACGGGGGAAAGCAGGGGATCTTCGGACCTTGCGCTATTGGATGAGCCTAAGTCGGATTAGCTAGTTGGTAGGGTAAAGGCCTACCAAGGCGACGATCCGTAGCTGGTCTGAGAGGATGATCAGCCACATCGGGACTGAGACACGGCCCGA	0	0	0.0690799	0	0	0	Proteobacteria	Gammaproteobacteria	Alteromonadales	Alteromonadaceae	Marinobacter	Marinobacter_vinifirmus/bacchus
291	GATGAACGCTAGCTACAGGCTTAACACATGCAAGTCGAGGGGCAGCACAGTGTAGCAATACATGGGTGGCGACCGGCGCACGGGTGCGTAACGCGTATCCAACCTTCCCGTTACTCTTGGATAGCCTTCCGAAAGGGAGATTAATACAAGATGGTATTCAAATTCCGCATGTTATTTGAATTAAAGATTTATCGGTAACGGATGGGGATGCGTGACATTAGATAGTAGGCGGGGTAACGGCCCACCTAGTCTACGATGTCTAGGGGTTCTGAGAGGAAGGTCCCCCACACTGGAACTGAGACACGGTCCAG	0	0	0.0690799	0	0	0	Bacteroidetes	Bacteroidia	Bacteroidales	Bacteroidaceae	Phocaeicola	Phocaeicola
292	GATGAACGCTAGCTACAGGCTTAACACATGCAAGTCGAGGGGCAGCATTAGGTAGCAATACTGAGATGGCGACCGGCGCACGGGTGCGTAACGCGTATCCAACTTTCCCGTTACTCTGGGATAGCCTTCCGAAAGGGAGATTAATACCGGATGGTGTTGAAATTTCGCATGTTATTTCAACTAAAGATTTATCGGTAACGGATAGGGATGCGTGACATTAGGTAGATGGCGGGGTAACGGCCCACCATGCCCACGATGTCTAGGGGTTCTGAGAGGAAGGTCCCCCACACTGGAACTGAGACACGGTCCAG	0	0	0.0690799	0	0	0	Bacteroidetes	Bacteroidia	Bacteroidales	Bacteroidaceae	Phocaeicola	Phocaeicola
293	GATGAACGCTAGCGGCAGGCCTAACACATGCAAGTCGAGGGGTAGAAGTTGCTTGCAACTTTGAGACCGGCGCACGGGTGCGTAACGCGTATGCAATCTGCCTTGTACTGAGGGATAGCCCGGAGAAATCCGGATTAATACCTCATGTGATATATAGATAGCCTTATTTATATATTAAAGATTTATCGGTACAAGATGAGCATGCGTCCCATTAGCTAGTTGGTATGGTAACGGCATACCAAGGCAATGATGGGTAGGGGTCCTGAGAGGGAGATCCCCCACACTGGTACTGAGACACGGACCAG	0	0	0.0690799	0	0	0	Bacteroidetes	Flavobacteriia	Flavobacteriales	Flavobacteriaceae	Myroides	Myroides
294	GATGAACGCTGGCGGCGTGCTTAACACATGCAAGTCGAACGAAGCACTTTGAAACAATCCTCCGGGTGCGTTTCTTTGTGACTTAGTGGCGGACGGGTGAGTAACGCGTGGGTAACCTGCCTCATGCAGGGGGATAACAGTTAGAAATGACTGCTAATACCGCATAAGCGCACAGTACCGCATGGTACAGTGTGAAAAGATTTATCAGCATGAGATGGACCCGCGTCTGATTAGCTAGTTGGTGAGGTAACGGCTCACCAAGGCGACGATCAGTAGCCGACTTGAGAGAGTGATCGGCCACATTGGGACTGAGACACGGCCCAA	0	0	0.0690799	0	0	0	Firmicutes	Clostridia	Clostridiales	Lachnospiraceae	unclassified_Lachnospiraceae	Lachnospiraceae
295	ATTGAACGCTGGCGGCAGGCTTAACACATGCAAGTCGAGCGGTAACAGGAGAAGCTTGCTTCTCGCTGACGAGCGGCGGACGGGTGAGTAATACTTAGGAATCTGCCCAGTAGTGGGGGATAGCTCGGGGAAACTCGAATTAATACCGCATACACCCTACGGGGAAAAGGGGGCGCTTGCGCTCTCGCTATTGGATGAGCCTAAGTCGGATTAGCTAGTTGGTGGGGTAAAGGCCTACCAAGGCGACGATCTGTAGCTGGTCTGAGAGGATGATCAGCCACACCGGGACTGAGACACGGCCCGG	0	0	0.0690799	0	0	0	Proteobacteria	Gammaproteobacteria	Pseudomonadales	Moraxellaceae	Psychrobacter	Psychrobacter_sanguinis
296	GATGAACGCTAGCTACAGGCTTAACACATGCAAGTCGAGGGGCAGCACGGAGATAGCTTGCTATCTTGGGTGGCGACCGGCGCACGGGTGAGTAACGCGTATCCAACCTGCCCATTACTCAGGGATAGCCTTGCGAAAGTAAGATTAATACCTGATGTTGTTTGATTGCCGCATGACGGTCAAACCAAAGATTTATTGGTAATGGATGGGGATGCGTGACATTAGGTAGTTGGTGAGGTAACGGCTCACCAAGCCTACGATGTCTAGGGGTTCTGAGAGGAAGGTCCCCCACACTGGAACTGAGACACGGTCCAG	0	0	0.0690799	0	0	0	Bacteroidetes	Bacteroidia	Bacteroidales	Prevotellaceae	Alloprevotella	Alloprevotella
297	GACGAACGCTGGCGGCGTGCTTAACACATGCAAGTCGAACGGTGAAGCCCAGCTTGCTGGGTGGATCAGTGGCGAACGGGTGAGTAACACGTGAGCAACCTGCCCTCCACTTCGGGATAAGCCTTGGAAACGGGGTCTAATACCGGATATGAGCATCTGCCGCATGGTGGGTGTTGGAAAGTTTTTCGGTGGGGGATGGGCTCGCGGCCTATCAGCTTGTTGGTGGGGTGATGGCCTACCAAGGCGTCGACGGGTAGCCGGCCTGAGAGGGCGACCGGCCACACTGGGACTGAGACACGGCCCAG	0	0	0.0690799	0	0	0	Actinobacteria	Actinobacteria	Micrococcales	Promicromonosporaceae	Isoptericola	Isoptericola_variabilis
298	ATTGAACGCTGGCGGCAGGCTTAACACATGCAAGTCGAGCGGTAACAGAGAGTAGTTTACTATTCTGCTGACGAGCGGCGGACGGGTGAGTAATGCCTAGGAATCTGCCTAGTAGTGGGGGATAACTTGCCGAAAGGTAAGCTAATACCGCATACGTCCTACGGGAGAAAGCAGGGGACTCTTCGGAGCCTTGCGCTATTAGATGAGCCTAGGTCGGATTAGTTAGTTGGTGAGGTAATGGCTCACCAAGACCGCGATCCGTAACTGGTCTGAGAGGATGATCAGTCACACTGGAACTGAGACACGGTCCAG	0	0	0.0690799	0	0	0	Proteobacteria	Gammaproteobacteria	Pseudomonadales	Pseudomonadaceae	Pseudomonas	Pseudomonas
299	AACGAACGCTGGCGGCAGGCTTAACACATGCAAGTCGAACGGTTCCTTCGGGAACAGTGGCAGACGGGTGAGTAACACGTGGGAATCTACCCATCCCTACGGAACAACTCCGGGAAACTGGAGCTAATACCGTATACGCCCTTTTGGGGAAAGATTTATCGGGGATGGATGAGCCCGCGTTGGATTAGCTAGTTGGTGGGGTAAAGGCCTACCAAGGCGACGATCCATAGCTGGTCTGAGAGGATGATCAGCCACATTGGGACTGAGACACGGCCCAA	0	0	0.0690799	0	0	0	Proteobacteria	Alphaproteobacteria	Rhizobiales	Rhizobiaceae	unclassified_Rhizobiaceae	Rhizobiaceae
300	AACGAACGCTGGCGGCAGGCTTAACACATGCAAGTCGAGCGCCCCGCAAGGGGAGCGGCAGACGGGTGAGTAACGCGTGGGAACGTACCCTTTTCTACGGAATAACCCAGGGAAACTTGGACTAATACCGTATGAGCCCTACGGGGGAAAGATTTATCGGGAAAGGAACGGCCCGCGTTGGATTAGCTAGTTGGTGGGGTAACGGCCTACCAAGGCGACGATCCATAGCTGGTCTGAGAGGATGATCAGCCACATTGGGACTGAGACACGGCCCAA	0	0	0.0690799	0	0	0	Proteobacteria	Alphaproteobacteria	Rhizobiales	Rhizobiaceae	Rhizobium	Rhizobium
301	GATGAACGCTAGCGGCAGGCTTAACACATGCAAGTCGAGGGGCAGCGTGATGAAGTAGCAATACGGATTCGACGGCGACCGGCGCACGGGTGCGTAACGCGTATGTAACCTACCTTTAACAGGGGGATAACACTGAGAAATTGGTACTAATACCCCATAATACTATAGGAGGCATCTCCTTTAGTTGAAAGTTCCGGCGGTTAAAGATGGACATGCGTTGTATTAGCTAGATGGTGAGGTAACGGCTCACCATGGCGACGATACATAGGGGGACTGAGAGGTTAACCCCCCACACTGGTACTGAGACACGGACCAG	0	0	0.0690799	0	0	0	Bacteroidetes	Bacteroidia	Bacteroidales	Rikenellaceae	Alistipes	Alistipes
302	GATGAACGCTGGCGGCGTGCATAACACATTCAAGTCGAACGAGGTAGCAATACCTAGTGGCGGACGGGTGAGTAACGCGTGAGCAACCTGCCCTTGTGTGGGGGATACCGTCTGGAAACGGACGTTAATACCGCATAACATAGCGGAATCGCATGGTTCTGCTATCAAAGATTTATTGCGCAAGGATGGGCTCGCGTTGGATTAGATAGTTGGTGAGGTAACGGCCCACCAAGTCTGCGATCCATAGCCGGACTGAGAGGTTGAACGGCCACATTGGAACTGAGATACGGTCCAG	0	0	0.0690799	0	0	0	Firmicutes	Clostridia	Clostridiales	Ruminococcaceae	unclassified_Ruminococcaceae	Ruminococcaceae
303	GATCAACGCTGGCGGCGTGCCTAATGCATGCAAGTCGAACGGGGTCATCTTCGGATGGCTTACGTGGCGGACGGGTGAGGAACGCGTGGCCAACCTGCCCTTTGGTGGGGGATAACCGCTGGAAACAGTGGGTAATACCGCATGAGACATTTTGACGAGTGGGTTGAAATGGGAAAGCCTATAAGGCGCCGAAGGAGGGGGCTGCGTCCGATTAGCTAGACGGTGGGGTAACGGCCTACCGTGGCAGTGATCGGTAGCTGGTTTGAGAGGATGATCAGCCACACGGGGACTGAGACACGGCCCCG	0	0	0.0690799	0	0	0	Chloroflexi	Thermomicrobia	Sphaerobacterales	Sphaerobacteraceae	unclassified_Sphaerobacteraceae	Sphaerobacteraceae
304	GACGAACGCTGGCGGCGTGCCTAATACATGCAAGTAGGACGCACAGTTTATACCGTAGCTTGCTACACCATAGACTGTGAGTTGCGAACGGGTGAGTAACGCGTAGGTAACCTGCCTATTAGAGGGGGATAACTATTGGAAACGATAGCTAATACCGCATAACAGTATGTAACACATGTTAGATGCTTGAAAGATGCAATTGCATCGCTAGTAGATGGACCTGCGTTGTATTAGCTAGTAGGTAGGGTAATGGCCTACCTAGGCAACGATACATAGCCGACCTGAGAGGGTGATCGGCCACACTGGGACTGAGACACGGCCCAG	0	0	0.0690799	0	0	0	Firmicutes	Bacilli	Lactobacillales	Streptococcaceae	Streptococcus	Streptococcus_anginosus
305	AACGAACGCTGGCGGCACGCTTTAAGCATGCAAGTCGAGGGGCAGCAATGTAGCAATACAGTTGGCGACCGGCGCACGGGTGAGTAACACGTAAGGATCTGCCTAAAGGTCTAGGATAGCCAATGGAAACATTGGGTAATACTGGATGGAACCGAGAGGTTAAAGCTAAGCAATTAGTGCCTTTGGATGAACTTGCGGTTCATTAGCTAGTTGGTGAGGTAAGAGCTTACCAAGGCGACGATGGATAGCCGGCCTGAGAGGGTGAACGGCCACAATGGAACTGAGACACGGTCCAT	0	0	0.0690799	0	0	0	Bacteria	unclassified_Bacteria	unclassified_Bacteria	unclassified_Bacteria	unclassified_Bacteria	Bacteria
306	GATGAACGCTAGCTACAGGCTTAACACATGCAAGTCGAGGGGTAGCACGGAGGAAGCTTGCTTCCTTGGGTGACGACCGGCGCACGGGTGAGTAACGCGTATCCGACCTACCCATAACACGGGCACAGCCGCTCGAAAGAGTGATTGATTCCCGATATGTCTTTAGAGTAGATCTAATGATGAAAGATTTATCGGTTATGGATGGGGATGCGTAAGATTAGGTAGTAGGCGGGGTAACGGCCCACCTAGCCGACGATCTTTAGGGGTTCTGAGAGGAAGGTCCCCCACACTGGTACTGAGACACGGACCAG	0	0	0.0690799	0	0	0	Bacteroidetes	Bacteroidia	Bacteroidales	unclassified_Bacteroidales	unclassified_Bacteroidales	Bacteroidales
307	GATGAACGCTAGCGACAGGCCTAACACATGCAAGTCGAGGGGCAGCATGAAAGTAGCTTGCTACTTTTGATGGCGACCGGCGCACGGGTGCGTAACAGGTGTGCAATCTGTCCATAATCGGGGAATAGCCCAGCGAAAGTTGGATTAATGCTCCATGTGAGCCGAGGAGGCATCTCTTTGGTTTGAAACGTAAGGATTATGGGTGAGCACGCTTCTGATTAGGTAGTTGGTGAGGTAACGGCTCACCAAGCCGACGATCAGTAGGGGTTCTGAGAGGAAGGTCCCCCACATTGGAACTGAGACACGGTCCAA	0	0	0.0690799	0	0	0	Bacteroidetes	Bacteroidia	Bacteroidales	unclassified_Bacteroidetes	unclassified_Bacteroidales	Bacteroidales
308	GATGAACGCTAGCGACAGGCCTAACACATGCAAGTCGAGGGGCAGCGCGGAGCAAGCTTGCTTGTTCTGGCGGCGACCGGCGCACGGGTGCGTAACAGGTGTGCAATCTGTCCATAATCGGGGAATAGCCCAGCGAAAGTTGGATTAATGCTCCATGTGAGCTTGAGAGGCATCTCTCGGGTTTGAAACGTAAGGATTATGGGTGAGCACGCTTCTGATTAGGTAGTTGGTGAGGTAACGGCTCACCAAGCCGACGATCAGTAGGGGTTCTGAGAGGAAGGTCCCCCACATTGGAACTGAGACACGGTCCAA	0	0	0.0690799	0	0	0	Bacteroidetes	Bacteroidia	Bacteroidales	unclassified_Bacteroidetes	unclassified_Bacteroidales	Bacteroidales
309	GATGAACGCTAGCTACAGGCTTAACACATGCAAGTCGAGGGGCAGCATGACCTAGCAATAGGTTGATGGCGACCGGCGCACGGGTGAGTAACACGTATCCAACCTACCGGTTATTCCGGGATAGCCTTTCGAAAGAAAGATTAATACCGGATAGTATAACGAGAAGGCATCTTTTTGTTATTAAAGAATTTCGATAACCGATGGGGATGCGTTCCATTAGTTTGTTGGCGGGGTAACGGCCCACCAAGACATCGATGGATAGGGGTTCTGAGAGGAAGGTCCCCCACATTGGAACTGAGACACGGTCCAA	0	0	0	0	0.0690369	0	Bacteroidetes	Bacteroidia	Bacteroidales	Bacteroidaceae	Bacteroides	Bacteroides_cellulosilyticus
310	GATGAACGCTAGCTACAGGCTTAACACATGCAAGTCGAGGGGCAGCATTTCAGTTTGCTTGCAAACTGGAGATGGCGACCGGCGCACGGGTGAGTAACACGTATCCAACCTGCCGATAACTCGGGGATAGCCTTTCGAAAGAAAGATTAATACCCGATGGTATAATCAGACCGCATGGTTTGATTATTAAAGAATTTCGGTTATCGATGGGGATGCGTTCCATTAGGCAGTTGGTGAGGTAACGGCTCACCAAACCTTCGATGGATAGGGGTTCTGAGAGGAAGGTCCCCCACATTGGAACTGAGACACGGTCCAA	0	0	0	0	0.0690369	0	Bacteroidetes	Bacteroidia	Bacteroidales	Bacteroidaceae	Bacteroides	Bacteroides_thetaiotaomicron/faecis
311	GATAAACGCTGGCGGCGTGCTTAACACATGCAAGTCGAACGAAGTTTTTCTTTCGGGAGGAACTTAGTGGCGGACGGGTGAGTAACGCGTGGGTAACCTGCCCTGTACAGGGGGACAACAGCTGGAAACGGCTGCTAATACCGCATAAGCCCTTAGCACTGCATGGTGCATAGGGAAAAGGAGCAATCCGGTACAGGATGGACCCGCGTCTGATTAGCCAGTTGGCAGGGTAACGGCCTACCAAAGCGACGATCAGTAGCCGATCTGAGAGGATGTACGGCCACATTGGGACTGAGACACGGCCCAG	0	0	0	0	0.0690369	0	Firmicutes	Clostridia	Clostridiales	Lachnospiraceae	unclassified_Lachnospiraceae	Lachnospiraceae
312	GACGAACGCTGGCGGCACGCTTAACACATGCAAGTCGAACGGAGAACATTGAGCTTGCTTAATGTTCTTAGTGGCGGACGGGTGAGTAACACGTGAGTAACCTGCCTCTGAGAGTGGGATAGCTTCTGGAAACGGATGGTAATACCGCATAACATCATGGATTCGCATGTTTCTATGATCAAAGATTTATCGCTTAGAGATGGACTCGCGTCTGATTAGCTAGTTGGTAAGGTAACGGCTTACCAAGGCGACGATCAGTAGCCGGACTGAGAGGTTGATCGGCCACATTGGGACTGAGACACGGCCCAG	0	0	0	0	0.0690369	0	Firmicutes	Clostridia	Clostridiales	Ruminococcaceae	Ruminococcus	Ruminococcus
313	GACGAACGCTGGCGGCGTGCCTAACACATGCAAGTCGAACGGAACTGTTTTGAAAGATTTCTTCGGAATGAATTTGATTTAGTTTAGTGGCGGACGGGTGAGTAACGCGTGAGTAACCTGCCTTCAAGAGGGGGATAACATTCTGAAAAGAATGCTAATACCGCATGACATATCGGAACCACATGATTTTGATATCAAAGATTTTATCGCTTGAAGATGGACTCGCGTCCGATTAGTTAGTTGGTGAGGTAACGGCTCACCAAGACCGCGATCGGTAGCCGGACTGAGAGGTTGAACGGCCACATTGGGACTGAGACACGGCCCAG	0	0	0	0	0.0690369	0	Firmicutes	Clostridia	Clostridiales	Ruminococcaceae	Ruminococcus	Ruminococcus
314	ATTGAACGCTAGCGGGATGCTTTACACATGCAAGTCGAACGGCAGCGCGAGGAAAGCTTGCTTTTCTTGGCGGCGAGTGGCGAACGGGTGAGTAATGTATCGGAACGTGCCCAGTAGCGGGGGATAACTACGCGAAAGCGTGGCTAATACCGCATACGCCCTACGGGGGAAAGGGGGGGATCGCAAGACCTCTCACTATTGGAGCGGCCGATATCGGATTAGCTAGTTGGTGAGGTAAAGGCTCACCAAGGCTGCGATCCGTAGCTGGTTTGAGAGGACGACCAGCCACACTGGGACTGAGACACGGCCCAG	0	0.0681431	0	0	0	0	Proteobacteria	Betaproteobacteria	Burkholderiales	Alcaligenaceae	Pusillimonas	Pusillimonas
315	AACGAACGCTGGCGGCGTGGATTAGGCATGCAAGTCGTACGAGAAAGCGTCCTTCGGGGCGTGAGTACAGTGGCGAACTGGTGAGTACAAGGTGACTAACCTGCCCTTGAGTGGGGGATAACTTCGGGAAACCGGAGCTAATACCGCATAGTTTCTTTGTCCTGCGGGATGGAGAGTAAAGCATTTATGCGCTCGAGGATGGGGTCACCCCCCATTAGCTTGTTGGTAGGGTAATGGCCTACCAAGGCTGCGATGGGTAGCTGGACTGAGAGGTTGACCAGCCACACTGGGACTGAGATACGGCCCAG	0	0.0681431	0	0	0	0	BRC1	BRC1	BRC1	BRC1	BRC1_genera_incertae_sedis	BRC1_genera_incertae_sedis
316	ATTGAACGCTGGCGGCGTGCCTAATACATGCAAGTCGAACGGAGATTAAGTAGCTTGCTATTTAATCTTAGTGGCGCACGGGTGAGTAATATATAGCTAACTTGCCCATTACTAAGGGACAACAGTTGGAAACGACTGCTAATACCTTATACTCCGTATCTATATAAGTGGGTACGGGAAAGTTTTTCGGTAATGGATAGGGCTATATCGTATCAGCTAGTTGGTAAGGTAACGGCTTACCAAGGCTATGACGCGTAACTGGTCTGAGAGGATGATCAGTCACACTGGAACTGAGACACGGCCCAG	0	0.0681431	0	0	0	0	Campylobacterota	Campylobacteria	Campylobacterales	Campylobacteraceae	Campylobacter	Campylobacter
317	GATGAACGCTGGCGGCGTGCCTAATACATGCAAGTCGAGCGAGAAGCTCGCCAATGAGACTTCGGTGGATTTGGCGGGTGGAAAGCGGCGGACGGGTGAGTAACGCGTAGGCAACCTGCCCTTTGCACAGGGATAGCCACTGGAAACGGTGATTAATACCTGATAATGCGAACCTATCGCCTGATAGGATCGCCAAAGATTTATTGGCAAAGGATGGGCCTGCGTCTGATTAGCTAGTTGGTGAGGTAATGGCTCACCAAGGCGACGATCAGTAGCCGACCTGAGAGGGTGATCGGCCACATTGGAACTGAGACACGGTCCAA	0	0.0681431	0	0	0	0	Firmicutes	Clostridia	Clostridiales	Clostridiales_Incertae_Sedis_XIII	unclassified_Clostridiales_Incertae_Sedis_XIII	Clostridiales_Incertae_sedis_XIII
318	GATGAACGCTGGCGGCGTGCTTAACACATGCAAGTCGAACGGAGTTTTATCAATTGATTGATTAAGCTTGCTTTTGAGAGATTTTGATAAAACTTAGTGGCGGACGGGTGAGTAACGCGTGGGTAACCTGCCGTATACAGGGGGACAACAGTTGGAAACGACTGCTAATACCGCATAAGCGCACGGTACCGCATGGTACAGTGTGAAAAACTCCGGTGGTATACGATGGACCCGCGTCTGATTAGCTAGTTGGTGAGGTAACGGCCCACCAAGGCGACGATCAGTAGCCGGCCTGAGAGGGTGGACGGCCACATTGGGACTGAGACACGGCCCAA	0	0.0681431	0	0	0	0	Firmicutes	Clostridia	Clostridiales	Lachnospiraceae	Clostridium_XIVa	Clostridium_XIVa
319	GACGAACGCTGGCGGCGTGCTTAACACATGCAAGTCGAGCGGTAAGGCTCCTTCGGGAGTACACGAGCGGCGAACGGGTGAGTAACACGTGAGTAACCTGCCCCTTTCATCGGAATAACCAGTGGAAACGCTGGCTAATGCCGAATACGACCACCGAAGGCATCTTCTGGTGGTGGAAAGCTCCGGCGGAGAGGGATGGACTCGCGGCCTATCAGCTTGTTGGTGAGGTAATGGCTCACCAAGGCAACGACGGGTAGCCGGCCTGAGAGGGTGACCGGCCACACTGGGACTGAGACACGGCCCAG	0	0.0681431	0	0	0	0	Actinobacteria	Actinobacteria	Propionibacteriales	Nocardioidaceae	Aeromicrobium	Aeromicrobium
320	GATGAACGCTAGCTACAGGCTTAACACATGCAAGTCGAGGGGAAACGACAGGGAGTGCTTGCACACTCTGGGCGTCGACCGGCGCACGGGTGAGTAACGCGTATCCAACCTGCCCACCACTTGGGAATAACCTTGCGAAAGTAAGACTAATGCCCAATGACATTGAGTGCAGACATCTAATCTCAATTAAAGATTTATCGGTGATGGATGGGGATGCGTCCGATTAGCTTGTTGGCGGGGTAACGGCCCACCAAGGCAACGATCGGTAGGGGTTCTGAGAGGAAGGTCCCCCACATTGGAACTGAGACACGGTCCAA	0	0.0681431	0	0	0	0	Bacteroidetes	Bacteroidia	Bacteroidales	Prevotellaceae	Prevotella	Prevotella
321	GATGAACGCTGGCGGCGCATTTAAGACATGCAAGTCGAACGAAGAATTTGCACCGAATGAAAGATGAAGATTCATCAGATTCTGGATTTCACCGTAAATTCTTAGTGGCGGACGGGTGAGTAATACGTAGATAATCTGCCTTTTAGAGGGAAATAACAGAGAGAAATTTCTGCTAATGTCCCATAAGACCACACTATGGCATCTTAGAGTGATCAAAGGAGCAATCCGCTAAGAGATGAGTCTACGGCTGATTAGCCAGTTGGCAGTGTAATGGACTACCAAAGCTATGATCAGTAGCCGAGCTGAGAGGCTGGCCGGCCACATTGGGACTGAGACACGGCCCAG	0	0.0681431	0	0	0	0	Firmicutes	Clostridia	Clostridiales	Ruminococcaceae	unclassified_Ruminococcaceae	Ruminococcaceae
322	GATGAACGCTAGCGGCAGGCCTAATACATGCAAGTCGAACGGGATTGCAGTGTAGCTTGCTATACTGCATGAGAGTGGCGAACGGGTGCGTAACGCGTGAGCAACCTGCCCATATCTGGGGGATAGCCCGGCGAAAGTCGGATTAACACCGCATAAGAATGTACCACTGCATGGTGGAGCATTTAAATATTTATAGGATATGGATGGGCTCGCGTGACATTAGCTAGTTGGTAAGGTAACGGCTTACCAAGGCTATGATGTCTAGGGGCTCTGAGAGGAGAACCCCCCACACTGGTACTGAGACACGGACCAG	0	0.0681431	0	0	0	0	Bacteroidetes	Sphingobacteriia	Sphingobacteriales	Sphingobacteriaceae	unclassified_Sphingobacteriaceae	Sphingobacteriaceae
323	GATGAACGCTGGCGGCGTGCTTAACACATGCAAGTCGAACGGGATCCCTGGCAGCTTGCTGCCGGGGTGAGAGTGGCGAACGGGTGAGTAATGCGTGACCGACCTGCCCCATGCACCGGAATAGCTCCTGGAAACGGGTGGTAATGCCGGATGTTCCACATGAGCGCATGCGAGTGTGGGAAAGGCTTTTTGCGGCATGGGATGGGGTCGCGTCCTATCAGCTTGTTGGTGGGGTAACGGCCTACCAAGGCGTTGACGGGTAGCCGGCCTGAGAGGGCGACCGGCCACATTGGGACTGAGATACGGCCCAG	0	0	0.0552639	0	0	0	Actinobacteria	Actinobacteria	Bifidobacteriales	Bifidobacteriaceae	Bifidobacterium	Bifidobacterium_pseudolongum
324	GACGAACGCTGGCGGCGTGCTTAACACATGCAAGTCGAGCGGAAAGGCCACTTCGGTGGTACTCGAGCGGCGAACGGGTGAGTAACGCGTGGGAACGTACCTTTTGCTACGGAATAGCCCTGGGAAACTGGGAGTAATACCGTATGTGCCCTTCGGGGGAAAGATTTATCGGCAAAAGATCGGCCCGCGTTGGATTAGCTAGTTGGTGAGGTAAAGGCTCACCAAGGCGACGATCCATAGCTGGTTTGAGAGGATGATCAGCCACACTGGGACTGAGACACGGCCCAG	0	0	0.0552639	0	0	0	Proteobacteria	Alphaproteobacteria	Rhizobiales	Brucellaceae	Brucella	Brucella
325	GATGAACGCTGGCGGCGTGCTTAACACATGCAAGTCGAGCGATGAAGTTTCCTTCGGGAAATGGATTAGCGGCGGACGGGTGAGTAACACGTGGGTAACCTGCCTCATAGAGTGGAATAGCCTTCCGAAAGGAAGATTAATACCGCATAATGTTGAAAGATGGCATCATCATTCAACCAAAGGAGCAATCCGCTATGAGATGGACCCGCGGCGCATTAGCTAGTTGGTGAGATAACAGCCCACCAAGGCGACGATCAGTAGCCGGTCTGAGAGGATGAACGGCCACATTGGAACTGAGACACGGTCCAA	0	0	0.0552639	0	0	0	Firmicutes	Clostridia	Clostridiales	Clostridiaceae1	Clostridium_sensu_stricto	Clostridium_sensu_stricto
326	GACGAACGCTGGCGGCGTGCTTAACACATGCAAGTCGAACGGTGAAGCTCAAGCTTGCTTGGGTGGATCAGTGGCGAACGGGTGAGTAACACGTGAGCAACCTGCCCCAGACTCTGGAATAAGCGCTGGAAACGGCGTCTAATACTGGATACGAGACCAAGTCGCATGGCTATGGTTTGGAAAGTTTTTCGGTTTGGGATGGGCTCGCGGCCTATCAGCTTGTTGGTGAGGTAATGGCTCACCAAGGCGACGACGGGTAGCCGGCCTGAGAGGGCGACCGGCCACACTGGGACTGAGACACGGCCCAG	0	0	0.0552639	0	0	0	Actinobacteria	Actinobacteria	Micrococcales	Intrasporangiaceae	Janibacter	Janibacter
327	GATGAACGCTGGCGGCGTGCTTAACACATGCAAGTCGAACGAGGCTGCATTGCGGAAGTTTTCGGATGGAAGCGGTGCAGACCGAGTGGCGGACGGGTGAGTAACGCGTGGGGAACCTGCCCCATTCCGGGGGATACCAGTTGGAAACGACTGTTAATACCGCATAAGCGCACAGTGAGACATCTCACAGTGTGAAAAACTGAGGTGGAATGGGATGGCCCCGCGTCTGATTAGCCAGTTGGCAGGGTAACGGCCTACCAAAGCGACGATCAGTAGCCGGCCTGAGAGGGCGACCGGCCACATTGGGACTGAGACACGGCCCAA	0	0	0.0552639	0	0	0	Firmicutes	Clostridia	Clostridiales	Lachnospiraceae	unclassified_Lachnospiraceae	Lachnospiraceae
328	GATGAACGCTGGCGGCGTGCTTAACACATGCAAGTCGAACGAAGCATAAGAGTTGCTTGCAACACTTATGACTTAGTGGCGGACGGGTGAGTAACGCGTGGGTAACCTACCCTGTACAGGGGGATAACAGTTAGAAATGACTGCTAATACCGCATAAGCACACGCTGTCACATGACAGAGGGTGAAAAGATTTATCGGTACAGGATGGGCCCGCGTCTGATTAGCTAGTTGGTGAGGCAACGGCCTACCAAGGCGACGATCAGTAGCCGGACTGAGAGGTTGAACGGCCACATTGGAACTGAGATACGGTCCAG	0	0	0.0552639	0	0	0	Firmicutes	Clostridia	Clostridiales	Lachnospiraceae	unclassified_Lachnospiraceae	Lachnospiraceae
329	GACGAACGCTGGCGGCGTGCATAACACATGCAGGTCGAACGAGAATCTTCTTTACGGAGCCTTAGGGTGAAGAAAAGGAGAGGACAGTGGCGGATGGGTGAGTAACGCGTAAGGAACCTGCCTTTCACAACGGGATAGCAGTTGGAAACGACTATTAATACCGTATGAAACTGTTTTATCGCATGATGAAGCGGTTAAAGATTTATCGGTGAGAGATGGCCTTGCGTCTGATTAGCTTGTTGGTAGGGTAACGGCCTACCAAGGCGACGATCAGTAGCCGGCTTGAGAGAGTGAACGGCCACATTGGGACTGAGACACGGCCCAA	0	0	0.0552639	0	0	0	Firmicutes	Clostridia	Clostridiales	Peptoniphilaceae	Murdochiella	Murdochiella
330	GACGAACGCTGGCGGCGTGCTTAACACATGCAAGTCGAACGTGATTTTTGTGGAAATTCTTTCGGGAATGGAAATGAAATGAAAGTGGCGAACGGGTGAGTAACACGTGAGCAACCTACCTTACACAGGGGGATAGCCGTTGGAAACGACGATTAATACCGCATGAGACCACAGAATCGCATGATATAGGGGTCAAAGATTTATCGGTGTAAGAAGGGCTCGCGTCTGATTAGCTAGTTGGAAGGGTAAAGGCCTACCAAGGCGACGATCAGTAGCCGGTCTGAGAGGATGAACGGCCACATTGGAACTGAGACACGGTCCAA	0	0	0.0552639	0	0	0	Firmicutes	Clostridia	Clostridiales	Peptoniphilaceae	Parvimonas	Parvimonas_micra
331	GACGAACGCTGGCGGCGCGCTTAACACATGCAAGTCGAGCGATGAAATTTCGACAGATCCCTTCGGGGTGAAGATGAAATGGATTAGCGGCGGACGGGTGAGTAACACGTGAGTAACCTGCCTTAGACATTGGGATAGCCTCGGGAAACCGGGATTAATACCAAATGAAATCACATATGCACATGCATAAATGATCAAAGCTCCGGCGGTCTAAGATGGACTCGCGTCCCATTAGCTAGTTGGTGAGGTAACGGCCCACCAAGGCGACGATGGGTAGCCGGCCTGAGAGGGTGAACGGCCACATTGGAACTGAGAAACGGTCCAA	0	0	0.0552639	0	0	0	Firmicutes	Clostridia	Clostridiales	Peptoniphilaceae	Peptoniphilus	Peptoniphilus
332	AACGAACGCTGGCGGCAGGCTTAACACATGCAAGTCGAGCGCCCTCTTCGGAGGGAGCGGCAGACGGGTGAGTAACACGTGGGAATCTACCCATCTCTAGGGAATAACTCAGGGAAACTTGTGCTAATACCCTATACGCCCTTCGGGGGAAAGATTTATCGGAGATGGATGAGCCCGCGTTGGATTAGCTAGTTGGTGGGGTAATGGCTCACCAAGGCGACGATCCATAGCTGGTCTGAGAGGATGATCAGCCACACTGGGACTGAGACACGGCCCAG	0	0	0.0552639	0	0	0	Proteobacteria	Alphaproteobacteria	Rhizobiales	Phyllobacteriaceae	Nitratireductor	Nitratireductor
333	GATGAACGCTAGCGACAGGCCTAACACATGCAAGTCGAGGGGCAGCGAGGATGTAGCAATACATTTGTCGGCGACCGGCGCACGGGTGAGTAACGCGTATGCAACCTACCCGACACAGGGGGATAACCCGGAGAAATTCGGACTAATACCGCATAAAACAGGGGTCCCGCATGGGAATATTTGTTAAAGAATTATCGGTGTCGGATGGGCATGCGTTCCATTAGCTAGTTGGTGAGGTAACGGCTCACCAAGGCCACGATGGATAGGGGTTCTGAGAGGAAGGTCCCCCACATTGGTACTGAGACACGGACCAA	0	0	0.0552639	0	0	0	Bacteroidetes	Bacteroidia	Bacteroidales	Porphyromonadaceae	Coprobacter	Coprobacter
334	GACGAACGCTGGCGGCGTGCTTAACACATGCAAGTCGAACGGATCATCTTACACTTGTGTTTGGTGGTTAGTGGCGAACGGGTGAGTAACACGTGAGCAACCTGCCCTTCACTGGGGGATAACGGGAAGAAATTCTTGCTAATACCGCATGTACACCGACTGTCGCATGGTGGTTGGTGGAAAGTTTTTTCGGTGGGGGATGGGCTCGCGGCCTATCAGCTTGTTGGTGGGGTAATGGCCTACCAAGGCTTTGACGGGTAGCCGGCCTGAGAGGGCGACCGGCCACACTGGGACTGAGATACGGCCCAG	0	0	0.0552639	0	0	0	Actinobacteria	Actinobacteria	Propionibacteriales	Propionibacteriaceae	Brevilactibacter	Brevilactibacter
335	AACGAACGCTGGCGGCAGGCCTAACACATGCAAGTCGAGCGCCCTTTCGGGGGAGCGGCGGACGGGTGAGTAACGCGTGGGAATATGCCCTTCTCTACGGAATAGCCTCGGGAAACTGAGAGTAATACCGTATACGCCCTGTGGGGGAAAGATTTATCGGGGAAGGATTAGCCCGCGTTGGATTAGGTAGTTGGTGGGGTAATGGCCTACCAAGCCGACGATCCATAGCTGGTTTGAGAGGATGATCAGCCACACTGGGACTGAGACACGGCCCAG	0	0	0.0552639	0	0	0	Proteobacteria	Alphaproteobacteria	Rhodobacterales	Rhodobacteraceae	Paracoccus	Paracoccus_marinus
336	GACGAACGCTGGCGGCGTGCCTAACACATGCAAGTCGAACGGAGTTAATATGGAAGTGCTTTCGGGTGTGGAAGTGTTAACTTAGTGGCGAACGGGTGAGTAACGCGTGAGAAACCTGCCTCTCAGTGGGGGACAACAGTTGGAAACGACTGCTAATACCGCATAACACTTTAGTACCGCATGGTACAGAAGTCAAAGCTTTATGTGCTGAGAGATGGTCTCGCGTCTGATTAGCTAGATGGCGGGGTAACGGCCCACCATGGCGACGATCAGTAGCCGGTCTGAGAGGATGAACGGCCACATTGGGACTGAGATACGGCCCAG	0	0	0.0552639	0	0	0	Firmicutes	Clostridia	Clostridiales	Ruminococcaceae	unclassified_Ruminococcaceae	Ruminococcaceae
337	GATGAACGCTAGCGGCAGGCCTAATACATGCAAGTCGAACGGGATCCGGGGGTAGCTTGCTACCTTCGGTGAGAGTGGCGCACGGGTGCGTAACGCGTGAGCAACCTGCCCGTCCCAGGGGGATAGCCCCTCGAAAGAGGGATTAACACCGCATGACGCTGGAGGATGGCATCATCTTCCAGCCAAATATTCATAGGGGACGGATGGGCTCGCGTGGCATTAGCTAGTTGGTAAGGTAACGGCTTACCAAGGCAACGATGCCTAGGGGCTCTGAGAGGAGAATCCCCCACACTGGTACTGAGACACGGACCAG	0	0	0.0552639	0	0	0	Bacteroidetes	Sphingobacteriia	Sphingobacteriales	Sphingobacteriaceae	Parapedobacter	Parapedobacter
338	ATTGAACGCTGGCGGCATGCTTTACACATGCAAGTCGAACGGCAGCATAGAGAGCTTGCTCTCTGATGGCGAGTGGCGAACGGGTGAGTAATGCATCGGAACGTGTCCGTTTGTGGGGGACAACTATCCGAAAGGATAGCTAATACCGCATGAGACCTGAGGGTGAAAGCCGGGGACCGCAAGGCCTGGCGCAAACGGAGCGGCCGATGTCTGATTAGCTAGTTGGGGAGGTAACGGCTCACCAAGGCGACGATCAGTAGCTGGTCTGAGAGGACGACCAGCCACACTGGAACTGAGACACGGTCCAG	0	0	0.0552639	0	0	0	Proteobacteria	Betaproteobacteria	Burkholderiales	Sutterellaceae	Duodenibacillus	Duodenibacillus
339	GACGAACGCTGGCGGCGTGCTTAACACATGCAAGTCGAACGAGGAAATTGACTTCGGTTGATTTTCGAGTGGCGGACGGGTGAGTAACGCGTGAGCAATCTGTCCTACAGAGGGGGATAACAACTGGAAACAGTTGCTAATACCGCATAAGACCACACTGCCGCATGGCAGAGAGGTAAAAGGAGCAATCCGCTGTAGGGTGAGCTCGCGTCCGATTAGATAGTTGGTGAGGTAACGGCCCACCAAGTCTGCGATCGGTAGCCGACCTGAGAGGGTGATCGGCCACATTGGGACTGAGACACGGCCCAG	0	0	0.0552639	0	0	0	Firmicutes	Clostridia	Clostridiales	unclassified_Clostridiales	unclassified_Clostridiales	Clostridiales
340	GACGAACGCTGGCGGCGTGCCTAACACATGCAAGTCGAGCGGAGACAGTGAGTAGCTTGCTATGAGCTGTTTTAGCGGCGGACGGGTGAGTAACGCGTGAGCAACCTTTCCCAGACAGGGGAATAACATACCGAAAGGTGTACTAATACCGCATAAGACCACGGGATCACATGGTTCTGGGGTAAAAGATTTATCGGTTTGGGGTGGGCTCGCGTCCGATTAGGTAGTTGGTGAGGTAACGGCCCACCAAGCCGACGATCGGTAGCCGACCTGAGAGGGTGATCGGCCACATTGGGACTGGGATACGGCCCAG	0	0	0.0552639	0	0	0	Firmicutes	Clostridia	Clostridiales	unclassified_Clostridiales	unclassified_Clostridiales	Clostridiales
341	GATGAACGCTGGCGGCATGCCTAAGACATGCAAGTCGAACGAAGTGGCCCAATGAAGAATGCGAGCTTGCTCAAATTCGGATTTGGTTTACCACTTAGTGGCGCAAGGGTGAGTAACACGTGGGTAATCTACCTTCGAGTCTGGAATAACAGTTAGAAATGATTGCTAATGCCGGATGAAATTGAGAACGATAATTCATTCTTTATTAAAAGGAGCCTTTAAAGCTTCGCTTGAAGATGAGCCTGCGACGTATTAGCTAGTTGGTGGGGTAATGGCCTACCAAGGCAACGATGCGTAGCCGACCTGAGAGGGTGATCGGCCACACTGGGACTGAGACACGGCCCAG	0	0	0.0552639	0	0	0	Firmicutes	unclassified_Firmicutes	unclassified_Firmicutes	unclassified_Firmicutes	unclassified_Firmicutes	Firmicutes
342	GATGAACGCTAGCGGGAGGCTTAATACATGCAAGTCGAGGGGTAACATGGGTGCTTGCACCTGATGACGACCGGCGCACGGGTGAGTAACGCGTACACGACCTACCTTTAAGAACGGGATAGCCCTGGGAAACTGGGATTAATACCGTATGTGATTATAATTAATAAGTATTTATAATTAAAGATTTTATCGCTTAAAGATGGGTGTGCGTTTGATTAGCTAGTTGGTAGGGTAACGGCCTACCAAGGCGACGATCAATAGGGGGCGTGAGAGCGTGGACCCCCACACGGGTACTGAGACACGGACCCG	0	0	0.0552639	0	0	0	Bacteroidetes	Saprospiria	Saprospirales	unclassified_Saprospirales	unclassified_Saprospirales	Saprospirales
343	GATGAACGCTAGCGGGAGGCTTAACACATGCAAGCCGAGGGGTATGTAGTTTTCGGATTACAGAGACCGGCGTACGGGTGCGTAACGCGTATGTAACTTGCCCTATTGAATGGGATAGCCCAGGGAAACTTGGATTAATACCGTATAACACATTAGATGGCATCATTTAGTGTTGAAAGATTTATCGCAATAGGATAGACATGCGTATGATTAGGTAGTTGGTAGAGTAATGGCCTACCAAGCCGATGATCATTAGGGGGCCTGAGAGGGTGAACCCCCACACTGGTACTGAGACACGGACCAG	0	0	0.0552639	0	0	0	Bacteroidetes	Flavobacteriia	Flavobacteriales	Weeksellaceae	Moheibacter	Moheibacter
344	ATTGAACGCTGGCGGCAGGCTTAACACATGCAAGTCGAGCGGAGATGAGGTGCTTGCACCTTATCTTAGCGGCGGACGGGTGAGTAATGCTTAGGAATCTGCCTATTAGTGGGGGACAACATTCCGAAAGGAATGCTAATACCGCATACGTCCTACGGGAGAAAGCAGGGGATCTTCGGACCTTGCGCTAATAGATGAGCCTAAGTCGGATTAGCTAGTTGGTGGGGTAAAGGCCTACCAAGGCGACGATCTGTAGCGGGTCTGAGAGGATGATCCGCCACACTGGGACTGAGACACGGCCCAG	0	0	0	0	0	0.0537057	Proteobacteria	Gammaproteobacteria	Pseudomonadales	Moraxellaceae	Acinetobacter	Acinetobacter_junii
345	GATGAACGCTAGCGACAGGCTTAACACATGCAAGTCGAGGGGCAGCATGATTTGTAGCAATACAGATTGATGGCGACCGGCGCACGGGTGAGTAACGCGTATGCAACTTACCTATCAGAGGGGGATAGCCCGGCGAAAGTCGGATTAATACCCCATAAAACAGGGGTCCCGCATGGGAATATTTGTTAAAGATTCATCGCTGATAGATAGGCATGCGTTCCATTAGGCAGTTGGCGGGGTAACGGCCCACCAAACCGACGATGGATAGGGGTTCTGAGAGGAAGGTCCCCCACATTGGTACTGAGACACGGACCAA	0	0	0	0	0.0517777	0	Bacteroidetes	Bacteroidia	Bacteroidales	Porphyromonadaceae	Parabacteroides	Parabacteroides_merdae
346	AATCAACGCTGGCGGCGTGCCTCAGACATGCAAGTCGAACGATTAAAGCTCTCTTCGGAGAGTGTATAAAGTGGCGCACGGGTGAGTAACACGTAAGTAATCTACCTTCGAGTGGGGAATAACGTCCGGAAACGGGCGCTAATACCGCATAATGCAGCGGCATCGCAAGATGACAGTTGTTAAAGGAGCGATTCGCTTGAAGAGGAGCTTGCGGCAGATTAGCTAGTTGGTAGGGTAACGGCCTACCAAGGCTACGATCTGTATCCGGCCTGAGAGGGCGGTCGGACACACTGACACTGAATAACGGGTCAG	0	0	0.0414479	0	0	0	Acidobacteria	Blastocatellia	Blastocatellales	Blastocatellaceae	Stenotrophobacter	Stenotrophobacter
347	GACGAACGCTGGCGGCATGCCTAATACATGCAAGTCGAACGCTGAAGCACTCTGCTTGCAGAGTGCGGATGAGTGGCGAACGGGTGAGTAACACGTGGGAAATCTACCTAAAAGTGGGGGATAACATTCGGAAACGGATGCTAATACCGCATATCTTCAAGAACCGCATGGTTCCTGAACGAAAGACGGCTTCGGCTGTCGCTCTTAGATGATCCCGCGGCGTATTAGTTAGTTGGTGGGGTAAAGGCCTACCAAGACAATGATACGTAGCCGACCTGAGAGGGTGATCGGCCACACTGGGACTGAGAACGGCCCAG	0	0	0.0414479	0	0	0	Firmicutes	Bacilli	Lactobacillales	Carnobacteriaceae	Atopostipes	Atopostipes
348	GATGAACGCTGGCGGCGTGCCTAACACATGCAAGTCGAGCGAGAATTTGTGGAAGTTTCCCTTCGGGGAAACGGAAGCGAAGGAAAGCGGCGGACGGGTGAGTAACGCGTAGGTAACCTGCCCTTCACACGGGGATAGCCACCGGAAACGGTGATTAATACCCGATAGTCCGGACCATCACATGGTGATCCGGGGAAAGATTTATCGGTGAAGGATGGACCTGCGTCTGATTAGCTAGTTGGTGAGGTAATGGCTCACCAAGGCAATGATCAGTAGCCGACCTAAGAGGGTGACCGGCCACACTGGGACTGAGACACGGCCCAG	0	0	0.0414479	0	0	0	Firmicutes	Clostridia	Clostridiales	Clostridiales_Incertae_Sedis_XII	Guggenheimella	Guggenheimella
349	ATTGAACGCTGGCGGCATGCTTTACACATGCAAGTCGAACGGTAACAGGCCTTCGGGCGCTGACGAGTGGCGAACGGGTGAGTAATGCATCGGAACGTGCCCGGTCGTGGGGGATAACACTTCGAAAGAAGTGCTAATACCGCATACGATCTGAGGATGAAAGCGGGGGACCTTCGGGCCTCGCGCGATCGGAGCGGCCGATGTCAGATTAGGTAGTTGGTGGGATAAAAGCTTACCAAGCCAACGATCTGTAGCTGGTCTGAGAGGACGACCAGCCACACTGGGACTGAGACACGGCCCAG	0	0	0.0414479	0	0	0	Proteobacteria	Betaproteobacteria	Burkholderiales	Comamonadaceae	Hydrogenophaga	Hydrogenophaga
350	GACGAACGCTGGCGGCGTGCTTAACACATGCAAGTCGAACGCTGAAACCAGATGCTTGCATTTGGTGGATGAGTGGCGAACGGGTGAGTAACACGTGGGTGATCTGCCCTACACTTTGGGATAAGCCTGGGAAACTGGGTCTAATACCGAATATTCACACCACCGTAGGGGTGGTGTGGAAAGCTTTATGCGGTGTGGGATGAGCCTGCGGCCTATCAGCTTGTTGGTGGGGTAATGGCCTACCAAGGCGTCGACGGGTAGCCGGCCTGAGAGGGTGTACGGCCACATTGGGACTGAGACACGGCCCAG	0	0	0.0414479	0	0	0	Actinobacteria	Actinobacteria	Mycobacteriales	Corynebacteriaceae	Corynebacterium	Corynebacterium_glutamicum
351	GATGAACGCTAGCGGCAGGCTTAATACATGCAAGTCGAGGGGGCATTTCGGTGTCACCGGCGAACGGGTGCGTAACGCGTATGCAACCTGGCCATATCAGGGGGATAGCCCTAGGAAACTGGGATTAATACCGCATAATACATTATCCGGCATCGGGTGATGTTGAAAGATTTATCGGATATGGATGGGCATGCGTAGGATTAGTTAGTTGGTGAGGTAACGGCTTACCAAGGCGATGATCCTTAGGGGCTCTGAGAGGAGTATCCCCCACACTGGCACTGAGATACGGGCCAG	0	0	0.0414479	0	0	0	Bacteroidetes	Cytophagia	Cytophagales	Cytophagaceae	Leadbetterella	Leadbetterella
352	GATGAACGCTGGCGGCGCGCCTAACACATGCAAGTCGAACGGTTAAGGCCCCCTTTAGGGGGCGCATAGAGTGGCGAACGGGTGAGTAACACGTGACCAACCCGCCCCCCCACCGGGACAACCTCGGGAAACCGAGGCTAATACCGGATACGCCGGGGCCCCCGCATGGGGGCTCCGGGAAAGCCTTGGCGGGAGGGGACGGGGTCGCGGCCCATCAGGTAGACGGCGGGGCGAAGGCCCGCCGTGCCGACGACGGGTAGCCGGGCTGAGAGGCCGATCGGCCACATTGGGACTGAGACACGGCCCAG	0	0	0.0414479	0	0	0	Actinobacteria	Coriobacteriia	Eggerthellales	Eggerthellaceae	Slackia	Slackia_exigua
353	GACGAACGCTGGCGGCGTGCTTAACACATGCAAGTCGAGCGAGGTCCTACCGGTGGCAACACCGGGAAAGACCTAGCGGCGAACGGGTGAGTAACACGTGAGGAACCTGCCCCGAAGACCGGGATAACCCTCCGAAAGGGGGGCTAATACCGGATACCCTCTTCCGGTCGCATGGCTGGATGAGGAAAGGGCTTTACCGCTTCGGGAGGGCCTCGCGGCCTATCAGCTTGTTGGTGAGGTAACGGCTCACCAAGGCGACGACGGGTAGCTGGTCTGAGAGGACGATCAGCCACACTGGGACTGAGACACGGCCCAG	0	0	0.0414479	0	0	0	Actinobacteria	Acidimicrobiia	Acidimicrobiales	Iamiaceae	unclassified_Iamiaceae	Iamiaceae
354	GATGAACGCTGGCGGCGTGCCTAACACATGCAAGTCGAACGGAGTTTATATTATGAAGTCTTCGGATGAATTGATATAAACTTAGTGGCGGACGGGTGAGTAACGCGTGGGTAACCTGCCTCATACAGGGGGATAACAGCCGGAAACGGTTGCTAAAACCGCATAAGCGCACAGCAGCGCATGCTGCAGTGTGAAAATATTTTATAGGTATGAGATGGGCCCGCGTCTGATTAGCTAGTTGGTGAGGTAACTGCTCACCAAGGCGACGATCAGTAGCCGGCTTGAGAGAGTGACCGGCCACATTGGGACTGAGACACGGCCCAA	0	0	0.0414479	0	0	0	Firmicutes	Clostridia	Clostridiales	Lachnospiraceae	Herbinix	Herbinix
355	GATGAACGCTGGCGGCGTGCTTAACACATGCAAGTCGAACGAAGCACTTATGATTGAGATTTCGGTTGATTGACTAAGTGACTTAGTGGCGGACGGGTGAGTAACGCGTGGGTAACCTGCCTCGTACAGGGGGATAACAGTTGGAAACGACTGTTAATACCGCATAAGCGCACGGTATCGCATGGTACAGTGTGAAAAACTCCGGTGGAATAGGATGGTCCCGCGTCTGATTAGGCAGTTGGCGGGGTAACGGCCCACCAAACCGACGATCAGTAGCCGACCTGAGAGGGTGACCGGCCACATTGGGACTGAGACACGGCCCAA	0	0	0.0414479	0	0	0	Firmicutes	Clostridia	Clostridiales	Lachnospiraceae	unclassified_Lachnospiraceae	Lachnospiraceae
356	GATGAACGCTGGCGGCGTGCTTAACACATGCAAGTCGAACGAAACACCTGTGATTGAGACTTCGGTTGATTGACCAGGTGATTGAGTGGCGGACGGGTGAGTAACGCGTGGGTAACCTGCCTCATACAGGGGGATAACAGTTAGAAATGACTGCTAATACCGCATAAGCGCACAGGACCGCATGGTCCAGTGTGAAAAACTCCGGTGGTATGAGATGGACCCGCGTTGGATTAGATAGTTGGCGGGGTAACGGCCCACCAAGTCGACGATCCATAGCCGGCCTGAGAGGGTGAACGGCCACATTGGGACTGAGACACGGCCCAA	0	0	0.0414479	0	0	0	Firmicutes	Clostridia	Clostridiales	Lachnospiraceae	unclassified_Lachnospiraceae	Lachnospiraceae
357	GATGAACGCTAGCGACAGGCCTAACACATGCAAGTCGAGGGGCAGCATGAAATTAGCTTGCTAATTTTGATGGCGACCGGCGCACGGGTGAGTAACACGTATGCAACCTGCCTGTAAGCGGGGGATAACCCGGAGAAATTCGGACTAATACCGCATAATATCATTGATTCGCATGTTTCAATGATTAAAAATTTATTGCTTACAGATGGGCATGCGTATGATTAGCTAGTTGGCGGGGTAACGGCCCACCAAGGCGACGATCATTAGGGGTTCTGAGAGGAAGGTCCCCCACATTGGAACTGAGACACGGTCCAA	0	0	0.0414479	0	0	0	Bacteroidetes	Bacteroidia	Bacteroidales	Paludibacteraceae	Paludibacter	Paludibacter
358	GACGAACGCTGGCGGCGTGCTTAACACATGCAAGTCGAACGGGATTTAGTAAACAGAAGCCTCGGTGGAAGATTACTAATGAGAGTGGCGAACGGGTGAGTAACGCGTGAGCAACCTGCCTATGACAGCGGGATAGCCTCGGGAAACCGGGATTAATACCGCATAAAATCGTAGAAACACATGTTTTAACGGTCAAAGATTTATCGGTCATAGATGGGCTCGCGTCTGATTAGCTAGTTGGTGAGATAACAGCTCACCAAGGCGACGATCAGTAGCCGGTCTGAGAGGATGAACGGCCACATTGGAACTGAGACACGGTCCAA	0	0	0.0414479	0	0	0	Firmicutes	Clostridia	Clostridiales	Peptoniphilaceae	Finegoldia	Finegoldia_magna
359	GACGAACGCTGGCGGCGTGCCTAATACATGCAAGTCGAGCGGATGATGAAGAAGCTTGCTTCTTCTGATTTAGCGGCGGATGGGTGAGTAACACGTGGGCAACCTGCCCTGTAGATTGGGATAACTCCGGGAAACCGGGGCTAATACCGAATAATCCATTCCTTCTCATGGAGGAATGTTAAAAGACGGCATCTCGCTGTCACTACAGGATGGGCCCGCGGCGCATTAGCTAGTTGGTGAGGTAACGGCTCACCAAGGCGACGATGCGTAGCCGACCTGAGAGGGTGATCGGCCACACTGGGACTGAGACACGGCCCAG	0	0	0.0414479	0	0	0	Firmicutes	Bacilli	Bacillales	Planococcaceae	Psychrobacillus	Psychrobacillus
360	GATGAACGCTAGCGATAGGCTTAACACATGCAAGTCGAGGGGCAGCGAGATGTAGCAATACATTGTCGGCGACCGGCGAATGGGTGCGTAACACGTATGCAACTTACCTTTTAGAGGCGAATAACCCGATGAAAGTCGGACTAATACGCCATATGCTCCCTTAGTCACATGATTAATGGAGGAAAGATTCATCGCTAAGAGATAGGCCTGCGTTCCATTAGCTAGTTGGAGAGGTAACGGCTCACCAAGGCAACGATGGATAGGGGGACTGAGAGGTTGACCCCCCACATTGACACTGAGATACGGGTCAA	0	0	0.0414479	0	0	0	Bacteroidetes	Bacteroidia	Bacteroidales	Porphyromonadaceae	Porphyromonas	Porphyromonas
361	GATGAACGCTAGCGATAGGCTTAACACATGCAAGTCGAGGGGCATCGAGGGTAGCAATACCTGTCGGCGACCGGCGCACGGGTGAGTAACGCGTATGTAACCTGCCCGCAACAGAGGGATAACCCGGCGAAAGTCGGACTAATACCTCATAAAACAGGGGTTCCGCATGGGGCTATTTGTTAAAGATTTATTGGTTGCGGATGGGCATGCGTACCATTAGGTAGTTGGTGAGGTGACGGCTCACCAAGCCATCGATGGTTAGGGGTTCTGAGAGGAAGGTCCCCCACACTGGTACTGAGACACGGACCAG	0	0	0.0414479	0	0	0	Bacteroidetes	Bacteroidia	Bacteroidales	Porphyromonadaceae	Tannerella	Tannerella_forsythia
362	GATGAACGCTAGCTACAGGCCTAACACATGCAAGTCGAGGGGCAGCATGATGATTGCTTGCAATCGTTGATGGCGACCGGCGCACGGGTGAGTAACGCGTATCCAACCTACCCATGACTAAGGGATAACCCGTCGAAAGTCGGCCTAATACCTTATGTCATCCGAAGCAGGCATCTAATTTGGATGAAAGATTAATTGGTGATGGATGGGGATGCGTCTGATTAGCTTGTCGGTGAGGTAACGGCTCACCGAGGCGACGATCAGTAGGGGTTCTGAGAGGAAGGTCCCCCACATTGGAACTGAGACACGGTCCAA	0	0	0.0414479	0	0	0	Bacteroidetes	Bacteroidia	Bacteroidales	Prevotellaceae	Prevotella	Prevotella_enoeca
363	ATTGAACGCTGGCGGCAGGCCTAACACATGCAAGTCGAGCGGATGAAGGTAGCTTGCTACCGGATTCAGCGGCGGACGGGTGAGTAATGCCTAGGAATCTGCCCGATAGTGGGGGATAACGTTCCGAAAGGAACGCTAATACCGCATACGTCCTACGGGAGAAAGCGGGGGATCTTCGGACCTCGCGCTATCGGATGAGCCTAGGTCGGATTAGCTAGTTGGTGAGGTAATGGCTCACCAAGGCGACGATCCGTAGCTGGTCTGAGAGGATGATCAGCCACACTGGGACTGAGACACGGCCCAG	0	0	0.0414479	0	0	0	Proteobacteria	Gammaproteobacteria	Pseudomonadales	Pseudomonadaceae	Pseudomonas	Pseudomonas
364	AACGAACGCTGGCGGCAGGCTTAACACATGCAAGTCGAGCGATCCTTTCGGGGATAGCGGCGGACGGGTGAGTAACGCGTGGGAACGTGCCCTTTTCTACGGAATAGCCCAGGGAAACTTGGATTAATACCGTATACGCCCTTTTGGGGAAAGATTTATCGGAGAAGGATCGGCCCGCGTTGGATTAGGTAGTTGGTGGGGTAATGGCCTACCAAGCCTTCGATCCATAGCTGGTTTGAGAGGATGATCAGCCACACTGGGACTGAGACACGGCCCAG	0	0	0.0414479	0	0	0	Proteobacteria	Alphaproteobacteria	Rhodobacterales	Rhodobacteraceae	Paracoccus	Paracoccus
365	GATGAACGCTAGCGGCAGGCTTAACACATGCAAGTCGAGGGGCAGCATAAACATTGCTTGCAATGTTTGATGGCGACCGGCGCACGGGTGCGTAACGCGTATGCAACCTACCTATAACAGGGGGATAACACTGAGAAATTGGTACTAATACCCCGTAACATCAGAGAGGGCATCCTTTTTGGTTGAAAGTTCCGGCGGTTATAGATGGGCATGCGTTGTATTAGCTAGTAGGTGAGGTAACGGCTCACCTAGGCGACGATACATAGGGGGACTGAGAGGTTAACCCCCCACATTGGAACTGAGACACGGTCCAA	0	0	0.0414479	0	0	0	Bacteroidetes	Bacteroidia	Bacteroidales	Rikenellaceae	Alistipes	Alistipes
366	GACGAACGCTGGCGGCGTGCCTAACACATGCAAGTCGAACGGAGTCGGCCCCGCAAGGGACTGACTTAGTGGCGAACGGGTGAGTAACGCGTGAGCAACCTGCCTTTCAGTGGGGGACAACAGTTGGAAACGACTGCTAATACCGCATGATGCATTTTGACCGCATGATCGAGATGCCAAAGATTTATTGCTGAAAGATGGGCTCGCGTCTGATTAGATAGTTGGTGAGGTAACGGCCCACCAAGTCGACGATCAGTAGCCGGACTGAGAGGTTGAACGGCCACATTGGGACTGAGATACGGCCCAG	0	0	0.0414479	0	0	0	Firmicutes	Clostridia	Clostridiales	Ruminococcaceae	unclassified_Ruminococcaceae	Ruminococcaceae
367	GATTAACGCTGGCGGCGTGCATAACACATTCAAGTCGAACGGAGTTACCTGCTTCGGTAGGTAACTCAGTGGCGGACGGGTGAGTAACGCGTGAGCAATCTACCCTCGGGTACGGAATAACAACCGGAAACAGTTGCTAATACCGTATGAAATGGCAGTACCGCATGGTACAACCATCAAAGATTTATTGCCCGGGGATGAGCTTGCGTCCGATTAGATAGTTGGCGGGGTAAAGGCCCACCAAGTCGACGATCGGTAGCCGGACTGAGAGGTTGAACGGCCACATTGGAACTGAGATACGGTCCAG	0	0	0.0414479	0	0	0	Firmicutes	Clostridia	Clostridiales	Ruminococcaceae	unclassified_Ruminococcaceae	Ruminococcaceae
368	GACGAACGCTGGCGGCGTGCCTAACACATGCAAGTCGAACGGGGTTAGAGCGGAAGTACCTTCGGGTGCGGAAACTTTAACTTAGTGGCGAACGGGTGAGTAACGCGTGAGAAACCTGCCTCTCAGTGGGGGACAACAGTTGGAAACGACTGCTAATACCGCATAACACTTTAGTACCGCATGGTACAGAAGTCAAAGCTTTATGTGCTGAGAGATGGTCTCGCGTCTGATTAGCTAGATGGCGGGGTAACGGCCCACCATGGCGACGATCAGTAGCCGGTCTGAGAGGATGAACGGCCACATTGGGACTGAGATACGGCCCAG	0	0	0.0414479	0	0	0	Firmicutes	Clostridia	Clostridiales	Ruminococcaceae	unclassified_Ruminococcaceae	Ruminococcaceae
369	GACGAACGCTGGCGGCGTGCCTAACACATGCAAGTCGAACGGGGTTAAGAGCTTCGGCTTTTAACTTAGTGGCGAACGGGTGAGTAACGCGTGAGAAACCTGCCTCTCAGTGGGGGACAACAGTTGGAAACGACTGCTAATACCGCATAATGTTACCGGAAGGCATCTTCTGGTAACCAAAGCTTTATGTGCTGAGAGATGGTCTCGCGTCTGATTAGCTAGTTGGTGGGGTAACGGCTCACCAAGGCGACGATCAGTAGCCGGTCTGAGAGGATGAACGGCCACATTGGGACTGAGATACGGCCCAG	0	0	0.0414479	0	0	0	Firmicutes	Clostridia	Clostridiales	Ruminococcaceae	unclassified_Ruminococcaceae	Ruminococcaceae
370	GATGAACGCTAGCGGCAGGCCTAATACATGCAAGTCGAACGGGATCCTTATCAAAGCTTGCTTTGATTTGGTGAGAGTGGCGCACGGGTGCGTAACGCGTGAGCAACCTACCCTTGTCAGGGGGATAGCCCGGCGAAAGTCGGATTAACACCGCATGACATTGCGAGATGGCATCATTTTGCAATTAAATATTTATAGGACAAGGATGGGCTCGCGTGACATTAGCTAGTTGGTAAGGTAACGGCTTACCAAGGCTACGATGTCTAGGGGCTCTGAGAGGAGAATCCCCCACACTGGTACTGAGACACGGACCAG	0	0	0.0414479	0	0	0	Bacteroidetes	Sphingobacteriia	Sphingobacteriales	Sphingobacteriaceae	Sphingobacterium	Sphingobacterium
371	GACGAACGCTGGCGGCGTGCCTAATACATGCAAGTAGAACGCTGAAGACTTTAGCTTGCTAAAGTTGGAAGAGTTGCGAACGGGTGAGTAACGCGTAGGTAACCTGCCTACTAGCGGGGGATAACTATTGGAAACGATAGCTAATACCGCATAACAGCATTTAACCCATGTTAGATGCTTGAAAGGAGCAATTGCTTCACTAGTAGATGGACCTGCGTTGTATTAGCTAGTTGGTGAGGTAACGGCTCACCAAGGCGACGATACATAGCCGACCTGAGAGGGTGATCGGCCACACTGGGACTGAGACACGGCCCAG	0	0	0.0414479	0	0	0	Firmicutes	Bacilli	Lactobacillales	Streptococcaceae	Streptococcus	Streptococcus_lutetiensis/infantarius
372	ATTGAACGCTGGCGGCAGGCTTAATACATGCAAGTCGAACGGTAACAGCAGAAAAGCTTGCTTTTTTGGCTGACGAGTGGCGGACGGGTGAGTAATACCTAGGAAACTGCCTAAACGAGGGGGATAACATTTGGAAACGAGTGCTAATACCGCATAATACTGAGAAGTCAAAGGTTGGTTTACCAATCGCGTTTAGATGTGCCTAGGAGGGATTAGCTAGTTGGTGGGGTAAAGGCCTACCAAGGCGATGATCTCTAGCTGGTCTGAGAGGATGACCAGCCACACTGGAACTGAGACACGGTCCAG	0	0	0.0414479	0	0	0	Proteobacteria	Gammaproteobacteria	Aeromonadales	Succinivibrionaceae	Ruminobacter	Ruminobacter
373	GATGAACGCTGGCGGCGTGCCTTAGACATGCAAGTCGAACGAAGCACTTTCTTCTGATCATTTCGGTGTGAAGAAGTTTGTGACTTAGTGGCGAACGGGTGAGTAACACGTGAGTGACCTGCCCCGAAGTGCGGCATAACAGGGGGAAACCCCTGCTAATTCCGCATGTGCTCCCACCTCTTGTGGTGTGAGTAAAGATTTATCGCTTCGGGATGGGCTCGCGGTCCATCAGCTAGTTGGTAGGGTAATGGCCTACCAAGGCGACGACGGATAGCCGGCCTGAGAGGGTGTACGGCCACAGGGGCACTGAGATACGGGCCCC	0	0	0.0414479	0	0	0	Deinococcus-Thermus	Deinococci	Deinococcales	Trueperaceae	Truepera	Truepera
374	GATGAACGCTAGCGGCAGGCTTAACACATGCAAGTCGAGGGGCAGCATGACACGGAGATTCGTCGAAGTGTTGATGGCGACCGGCGCAAGGGTGCGTAACGCGTGAGCAACTTGCCCGCTTCAGGGGGATAACCGGTGGAAACGCCGACTAATACCCCATGGCATTGTCTGGAGGCATCTCCGGGCAATTAAAGAAATTCGGAAGCGGATAGGCTCGCGTGACATTAGCTAGATGGCGGGGTAACGGCCCACCATGGCGACGATGTCTAGGGGTTCTGAGAGGAAGGTCCCCCACACTGGAACTGAGACACGGTCCAG	0	0	0.0414479	0	0	0	Bacteroidetes	Bacteroidia	Bacteroidales	unclassified_Bacteroidetes	unclassified_Bacteroidales	Bacteroidales
375	GACGAACGCTGGCGGCGTGCCTAACACATGCAAGTCGAGCGGGGATGGATGAAGTGCTTGCACAGATTCTATTCTAGCGGCGGACGGGTGAGTAACGCGTGAACAATCTGTCCTAAACAGGGGGATAACAACTGGAAACAGTTGCTAATACCGCATAAGACCACGCTTCCGCATGGAAGAGGGGTAAAAGGAGCAATCCGGTTTAGGGTGAGTTCGCGTCCCATTAGCTAGTTGGTGAGGTAACGGCCCACCAAGGCAACGATGGGTAGCCGACCTGAGAGGGTGATCGGCCACATTGGAACTGAGAGACGGTCCAA	0	0	0.0414479	0	0	0	Firmicutes	Clostridia	Clostridiales	unclassified_Clostridiales	unclassified_Clostridiales	Clostridiales
376	GACGAACGCTGGCGGCGTGCTTAACACATGCAAGTCGAACGAGGATTGATTTGGAAGGGCTTCGGCCTGGAAGGATCAATTCGAGTGGCGGACGGGTGAGTAACGCGTGAGCAACCTGTCCCAGACAGGGGGATAACACTTGGAAACAGGTGCTAATACCGCATAAGACCACAGTAGGACATCCTACAGGGGTAAAAGGAGTAATCCGGTTTGGGGTGGGCTCGCGTCCGATTAGATAGTTGGTGAGGTAACGGCCCACCAAGTCGACGATCGGTAGCCGACCTGAGAGGGTGATCGGCCACATTGGAACTGAGAGACGGTCCAA	0	0	0.0414479	0	0	0	Firmicutes	Clostridia	Clostridiales	unclassified_Clostridiales	unclassified_Clostridiales	Clostridiales
377	GACGAACGCTGGCGGCGTGCTTAACACATGCAAGTCGAGCGGAGACAATTAGCGGAAGTTTTCGGATGGAAGCTGATTGTTTTAGCGGCGGACGGGTGAGTAACGCGTGAGCAACCTTTCCTTCACTGGGGAATAACACAGGGAAACTTGTACTAATACCGCATGAGACCACACCGGGGCATCCTGGAGGGGTCAAAGATTAATTGGTGAAGGGTGGGCTCGCGTCCGATTAGGTAGTTGGTGAGGTAACGGCCCACCAAGCCGACGATCGGTAGCCGACCTGAGAGGGTGATCGGCCACATTGGGACTGAGACACGGCCCAA	0	0	0.0414479	0	0	0	Firmicutes	Clostridia	Clostridiales	unclassified_Clostridiales	unclassified_Clostridiales	Clostridiales
378	AACGAACGCTGGCGGCAGGCTTAACACATGCAAGTCGAACGCCCCCTTCGGGGGGAGTGGCAGACGGGTGAGTAACGCGTGGGAACCTACCCAATTCTACGGAATAACTCAGGGAAACTTGAGCTAATACCGTATACGCCCCAAGGGGGAAAGATTTATCGGAGTTGGATGGGCCCGCGTTGGATTAGCTAGTTGGTAGGGTAATGGCCTACCAAGGCGACGATCCATAGCTGGTCTGAGAGGATGATCAGCCACACTGGGACTGAGACACGGTCCAG	0	0	0.0414479	0	0	0	Proteobacteria	Alphaproteobacteria	Rhizobiales	unclassified_Rhizobiales	unclassified_Rhizobiales	Rhizobiales
379	GATGAACGCTAGCGGGAGGCTTAACACATGCAAGCCGAGGGGTATTTTGTTTTCGGACAAGAGAGACCGGCGGACGGGTGAGTAACGCGTATGTAACTTACCCTATTCAGAGGAATAGCCCGAGGAAACTCGGATTAATACCTTATAACACTTAGAATGGCATCATTTTAGGTTAAAAGATTTATCGGAATAGGATAGACATGCGTCTGATTAGTTAGTTGGTGAGGTAACGGCTCACCAAGACTTCGATCAGTAGGGGGCCTGAGAGGGTGATCCCCCACACTGGTACTGAGACACGGACCAG	0	0	0.0414479	0	0	0	Bacteroidetes	Flavobacteriia	Flavobacteriales	Weeksellaceae	Moheibacter	Moheibacter
380	GATGAACGCTGGCGGCGTGCCTAATACATGCAAGTCGAGCGAACAGACGAGGAGCTTGCTCCTCTGACGTTAGCGGCGGACGGGTGAGTAACACGTGGATAACCTACCTATAAGACTGGGATAACTTCGGGAAACCGGAGCTAATACCGGATAATATATTGAACCGCATGGTTCAATAGTGAAAGATGGTTTTGCTGTCACTTATAGATGGATCCGCGCCGCATTAGCTAGTTGGTAAGGTAACGGCTTACCAAGGCGACGATGCGTAGCCGACCTGAGAGGGTGATCGGCCACACTGGAACTGAGACACGGTCCAG	0	0	0	0	0	0.0402793	Firmicutes	Bacilli	Bacillales	Staphylococcaceae	Staphylococcus	Staphylococcus_epidermidis
381	GACGAACGCTGGCGGCGTGCCTAACACATGCAAGTCGAACGAGAATCTTTGGAATGATTCTTTCGGGATGAATTCCAAAGAGGAAAGTGGCGGACGGGCGAGTAACGCGTGAGTAACCTGCCCATAAGAGGGGGATAATCCATGGAAACGTGGACTAATACCGCATATTGTAGTTAAGTTGCATGACTTGATTATGAAAGATTTATCGCTTATGGATGGACTCGCGTCAGATTAGATAGTTGGTGAGGTAACGGCTCACCAAGTCAACGATCTGTAGCCGAACTGAGAGGTTGATCGGCCGCATTGGGACTGAGACACGGCCCAG	0	0	0	0	0.0345185	0	Firmicutes	Clostridia	Clostridiales	Ruminococcaceae	Monoglobus	Monoglobus
382	GATAAACGCTGGCGGCGCACATAAGACATGCAAGTCGAACGAACTTAACCATTAGTTTACTAGTGGAGCGGTTAGTGGCGGACTGGTGAGTAACACGTAAGCAACCTGCCTATCAGAGGGGAACAACAGTTAGAAATGACTGCTAATACCGCATATGCCTTGAGTATCACATGGTACAAAAGGGAAAGGAGCAATCCGCTGATAGATGGGCTTGCGTCTGATTAGATAGTTGGTGAGGTAACGGCCCACCAAGTCGACGATCAGTAGCCGGACTGAGAGGTTGAACGGCCACATTGGGACTGAGATACGGCCCAG	0	0	0	0	0.0345185	0	Firmicutes	Clostridia	Clostridiales	Ruminococcaceae	unclassified_Ruminococcaceae	Ruminococcaceae
383	GATGAACGCTGGCGGCGTGCTTAACACATGCAAGTCGAACGGGATCCCAGGAGCCTGCTCCTGGGTGAGAGTGGCGAACGGGTGAGTAACACGTGAGCAATCTGCCTTTCAGAGGGGGATACCGATTGGAAACGATCGTTAATACCGCATAATATAATTGAACCGCATGATTTGATTATCAAAGATTTATCGCTGAAAGATGAGCTCGCGTCTGATTAGCTAGTTGGTAAGGTAACGGCTTACCAAGGCGACGATCAGTAGCCGGACTGAGAGGTTGATCGGCCACATTGGGACTGAGACACGGCCCAG	0	0	0	0	0.0345185	0	Firmicutes	Clostridia	Clostridiales	Ruminococcaceae	Ruminococcus	Ruminococcus
384	GACGAACGCTGGCGGCATGCCTAACACATGCAAGTCGAACGGAGAACTCCTTCGGGGGTTCTTAGTGGCGAACGGGTGAGTAACGCGTAGGCAACCTGCCCTTTGGATGGGGACAACATTCCGAAAGGAGTGCTAATACCGAATGTGACGATTTTACCGCATGGTTTAATCGTGAAAGATGGCCTCTACATGTAAGCTATCGCCAAAGGATGGGCCTGCGTCTGATTAGCTAGTTGGTGGGGTAACGGCTCACCAAGGCGACGATCAGTAGCCGGTCTGAGAGGATGAACGGCCACATTGGGACTGAGACACGGCCCAG	0	0	0.0276319	0	0	0	Firmicutes	Negativicutes	Acidaminococcales	Acidaminococcaceae	Phascolarctobacterium	Phascolarctobacterium
385	GATGAACGTTGGCGGTGTGCCTAATACATGCAAGTCGAACGGTGACGATTTTGTAGTAATACGAATGAAATCATAGTGGCGAACGGGTGAGTAACGCGTTGGTGATCTGCCTCGAAGTGTGGAATAACTTCCCGAAAGGGTAGCTAATACCGCATAGTCTCTCAGGGTTTAGAAAACTGAGAGTAAAGGATTTATTCGCTTCGAGAGGAGCCTGCGTCCCATCAGCTAGTTGGTAGGGTAACGGCCTACCAAGGCAATGACGGGTAGGGGACCTGAGAGGGTGGCCCCCCACAATGGAACTGAAACACGGTCCAT	0	0	0.0276319	0	0	0	Chloroflexi	Anaerolineae	Anaerolineales	Anaerolineaceae	unclassified_Anaerolineaceae	Anaerolineaceae
386	GATGAACGCTAGCTACAGGCTTAACACATGCAAGTCGAGGGGTCTTTTGGAGCTTGCTTCAAAAGACGACCGGCGCACGGGTGAGTAACGCGTATCCAACCTGCCCTTCATATTGGTATAGCCTCCCGAAAGGGAGATTAATCCCGAATAACATGAGAGAGTTGCCTGATTTTCTCATGAAAGCTCCGGCGATGAAGGATGGGGATGCGTTCCATTAGGTAGTAGGCGGGGTAACGGCCCACCTAGCCGACGATGGATAGGGGTTCTGAGAGGAAGGTCCCCCACACTGGAACTGAGACACGGTCCAG	0	0	0.0276319	0	0	0	Bacteroidetes	Bacteroidia	Bacteroidales	Bacteroidaceae	unclassified_Bacteroidaceae	Bacteroidaceae
387	GATGAACGCTAGCTACAGGCTTAACACATGCAAGTCGAGGGGCATCAGGGTAGCAATACCGCTGGCGACCGGCGCACGGGTGAGTAACACGTATCCAACCTACCATTCACTCGGGGATAGCCTTTCGAAAGAAAGATTAATACCCGATAGTCTAGGAATAAAGCATTTTATTTTTAGTAAAGAATTTCGGTGTTTGATGGGGATGCGTTCCATTAGATTGTTGGTGAGGTAACGGCTCACCAAGTCTTCGATGGATAGGGGTTCTGAGAGGAAGGTCCCCCACATTGGAACTGAGACACGGTCCAA	0	0	0.0276319	0	0	0	Bacteroidetes	Bacteroidia	Bacteroidales	Bacteroidaceae	Bacteroides	Bacteroides
388	AACGAACGCTGGCGGCGTGGATTAGGCATGCAAGTCGTACGCGAAAGTTTCCTTCGGGAAATGAGTAGAGTGGCGAACTGGTGAGTACAAGGTGACTAACCTGCCCTTGAGTGGGGGATAACTTCGGGAAACCGGAGCTAATACCGCATGGCTTCTTTCCTCCTTGGAGGGACGAATAAAGCAGTGATGCGCTCAAGGATGGGGTCACCCCCCATTAGCTTGTTGGTAGGGTAATGGCCTACCAAGGCTGCGATGGGTAGCTGGACTGAGAGGTTGACCAGCCACACTGGGACTGAGATACGGCCCAG	0	0	0.0276319	0	0	0	BRC1	BRC1	BRC1	BRC1	BRC1_genera_incertae_sedis	BRC1_genera_incertae_sedis
389	GACGAACGCTGGCGGCGTGCTTAAAACATGCAAGTCGAACGGTGATGCTTGGGAGCTTGCTTCCGGGCGGATCAGTGGCGAACGGGTGAGTAACACGTGAGTAACCTGCCCTGGACTCTGGAATAACCGCGGGAAACCGTGGCTAATACCGGATACGAGACGCACAGGCATCTGTAGCGTCTGGAAAGATTTATCGGTCCAGGATGGACTCGCGGCCTATCAGCTTGTTGGTGGGGTAATGGCCTACCAAGGCGACGACGGGTAGCCGGCCTGAGAGGGTGACCGGCCACACTGGGACTGAGACACGGCCCAG	0	0	0.0276319	0	0	0	Actinobacteria	Actinobacteria	Micrococcales	Cellulomonadaceae	unclassified_Cellulomonadaceae	Cellulomonadaceae
390	GATGAACGCTAGCGGCAGGCTTAACACATGCAAGTCGAGGGGCAGCAGGTCTTCGGACGCTGGCGACCGGCAAACGGGTGCGGAACACGTACGCAACTTACCCTTATCTGGGGGATAGCCCGGTGAAAACCGGATTAACATCCCATGGTATTATAAAAAGGCATCTTTTCATAATTAAAAATTTATTGGATAAGGATGGGCGTGCGTCTGATTAGCTAGTTGGCGGGGTAACGGCCCACCAAGGCCACGATCAGTAGCTGATGTGAGAGCATGATCAGCCACACGGGCACTGAGACACGGGCCCG	0	0	0.0276319	0	0	0	Bacteroidetes	Chitinophagia	Chitinophagales	Chitinophagaceae	unclassified_Chitinophagaceae	Chitinophagaceae
391	GACGAACGCTGGCGGTATGCTTAACACATGCAAGTCGAACGAGAAGTTTTTTATTGAACCTTCGGGGGATATAAGAGACAGACAGTGGCGAACGGGTGAGTAACGCGTGGGCAACCTACCTATCGGAGCGGGATAGCCTCGAGAAATCGGGAGTAAAACCGCATAACACGGATATATCGCATGATGAATCCGTCAAAACTCCGGTGCCGATAGATGGGCCCGCGTCTGATTAGCTAGTTGGTAAGGTAAGGGCTTACCAAGGCAACGATCAGTAGCCGGTCTGAGAGGGCGAACGGCCACACTGGAACTGAGACACGGTCCAG	0	0	0.0276319	0	0	0	Firmicutes	Clostridia	Clostridiales	Eubacteriaceae	Pseudoramibacter	Pseudoramibacter
392	AACGAACGCTGGCGGCAGGCTTAACACATGCAAGTCGAACGATGTCTTCGGACATAGTGGCAGACGGGTGAGTAACGCGTGGGAATCTACCCAACTCTACGGAATAGCCTCGGGAAACTGGGATTAATACCGTATACGCCCTTCGGGGGAAAGATTTATCGGAGTTGGATGAGCCCGCGTTAGATTAGTTTGTTGGTGGGGTAATGGCCTACCAAGACTACGATCTATAGCTGGTCTGAGAGGATGATCAGCCACACTGGGACTGAGACACGGCCCAG	0	0	0.0276319	0	0	0	Proteobacteria	Alphaproteobacteria	Caulobacterales	Hyphomonadaceae	Henriciella	Henriciella
393	GACGAACGCTGGCGGCGTGCCTAAAACATGCAAGTCGAACGAGGTCCATCCGGTGGCAACACCGGGGACGACCTAGTGGCGAACGGGTGAGTAACACGTGAGGAACCTGCCCCGAAGACCGGGATAACTCGAGGAAACTCGGGCTAATACCGGATACCCCCACCAGATCGCATGGTCAGGTGAGGAAATGCATTGTGCTTCGGGAGGGCCTCGCGGCCTATCAGCTTGTTGGTGGGGTAACGGCCCACCAAGGCGTCGACGGGTAGCTGGTCTGAGAGGACGATCAGCCACACTGGGACTGAGACACGGCCCAG	0	0	0.0276319	0	0	0	Actinobacteria	Acidimicrobiia	Acidimicrobiales	Iamiaceae	Iamia	Iamia
394	GATGAACGCTGGCGGCGTGCTTAACACATGCAAGTCGAACGAAGCGGTTAAATGGATTTCTTCGGAATGAAGCTTGGCTGACTTAGTGGCGGACGGGTGAGTAACGCGTGGGTAACCTGCCTCATACAGGGGGATAACAGTTAGAAATGGCTGCTAATACCGCATATGCGCACAGTACCGCATGGTACAGGGCGGAAAGATTTATCGGTATGAGATGGACCCGCGTTGGATTAGCTAGTTGGCAGGGTAACGGCCTACCAAGGCGACGATCCATAGCCGGCCTGAGAGGGTGAACGGCCACATTGGGACTGAGACACGGCCCAA	0	0	0.0276319	0	0	0	Firmicutes	Clostridia	Clostridiales	Lachnospiraceae	unclassified_Lachnospiraceae	Lachnospiraceae
395	GATGAACGCTGGCGGCGTGCTTAACACATGCAAGTCGAACGAAGCATCTCAAACGGATTTCTTCGGATTGAAGTTTTTGATGACTTAGTGGCGGACGGGTGAGTAACGCGTGAGTAACCTGCCTTGTACAGGGGGACAACAGTTAGAAATGACTGCTAATACCGCATAAGCGCACAGAATCGCATGATTTAGTGTGAAAAGATTTATCGGTACAAGATGGATTCGCGTCTGATTAGCTAGTTGGTGAGGTAACGGCTCACCAAGGCAACGATCAGTAGCCGGCCTGAGAGGGTGAACGGCCACATTGGGACTGAGACACGGCCCAA	0	0	0.0276319	0	0	0	Firmicutes	Clostridia	Clostridiales	Lachnospiraceae	unclassified_Lachnospiraceae	Lachnospiraceae
396	GATGAACGCTGGCGGCGTGCCTAACACATGCAAGTCGAACGGGACTGATTGAAAGATCTTTTCGGAGTGATTTCTTTTAGTTTAGTGGCGGACGGGTGAGTAACGCGTGGATAACCTGCCTTTCACAGGGGGATAGCAGCTGGAAACGGCTGGTAATACCGCATACGCTCTTAAGACCGCATGATCTTAAGAGGAAAGATTTATCGGTGAGAGATGGATCCGCGTCTGATTAGCCAGTTGGCGGGGTAACGGCCCACCAAAGCTACGATCAGTAGCCGGCCTGAGAGGGCGGACGGCCACATTGGGACTGAGACACGGCCCAG	0	0	0.0276319	0	0	0	Firmicutes	Clostridia	Clostridiales	Lachnospiraceae	unclassified_Lachnospiraceae	Lachnospiraceae
397	GATGAACGCTGGCGGCGTGCCTAACACATGCAAGTCGAACGAAGCACCGGAGTTCCTCGGAACAAAGGTGACTGAGTGGCGGACGGGTGAGTAACGCGTGGGTAACCTGCCTCACACAGGGGGATAACAGCTGGAAACGGCTGCTAATACCGCATAAGCGCACAGTACCGCATGGTACAGTGTGAAAAGTTTTTCGGTGTGAGATGGACCCGCGTCTGATTAGCTAGTTGGCGGGGTAACGGCCCACCAAGGCGACGATCAGTAGCCGGCCTGAGAGGGTGGACGGCCACATTGGGACTGAGACACGGCCCAA	0	0	0.0276319	0	0	0	Firmicutes	Clostridia	Clostridiales	Lachnospiraceae	unclassified_Lachnospiraceae	Lachnospiraceae
398	GATGAACGCTGACAGAATGCTTAACACATGCAAGTCAATGGGGAAACGGTGCTTGCACCGTGATAACCATGGCGGACGGGTGAGTAACGCGTAAAGAACTTGCCTCTTAGTCTGGGATAACAGATGGAAACGACTGATAAGACTAGATATTATTAAGGTTTCGCATGAAGCTTTAATGAAAAGAGATGCTAAGAGAGAGCTTTGCGTCCTATTAGTTAGTTGGTGAGGTAACGGCTCACCAAGACGAAGATAGGTAGCCGGTCTGAGAGGATGAACGGCCACAAGGGGACTGAGATACGGCCCTT	0	0	0.0276319	0	0	0	Fusobacteria	Fusobacteriia	Fusobacteriales	Leptotrichiaceae	Leptotrichia	Leptotrichia
399	ATTGAACGCTGGCGGCAGGCTTAACACATGCAAGTCGAGCGGGGTTAAGGTACTTGTACCAAGACCTAGCGGCGGACGGGTGAGTAACACTTAGGAATCTGGCGTTTAGAGGGGGACAACATTTCGAAAGAGATGCTAATACCGCATACGTCCTACGGGAGAAAGAGGGGGACTGATTTATCAGCCTCTCGCTAAACGATGAGCCTAAGTCAGATTAGCTAGTTGGTGAGGTAAAGGCTCACCAAGGCGACGATCTGTAGCGGGTCTGAGAGGATGATCCGCCACACTGGGACTGAGACACGGCCCAG	0	0	0.0276319	0	0	0	Proteobacteria	Gammaproteobacteria	Pseudomonadales	Moraxellaceae	Acinetobacter	Acinetobacter
400	GATGAACGCTAGCGACAGGCTTAACACATGCAAGTCGAGGGGCAGCATAAAAGTAGCAATACTTTGGTGGCGACCGGCGCACGGGTGAGTAACGCGTATGCAACCTACCTATCAGAGGGGGATAACCCGGCGAAAGTCGGACTAATACCGCATAAAACAGGGGCACCGCATGGTGATATTTGTTAAAAATTTATTGCTGATAGATGGGCATGTGTTCCATTAGGTAGTTGAAGAGGTAACGGCTCACCAAGCCTACGATGGATAGGGGAACTGAGAGGTTGGTCCCCCACACTGGTACTGAGACACGGACCAG	0	0	0.0276319	0	0	0	Bacteroidetes	Bacteroidia	Bacteroidales	Porphyromonadaceae	Macellibacteroides	Macellibacteroides
401	GATGAACGCTAGCGACAGGCTTAACACATGCAAGTCGAGGGGCAACATGATTTTAGCTTGCTAAAATTGATGGCGACCGGCGCACGGGTGAGTAACGCGTATGTAACTTGCCTACCAGAGGGGGATAGCCCGGCGAAAGTCGGATTAATACCGCATAAAACAGGGGTTCCGCATGGAAATATTTGTTAAAGGATTACCGCTGGTAGATAGGCATGCGTTCCATTAGATAGTTGGTGAGGTAACGGCTCACCAAGTCGACGATGGATAGGGGTTCTGAGAGGAAGGTCCCCCACATTGGTACTGAGACACGGACCAA	0	0	0.0276319	0	0	0	Bacteroidetes	Bacteroidia	Bacteroidales	Porphyromonadaceae	Parabacteroides	Parabacteroides
402	GATGAACGCTAGCGGCAGGCTTAACACATGCAAGTCGAGGGGTAACGGGGGCGCTTGCGCCCGCCGACGACCGGCGCACGGGTGAGTAACGCGTATCCAACCTTCCCATAACTAAGGAATACCCCGTAGAAATGCGGCCTAATCCCTTATGGTCTCTTATGCCTGTCATGGGAATAAGAGTAAAGATTTATCGGTTATGGATGGGGATGCGTCTGATTAGCTTGCTGGCGGGGTAACGGCCCACCAGGGCATCGATCAGTAGGGGTTCTGAGAGGAAGGTCCCCCACATTGGAACTGAGACACGGTCCAA	0	0	0.0276319	0	0	0	Bacteroidetes	Bacteroidia	Bacteroidales	Prevotellaceae	Prevotella	Prevotella
403	GATGAACGCTAGCGGGAGGCTTAACACATGCAAGTCGAGCGGCAGCACGGACTTCGGTCTGGTGGCGAGCGGCGCACGGGTGCGTAACGCGTATGCAACCTGCCTTATACAGGGGGATAGCCCATGGAAACGTGGATTAATACCCCATAACATCATGAATTCGCATGGATTTATGATTAAAATTTCGATGGTATAAGATGGGCATGCGTCTGATTAGCTAGTTGGTGAGGTAACGGCTCACCAAGGCGACGATCAGTAGGGGTTCTGAGAGGATTATCCCCCACACTGGTACTGAGACACGGACCAG	0	0	0.0276319	0	0	0	Bacteroidetes	Bacteroidia	Bacteroidales	Prolixibacteraceae	Mariniphaga	Mariniphaga
404	GATTAACGCTGGCGGCGTGCATAACACATTCAAGTCGAACGGAGCGAAGTGCTTCGGTACTTTGCTTAGTGGCGGACGGGTGAGTAACGCGTGAGTAATCTACCTTCCAGTGCGGAATAACAACCGGAAACAGTTGCTAATACCGCATGAAATGGCAGCATCGCATGGTGCAACCATCAAAGATTTATCGCTGGAAGATGAGCTTGCGTCCGATTAGATAGTTGGCGGAGTAACAGCCCACCAAGTCGACGATCGGTAGCCGGACTGAGAGGTTGAACGGCCACATTGGAACTGAGATACGGTCCAG	0	0	0.0276319	0	0	0	Firmicutes	Clostridia	Clostridiales	Ruminococcaceae	unclassified_Ruminococcaceae	Ruminococcaceae
405	GATGAACGCTGGCGGCGTGCCTAACACATGCAAGTCGAACGAGAATCTATTAGATGATTCCTTCGGGATGAATTTGATAGAGGAAAGTGGCGGACGGGCGAGTAACGCGTGAATAACCTGCCCATAAGAGGGGGATAATCCATGGAAACGTGGACTAATACCGCATATTGAGATTTAATCGCATGATTTTATCTTGAAAGATTTATCGCTTATGGATGGATTCGCGTCTGATTAGCTAGTTGGTGAGGTAACGGCTCACCAAGGCGACGATCAGTAGCCGAACTGAGAGGTTGATCGGCCGCATTGGGACTGAGACACGGCCCAG	0	0	0.0276319	0	0	0	Firmicutes	Clostridia	Clostridiales	Ruminococcaceae	unclassified_Ruminococcaceae	Ruminococcaceae
406	GATGAATGCTGGCGGCGTGCCTAACACATGCAAGTCGTGCGACTCTTCGAGAGGAGCGGCGGACGGCTGAGTAACGCGTAGGAATCTGCCCCAAAGTGAGGGATAAGCCCGAGAAATCGGGTCTAATACCGCATAATGTCTTCGGATTAAAGCCCTTTGGGCGCTTTGGGAGGAGCCTGCGTTGGATTAGGTTGTTGGTGAGGTAATGGCTCACCAAGCCGACGATCCATAGCTGGTCTGAGAGGATGATCAGCCAGACTGGGACTGAGACACGGCCCAG	0	0	0.0276319	0	0	0	Candidatus_Saccharibacteria	Saccharibacteria_genera_incertae_sedis	Saccharibacteria_genera_incertae_sedis	Saccharibacteria_genera_incertae_sedis	Saccharibacteria_genera_incertae_sedis	Saccharibacteria_genera_incertae_sedis
407	GACGAACGCTGGCGGCGTGCCTAATACATGCAAGTGGAACGCAACTTTTCTCCCGTTTCTTCGGAAACACCTGAGAAGTTGAGTCGCGAACGGGTGAGTAACGCGTAGGTAACCTACCTCTTAGCGGGGGATAACTATTGGAAACGATAGCTAATACCGCATAACAGTGTTTAACACATGTTAAACATTTGAAAGAAGCAACTGCTTCACTAGGAGATGGACCTGCGTTGTATTAGCTAGTTGGTAGGGTAACGGCCTACCAAGGCTCCGATACATAGCCGACCTGAGAGGGTGATCGGCCACACTGGGACTGAGACACGGCCCAG	0	0	0.0276319	0	0	0	Firmicutes	Bacilli	Lactobacillales	Streptococcaceae	Streptococcus	Streptococcus
408	GATGAACGCTGGCGGCATGCCTAAGACATGCAAGTCGAACGAGACGACCTTTGGAAGACTGAGTGCTTGCACAAAGTTAGAAGAAGATCATCGTCTAGTGGCAGACGGGTGAGTAACACGTGGGTAACCTACCTTCAAGCTGGGGATAACGTTTGGAAACGAACGCTAATACCGAATAAGATATAGCAATATATTGAAAGAAGCCTTTAAAGCTTCACTTAAAGATGGGCCTGCGGCGTATTAACTAGTTGGTGAGGTAATGGCTCACCAAGGTAACGATGCGTAGCCGAACTGAGAGGTTGAACGGCCACACTGGGACTGAGACACGGCCCAG	0	0	0.0276319	0	0	0	Bacteria	unclassified_Bacteria	unclassified_Bacteria	unclassified_Bacteria	unclassified_Bacteria	Bacteria
409	GATGAACGCTGGCGGCATGCCTAATACATGCAAGTCGTGCGGAAACAGGCTCACTATCATTTGGCTACCTTCAAGTCAGGACGCGGAGATTTTCTTAGAGAAGAAAATCAGCCGCATCGTTATCGAAGGACGAATAGCAAAATGAGAGTGAGCGCTGTCGAGCGGCGGACGGGTGAGTAACACGTTAGTATCTGCCCCAAACTGAGGAATAACTCCGGGAAACCGGAGCTAATACCGCATATGGTCTTCGGATTAAAGCCTTCGGGCGGTTTGGGAGGAGCTTGCGTCTGATTAGCTAGTTGGTAAGGTAATGGCTTACCAAGGCGACGATCAGTAACTGGTCTGAGAGGATGATCAGTCACACTGGAACTGAGACACGGTCCAG	0	0	0.0276319	0	0	0	Bacteria	unclassified_Bacteria	unclassified_Bacteria	unclassified_Bacteria	unclassified_Bacteria	Bacteria
410	AACGAACGCTGGCGGCAGGCTTAATACATGCAAGTCGAACGGCAAGGATTCTTCGGAATCCCTAGAGTGGCGCACGGGTGAGTAACACGTACACAACATGCCCTATATTGGGAGATAGCATCGGGAAACTGGTGGTAATACCCCATAGTGTTGATGAGAGGCATCTCTTATTAACTAAAGATTTATTGATATAGGATTGGTGTGCGTCCCATTAGCTAGTTGGTAGGGTAACGGCCTACCAAGGCTACGATGGGTAGCTGGCGTGAGAGCGCGACCAGCCACACTGGAACTGAGACACGGTCCAG	0	0	0.0276319	0	0	0	Bacteroidetes	unclassified_Bacteroidetes	unclassified_Bacteroidetes	unclassified_Bacteroidetes	unclassified_Bacteroidetes	Bacteroidetes
411	ATTGAACGCTGGCGGCAGGCCTAACACATGCAAGTCGAGCGAGAAAGCACTTCGGTGTGAGTAGAGCGGCGGACGGGTGAGTAACGCGTGGGTATCTACCGAGTAGTGGGGGACAACAGCCGGAAACGGCTGCTAATACCGCATACGCCCTACGGGGGAAAGGGGGCAGTTTACTGCTCTCGCTATTCGATGAGCCTGCGTAAGATTAGCTAGTTGGTGTGGTAAAGGCTCACCAAGGCGACGATCTTTAGCTGGTCTGAGAGGATGATCAGCCACATCGGGACTGAGACACGGCCCGA	0	0	0.0276319	0	0	0	Proteobacteria	Gammaproteobacteria	Cellovibrionales	unclassified_Cellovibrionales	unclassified_Cellovibrionales	Cellovibrionales
412	GACGAACGCTGGCGGCGTGCCTAACACATGCAAGTCGAGCGGGGAACTGCGGAATGAAGCTTCGGCAGAATGAAACAGTTTCTAGCGGCGGACGGGTGAGTAACGCGTGAGTAACCTGCCTATCACTGGGGAATAACGCATCGAAAGGTGTGCTAATACCGCATGAGACCACAATGTCGCATGACGAAGGGGTCAAAGATTTATTGGTGATAGATGGGCTCGCGTCTGATTAGCTAGTTGGTGAGGTAACGGCCCACCAAGGCGACGATCAGTAGCCGACCTGAGAGGGTGATCGGCCACATTGGAACTGAGAAACGGTCCAA	0	0	0.0276319	0	0	0	Firmicutes	Clostridia	Clostridiales	unclassified_Clostridiales	unclassified_Clostridiales	Clostridiales
413	GACGAACGCTGGCGGCGCGCCTAACACATGCAAGTCGAGCGGGAATTTTGCGAGAGTAATCGAGTGAAAATCCAGCGGCGGACGGGTGAGTAACGCGTGAGTGACCTGCCTTACACAGGGGGATAACGTACCGAAAGGTACACTAATACCGCATGAGACCCCGGCAGCGCATGCTGCAGAGGTCAAAGGAGCAATCCGGTGTAAGATGGACTCGCGTCCGATTAGATAGTTGGTGAGGTAACGGCCCACCAAGTCAGCGATCGGTAGCCGACCTGAGAGGGTGATCGGCCACATTGGAACTGAGAGACGGTCCAA	0	0	0.0276319	0	0	0	Firmicutes	Clostridia	Clostridiales	unclassified_Clostridiales	unclassified_Clostridiales	Clostridiales
414	GACGAACGCTGGCGGTATGCTTAAGACATGCAAGTCGAGCGGGAGATGTTAGAAGCTTGCTTTTAACAAATCTAGCGGCGGACGGGTGAGTAACACGTGAGCAACCTGCCTCTTTCATCGGGATACCAATTGGAAACGATTGTTAATACCGAATATGACCACAGTACCGCATGGTACAGGGGTGAAAGGGTTTACTGGAAAGAGATGGGCTCGCGTCTGATTAGCTTGTTGGTGAGGTAACGGCCCACCAAGGCGACGATCAGTAGCCGACCTGAGAGGGTGATCGGCCACATTGGGACTGAGAACGGCCCAG	0	0	0.0276319	0	0	0	Firmicutes	Clostridia	Clostridiales	unclassified_Clostridiales	unclassified_Clostridiales	Clostridiales
415	GACGAACGCTGGCGGCGTGCCTAACACATGCAAGTCGAGCGGGGACATTGCGACGGAGACGAAGTACTCGTACGGAGTCAAAGATGTAATGTTCTAGCGGCGGACGGGTGAGTAACGCGTGAGCAACCTGTCCCTTACAGGGGGATAACACAGCGAAAGTTGTACTAATACCGCATGAGACCACAGCATCACATGGTGCAGGGGTCAAAGGAGCAATCCGGTAAGGGGTGGGCTCGCGTCCGATTAGATAGTTGGTGAGGTAACGGCCCACCAAGTCGACGATCGGTAGCCGACCTGAGAGGGTGATCGGCCACATTGGGACTGAGACACGGCCCAA	0	0	0.0276319	0	0	0	Firmicutes	Clostridia	Clostridiales	unclassified_Clostridiales	unclassified_Clostridiales	Clostridiales
416	GATGAACGCTAGCGGGAGGCTTAACACATGCAAGCCGAGGGGTAGAGATAGCTTGCTATCTTGAGACCGGCGCACGGGTGCGTAACGCGTATGCAACTTGCCCTACTGAAAGGGATAGCCTTTTGAAAAGAAGATTAATACCTTATAATAGTGATGCTGGCATCAGTAACACTTGAAAGATTTATCGCAGTAGGATAGGCATGCGTCAGATTAGCTAGTTGGTAAGGTAACGGCTTACCAAGGCGATGATCTGTAGGGGGCCTGAGAGGGTGAACCCCCACACTGGTACTGAGACACGGACCAG	0	0	0.0276319	0	0	0	Bacteroidetes	Flavobacteriia	Flavobacteriales	unclassified_Flavobacteriales	unclassified_Flavobacteriales	Flavobacteriales
417	AACGAACGTTGGCGGCGTGCCTAACACATGCAAGTCGAGCGCGAGCGGCTTCGGCCAATCGAGCGGCGCACGGGTGAGGAACACGTGAGTAATCTGCCCTAGAGTCCGGGATAACCGTCCGAAAGGAAGGCTAATACTGGATAAGCTCACGAGGCCGTAGGGTCTTGGGAGAAAAGCTCCGGCGCTCTAGGATGAGCTCGCGTCCCATTAGGTAGTTGGTGAGGTAATGGCTCACCAAGCCTACGATGGGTAACTGGTCTGAGAGGATGATCAGTCACACTGGAACTGAGACACGGTCCAG	0	0	0.0276319	0	0	0	Proteobacteria	unclassified_Proteobacteria	unclassified_Proteobacteria	unclassified_Proteobacteria	unclassified_Proteobacteria	Proteobacteria
418	GATGAACGCTAGCGGGAGGCTTAATACATGCAAGTCGAGGGGCAGCATGGGACTTCGGTTCTGATGGCGACCGGCGCACGGGTGAGTAACGCGTACACAACTTTCCTTATACTGAGGGATAACTCTGGGAAACTGGGACTAATACCTCATAGTATTATTTAAGGGCATTCTTGAATAATTAAAGGTTACGGTATAAGATGGGTGTGCGTCCTATTAGCTAGTTGGTAGTGTAATGGACTACCAAGGCGACGATAGGTAGGGGGCGTGAGAGCGTGAACCCCCACACGGGTACTGAGACACGGACCCG	0	0	0.0276319	0	0	0	Bacteroidetes	Saprospiria	Saprospirales	unclassified_Saprospirales	unclassified_Saprospirales	Saprospirales
419	ATTGAACGCTGGCGGCAGGCCTAACACATGCAAGTCGAGCGGCAGCACAGAGGAACTTGTTCCTTGGGTGGCGAGCGGCGGACGGGTGAGTAATGCCTGGGAAATTGCCCGGTAGAGGGGGATAACCATTGGAAACGATGGCTAATACCGCATAACCTCGTAAGAGCAAAGCAGGGGACCTTCGGGCCTTGCGCTACCGGATATGCCCAGGTGGGATTAGCTAGTTGGTGAGGTAAGGGCTCACCAAGGCGACGATCCCTAGCTGGTCTGAGAGGATGATCAGCCACACTGGAACTGAGACACGGTCCAG	0	0	0.0276319	0	0	0	Proteobacteria	Gammaproteobacteria	Vibrionales	Vibrionaceae	Vibrio	Vibrio_mimicus/cholerae
420	ATTGAACGCTGGCGGCAGGCTTAACACATGCAAGTCGAGCGGTAGCACAGGGGAGCTTGCTTCCTGGGTGACGAGCGGCGGACGGGTGAGTAATGTCTGGGAAACTGCCTGATGGAGGGGGATAACTACTGGAAACGGTAGCTAATACCGCATAACGTCGCAAGACCAAAGAGGGGGACCTTCGGGCCTCTTGCCATCAGATGTGCCCAGATGGGATTAGCTAGTAGGTGGGGTAATGGCTCACCTAGGCGACGATCCCTAGCTGGTCTGAGAGGATGACCAGCCACACTGGAACTGAGACACGGTCCAG	0	0	0	0	0	0.0268528	Proteobacteria	Gammaproteobacteria	Enterobacterales	Yersiniaceae	Serratia	Serratia marcescens
421	AACGAACGTTAGCGGCGCGCCTAACACATGCAAGTCGCACGAGAAAGGGCTTCGGCCCCGGTAAAGTGGCGCACGGGTGAGTAACACGTGGGTAATGTTCCCTCGGGCGGGGGATAACCTTCCGAAAGGAGGGCTAATACCGCATAAGACCACGGCCTCGAAAGGGGCTGCGGTCAAAGCAGGCCTCTTCACGAAAGCTTGCACCTGAGGATCAGCCCGCGGCCCATCAGCTAGTTGGTAGGGTAACGGCCTACCAAGGCTAAGACGGGTAGCTGGTCTGAGAGGATGATCAGCCACACTGGAACTGAGACACGGTCCAG	0	0	0	0	0	0.0179019	Proteobacteria	Deltaproteobacteria	Myxococcales	Labilitrichaceae	Labilithrix	Labilithrix
422	GATTAACGCTGGCGGCATGCCTAATACATGCAAATCGAACGAAGCCTTTTAGGCTTAGTGGTGAACGGGTGAGTAACACGTATCCAATCTACCCTTAAGTTGGGGATAACTAGTCGAAAGATTAGCTAATACCGAATAATAACATCAATATCGCATGAGAAGATGTAGAAAGTCGCTCTTTGTGGCGACGCTTTTGGATGAGGGTGCGACGTATCAGATAGTTGGTGAGGTAATGGCTCACCAAGTCAATGACGCGTAGCTGTACTGAGAGGTAGAACAGCCACAATGGGACTGAGACACGGCCCAT	0	0	0	0	0	0.0179019	Tenericutes	Mollicutes	Mycoplasmatales	Mycoplasmataceae	Ureaplasma	Ureaplasma_parvum
423	ATTGAACGCTGGCGGCATGCTTTACACATGCAAGTCGAACGGCAGCACGGGGGGCAACCCCTGGTGGCGAGTGGCGAACGGGTGAGTAATACATCGGAACGTACCCAGTAGTGGGGGATAACCTACCGAAAGGTAGGCTAATACCGCATATGCACTGAGGTGGAAAGCGGGGGACCTTCGGGCCTCGCGCTATTGGAGCGGCCGATGTCGGATTAGCTAGTTGGTGGGGTAAAGGCTCACCAAGGCGACGATCCGTAGCTGGTCTGAGAGGATGATCAGCCACACTGGGACTGAGACACGGCCCAG	0	0	0	0	0	0.0179019	Proteobacteria	Betaproteobacteria	unclassified_Betaproteobacteria	unclassified_Betaproteobacteria	unclassified_Betaproteobacteria	Betaproteobacteria
