# Supplementary material for: Vaginal and neonatal microbiota in pregnant women with preterm premature rupture of membranes and consecutive early onset neonatal sepsis
Source: BMC Med. 2023 Mar 13;21:92. doi: 10.1186/s12916-023-02805-x (PMC10009945; doi:10.1186/s12916-023-02805-x)
Supplement: Supplementary file 7 — Additional file 7: Table S7. Relative abundance data of all species level taxa across 166 vaginal swab samples. [file 12916_2023_2805_MOESM7_ESM.xlsx]

## Sheet: Supplementary Table 7
Supplementary Table 7: Relative abundance data of all species level taxa sacross 166 vaginal swab samples. The sample code indicates the time of sampling (V0, collected at the first clinical examination after confirmation of PPROM and prior antibiotic therapy; V1, sample collected after 2-6 days of antibiotic treatment; V2, sample taken within 24 h before delivery.
	H01_V0	H02_V0	H02_V1	H02_V2	H03_V0	H04_V0	H04_V2	H05_V0	H05_V2	H06_V0	H07_V0	H07_V2	H08_V0	H08_V1	H08_V2	H09_V0	H10_V0	H10_V1	H11_V0	H11_V1	H11_V2	H12_V0	H13_V0	H13_V2	H14_V0	H14_V2	H15_V0	H15_V1	H16_V0	H16_V1	H18_V0	H18_V1	H18_V2	H19_V0	H19_V1	H20_V0	H21_V0	H23_V0	H24_V0	H24_V1	H25_V0	H26_V0	IN15_V0	IN15_V2	J01_V0	J01_V1	J01_V2	J02_V0	J04_V0
Acetobacteraceae	0	0	0	0	0	0	0	0	0	0	0	0	0	0	0	0	0	0	0	0	0	0	0	0	0	0	0.00439406	0	0	0	0	0	0	0	0	0	0	0	0	0	0	0	0.0145804	0	0	0	0	0	0
Achromobacter	0	0	0	0	0	0	0	0	0	0	0	0	0	0	0	0	0	0	0	0	0	0	0	0	0	0	0	0	0	0	0	0	0	0	0	0	0	0	0	0	0	0	0.0481155	0.0142175	0	0	0	0	0
Achromobacter xylosoxidans	0	0	0	0	0	0	0	0	0	0	0	0	0	0	0	0	0	0	0	0.00529591	0.012749	0	0	0	0	0	0	0	0	0	0	0	0	0	0	0	0	0	0	0	0	0	0	0	0	0	0	0	0
Acidaminococcus intestini	0	0	0	0	0	0	0	0	0	0	0	0.00572344	0	0	0	0	0	0.0274424	0	0	0	0	0	0	0	0	0	0	0	0	0	0	0	0	0	0	0	0	0	0	0	0	0	0	0	0	0	0	0
Acidibacter	0	0	0	0	0	0	0	0	0	0	0	0	0	0	0	0	0	0	0	0	0	0	0	0	0	0	0	0	0	0	0	0	0	0	0	0	0	0	0	0	0	0	0	0	0	0	0	0	0
Acidimicrobiales	0	0	0	0	0	0	0	0	0	0	0	0	0	0	0	0	0	0	0	0	0	0	0	0	0	0	0	0	0	0	0	0	0	0	0	0	0	0	0	0	0	0	0	0	0	0	0	0	0
Acidocella	0	0	0	0	0	0	0	0	0	0	0	0	0	0	0	0	0	0	0	0	0	0	0	0	0	0	0	0	0	0	0	0	0	0	0	0	0	0	0	0	0	0	0	0	0	0	0	0	0
Acidovorax	0	0	0	0	0	0	0	0	0	0	0	0	0	0	0	0	0	0	0	0	0	0	0	0	0	0	0	0	0	0	0	0	0	0	0	0	0	0	0	0	0	0	0	0	0	0	0	0	0
Acidovorax caeni	0	0	0	0	0	0	0	0	0	0	0	0	0	0	0	0	0	0	0	0	0	0	0	0	0	0	0	0	0	0	0	0	0	0	0	0	0	0	0	0	0	0	0.0145804	0.0995227	0	0	0	0	0
Acidovorax facilis/temperans	0	0	0	0	0	0.00744048	0	0	0	0	0	0	0	0	0	0	0	0	0	0	0	0	0	0	0	0.00580203	0	0	0	0	0	0	0	0	0	0	0	0	0	0	0	0	0	0	0	0	0	0	0
Acinetobacter baumannii	0	0	0	0	0	0	0	0	0	0	0	0	0	0	0	0	0	0	0	0	0	0	0	0	0	0	0	0	0	0	0	0	0	0	0	0	0	0	0	0	0	0	0	0	0	0	0	0	0
Acinetobacter calcoaceticus/rhizosphaerae	0	0	0	0	0	0	0	0	0	0	0	0	0.0116857	0	0	0	0	0	0	0	0	0	0	0	0	0	0	0	0	0	0	0	0	0	0	0	0	0	0	0	0	0	0	0	0	0	0	0	0
Acinetobacter guillouiae	0	0	0	0	0	0	0	0	0	0	0	0	0	0	0	0	0	0	0	0	0	0	0	0	0	0.00773605	0	0	0	0	0	0	0	0	0	0	0	0	0	0	0	0	0.032077	0.0365594	0	0	0	0	0
Acinetobacter haemolyticus/johnsonii/beijerinckii	0	0	0	0	0	0	0	0	0	0	0	0	0	0	0	0	0	0	0	0	0	0	0	0	0	0	0	0	0	0	0	0	0	0	0	0	0	0	0	0	0	0	0	0	0	0	0	0	0
Acinetobacter junii	0	0	0	0	0	0	0	0	0	0	0	0	0	0.00896901	0	0	0	0.0617453	0	0	0	0	0	0	0	0.0212741	0	0	0	0.00697593	0	0	0.0106137	0	0	0	0	0	0	0	0	0	0	0	0	0	0	0	0
Acinetobacter lwoffii	0	0	0	0	0	0	0	0	0	0	0	0	0	0	0	0	0	0	0	0	0	0	0	0	0	0	0	0	0	0	0	0	0	0	0	0	0	0	0	0	0	0	0.0495735	0.0406215	0	0	0	0	0
Acinetobacter parvus	0	0	0	0	0	0	0	0	0	0	0	0	0	0	0	0	0	0	0	0	0	0	0	0	0	0	0	0	0	0	0	0	0	0	0	0	0	0	0	0	0	0	0	0	0	0	0	0	0
Acinetobacter radioresistens	0	0	0	0	0	0	0	0	0	0	0	0	0	0	0	0	0	0	0	0	0	0	0	0	0	0	0	0	0	0	0	0	0	0	0	0	0	0	0	0	0	0	0	0	0	0	0	0	0
Acinetobacter ursingii/septicus/calcoaceticus	0	0	0	0	0	0	0	0	0	0	0	0	0	0	0	0	0	0	0	0	16.9116	0	0	0	0	0	0	0	0	0	0	0	0	0	0	0	0	0	0	0	0	0	0	0	0	0	0	0	0
Actinobacteria	0	0	0	0	0	0	0	0	0	0	0	0	0	0	0	0	0	0	0	0	0	0	0	0	0	0	0	0	0	0	0	0.00655008	0	0	0	0.0151022	0	0	0	0	0	0	0	0	0	0	0	0	0
Actinobaculum massiliense	0	0	0	0	0	0	0.229784	0	0	0	0	0	0	0	0	0	0	0	0	0	0	0	0	0	0	0	0	0	0	0	0.0433463	0	2.44964	0	0	0	0	0	0	0	0	0	0	0	0	0	0	0	0
Actinomyces	0	0	0	0	0	0	0	0	0	0	0	0	0	0	0	0	0	0	0	0	0	0	0	0	0	0	0	0	0	0	0	0	0	0	0	0	0	0	0.0999177	0	0	0	0	0	0.0169523	0	0	0.0185484	0
Actinomyces orihominis/dentalis	0	0	0	0	0	0	0	0	0	0	0	0	0	0	0	0	0	0	0	0	0	0	0	0	0	0	0	0	0	0	0	0	0	0	0	0	0	0	0	0	0	0	0	0	0	0	0	0	0
Actinomyces urogenitalis	0	0	0	0	0	0	0	0	0	0	0	0	0	0	0	0	0	0	0	0	0	0	0	0	0	0	0.0571228	0	0	0	0	0	0.0594366	0	0	0	0	0	0	0	0	0	0	0	0	0	0	0	0
Actinomycetaceae	0	0	0	0	0	0	0	0	0	0	0	0	0	0	0	0	0	0	0	0	0	0	0	0	0	0	0	0	0	0	0	0	0	0	0	0	0	0	0	0	0	0	0	0	0	0	0	0	0
Actinotignum	0	0	0	0	0	0	0	0	0	0	0	0	0	0	0	0	0	0	0	0	0	0	0	0	0	0	0.147201	0	0	0	0	0	0	0	0	0	0	0	0	0	0	0	0	0	0	0	0	0	0
Actinotignum schaalii	0	0	0	0	0	0	0.368284	0	0	0	0	0.0829899	0	0	0	0	0	0	0	0	0.0191235	0	0	0	0	0	0.076896	0	0	0	0	0	0.0275956	0	0	0	0	0	0	0	0	0	0	0	0	0	0	0	0
Actinotignum urinale	0	0	0	0	0	0	0	0	0	0	0	0	0	0	0	0	0	0	0	0	0	0	0	0	0	0	0	0	0	0	0	0	0	0	0	0	0	0	0	0	0	0	0	0	0	0	0	0	0
Adlercreutzia equolifaciens	0	0	0	0	0	0	0	0	0	0	0	0	0	0	0	0	0	0	0	0	0	0	0	0	0	0	0	0	0	0	0	0	0	0	0	0	0	0	0	0	0	0	0	0	0	0	0	0	0
Aeriscardovia	0	0	0	0	0	0	0	0	0	0	0	0	0	0	0	0	0	0	0	0	0	0	0	0	0	0	0	0	0	0	0	0	0	0	0	0	0	0	0	0	0	0	0	0	0	0	0	0	0
Aerococcus christensenii	0	0.016536	0	0	0	0	0	0	0	0	0.931917	0.0600962	0	0	0	0.239989	0	0	0.472561	0	0	0	0.194682	0	0	0	0	0	0	0	0	0	0	0	0	0	0	0	0	0	0	0	2.47284	8.83112	0	0	0	0	0
Aerococcus sanguinicola	0	0	0	0	0	0	0	0	0	0	0	0	0	0	0	0	0	0	0	0	0	0	0	0	0	0	0	0	0	0	0	0	0	0	0	0	0	0	0	0	0	0	0	0	0	0	0	0	0
Aerococcus urinae	0	0	0	0	0	0	0	0	0	0	0	0	0	0	0	0	0	0	0	0	0	0	0	0	0	0	0.309781	0	0	0	0	0	0	0	0	0	0	0	0	0	0	0	0	0	0	0	0	0	0
Aerococcus viridans/urinaeequi	0	0.0264577	0	0	0	0	0	0	0	0	0	0	0	0	0	0	0	0	0	0	0	0	0	0	0	0	0	0	0	0	0	0	0	0	0	0	0	0	0	0	0	0	0	0	0	0	0	0	0
Aeromonas hydrophila/caviae	0	0	0	0	0	0	0	0	0	0	0	0	0	0	0	0	0	0	0	0	0	0	0	0	0	0	0	0	0	0	0	0	0	0	0	0	0	0	0	0	0	0	0	0	0.00753438	0	0	0	0
Aestuariispira	0	0	0	0	0	0	0	0	0	0	0	0	0	0	0	0	0	0	0	0	0	0	0	0	0	0	0	0	0	0	0	0	0	0	0	0	0	0	0	0	0	0	0	0	0	0	0	0	0
Agathobacter rectale	0	0	0	0	0	0	0	0	0	0	0	0	0	0	0	0	0	0	0	0	0.012749	0	0	0	0	0	0	0	0	0	0	0	0	0	0	0	0	0	0	0	0	0	0	0	0	0	0	0	0
Agathobaculum	0	0	0	0	0	0	0	0	0	0	0	0	0	0	0	0	0	0	0	0	0	0	0	0	0	0	0	0	0	0	0	0	0	0	0	0	0	0	0	0	0	0	0	0	0	0	0	0	0
Aggregatibacter segnis	0	0	0	0	0	0	0	0	0	0	0	0	0	0	0	0	0	0	0	0	0	0	0	0	0	0	0	0	0	0	0	0	0	0	0	0	0	0	0	0	0	0	0	0	0	0	0	0.00370968	0
Agrobacterium	0	0	0	0	0	0	0	0	0	0	0	0	0	0	0	0	0	0	0	0	0	0	0	0	0	0	0	0	0	0	0	0	0	0	0	0	0	0	0	0	0	0	0	0	0	0	0	0	0
Akkermansia muciniphila	0	0	0	0	0	0	0	0	0	0	0	0	0	0	0	0	0	0	0	0	0	0	0	0	0	0	0	0	0	0	0	0	0	0	0	0	0	0	0	0	0	0	0	0	0	0	0	0	0
Alicyclobacillus acidocaldarius	0	0	0	0	0	0	0	0	0	0	0	0	0	0	0	0	0	0	0	0	0	0	0	0	0	0.00967006	0	0	0	0	0	0	0	0	0	0	0	0	0	0	0	0	0	0	0	0	0	0	0
Alishewanella	0	0	0	0	0	0	0	0	0	0	0	0	0	0	0	0	0	0	0	0	0	0	0	0	0	0	0	0	0	0	0	0	0	0	0	0	0	0	0	0	0	0	0	0	0	0	0	0	0
Alistipes	0	0	0	0	0	0	0	0	0	0	0	0	0	0	0	0	0	0	0	0	0	0	0	0	0	0	0	0	0	0	0	0	0	0	0	0	0	0	0	0	0	0	0	0.00406215	0	0	0	0	0
Alistipes finegoldii	0	0	0	0	0	0	0	0	0	0	0	0	0	0	0	0	0	0	0	0	0	0	0	0	0	0	0	0	0	0	0	0	0	0	0	0	0	0	0	0	0	0	0	0	0	0	0	0	0
Alistipes onderdonkii	0	0	0	0	0	0	0	0	0	0	0	0	0	0	0	0	0	0	0	0	0	0	0	0	0	0	0	0	0	0	0	0	0	0	0	0	0	0	0	0	0	0	0	0	0	0	0	0	0
Alistipes putredinis	0	0	0	0	0	0	0	0	0	0	0	0	0	0	0	0	0	0	0	0	0	0	0	0	0	0	0	0	0	0	0	0	0	0	0	0	0	0	0	0	0	0	0	0	0	0	0	0	0
Alistipes shahii	0	0	0	0	0	0	0	0	0	0	0	0	0	0	0	0	0	0	0	0	0	0	0	0	0	0	0	0	0	0	0	0	0	0	0	0	0	0	0	0	0	0	0	0	0	0	0	0	0
Alkalibacterium	0	0	0	0	0	0	0	0	0	0	0	0	0	0	0	0	0	0	0	0	0	0	0	0	0	0	0	0	0	0	0	0	0	0	0	0	0	0	0	0	0	0	0	0	0	0	0	0	0
Alkalihalobacillus halodurans	0	0	0	0	0	0	0	0	0	0	0	0	0	0	0.00647403	0	0	0	0	0	0	0	0	0	0	0	0	0	0	0	0	0	0	0	0	0	0	0	0	0	0	0	0	0	0	0	0	0	0
Alloscardovia	0	0	0	0	0	0	0	0	0	0	0	0	0	0	0	0	0	0	0	0	0	0	0	0	0	0	0	0	0	0	0	0	0	0	0	0	0	0	0	0	0	0	0	0	0.00565078	0	0	0	0
Alloscardovia omnicolens	0	0	0	0	0	0	0	0	0	0	0	0	0.175285	0	0.0129481	0	0.0156605	0	0	0	0.0063745	0	0	0	0	0	0	0	0	0	0	0	0	0.0059641	0	0	0	0	0	0	0	0	0	0	9.77962	8.77658	20.5691	0	0.0890353
Alphaproteobacteria	0	0	0	0	0	0	0	0	0	0	0	0	0	0	0	0	0	0	0	0	0	0	0	0	0	0	0	0	0	0	0	0	0	0	0	0	0	0	0	0	0	0	0	0	0	0	0	0	0
Altererythrobacter	0	0	0	0	0	0	0	0	0	0	0	0	0	0	0	0	0	0	0	0	0	0	0	0	0	0	0	0	0	0	0	0	0	0	0	0	0	0	0	0	0	0	0	0	0	0	0	0	0
Anaerobutyricum	0	0	0	0	0	0	0	0	0	0	0	0	0	0	0	0	0	0.0274424	0	0	0.0063745	0	0	0	0	0	0	0	0	0	0	0	0	0	0	0	0	0	0	0	0	0	0.00874827	0.0324972	0	0	0	0	0
Anaerobutyricum hallii	0	0	0	0	0	0	0	0	0	0	0	0	0	0	0	0	0	0	0	0	0	0	0	0	0	0	0	0	0	0	0	0	0	0	0	0	0	0	0	0	0	0	0	0	0	0	0	0	0
Anaerococcus	0	0.145517	0	0.24064	0	0	0.0881362	0	0	0	0.249683	0.277587	0.0788782	0.0582986	0.00863204	0	0	2.57272	0	0.0476632	0.137052	0.00549722	0.0230545	2.08495	0	0.0444823	0.0527287	0	0	0.0627834	0.0688442	0.715596	0.199537	0	0	0	0	0	0.108734	0.0508238	0	0	0.12685	0.121865	0.0150688	0	0.00454514	0	0
Anaerococcus hydrogenalis/senegalensis	0	0.0363793	0	0	0	0	0	0	0	0	0.07385	0	0	0	0	0	0	0.198957	0	0.0158877	0	0	0	0.0230729	0	0	0.261447	0	0	0	0.0433463	0.00327504	0.031841	0	0	0	0	0	0	0.0127059	0	0	0	0	0	0	0	0	0
Anaerococcus lactolyticus	0	0	0	0	0	0	1.16781	0	0	0	0	0	0.122699	0	0	0	0	0	0	0	0	0	0	0	0	0	0	0	0	0	0	0	0	0	0	0.0215745	0	0	0.0440813	0	0	0	0.0102063	0	0	0	0	0	0
Anaerococcus murdochii	0	0.00661441	0	5.2661	0	0	0	0	0	0	0	0	0.00584283	0	0	0	0	0	0	0	0	0	0	0.0524384	0	0	0.076896	0	0	0	0	0	0.0530684	0	0	0	0	0	0	0.0211766	0	0	0	0	0	0	0	0	0
Anaerococcus obesiensis	0	0	0	0	0	0	1.11744	0	0	0	0	0.43212	0.084721	0	0	0	0	0	0.0065331	0.058255	0.0350598	0	0	0.0146827	0	0.0947666	2.67159	0.025585	0	0	0.382468	0	3.98013	0	0	0	0	0	0	0	0	0	0	0	0.0188359	0	0	0	0
Anaerococcus octavius	0	0	0	0.0279814	0	0	0	0	0	0	0.175833	0.280449	0	0	0	0	0	0.281284	0	0.0105918	0	0	0	0	0	0.0270762	0.00878812	0	0	0	0.0637446	0.00982511	0	0	0	0	0	0	0	0	0	0	0.0204126	0.054839	0.0131852	0	0	0	0
Anaerococcus prevotii	0	0	0	0	0	0	0	0	0	0	0	0	0	0	0	0	0	0	0	0	0	0	0	0	0	0	0	0	0	0	0.071394	0	0	0	0	0	0	0	0	0	0	0	0	0	0	0	0	0	0
Anaerococcus tetradius	0	0	0	0	0	0	0	0	0	0	0	0	0	0	0	0	0	0	0	0	0.0988048	0	0	0	0	0	0	0	0	0	0	0	0	0	0	0.0194171	0	0	0	0	0	0	0	0	0	0	0	0	0
Anaerococcus vaginalis	0	0	0	0	0	0	0	0	0	0	0	0	0	0	0	0	0	0	0	0	0	0	0	0	0	0	0	0	0	0	0	0	0	0	0	0	0	0	0.0146938	0	0	0	0	0	0	0	0	0	0
Anaeroglobus	0	0	0	0	0	0	0	0	0	0	0	0	0	0	0	0	0	0	0	0	0	0	0	0	0	0	0.0109851	0	0	0	0	0	0	0	0	0	0	0	0	0	0	0	0	0	0	0	0	0	0
Anaeroglobus geminatus	0	0	0	0	0	0	0	0	0	0	0	0.0200321	0.0584283	0	0	0	0	0	0	0	0	0	0	0	0	0	0	0	0	0	0	0	0.0233501	0	0	0	0	0	0	0	0	0	0	0	0	0	0	0	0
Anaerostipes	0	0	0	0	0	0	0	0	0	0	0	0	0	0	0	0	0	0	0	0	0	0	0	0	0	0	0	0	0	0	0	0	0	0	0	0	0	0	0	0	0	0	0	0	0	0	0	0	0
Anaerostipes caccae	0	0	0	0	0	0	0	0	0	0	0	0	0	0	0	0	0	0	0	0	0.0159363	0	0	0	0	0	0	0	0	0	0	0	0	0	0	0	0	0	0	0	0	0	0	0	0	0	0	0	0
Anaerostipes hadrus	0	0	0	0	0	0	0	0	0	0	0	0	0	0	0	0	0	0	0	0	0	0	0	0	0	0	0	0	0	0	0	0	0	0	0	0	0	0	0	0	0	0	0	0	0	0	0	0	0
Anoxybacillus flavithermus	0	0	0	0	0	0	0	0	0	0	0	0	0	0	0	0	0	0	0	0	0	0	0	0	0	0.0232081	0	0	0	0	0	0	0	0	0	0	0	0	0	0	0	0	0	0.0142175	0	0	0	0	0
Aquabacterium	0	0	0	0	0	0.00496032	0	0	0	0	0	0	0	0	0	0	0	0	0	0	0	0	0	0	0	0.0425483	0	0	0	0	0	0	0	0	0	0.0129447	0	0	0	0	0	0	0.00729022	0.0223418	0	0	0	0	0
Arcanobacterium	0	0.00992162	0	0	0	0	0	0	0	0	0	0	0.0116857	0	0	0	0	0	0	0	0	0	0	0	0	0	0	0	0	0	0	0	0	0	0	0	0	0	0.00881627	0	0	0	0	0	0	0	0	0	0
Asteroleplasma	0	0	0	0	0	0.00992063	0	0	0	0	0	0	0	0	0	0	0	0	0	0	0	0	0	0	0	0	0	0	0	0	0	0	0	0	0	0	0	0	0	0	0	0	0	0	0	0	0	0	0
Atopobium	0	0	0	0	0	0	0	0	0	0	0	0.0114469	0.0146071	0	0	0	0	0	0	0	0.012749	0	0	0	0	0.00773605	0	0	0	0	0	0	0	0	0	0	0	0	0	0	0	0	0	0	1.70089	0	0	0	0
Atopobium minutum	0	0	0	0	0	0	0	0	0	0	0	0	0.0964067	0	0	0	0	0	0	0.606382	0.0701195	0	0	0	0	0	0.00659109	0	0	0	0	0	0	0	0	0	0	0	0	0.0127059	0	0	0	0	2.07572	0	0.306797	0	0
Azonexus	0	0	0	0	0	0	0	0	0	0	0	0	0	0	0	0	0	0	0	0	0	0	0	0	0	0	0	0	0	0	0	0	0	0	0	0	0	0	0	0	0	0	0	0	0	0	0	0	0
Azospira oryzae	0	0	0	0	0	0	0	0	0	0	0	0	0	0	0	0	0	0	0	0	0	0	0	0	0	0	0	0	0	0	0	0	0	0	0	0	0	0	0	0	0	0	0.00583218	0.0223418	0	0	0	0	0
Bacillus circulans	0	0	0	0	0	0	0	0	0	0	0	0	0	0	0	0	0	0	0	0	0	0	0	0	0	0	0	0	0	0	0	0	0	0	0	0	0	0	0	0	0	0	0	0	0	0	0	0	0
Bacillus smithii	0	0	0	0	0	0	0	0	0	0	0	0	0	0	0	0	0	0	0	0	0	0	0	0	0	0	0	0	0	0	0	0	0	0	0	0	0	0	0	0	0	0	0	0	0	0	0	0	0
Bacillus thuringensis/cereus/weihenstephanensis	0	0	0	0	0	0	0	0	0	0	0	0	0	0	0	0	0	0	0	0	0	0	0	0	0	0	0	0	0	0	0	0	0	0	0	0	0	0	0	0	0	0	0.0481155	0.174672	0	0	0	0	0
Bacteria	0	0	0	0	0	0	0	0	0	0	0	0	0	0	0	0	0	0	0	0	0	0	0	0	0	0	0	0	0	0	0	0	0	0	0	0.0107873	0	0	0	0	0	0	0	0	0	0	0	0	0
Bacteroidaceae	0	0	0	0	0	0	0	0	0	0	0	0	0.111014	0	0	0	0	0	0	0	0	0	0	0	0	0	0	0	0	0	0	0	0	0	0	0	0	0	0	0	0	0	0	0	0	0	0	0	0
Bacteroidales	0	0	0	0	0	0	0	0	0	0	0	0	0.157756	0	0	0	0	0	0	0	0.111554	0	0	0	0	0	0	0	0	0	0.00509957	0.00818759	0	0	0	0	0	0	0	0	0	0	0	0	0	0	0	0	0
Bacteroides	0	0	0	0	0	0	0	0	0	0	0	0	0	0	0	0	0	0	0	0	0.0191235	0	0	0	0	0	0	0	0	0	0	0	0	0	0	0	0	0	0	0	0	0	0	0	0	0	0	0	0
Bacteroides acidifaciens	0	0	0	0	0	0	0	0	0	0	0	0	0	0	0	0	0	0	0	0	0	0	0	0	0	0	0	0	0	0	0	0	0	0	0	0	0	0	0	0	0	0	0.0145804	0	0	0	0	0	0
Bacteroides caccae	0	0	0	0	0	0	0	0	0	0	0	0	0	0	0	0	0	0	0	0	0	0	0	0	0	0	0	0	0	0	0	0	0	0	0	0	0	0	0	0	0	0	0	0	0	0	0	0	0
Bacteroides cellulosilyticus	0	0	0	0	0	0	0	0	0	0	0	0	0	0	0	0	0	0	0	0	0	0	0	0	0	0	0	0	0	0	0	0	0	0	0	0	0	0	0	0	0	0	0	0	0	0	0	0	0
Bacteroides clarus	0	0	0	0	0	0	0	0	0	0	0	0	0	0	0	0	0	0	0	0	0	0	0	0	0	0	0	0	0	0	0	0	0	0	0	0	0	0	0	0	0	0	0	0	0	0	0	0	0
Bacteroides eggerthii	0	0	0	0	0	0	0	0	0	0	0	0	0	0	0	0	0	0	0	0	0	0	0	0	0	0	0	0	0	0	0	0	0	0	0	0	0	0	0	0	0	0	0	0	0	0	0	0	0
Bacteroides fragilis	0	0	0	0	0	0.00992063	0	0	0	0	0	0	0	0	0	0	0	0	0	0.0105918	0.111554	0	0	0	0	0	0	0	0	0	0	0	0	0	0	0	0	0	0	0	0	0	0	0	0	0.684487	0.0340886	0	0.00890353
Bacteroides ovatus	0	0	0	0	0	0	0	0	0	0	0	0	0	0	0	0	0	0.0411636	0	0.0211836	0	0	0	0	0	0	0	0	0	0	0	0	0	0	0	0	0	0	0	0	0	0	0	0	0	0	0	0	0
Bacteroides salyersiae	0	0	0	0	0	0	0	0	0	0	0	0	0	0	0	0	0	0	0	0	0	0	0	0	0	0	0	0	0	0	0	0	0	0	0	0	0	0	0	0	0	0	0	0	0	0	0	0	0
Bacteroides stercoris	0	0	0	0	0	0	0	0	0	0	0	0	0	0	0	0	0	0	0	0	0	0	0	0	0	0	0	0	0	0	0	0.00491256	0	0	0	0	0	0	0	0	0	0	0	0	0	0	0	0	0
Bacteroides thetaiotaomicron/faecis	0	0	0	0	0	0	0	0	0	0	0	0	0	0	0	0	0	0	0	0	0	0	0	0	0	0	0	0	0	0	0	0	0	0	0	0	0	0	0	0	0	0	0	0	0	0	0	0	0
Bacteroides uniformis	0	0	0	0	0	0	0	0	0	0	0	0	0	0	0	0	0	0.0548847	0	0	0	0	0	0	0	0	0	0	0	0	0	0	0	0	0	0	0	0	0	0	0	0	0	0	0.00565078	0	0	0	0
Bacteroides xylanisolvens	0	0	0	0	0	0	0	0	0	0	0	0	0	0	0	0	0	0	0	0	0	0	0	0	0	0	0	0	0	0	0	0	0	0	0	0	0	0	0	0	0	0	0	0	0	0	0	0	0
Barnesiella	0	0	0	0	0	0	0	0	0	0	0	0	0	0	0	0	0	0	0	0	0	0	0	0	0	0	0	0	0	0	0	0	0	0	0	0	0	0	0	0	0	0	0	0	0	0	0	0	0
Barnesiella intestinihominis	0	0	0	0	0	0	0	0	0	0	0	0	0	0	0	0	0	0	0	0	0	0	0	0	0	0	0	0	0	0	0	0	0	0	0	0	0	0	0	0	0	0	0	0	0	0	0	0	0
Belliella	0	0	0	0	0	0	0	0	0	0	0	0	0	0	0	0	0	0	0	0	0	0	0	0	0	0	0	0	0	0	0	0	0	0	0	0	0	0	0	0	0	0	0	0	0	0	0	0	0
Betaproteobacteria	0	0	0	0	0	0	0	0	0	0	0	0.0171703	0	0	0	0	0	0.0754665	0	0	0	0	0	0	0	0	0	0	0	0	0	0	0	0	0	0.0043149	0	0	0	0	0	0	0	0.0101554	0	0	0	0	0
Bifidobacterium	0	0	0	0	0	0	0	0	0	0	0	0	0	0	0	0	0	0	0	0	0	0	0	0	0	0	0	0	0	0	0	0	0	0	0	0	0	0	0	0	0	0	0	0	0	0	0	0	0
Bifidobacterium adolescentis ATCC15703	0	0	0	0	0	0	0	0	0	0	0	0	0	0	0	0	0	0	0	0.00794386	0	0	0	0	0	0	0	0	0	0	0	0	0	0	0	0	0	0	0	0	0	0	0	0	0	0	0	0	0
Bifidobacterium adolescentis Eg1	0	0	0	0	0	0	0	0	0	0	0	0	0	0	0	0	0	0	0	0	0	0	0	0	0	0	0	0	0	0	0	0	0	0	0	0	0	0	0	0	0	0	0	0	0	0	0	0	0
Bifidobacterium animalis	0	0	0	0	0	0	0	0	0	0	0	0	0	0	0	0	0	0	0	0	0	0	0	0	0	0	0	0	0	0	0	0	0	0	0.0378567	0	0	0	0	0	0	0	0	0	0	0	0	0.0389516	0
Bifidobacterium bifidum	0	0	0	0	0	0	0	0	0	0	0.0281334	0.0744048	0	0	0	0	0	0	0.0783972	0	0	0	0	0	0	0	0.206521	0	0	0	0	0	0	0	0	0	0	0	0	0	0	0	0	0	0	0	0	0.00370968	0
Bifidobacterium boum	0	0	0	0	0	0	0	0	0	0	0	0	0	0	0	0	0	0	0	0	0	0	0	0	0	0	0	0	0	0	0	0	0	0	0	0	0	0	0	0	0	0	0	0	0	0	0	0	0
Bifidobacterium breve	0	0	0	0	0	0	0.0157386	0	0	0	0	0	1.11598	0	0.192063	0	0	0	0	0	0	0	0	0	0	0	0	0	0	0	0	0	0	0	0	0	0	0	0	0	0	0	0	0	0	0	0	0	0
Bifidobacterium catenulatum	0	0	0	0	0	0	0	0	0	0	0	0	0	0	0	0	0	0	0	0	0	0	0	0	0	0	0	0	0	0	0	0	0	0	0	0	0	0	0	0	0	0	0	0	0	0	0	0	0
Bifidobacterium dentium	0	0	0	0	0	0	0	0	0	0	0.05275	1.35646	0	0	0	0	0	0	0	0	0	0.00366482	0	0	0	0	0	0	0	0	0	0	0	0	0	0	0	0	0	0	0	0	0	0	0	0	0	0	0
Bifidobacterium faecale/adolescentis LCR4	0	0	0	0	0	0	0	0	0	0	0	0	0	0	0	0	0	0	0	0	0	0	0	0	0	0	0	0	0	0	0	0	0	0	0	0	0	0	0	0	0	0	0	0	0	0	0	0	0
Bifidobacterium longum	0	0	0	0	0	0	0	0	0	0	0.0351667	0.171703	0	0	0	0	0	0.0411636	0	0	4.29004	0	0	0	0.00661259	0.0270762	12.9339	0.00930362	0	0.198814	0	0.00327504	0	0.0059641	0.136867	0	0	0	0	0	0	0	2.52533	0	0	0.0216439	0	0	0
Bifidobacterium pseudocatenulatum	0	0	0	0	0	0	0	0	0	0	0	0	0	0	0	0	0	0	0	0	0	0	0	0	0	0	0	0	0	0	0	0	0	0	0	0	0	0	0	0	0	0	0	0	0	0	0	0	0
Bifidobacterium pseudolongum	0	0	0	0	0	0	0	0	0	0	0	0	0	0	0	0	0	0	0	0	0	0	0	0	0	0	0	0	0	0	0	0	0	0	0	0	0	0	0	0	0	0	0	0	0	0	0	0	0
Bifidobacterium pullorum/gallinarum/seculare	0	0	0	0	0	0	0	0	0	0	0	0	0	0	0	0	0	0	0	0	0	0	0	0	0	0	0	0	0	0	0	0	0	0	0	0	0	0	0	0	0	0	0	0	0	0	0	0	0
Bifidobacterium scardovii	0	0	0	0	0	0	0	0	0	0	0	0.180288	0	0	0	0	0	0	0	0	0	0	0	0	0	0	0	0	0	0	0	0	0	0	0	0	0	0	0	0	0	0	0	0	0.0433227	0.205617	0	0	0
Bilophila	0	0	0	0	0	0	0	0	0	0	0	0	0	0	0	0	0	0	0	0	0	0	0	0	0	0	0	0	0	0	0	0	0	0	0	0	0	0	0	0	0	0	0	0	0	0	0	0	0
Bilophila wadsworthia	0	0	0	0	0	0	0	0	0	0	0	0	0	0	0	0	0	0.0480241	0	0	0	0	0	0	0	0	0	0	0	0	0	0	0	0	0	0	0	0	0	0	0	0	0	0	0	0	0	0	0
Blastococcus	0	0	0	0	0	0	0	0	0	0	0	0	0	0	0	0	0	0	0	0	0	0	0	0	0	0.0116041	0	0	0	0	0	0	0	0	0	0	0	0	0	0	0	0	0.166217	0	0	0	0	0	0
Blautia	0	0	0	0	0	0	0	0	0	0	0	0	0	0	0	0	0	0.0686059	0	0	0	0	0	0	0	0	0	0.0186072	0	0	0	0	0	0	0	0.0043149	0	0	0	0.0211766	0	0	0.00583218	0	0	0	0	0	0
Blautia hansenii	0	0	0	0	0	0	0	0	0	0	0	0	0	0	0	0	0	0	0	0	0	0	0	0	0	0	0	0	0	0	0	0	0	0	0	0	0	0	0	0	0	0	0	0	0	0	0	0	0
Blautia hydrogenotrophica	0	0	0	0	0	0	0	0	0	0	0	0	0	0	0	0	0	0	0	0	0	0	0	0	0	0	0	0	0	0	0	0	0	0	0	0	0	0	0	0.0465885	0	0	0	0	0	0	0	0	0
Blautia obeum	0	0	0	0	0	0	0	0	0	0	0	0	0	0	0	0	0	0.034303	0	0	0	0	0	0	0	0	0	0	0	0	0	0	0	0	0	0	0	0	0	0	0	0	0	0	0	0	0	0	0
Brachybacterium	0	0	0	0	0	0	0	0	0	0	0	0	0	0	0	0	0	0	0	0	0	0	0	0	0	0	0	0	0	0	0	0	0	0	0	0	0	0	0	0	0	0	0.0422833	0	0	0	0	0	0
Brachybacterium conglomeratum/paraconglomeratum	0	0	0	0	0	0	0	0	0	0	0	0	0	0	0	0	0	0	0	0	0	0	0	0	0	0	0	0	0	0	0	0	0	0	0	0	0	0	0	0	0	0	0	0	0	0	0	0	0
Brachybacterium muris	0	0	0	0	0	0	0	0	0	0	0	0	0	0	0	0	0	0	0	0	0	0	0	0	0	0	0	0	0	0	0	0	0	0	0	0	0	0	0	0	0	0	0	0	0	0	0	0	0
Bradyrhizobiaceae	0	0	0	0	0	0	0	0	0	0	0	0	0	0	0.00647403	0	0	0	0	0	0	0	0	0	0	0	0	0	0	0	0	0	0	0	0.00582411	0	0	0	0	0	0	0	0	0	0	0	0	0	0
Bradyrhizobium	0	0	0	0	0	0	0	0	0	0	0	0	0	0	0	0	0	0	0	0	0	0	0	0	0	0	0	0	0	0	0	0	0	0	0	0	0	0	0	0	0	0	0	0	0	0	0	0	0
Brevibacterium	0	0	0	0	0	0	0	0	0	0	0	0	0	0	0	0	0	0	0	0	0	0	0	0	0	0	0	0	0	0	0	0	0	0	0	0	0	0	0	0.0211766	0	0	0	0	0	0	0	0	0
Brevibacterium epidermidis	0	0	0	0	0	0	0	0	0	0	0	0	0	0	0	0	0	0	0	0	0	0	0	0	0	0	0	0	0	0	0	0	0	0	0	0	0	0	0	0	0	0	0	0	0	0	0	0	0
Brevibacterium luteolum	0	0	0	0	0	0	0	0	0	0	0	0	0	0	0	0	0	0	0	0	0	0	0	0	0	0	0	0	0	0	0	0	0	0	0	0	0	0	0	0	0	0	0	0	0	0	0	0	0
Brevibacterium massiliense	0	0	0	0	0	0	0	0	0	0	0	0	0	0	0	0	0	0	0	0	0	0	0	0	0	0.0328782	0	0	0	0	0	0	0	0	0	0	0	0	0	0	0	0	0.0102063	0.0365594	0	0	0	0	0
Brevibacterium paucivorans	0	0	0	0	0	0	0	0	0	0	0	0	0	0	0	0	0	0	0	0	0	0	0	0	0	0	0	0	0	0	0	0.00818759	0	0	0	0	0	0	0	0	0	0	0	0	0	0	0	0	0
Brevibacterium sanguinis casei	0	0	0	0	0	0	0	0	0	0	0	0	0	0	0	0	0	0	0	0	0	0	0	0	0	0.00580203	0	0	0	0	0	0	0	0	0	0	0	0	0	0	0	0	0	0	0	0	0	0	0
Brevundimonas	0	0	0	0	0	0	0	0	0	0	0	0	0	0	0	0	0	0	0	0	0	0	0	0	0	0	0	0	0	0	0	0	0	0	0	0	0	0	0	0	0	0	0.271196	0	0	0	0	0	0
Brevundimonas bullate terrae	0	0	0	0	0	0	0	0	0	0	0.00703334	0	0	0	0	0	0	0	0	0	0	0	0	0	0	0	0	0	0	0	0	0	0	0	0	0	0	0	0	0	0	0	0.0524896	0	0	0	0	0	0
Brevundimonas diminuta	0	0	0	0	0	0	0	0	0	0	0	0	0	0	0	0	0	0	0	0	0	0	0	0	0	0	0	0	0	0	0	0	0	0	0	0	0	0	0	0	0	0	0	0.0589012	0	0	0	0	0
Brevundimonas vesicularis/intermedia/mediterranea	0	0	0	0	0	0	0	0	0	0	0	0	0	0	0	0	0	0	0	0.0132398	0	0	0	0	0	0.00967006	0	0	0	0	0	0	0	0	0	0	0	0	0	0	0	0	0.914194	0	0	0	0	0	0
Brucella intermedia/melitensis	0	0	0	0	0	0	0	0	0	0	0	0	0	0	0	0	0	0	0	0	0	0	0	0	0	0	0	0	0	0	0	0	0	0	0	0	0	0	0	0	0	0	0.0174965	0.0893673	0	0	0	0	0
Bulleidia	0	0	0	0	0	0	0	0	0	0	0	0	0	0	0	0	0	0	0	0	0	0	0	0	0	0	0	0	0	0	0	0	0	0	0	0	0	0	0	0.0169413	0	0	0	0	0	0	0	0	0
Burkholderiales	0	0	0	0	0	0	0	0	0	0	0	0	0	0	0	0	0	0.0274424	0	0	0	0	0	0	0	0	0	0	0	0	0	0	0	0	0	0	0	0	0	0	0	0	0.0466574	0	0	0	0	0	0
Butyricicoccus	0	0	0	0	0	0	0	0	0	0	0	0	0	0	0	0	0	0	0	0	0	0	0	0	0	0	0	0	0	0	0	0	0	0	0	0	0	0	0	0	0	0	0	0	0	0	0	0	0
Butyricimonas paravirosa	0	0	0	0	0	0	0	0	0	0	0	0	0	0	0	0	0	0	0	0	0	0	0	0	0	0	0	0	0	0	0	0	0	0	0	0	0	0	0	0	0	0	0	0	0	0	0	0	0
Butyricimonas virosa	0	0	0	0	0	0	0	0	0	0	0	0	0	0	0	0	0	0	0	0	0	0	0	0	0	0	0	0	0	0	0	0	0	0	0	0	0	0	0	0	0	0	0	0	0	0	0	0	0
Camelimonas	0	0	0	0	0	0	0	0	0	0	0	0	0	0	0	0	0	0	0	0	0	0	0	0	0	0	0	0	0	0	0	0	0	0	0	0	0	0	0	0	0	0	0.00729022	0.0365594	0	0	0	0	0
Campylobacter	0	0	0	0	0	0	0	0	0	0	0	0	0	0	0	0	0	0	0	0	0	0	0	0	0	0	0	0	0	0	0	0	0	0	0	0	0	0	0	0	0	0	0	0	0	0	0	0	0.0200329
Campylobacter concisus	0	0	0	0	0	0	0	0	0	0	0	0	0	0	0	0	0	0	0	0	0	0	0	0	0	0	0	0	0	0	0	0	0	0	0	0	0	0	0	0	0	0	0	0	0	0	0	0	0
Campylobacter gracilis	0	0	0	0	0	0	0	0	0	0	0	0	0	0	0	0	0	0	0	0	0	0	0	0	0	0	0	0	0	0.0156958	0	0	0	0	0	0	0	0	0.0617139	0	0	0	0	0	0	0	0	0	0
Campylobacter hominis	0	0	0	0	0	0	0.0188863	0	0	0	0	0	0.0905638	0	0	0	0	0	0	0	0	0	0	0	0	0	0	0	0	0	0.0407966	0	0	0	0	0	0	0	0	0	0	0	0	0	0	0	0	0	0
Campylobacter showae	0	0	0	0	0	0	0	0	0	0	0	0	0	0	0	0	0	0	0	0	0	0	0	0	0	0	0	0	0	0	0	0	0	0	0	0	0	0	0	0	0	0	0	0	0	0.00811644	0	0	0
Campylobacter ureolyticus	0	0	0	0	0	0	0.406056	0	0	0	0.101983	0.0658196	0.239556	0	0	0	0	0	0	0	0	0.00549722	0	0	0.0154294	0	0.553651	0	0	0	0.0433463	0.00818759	0	0	0.0145603	0.0280469	0	0	0.0293876	0	0.0225673	0	0	0	0.00941797	0	0	0	0
Capnocytophaga	0	0	0	0	0	0.014881	0	0	0	0	0	0	0	0	0	0	0	0	0	0	0	0	0	0	0	0	0	0	0	0	0	0	0	0	0	0	0	0	0	0	0.0090269	0	0	0	0	0	0	0	0
Capnocytophaga sputigena	0	0	0	0	0	0	0	0	0	0	0	0	0	0	0	0	0	0	0	0	0	0	0	0	0	0	0	0	0	0	0	0	0	0	0	0	0	0	0	0	0	0	0	0	0	0	0	0	0
Carnobacterium	0	0	0	0	0	0	0	0	0	0	0	0	0	0	0	0	0	0	0	0	0	0	0	0	0	0	0	0	0	0	0	0.00491256	0	0	0	0	0	0	0	0	0	0	0	0	0	0	0	0	0
Catenibacterium	0	0	0	0	0	0	0	0	0	0	0	0	0	0	0	0	0	0	0	0	0	0	0	0	0	0	0	0	0	0	0	0	0	0	0	0	0	0	0	0	0	0	0	0	0	0	0	0	0
Catenibacterium mitsuokai	0	0	0	0	0	0	0	0	0	0	0	0	0	0	0	0	0	0	0	0	0	0	0	0	0	0	0	0	0	0	0	0	0	0	0	0	0	0	0	0	0	0	0	0	0	0	0	0	0
Catonella morbi	0	0	0	0	0	0	0	0	0	0	0	0	0	0	0	0	0	0	0	0	0	0	0	0	0	0	0	0	0	0	0	0	0	0	0	0	0	0	0	0	0	0	0	0	0	0	0	0	0
Caulobacteraceae	0	0	0	0	0	0	0	0	0	0	0	0	0.0233713	0	0	0	0	0	0	0	0	0	0	0	0	0	0	0	0	0	0	0	0	0	0	0	0	0	0	0	0	0	0	0	0	0	0	0	0
Chryseobacterium	0	0	0	0	0	0	0	0	0	0	0	0	0	0	0	0	0	0	0	0	0	0	0	0	0	0	0	0	0	0	0	0	0	0	0	0	0	0	0	0	0	0	0.0408253	0.054839	0	0	0	0	0
Citrobacter	0	0	0	0	0	0	0	0	0	0	0	0	0	0	0	0	0	0	0	0	0	0	0	0	0	0	0	0	0	0	0	0	0	0	0	0	0	0	0	0	0	0	0	0.0568701	0	0	0.0727223	0	0
Citrobacter farmeri/amalonaticus	0	0	0	0	0	0	0	0	0	0	0	0	0	0	0	0	0	0	0	0	0	0	0	0	0	0	0	0	0	0	0	0	0	0	0	0	0	0	0	0	0	0	0	0	0	0	0	0	0
Citrobacter koseri/Salmonella	0	0.0363793	0	0	0	0	0	0	0	0	0	0	0	0	0	0	0	0	0	0	0	0	0	0	0	0	0	0	0	0	0	0	0	0	0	0	0	0	0	0	0	0	0	0	0.126201	0	0	0	0
Cloacibacterium	0	0	0	0	0	0	0	0	0	0	0	0	0.0146071	0.00896901	0	0	0	0	0	0	0	0	0	0	0	0	0	0	0	0	0	0	0	0	0	0	0	0	0	0	0	0	0	0	0	0	0	0	0
Cloacibacterium normanense	0	0	0	0	0	0	0	0	0	0	0	0	0	0	0	0	0	0	0	0	0	0	0	0	0	0	0	0	0	0	0	0	0	0	0	0	0	0	0	0	0	0	0	0	0	0	0	0	0
Cloacibacterium rupense	0	0	0	0	0	0	0	0	0	0	0	0	0	0	0	0	0	0	0	0	0	0	0	0	0	0.0502843	0	0	0	0	0	0	0	0	0	0	0	0	0	0	0	0	0.0204126	0.0731187	0	0	0	0	0
Clostridiales	0	0	0	0	0	0	0	0	0	0	0	0.00858516	0.426526	0	0	0	0	0	0	0.0211836	0.0446215	0	0	0	0	0.0116041	0	0	0	0	0	0	0.00849095	0	0	0.0172596	0	0	0	0	0	0	0	0	0	0	0	0	0
Clostridiales Incertae Sedis XIII	0	0	0	0	0	0	0	0	0	0	0	0	0.175285	0	0	0	0	0	0	0	0.0573705	0	0	0	0	0	0	0	0	0	0	0	0.0106137	0	0	0	0	0	0	0	0	0	0	0	0	0	0	0	0
Clostridium IV	0	0	0	0	0	0	0	0	0	0	0	0	0	0	0	0	0	0	0	0	0	0	0	0	0	0	0	0	0	0	0	0	0	0	0	0	0	0	0	0	0	0	0	0	0	0	0	0	0
Clostridium IV Eubacterium siraeum	0	0	0	0	0	0	0	0	0	0	0	0	0	0	0	0	0	0	0	0	0	0	0	0	0	0	0	0	0	0	0	0	0	0	0	0	0	0	0	0	0	0	0	0	0	0	0	0	0
Clostridium sensu stricto	0	0	0	0	0	0	0	0	0	0.120715	0	0	0	0	0	0	0	0	0	0	0.012749	0	0	0	0	0	0	0.00697772	0	0	0	0	0	0	0	0	0.681512	0	0	0	0	0	0	0	0	0	0	0	0
Clostridium sensu stricto C. colicanis	0	0	0	0	0	0	0	0	0	0	0	0	0	0	0	0	0	0	0	0	0	0	0	0	0	0	0	0	0	0	0	0	0	0.0656051	0	0	0	0	0	0	0	0	0	0	0	0	0	0	0
Clostridium sensu stricto C. perfringens	0	0	0	0	0	0	0	0	0	0	0	0	0	0	0	0	0	0	0	0	0.0191235	0	0	0	0	0	0	0	0	0	0	0	0	0	0	0	0	0	0	0	0	0	0	0	0	0	0	0	0
Clostridium XIVa	0	0	0	0	0	0	0	0	0	0	0	0	0	0	0	0	0	0.0480241	0	0	0	0	0	0	0	0	0	0	0	0	0	0	0	0	0	0	0	0	0	0	0	0	0	0	0	0	0	0	0
Clostridium XIVa C. symbiosum	0	0	0	0	0	0	0	0	0	0	0	0	0	0	0	0	0	0	0	0	0	0	0	0	0	0	0	0	0	0	0	0	0	0	0	0	0	0	0	0	0	0	0	0	0	0	0	0	0
Clostridium XlVa C. leptum hylemonae	0	0	0	0	0	0	0	0	0	0	0	0	0	0	0	0	0	0	0	0	0.0159363	0	0	0	0	0	0	0	0	0	0	0	0	0	0	0	0	0	0	0	0	0	0	0	0	0	0	0	0
Clostridium XlVa C. scindens	0	0	0	0	0	0	0	0	0	0	0	0	0	0	0	0	0	0	0	0	0	0	0	0	0	0	0	0	0	0	0	0	0	0	0	0	0	0	0	0	0	0	0	0	0	0	0	0	0
Clostridium XVIII C. spiroforme	0	0	0	0	0	0	0	0	0	0	0	0	0	0	0	0	0	0	0	0	0	0	0	0	0	0	0	0	0	0	0	0	0	0	0	0	0	0	0	0	0	0	0	0	0	0	0	0	0
Cobetia	0	0	0	0	0	0	0	0	0	0	0	0	0	0	0	0	0	0	0	0	0	0	0	0	0	0	0	0	0	0	0	0	0	0	0	0	0	0	0	0	0	0	0	0	0	0	0	0	0
Collinsella	0	0	0	0	0	0	0	0	0	0	0	0	0	0	0	0	0	0.0754665	0	0	0	0	0	0	0	0	0	0	0	0	0	0	0	0	0	0	0	0	0	0	0	0	0	0	0	0	0	0	0
Collinsella aerofaciens	0	0	0	0	0	0	0	0	0	0	0	0	0	0	0	0	0	0	0	0	0	0	0	0	0	0	0	0	0	0	0	0	0	0	0	0	0	0	0	0	0	0	0.032077	0	0	0	0	0	0
Comamonadaceae	0	0	0	0	0	0	0	0	0	0	0	0	0	0	0	0	0	0	0	0	0	0	0	0	0	0	0	0	0	0	0	0	0	0	0	0	0	0	0	0	0	0	0	0.0203108	0	0	0	0	0
Comamonas aquatica/jiangduensis	0	0	0	0	0	0	0	0	0	0	0	0	0	0	0	0	0	0	0	0	0	0	0	0	0	0	0	0	0	0	0	0	0	0	0	0	0	0	0	0	0	0	0	0	0	0	0	0	0
Comamonas testosteroni	0	0	0	0	0	0	0	0	0	0	0	0	0	0	0	0	0	0.0274424	0	0	0	0	0	0	0	0	0	0	0	0	0	0	0	0	0	0	0	0	0	0	0	0	0	0	0	0	0	0	0
Coprobacter	0	0	0	0	0	0	0	0	0	0	0	0	0	0	0	0	0	0	0	0	0	0	0	0	0	0	0	0	0	0	0	0	0	0	0	0	0	0	0	0	0	0	0	0	0	0	0	0	0
Coprobacter fastidiosus	0	0	0	0	0	0	0	0	0	0	0	0	0	0	0	0	0	0	0	0	0	0	0	0	0	0	0	0	0	0	0	0	0	0	0	0	0	0	0	0	0	0	0	0	0	0	0	0	0
Coprococcus	0	0	0	0	0	0	0	0	0	0	0	0	0	0	0	0	0	0	0	0	0	0	0	0	0	0	0	0	0	0	0	0	0	0	0	0	0	0	0.00587751	0.00847063	0	0	0	0	0	0	0	0	0
Coriobacteriia	0	0	0	0	0	0	0	0	0	0	0	0	0	0	0	0	0	0	0	0	0	0	0	0	0	0	0.0263644	0.00930362	0	0	0	0	0	0	0	0	0	0	0	0	0	0	0	0	0.0979469	0	0	0	0
Corynebacterium	0	0.472931	0	0	0	0	0.0409204	0	0.0414213	0	0	0	0	0.121082	0.0280541	0	0	0.0617453	0	0.0317755	0	0	0	0	0	0	0	0	0	0.0383676	0	0	0	0	0	0	0	0	0	0.0211766	0	0	0.27557	0.274195	0	0	0	0	0
Corynebacterium accolens/segmentosum fastidiosum	0	0	0	0	0	0	0	0	0	0	0	0	0	0	0	0	0	5.46103	0	0.0794386	0	0	0	0	0	0	0	0	0	0	0	0	0	0	0	0	0	0	0	0	0	0	0	0	0.050857	0	0	0	0
Corynebacterium afermentans CIP103500	0	0	0	0	0	0	0	0	0	0	0	0.271864	0.0146071	0	0	0	0	0	0	0	0	0	0	0	0	0	0	0	0	0	0	0	0	0	0	0	0	0	0	0	0	0	0	0	0	0	0	0	0
Corynebacterium amycolatum	0	0	0	0	0	0	0	0	0.109471	0	0.03165	0.00858516	0	0.0403606	0	0	0	0.500823	0.0631533	7.0515	0.19761	0.00732963	0.153696	10.8296	0	0	0	0	0	0.0837112	0.0866927	0.0196502	2.10575	0	0	0.0107873	0	0	0.146938	0.144001	0	0	0.0233287	0.0649944	0	0	0	0	0
Corynebacterium atypicum	0	0	0	0	0	0	0	0	0	0	0	0	0	0	0	0	0	0	0	0	0	0	0	0	0	0	0	0	0	0	0	0	0	0	0	0	0	0	0	0	0	0	0	0	0	0	0	0	0
Corynebacterium aurimucosum	0	0	0	0	0	0	0	0	0	0	0	0	0	0	0	0	0	0	0	0	0	0	0	0	0	0	0	0	0	0	0	0	0	0	0	0	0	0	0	0	0	0	0	0	0	0	0	0	0
Corynebacterium aurimucosum/minutissimum	0	0	0	0	0	0	0	0	0	0	0	0	0	0	0	0	0	0	0	0.156229	0	0	0	0	0	0	0	0	0	0.0366236	0	0	0.0212274	0	0	0	0	0	0.011755	0	0	0	0	0.0142175	0	0	0	0	0
Corynebacterium casei	0	0	0	0	0	0	0	0	0	0	0	0	0	0	0	0	0	0	0	0	0	0	0	0	0	0	0	0	0	0	0	0	0	0	0	0	0	0	0	0	0	0	0	0	0	0	0	0	0
Corynebacterium coyleae	0	0	0	0	0	0	0	0	0	0	0	0	0	0	0	0	0	0	0	0	0	0	0	0	0	0	0	0	0	0	0.0254978	0	0.507334	0	0	0	0	0	0	0	0	0	0	0	0	0	0	0	0
Corynebacterium durum	0	0	0	0	0	0	0	0	0	0	0	0	0	0	0	0	0	0	0	0	0	0	0	0	0	0	0	0	0	0	0	0	0	0	0	0	0	0	0	0	0	0	0	0	0	0	0	0	0
Corynebacterium frankenforstense	0	0	0	0	0	0	0	0	0	0	0	0	0	0	0	0	0	0	0	0	0	0	0	0	0	0	0	0	0	0	0	0	0	0	0	0	0	0	0	0	0	0	0	0	0	0	0	0	0
Corynebacterium freneyi	0	0	0	0	0	0	0	0	0	0	0	0	0	0	0	0	0	0	0	0	0	0	0	0	0	0	0	0	0	0	0	0	0	0	0	0	0	0	0	0	0	0	0	0	0	0	0	0	0
Corynebacterium genitalium ATCC33032	0	0	0	0	0	0	0	0	0.0828427	0	0	1.43658	0	0	0	0	0	0.205818	0	0	0	0.00916204	0	0	0	0.0754264	0	0.00697772	0	0	0.0178485	0	0	0	0	0	0	0	0	0.0169413	0	0	0	0.0751498	0	0	0	0	0
Corynebacterium glucuronolyticum	0	1.75282	0	0	0	0	0	0	0	0	0	0	0	0	0	0	0	0	0	0	0	0	0	0	0	0	0	0	0	0	0	0	0	0	0	0	0	0	0	0	0	0	0	0	0	0	0	0	0
Corynebacterium imitans	0	0	0	0	0	0	0	0	0	0	0	0	0	0	0	0	0	0	0	0	0	0	0	0	0	0	0	0	0	0	0	0	0	0	0	0	0	0	0	0	0	0	0	0	0	0	0	0	0
Corynebacterium jeikeium	0	0	0	0	0	0	0	0	0	0	0	0	0	0	0	0	0	0.212678	0	0	0	0	0	0	0	0	0	0	0	0	0.0203983	0	0	0	0	0	0	0	0	0	0	0	0	0	0	0	0	0	0
Corynebacterium jeikeium cluster	0	0	0	0	0	0	0	0	0	0	0	0	0	0	0	0	0	0.219539	0	0.43956	0	0	0	0	0	0	0	0.137228	0	0	0	0.0212877	0.0679276	0.0059641	0	0	0	0	0	0	0	0	0	0	0	0	0	0	0
Corynebacterium kroppenstedtii	0	0	0	0	0	0	0	0	0	0	0	0	0	0	0	0	0	1.02223	0	0.0211836	0	0	0	0	0	0	0	0	0	0	0	0	0	0	0	0	0	0	0	0	0	0	0	0	0	0	0	0	0
Corynebacterium macginleyi	0	0	0	0	0	0	0	0	0	0	0	0	0	0	0	0	0	6.17453	0	0.150933	0	0	0	0	0	0	0	0	0	0	0	0	0	0	0	0	0	0	0	0	0	0	0	0	0	0	0	0.0129839	0
Corynebacterium massiliense	0	0	0	0	0	0	0	0	0	0	0	0	0	0	0	0	0	0	0	0	0	0	0	0	0	0	0	0	0	0	0	0	0	0	0	0	0	0	0	0.0847063	0	0	0	0	0	0	0	0	0
Corynebacterium mastitidis	0	0	0	0	0	0	0	0	0	0	0	0	0	0	0	0	0	0	0	0	0	0	0	0	0	0	0	0	0	0	0	0	0	0	0	0	0	0	0	0	0	0	0	0	0.0226031	0	0	0	0
Corynebacterium minutissimum	0	0	0	0	0	0	0	0	0	0	0	0	0	0	0	0	0	0	0	0.0291275	0	0	0	0	0	0	0	0	0	0	0	0	0	0	0	0	0	0	0	0	0	0	0	0	0	0	0	0	0
Corynebacterium mucifaciens	0	0	0	0	0	0	0	0	0	0	0	0.114469	0	0	0	0	0	0	0	0	0	0	0	0	0	0	0	0	0	0	0	0	0	0	0	0	0	0	0	0	0	0	0	0	0	0	0	0	0
Corynebacterium pilbarense	0	0	0	0	0	0	0	0	0	0	0	0	0	0	0	0	0	0	0	0	0	0	0	0	0	0	0	0	0	0	0	0	0	0	0	0	0	0	0	0	0	0	0	0.0223418	0	0	0	0	0
Corynebacterium pseudodiphtheriticum propinquum	0	0	0	0	0	0	0	0	0	0	0	0	0	0	0	0	0	0.80955	0	0.0344234	0	0	0	0	0	0	0	0	0	0	0	0	0	0	0	0	0	0	0	0	0	0	0	0	0	0	0	0	0
Corynebacterium pseudogenitalium	0	0	0	0	0	0	0	0	0	0	0	0	0	0.331853	0.0237381	0	0	0.0548847	0	0	0	0.00732963	0	0	0	0	0	0	0	0	0.316173	0.0458505	0.258974	0	0	0	0	0	0.00587751	0	0	0	0	0	0	0	0	0	0
Corynebacterium pyruviciproducens	0	0.0628369	0	0.0671554	0	0	0.100727	0	0.0118347	0	0.0422	0.0143086	0	0	0	0	0	1.30351	0	0	0	0	0	0	0	0	0.175762	0	0	0	0.0484459	0	0	0	0	0	0	0	0	0	0.383643	0	56.6261	24.2389	0	0	0.0363612	0	0
Corynebacterium riegelii	0	0	0	0	0	0	0	0	0	0	0	0	0	0	0	0	0	0	0	0	0	0	0	0	0	0	0	0	0	0	0	0	0	0	0	0	0	0	0	0	0	0	0	0	0	0	0	0	0
Corynebacterium riegelii/ureicelerivorans	0	0	0	0	0	0	0	0	0	0	0	0	0	0	0	0	0	0	0	0	0	0	0	0	0	0	0	0	0	0	0	0	0	0	0	0	0	0	0	0	0	0	0	0	0	0	0	0	0
Corynebacterium simulans	0	0	0	0	0	0	0	0	0	0	0	0	0	0	0	0	0	0	0	0	0	0	0	0	0	0	0	0	0	0	0	0	0	0	0	0	0	0	0	0	0	0	0	0	0.0169523	0	0	0	0
Corynebacterium thomsenii	0	0	0	0	0	0	0	0	0	0	0	0	0	0	0	0	0	0	0	0	0	0	0	0	0	0	0	0	0	0	0.035697	0	0	0	0	0	0	0	0.0323263	0	0	0	0	0	0	0	0	0	0
Corynebacterium tuberculostearicum/pseudogenitalium	0	0.0396865	0	0.654765	0	0	0.0251818	0.0113518	0.476345	0	0.931917	25.2318	0.148992	0.354276	0.0604243	0	0.0130504	1.82492	0	0.320402	0.038247	0.0476426	0.0435473	3.10016	0.022042	0.177929	0.0593198	0.186072	0	0.132543	1.24684	2.9197	0.140101	0	0	0	0	0	0	0.0508238	0	0	2.96566	6.53194	0.0320211	0	0.0431789	0	0
Corynebacterium tuscaniense	0	0	0	0	0	0	0	0	0	0	0	0	0	0	0	0	0	0	0	0	0	0	0	0	0	0	0	0	0	0	0	0	0	0	0	0	0	0	0	0	0	0	0	0	0	0	0	0	0
Corynebacterium urealyticum	0	0	0	0	0	0	0	0	0	0	0	0	0	0	0	0	0	0	0	0.0820866	0	0	0	0	0	0	0	0	0	0	0	0	0	0	0	0	0	0	0	0	0	0	0	0	0	0	0	0	0
Corynebacterium ureicelerivorans	0	0	0	0	0	0	0	0	0	0	0	0	0	0	0	0	0	0	0	0	0	0	0	0	0	0	0	0	0	0	0	0	0	0	0	0	0	0	0	0	0	0	0	0	0	0	0	0	0
Corynebacterium vitaeruminis	0	0	0	0	0	0	0	0	0	0	0	0	0	0	0	0	0	0	0	0	0	0	0	0	0	0	0	0	0	0	0	0	0	0	0	0	0	0	0	0	0	0	0.0102063	0	0	0	0	0	0
Coxiella	0	0	0	0	0	0	0	0	0	0	0	0	0	0	0	0	0	0	0	0	0	0	0	0	0	0	0	0	0	0	0	0	0	0	0	0	0	0	0	0	0	0	0	0	0	0	0	0	0
Criibacterium	0	0	0	0	0	0	0	0	0	0	0	0	0.0584283	0	0	0	0	0	0	0	0	0	0	0	0	0	0	0	0	0	0	0	0	0	0	0	0	0	0	0	0	0	0	0	0	0	0	0	0
Cupriavidus	0	0	0	0	0	0	0	0	0	0	0	0	0	0	0	0	0	0	0	0	0	0	0	0	0	0	0	0	0	0	0	0	0	0	0	0	0	0	0	0	0	0	0	0	0	0	0	0	0
Cupriavidus basiliensis/necator	0	0	0	0	0	0	0	0	0	0	0	0	0	0	0	0	0	0.0548847	0	0	0	0	0	0	0	0	0	0	0	0	0	0	0	0	0	0	0	0	0	0.0211766	0	0	0.0670701	0	0	0	0	0	0
Cupriavidus gilardii/respiraculi	0	0	0	0	0	0	0	0	0	0	0	0	0	0	0	0	0	0	0	0	0	0	0	0	0	0	0	0	0	0	0	0	0	0	0	0	0	0	0	0	0	0	0	0	0	0	0	0	0
Cupriavidus metallidurans/pauculus	0	0	0	0	0	0	0	0	0	0	0	0	0	0	0	0	0	0	0	0	0	0	0	0	0	0	0	0	0	0	0	0	0	0	0	0	0	0	0	0.0169413	0	0	0	0	0	0	0	0	0
Curtobacterium	0	0	0	0	0	0	0	0	0	0	0	0	0	0	0	0	0	0	0	0	0	0	0	0	0	0	0	0	0	0	0	0	0	0	0	0	0	0	0	0	0	0	0	0	0	0	0	0	0
Curvibacter	0	0	0	0	0	0	0	0	0	0	0	0	0	0	0	0	0	0	0	0	0	0	0	0	0	0	0	0	0	0	0	0	0	0	0	0	0	0	0	0	0	0	0	0	0	0	0	0	0
Cutibacterium	0	0	0	0	0	0	0	0	0	0	0	0	0	0	0	0	0	0	0	0	0	0	0	0	0	0	0	0	0	0	0	0	0	0	0	0	0	0	0	0	0	0	0	0	0	0	0	0	0
Cutibacterium acnes	0	0	0.0287642	0	0.00849762	0.0223214	0.0188863	0.00681106	0.071008	0.0134127	0.0773667	1.40224	0.122699	0.287008	0.0258961	0	0	4.32903	0	0.137694	0.0159363	0.00916204	0	0	0	0.286234	0.0109851	0	0.00509645	5.96268	0.0101991	0.00982511	0	0	0.00582411	0	0	0	0.00587751	0.0635297	0	0	0.384924	0.519955	0.0207195	0	0	0.0408065	0.0356141
Cutibacterium avidum	0	0	0	0	0	0	0	0	0	0	0.1055	0.0228938	0	0	0	0	0	0.123491	0	0	0.0318725	0	0	0	0	0.114107	0	0	0	0	0.130039	0	0	0	0	0	0	0	0	0	0	0	0.355763	0.105616	0	0	0	0	0
Cutibacterium granulosum	0	0	0	0	0	0	0	0	0	0	0.0597834	0.337683	0	0	0	0	0	0.219539	0	0	0	0	0	0	0	0.0174061	0	0	0	0.556331	0.0127489	0	0	0	0	0	0	0	0	0	0	0	0.00583218	0.0507769	0.0131852	0	0	0	0
Cytophagaceae	0	0	0	0	0	0	0	0	0	0	0	0	0	0	0	0	0	0	0	0	0	0	0	0	0	0	0	0	0	0	0	0	0	0	0	0	0	0	0	0	0	0	0	0	0	0	0	0	0
Cytophagales	0	0	0	0	0	0	0	0	0	0	0	0	0	0	0	0	0	0	0	0	0	0	0	0	0	0	0	0	0	0	0	0	0	0	0	0	0	0	0	0	0	0	0	0	0	0	0	0	0
Daeguia caeni	0	0	0	0	0	0	0	0	0	0	0	0	0	0	0	0	0	0	0	0	0	0	0	0	0	0	0	0	0	0	0	0	0	0	0	0	0	0	0	0	0	0	0	0	0	0	0	0	0
Dankookia	0	0	0	0	0	0	0	0	0	0	0	0	0	0	0	0	0	0	0	0	0	0	0	0	0	0	0	0	0	0	0	0	0	0	0	0	0	0	0	0	0	0	0	0	0	0	0	0	0
Deinococcus	0	0	0	0	0	0	0	0	0	0	0	0	0	0	0	0	0	0.0617453	0	0	0	0	0	0	0	0	0	0	0	0	0	0	0	0	0	0	0	0	0	0	0	0	0	0	0	0	0	0	0
Delftia acidovorans/lacustris	0	0	0	0	0	0	0	0	0	0	0	0	0	0	0	0	0	0	0	0	0	0	0	0	0	0	0	0	0	0	0	0	0	0	0	0	0	0	0	0	0	0	0	0	0	0	0	0	0
Deltaproteobacteria	0	0	0	0	0	0	0	0	0	0	0	0	0	0	0	0	0	0	0	0	0	0	0	0	0	0	0	0	0	0	0	0	0	0	0	0	0	0	0	0	0	0	0	0	0	0	0	0	0
Dermabacter hominis	0	0	0	0	0	0	0	0	0.0147933	0	0	0.503663	0	0.0224225	0	0	0	0.0548847	0.0043554	0.315107	0.0446215	0	0	0.0398532	0	0	0	0	0	0	0.0305974	0.040938	0.0254728	0	0	0	0	0	0	0	0	0	0	0	0	0	0	0	0
Dermacoccus nishinomiyaensis	0	0	0	0	0	0	0	0	0	0	0	0	0	0	0	0	0	0	0	0	0	0	0	0	0	0.0116041	0	0	0	0	0	0	0	0	0	0	0	0	0	0	0	0	0	0	0	0	0	0	0
Desulfovibrio piger	0	0	0	0	0	0	0	0	0	0	0	0	0	0	0	0	0	0	0	0	0	0	0	0	0	0	0	0	0	0	0	0	0	0	0	0	0	0	0	0	0	0	0	0	0	0	0	0	0
Desulfovibrionaceae	0	0	0	0	0	0	0	0	0	0	0	0	0	0	0	0	0	0	0	0	0	0	0	0	0	0	0	0	0	0	0	0	0	0	0	0	0	0	0	0	0	0	0	0	0	0	0	0	0
Devosia	0	0	0	0	0	0	0	0	0	0	0	0	0	0	0	0	0	0	0	0	0	0	0	0	0	0	0	0	0	0	0	0	0	0	0	0	0	0	0	0	0	0	0.0306189	0	0	0	0	0	0
Devosia submarina/riboflavina	0	0	0	0	0	0	0	0	0	0	0	0	0	0	0	0	0	0	0	0	0	0	0	0	0	0	0	0	0	0	0	0	0	0	0	0	0	0	0	0	0	0	0.31348	0	0	0	0	0	0
Dialister	0	0	0	0	0	0	0	0	0	0	0.0457167	0.0114469	0.385627	0	0	0	0	0	0.0087108	0	0.210359	0	0	0	0	0	0	0	0	0	0	0	0	0	0	0	0	0	0	0	0	0	0	0	0	0	0	0	0
Dialister invisus	0	0	0	0	0	0	0	0	0	0	0	0	0	0	0	0	0	0.0137212	0	0	0	0	0	0	0	0	0	0	0	0	0	0	0	0	0	0	0	0	0	0	0	0	0	0	0	0	0	0	0
Dialister micraerophilus	0	0	0	0	0	0	0.091284	0	0.0295867	0	0.172317	0.0114469	0.119778	0	0	0	0	0	0.0979965	0	0	0	0.012808	0.0167803	0	0	0.718429	0.0279109	0	0.00697593	0.0688442	0	0	0	0	0.0258894	0	0	0	0	0.0135404	0	0	0	0.329629	0	0	0	0
Dialister pneumosintes	0	0	0	0	0	0	0	0	0	0	0	0	0	0	0	0	0	0.0754665	0	0.00794386	0.146614	0	0	0	0	0	0	0	0	0	0.00764935	0	0.0700503	0	0	0	0	0	0	0	0	0	0	0	0	0	0	0	0
Dialister propionicifaciens	0	0	0	0	0	0	0.56659	0.0113518	0.0769254	0	0.101983	0	0.704061	0	0	0	0	0	0	0	0	0	0.00512321	0.132145	0.0198378	0.0116041	0.415239	0.123273	0	0	0.152987	0.00491256	1.65361	0	0	0	0	0	0.00587751	0	0	0	0.00437413	0.0121865	0.069693	0	0	0	0
Diaphorobacter nitroreducens/aerolatus	0	0	0	0	0	0	0	0	0	0	0	0	0.00876424	0	0	0	0	0	0	0	0	0	0	0	0	0.210807	0	0	0	0.00348797	0	0	0.072173	0	0	0	0	0	0	0	0	0	0.0729022	0.341221	0	0	0	0	0
Dietzia	0	0	0	0	0	0	0	0	0	0	0	0	0	0	0	0	0	0	0	0	0	0	0	0	0	0	0	0	0	0	0	0	0	0	0	0	0	0	0	0	0	0	0	0	0	0	0	0	0
Dokdonella kunshanensis	0	0	0	0	0	0	0	0	0	0	0	0	0	0	0	0	0	0	0	0	0	0	0	0	0	0	0	0	0	0.0226718	0	0	0	0	0	0.0086298	0	0	0	0.0338825	0	0	0	0	0	0	0	0	0
Dolosigranulum pigrum	0	0	0	0	0	0	0	0	0	0	0	0	0	0	0	0	0	1.00851	0	0.0370714	0	0	0	0	0	0	0	0	0	0	0	0	0	0	0	0	0	0	0	0	0	0	0	0	0	0	0	0	0
Dorea	0	0	0	0	0	0	0	0	0	0	0	0	0	0	0	0	0	0	0	0	0	0	0	0	0	0	0	0	0	0	0	0	0.00424547	0	0	0	0	0	0	0	0	0	0	0	0	0	0	0	0
Dorea longicatena	0	0	0	0	0	0	0	0	0	0	0	0	0	0	0	0	0	0	0	0	0	0	0	0	0	0	0	0	0	0	0	0	0	0	0.00873617	0	0	0	0	0	0	0	0	0	0	0	0	0	0
Duncaniella	0	0	0	0	0	0.00992063	0	0	0.0295867	0	0	0.00858516	0.280456	0	0	0	0	0	0	0.0476632	0.0191235	0	0	0	0	0	0	0	0	0	0.0127489	0.0376629	0.072173	0	0	0.0086298	0	0	0	0	0	0	0	0	0	0	0	0	0
Duodenibacillus	0	0	0	0	0	0	0	0	0	0	0	0	0	0	0	0	0	0.034303	0	0	0	0	0	0	0	0	0	0	0	0	0	0	0.00424547	0	0	0	0	0	0	0	0	0	0	0	0	0	0	0	0
Dyadobacter	0	0	0	0	0	0	0	0	0	0	0	0	0	0	0	0	0	0	0	0.00529591	0	0	0	0	0	0	0	0	0	0	0	0	0	0	0	0	0	0	0	0	0	0	0	0	0	0	0	0	0
Dysgonomonas capnocytophagoides	0	0	0	0	0	0	0	0	0	0	0	0	0	0	0	0	0	0	0	0	0	0	0	0	0	0	0	0	0	0	0	0	0	0	0	0	0	0	0	0	0	0	0	0	0	0	0	0	0
Dysosmobacter	0	0	0	0	0	0	0	0	0	0	0	0	0	0	0	0	0	0	0	0	0	0	0	0	0	0	0	0	0	0	0	0	0	0	0	0	0	0	0	0	0	0	0	0	0	0	0	0	0
Eggerthella lenta	0	0	0	0	0	0	0	0	0	0	0	0	0	0	0	0	0	0	0	0	0.0063745	0	0	0	0	0	0	0	0	0	0	0	0	0	0	0	0	0	0.00881627	0.00847063	0	0	0	0	0	0	0	0	0
Eggerthellaceae	0	0	0	0	0	0	0	0	0	0	0	0	0	0	0	0	0	0.0411636	0	0	0	0	0	0	0	0	0	0	0	0	0	0	0	0	0	0	0	0	0	0	0	0	0	0	0	0	0	0	0
Eikenella corrodens	0	0	0	0	0	0	0	0	0	0	0	0	0	0	0	0	0	0	0	0	0	0	0	0	0	0	0	0	0	0	0	0	0	0	0	0	0	0	0	0	0	0	0	0	0	0	0	0	0
Eisenbergiella	0	0	0	0	0	0	0	0	0	0	0	0	0	0	0	0	0	0	0	0	0.0063745	0	0	0	0	0	0	0	0	0	0	0	0	0	0	0	0	0	0	0	0	0	0	0	0	0	0	0	0
Elizabethkingia	0	0	0	0	0	0	0	0	0	0	0	0	0	0	0	0	0	0	0	0	0	0	0	0	0	0	0	0	0	0	0	0	0	0	0	0	0	0	0	0	0	0	0	0.00609323	0	0	0	0	0
Elusimicrobia	0	0	0	0	0	0	0	0	0	0	0	0	0	0	0	0	0	0	0	0	0	0	0	0	0	0	0	0	0	0	0	0	0	0	0	0	0	0	0	0	0	0	0	0	0	0	0	0	0
Elusimicrobium	0	0	0	0	0	0	0	0	0	0	0	0	0	0	0	0	0	0	0	0	0	0	0	0	0	0	0	0	0	0	0	0	0	0	0	0	0	0	0	0	0	0	0	0	0	0	0	0	0
Empedobacter falsenii	0	0	0	0	0	0	0	0	0	0	0	0	0	0	0	0	0	0	0	0	0	0	0	0	0	0	0	0	0	0	0	0	0	0	0	0	0	0	0	0	0	0	0.0349931	0	0	0	0	0	0
Enhydrobacter	0	0	0	0	0	0	0	0	0	0	0	0	0	0	0	0	0	0	0	0	0	0	0	0	0	0	0	0	0	0	0	0	0	0	0	0	0	0	0	0	0	0	0	0.00609323	0	0	0	0	0
Enhydrobacter aerosaccus/osloensis	0	0	0	0	0	0	0	0	0	0	0	0	0	0	0	0	0	0	0	0	0	0	0	0	0	0.0696244	0	0	0	0.00697593	0	0	0	0	0	0	0	0	0	0	0	0	0.00437413	0	0	0	0	0	0
Enorma	0	0	0	0	0	0	0	0	0	0	0	0	0	0	0	0	0	0	0	0	0	0	0	0	0	0	0	0	0	0	0	0	0	0	0	0	0	0	0	0	0	0	0	0	0	0	0	0	0
Enorma massiliensis	0	0	0	0	0	0	0	0	0	0	0	0	0	0	0	0	0	0	0	0	0	0	0	0	0	0	0	0	0	0	0	0	0	0	0	0	0	0	0	0	0	0	0	0	0	0	0	0	0
Ensifer	0	0	0	0	0	0	0	0	0	0	0	0	0	0	0	0	0	0	0	0	0	0	0	0	0	0	0	0	0	0	0	0	0	0	0	0	0	0	0	0	0	0	0.0116644	0.0385904	0	0	0	0	0
Enterobacter	0	0	0	0	0	0	0	0	0	0	0	0	0	0	0	0	0	0	0	0	0	0	0	0	0	0	0	0	0	0	0	0	0	0	0	0	0	0	0	0	0	0	0	0	0	0	0	0	0
Enterobacter cloacae/hormaechei/Escherichia IAI1	0	0	0	0	0	0	0	0	0	0	0	0	0	0	0	0	0	0	0	0	0	0	0	0	0	0	0	0	0	0	0	0	0	0	0	0	0	0	0	0	0	0	0	0.0507769	0	0	0	0	0
Enterobacter/Kosakonia/Yokenella	0	0	0	0	0	0.0669643	0	0	0	0	0	0	0	0	0	0	0	0.034303	0	0	0	0	0	0	0	0	0	0	0	0	0	0	0	0	0	0	0	0	0	0	0	0	0.096231	0.322941	0	0	0	0	0
Enterobacteriaceae	0	0	0	0	0	0	0	0	0	0	0	0	0	0	0	0	0	0	0	0	0	0	0	0	0	0	0	0	0	0	0	0	0	0	0	0	0	0	0	0	0	0	0	0	0	0	0	0	0
Enterobacteriales	0	0	0	0	0	0	0	0	0	0	0	0	0	0	0	0	0	0	0	0	0	0	0	0	0	0	0	0	0	0	0	0	0	0	0	0	0	0	0	0	0	0	0	0	0	0	0	0	0
Enterocloster	0	0	0	0	0	0	0	0	0	0	0	0	0	0	0	0	0	0	0	0.058255	0.025498	0	0	0	0	0	0	0	0	0	0	0	0	0	0	0	0	0	0	0.0381178	0	0	0	0	0	0	0	0	0
Enterocloster clostridioforme	0	0	0	0	0	0	0	0	0	0	0	0	0	0	0	0	0	0	0	0	0	0	0	0	0	0	0	0.00697772	0	0	0	0	0	0	0	0	0	0	0	0	0	0	0	0	0	0	0	0	0
Enterococcus	0	0	0	0	0	0	0	0	0	0	0	0	0	0	0	0	0	0	0	0	0	0	0	0	0	0	0	0	0	0	0	0	0	0	0	0	0	0	0	0	0	0	0	0	0	0	0	0	0
Enterococcus avium/gilvus	0	0	0	0	0	0	0	0	0	0	0	0	0	0	0	0	0	0	0	0	0	0	0	0	0	0	0	0	0	0	0	0	0	0	0	0	0	0	0	0	0	0	0	0	0.00941797	0	0	0	0
Enterococcus cecorum	0	0	0	0	0	0	0	0	0	0	0	0	0	0	0	0	0	0	0	0	0	0	0	0	0	0	0	0	0	0	0	0	0	0	0	0	0	0	0	0	0	0	0.0131224	0.0467147	0	0	0	0	0
Enterococcus faecalis	0	0.0628369	0	0.117522	0	0.014881	0	0	0	0	0	0	0	0	0	0	0	0.493963	0	0.193301	0.121116	0	0.0409857	0	0	0.0116041	0	0	0	0.245902	0	0	0	0	0	0	0	0	0	0	0	0	0	0.0446837	0	0.0432877	0.134082	0.0408065	0.0333882
Enterococcus faecium/hirae/durans/lactis	0	0	0	0.123118	0	0	0	0	0	0	0	0	0	0	0	0	0	0	0	0	0	0	0	0	0	0.00967006	0	0	0	0.0261597	0	0.00982511	0	0	0	0.230847	0	0	0	0	0	0	0.0568637	0	0	0.0324658	0.0863577	0	0
Enterococcus gallinarum/casseliflavius	0	0	0	0	0	0	0	0	0	0	0	0	0	0	0	0	0	0	0	0	0	0	0	0	0	0	0	0	0	0	0	0	0	0	0	0	0	0	0	0	0	0	0	0	0	0.0108219	0	0.0741936	0
Enterococcus mundtii	0	0	0	0	0	0	0	0	0	0	0	0	0	0	0	0	0	0	0	0	0	0	0	0	0	0	0	0	0	0	0	0	0	0	0	0	0	0	0	0	0	0	0	0	0	0	0	0	0
Enterococcus thailandicus/sanguinicola	0	0	0	0	0	0	0	0	0	0	0	0	0	0	0	0	0	0	0	0	0	0	0	0	0	0	0	0	0	0	0	0	0	0	0	0	0	0	0	0	0	0	0	0	0	0	0	0	0
Eremococcus	0	0	0	0	0	0	0	0	0	0	0	0	0	0	0	0	0	0	0	0	0	0	0	0	0	0	0	0	0	0	0	0	0	0	0	0	0	0	0	0	0	0	0	0	0	0	0	0	0
Eremococcus coleocola	0	0	0	0	0	0	0	0	0	0	0	0	0	0	0	0	0	0	0	0	0	0	0	0	0	0	0	0	0	0	0	0	0	0	0	0	0	0	0	0	0	0	0	0	0	0	0	0	0
Erysipelatoclostridium ramosum	0	0	0	0	0	0	0	0	0	0	0	0	0	0	0	0	0	0	0	0.00529591	0	0	0	0	0	0	0	0	0	0	0	0	0	0	0	0	0	0	0	0	0	0	0	0	0	0	0	0	0
Erysipelotrichaceae	0	0	0	0	0	0	0	0	0	0	0	0	0	0	0	0	0	0	0	0	0	0	0	0	0	0	0	0	0	0	0	0	0	0	0	0	0	0	0	0	0	0	0.0160385	0	0	0	0	0	0
Escherichia Shigella	0	0.0396865	0	68.1851	0	0.0421627	0	0	0.343205	0.00804764	0	0	0	0	0	0	0	3.71158	0.200348	37.9796	42.7251	0	6.25032	0.335606	0.0308588	0.0889645	0.0527287	0	0.0254823	25.4988	0	0	0	0.0775332	0.0116482	0	0	0	0	0	0	0	0	0.109678	0	0.189384	0	0	0
Eubacterium	0	0	0	0	0	0	0	0	0	0	0	0	0	0	0	0	0	0	0	0	0	0	0	0	0	0	0	0	0	0	0	0	0	0	0	0	0	0	0	0	0	0	0	0	0	0	0	0	0
Eubacterium brachy	0	0	0	0	0	0	0	0	0	0	0	0	0	0	0	0	0	0	0	0	0	0	0	0	0	0	0	0	0	0	0	0	0	0	0	0	0	0	0	0	0	0	0	0	0	0	0	0	0
Eubacterium sulci	0	0	0	0	0	0	0	0	0	0	0	0	0	0	0	0	0	0	0	0	0	0	0	0	0	0	0	0	0	0	0	0	0	0	0	0	0	0	0	0	0	0	0	0	0	0.0162329	0	0	0
Ezakiella	0	0	0	0	0	0	0	0	0	0	0	0	0.0467426	0	0	0	0	0	0	0.0714948	0	0	0	0	0	0	0	0	0	0	0	0	0	0	0	0	0	0	0.0176325	0	0	0	0	0	0	0	0	0	0
Facklamia	0	0	0	0	0	0	0	0	0	0	0	0	0.0204499	0	0	0	0	0	0	0	0.0063745	0	0	0	0	0	0	0	0	0	0	0	0	0	0	0	0	0	0	0	0	0	0	0	0	0	0	0	0
Facklamia hominis	0	0.00661441	0	0	0	0	0.0220341	0	0	0	0	0	0	0	0	0	0	0	0	0.00529591	0	0	0	0	0.00440839	0	0.0109851	0	0	0	0	0.0131002	0.080664	0	0	0	0	0	0	0	0	0	0.0116644	0.0649944	0	0	0	0	0
Facklamia ignava	0	0	0	0	0	0	0	0	0	0	0	0	0	0	0	0	0	0	0	0	0	0	0	0	0	0	0	0	0	0	0	0	0	0	0	0	0	0	0	0	0	0	0	0	0	0	0	0	0
Facklamia taetra	0	0.0132288	0	0	0	0	0	0	0	0	0	0	0	0	0	0	0	0	0	0	0	0	0	0	0	0	0	0	0	0	0	0	0	0	0	0	0	0	0	0	0	0	0	0	0	0	0	0	0
Faecalibacillus	0	0	0	0	0	0	0	0	0	0	0	0	0	0	0	0	0	0.0411636	0	0	0	0	0	0	0	0	0	0	0	0	0	0	0	0	0	0	0	0	0	0.00847063	0	0	0.0437413	0	0	0	0	0	0
Faecalibacterium	0	0	0	0	0	0	0	0	0	0	0	0	0	0	0	0	0	0.150933	0	0.0132398	0	0	0	0	0	0	0	0	0	0	0	0.00491256	0	0	0	0.0107873	0	0	0	0	0	0	0.0262448	0	0	0	0	0	0
Faecalibaculum	0	0	0	0	0	0	0	0	0	0	0	0	0	0	0	0	0	0	0	0	0	0	0	0	0	0	0	0	0	0	0	0	0	0	0	0	0	0	0	0	0	0	0	0	0	0	0	0	0
Faecalicoccus pleomorphus	0	0	0	0	0	0	0	0	0	0	0	0	0	0	0	0	0	0	0	0	0	0	0	0	0	0	0	0	0	0	0	0	0	0	0	0	0	0	0	0	0	0	0	0	0	0	0	0	0
Family I	0	0	0	0	0	0	0	0	0	0	0	0	0	0	0	0	0	0	0	0	0	0	0	0	0	0	0	0	0	0	0	0	0	0	0	0	0	0	0	0	0	0	0	0	0	0	0	0	0
Fannyhessea vaginae	0	0.0330721	0	0	0	0	0	0	0	0	0	0	0	0	0	0	0	0	2.64373	0.0794386	1.0741	0	0.138327	0	0	0	0	0	0	0	0	0	0	0	0.0407688	0	0	0	0.0411426	0	0	0	0.00437413	0	0	0	0	0	9.50229
Fastidiosipila	0	0	0	0	0	0	0	0	0	0	0	0	0	0	0	0	0	0	0	0	0	0	0	0	0	0	0	0	0	0	0.0101991	0	0	0	0	0	0	0	0	0	0	0	0	0	0	0	0	0	0
Fenollaria	0	0	0	0	0	0	0	0	0	0	0	0	1.52206	0	0	0	0	0	0	0.0317755	0.0223108	0	0	0	0	0	0	0	0	0	0.0892425	0.00491256	0.0700503	0	0	0	0	0	0.0499589	0	0	0	0	0	0	0	0	0	0
Finegoldia magna	0	0.552303	0	5.68023	0	0	13.5352	0.0249739	0.680494	0	2.52849	3.09066	0.90856	1.32293	0.131639	0	0	3.03924	0.117596	10.9387	1.32908	0.0238213	0.120396	11.7168	0.101393	0.203071	2.97038	0.15351	0	0.929543	1.07091	2.08784	7.14301	0	0.0145603	0.0107873	0.0109333	0	0.434936	2.38448	0.189565	0.0113783	0.301815	0.1503	0.0263703	0	1.27719	0.011129	0
Flavobacterium	0	0	0	0	0	0	0	0	0	0	0	0	0	0	0	0	0	0	0	0	0	0	0	0	0	0	0	0	0	0.00348797	0	0	0	0	0	0	0	0	0	0	0	0	0.00437413	0.0406215	0	0	0	0	0
Flavonifractor plautii	0	0	0	0	0	0	0	0	0	0	0	0	0	0	0	0	0	0	0	0	0.00956175	0	0	0	0	0	0	0	0	0	0	0	0	0	0	0	0	0	0	0	0	0	0	0	0	0	0	0	0
Fretibacterium	0	0	0	0	0	0	0	0	0	0	0	0	0	0	0	0	0	0	0	0	0	0	0	0	0	0	0	0	0	0	0	0	0	0	0	0	0	0	0	0	0	0	0	0	0	0	0	0	0
Fusicatenibacter	0	0	0	0	0	0	0	0	0	0	0	0	0	0	0	0	0	0	0	0	0.00956175	0	0	0	0	0	0	0	0	0	0	0	0	0	0	0	0	0	0	0	0	0	0	0	0	0	0	0	0
Fusicatenibacter saccharivorans	0	0	0	0	0	0	0	0	0	0	0	0	0	0	0	0	0	0	0	0	0	0	0	0	0	0	0	0	0	0	0	0	0	0	0	0	0	0	0	0	0	0	0	0	0	0	0	0	0
Fusobacterium	0	0.0760657	0	0	0	0	0	0	0	0	0	0	0	0	0	0	0	0	0	0	0	0	0	0	0	0	0	0	0	0	0	0	0	0	0	0	0	0	0	0	0	0	0	0	0	0	0	0	0
Fusobacterium nucleatum	0	0	0	0	0	0	0	0	0	0	0	0	0	0	0	0	0	0	0	0	0	0	0	0	0	0	0	0	0	0	0	0	0	0	0	0	0	0	0	0	0	0	0	0	0	0.073048	0	0	0
Fusobacterium nucleatum subsp. animalis	0	0	0	0	0	0	0.258113	0.00454071	0.115388	0	0	0	7.46129	0	0	0	0	0	0	0	0.0191235	0	0	0	0.00881679	0	0.318569	0	0	0	0.0331472	0	0	0	0	0.0647235	0	0	0.408487	0	0.103809	0	0.0554057	0	0.585798	0	0	0.0519355	0.106842
Fusobacterium nucleatum supsp. polymorphum	0	0	0	0	0	0	0	0	0	0	0	0	0	0	0	0	0	0.0137212	0	0	0	0	0	0	0	0	0	0	0	0	0	0	0	0	0	0	0	0	0	0	0	0	0	0	0	0.121747	0	0	0
Fusobacterium peridonticum	0	0	0	0	0	0	0	0	0	0	0	0	0	0	0	0	0	0	0	0	0	0	0	0	0	0	0	0	0	0	0	0	0	0	0	0	0	0	0	0	0	0	0	0	0	0	0	0	0
Fusobacterium varium	0	0	0	0	0	0	0	0	0	0	0	0	0	0	0	0	0	0	0	0	0	0	0	0	0	0	0	0	0	0	0	0	0	0	0	0	0	0	0	0	0	0	0	0	0	0	0	0	0
Gammaproteobacteria	0	0	0	0	0	0	0	0	0	0	0	0	0	0	0	0	0	0	0	0	0	0	0	0	0	0	0	0	0	0	0	0	0	0	0	0	0	0	0	0	0	0	0	0	0	0	0	0	0
Gardnerella	0	0	0	0	0	0	0	0	0	0	0	0	0	0	0	0	0	0	0	0	0	0	0	0	0	0	0	0	0	0	0	0	0	0	0	0	0	0	0	0	0	0	0	0	0	0	0	0	0
Gardnerella vaginalis	0	0.763965	28.317	0.039174	0	0	2.32302	0.0522181	0	0	42.2422	6.48752	0	0	0	38.8998	0.0182706	3.02552	47.0187	0.0529591	0	65.5892	27.358	0.0104877	36.7836	8.02421	0.0153792	0	0.0509645	0.0174398	0	0	0	0	0.0902737	68.348	0	0	0.161632	0	0	0	0.0204126	0.257947	0.00376719	0	0	0.0129839	48.4552
Gemella	0	0.0231504	0	0.0223851	0	0	0	0	0	0	0	0	0	0	0	0	0	0	0	0	0	0	0	0	0	0	0	0	0	0	0	0	0	0	0	0	0	0	0	0	0	0	0	0	0	0	0	0	0
Gemella haemolysans	0	0	0	0	0	0	0	0	0	0	0	0	0	0	0	0	0	0	0	0	0	0	0	0	0	0	0	0	0	0.00523195	0	0	0	0	0	0	0	0	0	0	0	0	0	0	0	0	0	0	0
Gemella morbillorum	0	0	0	0	0	0	0	0	0	0	0	0	0	0	0	0	0	0	0	0	0	0	0	0	0	0	0	0	0	0	0	0	0	0	0	0	0	0	0	0	0	0	0	0	0	0	0	0	0
Gemella sanguinis	0	0	0	0	0	0	0	0	0	0	0	0	0	0	0	0	0	0	0	0	0	0	0	0	0	0	0	0	0	0	0	0	0	0	0	0	0	0	0	0	0	0	0	0	0	0	0	0	0
Gemmatimonadaceae	0	0	0	0	0	0	0	0	0	0	0	0	0	0	0	0	0	0	0	0	0	0	0	0	0	0	0	0	0	0	0	0	0	0	0	0	0	0	0	0	0	0	0	0	0	0	0	0	0
Gemmiger	0	0	0	0	0	0	0	0	0	0	0	0	0	0	0	0	0	0	0	0	0	0	0	0	0	0	0	0	0	0	0	0	0	0	0	0	0	0	0	0	0	0	0	0	0	0	0	0	0
Geothrix	0	0	0	0	0	0	0	0	0	0	0	0	0	0	0	0	0	0	0	0	0	0	0	0	0	0	0	0	0	0	0	0	0	0	0	0	0	0	0	0	0	0	0	0	0	0	0	0	0
Gleimia	0	0	0	0	0	0	0	0	0	0	0	0	0	0	0	0	0	0	0	0.0317755	0.012749	0	0	0	0	0	0	0	0	0.0174398	0	0	0	0	0	0	0	0	0	0	0	0	0	0	0	0	0	0	0
Gleimia europaea	0	0	0	0	0	0	0	0	0	0	0	0	0.0116857	0	0	0	0	0	0	0	0	0	0	0	0	0	0	0	0	0	0	0	0.118873	0	0	0	0	0	0.0440813	0	0	0	0	0	0	0	0	0	0
Globicatella	0	0	0	0	0	0	0	0	0	0	0	0	0	0	0	0	0	0	0	0.0158877	0	0	0	0	0	0	0	0	0	0	0	0	0	0	0	0	0	0	0	0	0	0	0	0	0	0	0	0	0
Gordonibacter	0	0	0	0	0	0	0	0	0	0	0	0	0	0	0	0	0	0	0	0	0	0	0	0	0	0	0	0	0	0	0	0	0	0	0	0	0	0	0	0	0	0	0	0	0	0	0	0	0
GpIIa	0	0	0	0	0	0	0	0	0	0	0	0	0	0	0	0	0	0	0	0	0	0	0	0	0	0	0	0	0	0	0	0	0	0	0	0	0	0	0	0	0	0	0	0	0	0	0	0	0
Granulicatella	0	0	0	0	0	0	0	0	0	0	0	0	0	0	0	0	0	0.123491	0	0	0	0	0	0	0	0	0	0	0	0	0	0	0	0	0	0	0	0	0	0	0	0	0	0	0	0	0	0	0
Granulicatella adiacens/paraadiacens	0	0	0	0	0	0	0	0	0	0	0	0	0	0.026907	0	0	0	0	0	0	0	0	0	0	0	0	0	0	0	0	0	0	0	0	0	0	0	0	0	0	0	0	0	0	0	0	0.015908	0	0
Gulosibacter	0	0	0	0	0	0	0	0	0	0	0	0	0	0	0	0	0	0	0	0.058255	0.0063745	0	0	0	0	0	0	0	0	0	0	0	0	0	0	0	0	0	0	0.0254119	0	0	0	0	0	0	0	0	0
Gulosibacter bifida	0	0	0	0	0	0	0	0	0	0	0	0	0	0	0	0	0	0	0	0	0	0	0	0	0	0	0	0	0	0	0	0	0	0	0	0	0	0	0	0	0	0	0	0	0	0	0	0	0
Haematobacter	0	0	0	0	0	0	0	0	0	0	0	0	0	0	0	0	0	0	0	0	0	0	0	0	0	0	0	0	0	0.0139519	0	0	0	0	0	0	0	0	0	0	0	0	0	0	0	0	0	0	0
Haemophilus	0	0	0	0	0	0	0	0	0	0	0	0	0	0	0	0	0	0	0	0	0.025498	0	0	0	0	0	0	0	0	0	0	0	0	0	0	0	0	0	0	0	0	0	0	0	0	0	0	0	0
Haemophilus haemolyticus	0	0	0	0	0	0	0	0	0	0	0	0	0	0	0	0	0	0	0	0	0	0	0	0	0	0	0	0	0	0.00523195	0	0	0	0	0	0	0	0	0	0	0	0	0	0	0	0	0	0	0
Haemophilus parahaemolyticus	0	0	0	0	0	0	0	0	0	0	0	0	0	0	0	0	0	0	0	0	0	0	0	0	0	0	0	0	0	0	0	0	0	0	0	0	0	0	0	0	0	0	0	0	0	0	0	0	0
Haemophilus parainfluenzae	0	0	0	0	0	0	0	0	0	0	0	0	0	0	0.00431602	0	0	0.507684	0	0.0344234	0	0	0	0	0	0.0116041	0	0	0	0	0	0	0	0	0	0	0	0	0	0	0	0	0.0379092	0	0	0.0108219	0	0.0426613	0
Haemophilus sputorum	0	0	0	0	0	0	0	0	0	0	0	0	0	0	0	0	0	0	0	0	0	0	0	0	0	0	0	0	0	0	0	0	0	0	0	0	0	0	0	0	0	0	0	0	0.0226031	0	0	0	0
Hafnia	0	0	0	0	0	0	0	0	0	0	0	0	0	0	0	0	0	0	0	0	0	0	0	0	0	0	0	0	0	0	0	0	0	0	0	0	0	0	0	0	0	0	0	0	0	0	0	0	0
Halomonas	0	0	0	0	0	0	0	0	0	0	0	0	0	0	0	0	0	0	0	0	0	0	0	0	0	0	0	0	0	0	0	0	0	0	0	0	0	0	0	0	0	0	0	0	0	0	0	0	0
Helcococcus	0	0	0	0	0	0	0	0	0	0	0	0	0	0	0	0	0	0	0	0	0	0	0	0	0	0	0	0	0	0	0.0101991	0	0.0594366	0	0	0	0	0	0	0	0	0	0	0	0	0	0	0	0
Helicobacter pylori	0	0	0	0.179081	0	0	0	0	0	0	0	0	0	0	0	0	0	0	0	0	0	0	0	0	0	0	0	0	0	0	0	0	0	0	0	0	0	0	0	0	0	0	0	0	0	0	0	0	0
Herbaspirillum	0	0	0	0	0	0	0	0	0	0	0	0	0	0	0	0	0	0	0	0	0	0	0	0	0	0	0	0	0	0	0	0	0	0	0	0	0	0	0	0	0	0	0	0	0	0	0	0	0
Holdemanella	0	0	0	0	0	0	0	0	0	0	0	0	0	0	0	0	0	0	0	0	0.0063745	0	0	0	0	0	0	0	0	0	0	0	0	0	0	0	0	0	0.00881627	0.0254119	0	0	0	0	0	0	0	0	0
Holdemania	0	0	0	0	0	0	0	0	0	0	0	0	0	0	0	0	0	0	0	0	0	0	0	0	0	0	0	0	0	0	0	0	0	0	0	0	0	0	0	0	0	0	0	0	0	0	0	0	0
Howardella	0	0	0	0	0	0	0.113318	0	0	0	0	0.0228938	0	0	0	0	0	0	0	0	0	0	0	0	0	0	1.18859	0	0	0	0.0203983	0	0.0169819	0	0	0	0	0	0.00881627	0	0	0	0	0.00406215	0.416274	0	0	0	0
Hungatella	0	0	0	0	0	0	0	0	0	0	0	0	0	0	0	0	0	0	0	0	0	0	0	0	0	0	0	0	0	0	0	0	0	0	0	0	0	0	0	0	0	0	0	0	0	0	0	0	0
Hungatella hathewayi	0	0	0	0	0	0	0	0	0	0	0	0	0	0	0	0	0	0	0	0.188005	0	0	0	0	0	0	0	0	0	0	0	0	0	0	0	0	0	0	0	0	0	0	0	0	0	0	0	0	0
Hydrocarboniphaga effusa	0	0	0	0	0	0	0	0	0	0	0	0	0	0	0	0	0	0	0	0	0	0	0	0	0	0	0	0	0	0	0	0	0	0	0	0	0	0	0	0	0	0	0	0	0	0	0	0	0
Hydrotalea flava	0	0	0	0	0	0	0	0	0	0	0	0	0	0	0	0	0	0	0	0	0	0	0	0	0	0	0	0	0	0	0	0	0	0	0	0	0	0	0	0	0	0	0	0	0	0	0	0	0
Hymenobacter	0	0	0	0	0	0	0	0	0	0	0	0	0	0	0	0	0	0	0	0	0	0	0	0	0	0	0	0	0	0	0	0	0	0	0	0	0	0	0	0	0	0	0	0	0	0	0	0	0
Intestinibacter	0	0	0	0	0	0	0	0	0	0	0	0	0	0	0	0	0	0	0	0	0	0	0	0	0	0	0	0	0	0	0	0	0	0	0	0	0	0	0	0	0	0	0	0	0	0	0	0	0
Intestinibacter bartlettii	0	0	0	0	0	0	0	0	0	0	0	0	0	0	0	0	0	0	0	0	0	0	0	0	0	0	0	0	0	0	0	0	0	0	0	0	0	0	0	0	0	0	0	0	0	0	0	0	0
Intestinimonas	0	0	0	0	0	0	0	0	0	0	0	0	0	0	0	0	0	0	0	0	0	0	0	0	0	0	0	0	0	0	0	0	0	0	0	0	0	0	0	0	0	0	0	0	0	0	0	0	0
Isoptericola variabilis	0	0	0	0	0	0	0	0	0	0	0	0	0	0	0	0	0	0	0	0	0	0	0	0	0	0	0	0	0	0	0	0	0	0	0	0	0	0	0.0176325	0	0	0	0	0	0	0	0	0	0
Jeotgalicoccus	0	0	0	0	0	0	0	0	0	0	0	0	0	0	0	0	0	0	0	0	0	0	0	0	0	0	0	0	0	0	0	0	0	0	0	0	0	0	0	0	0	0	0	0	0	0	0	0	0
Jonquetella	0	0	0	0	0	0	0	0	0	0	0	0.00572344	2.09173	0	0	0	0	0	0	0.055607	0	0	0	0	0	0	0.0307584	0.048844	0	0	0.165736	0.0131002	0.00636821	0	0	0	0	0	0	0	0	0	0	0	0	0	0	0	0
Kallipyga	0	0	0	0	0	0	0	0	0	0	0	0	0.18697	0	0	0	0	0	0	0	0	0	0	0	0	0	0	0	0	0	0	0	0	0	0	0	0	0	0	0	0	0	0	0	0	0	0	0	0
Kineosporiaceae	0	0	0	0	0	0	0	0	0	0	0	0	0	0	0	0	0	0	0	0	0	0	0	0	0	0	0	0	0	0	0	0	0	0	0	0	0	0	0	0	0	0	0	0	0	0	0	0	0
Klebsiella	0	0	0	0	0	0	0	0	0	0	0	0	0	0	0	0	0	0.541987	0	0	0	0	0	0	0	0	0	0.0302368	0	0	0	0	0	0	0	0	0	0	0	0	0	0	0	0	0	0	0	0	0
Klebsiella/Raoultella/Enterobacter	0	0	0	0	0	0	0	0	0	0	0	0	0	0	0	0	0	0	0	0	0	0	0	0	0	0	0	0	0	0	0	0	0	0	0	0	0	0	0	0	0	0	0.0801925	0	0	0	0	0	0.160264
Knoellia	0	0	0	0	0	0	0	0	0	0	0	0	0	0	0	0	0	0	0	0	0	0	0	0	0	0	0	0	0	0	0	0	0	0	0	0	0	0	0	0	0	0	0	0	0	0	0	0	0
Kocuria	0	0	0	0	0	0	0	0	0	0	0	0	0	0	0	0	0	0	0	0	0	0	0	0	0	0	0	0	0	0	0	0	0	0	0	0	0	0	0	0	0	0	0	0	0	0	0	0	0
Kocuria koreensis	0	0	0	0	0	0	0	0	0	0	0	0	0	0	0	0	0	0	0	0	0	0	0	0	0	0	0	0	0	0	0	0	0	0	0	0	0	0	0	0	0	0	0	0	0	0	0	0	0
Kocuria kristinae rosea	0	0	0	0	0	0	0	0	0	0	0	0	0	0	0	0	0	0	0	0	0	0	0	0	0	0	0	0	0	0	0	0	0	0	0	0	0	0	0	0	0	0	0	0	0	0	0	0	0
Kocuria palustris	0	0	0	0	0	0	0	0	0	0	0	0	0	0	0	0	0	0	0	0	0	0	0	0	0	0	0	0	0	0	0	0	0	0	0	0	0	0	0	0	0	0	0.00874827	0.0304661	0	0	0	0	0
Kocuria rhizophila	0	0	0	0	0	0	0	0	0	0	0	0	0	0	0	0	0	0	0	0	0	0	0	0	0	0.00967006	0	0	0	0	0	0	0	0	0	0	0	0	0	0	0	0	0	0	0	0	0	0	0
Kocuria rosea/himachalensis	0	0	0	0	0	0	0	0	0	0	0	0	0	0	0	0	0	0	0	0	0	0	0	0	0	0	0	0	0	0	0	0	0	0	0	0	0	0	0	0	0	0	0	0	0	0	0	0	0
Ktedonobacterales	0	0	0	0	0	0	0	0	0	0	0	0	0	0	0	0	0	0	0	0	0	0	0	0	0	0	0	0	0	0	0	0	0	0	0	0	0	0	0	0.0169413	0	0	0	0	0	0	0	0	0
Kytococcus	0	0	0	0	0	0	0	0	0	0	0	0	0	0	0	0	0	0	0	0	0	0	0	0	0	0	0	0	0	0	0	0	0	0	0	0	0	0	0	0	0	0	0	0.0203108	0	0	0	0	0
Labilithrix	0	0	0	0	0	0	0	0	0	0	0	0	0	0	0	0	0	0	0	0	0	0	0	0	0	0.00967006	0	0	0	0	0	0	0	0	0	0	0	0	0	0	0	0	0.0451994	0.0365594	0	0	0	0	0
Lachnospira	0	0	0	0	0	0	0	0	0	0	0	0	0	0	0	0	0	0	0	0	0	0	0	0	0	0	0	0.0139554	0	0	0	0	0	0	0	0	0	0	0	0	0	0	0	0	0	0	0	0	0
Lachnospira eligens	0	0	0	0	0	0	0	0	0	0	0	0	0	0	0	0	0	0	0	0	0	0	0	0	0	0	0	0	0	0	0	0	0	0	0	0	0	0	0	0	0	0	0	0	0	0	0	0	0
Lachnospiraceae	0	0	0	0	0	0	0	0	0	0	0	0	0	0	0	0	0	0.0480241	0	0	0.00956175	0	0	0	0	0.0135381	0	0.00697772	0	0.00348797	0	0	0	0	0	0.0086298	0	0	0	0	0	0	0.0291609	0.0203108	0	0.0162329	0	0	0
Lachnospiraceae incertae sedis	0	0	0	0	0	0	0	0	0	0	0	0	0	0	0	0	0	0	0	0	0	0	0	0	0	0	0	0	0	0	0	0	0	0	0	0	0	0	0	0	0	0	0	0	0	0	0	0	0
Lachnospiraceae incertae sedis Ruminococcus gnavus	0	0	0	0	0	0	0	0	0	0	0	0	0	0	0	0	0	0	0	0	0	0	0	0	0	0	0	0	0	0	0	0	0	0	0	0	0	0	0	0	0	0	0	0	0	0	0	0	0
Lacticaseibacillus casei/paracasei	0	0	0	0	0	0	0	0	0	0	0	0	0	0	0	0	0	0	0	0	0	0	0	0	0	0	0	0	0	0	0	0	0	0	0	0	0	0	0	0	0	0	0	0	0	0	0	0	0
Lacticaseibacillus rhamnosus	0	0	0	0	0	0	0	0	0	0	0	0.00572344	0	0	0	0.399083	0	0	0	0	0	0	0	0	0	0	0	0	0	0	0	0	0	0	0	0	0	0	0	0	0	0	0	0	0	0	0	0	0
Lactiplantibacillus plantarum/delbrueckii/pentosus	0	0	0	0	0	0	0	0	0	0	0	0	0	0	0	0	0	0	0	0	0	0	0	0	0	0	0	0	0	0	0	0	0	0	0	0	0	0	0	0	0	0	0	0	0	0	0	0	0
Lactobacillus	0	0	0	0	0	0	0	0	0	0	0	0	0	0	0	0	0	0	0	0	0	0	0	0	0	0	0.0285614	0	0	0	0	0	0	0	0	0	0	0	0	0	0	0	0	0	0	0	0	0	0
Lactobacillus acidophilus	0	0	0	0	0	0	0	0	0	0	0	0	0	0	0	0	0	0	0	0	0	0	0	0	0	0	0	0	0	0	0	0	0	0	0.0902737	0	0	0	0	0	0	0	0	0.0182797	0	0	0	0	0
Lactobacillus crispatus	100	0	0.0156896	0.82825	87.7294	95.6076	49.7183	99.3825	92.2365	97.3899	0.523984	1.11035	0.0175285	0	0	0.00539302	99.5458	17.6797	0.0174216	0.132398	0.159363	0.00732963	0	0	0	0	0	0.151184	0	0	0.00509957	0.00491256	0.13161	0.00894614	0.0669773	0	92.6491	96.9353	0.0440813	0	96.15	0	0.183714	0.0345283	0	0.00811644	0	97.8113	0.0712282
Lactobacillus delbrueckii	0	0	0	0	0	0	0	0	0	0	0	0	0	0	0	0	0	0	0	0	0	0	0	0	0	0	0	0	0	0	0	0	0	0	0	0.0194171	0	0	0	0	0	0	0	0	0	0	0	0	0
Lactobacillus farciminis	0	0	0	0	0	0	0	0	0	0	0	0	0	0	0	0	0	0	0	0	0.0478088	0	0	0	0	0	0	0	0	0	0	0	0	0	0	0	0	0	0	0	0	0	0	0	0	0	0	0	0
Lactobacillus fermentum	0	0	0	0	0	0	0.00629545	0	0	0	0	0	0	0	0	0	0	0	0	0	0	0	0	0	0	0	0	0	0	0	0	0	0	0	0	0	0	0	0	0	0	0	0	0	0	0	0	0	0
Lactobacillus gasseri	0	0	0	0	0	0	9.4652	0	0	0	1.7302	0.589515	0.0759568	0	0	60.4234	0	1.03595	1.85758	0.0503111	0.089243	20.6751	0.084533	0	0	0.0135381	0	0.0116295	0	0	0.178485	0	0	0	0	0	0	0	0	0	0	0	0	0	0	0	0	0	34.9241
Lactobacillus iners	0	85.9708	0.0261493	0.34697	0	0.00496032	0.610658	0	0	0.405065	0	0	39.5297	0.00896901	0	0	0.32104	0.356751	42.2757	0.0503111	4.16255	0.00916204	59.1039	0.0188778	49.1492	13.4897	0.0219703	0	99.0623	2.32822	90.0737	0.86461	0	56.7186	0.0320326	0	0	0	0	0	0.397184	33.2474	2.14187	8.8169	59.0469	89.4378	0.0204532	0	0.538664
Lactobacillus jensenii	0	0	0	0	10.9598	0	0	0.00908141	0	2.05215	0	0	29.8306	0	0	0	0.00522016	0.0274424	4.01786	0	0	0	0	0	0	0.0154721	53.557	63.7205	0.0101929	0.099407	0	0	0	16.121	0	29.7836	5.44116	2.23673	0	0	0	66.6692	0.102063	0	0	0	0	1.72129	2.976
Lactobacillus johnsonii/taiwanensis	0	0	0	0	0	0	0	0.00454071	0	0	0.175833	1.00446	0	0	0	0	0	0.185236	0	0	0	10.7727	0	0	0	0	0	0	0	0	0	0	0	0	0	0	0	0	0	0	0	0	0	0	0	0	0	0	0
Lactobacillus kalixensis	0	0.0132288	0	0	0	0	0	0	0	0	0	0	0	0	0	0	0	0	0	0	0	0	0	0	0	0	0	0	0	0	0	0	0	0	0	0	0	0	0	0	0	0	0	0	0	0	0	0	0
Lactobacillus salivarius	0	0	0	0	0	0	0	0	0	0	0	0	0	0	0	0	0	0	0	0	0	0	0	0	0	0	0	0	0	0	0	0	0	0	0	0	0	0	0	0	0	0	0	0	0	0	0	0	0
Lactococcus	0	0	0	0	0	0	0	0	0	0	0	0	0	0	0	0	0	0	0	0	0	0	0	0	0	0	0	0	0	0	0	0	0	0	0	0	0	0	0	0	0	0	0	0	0	0	0	0	0
Lactococcus lactis	0	0	0	0	0	0	0	0	0	0	0	0	0	0	0	0	0	0	0	0	0.00956175	0	0	0	0	0	0	0	0	0	0	0	0	0	0	0	0	0	0	0	0	0	0	0.0365594	0	0	0	0	0
Lancefieldella parvula	0	0	0	0	0	0	0	0	0	0	0	0	0	0	0	0	0	0.0411636	0	0	0	0	0	0	0	0	0	0	0	0.00871992	0	0	0	0	0	0	0	0	0	0	0	0	0.0247868	0	0	0	0	0	0
Lancefieldella rimae	0	0	0	0	0	0	0	0	0	0	0	0	0.0146071	0	0	0	0	0	0	0	0	0	0	0	0	0	0	0	0	0	0.0178485	0	0	0	0	0	0	0	0	0	0	0	0	0	0	0	0	0	0
Lautropia mirabilis	0	0	0	0	0	0	0	0	0	0	0	0	0	0	0	0	0	0	0	0	0	0	0	0	0	0	0	0	0	0	0	0	0	0	0	0	0	0	0	0	0	0	0	0	0	0	0	0	0
Lawsonella	0	0	0	0	0	0	0	0	0	0	0	0	0	0	0	0	0	0.644896	0	0	0	0	0	0	0	0.0212741	0	0	0	0.0156958	0	0	0	0	0	0	0	0	0	0	0	0	0	0	0	0	0	0	0
Lawsonella clevelandensis	0	0	0	0	0	0	0.396613	0.0227035	0.0414213	0	0.0668167	0.0887134	0.257084	0	0	0	0	0	0	0.0264795	0.0191235	0	0	0.00629261	0.00661259	0	0.250461	0.00697772	0	0	0	0	0.263219	0	0	0	0	0	0	0.0423531	0.0541614	0	0.00437413	0.0142175	0	0	0.00909029	0	0
Legionella	0	0	0	0	0	0	0	0	0	0	0	0	0	0	0	0	0	0	0	0	0.0063745	0	0	0	0	0	0	0	0	0	0	0	0	0	0	0	0	0	0	0	0	0	0.00729022	0.0426526	0	0	0	0	0
Leifsonia	0	0	0	0	0	0	0	0	0	0	0	0	0	0	0	0	0	0	0	0	0	0	0	0	0	0	0	0	0	0	0	0	0	0	0	0	0	0	0	0	0	0	0	0	0	0	0	0	0
Leptotrichia	0	0	0	0	0	0	0	0	0	0	0	0	0	0	0	0	0	0	0	0	0	0	0	0	0	0	0	0	0	0	0	0	0	0	0	0	0	0	0	0	0	0	0	0	0	0.0216439	0	0	0
Leptotrichia shahii	0	0	0	0	0	0	0	0	0	0	0	0	0	0	0	0	0	0	0	0	0	0	0	0	0	0	0	0	0	0	0	0	0	0	0	0	0	0	0	0	0	0	0	0	0	0	0	0	0
Leptotrichia wadei	0	0	0	0	0	0	0	0	0	0	0	0	0	0	0	0	0	0	0	0	0	0	0	0	0	0	0	0	0	0	0	0	0	0	0	0	0	0	0	0	0	0	0	0	0	0	0	0	0
Leuconostoc carnosum	0	0	0	0	0	0	0	0	0	0	0	0	0	0	0	0	0	0	0	0	0	0	0	0	0	0	0	0	0	0	0	0	0	0	0	0	0	0	0	0	0	0	0	0	0	0	0	0	0
Limosilactobacillus	0	0	0	0	0.265551	1.15327	0.277	0	0	0	0	0.0114469	0	0	0	0	0	0	0	0	0	0	0.00768482	0	0	0	0	0	0	0	0	0	0	0	0	0	0	0	0	0	0	0	0	0	0	0	0	0	0
Limosilactobacillus coleohominis	0	0	0	0	0	0	0	0	0	0	0	0	0	0	0	0	0	0	0	0	0	0	0	0	0	0	0	0	0	0	0	0	0	0	0	0	0	0	0	0	0	0	0	0	0	0	0	0	0
Limosilactobacillus oris	0	0	0	0	0	0	0	0	0	0	0	0	0	0	0	0	0	0	0	0	0	0	0	0	0	0	0	0	0	0	0	0	0	0	0	0	0	0	0	0	0	0	0	0	0	0	0	0	0
Limosilactobacillus reuteri	0	0	0	0	0	0	0	0	0	0	0	0.0629579	0	0	0	0	0	0	0	0	0	0	0	0	0	0	0	0	0	0	0	0	0	0	0	0	0	0	0	0	0	0	0	0	0	0	0	0	0
Limosilactobacillus vaginalis	0	0	0	0	0.987848	1.50298	0.462715	0	0	0	0	0	0	0	0	0	0	0	0.625	0	0.0446215	0.553387	0	0	0	0	4.17216	17.8978	0	0	0.0331472	0	0	0	0	0	1.19538	0.803001	0	0	0.91623	0	0	0	0	0	0	0	1.87864
Liquorilactobacillus ghanensis	0	0	0	0	0	0	0	0	0	0	0	0	0	0	0	0	0	0	0	0	0.0063745	0	0	0	0	0	0	0	0	0	0	0	0	0	0	0	0	0	0	0	0	0	0	0	0	0	0	0	0
Longicatena inocuum	0	0	0	0	0	0	0	0	0	0	0	0	0	0	0	0	0	0	0	0	0.012749	0	0	0	0	0	0	0	0	0	0	0	0	0	0	0	0	0	0	0	0	0	0	0	0	0	0	0	0
Luteimonas	0	0	0	0	0	0	0	0	0	0	0	0	0	0	0	0	0	0	0	0	0	0	0	0	0	0	0	0	0	0	0	0	0	0	0	0	0	0	0	0	0	0	0	0	0	0	0	0	0
Lysinibacillus	0	0	0	0	0	0	0	0	0	0	0	0	0	0	0	0	0	0	0	0	0	0	0	0	0	0	0	0	0	0	0	0	0	0	0	0	0	0	0	0	0	0	0.0699861	0	0	0	0	0	0
Macrococcus	0	0	0	0	0	0	0	0	0	0	0	0	0	0	0	0	0	0	0	0	0	0	0	0	0	0	0	0	0	0	0	0	0	0	0	0	0	0	0	0	0	0	0	0	0	0	0	0	0
Mageeibacillus indolicus	0	0	0	0	0	0	0	0	0	0	0	0	0	0	0	0	0	0	0	0	0	0	0	0	0	0	0	0	0	0	0	0	0	0	0	0	0	0	0	0	0	0	0	0	0	0	0	0	0
Magnetospirillum	0	0	0	0	0	0	0	0	0	0	0	0	0	0	0	0	0	0	0	0	0	0	0	0	0	0	0	0	0	0	0	0	0	0	0	0	0	0	0	0	0	0	0.00729022	0.0243729	0	0	0	0	0
Malacoplasma girerdii	0	0	0	0	0	0	0	0	0	0	0	0	0	0	0	0	0	0	0	0	0	0	0	0	0	0	0	0	0	0	0	0	0	0	0	0	0	0	97.167	0.694592	0	0	0	0	0	0	0	0	0
Massilia	0	0	0	0	0	0	0	0	0	0	0	0	0	0	0	0	0	0	0	0	0	0	0	0	0	0	0	0	0	0	0	0	0	0	0	0.0086298	0	0	0	0	0	0	0	0	0	0	0	0	0
Massilia alkalitolerans	0	0	0	0	0	0	0	0	0	0	0	0	0	0	0	0	0	0	0	0	0	0	0	0	0	0	0	0	0	0	0	0	0	0	0	0	0	0	0	0	0	0	0	0	0	0	0	0	0
Massilia aurea	0	0	0	0	0	0	0	0	0	0	0	0	0	0	0	0	0	0	0	0	0	0	0	0	0	0	0	0	0	0	0	0	0	0	0	0	0	0	0	0	0	0	0	0	0	0	0	0	0
Massilia timonae	0	0	0	0	0	0	0	0	0	0	0	0	0	0	0	0	0	0	0	0	0	0	0	0.00419507	0	0	0	0	0	0	0	0	0	0	0	0	0	0	0	0	0	0	0	0	0	0	0	0	0
Massilimicrobiota	0	0	0	0	0	0	0	0	0	0	0	0	0	0	0	0	0	0	0	0	0	0	0	0	0	0	0	0	0	0	0	0	0	0	0	0	0	0	0	0	0	0	0	0	0	0	0	0	0
Massiliprevotella	0	0	0	0	0	0	0	0	0	0	0	0	0	0	0	0	0	0	0	0	0	0	0	0	0	0	0	0	0	0	0	0	0	0	0	0	0	0	0	0	0	0	0	0	0	0	0	0	0
Mediterraneibacter	0	0	0	0	0	0	0	0	0	0	0	0	0	0	0	0	0	0	0	0	0.0223108	0	0	0	0	0	0	0	0	0	0	0	0	0	0	0	0	0	0	0	0	0	0	0	0	0	0	0	0
Mediterraneibacter torques L2 14	0	0	0	0	0	0	0	0	0	0	0	0	0	0	0	0	0	0	0	0	0	0	0	0	0	0	0	0	0	0	0	0	0	0	0	0	0	0	0	0	0	0	0	0	0	0	0	0	0
Megamonas	0	0	0	0	0	0	0	0	0	0	0	0	0	0	0	0	0	0.034303	0	0	0	0	0	0	0	0	0	0	0	0	0	0	0	0	0	0	0	0	0	0	0	0	0	0	0	0	0	0	0
Megasphaera	0	0	0	0	0	0	0	0	0	0	0	0	0	0	0	0	0	0	0	0	0	0	3.24299	0	13.1767	1.40796	0.00439406	0	0.412812	0.00697593	0	0	0	0	0	0	0	0	0	0	0	0	0	0	0	0	0	0	0
Megasphaera micronuciformis	0	0	0	0	0	0	0	0	0	0	0	0	0	0	0	0	0	0	0	0	0	0	0	0	0	0	0	0	0	0	0	0	0	0	0	0	0	0	0	0	0	0	0	0	0	0	0	0	0
Merdimonas	0	0	0	0	0	0	0	0	0	0	0	0	0	0	0	0	0	0	0	0	0	0	0	0	0	0	0	0	0	0	0	0	0	0	0	0	0	0	0	0	0	0	0	0	0	0	0	0	0
Metamycoplasma hominis	0	0.00661441	9.32744	8.35525	0	0	0	0.0272442	0.0118347	0	0	0	0	0	0	0	0	0	0	0	0	0	0.44572	58.3996	0	39.2237	0.0351525	0	0	0.00523195	0	0	0	0	0	0	0	0	0.0411426	94.4009	0	0	0	0	0	0	0	0	0
Metaprevotella	0	0	0	0	0	0	0	0	0	0	0	0.0543727	0.391469	0	0	0	0	0	0	0.0291275	0.0223108	0	0	0	0	0	0	0	0	0	0.112191	0	0.0191046	0	0	0	0	0	0	0	0	0	0	0	0	0	0	0	0
Methylobacterium adhaesivum/goesingense	0	0	0	0	0	0	0	0	0	0	0	0	0	0	0	0	0	0	0	0	0	0	0	0	0	0	0	0	0	0	0	0	0	0	0	0	0	0	0	0	0	0	0	0	0	0	0	0	0
Methylobacterium adhaesivum/marchantiae	0	0	0	0	0	0	0	0	0	0	0	0	0	0	0	0	0	0	0	0	0	0	0	0	0	0	0	0	0	0	0	0	0	0	0	0	0	0	0	0	0	0	0	0	0	0	0	0	0
Methylobacterium komagatae/persicinum	0	0	0	0	0	0	0	0	0	0	0	0	0	0	0	0	0	0	0	0	0	0	0	0	0	0	0	0	0	0	0	0	0	0	0	0	0	0	0	0	0	0	0	0	0	0	0	0	0
Methylobacterium oryzae/radiotolerans	0	0	0	0	0	0	0	0	0	0	0	0	0	0	0	0	0	0	0	0	0	0	0	0	0	0	0	0	0	0	0	0	0	0	0	0	0	0	0	0	0	0	0	0	0	0	0	0	0
Methylopila	0	0	0	0	0	0	0	0	0	0	0	0	0	0	0	0	0	0	0	0	0	0	0	0	0	0	0	0	0	0	0	0	0	0	0	0	0	0	0	0	0	0	0	0	0	0	0	0	0
Methylorubrum populi/thiocyanatum	0	0	0	0	0	0	0	0	0	0	0	0	0	0	0	0	0	0.0480241	0	0	0	0	0	0	0	0	0	0	0	0	0	0	0	0	0	0	0	0	0	0	0	0	0	0	0	0	0	0	0
Methylotenera	0	0	0	0	0	0	0	0	0	0	0	0	0	0.0313915	0	0	0	0	0	0	0	0	0	0	0	0	0	0	0	0	0	0	0	0	0	0	0	0	0	0	0	0	0	0	0	0	0	0	0
Methyloversatilis	0	0	0	0	0	0	0	0	0	0	0	0	0	0	0	0	0	0	0	0	0	0	0	0	0	0	0	0	0	0	0	0	0	0	0	0	0	0	0	0	0	0	0	0	0	0	0	0	0
Microbacteriaceae	0	0	0	0	0	0	0	0	0	0	0	0	0	0	0	0	0	0	0	0	0	0	0	0	0	0	0	0	0	0	0	0	0	0	0	0	0	0	0	0	0	0	0.00583218	0.0162486	0	0	0	0	0
Microbacterium	0	0	0	0	0	0	0	0	0	0	0	0	0.0408998	0	0	0	0	0	0	0	0	0	0	0	0	0.00967006	0	0	0	0	0	0	0	0	0	0	0	0	0	0	0	0	0	0	0	0	0	0	0
Microbacterium ginsengisoli	0	0	0	0	0	0	0	0	0	0	0	0	0	0	0	0	0	0	0	0	0	0	0	0	0	0	0	0	0	0.00348797	0	0.00327504	0	0	0	0	0	0	0	0.0254119	0	0	0.00291609	0.0182797	0	0	0	0	0
Microbacterium testaceum	0	0	0	0	0	0	0	0	0	0	0	0	0	0	0	0	0	0	0	0	0	0	0	0	0	0	0	0	0	0.00697593	0	0	0	0	0	0	0	0	0	0	0	0	0	0	0	0	0	0	0
Micrococcales	0	0	0	0	0	0	0	0	0	0	0	0	0	0	0	0	0	0	0	0	0	0	0	0	0	0	0	0	0	0	0	0	0	0	0	0	0	0	0	0	0	0	0	0	0	0	0	0	0
Micrococcus	0	0	0	0	0	0	0	0	0	0	0	0	0	0	0	0	0	0.0411636	0	0	0	0	0	0	0	0	0	0	0	0	0	0	0	0	0	0	0	0	0	0	0	0	0	0.0182797	0	0	0	0	0
Micrococcus luteus/aloeverae	0	0	0	0	0	0	0	0	0	0	0	0	0	0	0	0	0	0.0411636	0	0	0	0	0	0	0	0.0483503	0	0	0.00509645	0	0.0127489	0	0	0	0	0	0	0	0	0	0	0	0.0247868	0.00609323	0	0	0	0	0
Micrococcus lylae	0	0	0	0	0	0	0	0	0	0	0	0	0	0	0	0	0	0	0	0	0	0	0	0	0	0	0	0	0	0	0	0	0	0	0	0	0	0	0	0	0	0	0	0	0	0	0	0	0
Micrococcus terreus	0	0	0	0	0	0	0	0	0	0	0	0	0	0	0	0	0	0	0	0	0	0	0	0	0	0	0	0	0	0	0	0	0	0	0	0	0	0	0	0	0	0	0	0	0	0	0	0	0
Microlunatus	0	0	0	0	0	0	0	0	0	0	0	0	0	0	0	0	0	0	0	0	0	0	0	0	0	0	0	0	0	0	0	0	0	0	0	0	0	0	0	0	0	0	0	0	0	0	0	0	0
Microvirga	0	0	0	0	0	0	0	0	0	0	0	0	0	0	0	0	0	0	0	0	0	0	0	0	0	0	0	0	0	0	0	0	0	0	0	0	0	0	0	0	0	0	0	0	0	0	0	0	0
Mobiluncus	0	0	0	0	0	0	0	0	0.0147933	0	0.01055	0.131639	0.560911	0	0	0	0	0	0	0.0158877	0.101992	0	0	0	0	0	0	0	0	0	0	0.00818759	0	0	0	0	0	0	0	0	0	0	0	0	0	0	0	0	0
Mobiluncus curtisii	0	0	0	0	0	0	0	0	0	0	0	0.105884	0.0993281	0	0	0.010786	0	0	0	0	0	0	0	0	0	0	0.0417436	0.148858	0	0	0.0203983	0	0.0849095	0	0	0	0	0	0	0	0	0	0.0160385	0.0243729	0	0	0	0	0
Mobiluncus molieris	0	0	0	0	0	0	0	0	0	0	0	0	0.0730353	0	0	0	0	0	0	0.0423673	0.0860558	0	0	0	0	0	0.149398	0.0814067	0	0.0122079	0	0	0	0	0	0	0	0	0	0	0	0	0	0	0	0	0	0	0
Monoglobus	0	0	0	0	0	0	0	0	0	0	0	0	0	0	0	0	0	0	0	0	0	0	0	0	0	0	0	0	0	0	0	0	0	0	0	0	0	0	0	0	0	0	0	0	0	0	0	0	0
Moraxella catarrhalis	0	0	0	0	0	0	0	0	0	0	0	0	0	0	0	0	0	0.0548847	0	0	0	0	0	0	0	0	0	0	0	0	0	0	0	0	0	0	0	0	0	0	0	0	0	0	0	0	0	0	0
Moraxellaceae	0	0	0	0	0	0.00992063	0	0	0	0	0	0	0	0	0	0	0	0	0	0	0	0	0	0	0	0	0	0	0	0	0	0	0	0	0	0	0	0	0	0	0	0	0	0	0	0	0	0	0
Morganella morganii	0	0	0	0	0	0	0	0	0	0	0	0	0	0	0	0	0	0	0	0	0	0	0	0	0	0	0	0	0	0	0	0	0	0	0	0	0	0	0	0	0	0	0	0	0	0	0	0	0
Moryella	0	0	0	0	0	0	0	0	0	0	0	0.0228938	0	0	0	0	0	0	0	0	0.0828685	0	0	0	0	0.00773605	0	0	0	0	0	0	0.0615594	0	0	0	0	0	0	0	0	0	0	0	0	0	0	0	0
Moryella indoligenes	0	0	0	0	0	0	0	0	0	0	0	0	0	0	0	0	0	0	0	0.455448	0.379283	0	0	0	0	0	0	0	0	0	0	0	0	0	0	0	0	0	0	0	0	0	0	0	0	0	0	0	0
Mucilaginibacter	0	0	0	0	0	0	0	0	0	0	0	0	0	0	0	0	0	0	0	0	0	0	0	0	0	0	0	0	0	0	0	0	0	0	0	0	0	0	0	0	0	0	0	0	0	0	0	0	0
Mucispirillum	0	0	0	0	0	0	0	0	0	0	0	0	0	0	0	0	0	0	0	0	0	0	0	0	0	0	0	0	0	0	0	0	0	0	0	0	0	0	0	0	0	0	0	0	0	0	0	0	0
Murdochiella	0	0	0	0	0	0	0.00944317	0	0	0	0	0.0858516	0.0408998	0	0	0	0	0	0	0.0158877	0.4749	0	0	0	0	0	0	0.0302368	0	0	0	0	0.0445775	0	0	0	0	0	0	0	0	0	0	0	0	0	0	0	0
Muribaculaceae	0	0	0	0	0	0	0	0	0	0	0	0	0	0	0	0	0	0	0	0	0	0	0	0	0	0	0	0	0	0	0	0	0	0	0	0.0129447	0	0	0	0	0	0	0	0	0	0	0	0	0
Mycobacterium gordonae	0	0	0	0	0	0	0	0	0	0	0	0	0	0	0	0	0	0	0	0	0	0	0	0	0	0	0	0	0	0	0	0	0	0	0	0	0	0	0	0	0	0	0	0	0	0	0	0	0
Mycobacterium obuense	0	0	0	0	0	0	0	0	0	0	0	0	0	0	0	0	0	0	0	0	0	0	0	0	0	0	0	0	0	0	0	0	0	0	0	0	0	0	0	0	0	0	0	0.0121865	0	0	0	0	0
Mycoplasma spermatophilum	0	0	0	0	0	0	0	0	0	0	0	0	0	0	0	0	0	0	0.0174216	2.98424	0.427092	0	0	0.0524384	0	0	0	0	0	0.0156958	0	0	0	0	0	0	0	0	0	0	0	0	0	0	0	0	0	0	0
Mycoplasmoides genitalium	0	0	0	0	0	0	0	0	0	0	0	0	0	0	0	0	0	0	0	0	0	0	0	0	0	0	0	0	0	0	0	0	0	0	0	0	0	0	0	0	0	0	0	0	0	0	0	0	0
Myxococcales	0	0	0	0	0	0	0	0	0	0	0	0	0.00584283	0.0224225	0	0	0	0.0411636	0	0	0	0	0	0	0	0	0	0	0	0	0	0	0	0	0	0	0	0	0	0	0	0	0	0	0	0	0	0	0
Negativibacillus	0	0	0	0	0	0	0	0	0	0	0	0	0	0	0	0	0	0	0	0	0	0	0	0	0	0	0	0	0	0	0	0	0	0	0	0	0	0	0	0	0	0	0	0	0	0	0	0	0
Negativicoccus succinivorans	0	0	0	0.0223851	0	0	0	0	0	0	0.0668167	0	0.00876424	0	0	0	0	0.0960483	0	0	0	0	0	0	0	0	0	0	0	0	0.0254978	0	0	0	0	0	0	0	0	0	0	0	0	0	0	0	0	0	0
Neglecta	0	0	0	0	0	0	0	0	0	0	0	0	0	0	0	0	0	0	0	0	0	0	0	0	0	0	0	0	0	0	0	0	0	0	0	0	0	0	0	0	0	0	0	0	0	0	0	0	0
Neisseria	0	0	0	0	0	0	0	0	0	0	0	0	0	0	0	0	0	0	0	0	0	0	0	0	0	0	0	0	0	0	0	0	0	0	0	0	0	0	0	0	0	0	0	0	0	0	0	0	0
Neisseria mucosa/macacae/pharyngis	0	0	0	0	0	0	0	0	0	0	0	0	0	0	0.00863204	0	0	0	0	0	0	0	0	0	0	0	0	0	0	0.00871992	0	0	0	0	0	0	0	0	0	0	0	0	0	0	0	0	0	0	0
Neisseria perflava/subflava/flavescens	0	0	0	0	0	0	0	0	0	0	0	0	0	0	0	0	0	0.178375	0	0.0132398	0.0286853	0	0	0	0	0	0	0	0	0	0	0	0	0	0	0	0	0	0	0	0	0	0	0	0	0	0	0	0
Neisseriaceae	0	0	0	0	0	0	0	0	0	0	0	0	0.131464	0	0	0	0	0.171515	0	0	0	0	0	0	0	0	0	0	0	0.00871992	0	0	0	0	0	0	0	0	0.0205713	0	0	0.0379276	10.8406	38.6493	0	0	0	0	0.0155812
Niveispirillum	0	0	0	0	0	0	0	0	0	0	0	0	0	0	0	0	0	0	0	0	0	0	0	0	0	0	0	0	0	0	0	0	0	0	0	0	0	0	0	0	0	0	0	0.0243729	0	0	0	0	0
Nocardioides	0	0	0	0	0	0	0	0	0	0	0	0	0	0	0	0	0	0	0	0	0	0	0	0	0	0	0	0	0	0	0	0	0	0	0	0	0	0	0	0.0211766	0	0	0	0	0	0	0	0	0
Nosocomiicoccus	0	0	0	0	0	0	0	0	0	0	0	0	0	0	0	0	0	0	0	0	0	0	0	0	0	0	0	0	0	0	0	0	0	0	0	0	0	0	0	0	0	0	0	0	0	0	0	0	0
Novispirillum	0	0	0	0	0	0	0	0	0	0	0	0	0	0	0	0	0	0	0	0	0	0	0	0	0	0	0	0	0	0	0	0	0	0	0	0	0	0	0	0	0	0	0.00583218	0	0	0	0	0	0
Novosphingobium	0	0	0	0	0	0	0	0	0	0	0	0	0	0	0	0	0	0	0	0	0	0	0	0	0	0	0	0	0	0	0	0	0	0	0	0	0	0	0	0	0	0	0	0	0	0	0	0	0
Odoribacter splanchnicus	0	0	0	0	0	0	0	0	0	0	0	0	0	0	0	0	0	0	0	0	0	0	0	0	0	0	0	0	0	0	0	0	0	0	0	0	0	0	0	0	0	0	0	0	0	0	0	0	0
Oligella urethralis	0	0	0	0	0	0	0	0	0	0	0	0	0	0	0	0	0	0	0	0	0	0	0	0	0	0	0	0	0	0	0	0	0	0	0	0	0	0	0	0	0	0	0	0	0	0	0	0	0
Olsenella	0	0	0	0	0	0	0.415499	0	0	0	0	0.380609	0.338884	0	0	0	0	0	0	0	0.168924	0	0	0	0	0.00773605	0.125231	0.0558217	0	0	0.0178485	0	0.0254728	0	0	0	0	0	0	0	0	0	0	0	0	0	0	0	0
Olsenella uli	0	0	0	0	0	0	0	0	0	0	0	0	0.035057	0	0	0	0	0	0	0	0	0	0	0	0	0	0	0	0	0	0	0	0	0	0	0	0	0	0	0	0	0	0	0	0	0	0	0	0
Oribacterium sinus	0	0	0	0	0	0	0	0	0	0	0	0	0	0	0	0	0	0	0	0	0	0	0	0	0	0	0	0	0	0	0	0	0	0	0	0	0	0	0	0	0	0	0	0	0	0	0	0	0
Oscillibacter	0	0	0	0	0	0	0	0	0	0	0	0	0	0	0	0	0	0	0	0	0	0	0	0	0	0	0	0	0	0	0	0	0	0	0	0	0	0	0	0	0	0	0	0	0	0	0	0	0
Ottowia	0	0	0	0	0	0	0	0	0	0	0	0	0	0	0	0	0	0.0686059	0	0	0	0	0	0	0	0	0	0	0	0	0	0	0	0	0	0	0	0	0	0	0	0	0	0	0	0	0	0	0
Oxalobacteraceae	0	0	0	0	0	0	0	0	0	0	0	0	0	0	0	0	0	0	0	0	0	0	0.00768482	0	0	0.0348122	0.00439406	0	0	0.0540635	0.0127489	0.0229253	0	0	0	0.0841406	0	0	0.00881627	0.0338825	0	0	0	0	0	0	0	0	0
Paenibacillus	0	0	0	0	0	0	0	0	0	0	0	0	0	0	0	0	0	0	0	0	0	0	0	0	0	0.00580203	0	0	0	0	0	0	0	0	0	0	0	0	0	0	0	0	0	0	0	0	0	0	0
Pandoreae apista	0	0	0	0	0	0	0	0	0	0	0	0	0	0	0	0	0	0	0	0	0	0	0	0	0	0	0	0	0	0	0	0	0	0	0	0	0	0	0	0	0	0	0	0	0	0	0	0	0
Pantoea	0	0	0	0	0	0	0	0	0	0	0	0	0.0146071	0	0	0	0	0	0	0	0	0	0	0	0	0	0	0	0	0	0	0	0	0	0	0	0	0	0	0	0	0	0	0	0	0	0	0	0
Pantoea calida	0	0	0	0	0	0	0	0	0	0	0	0	0	0.0134535	0	0	0	0	0	0	0	0	0	0	0	0	0	0	0	0	0	0	0	0	0	0	0	0	0	0	0	0	0	0	0	0	0	0	0
Parabacteroides	0	0	0	0	0	0	0	0	0	0	0	0	0	0	0	0	0	0	0	0	0	0	0	0	0	0	0	0	0	0	0	0	0	0	0	0	0	0	0	0	0	0	0	0	0	0	0	0	0
Parabacteroides distasonis	0	0	0	0	0	0	0	0	0	0	0	0	0	0	0	0	0	0	0	0.00794386	0.050996	0	0	0	0	0	0	0.0139554	0	0	0	0	0	0	0	0	0	0	0	0	0	0	0.0116644	0.0670255	0	0	0	0	0
Parabacteroides merdae	0	0	0	0	0	0	0	0	0	0	0	0	0	0	0	0	0	0	0	0	0	0	0	0	0	0	0	0	0	0	0	0	0	0	0	0	0	0	0	0	0	0	0	0.0142175	0	0	0	0	0
Paracoccus	0	0	0	0	0	0	0	0	0	0	0	0	0	0	0	0	0	0	0	0	0	0	0	0	0	0	0	0	0	0	0	0	0	0	0	0	0	0	0	0	0	0	0.244952	0	0	0	0	0	0
Paracoccus chinensis	0	0	0	0	0	0	0	0	0	0	0	0	0	0	0	0	0	0	0	0	0	0	0	0	0	0	0	0	0	0	0	0.00327504	0	0	0	0	0	0	0	0	0	0	0	0	0	0	0	0	0
Paracoccus marcusii/carotinifaciens	0	0	0	0	0	0	0	0	0	0	0	0	0	0	0	0	0	0.0205818	0	0	0	0	0	0	0	0	0	0	0	0	0	0	0	0	0	0	0	0	0	0	0	0	0	0	0	0	0	0	0
Paracoccus marinus	0	0	0	0	0	0	0	0	0	0	0	0	0	0	0	0	0	0	0	0	0	0	0	0	0	0	0	0	0	0	0	0	0	0	0	0	0	0	0	0	0	0	0.0116644	0.054839	0	0	0	0	0
Paracoccus panacisoli	0	0	0	0	0	0	0	0	0	0	0	0	0	0	0	0	0	0	0	0	0	0	0	0	0	0	0	0	0	0	0	0	0	0	0	0	0	0	0	0	0	0	0	0	0	0	0	0	0
Paracoccus yeei	0	0	0	0	0	0	0	0	0	0	0	0	0	0	0	0	0	0	0	0	0	0	0	0	0	0	0	0	0	0	0	0	0	0	0	0	0	0	0	0	0	0	0	0	0	0	0	0	0
Parageobacilllus tobii	0	0	0	0	0	0	0	0	0	0	0	0	0	0	0	0	0	0	0	0	0	0	0	0	0	0	0	0	0	0	0	0	0	0	0	0	0	0	0	0	0	0	0	0	0	0	0	0	0
Paraprevotella	0	0	0	0	0	0	0	0	0	0	0	0	0	0	0	0	0	0	0	0	0	0	0	0	0	0	0	0	0	0	0	0	0	0	0	0	0	0	0	0	0	0	0.0233287	0	0	0	0	0	0
Parasutterella	0	0	0	0	0	0	0	0	0	0	0	0	0	0	0	0	0	0	0	0	0	0	0	0	0	0	0	0	0	0	0	0	0	0	0	0	0	0	0	0	0	0	0	0	0	0	0	0	0
Parasutterella excrementihominis	0	0	0	0	0	0	0	0	0	0	0	0	0	0	0	0	0	0	0	0	0.0350598	0	0	0	0	0	0	0	0	0	0	0	0	0	0	0	0	0	0	0	0	0	0	0	0	0	0	0	0
Parcubacteria	0	0	0	0	0	0	0	0	0	0	0	0	0	0	0	0	0	0	0	0	0	0	0	0	0	0	0	0	0	0	0	0	0	0	0	0	0	0	0	0	0	0	0.033535	0	0	0	0	0	0
Parvimonas	0	0	0	0	0	0	0	0	0	0	0	0	0	0	0	0	0	0	0	0	0	0	0	0	0	0	0.0505317	0	0	0	0	0	0	0	0	0	0	0	0.0293876	0	0	0	0	0	0.312677	0	0	0	0
Parvimonas micra	0	0	0	0	0	0	0	0	0	0	0	0	0	0	0	0	0	0	0	0	0	0	0	0	0	0	0	0	0	0	0	0	0	0	0	0	0	0	0	0	0	0	0	0	0	0	0	0	0
Pediococcus acidilactici	0	0	0	0	0	0	0	0	0	0	0	0	0	0	0	0	0	0	0	0	0	0	0	0	0	0	0	0	0	0	0	0	0	0	0	0	0	0	0	0	0	0	0	0	0	0	0	0	0
Pedobacter	0	0	0	0	0	0	0	0	0	0	0	0	0	0	0	0	0	0	0	0	0	0	0	0	0	0	0	0	0	0	0	0	0	0	0	0	0	0	0	0	0	0	0.240577	0	0	0	0	0	0
Pelomonas	0	0	0	0	0	0	0	0	0	0	0	0	0	0	0	0	0	0	0	0	0	0	0	0	0	0	0	0	0	0	0	0	0	0	0	0	0	0	0	0	0	0	0	0	0	0	0	0	0
Pelomonas saccharophila	0	0	0	0	0	0	0	0	0	0	0	0	0	0	0	0	0	0	0	0	0	0	0	0	0	0	0	0	0	0	0	0	0	0	0	0	0	0	0	0	0	0	0	0	0	0	0	0	0
Peptococcus	0	0	0	0	0	0	0	0	0	0	0	0	0	0	0	0	0	0	0	0	0	0	0	0	0	0	0	0	0	0	0	0	0	0	0	0	0	0	0	0.00847063	0	0	0	0	0	0	0	0	0
Peptococcus niger	0	0	0	0	0	0	0	0	0	0	0	0.0257555	0.122699	0	0	0	0	0	0	0	0.025498	0	0	0	0	0	0.00439406	0	0	0	0	0	0.0360865	0	0	0	0	0	0.0146938	0	0	0	0	0	0	0	0	0	0
Peptoniphilaceae	0	0	0	0	0	0	0	0	0	0	0	0	0.0555069	0	0	0	0	0	0	0.0238316	0.025498	0	0	0	0	0	0	0	0	0	0	0	0.0233501	0	0	0	0	0	0.00881627	0	0	0	0	0	0	0	0	0	0
Peptoniphilus	0	0.125674	0	0	0	0	3.30826	0	0.0295867	0	2.92235	0.675366	0.543383	0.112113	0	0	0	0.720362	0.0283101	0.248908	0.497211	0	0.0461089	5.49135	0.0264504	0.0618884	1.57966	0.0186072	0	0.0366236	0.494658	0.0425755	3.15226	0.00894614	0	0	0	0	0.21159	0.139765	0	0	0.0437413	0.103585	0.118666	0	0.0772675	0.00741936	0
Peptoniphilus coxi	0	0.00992162	0	0	0	0	0	0	0	0	0.01055	0.0314789	0	0	0	0	0	0	0.021777	0	0.0159363	0	0	0	0.0264504	0.0135381	0	0	0	0	0.186134	0	0	0	0	0.0258894	0	0	0.0323263	0	0	0	0	0	0	0	0	0	0
Peptoniphilus gorbachii	0	0.0264577	0	0.861828	0	0	0	0	0	0	0	0	0.0905638	0.0313915	0	0	0	0	0	0.058255	0.0828685	0	0	0	0	0	0.00659109	0	0	0	0.0254978	0.00491256	0.101891	0	0	0	0	0	0	0.186354	0	0	0	0	0	0	0	0	0
Peptoniphilus grossensis	0	0	0	0.923387	0	0	0	0	0	0	0	0	0.0730353	0	0	0	0	0	0.0087108	1.44314	0.0669323	0	0	0.0293655	0	0	0	0	0	0	0.0331472	0.0163752	0.456388	0	0	0	0	0	0	0	0	0	0	0	0	0	0	0	0
Peptoniphilus harei	0	0	0	0.0671554	0	0	0.0220341	0	0	0	0.0386834	0	0	0.0627831	0	0	0	0.0548847	0	0.0979743	0	0	0	0.0985842	0	0	0	0	0	0.0226718	0.0229481	0	0.0360865	0	0	0	0	0	0.0528976	0.0423531	0	0	0.0145804	0.0589012	0	0	0	0	0
Peptoniphilus lacrimalis	0	0	0	0.0279814	0	0	0.591772	0	0	0	0	0.0343407	0.411919	0	0	0	0	0	0	0.169469	0.758566	0	0	0.0104877	0	0	0.298796	0.14188	0	0.0156958	0.094342	0	0.745081	0	0	0	0	0	0	0.0169413	0	0	0.0247868	0.129989	1.62177	0	0	0	0
Peptoniphilus massiliensis	0	0	0	0	0	0	0	0	0	0	0	0.137363	0.137306	0	0	0	0	0	0	0	0	0	0	0	0	0	0.00659109	0.0232591	0	0	0	0.00491256	0	0	0	0	0	0	0	0	0	0	0	0	0	0	0	0	0
Peptoniphilus obesi	0	0	0	0	0	0	0	0	0	0	0	0	0	0	0	0	0	0	0	0	0	0	0	0	0	0	0	0	0	0	0	0	0	0	0	0	0	0	0	0	0	0	0	0	0	0	0	0	0
Peptostreptococcaceae	0	0	0	0	0	0	0	0	0	0	0	0	0	0	0	0	0	0	0	0	0	0	0	0	0	0	0	0	0	0	0	0	0	0	0	0	0	0	0	0	0	0	0	0	0	0	0	0	0
Peptostreptococcus	0	0	0	0	0	0	0	0	0	0	0	0	0	0	0	0	0	0	0	0.132398	0.159363	0	0	0	0	0	0	0	0	0	0	0	0	0	0	0	0	0	0	0	0	0	0	0	0	0	0	0	0
Peptostreptococcus anaerobius	0	0	0	0	0	0	0	0	0.0236693	0	0	0	0.151914	0	0	0	0	0.0137212	0.0087108	0	0	0	0	0	0.0198378	0	0.00439406	0	0	0	0	0	0	0	0	0	0	0	0.0382038	0.0931769	0	0	0.00291609	0	0.0263703	0	2.54528	0	0
Peptostreptococcus stomatis	0	0	0	0	0	0	0	0	0	0	0	0	0	0	0	0	0	0	0	0	0	0	0	0	0	0	0	0	0	0	0	0	0	0	0	0	0	0	0	0.0127059	0	0	0	0	0	0	0	0	0
Peredibacter	0	0	0	0	0	0	0	0	0	0	0	0	0	0	0	0	0	0	0	0	0	0	0	0	0	0	0	0	0	0	0	0	0	0	0	0	0	0	0	0	0	0	0	0.0162486	0	0	0	0	0
Phascolarctobacterium	0	0	0	0	0	0	0	0	0	0	0	0	0	0	0	0	0	0	0	0	0	0	0	0	0	0	0	0	0	0	0	0	0	0	0	0	0	0	0	0	0	0	0	0	0	0	0	0	0
Phascolarctobacterium faecium	0	0	0	0	0	0	0	0	0	0	0	0	0	0	0	0	0	0	0	0	0	0	0	0	0	0	0	0	0	0	0	0	0	0	0	0	0	0	0	0.0254119	0	0	0	0	0	0	0	0	0
Phocaeicola	0	0	0	0	0	0	0	0	0	0	0	0	0	0	0	0	0	0	0	0	0	0	0	0	0	0	0	0	0	0	0	0	0	0	0	0	0	0	0	0	0	0	0.0349931	0	0	0	0	0	0
Phocaeicola coprocola	0	0	0	0	0	0	0	0	0	0	0	0	0	0	0	0	0	0	0	0	0	0	0	0	0	0	0	0	0	0	0	0	0	0	0	0	0	0	0	0	0	0	0	0	0	0	0	0	0
Phocaeicola dorei	0	0	0	0	0	0	0	0	0	0	0	0	0	0	0	0	0	0.212678	0	0	0.0159363	0	0	0	0	0	0	0.0511699	0	0	0	0	0	0	0	0	0	0	0	0.0423531	0	0	0	0	0	0	0	0	0
Phocaeicola massiliensis	0	0	0	0	0	0	0	0	0	0	0	0	0	0	0	0	0	0.0617453	0	0	0	0	0	0	0	0	0	0	0	0	0	0	0	0	0	0	0	0	0	0	0	0	0	0	0	0	0	0	0
Phocaeicola vulgatus	0	0	0	0.0279814	0	0	0	0	0	0	0	0	0	0	0	0	0	0.130351	0	0	0	0	0	0	0	0	0	0	0	0	0	0.00655008	0.00636821	0	0	0.0215745	0	0	0	0	0	0	0.0903988	0	0	0	0	0	0
Photobacterium	0	0	0	0	0	0	0	0	0	0	0	0	0	0	0	0	0	0	0	0	0	0	0	0	0	0	0	0	0	0	0	0	0	0	0	0	0	0	0	0	0	0	0	0	0	0	0	0	0
Planctomycetacia	0	0	0	0	0	0	0	0	0	0	0	0	0	0	0	0	0	0	0	0	0	0	0	0	0	0	0	0	0	0	0	0	0	0	0	0	0	0	0	0	0	0	0	0	0	0	0	0	0
Planococcaceae	0	0	0	0	0	0	0	0	0	0	0	0	0	0	0	0	0	0	0	0	0	0	0	0	0	0	0	0	0	0	0	0	0	0	0	0	0	0	0	0	0	0	0.0874827	0	0	0	0	0	0
Pleomorphomonas	0	0	0	0	0	0	0	0	0	0	0	0	0	0	0	0	0	0	0	0	0	0	0	0	0	0	0	0	0	0	0	0	0	0	0	0	0	0	0	0	0	0	0	0.0324972	0	0	0	0	0
Pluralibacter	0	0	0	0	0	0	0	0	0	0	0	0	0	0	0	0	0	0	0	0	0	0	0	0	0	0	0	0	0	0	0	0	0	0	0	0	0	0	0	0	0	0	0	0	0	0	0	0	0
Pontibacter	0	0	0	0	0	0	0	0	0	0	0	0	0	0	0	0	0	0	0	0	0	0	0	0	0	0	0	0	0	0	0	0	0	0	0	0	0	0	0	0	0	0	0.403878	0	0	0	0	0	0
Porphyromonadaceae	0	0	0	0	0	0	0	0	0	0	0	0	0	0	0	0	0	0	0	0	0	0	0	0	0	0	0	0	0	0	0	0	0	0	0	0	0	0	0	0	0	0	0	0	0	0	0	0	0
Porphyromonas	0	0	0	0	0	0	0	0	0	0	0.03165	0.0343407	0.265849	0	0	0	0	0.0205818	0	0.0264795	0.159363	0	0	0	0	0	0.00878812	0.00930362	0	0	0.0127489	0	0.0212274	0	0	0	0	0	0.0146938	0	0	0	0	0	0	0	0	0	0
Porphyromonas asaccharolytica	0	0	0	0	0	0	0	0	0	0	0	0	0.0613497	0	0	0	0	0	0	0	0	0	0	0	0	0	0	0	0	0	0	0.00491256	0.114628	0	0	0	0	0	0	0	0	0	0	0	0	0	0	0	0
Porphyromonas bennonis	0	0	0	0	0	0	0	0	0	0	0	0	0.0642711	0	0	0	0	0	0	0.0450152	0.0191235	0	0	0	0	0	0	0	0	0	0	0	0	0	0	0	0	0	0	0	0	0	0	0	0	0	0	0	0
Porphyromonas bennonis cluster	0	0.00992162	0	0	0	0	0	0	0	0	0	0	0	0	0	0	0	0	0	0	0	0	0	0	0	0	0	0	0	0	0	0	0	0	0	0	0	0	0	0	0	0	0	0	0	0	0	0	0
Porphyromonas catoniae	0	0	0	0	0	0	0	0	0	0	0	0	0	0	0	0	0	0	0	0	0	0	0	0	0	0	0	0	0	0	0	0	0	0	0	0	0	0	0	0	0	0	0	0	0	0	0	0	0
Porphyromonas endodontalis	0	0	0	0	0	0	0	0	0	0	0	0	0	0	0	0	0	0	0	0	0	0	0	0	0	0	0	0	0	0	0	0	0	0	0	0	0	0	0	0	0	0	0	0	0	0	0	0	0
Porphyromonas gingivalis	0	0	0	0	0	0	0	0	0	0	0	0	0	0	0	0	0	0.0205818	0	0	0	0	0	0	0	0	0	0	0	0	0	0	0	0	0	0	0	0	0	0	0	0	0	0	0	0	0	0	0
Porphyromonas somerae	0	0	0	0.565225	0	0	0	0	0	0	0	0	0	0	0	0	0	0	0.0087108	1.13332	0.529084	0	0	0	0	0	0	0	0	0	0	0	0.00636821	0	0	0	0	0	0.0822852	0	0	0	0	0	0	0	0	0	0
Porphyromonas uenonis	0	0	0	0	0	0	0.0314772	0	0	0	0	0.0314789	0	0	0	0	0	0	0.0043554	0.632861	0.184861	0	0	0	0	0	0.0109851	0	0	0	0.0382468	0	0.072173	0	0	0	0	0	0	0	0	0	0	0	0	0	0	0	0
Prevotella	0	0	0	0	0	0	0	0	0	0	0	0.669643	0.768332	0	0.0604243	0	0	0.212678	0.0261324	2.22958	0.866932	0.00366482	0.00512321	0	0.0154294	0.00967006	3.13296	0.597758	0	0.0941751	0.035697	0.0147377	0.263219	0.00894614	0	0.0345192	0	0	0.0235101	0	0	0	0	0	0	0.0405822	0	0	0
Prevotella amnii	0	0.125674	0	0	0	0	0	0	0	0	0	0	0	0	0	0	0	0	0	0	0	0	0	0	0	0	0	0	0	0	0	0	0	0	0	0	0	0	0	0	0	0	0	0	0	0	0	0	0
Prevotella baroniae	0	0	0	0	0	0	0	0	0	0	0	0	0	0	0	0	0	0	0	0	0.0063745	0	0	0	0	0	0	0	0	0	0	0	0	0	0	0	0	0	0	0	0	0	0	0	0	0	0	0	0
Prevotella bergensis	0	0	0	0	0	0	0.0346249	0	0	0	0.03165	0	0.0204499	0	0	0	0	0	0	0.145637	0.0414343	0	0	0	0	0.0154721	0	0	0	0	0	0.142464	0.148592	0	0	0	0	0	0.0146938	0	0	0	0	0	0	0	0	0	0
Prevotella bivia	0	0.0463009	0	0	0	0	3.01552	0.0181628	0.109471	0	0.0246167	0	0	0	0	0	0	2.22283	0.0413763	2.35933	1.8741	0.00732963	0.0204929	0.845307	0.0484923	0	0.896388	15.8301	0	0	0	0	0	0	0.0931858	0.0560937	0.0109333	0	0.0176325	0.656474	1.62484	0.0227566	0.0102063	0.0182797	0	0	0	0	0
Prevotella buccalis	0	0	0	0.268622	0	0	0	0	0	0	0.68575	0.0972985	0.122699	0.112113	0.179115	0	0	0	0	0.275387	0.0828685	0	0	0.509701	0.0264504	0.0386802	0	0.0302368	0	0	0.0917922	0.104801	0.288692	0	0	0	0	0	0	0	0	0	0	0	0	0	0	0	0
Prevotella copri	0	0	0	0	0	0	0	0	0	0	0	0	0	0	0	0	0	0	0	0	0	0	0	0	0	0	0	0	0	0	0	0	0	0	0	0.0302043	0	0	0	0	0	0	0	0	0	0	0	0	0
Prevotella corporis	0	0	0	0	0	0	0.100727	0	0	0	0.0140667	0.314789	1.41396	0	0	0	0.00522016	0	0	6.64372	11.2446	0	0	0	0	0	0.239476	0.0465181	0	0	0.803182	0.761446	7.24702	0	0	0.0172596	0	0	0.00881627	0	0	0.0113783	0	0	0	0	0	0	0
Prevotella denticola	0	0	0	0	0	0	0	0	0	0	0	0	0	0	0	0	0	0	0	0	0	0	0	0	0	0	0	0	0	0	0	0	0	0	0	0	0	0	0	0	0	0	0	0	0	0	0	0	0
Prevotella disiens	0	0	0	0	0	0	0	0.070381	0.0325453	0	0.03165	0	0.84721	0	0	0	0	0	0.0326655	0.100622	0.114741	0	0.0256161	2.92396	0.0551049	0.0309442	0.0351525	0.048844	0	0.0662714	0	0	0	0	0	0	0	0	0.0528976	0	0	0	0	0	5.88435	0	0	0	0
Prevotella histicola	0	0	0	0	0	0	0	0	0	0	0	0	0	0	0	0	0	0.109769	0	0	0	0	0	0	0	0	0	0	0	0	0	0	0	0	0	0	0	0	0	0	0	0	0	0	11.2206	0.0162329	0	0	0
Prevotella intermedia	0	0	0	0	0	0	0	0	0	0	0	0	0	0	0	0	0	0	0	0	0	0	0	0	0	0	0	0	0	0	0	0	0	0	0	0	0	0	0	0	0	0	0	0	0	0	0	0	0
Prevotella jejuni	0	0	0	0	0	0	0	0	0	0	0	0	0	0	0	0	0	0	0	0	0	0	0	0	0	0	0	0	0	0	0	0	0	0	0	0	0	0	0	0	0	0	0	0	0	0.0270548	0	0	0
Prevotella melaninogenica	0	0.0562225	54.2885	0.0279814	0	0	0	0.0840031	0	0	0	0	0	0	0	0	0	0.0617453	0	0	0	0	0	0	0	0	0	0	0	0	0	0	0	0	0	0	0	0	0	0	0	0	0	0	0	0	0	0	0
Prevotella melaninogenica/scopos	0	0	0	0	0	0	0	0	0	0	0	0	0	0	0	0	0	0	0	0.0105918	0	0	0	0	0	0	0	0	0	0	0	0	0	0	0	0	0	0	0	0	0	0	0	0	0	0	0	0	0
Prevotella nanceiensis	0	0	0	0	0	0	0	0	0	0	0	0	0	0	0	0	0	0	0	0	0	0	0	0	0	0	0	0	0	0	0	0	0	0	0	0	0	0	0	0	0	0	0	0	0	0	0	0	0
Prevotella oris	0	0	0	0	0	0	0	0	0	0	0	0	0	0	0	0	0	0.0686059	0	0	0	0	0	0	0	0	0	0	0	0	0	0	0	0	0	0	0	0	0	0	0	0	0	0	0	0	0	0	0
Prevotella pallens	0	0	0	0	0	0	0	0	0	0	0	0	0	0	0	0	0	0	0	0	0	0	0	0	0	0	0	0	0	0	0	0	0	0	0	0	0	0	0	0	0	0	0	0	0	0.0135274	0	0	0
Prevotella salivae	0	0	0	0	0	0	0	0	0	0	0	0	0	0	0	0	0	0	0	0	0	0	0	0	0	0	0	0	0	0	0	0	0	0	0	0	0	0	0	0	0	0	0	0	0	0	0	0	0
Prevotella timonensis	0	0.0396865	0	0	0	0	4.88841	0.0363257	0.331371	0	0.1477	0.211767	1.70026	0	0	0	0	0.150933	0.13284	16.7324	7.24462	0.00916204	0.00768482	0.253802	0.0661259	0.0135381	8.12901	0.0697772	0	0.0348797	0.958719	0.0818759	9.6627	0	0.0407688	0	0	0	0.0264488	0	0	0	0.0247868	0.0467147	4.4886	0	43.5311	0	0
Prevotellaceae	0	0	0	0	0	0	0	0	0	0	0	0	0	0	0	0	0	0	0	0	0	0	0	0	0	0	0	0	0	0	0	0	0	0	0	0	0	0	0	0	0	0	0	0	0	0	0	0	0
Prevotellamassilia	0	0	0	0	0	0	0	0	0	0	0	0	0	0	0	0	0	0.102909	0	0	0	0	0	0	0	0	0	0	0	0	0	0	0	0	0	0	0	0	0	0	0	0	0	0	0	0	0	0	0
Propionibacteriaceae	0	0	0	0	0	0	0	0	0	0	0	0	0.0233713	0	0	0	0	0	0	0	0	0	0	0	0	0	0	0	0	0	0	0	0	0	0	0	0	0	0	0	0	0	0	0	0	0	0	0	0
Propionibacterium	0	0	0	0	0	0	0	0	0	0	0	0	0.0233713	0	0	0	0	0	0	0	0	0	0	0	0	0	0	0	0	0	0	0	0	0	0	0	0	0	0	0	0	0	0	0	0	0	0	0	0
Propionibacterium lympholium	0	0.0132288	0	0	0	0	0.273852	0	0	0	0.0211	0.168842	0	0	0	0	0	0	0	0	0	0	0	0	0	0.0154721	0	0	0	0	0.221831	0	4.68276	0	0	0	0	0	0.0176325	0	0	0	0	0	0	0	0	0	0
Proteobacteria	0	0	0	0	0	0	0	0	0	0	0.01055	0	0	0	0	0	0	0.11663	0	0	0.0063745	0	0	0	0	0.0135381	0	0	0	0	0	0	0	0	0	0	0	0	0	0	0	0	0.00437413	0.0203108	0	0	0	0	0
Proteus mirabilis	0	0	0	0	0	0	0	0	0	0	0	0	0	0	0	0	0	0	0	0	0	0	0	0	0	0	0	0	0	0	0	0	0	0	0	0	0	0	0	0.0169413	0	0	0	0	0	0	0	0	0
Proteus vulgaris	0	0	0	0.0615591	0	0	0	0	0	0	0	0	0	0	0	0	0	0	0	0	0	0	0	0	0	0	0	0	0	0	0	0	0	0	0	0	0	0	0	0	0	0	0	0	0	0	0	0	0
Pseudoalteromonas	0	0	0	0	0	0	0	0	0	0	0	0	0	0	0	0	0	0	0	0	0	0	0	0	0	0	0	0	0	0	0	0	0	0	0	0	0	0	0	0	0	0	0	0	0	0	0	0	0
Pseudochrobactrum	0	0	0	0	0	0.00496032	0	0	0	0	0	0	0	0	0	0	0	0	0	0	0	0	0	0	0	0.00773605	0	0	0	0	0	0	0	0	0	0	0	0	0	0	0	0	0	0	0	0	0	0	0
Pseudoglutamicibacter albus/cuminsii	0	0	0	0	0	0	0	0	0	0	0	0	0	0	0	0	0	0	0	0	0	0	0	0	0	0	0	0	0	0	0	0	0	0	0	0	0	0	0.0176325	0	0	0	0	0	0	0	0	0	0
Pseudomonas	0	0	0	0	0	0	0	0	0.00591733	0	0	0	0	0	0	0	0	0	0	0	0	0	0	0	0	0	0	0	0	0	0	0	0	0	0	0	0	0	0	0	0	0	0	0	0	0	0	0	0
Pseudomonas aeruginosa	0	0	0	0	0	0	0	0	0	0	0	0	0	0	0	0	0	0.0480241	0	0	0	0	0	0	0	0	0	0	0	0	0	0	0	0	0	0	0	0	0	0	0	0	0.0597798	0.282319	0	0.140685	0	0	0
Pseudomonas alcaligenes	0	0	0	0	0	0	0	0	0	0	0	0	0.0116857	0	0	0	0	0	0	0	0	0	0	0	0	0	0	0	0	0	0	0	0	0	0	0	0	0	0	0	0	0	0.0408253	0	0	0	0	0	0
Pseudomonas asplenii putida T	0	0	0	0	0	0	0	0	0	0	0	0	0	0	0	0	0	0.212678	0	0	0.00956175	0	0	0	0	0	0	0	0	0	0	0	0	0	0	0	0	0	0	0.0254119	0	0	0	0	0	0	0	0	0
Pseudomonas mendocina PC12 cluster	0	0	0	0	0	0	0	0	0	0	0	0	0	0	0	0	0	0	0	0	0	0	0	0	0	0	0	0	0	0	0	0	0	0	0	0	0	0	0	0	0	0	0	0	0	0	0	0	0
Pseudomonas panipatensis	0	0	0	0	0	0	0	0	0	0	0	0	0	0	0	0	0	0	0	0	0	0	0	0	0	0	0	0	0	0	0	0	0	0	0	0	0	0	0	0	0	0	0	0	0	0	0	0	0
Pseudomonas plecoglossicida/montelii/putida F1	0	0	0	0	0	0	0	0	0	0	0	0	0	0	0	0	0	0	0	0	0	0	0	0	0	0	0	0	0	0	0	0	0	0	0	0	0	0	0	0	0	0	0	0	0	0	0	0	0
Pseudomonas pseudoalcaligenes/oleovorans	0	0	0	0	0	0	0	0.00908141	0	0	0	0	0	0	0	0	0	0	0	0	0	0	0	0	0	0	0	0	0	0	0.00764935	0	0	0	0	0	0	0	0	0	0	0	0	0.052808	0	0	0	0	0
Pseudomonas pseudoalcaligenes/oleovorans/mendocina ymp	0	0	0	0	0	0	0	0	0	0	0	0	0	0	0	0	0	0	0	0	0	0	0	0	0	0	0	0	0	0	0	0	0	0	0	0	0	0	0	0	0	0	0.0145804	0	0	0	0	0	0
Pseudomonas tolaasii/poae	0	0	0	0	0	0	0	0	0	0	0	0	0	0	0	0	0	0.109769	0	0.0158877	0	0	0.012808	0.00839014	0	0.0580203	0	0	0	0.0261597	0	0.0147377	0.0169819	0	0	0.0258894	0	0	0	0	0	0	0.274112	0.107647	0.00941797	0	0	0.0166936	0.0155812
Pseudonocardia	0	0	0	0	0	0	0	0	0	0	0	0	0	0	0	0	0	0	0	0	0	0	0	0	0	0	0	0	0	0	0	0	0	0	0	0	0	0	0	0	0	0	0.109353	0	0	0	0	0	0
Pseudoramibacter	0	0	0	0	0	0	0	0	0	0	0	0	0.30967	0	0	0	0	0	0	0	0	0	0	0	0	0	0	0	0	0	0.0382468	0	0	0	0	0	0	0	0	0	0	0	0	0	0	0	0	0	0
Pseudoxanthomonas	0	0	0	0	0	0	0	0	0	0	0	0	0	0	0	0	0	0	0	0	0	0	0	0	0	0	0	0	0	0	0	0	0	0	0	0	0	0	0	0	0	0	0.00874827	0.0365594	0	0	0	0	0
Pseudoxanthomonas taiwanensis	0	0	0	0	0	0	0	0	0	0	0	0	0	0	0	0	0	0	0	0	0	0	0	0	0	0	0	0	0	0	0	0	0	0	0	0	0	0	0	0	0	0	0.00874827	0.0304661	0	0	0	0	0
Psychrobacter	0	0	0	0	0	0	0	0	0	0	0	0	0	0	0	0	0	0	0	0	0	0	0	0	0	0	0	0	0	0	0	0	0	0	0	0	0	0	0	0	0	0	0	0	0	0	0	0	0
Pyramidobacter piscolens	0	0	0	0	0	0	0	0	0	0	0	0	0.0116857	0	0	0	0	0	0	0	0	0	0	0	0	0	0	0	0	0	0	0	0	0	0	0	0	0	0	0	0	0	0	0	0	0	0	0	0
Ralstonia solanacearum	0	0	0	0	0	0	0	0	0	0	0	0	0	0	0	0	0	0	0	0	0	0	0	0	0	0	0	0	0	0	0	0	0	0	0	0	0	0	0	0	0	0	0	0	0	0	0	0	0
Raoultibacter	0	0	0	0	0	0	0	0	0	0	0	0	0	0	0	0	0	0	0	0	0	0	0	0	0	0	0	0	0	0	0	0	0	0	0	0	0	0	0	0	0	0	0	0	0	0	0	0	0
Rarimicrobium	0	0	0	0	0	0	0	0	0	0	0	0	0.210342	0	0	0	0	0	0	0	0	0	0	0	0	0	0	0	0	0	0	0	0	0	0	0	0	0	0	0	0	0	0	0	0	0	0	0	0
Rhizobiaceae	0	0	0	0	0	0	0	0	0	0	0	0	0	0	0	0	0	0	0	0.00794386	0	0	0	0	0	0	0	0	0	0	0	0	0	0	0	0	0	0	0	0	0	0	0	0	0	0	0	0	0
Rhizobiales	0	0	0	0	0	0	0	0	0	0	0	0	0	0	0	0	0	0	0	0	0	0	0	0	0	0	0	0	0	0	0	0	0	0	0	0	0	0	0	0	0	0	0	0	0	0	0	0	0
Rhizobium	0	0	0	0	0	0	0	0	0	0	0	0	0	0	0	0	0	0	0	0	0	0	0	0	0	0	0	0	0	0	0	0	0	0	0	0	0	0	0	0	0	0	0	0	0	0	0	0	0
Rhizobium daejeonense	0	0	0	0	0	0	0	0	0	0	0	0	0	0	0	0	0	0	0	0	0	0	0	0	0	0	0	0	0	0	0	0	0	0	0	0	0	0	0	0	0	0	0.0670701	0.444806	0	0	0	0	0
Rhizobium metallidurans	0	0	0	0	0	0	0	0	0	0	0	0	0	0	0	0	0	0	0	0	0	0	0	0	0	0	0	0	0	0	0	0	0	0	0	0.0086298	0	0	0	0	0	0	0.00874827	0.0731187	0	0	0	0	0
Rhizobium radiobacter	0	0	0	0	0	0	0	0	0	0	0	0	0	0	0	0	0	0	0	0	0	0	0	0	0	0	0	0	0	0	0	0	0	0	0	0	0	0	0	0	0	0	0.177881	0.761653	0	0	0	0	0
Rhizomicrobium	0	0	0	0	0	0	0	0	0	0	0	0	0	0	0.0194221	0	0	0	0	0	0	0	0	0	0	0	0	0	0	0.00523195	0	0	0	0	0	0	0	0	0	0	0	0	0	0	0	0	0	0	0
Rhodobacteraceae	0	0	0	0	0	0	0	0	0	0	0	0	0	0	0	0	0	0	0	0	0	0	0	0	0	0	0	0	0	0	0	0	0	0	0	0	0	0	0	0	0	0	0	0	0	0	0	0	0
Rhodococcus	0	0	0	0	0	0	0	0	0	0	0	0	0	0	0	0	0	0	0	0	0	0	0	0	0	0	0	0	0	0	0	0.00327504	0	0	0	0	0	0	0	0	0	0	0	0	0	0	0	0	0
Rhodococcus qingshengii/jialingiae	0	0	0	0	0	0	0	0	0	0	0	0	0	0	0	0	0	0	0	0	0	0	0	0	0	0.00580203	0	0	0	0	0	0	0	0	0	0	0	0	0	0	0	0	0.0670701	0	0	0	0	0	0
Rhodocyclales	0	0	0	0	0	0	0	0	0.0147933	0	0	0.0572344	1.77914	0	0	0	0	0	0	0	0	0	0	0	0	0	0	0	0	0	0.0509957	0.0147377	0	0	0	0	0	0	0	0	0	0	0	0	0	0	0	0	0
Rhodomicrobium	0	0	0	0	0	0	0	0	0	0	0	0	0	0	0	0	0	0	0	0	0	0	0	0	0	0.0116041	0	0	0	0	0	0	0	0	0	0	0	0	0	0	0	0	0	0	0	0	0	0	0
Rhodospirillales	0	0	0	0	0	0	0	0	0	0	0	0	0	0	0	0	0	0	0	0	0	0	0	0	0	0	0	0	0	0	0	0	0	0	0	0	0	0	0	0.0465885	0	0	0.0437413	0	0	0	0	0	0
Rickettsiaceae	0	0	0	0	0	0	0	0	0	0	0	0	0	0	0	0	0	0	0	0	0	0	0	0	0	0	0	0	0	0	0	0	0	0	0	0	0	0	0	0	0	0	0	0	0	0	0	0	0
Romboutsia	0	0	0	0	0	0	0	0	0	0	0	0	0	0	0	0	0	0.0274424	0	0	0	0	0	0	0	0	0	0	0	0	0	0	0	0	0	0	0	0	0	0	0	0	0	0	0	0	0	0	0
Roseburia faecis	0	0	0	0	0	0	0	0	0	0	0	0	0	0	0	0	0	0	0	0	0	0	0	0	0	0	0	0	0	0	0	0	0	0	0	0	0	0	0.00587751	0	0	0	0	0	0	0	0	0	0
Roseburia intestinalis	0	0	0	0	0	0	0	0	0	0	0	0	0	0	0	0	0	0	0	0	0	0	0	0	0	0	0	0	0	0	0	0	0	0	0	0	0	0	0	0	0	0	0	0	0	0	0	0	0
Rosenbergiella	0	0	0	0	0	0	0	0	0	0	0	0	0	0	0	0	0	0	0	0	0	0	0	0	0	0	0	0	0	0	0	0	0	0	0	0	0	0	0	0	0	0	0	0	0	0	0	0	0
Roseomonas	0	0	0	0	0	0	0	0	0	0	0	0	0	0	0	0	0	0	0	0	0	0	0	0	0	0	0	0	0	0	0	0	0	0	0	0	0	0	0	0	0	0	0	0	0	0	0	0	0
Roseomonas mucosa/massiliae	0	0	0	0	0	0	0	0	0	0	0	0	0	0	0	0	0	0	0	0	0	0	0	0	0	0	0	0	0	0	0	0	0	0	0	0	0	0	0	0	0	0	0	0	0	0	0	0	0
Rothia	0	0	0	0	0	0	0	0	0	0	0	0	0	0	0	0	0	0	0	0	0	0	0	0	0	0	0	0	0	0	0	0	0	0	0	0	0	0	0	0	0	0	0	0	0	0	0	0	0
Rothia dentocariosa	0	0	0	0	0	0	0	0	0	0	0	0	0	0	0	0	0	0	0	0	0	0	0	0	0	0	0	0	0	0.00523195	0	0	0	0	0	0	0	0	0	0.0169413	0	0	0	0	0	0	0	0	0
Rothia mucilaginosa	0	0	0	0	0	0	0	0	0	0	0	0	0	0	0	0	0	0.0205818	0	0	0	0	0	0	0	0	0	0	0	0	0	0	0	0	0	0	0	0	0	0	0	0	0	0	0	0	0	0	0
Rubellimicrobium	0	0	0	0	0	0.00744048	0	0	0	0	0	0	0	0	0	0	0	0.0960483	0	0	0	0	0	0	0	0	0	0	0	0	0	0	0	0	0	0	0	0	0	0	0	0	0	0	0	0	0	0	0
Ruminococcaceae	0	0.00661441	0	0	0	0	0	0	0	0	0	0	0.213263	0	0	0	0	0.0480241	0	0	0.076494	0	0	0.00629261	0	0.00386802	0	0	0	0	0.0203983	0.00655008	0	0	0	0.0151022	0	0	0.00587751	0.0211766	0	0	0	0	0	0	0	0	0
Ruminococcus	0	0	0	0	0	0	0	0	0	0	0	0	0	0	0	0	0	0.0205818	0	0	0	0	0	0	0	0	0	0	0	0	0	0.00327504	0	0	0	0	0	0	0	0	0	0	0	0	0	0	0	0	0
Ruminococcus bicirculans	0	0	0	0	0	0	0	0	0	0	0	0	0	0	0	0	0	0	0	0	0	0	0	0	0	0	0	0	0	0	0	0	0	0	0	0	0	0	0	0	0	0	0	0	0	0	0	0	0
Ruminococcus bromii	0	0	0	0	0	0	0	0	0	0	0	0	0	0	0	0	0	0	0	0	0	0	0	0	0	0	0	0	0	0	0	0	0	0	0	0	0	0	0	0	0	0	0	0	0.00376719	0	0	0	0
Ruminococcus2	0	0	0	0	0	0	0	0	0	0	0	0	0	0	0	0	0	0	0	0	0	0	0	0	0	0	0	0	0	0	0	0	0	0	0	0	0	0	0	0	0	0	0	0	0	0	0	0	0
Ruminococcus2 R torques ATCC 27756	0	0	0	0	0	0	0	0	0	0	0	0	0	0	0	0	0	0	0	0	0	0	0	0	0	0	0	0	0	0	0	0.00327504	0	0	0	0	0	0	0	0.0423531	0	0	0	0	0	0	0	0	0
Ruthenibacterium	0	0	0	0	0	0	0	0	0	0	0	0	0	0	0	0	0	0	0	0	0	0	0	0	0	0	0	0	0	0	0	0	0	0	0	0	0	0	0	0	0	0	0	0	0	0	0	0	0
Saccharibacteria genera incertae sedis	0	0	0	0	0	0	0.0125909	0	0	0	0	0	0	0	0.0129481	0	0	0	0	0	0	0	0	0	0	0	0	0	0	0	0	0	0	0	0	0	0	0	0	0	0	0	0	0	0	0	0	0	0
Saccharopolyspora	0	0	0	0	0	0	0	0	0	0	0	0	0.0116857	0	0	0	0	0	0	0	0	0	0	0	0	0	0	0	0	0	0	0	0	0	0	0	0	0	0	0	0	0	0	0	0	0	0	0	0
Schaalia	0	0	0	0	0	0	0	0	0	0	0	0	0.0175285	0	0	0	0	0	0	0	0	0	0	0	0	0	0	0.00697772	0	0	0	0	0.0254728	0	0	0	0	0	0	0.0211766	0	0	0	0.0101554	0	0	0	0	0
Schaalia lingnae	0	0	0	0	0	0	0	0	0	0	0	0	0	0	0	0	0	0	0	0	0	0	0	0	0	0	0	0	0	0	0	0	0	0	0	0	0	0	0	0	0	0	0	0	0	0	0	0	0
Schaalia odontolyticus	0	0	0	0	0	0	0	0	0	0	0	0	0	0	0	0	0	0	0	0	0	0	0	0	0	0	0	0	0	0	0	0	0	0	0	0	0	0	0	0	0	0	0	0	0	0.0189384	0	0	0
Schaalia turicensis	0	0	0	0.190274	0	0	0	0	0	0	0	0	0	0	0	0	0	0	0	0	0	0	0	0	0	0	0.0285614	0	0	0	0	0	0	0	0	0	0	0	0	0	0	0	0	0	0	0	0	0	0
Schlegelella thermodepolymerans	0	0	0	0	0	0	0	0	0	0	0	0	0	0	0	0	0	0	0	0	0	0	0	0	0	0	0	0	0	0	0	0	0	0	0	0	0	0	0	0	0	0	0	0	0	0	0	0	0
Sediminibacterium	0	0	0	0	0	0	0	0	0	0	0	0	0	0	0	0	0	0.0274424	0	0	0	0	0	0	0	0	0	0	0	0	0	0	0	0	0	0	0	0	0	0	0	0	0.0758183	0	0	0	0	0	0
Selenomonas	0	0	0	0	0	0	0	0	0	0	0	0	0	0	0	0	0	0	0	0	0	0	0	0	0	0	0	0	0	0	0	0	0	0	0	0	0	0	0	0	0	0	0	0	0	0	0	0	0
Selenomonas sputigena	0	0	0	0	0	0	0	0	0	0	0	0	0	0	0	0	0	0	0	0	0	0	0	0	0	0.00773605	0	0	0	0	0	0	0	0	0	0	0	0	0	0	0	0	0	0	0	0	0	0	0
Sellimonas	0	0	0	0	0	0	0	0	0	0	0	0	0	0	0	0	0	0	0	0	0	0	0	0	0	0	0	0	0	0	0	0	0	0	0	0	0	0	0	0	0	0	0	0	0	0	0	0	0
Senegalimassilia	0	0	0	0	0	0	0	0	0	0	0	0	0	0	0	0	0	0.0480241	0	0	0	0	0	0	0	0	0	0	0	0	0	0	0	0	0	0	0	0	0	0	0	0	0	0	0	0	0	0	0
Serratia	0	0	0	0	0	0	0	0	0	0	0	0	0	0	0	0	0	0.0823271	0	0	0	0	0	0	0	0	0	0	0	0	0	0	0	0	0	0	0	0	0	0	0	0	0	0	0	0	0	0	0
Shuttleworthia	0	0	0	0	0	0	0	0	0	0	0	0	0	0	0	0	0	0	0	0	0	0	0	0	0	0	0	0	0	0	0	0	0	0	0	0	0	0	0	0	0	0	0	0	0	0	0	0	0
Slackia exigua	0	0	0	0	0	0	0.0314772	0	0	0	0	0.00858516	0	0	0	0	0	0	0	0.0132398	0.0159363	0	0	0	0	0.00580203	0.0241673	0	0	0	0.0127489	0	0	0	0	0	0	0	0	0	0	0	0	0	0	0	0.0704497	0	0
Sneathia	0	0	0	0	0	0	0	0	0	0	0	0	0	0	0	0	0	0	0	0	0	0	0	0	0	0	0	0	0	0	0	0	0	0	0	0	0	0	0.0176325	0	0	0	0	0	0	0	0	0	0
Sneathia amnionii	0	0.287727	0	0	0	0	0	0	0	0	0	0	0	0	0	0	0	0	0	0	0	0	0	0	0	0	0	0	0	0	0	0	0	0	0.0116482	0	0	0	0	0	0	0	0	0	0	0	0	0	0
Sneathia sanguinegens	0	0.393558	0	0	0	0	0	0	0	0	0	0	0	0	0	0	0	0	0	0	0	0	0	0	0	0	0	0	0	0	0	0	0	0	0	0	0	0	0	0	0	0	0	0	0	0	0	0	0
Solobacterium moorei	0	0	0	0	0	0	0	0	0	0	0	0	0	0	0	0	0	0	0	0	0	0	0	0	0	0	0	0	0	0	0	0	0	0	0	0	0	0	0	0	0	0	0	0	0	0	0	0	0
Sphaerotilus	0	0	0	0	0	0	0	0	0	0	0	0	0	0	0	0	0	0	0	0	0	0	0	0	0	0	0	0	0	0	0	0	0	0	0	0	0	0	0	0	0	0	0	0	0	0	0	0	0
Sphingobacterium	0	0	0	0	0	0	0	0	0	0	0	0	0	0	0	0	0	0	0	0	0	0	0	0	0	0	0	0	0	0	0	0	0	0	0	0	0	0	0	0	0	0	0	0	0	0	0	0	0
Sphingobium	0	0	0	0	0	0	0	0	0	0	0	0	0	0	0	0	0	0	0	0	0	0	0	0	0	0	0	0	0	0.0174398	0	0	0	0	0	0	0	0	0	0	0	0	0	0	0	0	0	0	0
Sphingobium yanoikuyae	0	0	0	0	0	0	0	0	0	0	0	0	0	0	0	0	0	0.0411636	0	0	0	0	0	0	0	0	0	0	0	0	0	0	0	0	0	0	0	0	0	0	0	0	0.0597798	0	0	0	0	0	0
Sphingomonadaceae	0	0	0	0	0	0	0	0	0	0	0	0	0	0	0	0	0	0	0	0	0	0	0	0	0	0	0	0	0	0	0	0	0	0	0	0	0	0	0	0	0	0	0.109353	0	0	0	0	0	0
Sphingomonas	0	0	0	0	0	0	0	0	0	0	0	0	0	0	0	0	0	0	0	0	0	0	0	0	0	0	0	0	0	0	0	0	0	0	0	0	0	0	0	0	0	0	0.0247868	0	0	0	0	0	0
Sphingomonas mathurensis	0	0	0	0	0	0	0	0	0	0	0	0	0	0	0	0	0	0	0	0	0	0	0	0	0	0	0	0	0	0	0	0	0	0	0	0	0	0	0	0.0127059	0	0	0	0	0	0	0	0	0
Sphingomonas melonis/aquatilis	0	0	0	0	0	0	0	0	0	0	0	0	0	0	0	0	0	0	0	0	0	0	0	0	0	0	0	0	0	0	0	0	0	0	0	0	0	0	0	0	0.0180538	0	0	0	0	0	0	0	0
Sphingomonas pituitosa/azotifigens	0	0	0	0	0	0	0	0	0	0	0	0	0.0116857	0	0	0	0	0	0	0	0	0	0	0	0	0	0	0	0	0	0	0	0	0	0	0	0	0	0	0	0	0	0.0102063	0.026404	0	0	0	0	0
Sporocytophaga	0	0	0	0	0	0	0	0	0	0	0	0	0	0	0	0	0	0	0	0	0	0	0	0	0	0	0	0	0	0.00523195	0	0	0	0	0	0.0043149	0	0	0	0	0	0	0.123934	0.119833	0	0	0	0	0
Sporosarcina	0	0	0	0	0	0	0	0	0	0	0	0	0	0	0	0	0	0	0	0	0	0	0	0	0	0	0	0	0	0	0	0	0	0	0	0	0	0	0	0	0	0	0	0.0142175	0	0	0	0	0
Staphylococcus	0	0	0	0	0	0	0	0	0	0	0	0	0	0	0	0	0	0	0	0	0	0	0	0	0	0.00580203	0	0	0	0	0	0	0	0	0	0	0	0	0	0	0	0	0	0	0	0	0	0	0
Staphylococcus aureus	0	0	0	0	0.0127464	0	0	0	0	0	0	0	0	0	0	0	0	0.507684	0.0108885	0.0476632	0	0	0	0	0	0	0	0	0	0	0	0	0	0	0.0203844	0	0	0	0	0.0338825	0	0	0	0	0	0	0.0204532	0	0.322753
Staphylococcus capitis/epidermidis/caprae	0	0.152131	0	0	0	0	0	0	0	0	0	0	0	0	0	0	0	0.795829	0	0	0	0	0	0	0	0	0	0	0	0	0	0	0	0	0	0	0	0	0	0	0	0	0	0	0	0	0	0	0
Staphylococcus carnosus/piscifermentans	0	0	0	0	0	0	0	0	0	0	0	0	0	0	0	0	0	0	0	0	0	0	0.012808	0	0	0	0	0	0	0	0	0	0	0	0	0	0	0	0	0	0	0	0	0	0	0	0	0	0
Staphylococcus epidermidis	0	2.74829	0	0.212659	0	0.014881	0.0314772	0	0.0473387	0	1.68448	7.66083	0	0.394637	0.0712143	0	0	8.99424	0	0.248908	0.175299	0.0256537	0.0409857	0.0209754	0	0.139249	0.158186	0.104666	0	2.27241	0.548204	1.12661	0.0212274	0	0.0291206	0.0776682	0	0	0	0	0	0	0.032077	0.0304661	0.0169523	0	0	0.0222581	0.0155812
Staphylococcus haemolyticus/devriesei	0	0	0	0.0895405	0	0	0	0	0	0	0	0	0.035057	0	0	0	0	0	0	0.341586	0.436653	0	0	0.654431	0	0.0290102	0	0.0302368	0	0.19707	0.489559	0.307854	0.0191046	0	0	0.0280469	0	0	0	0.110118	0	0	1.99023	0.389966	0.0150688	0	0	0	0
Staphylococcus hominis	0	0.271191	0	0	0.0127464	0	0.0188863	0.0590292	0.609485	0	1.07962	3.79178	0.0262927	2.15705	0.0410022	0	0	0.939901	0	0	0	0	0	0	0.0242462	0.947666	0.0175762	0.0465181	0	0.176142	0.23968	0	0	0	0	0	0	0	0	0	0	0	0.0189546	0.0426526	0	0	0	0	0.0111294
Staphylococcus lugdunensis	0	0.0330721	0	0	0	0	0	0	0	0	0	0	0	0	0	0	0	0	0	0	0	0	0	0	0	0	0	0	0	0	0	0	0	0	0	0	0	0	0	0	0	0	0.0277029	0.0203108	0	0	0	0	0
Staphylococcus pasteuri/warneri	0	0	0	0	0	0	0	0	0	0	0	0	0	0	0	0	0	0.185236	0	0	0	0	0	0	0	0	0	0	0	0	0	0	0	0	0	0	0	0	0	0	0	0	0	0	0	0	0	0	0
Staphylococcus petrasii	0	0.254655	0	0	0	0	0	0	0	0	0	0	0	0	0	0	0	0	0	0	0	0	0	0	0	0	0	0	0	0	0	0	0	0	0	0	0	0	0	0	0	0	0	0	0	0	0	0	0
Staphylococcus pettenkoferi	0	0	0	0	0	0	0	0	0	0	0	0	0	0	0	0	0	0	0	0	0	0	0	0	0	0	0	0	0	0	0	0	0	0	0	0	0	0	0	0	0	0	0	0	0	0	0	0	0
Staphylococcus saprophyticus/xylosus	0	0	0	0	0	0	0	0	0	0	0	0	0	0	0	0	0	0	0	0	0	0	0	0	0	0	0	0	0	0	0	0	0	0	0	0	0	0	0	0	0	0	0	0	0	0	0	0	0
Staphylococcus simulans	0	0	0	0	0	0	0	0	0	0	0	0	0	0	0	0	0	0	0	0	0	0	0	0	0	0	0	0	0	0	0	0	0	0	0	0	0	0	0	0	0	0	0	0	0	0	0	0	0
Steroidobacteraceae	0	0	0	0	0	0	0	0	0	0	0	0	0.0262927	0	0	0	0	0	0	0	0	0	0	0	0	0.00773605	0	0	0	0.0435996	0	0	0	0	0	0	0	0	0	0	0	0	0	0	0	0	0	0	0
Streptococcus	0	0	0	0	0	0	0	0	0	0	0	0	0	0	0	0	0	0.150933	0	0	0	0.00732963	0	0	0	0	0	0	0	0	0	0	0	0	0	0	0	0	0	0	0	0	0.0291609	0	0	0.0297603	30.6547	0	0.345012
Streptococcus agalactiae	0	0	0	0	0	0.0223214	0	0	0	0	0	0	0	0	0	0	0	0	0	0	0	0	0	0	0	0	0	0	0	0	0	0	0	0	0	0	0	0	0.11755	0	0	0	0	0	1.58034	0	0	0	0
Streptococcus alactolyticus	0	0	0	0	0	0	0	0	0	0	0	0	0	0	0	0	0	0	0	0	0	0	0	0	0	0	0	0	0	0	0	0	0	0	0	0	0	0	0	0	0	0	0	0	0	0	0.0340886	0	0
Streptococcus anginosus	0	3.96534	0	0.0335777	0	0	0.535113	0.0272442	0.142016	0.0107302	0	0	0.108092	0	0	0.00808952	0.0156605	0	0	0	0.025498	0	0.0102464	0	0.0198378	0	3.45153	0.00465181	0	0.0122079	0.614498	0.0180127	2.96122	0	0.0203844	0.768052	0	0	0.0558364	0	0.0677018	0	0.0116644	0.0487458	0.118666	0	0	0	0.393981
Streptococcus cristatus	0	0	0	0	0	0	0	0	0	0	0	0	0	0	0	0	0	0	0	0	0	0	0	0	0	0	0	0	0	0	0	0	0	0	0	0	0	0	0	0	0	0	0	0	0	0	0	0	0
Streptococcus dysgalactiae	0	0	0	0	0	0	0	0	0	0	0	0	0	0	0	0	0	0	0	0	0	0	0	0	0	0	0	0	0	0	0	0	0	0	0	0	0	0	0	0	0	0	0	0	0	0	0	0	0
Streptococcus gallolyticus	0	0	0	0	0	0	0	0	0	0	0	0	0	0	0	0	0	0	0	0	0	0	0	0	0	0	0	0	0	0	0	0	0	0	0	0	0	0	0	0	0	0	0	0	0	0	0	0	0
Streptococcus gordonii	0	0	0	0	0	0	0	0	0	0	0	0	0	0	0	0	0	0.034303	0	0	0	0	0	0	0	0	0	0	0	0	0	0	0	0	0	0	0	0	0	0	0	0	0	0	0	0	0	0	0
Streptococcus intermedius/constellatus	0	0	0	0	0	0	0	0	0	0	0	0	0	0	0	0	0	0	0	0	0	0	0	0	0	0	0	0	0	0	0	0	0	0	0	0	0	0	0	0	0	0	0	0	0	0	0	0	0
Streptococcus lutetiensis/infantarius	0	0	0	0	0	0	0	0	0	0	0	0	0	0	0	0	0	0	0	0	0	0	0	0	0	0	0	0	0	0	0	0	0	0	0	0	0	0	0	0	0	0	0	0	0	0	0	0	0
Streptococcus mitis bv 2D009	0	0	0	0	0	0	0	0	0	0	0	0	0	0	0	0	0	0	0	0	0	0	0	0	0	0.00580203	0	0	0	0	0	0	0	0	0	0	0	0	0	0	0	0	0	0	0	0	0	0	0
Streptococcus mitis ChDC B553	0	0	0	0	0	0	0	0	0	0	0	0	0	0	0	0	0	0	0	0	0	0	0	0	0	0	0	0	0	0	0	0	0	0	0	0	0	0	0	0	0	0	0	0	0	0	0	0	0
Streptococcus mitis NJ9705/oralis ATCC9811	0	0	0	0	0	0	0	0	0	0	0	0	0	0	0	0	0	0	0	0	0	0	0	0	0	0	0	0	0	0	0	0	0	0	0	0	0	0	0	0	0	0	0.0772764	0	0	0	0	0	0
Streptococcus mitis T/pneumoniae JJA	0	0.466316	0	0.117522	0	0	0	0	0	0	0	0	0.0146071	0	0.0194221	0	0	0.2264	0	0	0	0	0	0	0	0	0	0	0	0.0104639	0	0	0	0	0	0	0	0	0	0	0	0	0.0583218	0	0	0	0	0	0
Streptococcus mutans	0	0	0	0	0	0	0	0	0	0	0	0	0	0	0	0	0	0	0	0	0	0	0	0	0	0	0	0	0	0	0	0	0	0	0	0	0	0	0	0.0381178	0	0	0	0	0	0	0	0	0
Streptococcus oralis ATCC700233	0	0	0	0	0	0	0	0	0	0	0	0	0	0	0	0	0	0	0	0	0	0	0	0	0	0	0	0	0	0	0	0	0	0	0	0	0	0	0	0	0	0	0	0	0	0	0	0	0
Streptococcus oralis type	0	0	0	0	0	0	0	0	0	0	0	0	0	0	0	0	0	0	0	0	0	0	0	0	0	0	0	0	0	0	0	0	0	0	0	0	0	0	0	0	0	0	0	0	0	0	0	0	0
Streptococcus parasanguinis	0	0	0	0	0	0	0	0	0	0	0	0	0	0	0	0	0	0.0548847	0	0	0.012749	0	0	0.00419507	0	0	0	0	0	0	0	0	0	0	0	0	0	0	0	0	0	0	0	0	0	0	0	0	0
Streptococcus parasanguinis ChDC B671	0	0	0	0	0	0	0	0	0	0	0	0	0	0	0	0	0	0	0	0	0	0	0	0	0	0	0	0	0	0	0	0	0	0	0	0	0	0	0	0	0	0	0	0	0	0	0	0	0
Streptococcus salivarius/vestibularis	0	0	0	0	0	0	0	0	0	0	0	0	0	0	0	0	0	0.0686059	0	0	0.0191235	0	0	0	0	0	0	0	0	0	0	0.0147377	0	0	0.0174723	0.0755108	0	0	0	0	0	0	0	0.0487458	0	0.0135274	0	0	0
Streptococcus sanguinis	0	0	0	0	0	0	0	0	0	0	0	0	0	0	0	0	0	0	0	0	0	0	0	0	0	0	0	0	0	0	0	0	0	0	0	0	0	0	0	0	0	0	0.0597798	0	0	0	0	0	0.0267106
Streptococcus sobrinus	0	0	0	0	0	0	0	0	0	0	0	0	0	0	0	0	0	0	0	0	0	0	0	0	0	0	0	0	0	0	0	0	0	0	0	0	0	0	0	0	0	0	0	0	0	0	0	0	0
Streptococcus tigurinus	0	0.466316	0	0	0	0	0	0	0	0	0	0	0	0	0	0	0	0	0	0	0	0	0	0	0	0	0	0	0	0	0	0	0	0	0	0	0	0	0.0264488	0	0	0	0	0	0	0	0	0	0
Streptococcus urinalis	0	0	0	0	0	0	0	0	0	0	0	0	0	0	0	0	0	0	0	0	0	0	0	0	0	0	0	0	0	0	0	0	0	0	0	0	0	0	0	0	0	0	0	0	0	0	0	0	0
Subdivision3 genera incertae sedis	0	0	0	0	0	0	0	0	0	0	0	0	0	0	0	0	0	0	0	0	0.00956175	0	0	0	0	0	0	0	0	0	0	0	0	0	0	0	0	0	0	0	0	0	0	0	0	0	0	0	0
Succiniclasticum	0	0	0	0	0	0	0	0	0	0	0	0	0.157756	0	0	0	0	0	0	0	0	0	0	0	0	0	0	0	0	0	0	0	0	0	0	0	0	0	0	0	0	0	0	0	0	0	0	0	0
Sulfuritalea	0	0	0	0	0	0	0	0	0	0	0	0.0143086	0	0	0	0	0	0	0	0	0	0	0	0	0	0	0	0	0	0	0	0	0	0	0	0	0	0	0	0	0	0	0	0	0	0	0	0	0
Sutterella	0	0	0	0	0	0	0	0	0	0	0	0	0.00584283	0	0	0	0	0	0.0326655	1.66292	0.436653	0	0	0.0293655	0.022042	0.0174061	0.0175762	0.00930362	0	0	0	0	0.685644	0	0	0	0	0	0.00587751	0	0	0	0	0	0	0	0	0	0
Sutterella wadsworthensis	0	0	0	0	0	0	0	0	0	0	0	0	0	0	0	0	0	0.0754665	0	0	0	0	0	0	0	0	0	0	0	0	0	0	0	0	0	0	0	0	0	0	0	0	0	0	0	0	0	0	0
Sutterellaceae	0	0	0	0	0	0	0.0157386	0	0	0	0	0	0	0	0	0	0	0	0	0	0	0	0	0	0	0	0	0	0	0	0	0	0	0	0	0	0	0	0	0	0	0	0	0	0	0	0	0	0
Syntrophococcus	0	0	0	0	0	0	0	0	0	0	0	0	0	0	0	0	0	0	0	0	0	0	0	0	0	0	0	0	0	0	0	0	0	0	0	0	0	0	0	0	0	0	0	0	0	0	0	0	0
Tepidimonas	0	0	0	0	0	0	0	0	0	0	0	0	0	0	0	0	0	0	0	0	0	0	0	0	0	0	0	0	0	0	0	0	0	0	0	0	0	0	0	0	0	0	0	0	0	0	0	0	0
Tepidimonas arfidensis	0	0	0	0	0	0	0	0	0	0	0	0	0	0	0	0	0	0	0	0	0	0	0	0	0	0.00967006	0	0	0	0	0	0	0	0	0	0	0	0	0	0	0	0	0	0	0	0	0	0	0
Tepidiphilus margaritifer	0	0	0	0	0	0	0	0	0	0	0	0	0	0	0.00863204	0	0	0	0	0	0	0	0	0	0	0	0	0	0	0	0	0	0	0	0	0	0	0	0	0	0	0	0	0	0	0	0	0	0
Terrimonas	0	0	0	0	0	0	0	0	0	0	0	0	0	0	0	0	0	0	0	0	0	0	0	0	0	0	0	0	0	0	0	0	0	0	0	0	0	0	0	0	0	0	0	0	0	0	0	0	0
Terrisporobacter	0	0	0	0	0	0	0	0	0	0	0	0	0	0	0	0	0	0	0	0	0	0	0	0	0	0	0	0	0	0	0	0	0	0	0	0	0	0	0	0	0	0	0	0	0	0	0	0	0
Tessaracoccus massiliensis	0	0	0	0	0	0	0	0	0	0	0	0	0	0	0	0	0	0	0	0	0	0	0	0	0	0	0	0	0	0	0	0	0	0	0	0	0	0	0	0	0	0	0	0	0	0	0	0	0
Tessarococcus	0	0	0	0	0	0	0	0	0	0	0	0	0	0	0	0	0	0	0	0	0	0	0	0	0	0	0	0	0	0	0	0	0	0	0	0	0	0	0.00587751	0	0	0	0	0	0	0	0	0	0
Thermoleophilia	0	0	0	0	0	0	0	0	0	0	0	0	0	0	0	0	0	0	0	0	0	0	0	0	0	0	0	0	0	0	0	0	0	0	0	0	0	0	0	0	0	0	0	0	0	0	0	0	0
Thermomonas	0	0	0	0	0	0	0	0	0	0	0	0	0	0	0	0	0	0	0	0	0	0	0	0	0	0	0	0	0	0	0	0	0	0	0	0	0	0	0	0	0	0	0.0247868	0.121865	0	0	0	0	0
Treponema	0	0	0	0	0	0	0	0	0	0	0	0	0	0	0	0	0	0	0	0	0	0	0	0	0	0	0	0	0	0	0	0	0	0	0	0	0	0	0	0	0	0	0	0	0	0	0	0	0
Treponema refringens	0	0	0	0	0	0	0	0	0	0	0	0	0	0	0	0	0	0	0	0	0	0	0	0	0	0	0	0	0	0	0	0	0	0	0	0	0	0	0	0	0	0	0	0	0	0	0	0	0
Treponema socranskii	0	0	0	0	0	0	0	0	0	0	0	0	0	0	0	0	0	0	0	0	0	0	0	0	0	0	0	0	0	0	0	0	0	0	0	0	0	0	0	0	0	0	0	0	0	0	0	0	0
Tropheryma whipplei	0	0	0	0	0	0	0	0	0	0	0	0	0	0	0	0	0	0.0205818	0	0	0	0	0	0	0	0	0	0	0	0	0	0	0	0	0	0	0	0	0	0	0	0	0	0	0	0	0	0	0
Turicibacter	0	0	0	0	0	0	0	0	0	0	0	0	0	0	0	0	0	0	0	0	0	0	0	0	0	0	0	0	0	0	0	0	0	0	0	0	0	0	0	0	0	0	0.00437413	0.0121865	0	0	0	0	0
Undibacterium oligocarboniphilum	0	0	0	0	0	0	0	0	0	0	0	0	0	0	0	0	0	0	0	0	0	0	0	0	0	0	0	0	0	0	0	0	0	0	0	0	0	0	0	0	0	0	0	0	0	0	0	0	0
Ureaplasma	0	0	0.00522985	0	0	0	0	0	0	0	0	0	0	0	0	0	0	0	0	0	0	0	0	0	0	0	0	0	0	0	0	0	0	0	0	0	0	0	0	0	0	0	0	0	0	0	0	0	0
Ureaplasma parvum	0	0	0	2.19374	0.0233685	1.46825	4.16444	0.138492	4.14213	0	42.5693	40.1013	1.47824	94.4706	99.0785	0.0134825	0.0600318	22.441	0.119774	1.71058	0.149801	2.22088	2.58466	2.27583	0.324017	34.3867	0	0	0	0	0	0	0	26.9726	99.2108	0	0.0109333	0.0250069	0	0	0	0	0	0.00406215	0	0	0	0.0408065	0
Ureaplasma urealyticum	0	0.132288	7.99121	4.09088	0	0	0	0	0	0	0	0	0	0	0	0	0	0	0	0	0	0	0	0	0	0	0.0131822	0	0.428102	60.4831	0.035697	90.3878	48.0184	0	0	0.0409916	0	0	0.0235101	0	0	0	0	0	0	0	0	0	0
Vampirovibrio	0	0	0	0	0	0	0	0	0	0	0	0	0	0	0	0	0	0	0	0	0	0	0	0	0	0	0	0	0	0	0	0	0	0	0	0	0	0	0.00587751	0	0	0	0.0772764	0	0	0	0	0	0
Varibaculum	0	0	0	0	0	0	0.267556	0	0	0	0	0	0.0993281	0	0	0	0	0	0	0.00794386	0.0159363	0	0	0	0	0.0270762	0	0	0	0	0.0280476	0	0.275956	0	0	0	0	0	0	0	0	0	0.27557	0.414339	0	0	0	0	0
Varibaculum cambriense	0	0	0	0	0	0	0	0	0	0	0.01055	0.0200321	0	0	0	0	0	0	0	0	0	0	0	0	0	0	0.0681079	0	0	0	0	0	0	0	0	0	0	0	0	0	0	0	0.0379092	0.0751498	0	0	0	0	0
Variovorax boronicumulans/soli	0	0	0	0	0	0	0	0	0	0	0	0	0	0	0	0	0	0	0	0	0	0	0	0	0	0	0	0	0	0	0	0	0	0	0	0	0	0	0	0	0	0	0	0	0	0	0	0	0
Veillonella	0	0	0	0	0	0	0	0	0	0	0	0	0	0	0	0	0	0	0	0	0	0	0	0	0	0	0	0	0	0	0	0	0	0	0	0	0	0	0	0	0	0	0	0	0	0	0	0	0
Veillonella atypica	0	0	0	0	0	0	0	0	0.079884	0	0	0	0	0	0	0	0	0	0	0	0	0	0	0	0	0	0	0	0	0	0	0	0	0	0	0	0	0	0	0	0.0315942	0	0	0	0	0.0216439	0	0	0
Veillonella montpellierensis	0	0.125674	0	0	0	0	0.547704	0	0	0	0	0	0	0	0	0	0	0	0	0	0	0	0	0	0	0	0	0	0	0	0	0	0	0	0	0	0	0	0	0	0	0	0	0	0	0	0	0	0
Veillonella parvula/dispar	0	0	0	0	0	0	0	0	0	0	0	0	0	0	0	0	0	0.0411636	0	0	0.0159363	0	0	0	0	0	0	0	0	0	0	0	0.927636	0	0	0	0	0	0	0	0	0	0	0	0	0	0.40679	0.0278226	0.0534212
Veillonella ratti	0	0	0	0	0	0	0	0	0.008876	0	0	0	0	0	0	0	0	0.322448	0	0.0317755	0	0	0	0	0	0.0251421	0	0	0	0	0	0	0	0	0	0	0	0	0	0	0	0	0	0	0	0	0	0	0
Veillonella tobetsuensis	0	0	0	0	0	0	0	0	0	0	0	0	0	0	0	0	0	0	0	0	0	0	0	0	0	0	0	0	0	0	0	0	0	0	0	0	0	0	0	0	0	0	0	0	0	0	0	0	0
Vulcaniibacterium	0	0	0	0	0	0	0	0	0	0	0	0	0	0	0	0	0	0	0	0	0	0	0	0	0	0	0	0	0	0	0	0	0	0	0	0	0	0	0	0	0	0	0	0	0	0	0	0	0
Weeksella virosa	0	0	0	0	0	0	0	0	0	0	0	0	0	0	0	0	0	0	0	0	0	0	0	0	0	0	0	0	0	0	0	0	0	0	0	0	0	0	0	0	0	0	0.00437413	0.0101554	0	0	0	0	0
Weissella confusa/koreensis/cibara	0	0	0	0	0	0	0	0	0	0	0	0	0	0	0	0	0	0	0	0	0	0	0	0	0	0	0	0	0	0	0	0	0	0	0	0	0	0	0	0	0	0	0.00729022	0.0324972	0	0	0	0	0
Winkia neuli	0	0.0760657	0	0.0839443	0	0	0.239227	0	0.035504	0	0.11605	0.231799	0	0	0	0	0	0	0	0	0	0	0	0	0	0.00967006	0.0549257	0	0	0	0	0	0	0	0	0	0	0	0	0	0.0180538	0	12.1688	5.06144	0	0	0.0499966	0	0
Xanthobacter	0	0	0	0	0	0	0	0	0	0	0	0	0	0	0	0	0	0	0	0	0	0	0	0	0	0	0	0	0	0	0	0	0	0	0	0	0	0	0	0	0	0	0	0	0	0	0	0	0
[truncated: 118 more columns]
