# Supplementary material for: Vaginal and neonatal microbiota in pregnant women with preterm premature rupture of membranes and consecutive early onset neonatal sepsis
Source: BMC Med. 2023 Mar 13;21:92. doi: 10.1186/s12916-023-02805-x (PMC10009945; doi:10.1186/s12916-023-02805-x)
Supplement: Supplementary file 13 — Additional file 13: Table S9. Pairwise PERMANOVA based on the Bray-Curtis similarities of vaginal and neonatal communities calculated from standardized relative species abundance data. [file 12916_2023_2805_MOESM13_ESM.xlsx]

## Sheet: Supplementary Table 9
Supplementary Table 9. Pairwise PERMANOVA based on the Bray-Curtis similarities of vaginal and neonatal communities calculated from standardized relative species abundance data.
Level	Pairwise comparison	Pseudo-F	p
None	UC, PH	0.973	0.468
None	UC, RE	0.85	0.813
None	UC, V2	1.76	0.001*
None	PH, RE	0.68	0.989
None	PH, V2	1.797	0.002*
None	RE, V2	1.97	0.001*
Early delivery	UC, PH	0.815	0.866
Early delivery	UC, RE	0.829	0.845
Early delivery	UC, V2	1.494	0.026*
Early delivery	PH, RE	0.732	0.982
Early delivery	PH, V2	1.772	0.005*
Early delivery	RE, V2	1.804	0.003*
Late delivery	UC, PH	0.866	0.766
Late delivery	UC, RE	0.813	0.88
Late delivery	UC, V2	1.343	0.040*
Late delivery	PH, RE	0.597	1
Late delivery	PH, V2	1.192	0.134
Late delivery	RE, V2	1.445	0.022*
Umbilical cord blood	early, late	1.054	0.305
Pharyngeal swab	early, late	1.137	0.153
Rectal swab	early, late	1.184	0.111
V2	early, late	2.096	0.001*
V2, vaginal swab prior to birth; PH, pharyngeal swab; RE, rectal swab; UC, umbilical cord blood. early delivery, delivery after <2 days antibiotic treatment; late delivery, delivery after >2 days antibiotic treatment. * Significant value.
