# Supplementary material for: Vaginal and neonatal microbiota in pregnant women with preterm premature rupture of membranes and consecutive early onset neonatal sepsis
Source: BMC Med. 2023 Mar 13;21:92. doi: 10.1186/s12916-023-02805-x (PMC10009945; doi:10.1186/s12916-023-02805-x)
Supplement: Supplementary file 14 — Additional file 14: Table S10. Taxa differentially distributed between the vaginal microbiota at time of delivery and neonatal microbiota. The difference in distribution was tested by the Kruskal-Wallis test with Benjamini-Hochberg corrections for multiple comparisons. Groups of samples were considered significantly different if the adjusted p-value was <0.05. Only taxa fulfilling this criterion are shown. Pairwise comparisons were performed between vaginal samples taken at birth (V2), meconium (ME), umbilical cord blood (UC), pharyngeal swab (PH) and rectal swab (RE) samples. p-Values were corrected by the Dunn`s test. [file 12916_2023_2805_MOESM14_ESM.xlsx]

## Sheet: Supplementary Table 10
Supplementary Table 10. Taxa differentially distributed between the vaginal microbiota at time of delivery and neonatal microbiota
organism	comparison	main test (Kruskal-Wallis)	pairwise test
Acinetobacter junii		0.000173616
	Acinetobacter junii ME - Acinetobacter junii UC		0.389336
	Acinetobacter junii ME - Acinetobacter junii PH		0.414747
	Acinetobacter junii UC - Acinetobacter junii PH		0.359816
	Acinetobacter junii ME - Acinetobacter junii RE		0.217444
	Acinetobacter junii UC - Acinetobacter junii RE		0.339654
	Acinetobacter junii PH - Acinetobacter junii RE		0.160178
	Acinetobacter junii ME - Acinetobacter junii V2		0.000456528
	Acinetobacter junii UC - Acinetobacter junii V2		0.000621176
	Acinetobacter junii PH - Acinetobacter junii V2		0.00132244
	Acinetobacter junii RE - Acinetobacter junii V2		6.69668e-06
Actinobacteria		0.000195671
	Actinobacteria ME - Actinobacteria UC		0.00444913
	Actinobacteria ME - Actinobacteria PH		0.0036162
	Actinobacteria UC - Actinobacteria PH		0.495171
	Actinobacteria ME - Actinobacteria RE		0.0512498
	Actinobacteria UC - Actinobacteria RE		0.136011
	Actinobacteria PH - Actinobacteria RE		0.129791
	Actinobacteria ME - Actinobacteria V2		2.12042e-06
	Actinobacteria UC - Actinobacteria V2		0.103031
	Actinobacteria PH - Actinobacteria V2		0.0873369
	Actinobacteria RE - Actinobacteria V2		0.00463283
Actinobaculum massiliense		0.00661436
	Actinobaculum massiliense ME - Actinobaculum massiliense UC		0.506971
	Actinobaculum massiliense ME - Actinobaculum massiliense PH		0.416551
	Actinobaculum massiliense UC - Actinobaculum massiliense PH		0.48536
	Actinobaculum massiliense ME - Actinobaculum massiliense RE		0.5
	Actinobaculum massiliense UC - Actinobaculum massiliense RE		0.426441
	Actinobaculum massiliense PH - Actinobaculum massiliense RE		0.367646
	Actinobaculum massiliense ME - Actinobaculum massiliense V2		0.00141552
	Actinobaculum massiliense UC - Actinobaculum massiliense V2		0.0154989
	Actinobaculum massiliense PH - Actinobaculum massiliense V2		0.00552409
	Actinobaculum massiliense RE - Actinobaculum massiliense V2		0.000872921
Agathobacter rectale		0.0306853
	Agathobacter rectale ME - Agathobacter rectale UC		0.116526
	Agathobacter rectale ME - Agathobacter rectale PH		0.0315163
	Agathobacter rectale UC - Agathobacter rectale PH		0.351997
	Agathobacter rectale ME - Agathobacter rectale RE		0.0251456
	Agathobacter rectale UC - Agathobacter rectale RE		0.349335
	Agathobacter rectale PH - Agathobacter rectale RE		0.454474
	Agathobacter rectale ME - Agathobacter rectale V2		0.00162853
	Agathobacter rectale UC - Agathobacter rectale V2		0.150812
	Agathobacter rectale PH - Agathobacter rectale V2		0.256728
	Agathobacter rectale RE - Agathobacter rectale V2		0.241673
Alistipes onderdonkii		0.0209541
	Alistipes onderdonkii ME - Alistipes onderdonkii UC		0.00916155
	Alistipes onderdonkii ME - Alistipes onderdonkii PH		0.0103833
	Alistipes onderdonkii UC - Alistipes onderdonkii PH		0.48489
	Alistipes onderdonkii ME - Alistipes onderdonkii RE		0.142348
	Alistipes onderdonkii UC - Alistipes onderdonkii RE		0.106672
	Alistipes onderdonkii PH - Alistipes onderdonkii RE		0.0935153
	Alistipes onderdonkii ME - Alistipes onderdonkii V2		0.00668192
	Alistipes onderdonkii UC - Alistipes onderdonkii V2		0.493213
	Alistipes onderdonkii PH - Alistipes onderdonkii V2		0.542782
	Alistipes onderdonkii RE - Alistipes onderdonkii V2		0.0805644
Anaerobutyricum		0.0242404
	Anaerobutyricum ME - Anaerobutyricum UC		0.403479
	Anaerobutyricum ME - Anaerobutyricum PH		0.0410182
	Anaerobutyricum UC - Anaerobutyricum PH		0.117952
	Anaerobutyricum ME - Anaerobutyricum RE		0.0103912
	Anaerobutyricum UC - Anaerobutyricum RE		0.0364409
	Anaerobutyricum PH - Anaerobutyricum RE		0.282631
	Anaerobutyricum ME - Anaerobutyricum V2		0.010774
	Anaerobutyricum UC - Anaerobutyricum V2		0.0332307
	Anaerobutyricum PH - Anaerobutyricum V2		0.274344
	Anaerobutyricum RE - Anaerobutyricum V2		0.462134
Anaerococcus		4.03505e-06
	Anaerococcus ME - Anaerococcus UC		0.0234221
	Anaerococcus ME - Anaerococcus PH		0.102066
	Anaerococcus UC - Anaerococcus PH		0.228154
	Anaerococcus ME - Anaerococcus RE		0.271578
	Anaerococcus UC - Anaerococcus RE		0.07351
	Anaerococcus PH - Anaerococcus RE		0.217079
	Anaerococcus ME - Anaerococcus V2		2.11225e-07
	Anaerococcus UC - Anaerococcus V2		0.0159823
	Anaerococcus PH - Anaerococcus V2		0.000256303
	Anaerococcus RE - Anaerococcus V2		4.42715e-06
Anaerococcus hydrogenalis/senegalensis		2.81056e-06
	Anaerococcus hydrogenalis/senegalensis ME - Anaerococcus hydrogenalis/senegalensis UC		0.514521
	Anaerococcus hydrogenalis/senegalensis ME - Anaerococcus hydrogenalis/senegalensis PH		0.46011
	Anaerococcus hydrogenalis/senegalensis UC - Anaerococcus hydrogenalis/senegalensis PH		0.421852
	Anaerococcus hydrogenalis/senegalensis ME - Anaerococcus hydrogenalis/senegalensis RE		0.484665
	Anaerococcus hydrogenalis/senegalensis UC - Anaerococcus hydrogenalis/senegalensis RE		0.468053
	Anaerococcus hydrogenalis/senegalensis PH - Anaerococcus hydrogenalis/senegalensis RE		0.407641
	Anaerococcus hydrogenalis/senegalensis ME - Anaerococcus hydrogenalis/senegalensis V2		1.34636e-06
	Anaerococcus hydrogenalis/senegalensis UC - Anaerococcus hydrogenalis/senegalensis V2		4.4362e-05
	Anaerococcus hydrogenalis/senegalensis PH - Anaerococcus hydrogenalis/senegalensis V2		4.42786e-05
	Anaerococcus hydrogenalis/senegalensis RE - Anaerococcus hydrogenalis/senegalensis V2		1.24362e-06
Anaerococcus lactolyticus		0.00276528
	Anaerococcus lactolyticus ME - Anaerococcus lactolyticus UC		0.406436
	Anaerococcus lactolyticus ME - Anaerococcus lactolyticus PH		0.434365
	Anaerococcus lactolyticus UC - Anaerococcus lactolyticus PH		0.354204
	Anaerococcus lactolyticus ME - Anaerococcus lactolyticus RE		0.387537
	Anaerococcus lactolyticus UC - Anaerococcus lactolyticus RE		0.325369
	Anaerococcus lactolyticus PH - Anaerococcus lactolyticus RE		0.374995
	Anaerococcus lactolyticus ME - Anaerococcus lactolyticus V2		0.000788382
	Anaerococcus lactolyticus UC - Anaerococcus lactolyticus V2		0.000645909
	Anaerococcus lactolyticus PH - Anaerococcus lactolyticus V2		0.00199413
	Anaerococcus lactolyticus RE - Anaerococcus lactolyticus V2		0.00365222
Anaerococcus murdochii		0.00178559
	Anaerococcus murdochii ME - Anaerococcus murdochii UC		0.126112
	Anaerococcus murdochii ME - Anaerococcus murdochii PH		0.5
	Anaerococcus murdochii UC - Anaerococcus murdochii PH		0.114087
	Anaerococcus murdochii ME - Anaerococcus murdochii RE		0.161005
	Anaerococcus murdochii UC - Anaerococcus murdochii RE		0.365266
	Anaerococcus murdochii PH - Anaerococcus murdochii RE		0.151082
	Anaerococcus murdochii ME - Anaerococcus murdochii V2		0.000226001
	Anaerococcus murdochii UC - Anaerococcus murdochii V2		0.0551968
	Anaerococcus murdochii PH - Anaerococcus murdochii V2		0.000213039
	Anaerococcus murdochii RE - Anaerococcus murdochii V2		0.00906271
Anaerococcus obesiensis		1.62633e-06
	Anaerococcus obesiensis ME - Anaerococcus obesiensis UC		0.25979
	Anaerococcus obesiensis ME - Anaerococcus obesiensis PH		0.353422
	Anaerococcus obesiensis UC - Anaerococcus obesiensis PH		0.160639
	Anaerococcus obesiensis ME - Anaerococcus obesiensis RE		0.351855
	Anaerococcus obesiensis UC - Anaerococcus obesiensis RE		0.159039
	Anaerococcus obesiensis PH - Anaerococcus obesiensis RE		0.463405
	Anaerococcus obesiensis ME - Anaerococcus obesiensis V2		3.33567e-06
	Anaerococcus obesiensis UC - Anaerococcus obesiensis V2		0.00152616
	Anaerococcus obesiensis PH - Anaerococcus obesiensis V2		1.04113e-06
	Anaerococcus obesiensis RE - Anaerococcus obesiensis V2		6.72329e-07
Anaerococcus octavius		0.00661436
	Anaerococcus octavius ME - Anaerococcus octavius UC		0.100505
	Anaerococcus octavius ME - Anaerococcus octavius PH		0.309708
	Anaerococcus octavius UC - Anaerococcus octavius PH		0.194981
	Anaerococcus octavius ME - Anaerococcus octavius RE		0.167948
	Anaerococcus octavius UC - Anaerococcus octavius RE		0.303821
	Anaerococcus octavius PH - Anaerococcus octavius RE		0.287414
	Anaerococcus octavius ME - Anaerococcus octavius V2		0.000330491
	Anaerococcus octavius UC - Anaerococcus octavius V2		0.0868728
	Anaerococcus octavius PH - Anaerococcus octavius V2		0.00411132
	Anaerococcus octavius RE - Anaerococcus octavius V2		0.0144115
Bacteria		0.0174413
	Bacteria ME - Bacteria UC		0.240108
	Bacteria ME - Bacteria PH		0.105518
	Bacteria UC - Bacteria PH		0.0349358
	Bacteria ME - Bacteria RE		0.271829
	Bacteria UC - Bacteria RE		0.157864
	Bacteria PH - Bacteria RE		0.195156
	Bacteria ME - Bacteria V2		0.00669532
	Bacteria UC - Bacteria V2		0.00307673
	Bacteria PH - Bacteria V2		0.15341
	Bacteria RE - Bacteria V2		0.0323818
Bacteroides ovatus		0.0164138
	Bacteroides ovatus ME - Bacteroides ovatus UC		0.00540539
	Bacteroides ovatus ME - Bacteroides ovatus PH		0.006329
	Bacteroides ovatus UC - Bacteroides ovatus PH		0.473142
	Bacteroides ovatus ME - Bacteroides ovatus RE		0.00248309
	Bacteroides ovatus UC - Bacteroides ovatus RE		0.436227
	Bacteroides ovatus PH - Bacteroides ovatus RE		0.438105
	Bacteroides ovatus ME - Bacteroides ovatus V2		0.0201512
	Bacteroides ovatus UC - Bacteroides ovatus V2		0.311885
	Bacteroides ovatus PH - Bacteroides ovatus V2		0.318119
	Bacteroides ovatus RE - Bacteroides ovatus V2		0.235427
Bifidobacterium longum		0.0343348
	Bifidobacterium longum ME - Bifidobacterium longum UC		0.00955706
	Bifidobacterium longum ME - Bifidobacterium longum PH		0.00829567
	Bifidobacterium longum UC - Bifidobacterium longum PH		0.459965
	Bifidobacterium longum ME - Bifidobacterium longum RE		0.0133545
	Bifidobacterium longum UC - Bifidobacterium longum RE		0.435172
	Bifidobacterium longum PH - Bifidobacterium longum RE		0.424728
	Bifidobacterium longum ME - Bifidobacterium longum V2		0.0520897
	Bifidobacterium longum UC - Bifidobacterium longum V2		0.253497
	Bifidobacterium longum PH - Bifidobacterium longum V2		0.21229
	Bifidobacterium longum RE - Bifidobacterium longum V2		0.286915
Bradyrhizobiaceae		0.0495387
	Bradyrhizobiaceae ME - Bradyrhizobiaceae UC		0.347377
	Bradyrhizobiaceae ME - Bradyrhizobiaceae PH		0.334997
	Bradyrhizobiaceae UC - Bradyrhizobiaceae PH		0.480678
	Bradyrhizobiaceae ME - Bradyrhizobiaceae RE		0.44248
	Bradyrhizobiaceae UC - Bradyrhizobiaceae RE		0.34117
	Bradyrhizobiaceae PH - Bradyrhizobiaceae RE		0.333773
	Bradyrhizobiaceae ME - Bradyrhizobiaceae V2		0.00772719
	Bradyrhizobiaceae UC - Bradyrhizobiaceae V2		0.0584098
	Bradyrhizobiaceae PH - Bradyrhizobiaceae V2		0.0767873
	Bradyrhizobiaceae RE - Bradyrhizobiaceae V2		0.0109969
Campylobacter hominis		0.0242404
	Campylobacter hominis ME - Campylobacter hominis UC		0.483093
	Campylobacter hominis ME - Campylobacter hominis PH		0.588911
	Campylobacter hominis UC - Campylobacter hominis PH		0.638257
	Campylobacter hominis ME - Campylobacter hominis RE		0.485867
	Campylobacter hominis UC - Campylobacter hominis RE		0.5475
	Campylobacter hominis PH - Campylobacter hominis RE		0.53905
	Campylobacter hominis ME - Campylobacter hominis V2		0.00818586
	Campylobacter hominis UC - Campylobacter hominis V2		0.013649
	Campylobacter hominis PH - Campylobacter hominis V2		0.00725275
	Campylobacter hominis RE - Campylobacter hominis V2		0.00705168
Campylobacter ureolyticus		0.000216152
	Campylobacter ureolyticus ME - Campylobacter ureolyticus UC		0.475975
	Campylobacter ureolyticus ME - Campylobacter ureolyticus PH		0.27629
	Campylobacter ureolyticus UC - Campylobacter ureolyticus PH		0.255163
	Campylobacter ureolyticus ME - Campylobacter ureolyticus RE		0.393115
	Campylobacter ureolyticus UC - Campylobacter ureolyticus RE		0.435166
	Campylobacter ureolyticus PH - Campylobacter ureolyticus RE		0.34038
	Campylobacter ureolyticus ME - Campylobacter ureolyticus V2		4.84787e-05
	Campylobacter ureolyticus UC - Campylobacter ureolyticus V2		0.000141198
	Campylobacter ureolyticus PH - Campylobacter ureolyticus V2		0.00203773
	Campylobacter ureolyticus RE - Campylobacter ureolyticus V2		0.00017639
Cloacibacterium rupense		0.0317942
	Cloacibacterium rupense ME - Cloacibacterium rupense UC		0.00447035
	Cloacibacterium rupense ME - Cloacibacterium rupense PH		0.459027
	Cloacibacterium rupense UC - Cloacibacterium rupense PH		0.00461928
	Cloacibacterium rupense ME - Cloacibacterium rupense RE		0.502301
	Cloacibacterium rupense UC - Cloacibacterium rupense RE		0.00717098
	Cloacibacterium rupense PH - Cloacibacterium rupense RE		0.490633
	Cloacibacterium rupense ME - Cloacibacterium rupense V2		0.188982
	Cloacibacterium rupense UC - Cloacibacterium rupense V2		0.0473019
	Cloacibacterium rupense PH - Cloacibacterium rupense V2		0.161729
	Cloacibacterium rupense RE - Cloacibacterium rupense V2		0.176132
Corynebacterium amycolatum		0.0424985
	Corynebacterium amycolatum ME - Corynebacterium amycolatum UC		0.24178
	Corynebacterium amycolatum ME - Corynebacterium amycolatum PH		0.411178
	Corynebacterium amycolatum UC - Corynebacterium amycolatum PH		0.332057
	Corynebacterium amycolatum ME - Corynebacterium amycolatum RE		0.370777
	Corynebacterium amycolatum UC - Corynebacterium amycolatum RE		0.347475
	Corynebacterium amycolatum PH - Corynebacterium amycolatum RE		0.383852
	Corynebacterium amycolatum ME - Corynebacterium amycolatum V2		0.00665737
	Corynebacterium amycolatum UC - Corynebacterium amycolatum V2		0.132432
	Corynebacterium amycolatum PH - Corynebacterium amycolatum V2		0.0147749
	Corynebacterium amycolatum RE - Corynebacterium amycolatum V2		0.020554
Corynebacterium genitalium		0.0205444
	Corynebacterium genitalium ME - Corynebacterium genitalium UC		0.012928
	Corynebacterium genitalium ME - Corynebacterium genitalium PH		0.438959
	Corynebacterium genitalium UC - Corynebacterium genitalium PH		0.0130187
	Corynebacterium genitalium ME - Corynebacterium genitalium RE		0.331703
	Corynebacterium genitalium UC - Corynebacterium genitalium RE		0.0190515
	Corynebacterium genitalium PH - Corynebacterium genitalium RE		0.361081
	Corynebacterium genitalium ME - Corynebacterium genitalium V2		0.0190946
	Corynebacterium genitalium UC - Corynebacterium genitalium V2		0.281513
	Corynebacterium genitalium PH - Corynebacterium genitalium V2		0.0226792
	Corynebacterium genitalium RE - Corynebacterium genitalium V2		0.0535611
Corynebacterium pyruviciproducens		0.00178559
	Corynebacterium pyruviciproducens ME - Corynebacterium pyruviciproducens UC		0.44138
	Corynebacterium pyruviciproducens ME - Corynebacterium pyruviciproducens PH		0.537554
	Corynebacterium pyruviciproducens UC - Corynebacterium pyruviciproducens PH		0.483413
	Corynebacterium pyruviciproducens ME - Corynebacterium pyruviciproducens RE		0.536377
	Corynebacterium pyruviciproducens UC - Corynebacterium pyruviciproducens RE		0.486527
	Corynebacterium pyruviciproducens PH - Corynebacterium pyruviciproducens RE		0.619721
	Corynebacterium pyruviciproducens ME - Corynebacterium pyruviciproducens V2		0.000491059
	Corynebacterium pyruviciproducens UC - Corynebacterium pyruviciproducens V2		0.00312336
	Corynebacterium pyruviciproducens PH - Corynebacterium pyruviciproducens V2		0.00171891
	Corynebacterium pyruviciproducens RE - Corynebacterium pyruviciproducens V2		0.000260394
Corynebacterium thomsenii		0.039059
	Corynebacterium thomsenii ME - Corynebacterium thomsenii UC		0.451105
	Corynebacterium thomsenii ME - Corynebacterium thomsenii PH		0.415037
	Corynebacterium thomsenii UC - Corynebacterium thomsenii PH		0.448177
	Corynebacterium thomsenii ME - Corynebacterium thomsenii RE		0.450488
	Corynebacterium thomsenii UC - Corynebacterium thomsenii RE		0.425128
	Corynebacterium thomsenii PH - Corynebacterium thomsenii RE		0.371988
	Corynebacterium thomsenii ME - Corynebacterium thomsenii V2		0.0106746
	Corynebacterium thomsenii UC - Corynebacterium thomsenii V2		0.029971
	Corynebacterium thomsenii PH - Corynebacterium thomsenii V2		0.00697628
	Corynebacterium thomsenii RE - Corynebacterium thomsenii V2		0.0335751
Corynebacterium tuberculostearicum/pseudogenitalium		0.00853359
	Corynebacterium tuberculostearicum/pseudogenitalium ME - Corynebacterium tuberculostearicum/pseudogenitalium UC		0.001409
	Corynebacterium tuberculostearicum/pseudogenitalium ME - Corynebacterium tuberculostearicum/pseudogenitalium PH		0.116834
	Corynebacterium tuberculostearicum/pseudogenitalium UC - Corynebacterium tuberculostearicum/pseudogenitalium PH		0.0270327
	Corynebacterium tuberculostearicum/pseudogenitalium ME - Corynebacterium tuberculostearicum/pseudogenitalium RE		0.107746
	Corynebacterium tuberculostearicum/pseudogenitalium UC - Corynebacterium tuberculostearicum/pseudogenitalium RE		0.0282738
	Corynebacterium tuberculostearicum/pseudogenitalium PH - Corynebacterium tuberculostearicum/pseudogenitalium RE		0.477366
	Corynebacterium tuberculostearicum/pseudogenitalium ME - Corynebacterium tuberculostearicum/pseudogenitalium V2		0.00301625
	Corynebacterium tuberculostearicum/pseudogenitalium UC - Corynebacterium tuberculostearicum/pseudogenitalium V2		0.216288
	Corynebacterium tuberculostearicum/pseudogenitalium PH - Corynebacterium tuberculostearicum/pseudogenitalium V2		0.0747665
	Corynebacterium tuberculostearicum/pseudogenitalium RE - Corynebacterium tuberculostearicum/pseudogenitalium V2		0.0726208
Cupriavidus basiliensis/necator		0.0149534
	Cupriavidus basiliensis/necator ME - Cupriavidus basiliensis/necator UC		0.0829788
	Cupriavidus basiliensis/necator ME - Cupriavidus basiliensis/necator PH		0.0885599
	Cupriavidus basiliensis/necator UC - Cupriavidus basiliensis/necator PH		0.499652
	Cupriavidus basiliensis/necator ME - Cupriavidus basiliensis/necator RE		0.121163
	Cupriavidus basiliensis/necator UC - Cupriavidus basiliensis/necator RE		0.375813
	Cupriavidus basiliensis/necator PH - Cupriavidus basiliensis/necator RE		0.405262
	Cupriavidus basiliensis/necator ME - Cupriavidus basiliensis/necator V2		0.000359763
	Cupriavidus basiliensis/necator UC - Cupriavidus basiliensis/necator V2		0.0722381
	Cupriavidus basiliensis/necator PH - Cupriavidus basiliensis/necator V2		0.0793784
	Cupriavidus basiliensis/necator RE - Cupriavidus basiliensis/necator V2		0.0303907
Cupriavidus metallidurans/pauculus		0.0472616
	Cupriavidus metallidurans/pauculus ME - Cupriavidus metallidurans/pauculus UC		0.0207823
	Cupriavidus metallidurans/pauculus ME - Cupriavidus metallidurans/pauculus PH		0.110202
	Cupriavidus metallidurans/pauculus UC - Cupriavidus metallidurans/pauculus PH		0.298515
	Cupriavidus metallidurans/pauculus ME - Cupriavidus metallidurans/pauculus RE		0.021845
	Cupriavidus metallidurans/pauculus UC - Cupriavidus metallidurans/pauculus RE		0.43717
	Cupriavidus metallidurans/pauculus PH - Cupriavidus metallidurans/pauculus RE		0.282439
	Cupriavidus metallidurans/pauculus ME - Cupriavidus metallidurans/pauculus V2		0.00681687
	Cupriavidus metallidurans/pauculus UC - Cupriavidus metallidurans/pauculus V2		0.441414
	Cupriavidus metallidurans/pauculus PH - Cupriavidus metallidurans/pauculus V2		0.178697
	Cupriavidus metallidurans/pauculus RE - Cupriavidus metallidurans/pauculus V2		0.396121
Cutibacterium acnes		6.57723e-13
	Cutibacterium acnes ME - Cutibacterium acnes UC		0.238743
	Cutibacterium acnes ME - Cutibacterium acnes PH		0.472697
	Cutibacterium acnes UC - Cutibacterium acnes PH		0.272582
	Cutibacterium acnes ME - Cutibacterium acnes RE		0.349334
	Cutibacterium acnes UC - Cutibacterium acnes RE		0.378757
	Cutibacterium acnes PH - Cutibacterium acnes RE		0.370666
	Cutibacterium acnes ME - Cutibacterium acnes V2		1.79657e-10
	Cutibacterium acnes UC - Cutibacterium acnes V2		4.23559e-11
	Cutibacterium acnes PH - Cutibacterium acnes V2		9.77996e-10
	Cutibacterium acnes RE - Cutibacterium acnes V2		3.63185e-11
Cutibacterium avidum		3.44851e-07
	Cutibacterium avidum ME - Cutibacterium avidum UC		0.0542257
	Cutibacterium avidum ME - Cutibacterium avidum PH		0.271994
	Cutibacterium avidum UC - Cutibacterium avidum PH		0.169532
	Cutibacterium avidum ME - Cutibacterium avidum RE		0.379421
	Cutibacterium avidum UC - Cutibacterium avidum RE		0.036179
	Cutibacterium avidum PH - Cutibacterium avidum RE		0.204997
	Cutibacterium avidum ME - Cutibacterium avidum V2		1.03926e-07
	Cutibacterium avidum UC - Cutibacterium avidum V2		0.00436201
	Cutibacterium avidum PH - Cutibacterium avidum V2		7.84285e-06
	Cutibacterium avidum RE - Cutibacterium avidum V2		5.47726e-08
Delftia acidovorans/lacustris		0.0143432
	Delftia acidovorans/lacustris ME - Delftia acidovorans/lacustris UC		0.0169628
	Delftia acidovorans/lacustris ME - Delftia acidovorans/lacustris PH		0.0357197
	Delftia acidovorans/lacustris UC - Delftia acidovorans/lacustris PH		0.306823
	Delftia acidovorans/lacustris ME - Delftia acidovorans/lacustris RE		0.0451326
	Delftia acidovorans/lacustris UC - Delftia acidovorans/lacustris RE		0.29091
	Delftia acidovorans/lacustris PH - Delftia acidovorans/lacustris RE		0.402984
	Delftia acidovorans/lacustris ME - Delftia acidovorans/lacustris V2		0.000479618
	Delftia acidovorans/lacustris UC - Delftia acidovorans/lacustris V2		0.318635
	Delftia acidovorans/lacustris PH - Delftia acidovorans/lacustris V2		0.132045
	Delftia acidovorans/lacustris RE - Delftia acidovorans/lacustris V2		0.0887779
Dermabacter hominis		0.0101987
	Dermabacter hominis ME - Dermabacter hominis UC		0.249255
	Dermabacter hominis ME - Dermabacter hominis PH		0.234297
	Dermabacter hominis UC - Dermabacter hominis PH		0.443129
	Dermabacter hominis ME - Dermabacter hominis RE		0.0672975
	Dermabacter hominis UC - Dermabacter hominis RE		0.309603
	Dermabacter hominis PH - Dermabacter hominis RE		0.264135
	Dermabacter hominis ME - Dermabacter hominis V2		0.00036424
	Dermabacter hominis UC - Dermabacter hominis V2		0.0263106
	Dermabacter hominis PH - Dermabacter hominis V2		0.0118938
	Dermabacter hominis RE - Dermabacter hominis V2		0.0518504
Dialister microaerophilus		5.77825e-06
	Dialister microaerophilus ME - Dialister microaerophilus UC		0.371626
	Dialister microaerophilus ME - Dialister microaerophilus PH		0.16209
	Dialister microaerophilus UC - Dialister microaerophilus PH		0.342114
	Dialister microaerophilus ME - Dialister microaerophilus RE		0.343874
	Dialister microaerophilus UC - Dialister microaerophilus RE		0.421507
	Dialister microaerophilus PH - Dialister microaerophilus RE		0.30266
	Dialister microaerophilus ME - Dialister microaerophilus V2		5.59419e-07
	Dialister microaerophilus UC - Dialister microaerophilus V2		4.3244e-05
	Dialister microaerophilus PH - Dialister microaerophilus V2		0.000286125
	Dialister microaerophilus RE - Dialister microaerophilus V2		1.63867e-05
Dialister propionicifaciens		2.13324e-07
	Dialister propionicifaciens ME - Dialister propionicifaciens UC		0.0546554
	Dialister propionicifaciens ME - Dialister propionicifaciens PH		0.164897
	Dialister propionicifaciens UC - Dialister propionicifaciens PH		0.259336
	Dialister propionicifaciens ME - Dialister propionicifaciens RE		0.265826
	Dialister propionicifaciens UC - Dialister propionicifaciens RE		0.165205
	Dialister propionicifaciens PH - Dialister propionicifaciens RE		0.308364
	Dialister propionicifaciens ME - Dialister propionicifaciens V2		3.84701e-09
	Dialister propionicifaciens UC - Dialister propionicifaciens V2		0.000764865
	Dialister propionicifaciens PH - Dialister propionicifaciens V2		6.67056e-06
	Dialister propionicifaciens RE - Dialister propionicifaciens V2		3.91511e-07
Diaphorobacter nitroreducens/aerolatus		0.039059
	Diaphorobacter nitroreducens/aerolatus ME - Diaphorobacter nitroreducens/aerolatus UC		0.00418111
	Diaphorobacter nitroreducens/aerolatus ME - Diaphorobacter nitroreducens/aerolatus PH		0.354682
	Diaphorobacter nitroreducens/aerolatus UC - Diaphorobacter nitroreducens/aerolatus PH		0.0189633
	Diaphorobacter nitroreducens/aerolatus ME - Diaphorobacter nitroreducens/aerolatus RE		0.483742
	Diaphorobacter nitroreducens/aerolatus UC - Diaphorobacter nitroreducens/aerolatus RE		0.00394852
	Diaphorobacter nitroreducens/aerolatus PH - Diaphorobacter nitroreducens/aerolatus RE		0.321181
	Diaphorobacter nitroreducens/aerolatus ME - Diaphorobacter nitroreducens/aerolatus V2		0.307937
	Diaphorobacter nitroreducens/aerolatus UC - Diaphorobacter nitroreducens/aerolatus V2		0.0150157
	Diaphorobacter nitroreducens/aerolatus PH - Diaphorobacter nitroreducens/aerolatus V2		0.468131
	Diaphorobacter nitroreducens/aerolatus RE - Diaphorobacter nitroreducens/aerolatus V2		0.295584
Enterobacter/Kosakonia/Yokenella		0.00362482
	Enterobacter/Kosakonia/Yokenella ME - Enterobacter/Kosakonia/Yokenella UC		0.116262
	Enterobacter/Kosakonia/Yokenella ME - Enterobacter/Kosakonia/Yokenella PH		0.102715
	Enterobacter/Kosakonia/Yokenella UC - Enterobacter/Kosakonia/Yokenella PH		0.435769
	Enterobacter/Kosakonia/Yokenella ME - Enterobacter/Kosakonia/Yokenella RE		0.283556
	Enterobacter/Kosakonia/Yokenella UC - Enterobacter/Kosakonia/Yokenella RE		0.236244
	Enterobacter/Kosakonia/Yokenella PH - Enterobacter/Kosakonia/Yokenella RE		0.235116
	Enterobacter/Kosakonia/Yokenella ME - Enterobacter/Kosakonia/Yokenella V2		0.000153106
	Enterobacter/Kosakonia/Yokenella UC - Enterobacter/Kosakonia/Yokenella V2		0.0505453
	Enterobacter/Kosakonia/Yokenella PH - Enterobacter/Kosakonia/Yokenella V2		0.0242745
	Enterobacter/Kosakonia/Yokenella RE - Enterobacter/Kosakonia/Yokenella V2		0.00148674
Ezakiella		0.0242404
	Ezakiella ME - Ezakiella UC		0.0724405
	Ezakiella ME - Ezakiella PH		0.110357
	Ezakiella UC - Ezakiella PH		0.323949
	Ezakiella ME - Ezakiella RE		0.355236
	Ezakiella UC - Ezakiella RE		0.118829
	Ezakiella PH - Ezakiella RE		0.159801
	Ezakiella ME - Ezakiella V2		0.00417898
	Ezakiella UC - Ezakiella V2		0.240586
	Ezakiella PH - Ezakiella V2		0.0934115
	Ezakiella RE - Ezakiella V2		0.00899521
Facklamia hominis		0.0200617
	Facklamia hominis ME - Facklamia hominis UC		0.308409
	Facklamia hominis ME - Facklamia hominis PH		0.11703
	Facklamia hominis UC - Facklamia hominis PH		0.335558
	Facklamia hominis ME - Facklamia hominis RE		0.291551
	Facklamia hominis UC - Facklamia hominis RE		0.45371
	Facklamia hominis PH - Facklamia hominis RE		0.292699
	Facklamia hominis ME - Facklamia hominis V2		0.00171604
	Facklamia hominis UC - Facklamia hominis V2		0.024804
	Facklamia hominis PH - Facklamia hominis V2		0.080482
	Facklamia hominis RE - Facklamia hominis V2		0.0100349
Faecalibacillus		0.0020336
	Faecalibacillus ME - Faecalibacillus UC		0.254265
	Faecalibacillus ME - Faecalibacillus PH		0.00125733
	Faecalibacillus UC - Faecalibacillus PH		0.030701
	Faecalibacillus ME - Faecalibacillus RE		0.00117335
	Faecalibacillus UC - Faecalibacillus RE		0.0298632
	Faecalibacillus PH - Faecalibacillus RE		0.478542
	Faecalibacillus ME - Faecalibacillus V2		0.000955364
	Faecalibacillus UC - Faecalibacillus V2		0.0251304
	Faecalibacillus PH - Faecalibacillus V2		0.547537
	Faecalibacillus RE - Faecalibacillus V2		0.510166
Faecalibacterium		0.0209541
	Faecalibacterium ME - Faecalibacterium UC		0.341589
	Faecalibacterium ME - Faecalibacterium PH		0.0991556
	Faecalibacterium UC - Faecalibacterium PH		0.204775
	Faecalibacterium ME - Faecalibacterium RE		0.235517
	Faecalibacterium UC - Faecalibacterium RE		0.326336
	Faecalibacterium PH - Faecalibacterium RE		0.304994
	Faecalibacterium ME - Faecalibacterium V2		0.0015728
	Faecalibacterium UC - Faecalibacterium V2		0.0207376
	Faecalibacterium PH - Faecalibacterium V2		0.0928963
	Faecalibacterium RE - Faecalibacterium V2		0.0237008
Fenollaria		0.000641652
	Fenollaria ME - Fenollaria UC		0.00530753
	Fenollaria ME - Fenollaria PH		0.317438
	Fenollaria UC - Fenollaria PH		0.0295708
	Fenollaria ME - Fenollaria RE		0.370153
	Fenollaria UC - Fenollaria RE		0.011244
	Fenollaria PH - Fenollaria RE		0.368874
	Fenollaria ME - Fenollaria V2		0.000263343
	Fenollaria UC - Fenollaria V2		0.330685
	Fenollaria PH - Fenollaria V2		0.00307042
	Fenollaria RE - Fenollaria V2		0.000670374
Finegoldia magna		6.34786e-07
	Finegoldia magna ME - Finegoldia magna UC		0.0519435
	Finegoldia magna ME - Finegoldia magna PH		0.335414
	Finegoldia magna UC - Finegoldia magna PH		0.128162
	Finegoldia magna ME - Finegoldia magna RE		0.303118
	Finegoldia magna UC - Finegoldia magna RE		0.137386
	Finegoldia magna PH - Finegoldia magna RE		0.489639
	Finegoldia magna ME - Finegoldia magna V2		6.00496e-08
	Finegoldia magna UC - Finegoldia magna V2		0.00327651
	Finegoldia magna PH - Finegoldia magna V2		1.95945e-06
	Finegoldia magna RE - Finegoldia magna V2		1.45692e-06
Howardella		3.36858e-05
	Howardella ME - Howardella UC		0.361114
	Howardella ME - Howardella PH		0.322668
	Howardella UC - Howardella PH		0.50303
	Howardella ME - Howardella RE		0.343629
	Howardella UC - Howardella RE		0.537259
	Howardella PH - Howardella RE		0.475515
	Howardella ME - Howardella V2		0.000197479
	Howardella UC - Howardella V2		0.000114104
	Howardella PH - Howardella V2		1.53438e-05
	Howardella RE - Howardella V2		1.37547e-05
Labilithrix		0.0109998
	Labilithrix ME - Labilithrix UC		0.111504
	Labilithrix ME - Labilithrix PH		0.407407
	Labilithrix UC - Labilithrix PH		0.0784452
	Labilithrix ME - Labilithrix RE		0.394876
	Labilithrix UC - Labilithrix RE		0.151617
	Labilithrix PH - Labilithrix RE		0.345483
	Labilithrix ME - Labilithrix V2		0.0138215
	Labilithrix UC - Labilithrix V2		0.000631779
	Labilithrix PH - Labilithrix V2		0.0351805
	Labilithrix RE - Labilithrix V2		0.0101785
Lachnospira		0.0472616
	Lachnospira ME - Lachnospira UC		0.439518
	Lachnospira ME - Lachnospira PH		0.0677805
	Lachnospira UC - Lachnospira PH		0.117888
	Lachnospira ME - Lachnospira RE		0.0407546
	Lachnospira UC - Lachnospira RE		0.0613422
	Lachnospira PH - Lachnospira RE		0.377925
	Lachnospira ME - Lachnospira V2		0.0174213
	Lachnospira UC - Lachnospira V2		0.0272863
	Lachnospira PH - Lachnospira V2		0.244189
	Lachnospira RE - Lachnospira V2		0.372901
Lawsonella		0.00542306
	Lawsonella ME - Lawsonella UC		0.0872692
	Lawsonella ME - Lawsonella PH		0.367019
	Lawsonella UC - Lawsonella PH		0.102664
	Lawsonella ME - Lawsonella RE		0.110761
	Lawsonella UC - Lawsonella RE		0.388451
	Lawsonella PH - Lawsonella RE		0.142664
	Lawsonella ME - Lawsonella V2		0.000428481
	Lawsonella UC - Lawsonella V2		0.0928144
	Lawsonella PH - Lawsonella V2		0.00147122
	Lawsonella RE - Lawsonella V2		0.0417892
Lawsonella clevelandensis		1.23484e-06
	Lawsonella clevelandensis ME - Lawsonella clevelandensis UC		0.0812116
	Lawsonella clevelandensis ME - Lawsonella clevelandensis PH		0.0977777
	Lawsonella clevelandensis UC - Lawsonella clevelandensis PH		0.441076
	Lawsonella clevelandensis ME - Lawsonella clevelandensis RE		0.0787064
	Lawsonella clevelandensis UC - Lawsonella clevelandensis RE		0.44618
	Lawsonella clevelandensis PH - Lawsonella clevelandensis RE		0.441382
	Lawsonella clevelandensis ME - Lawsonella clevelandensis V2		8.29033e-09
	Lawsonella clevelandensis UC - Lawsonella clevelandensis V2		0.000582309
	Lawsonella clevelandensis PH - Lawsonella clevelandensis V2		4.4882e-05
	Lawsonella clevelandensis RE - Lawsonella clevelandensis V2		3.89854e-05
Leptotrichia		0.029582
	Leptotrichia ME - Leptotrichia UC		0.0993894
	Leptotrichia ME - Leptotrichia PH		0.104515
	Leptotrichia UC - Leptotrichia PH		0.467972
	Leptotrichia ME - Leptotrichia RE		0.0951421
	Leptotrichia UC - Leptotrichia RE		0.510511
	Leptotrichia PH - Leptotrichia RE		0.525461
	Leptotrichia ME - Leptotrichia V2		0.000958147
	Leptotrichia UC - Leptotrichia V2		0.0786605
	Leptotrichia PH - Leptotrichia V2		0.106105
	Leptotrichia RE - Leptotrichia V2		0.104234
Mobiluncus		0.0046393
	Mobiluncus ME - Mobiluncus UC		0.148023
	Mobiluncus ME - Mobiluncus PH		0.302768
	Mobiluncus UC - Mobiluncus PH		0.303216
	Mobiluncus ME - Mobiluncus RE		0.234064
	Mobiluncus UC - Mobiluncus RE		0.350931
	Mobiluncus PH - Mobiluncus RE		0.400384
	Mobiluncus ME - Mobiluncus V2		0.000190957
	Mobiluncus UC - Mobiluncus V2		0.0413441
	Mobiluncus PH - Mobiluncus V2		0.00407001
	Mobiluncus RE - Mobiluncus V2		0.00520975
Mobiluncus curtisii		0.00576574
	Mobiluncus curtisii ME - Mobiluncus curtisii UC		0.248283
	Mobiluncus curtisii ME - Mobiluncus curtisii PH		0.393356
	Mobiluncus curtisii UC - Mobiluncus curtisii PH		0.347871
	Mobiluncus curtisii ME - Mobiluncus curtisii RE		0.362269
	Mobiluncus curtisii UC - Mobiluncus curtisii RE		0.38073
	Mobiluncus curtisii PH - Mobiluncus curtisii RE		0.483749
	Mobiluncus curtisii ME - Mobiluncus curtisii V2		0.000642641
	Mobiluncus curtisii UC - Mobiluncus curtisii V2		0.0369999
	Mobiluncus curtisii PH - Mobiluncus curtisii V2		0.00232157
	Mobiluncus curtisii RE - Mobiluncus curtisii V2		0.00232131
Mobiluncus mulieris		0.00639974
	Mobiluncus mulieris ME - Mobiluncus mulieris UC		0.499917
	Mobiluncus mulieris ME - Mobiluncus mulieris PH		0.5
	Mobiluncus mulieris UC - Mobiluncus mulieris PH		0.426515
	Mobiluncus mulieris ME - Mobiluncus mulieris RE		0.444867
	Mobiluncus mulieris UC - Mobiluncus mulieris RE		0.453073
	Mobiluncus mulieris PH - Mobiluncus mulieris RE		0.396748
	Mobiluncus mulieris ME - Mobiluncus mulieris V2		0.0013364
	Mobiluncus mulieris UC - Mobiluncus mulieris V2		0.015424
	Mobiluncus mulieris PH - Mobiluncus mulieris V2		0.00111546
	Mobiluncus mulieris RE - Mobiluncus mulieris V2		0.00335764
Murdochiella		5.3178e-05
	Murdochiella ME - Murdochiella UC		0.746065
	Murdochiella ME - Murdochiella PH		0.51511
	Murdochiella UC - Murdochiella PH		0.834481
	Murdochiella ME - Murdochiella RE		0.491537
	Murdochiella UC - Murdochiella RE		0.6509
	Murdochiella PH - Murdochiella RE		0.569942
	Murdochiella ME - Murdochiella V2		5.4677e-05
	Murdochiella UC - Murdochiella V2		8.59895e-05
	Murdochiella PH - Murdochiella V2		5.71455e-05
	Murdochiella RE - Murdochiella V2		3.35035e-05
Muribaculaceae		0.0174413
	Muribaculaceae ME - Muribaculaceae UC		0.00726638
	Muribaculaceae ME - Muribaculaceae PH		0.0103815
	Muribaculaceae UC - Muribaculaceae PH		0.408072
	Muribaculaceae ME - Muribaculaceae RE		0.0116325
	Muribaculaceae UC - Muribaculaceae RE		0.428021
	Muribaculaceae PH - Muribaculaceae RE		0.469748
	Muribaculaceae ME - Muribaculaceae V2		0.00170597
	Muribaculaceae UC - Muribaculaceae V2		0.4527
	Muribaculaceae PH - Muribaculaceae V2		0.499296
	Muribaculaceae RE - Muribaculaceae V2		0.383086
Myxococcales		5.99765e-05
	Myxococcales ME - Myxococcales UC		0.433551
	Myxococcales ME - Myxococcales PH		0.447421
	Myxococcales UC - Myxococcales PH		0.434607
	Myxococcales ME - Myxococcales RE		0.0134195
	Myxococcales UC - Myxococcales RE		0.0120099
	Myxococcales PH - Myxococcales RE		0.0128196
	Myxococcales ME - Myxococcales V2		0.00510752
	Myxococcales UC - Myxococcales V2		0.0154459
	Myxococcales PH - Myxococcales V2		0.0109086
	Myxococcales RE - Myxococcales V2		1.95033e-07
Negativicoccus succinivorans		0.00276528
	Negativicoccus succinivorans ME - Negativicoccus succinivorans UC		0.5
	Negativicoccus succinivorans ME - Negativicoccus succinivorans PH		0.595699
	Negativicoccus succinivorans UC - Negativicoccus succinivorans PH		0.455898
	Negativicoccus succinivorans ME - Negativicoccus succinivorans RE		0.516803
	Negativicoccus succinivorans UC - Negativicoccus succinivorans RE		0.413777
	Negativicoccus succinivorans PH - Negativicoccus succinivorans RE		0.535672
	Negativicoccus succinivorans ME - Negativicoccus succinivorans V2		0.000528096
	Negativicoccus succinivorans UC - Negativicoccus succinivorans V2		0.00173884
	Negativicoccus succinivorans PH - Negativicoccus succinivorans V2		0.00175741
	Negativicoccus succinivorans RE - Negativicoccus succinivorans V2		0.00153858
Nocardioides		0.0122522
	Nocardioides ME - Nocardioides UC		0.0230621
	Nocardioides ME - Nocardioides PH		0.316997
	Nocardioides UC - Nocardioides PH		0.0128806
	Nocardioides ME - Nocardioides RE		0.493117
	Nocardioides UC - Nocardioides RE		0.028172
	Nocardioides PH - Nocardioides RE		0.306474
	Nocardioides ME - Nocardioides V2		0.0137508
	Nocardioides UC - Nocardioides V2		0.5
	Nocardioides PH - Nocardioides V2		0.00638168
	Nocardioides RE - Nocardioides V2		0.0174808
Olsenella		1.00638e-05
	Olsenella ME - Olsenella UC		0.503775
	Olsenella ME - Olsenella PH		0.484896
	Olsenella UC - Olsenella PH		0.610326
	Olsenella ME - Olsenella RE		0.489864
	Olsenella UC - Olsenella RE		0.447501
	Olsenella PH - Olsenella RE		0.560297
	Olsenella ME - Olsenella V2		1.34594e-05
	Olsenella UC - Olsenella V2		2.13232e-05
	Olsenella PH - Olsenella V2		3.0712e-05
	Olsenella RE - Olsenella V2		9.62329e-06
Parabacteroides merdae		0.00178559
	Parabacteroides merdae ME - Parabacteroides merdae UC		0.00164431
	Parabacteroides merdae ME - Parabacteroides merdae PH		0.000473354
	Parabacteroides merdae UC - Parabacteroides merdae PH		0.53399
	Parabacteroides merdae ME - Parabacteroides merdae RE		0.000614533
	Parabacteroides merdae UC - Parabacteroides merdae RE		0.595425
	Parabacteroides merdae PH - Parabacteroides merdae RE		0.48975
	Parabacteroides merdae ME - Parabacteroides merdae V2		0.000377444
	Parabacteroides merdae UC - Parabacteroides merdae V2		0.537301
	Parabacteroides merdae PH - Parabacteroides merdae V2		0.664507
	Parabacteroides merdae RE - Parabacteroides merdae V2		0.772067
Pelomonas		0.00178559
	Pelomonas ME - Pelomonas UC		0.249304
	Pelomonas ME - Pelomonas PH		0.0221028
	Pelomonas UC - Pelomonas PH		0.00950364
	Pelomonas ME - Pelomonas RE		0.229567
	Pelomonas UC - Pelomonas RE		0.11496
	Pelomonas PH - Pelomonas RE		0.102352
	Pelomonas ME - Pelomonas V2		0.000905805
	Pelomonas UC - Pelomonas V2		0.000502543
	Pelomonas PH - Pelomonas V2		0.169598
	Pelomonas RE - Pelomonas V2		0.00730119
Peptoniphilus		0.000332184
	Peptoniphilus ME - Peptoniphilus UC		0.0584192
	Peptoniphilus ME - Peptoniphilus PH		0.493823
	Peptoniphilus UC - Peptoniphilus PH		0.0594194
	Peptoniphilus ME - Peptoniphilus RE		0.502738
	Peptoniphilus UC - Peptoniphilus RE		0.0556129
	Peptoniphilus PH - Peptoniphilus RE		0.459642
	Peptoniphilus ME - Peptoniphilus V2		0.000195757
	Peptoniphilus UC - Peptoniphilus V2		0.0762672
	Peptoniphilus PH - Peptoniphilus V2		0.000131926
	Peptoniphilus RE - Peptoniphilus V2		0.000171254
Peptoniphilus coxi		1.23484e-06
	Peptoniphilus coxi ME - Peptoniphilus coxi UC		0.466907
	Peptoniphilus coxi ME - Peptoniphilus coxi PH		0.468315
	Peptoniphilus coxi UC - Peptoniphilus coxi PH		0.521221
	Peptoniphilus coxi ME - Peptoniphilus coxi RE		0.514343
	Peptoniphilus coxi UC - Peptoniphilus coxi RE		0.559646
	Peptoniphilus coxi PH - Peptoniphilus coxi RE		0.47704
	Peptoniphilus coxi ME - Peptoniphilus coxi V2		7.65895e-06
	Peptoniphilus coxi UC - Peptoniphilus coxi V2		1.00411e-05
	Peptoniphilus coxi PH - Peptoniphilus coxi V2		1.39121e-06
	Peptoniphilus coxi RE - Peptoniphilus coxi V2		1.11175e-06
Peptoniphilus gorbachii		3.36858e-05
	Peptoniphilus gorbachii ME - Peptoniphilus gorbachii UC		0.402445
	Peptoniphilus gorbachii ME - Peptoniphilus gorbachii PH		0.3943
	Peptoniphilus gorbachii UC - Peptoniphilus gorbachii PH		0.323366
	Peptoniphilus gorbachii ME - Peptoniphilus gorbachii RE		0.437384
	Peptoniphilus gorbachii UC - Peptoniphilus gorbachii RE		0.39793
	Peptoniphilus gorbachii PH - Peptoniphilus gorbachii RE		0.415316
	Peptoniphilus gorbachii ME - Peptoniphilus gorbachii V2		2.04013e-05
	Peptoniphilus gorbachii UC - Peptoniphilus gorbachii V2		0.00150644
	Peptoniphilus gorbachii PH - Peptoniphilus gorbachii V2		1.2832e-05
	Peptoniphilus gorbachii RE - Peptoniphilus gorbachii V2		1.96873e-05
Peptoniphilus grossensis		0.00542306
	Peptoniphilus grossensis ME - Peptoniphilus grossensis UC		0.0280015
	Peptoniphilus grossensis ME - Peptoniphilus grossensis PH		0.449906
	Peptoniphilus grossensis UC - Peptoniphilus grossensis PH		0.0357146
	Peptoniphilus grossensis ME - Peptoniphilus grossensis RE		0.416394
	Peptoniphilus grossensis UC - Peptoniphilus grossensis RE		0.017645
	Peptoniphilus grossensis PH - Peptoniphilus grossensis RE		0.415844
	Peptoniphilus grossensis ME - Peptoniphilus grossensis V2		0.00373057
	Peptoniphilus grossensis UC - Peptoniphilus grossensis V2		0.418912
	Peptoniphilus grossensis PH - Peptoniphilus grossensis V2		0.00563114
	Peptoniphilus grossensis RE - Peptoniphilus grossensis V2		0.00275577
Peptoniphilus harei		0.00158477
	Peptoniphilus harei ME - Peptoniphilus harei UC		0.48638
	Peptoniphilus harei ME - Peptoniphilus harei PH		0.492445
	Peptoniphilus harei UC - Peptoniphilus harei PH		0.463859
	Peptoniphilus harei ME - Peptoniphilus harei RE		0.499323
	Peptoniphilus harei UC - Peptoniphilus harei RE		0.427819
	Peptoniphilus harei PH - Peptoniphilus harei RE		0.555262
	Peptoniphilus harei ME - Peptoniphilus harei V2		0.000221273
	Peptoniphilus harei UC - Peptoniphilus harei V2		0.00201254
	Peptoniphilus harei PH - Peptoniphilus harei V2		0.00203737
	Peptoniphilus harei RE - Peptoniphilus harei V2		0.000420397
Peptoniphilus lacrimalis		3.33896e-06
	Peptoniphilus lacrimalis ME - Peptoniphilus lacrimalis UC		0.116425
	Peptoniphilus lacrimalis ME - Peptoniphilus lacrimalis PH		0.268605
	Peptoniphilus lacrimalis UC - Peptoniphilus lacrimalis PH		0.259324
	Peptoniphilus lacrimalis ME - Peptoniphilus lacrimalis RE		0.395001
	Peptoniphilus lacrimalis UC - Peptoniphilus lacrimalis RE		0.0900316
	Peptoniphilus lacrimalis PH - Peptoniphilus lacrimalis RE		0.24492
	Peptoniphilus lacrimalis ME - Peptoniphilus lacrimalis V2		9.97072e-07
	Peptoniphilus lacrimalis UC - Peptoniphilus lacrimalis V2		0.00420369
	Peptoniphilus lacrimalis PH - Peptoniphilus lacrimalis V2		5.11551e-05
	Peptoniphilus lacrimalis RE - Peptoniphilus lacrimalis V2		6.99506e-07
Phascolarctobacterium		0.0186223
	Phascolarctobacterium ME - Phascolarctobacterium UC		0.00657123
	Phascolarctobacterium ME - Phascolarctobacterium PH		0.00909027
	Phascolarctobacterium UC - Phascolarctobacterium PH		0.402152
	Phascolarctobacterium ME - Phascolarctobacterium RE		0.0220831
	Phascolarctobacterium UC - Phascolarctobacterium RE		0.314745
	Phascolarctobacterium PH - Phascolarctobacterium RE		0.362405
	Phascolarctobacterium ME - Phascolarctobacterium V2		0.00235321
	Phascolarctobacterium UC - Phascolarctobacterium V2		0.5
	Phascolarctobacterium PH - Phascolarctobacterium V2		0.424293
	Phascolarctobacterium RE - Phascolarctobacterium V2		0.307012
Phocaeicola massiliensis		0.0174458
	Phocaeicola massiliensis ME - Phocaeicola massiliensis UC		0.0454415
	Phocaeicola massiliensis ME - Phocaeicola massiliensis PH		0.00345431
	Phocaeicola massiliensis UC - Phocaeicola massiliensis PH		0.265262
	Phocaeicola massiliensis ME - Phocaeicola massiliensis RE		0.0574729
	Phocaeicola massiliensis UC - Phocaeicola massiliensis RE		0.418837
	Phocaeicola massiliensis PH - Phocaeicola massiliensis RE		0.22116
	Phocaeicola massiliensis ME - Phocaeicola massiliensis V2		0.00154694
	Phocaeicola massiliensis UC - Phocaeicola massiliensis V2		0.217412
	Phocaeicola massiliensis PH - Phocaeicola massiliensis V2		0.462586
	Phocaeicola massiliensis RE - Phocaeicola massiliensis V2		0.163354
Phocaeicola vulgatus		0.0319519
	Phocaeicola vulgatus ME - Phocaeicola vulgatus UC		0.0680877
	Phocaeicola vulgatus ME - Phocaeicola vulgatus PH		0.00746371
	Phocaeicola vulgatus UC - Phocaeicola vulgatus PH		0.345086
	Phocaeicola vulgatus ME - Phocaeicola vulgatus RE		0.00451777
	Phocaeicola vulgatus UC - Phocaeicola vulgatus RE		0.329349
	Phocaeicola vulgatus PH - Phocaeicola vulgatus RE		0.452104
	Phocaeicola vulgatus ME - Phocaeicola vulgatus V2		0.0168619
	Phocaeicola vulgatus UC - Phocaeicola vulgatus V2		0.427046
	Phocaeicola vulgatus PH - Phocaeicola vulgatus V2		0.318039
	Phocaeicola vulgatus RE - Phocaeicola vulgatus V2		0.320974
Porphyromonas somerae		0.0186223
	Porphyromonas somerae ME - Porphyromonas somerae UC		0.520927
	Porphyromonas somerae ME - Porphyromonas somerae PH		0.506149
	Porphyromonas somerae UC - Porphyromonas somerae PH		0.481026
	Porphyromonas somerae ME - Porphyromonas somerae RE		0.452975
	Porphyromonas somerae UC - Porphyromonas somerae RE		0.518573
	Porphyromonas somerae PH - Porphyromonas somerae RE		0.481103
	Porphyromonas somerae ME - Porphyromonas somerae V2		0.00251517
	Porphyromonas somerae UC - Porphyromonas somerae V2		0.0210389
	Porphyromonas somerae PH - Porphyromonas somerae V2		0.00783076
	Porphyromonas somerae RE - Porphyromonas somerae V2		0.00818076
Porphyromonas uenonis		0.0162134
	Porphyromonas uenonis ME - Porphyromonas uenonis UC		0.545239
	Porphyromonas uenonis ME - Porphyromonas uenonis PH		0.791356
	Porphyromonas uenonis UC - Porphyromonas uenonis PH		0.59449
	Porphyromonas uenonis ME - Porphyromonas uenonis RE		0.607194
	Porphyromonas uenonis UC - Porphyromonas uenonis RE		0.496617
	Porphyromonas uenonis PH - Porphyromonas uenonis RE		0.684001
	Porphyromonas uenonis ME - Porphyromonas uenonis V2		0.00507474
	Porphyromonas uenonis UC - Porphyromonas uenonis V2		0.00809336
	Porphyromonas uenonis PH - Porphyromonas uenonis V2		0.00592762
	Porphyromonas uenonis RE - Porphyromonas uenonis V2		0.00349696
Prevotella bergensis		2.30827e-06
	Prevotella bergensis ME - Prevotella bergensis UC		0.571745
	Prevotella bergensis ME - Prevotella bergensis PH		0.5
	Prevotella bergensis UC - Prevotella bergensis PH		0.415999
	Prevotella bergensis ME - Prevotella bergensis RE		0.555556
	Prevotella bergensis UC - Prevotella bergensis RE		0.480041
	Prevotella bergensis PH - Prevotella bergensis RE		0.625
	Prevotella bergensis ME - Prevotella bergensis V2		2.38701e-06
	Prevotella bergensis UC - Prevotella bergensis V2		0.000160762
	Prevotella bergensis PH - Prevotella bergensis V2		2.05635e-06
	Prevotella bergensis RE - Prevotella bergensis V2		1.76603e-06
Prevotella bivia		0.0041232
	Prevotella bivia ME - Prevotella bivia UC		0.214085
	Prevotella bivia ME - Prevotella bivia PH		0.217902
	Prevotella bivia UC - Prevotella bivia PH		0.494331
	Prevotella bivia ME - Prevotella bivia RE		0.476366
	Prevotella bivia UC - Prevotella bivia RE		0.227215
	Prevotella bivia PH - Prevotella bivia RE		0.235888
	Prevotella bivia ME - Prevotella bivia V2		0.000444675
	Prevotella bivia UC - Prevotella bivia V2		0.0258618
	Prevotella bivia PH - Prevotella bivia V2		0.0172311
	Prevotella bivia RE - Prevotella bivia V2		0.000531617
Prevotella buccalis		7.38189e-05
	Prevotella buccalis ME - Prevotella buccalis UC		0.0146977
	Prevotella buccalis ME - Prevotella buccalis PH		0.313711
	Prevotella buccalis UC - Prevotella buccalis PH		0.0530108
	Prevotella buccalis ME - Prevotella buccalis RE		0.39426
	Prevotella buccalis UC - Prevotella buccalis RE		0.0241577
	Prevotella buccalis PH - Prevotella buccalis RE		0.381469
	Prevotella buccalis ME - Prevotella buccalis V2		2.32294e-05
	Prevotella buccalis UC - Prevotella buccalis V2		0.106142
	Prevotella buccalis PH - Prevotella buccalis V2		0.000323266
	Prevotella buccalis RE - Prevotella buccalis V2		5.65084e-05
Prevotella corporis		0.000515146
	Prevotella corporis ME - Prevotella corporis UC		0.0705404
	Prevotella corporis ME - Prevotella corporis PH		0.299458
	Prevotella corporis UC - Prevotella corporis PH		0.187212
	Prevotella corporis ME - Prevotella corporis RE		0.239926
	Prevotella corporis UC - Prevotella corporis RE		0.217157
	Prevotella corporis PH - Prevotella corporis RE		0.37326
	Prevotella corporis ME - Prevotella corporis V2		2.74354e-05
	Prevotella corporis UC - Prevotella corporis V2		0.0407702
	Prevotella corporis PH - Prevotella corporis V2		0.000439569
	Prevotella corporis RE - Prevotella corporis V2		0.000792263
Prevotella disiens		0.0438258
	Prevotella disiens ME - Prevotella disiens UC		0.18552
	Prevotella disiens ME - Prevotella disiens PH		0.120346
	Prevotella disiens UC - Prevotella disiens PH		0.431692
	Prevotella disiens ME - Prevotella disiens RE		0.337447
	Prevotella disiens UC - Prevotella disiens RE		0.187221
	Prevotella disiens PH - Prevotella disiens RE		0.187528
	Prevotella disiens ME - Prevotella disiens V2		0.00514451
	Prevotella disiens UC - Prevotella disiens V2		0.175466
	Prevotella disiens PH - Prevotella disiens V2		0.143501
	Prevotella disiens RE - Prevotella disiens V2		0.0168954
Prevotella melaninogenica		0.0316896
	Prevotella melaninogenica ME - Prevotella melaninogenica UC		0.0641066
	Prevotella melaninogenica ME - Prevotella melaninogenica PH		0.04628
	Prevotella melaninogenica UC - Prevotella melaninogenica PH		0.478272
	Prevotella melaninogenica ME - Prevotella melaninogenica RE		0.018189
	Prevotella melaninogenica UC - Prevotella melaninogenica RE		0.412586
	Prevotella melaninogenica PH - Prevotella melaninogenica RE		0.374384
	Prevotella melaninogenica ME - Prevotella melaninogenica V2		0.00182606
	Prevotella melaninogenica UC - Prevotella melaninogenica V2		0.213465
	Prevotella melaninogenica PH - Prevotella melaninogenica V2		0.234922
	Prevotella melaninogenica RE - Prevotella melaninogenica V2		0.315402
Prevotella timonensis		1.23484e-06
	Prevotella timonensis ME - Prevotella timonensis UC		0.131803
	Prevotella timonensis ME - Prevotella timonensis PH		0.316609
	Prevotella timonensis UC - Prevotella timonensis PH		0.240569
	Prevotella timonensis ME - Prevotella timonensis RE		0.294974
	Prevotella timonensis UC - Prevotella timonensis RE		0.0613753
	Prevotella timonensis PH - Prevotella timonensis RE		0.199784
	Prevotella timonensis ME - Prevotella timonensis V2		7.2809e-07
	Prevotella timonensis UC - Prevotella timonensis V2		0.00284905
	Prevotella timonensis PH - Prevotella timonensis V2		2.15997e-05
	Prevotella timonensis RE - Prevotella timonensis V2		1.05706e-07
Propionibacterium lympholium		3.44851e-07
Propionibacterium lympholium	Propionibacterium lympholium ME - Propionibacterium lympholium UC		0.406194
	Propionibacterium lympholium ME - Propionibacterium lympholium PH		0.374849
	Propionibacterium lympholium UC - Propionibacterium lympholium PH		0.445085
	Propionibacterium lympholium ME - Propionibacterium lympholium RE		0.397128
	Propionibacterium lympholium UC - Propionibacterium lympholium RE		0.441222
	Propionibacterium lympholium PH - Propionibacterium lympholium RE		0.434068
	Propionibacterium lympholium ME - Propionibacterium lympholium V2		5.4217e-08
	Propionibacterium lympholium UC - Propionibacterium lympholium V2		4.05058e-05
	Propionibacterium lympholium PH - Propionibacterium lympholium V2		3.6366e-06
	Propionibacterium lympholium RE - Propionibacterium lympholium V2		3.64035e-07
Proteobacteria		0.0010246
	Proteobacteria ME - Proteobacteria UC		0.320787
	Proteobacteria ME - Proteobacteria PH		0.300905
	Proteobacteria UC - Proteobacteria PH		0.447386
	Proteobacteria ME - Proteobacteria RE		0.241665
	Proteobacteria UC - Proteobacteria RE		0.479047
	Proteobacteria PH - Proteobacteria RE		0.459971
	Proteobacteria ME - Proteobacteria V2		0.00332408
	Proteobacteria UC - Proteobacteria V2		0.000742869
	Proteobacteria PH - Proteobacteria V2		0.000508517
	Proteobacteria RE - Proteobacteria V2		0.000162499
Pseudomonas tolaasii/poae		2.46024e-08
	Pseudomonas tolaasii/poae ME - Pseudomonas tolaasii/poae UC		0.495919
	Pseudomonas tolaasii/poae ME - Pseudomonas tolaasii/poae PH		0.168703
	Pseudomonas tolaasii/poae UC - Pseudomonas tolaasii/poae PH		0.182404
	Pseudomonas tolaasii/poae ME - Pseudomonas tolaasii/poae RE		0.234904
	Pseudomonas tolaasii/poae UC - Pseudomonas tolaasii/poae RE		0.239771
	Pseudomonas tolaasii/poae PH - Pseudomonas tolaasii/poae RE		0.376733
	Pseudomonas tolaasii/poae ME - Pseudomonas tolaasii/poae V2		2.68056e-09
	Pseudomonas tolaasii/poae UC - Pseudomonas tolaasii/poae V2		1.32875e-07
	Pseudomonas tolaasii/poae PH - Pseudomonas tolaasii/poae V2		5.93456e-06
	Pseudomonas tolaasii/poae RE - Pseudomonas tolaasii/poae V2		5.15147e-07
Rhodococcus qingshengii/jialingiae		0.0495387
	Rhodococcus qingshengii/jialingiae ME - Rhodococcus qingshengii/jialingiae UC		0.496655
	Rhodococcus qingshengii/jialingiae ME - Rhodococcus qingshengii/jialingiae PH		0.499265
	Rhodococcus qingshengii/jialingiae UC - Rhodococcus qingshengii/jialingiae PH		0.459824
	Rhodococcus qingshengii/jialingiae ME - Rhodococcus qingshengii/jialingiae RE		0.488754
	Rhodococcus qingshengii/jialingiae UC - Rhodococcus qingshengii/jialingiae RE		0.446835
	Rhodococcus qingshengii/jialingiae PH - Rhodococcus qingshengii/jialingiae RE		0.43734
	Rhodococcus qingshengii/jialingiae ME - Rhodococcus qingshengii/jialingiae V2		0.0207055
	Rhodococcus qingshengii/jialingiae UC - Rhodococcus qingshengii/jialingiae V2		0.0356638
	Rhodococcus qingshengii/jialingiae PH - Rhodococcus qingshengii/jialingiae V2		0.028019
	Rhodococcus qingshengii/jialingiae RE - Rhodococcus qingshengii/jialingiae V2		0.00799286
Rhodocyclales		0.00309875
	Rhodocyclales ME - Rhodocyclales UC		0.5
	Rhodocyclales ME - Rhodocyclales PH		0.133349
	Rhodocyclales UC - Rhodocyclales PH		0.131086
	Rhodocyclales ME - Rhodocyclales RE		0.555556
	Rhodocyclales UC - Rhodocyclales RE		0.625
	Rhodocyclales PH - Rhodocyclales RE		0.115529
	Rhodocyclales ME - Rhodocyclales V2		0.000976442
	Rhodocyclales UC - Rhodocyclales V2		0.00186904
	Rhodocyclales PH - Rhodocyclales V2		0.0496552
	Rhodocyclales RE - Rhodocyclales V2		0.000608477
Rhodospirillales		0.0420565
	Rhodospirillales ME - Rhodospirillales UC		0.232614
	Rhodospirillales ME - Rhodospirillales PH		0.463676
	Rhodospirillales UC - Rhodospirillales PH		0.257134
	Rhodospirillales ME - Rhodospirillales RE		0.397077
	Rhodospirillales UC - Rhodospirillales RE		0.324689
	Rhodospirillales PH - Rhodospirillales RE		0.411145
	Rhodospirillales ME - Rhodospirillales V2		0.0292526
	Rhodospirillales UC - Rhodospirillales V2		0.00742244
	Rhodospirillales PH - Rhodospirillales V2		0.0352375
	Rhodospirillales RE - Rhodospirillales V2		0.0166917
Romboutsia		0.0242404
	Romboutsia ME - Romboutsia UC		0.15418
	Romboutsia ME - Romboutsia PH		0.0853408
	Romboutsia UC - Romboutsia PH		0.406887
	Romboutsia ME - Romboutsia RE		0.0321808
	Romboutsia UC - Romboutsia RE		0.2358
	Romboutsia PH - Romboutsia RE		0.267292
	Romboutsia ME - Romboutsia V2		0.0011112
	Romboutsia UC - Romboutsia V2		0.0997734
	Romboutsia PH - Romboutsia V2		0.0896032
	Romboutsia RE - Romboutsia V2		0.19482
Roseburia faecis		0.0241247
	Roseburia faecis ME - Roseburia faecis UC		0.282801
	Roseburia faecis ME - Roseburia faecis PH		0.0223086
	Roseburia faecis UC - Roseburia faecis PH		0.143278
	Roseburia faecis ME - Roseburia faecis RE		0.0293452
	Roseburia faecis UC - Roseburia faecis RE		0.16669
	Roseburia faecis PH - Roseburia faecis RE		0.497311
	Roseburia faecis ME - Roseburia faecis V2		0.00267017
	Roseburia faecis UC - Roseburia faecis V2		0.0379038
	Roseburia faecis PH - Roseburia faecis V2		0.231491
	Roseburia faecis RE - Roseburia faecis V2		0.251393
Sphingomonas		0.00178559
	Sphingomonas ME - Sphingomonas UC		0.0983897
	Sphingomonas ME - Sphingomonas PH		0.00542817
	Sphingomonas UC - Sphingomonas PH		0.144664
	Sphingomonas ME - Sphingomonas RE		0.0816907
	Sphingomonas UC - Sphingomonas RE		0.495974
	Sphingomonas PH - Sphingomonas RE		0.127955
	Sphingomonas ME - Sphingomonas V2		3.68325e-05
	Sphingomonas UC - Sphingomonas V2		0.0246405
	Sphingomonas PH - Sphingomonas V2		0.130022
	Sphingomonas RE - Sphingomonas V2		0.0139165
Staphylococcus aureus		0.0424985
	Staphylococcus aureus ME - Staphylococcus aureus UC		0.325881
	Staphylococcus aureus ME - Staphylococcus aureus PH		0.389562
	Staphylococcus aureus UC - Staphylococcus aureus PH		0.425283
	Staphylococcus aureus ME - Staphylococcus aureus RE		0.336708
	Staphylococcus aureus UC - Staphylococcus aureus RE		0.499654
	Staphylococcus aureus PH - Staphylococcus aureus RE		0.462834
	Staphylococcus aureus ME - Staphylococcus aureus V2		0.00421837
	Staphylococcus aureus UC - Staphylococcus aureus V2		0.0507524
	Staphylococcus aureus PH - Staphylococcus aureus V2		0.0234148
	Staphylococcus aureus RE - Staphylococcus aureus V2		0.0351054
Staphylococcus capitis/epidermidis/caprae		0.0122522
	Staphylococcus capitis/epidermidis/caprae ME - Staphylococcus capitis/epidermidis/caprae UC		0.088
	Staphylococcus capitis/epidermidis/caprae ME - Staphylococcus capitis/epidermidis/caprae PH		0.204775
	Staphylococcus capitis/epidermidis/caprae UC - Staphylococcus capitis/epidermidis/caprae PH		0.263687
	Staphylococcus capitis/epidermidis/caprae ME - Staphylococcus capitis/epidermidis/caprae RE		0.427331
	Staphylococcus capitis/epidermidis/caprae UC - Staphylococcus capitis/epidermidis/caprae RE		0.105958
	Staphylococcus capitis/epidermidis/caprae PH - Staphylococcus capitis/epidermidis/caprae RE		0.23874
	Staphylococcus capitis/epidermidis/caprae ME - Staphylococcus capitis/epidermidis/caprae V2		0.0368318
	Staphylococcus capitis/epidermidis/caprae UC - Staphylococcus capitis/epidermidis/caprae V2		0.00136852
	Staphylococcus capitis/epidermidis/caprae PH - Staphylococcus capitis/epidermidis/caprae V2		0.0036281
	Staphylococcus capitis/epidermidis/caprae RE - Staphylococcus capitis/epidermidis/caprae V2		0.0328711
Staphylococcus haemolyticus/devriesei		0.0306853
	Staphylococcus haemolyticus/devriesei ME - Staphylococcus haemolyticus/devriesei UC		0.168018
	Staphylococcus haemolyticus/devriesei ME - Staphylococcus haemolyticus/devriesei PH		0.472445
	Staphylococcus haemolyticus/devriesei UC - Staphylococcus haemolyticus/devriesei PH		0.164544
	Staphylococcus haemolyticus/devriesei ME - Staphylococcus haemolyticus/devriesei RE		0.477166
	Staphylococcus haemolyticus/devriesei UC - Staphylococcus haemolyticus/devriesei RE		0.157739
	Staphylococcus haemolyticus/devriesei PH - Staphylococcus haemolyticus/devriesei RE		0.505788
	Staphylococcus haemolyticus/devriesei ME - Staphylococcus haemolyticus/devriesei V2		0.00893845
	Staphylococcus haemolyticus/devriesei UC - Staphylococcus haemolyticus/devriesei V2		0.179711
	Staphylococcus haemolyticus/devriesei PH - Staphylococcus haemolyticus/devriesei V2		0.0135545
	Staphylococcus haemolyticus/devriesei RE - Staphylococcus haemolyticus/devriesei V2		0.00822715
Staphylococcus pasteuri/warneri		0.0189276
	Staphylococcus pasteuri/warneri ME - Staphylococcus pasteuri/warneri UC		0.51341
	Staphylococcus pasteuri/warneri ME - Staphylococcus pasteuri/warneri PH		0.371791
	Staphylococcus pasteuri/warneri UC - Staphylococcus pasteuri/warneri PH		0.405273
	Staphylococcus pasteuri/warneri ME - Staphylococcus pasteuri/warneri RE		0.485361
	Staphylococcus pasteuri/warneri UC - Staphylococcus pasteuri/warneri RE		0.466964
	Staphylococcus pasteuri/warneri PH - Staphylococcus pasteuri/warneri RE		0.389059
	Staphylococcus pasteuri/warneri ME - Staphylococcus pasteuri/warneri V2		0.00398113
	Staphylococcus pasteuri/warneri UC - Staphylococcus pasteuri/warneri V2		0.0114099
	Staphylococcus pasteuri/warneri PH - Staphylococcus pasteuri/warneri V2		0.0254557
	Staphylococcus pasteuri/warneri RE - Staphylococcus pasteuri/warneri V2		0.00420424
Steroidobacteraceae		0.00333924
	Steroidobacteraceae ME - Steroidobacteraceae UC		0.00658834
	Steroidobacteraceae ME - Steroidobacteraceae PH		0.0324494
	Steroidobacteraceae UC - Steroidobacteraceae PH		0.189694
	Steroidobacteraceae ME - Steroidobacteraceae RE		0.154238
	Steroidobacteraceae UC - Steroidobacteraceae RE		0.0597747
	Steroidobacteraceae PH - Steroidobacteraceae RE		0.197714
	Steroidobacteraceae ME - Steroidobacteraceae V2		0.000205616
	Steroidobacteraceae UC - Steroidobacteraceae V2		0.298324
	Steroidobacteraceae PH - Steroidobacteraceae V2		0.0777423
	Steroidobacteraceae RE - Steroidobacteraceae V2		0.00917725
Streptococcus		0.0174413
	Streptococcus ME - Streptococcus UC		0.473816
	Streptococcus ME - Streptococcus PH		0.302419
	Streptococcus UC - Streptococcus PH		0.274483
	Streptococcus ME - Streptococcus RE		0.240537
	Streptococcus UC - Streptococcus RE		0.268356
	Streptococcus PH - Streptococcus RE		0.0824223
	Streptococcus ME - Streptococcus V2		0.0108377
	Streptococcus UC - Streptococcus V2		0.025279
	Streptococcus PH - Streptococcus V2		0.00118373
	Streptococcus RE - Streptococcus V2		0.0681893
Streptococcus gordonii		0.0184746
	Streptococcus gordonii ME - Streptococcus gordonii UC		0.00418421
	Streptococcus gordonii ME - Streptococcus gordonii PH		0.00455581
	Streptococcus gordonii UC - Streptococcus gordonii PH		0.5
	Streptococcus gordonii ME - Streptococcus gordonii RE		0.0204631
	Streptococcus gordonii UC - Streptococcus gordonii RE		0.319696
	Streptococcus gordonii PH - Streptococcus gordonii RE		0.340102
	Streptococcus gordonii ME - Streptococcus gordonii V2		0.00524486
	Streptococcus gordonii UC - Streptococcus gordonii V2		0.390121
	Streptococcus gordonii PH - Streptococcus gordonii V2		0.421073
	Streptococcus gordonii RE - Streptococcus gordonii V2		0.40219
Streptococcus salivarius/vestibularis		0.0126525
	Streptococcus salivarius/vestibularis ME - Streptococcus salivarius/vestibularis UC		0.405818
	Streptococcus salivarius/vestibularis ME - Streptococcus salivarius/vestibularis PH		0.452117
	Streptococcus salivarius/vestibularis UC - Streptococcus salivarius/vestibularis PH		0.386862
	Streptococcus salivarius/vestibularis ME - Streptococcus salivarius/vestibularis RE		0.463249
	Streptococcus salivarius/vestibularis UC - Streptococcus salivarius/vestibularis RE		0.496183
	Streptococcus salivarius/vestibularis PH - Streptococcus salivarius/vestibularis RE		0.390228
	Streptococcus salivarius/vestibularis ME - Streptococcus salivarius/vestibularis V2		0.00307416
	Streptococcus salivarius/vestibularis UC - Streptococcus salivarius/vestibularis V2		0.0296595
	Streptococcus salivarius/vestibularis PH - Streptococcus salivarius/vestibularis V2		0.00244232
	Streptococcus salivarius/vestibularis RE - Streptococcus salivarius/vestibularis V2		0.00392191
Streptococcus sanguinis		0.0270726
	Streptococcus sanguinis ME - Streptococcus sanguinis UC		0.4687
	Streptococcus sanguinis ME - Streptococcus sanguinis PH		0.161577
	Streptococcus sanguinis UC - Streptococcus sanguinis PH		0.156685
	Streptococcus sanguinis ME - Streptococcus sanguinis RE		0.0197866
	Streptococcus sanguinis UC - Streptococcus sanguinis RE		0.0147005
	Streptococcus sanguinis PH - Streptococcus sanguinis RE		0.112129
	Streptococcus sanguinis ME - Streptococcus sanguinis V2		0.0192618
	Streptococcus sanguinis UC - Streptococcus sanguinis V2		0.0199076
	Streptococcus sanguinis PH - Streptococcus sanguinis V2		0.152375
	Streptococcus sanguinis RE - Streptococcus sanguinis V2		0.416934
Sutterella		0.0033138
	Sutterella ME - Sutterella UC		0.223501
	Sutterella ME - Sutterella PH		0.0878641
	Sutterella UC - Sutterella PH		0.325183
	Sutterella ME - Sutterella RE		0.03126
	Sutterella UC - Sutterella RE		0.204816
	Sutterella PH - Sutterella RE		0.317053
	Sutterella ME - Sutterella V2		0.0729155
	Sutterella UC - Sutterella V2		0.0157801
	Sutterella PH - Sutterella V2		0.00181611
	Sutterella RE - Sutterella V2		0.000250328
Varibaculum		3.70011e-05
	Varibaculum ME - Varibaculum UC		0.292672
	Varibaculum ME - Varibaculum PH		0.397695
	Varibaculum UC - Varibaculum PH		0.4029
	Varibaculum ME - Varibaculum RE		0.371908
	Varibaculum UC - Varibaculum RE		0.397162
	Varibaculum PH - Varibaculum RE		0.396993
	Varibaculum ME - Varibaculum V2		4.97447e-06
	Varibaculum UC - Varibaculum V2		0.00166224
	Varibaculum PH - Varibaculum V2		3.53901e-05
	Varibaculum RE - Varibaculum V2		5.22924e-05
Winkia neuli		0.0101923
	Winkia neuli ME - Winkia neuli UC		0.201914
	Winkia neuli ME - Winkia neuli PH		0.19701
	Winkia neuli UC - Winkia neuli PH		0.435041
	Winkia neuli ME - Winkia neuli RE		0.461789
	Winkia neuli UC - Winkia neuli RE		0.199243
	Winkia neuli PH - Winkia neuli RE		0.203652
	Winkia neuli ME - Winkia neuli V2		0.00133387
	Winkia neuli UC - Winkia neuli V2		0.0732591
	Winkia neuli PH - Winkia neuli V2		0.0273476
	Winkia neuli RE - Winkia neuli V2		0.00119449
The difference in distribution was tested by the Kruskal-Wallis test with Benjamini-Hochberg corrections for multiple comparisons. Groups of samples were considered significantly different if the adjusted p-value was <0.05. Only taxa fulfilling this criterion are shown. Pairwise comparisons wer performed between vaginal samples taken at birth (V2), meconium (ME), umbilical cord blood (UC), pharyn…
